# Supplementary material
Source: PubMed Central journal article supplement (PMC6955098)
Supplement: NIHMS1060545-supplement-supplemental.pdf [file NIHMS1060545-supplement-supplemental.pdf]

## Supporting Information for

### Synthesis of Spirobicyclic Pyrazoles by Intramolecular Dipolar Cycloadditions/[1s, 5s] Sigmatropic Rearrangements

Christine A. Dimirjian‡, Marta Castiñeira Reis‡, Edward I. Balmond, Nolan C. Turman, Elys P. Rodriguez, Michael J. Di Maso, James C. Fettinger, Dean J. Tantillo and Jared T. Shaw\*

Department of Chemistry, University of California, One Shields Ave, Davis, CA 95616

Email: Jared T. Shaw – jtshaw@ucdavis.edu

## Experimental Details and Compound Characterization

| Table of Contents                                                                                                           | Page |
|-----------------------------------------------------------------------------------------------------------------------------|------|
| 1. Materials and Instrumentation                                                                                            | S2   |
| 2. Experimental Procedures for synthesis of spiropyrazoles from ketones <b>1a-1j</b> , <b>13</b> ,<br><b>20</b> , <b>24</b> | S3   |
| 3. Experimental Procedures for synthesis of ketones                                                                         | S23  |
| 4. X-ray Crystallography Data                                                                                               | S28  |
| 5. <sup>1</sup> H and <sup>13</sup> C NMR spectra                                                                           | S54  |
| 6. Computational Work                                                                                                       | S163 |

## 1. Materials and Instrumentation

Unless otherwise specified, all commercially available reagents were used as received. All reactions using dried solvents were carried out under an atmosphere of argon in flame dried glassware with magnetic stirring. Dry solvent was dispensed from a solvent purification system that passes solvent through two columns of dry neutral alumina. Microwave reactions were run in sealed 2-10 mL glass microwave vials used in a Biotage Microwave reactor.  $^1\text{H}$  NMR spectra and proton decoupled  $^{13}\text{C}$  NMR spectra were obtained on a 400 MHz Bruker or 600 MHz Varian NMR spectrometer at ambient temperature.  $^1\text{H}$  Chemical shifts ( $\delta$ ) are reported in parts per million (ppm) relative to TMS (s,  $\delta$  0.00). Multiplicities are given as: s (singlet), d (doublet), t (triplet), q (quartet), p (pentet), h (hextet), and m (multiplet). Complex splitting will be described by a combination of these abbreviations, i.e. dd (doublet of doublets).  $^{13}\text{C}$  NMR chemical shifts are reported relative to  $\text{CDCl}_3$  (t,  $\delta$  77.4) unless otherwise noted. High resolution mass spectra were recorded on positive ESI mode unless otherwise noted. Melting points were taken on an EZ-melting apparatus and were uncorrected. Infrared spectra were taken on a Bruker Tensor 27 spectrometer. Chromatographic purifications were performed by flash chromatography with silica gel (Fisher, 40–63  $\mu\text{m}$ ) packed in glass columns. The eluting solvent for the purification of each compound was determined by thin-layer chromatography (TLC) on glass plates coated with silica gel 60 F254 and visualized by ultraviolet light.

## 2. Synthesis of Spiropyrazoles from Ketones

### General Procedure A for ketones (1a-1j)

2'-Hydroxybenzophenone (1.0 equiv) was dissolved in CH<sub>3</sub>CN (0.1 M) followed by the addition of Cs<sub>2</sub>CO<sub>3</sub> (3.0 equiv) and the respective propargyl bromide (1.5 equiv). The mixture was heated at 80 °C for 18 h before being filtered and concentrated *in vacuo*. The crude residue was purified by flash column chromatography (90:10 or 80:20 hexanes:EtOAc) to afford the desired ketone.

### General Procedure B for hydrazones (2a-2j)

A solution of ketone (1a-1j, 1 equiv) in anhydrous ethanol (0.1 M) was sparged with Argon for 30 minutes. N<sub>2</sub>H<sub>4</sub> (6 equiv) and AcOH (1.2 equiv) were added and the solution was again purged with Argon for 5 min. The solution was then heated in microwave for 1-2 hrs at 160 °C. The solution was diluted with diethyl ether (10 mL), washed with dionized H<sub>2</sub>O (10 mL), and extracted with diethyl ether (3 x 10 mL). The combine organic phase was dried over Na<sub>2</sub>SO<sub>4</sub> and concentrated *in vacuo* to afford the crude hydrazone. For most compounds, it was best to immediately carry the crude product to the next reaction without further purification. In some cases, the product was purified by flash column chromatography (80:20 hexanes:EtOAc).

### General Procedure C for dipolar cycloaddition products (3a-3j)

To a solution of hydrazone (1 equiv) in dichloromethane (0.1 M), MnO<sub>2</sub> (10 equiv) was added. The resulting suspension was allowed to stir overnight at room temperature. The reaction was then filtered over a pad of Celite and concentrated *in vacuo*. The crude residue was purified by flash column chromatography (90:10 or 80:20 hexanes:EtOAc) to afford the desired product.

### General Procedure D for spirocycles (4a-4j)

The previously obtained pyrazole (1 equiv) was dissolved in CH<sub>3</sub>CN (0.1 M) and heated at reflux for 16 h. The solution was concentrated *in vacuo* and the crude residue was purified by column chromatography (80:20, hexanes:EtOAc) to afford the desired spirocycle.

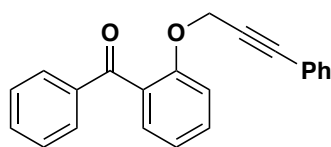

### Phenyl(2-((3-phenylprop-2-yn-1-yl)oxy)phenyl)methanone (1a)

Following general procedure A, 2'-hydroxybenzophenone (150.0 mg, 0.76 mmol) was dissolved in CH<sub>3</sub>CN (7.6 mL) followed by the addition of Cs<sub>2</sub>CO<sub>3</sub> (0.74 g, 2.3 mmol) and bromide **8** (0.135g, 1.1 mmol). The crude residue was purified by column chromatography (90:10 Hexanes:EtOAc) to afford the desired ketone (210.1 mg, 89%) as a white solid. <sup>1</sup>H NMR (600 MHz, Chloroform-*d*) δ 7.84 (d, *J* = 7.7 Hz, 2H), 7.51 (dt, *J* = 23.4, 7.7 Hz, 2H), 7.39 (dd, *J* = 29.8, 7.4 Hz, 5H), 7.30 (dd, *J* = 10.5, 6.9 Hz, 3H), 7.23 (t, *J* = 8.5 Hz, 1H), 7.10 (t, *J* = 7.6 Hz, 1H), 4.82 (s, 2H). IR: 3365, 1661, 1596, 1316, 755, 700 cm<sup>-1</sup>. <sup>1</sup>H NMR spectrum is consistent with literature data.<sup>1</sup>

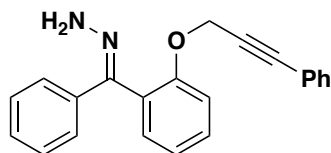

### Phenyl(2-((3-phenylprop-2-yn-1-yl)oxy)phenyl)methylene)hydrazine (**2a**)

Following general procedure B, **1a** (95.9 mg, 0.31 mmol) was dissolved in anhydrous EtOH (3.1 mL), and N<sub>2</sub>H<sub>4</sub> (60 μL, 1.8 mmol) and AcOH (21 μL, 0.37 mmol) were added. The crude product was purified by flash column chromatography (80:20 Hexanes:ethyl acetate) to afford an off-white amorphous solid (87.9 mg, 88%): <sup>1</sup>H NMR (400 MHz, Chloroform-*d*) δ 7.51 (dd, *J* = 2.5, 1.7 Hz, 1H), 7.48 – 7.43 (m, 1H), 7.37 – 7.33 (m, 2H), 7.32 – 7.21 (m, 8H), 7.18 – 7.11 (m, 2H), 5.45 (s, 2H), 4.89 (s, 2H); <sup>13</sup>C NMR (101 MHz, CDCl<sub>3</sub>) δ 154.7, 146.8, 138.3, 131.7, 130.5, 130.4, 128.7, 128.3, 128.1, 127.9, 126.1, 122.6, 122.5, 122.1, 114.1, 87.4, 83.8, 56.9; IR: 3409, 2919, 2850, 1598, 1488, 1445, 1218, 756, 692 cm<sup>-1</sup>; AMM *m/z* calcd for C<sub>22</sub>H<sub>19</sub>N<sub>2</sub>O<sup>+</sup> (M + H)<sup>+</sup> 327.1492, found 327.1495.

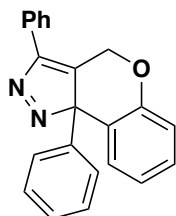

### 3,9b-diphenyl-4,9b-dihydrochromeno[4,3-c]pyrazole (**3a**)

Following general procedure C, to a solution of hydrazone **2a** (55.7 mg, 0.17 mmol) in anhydrous CH<sub>2</sub>Cl<sub>2</sub> (1.7 mL) was added MnO<sub>2</sub> (148.3 mg, 1.7 mmol). The crude residue was purified by column chromatography (80:20 hexanes:EtOAc) to afford the desired pyrazole as a white amorphous solid (51.3 mg, 92%): <sup>1</sup>H NMR (400 MHz, Chloroform-*d*) δ 7.96 (dd, *J* = 7.7, 1.7 Hz, 1H), 7.87 – 7.81 (m, 2H), 7.55 – 7.49 (m, 2H), 7.48 – 7.43 (m, 1H), 7.33 – 7.24 (m, 4H), 7.09 (td, *J* = 7.5, 1.2 Hz, 1H), 6.98 (dd, *J* = 8.2, 1.2 Hz, 1H), 6.95 – 6.90 (m, 2H), 5.33 (d, *J* = 14.8 Hz, 1H), 5.15 (d, *J* = 14.7 Hz, 1H); <sup>13</sup>C NMR (101 MHz, CDCl<sub>3</sub>) δ 153.3, 149.8, 144.3, 134.1, 130.3, 129.7, 129.5, 129.2, 129.1, 129.0, 128.7, 128.4, 126.2, 121.9, 121.8, 117.0, 100.6, 62.7; IR: 3508, 3029, 2923, 1633, 1601, 1578, 1482, 1451, 1296, 755, 697 cm<sup>-1</sup>; AMM *m/z* calcd for C<sub>22</sub>H<sub>17</sub>N<sub>2</sub>O<sup>+</sup> (M + H)<sup>+</sup> 325.1335, found 325.1337.

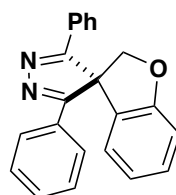

### 3',5'-diphenyl-2H-spiro[benzofuran-3,4'-pyrazole] (**4a**)

Following general procedure D, pyrazole **3a** (45.0 mg, 0.13 mmol) was dissolved in CH<sub>3</sub>CN (1.3 mL). The solution was concentrated *in vacuo* and the crude residue was purified by column chromatography (80:20, hexanes:EtOAc) to afford the desired spirocycle as an off-white solid (43.7 mg, 97%): <sup>1</sup>H NMR (400 MHz, Chloroform-*d*) δ 7.82 – 7.72 (m, 4H), 7.45 – 7.38 (m, 2H), 7.38 – 7.29 (m, 5H), 7.13 (d, *J* = 8.2 Hz, 1H), 6.86 – 6.77 (m, 2H), 4.93 (s, 2H); <sup>13</sup>C NMR (101 MHz, CDCl<sub>3</sub>) δ 175.8, 160.6, 131.4, 130.8, 129.0, 128.9, 127.9, 126.0, 123.8, 122.3, 111.2, 75.6, 70.9; m.p. 176.0–179.2 °C; IR: 3424, 2961, 2158, 1481, 1243, 773, 753, 732, 692 cm<sup>-1</sup>. AMM *m/z* calcd for C<sub>22</sub>H<sub>17</sub>N<sub>2</sub>O<sup>+</sup> (M + H)<sup>+</sup> 325.1335, found 325.1337.

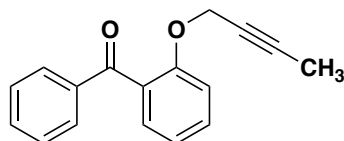

**(2-(but-2-yn-1-yloxy)phenyl)(phenyl)methanone (1b)**

Following general procedure A, 2'-hydroxybenzophenone (226.6 mg, 1.14 mmol) was dissolved in CH<sub>3</sub>CN (10.0 mL) followed by the addition of Cs<sub>2</sub>CO<sub>3</sub> (1.11 g, 3.42 mmol) and 1-bromo-2-butyne (0.13 mL, 1.48 mmol). The crude residue was purified by column chromatography (90:10 hexanes:EtOAc) to afford the desired ketone (279.0 mg, 97%) as an amorphous white solid: <sup>1</sup>H NMR (400 MHz, Chloroform-*d*) δ 7.86 – 7.77 (m, 2H), 7.53 (m, 1H), 7.46 (m, 1H), 7.43 – 7.36 (m, 3H), 7.14 (d, *J* = 8.4, 0.9 Hz, 1H), 7.07 (td, *J* = 7.5, 0.9 Hz, 1H), 4.55 (q, *J* = 2.4 Hz, 2H), 1.78 (t, *J* = 2.4 Hz, 3H); <sup>13</sup>C NMR (101 MHz, CDCl<sub>3</sub>) δ 196.3, 155.7, 137.8, 132.9, 131.8, 130.0, 129.8, 129.6, 128.2, 121.2, 113.6, 84.0, 73.8, 57.0, 3.7; AMM *m/z* calcd for C<sub>17</sub>H<sub>15</sub>O<sup>+</sup> (M + H)<sup>+</sup> 251.1067, found 251.1065.

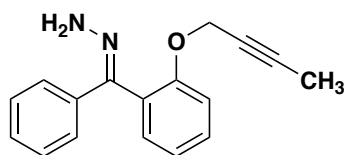

**((2-(but-2-yn-1-yloxy)phenyl)(phenyl)methylene)hydrazine (2b)**

Following general procedure B, **1b** (98.7 mg, 0.39 mmol) was dissolved in anhydrous EtOH (3.9 mL), and N<sub>2</sub>H<sub>4</sub> (74 μL, 2.4 mmol) and AcOH (27 μL, 0.47 mmol) were added. The crude product was purified by flash column chromatography (85:15 hexanes:ethyl acetate) to afford a yellow oil (80.0 mg, 77%): <sup>1</sup>H NMR (400 MHz, Chloroform-*d*) δ 7.54 – 7.47 (m, 2H), 7.47 – 7.40 (m, 1H), 7.31 – 7.24 (m, 3H), 7.22 (d, *J* = 8.4 Hz, 1H), 7.16 – 7.09 (m, 2H), 5.44 (s, 2H), 4.64 (q, *J* = 2.3 Hz, 2H), 1.79 (t, *J* = 2.3 Hz, 3H); <sup>13</sup>C NMR (101 MHz, CDCl<sub>3</sub>) δ 154.8, 147.0, 138.3, 130.4, 130.4, 128.1, 127.9, 126.2, 122.2, 113.8, 83.9, 77.2, 73.9, 56.7, 3.7; AMM *m/z* calcd for C<sub>17</sub>H<sub>17</sub>N<sub>2</sub>O<sup>+</sup> (M + H)<sup>+</sup> 265.1335, found 265.0687.

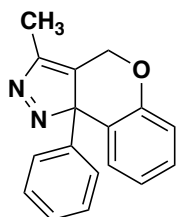

**3-methyl-9b-phenyl-4,9b-dihydrochromeno[4,3-c]pyrazole (3b)**

Following general procedure C, to a solution of hydrazone **2b** (31.0 mg, 0.1 mmol) in anhydrous CH<sub>2</sub>Cl<sub>2</sub> (1.2 mL) was added MnO<sub>2</sub> (102 mg, 1.2 mmol). Crude mixture was purified by flash column chromatography (80:20 Hexanes:EtOAc) to afford **3b** (18.2 mg, 60%), <sup>1</sup>H NMR (400 MHz, Chloroform-*d*) δ 7.90 (dd, *J* = 7.7, 1.7 Hz, 1H), 7.30 (dd, *J* = 6.4, 2.9 Hz, 4H), 7.07 (td, *J* = 7.5, 1.3 Hz, 1H), 6.98 (dd, *J* = 8.3, 1.2 Hz, 1H), 6.91 – 6.84 (m, 2H), 5.05 (d, *J* = 13.3 Hz, 1H), 4.85 (dq, *J* = 13.3, 1.6 Hz, 1H), 2.52 (d, *J* = 1.6 Hz, 3H); <sup>13</sup>C NMR (101 MHz, CDCl<sub>3</sub>) δ 153.4, 148.1, 144.4, 134.5, 129.8, 129.7, 129.0, 128.5, 128.1, 126.6, 126.2, 121.4, 121.3, 116.8, 99.1, 61.1, 11.7; AMM *m/z* calcd for C<sub>17</sub>H<sub>15</sub>N<sub>2</sub>O<sup>+</sup> (M + H)<sup>+</sup> 263.1179, found 263.1176.

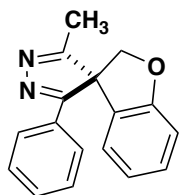

**(R)-3'-methyl-5'-phenyl-2H-spiro[benzofuran-3,4'-pyrazole] (4b)**

Hydrazone **1b** (63.4 mg, 0.24 mmol) was subjected to general procedure C. Residue was then dissolved in CH<sub>3</sub>CN (2.4 mL). Following general procedure D, the solution was concentrated *in vacuo* and the crude residue was purified by column chromatography (80:20, hexanes:EtOAc) to afford the desired spirocycle (27.1 mg, 42% over two steps). <sup>1</sup>H NMR (600 MHz, Chloroform-*d*) δ 7.74 – 7.66 (m, 2H), 7.42 – 7.35 (m, 1H), 7.35 – 7.25 (m, 3H), 7.04 (d, *J* = 8.2 Hz, 1H), 6.87 (t, *J* = 7.5 Hz, 1H), 6.72 (d, *J* = 7.6 Hz, 1H), 4.76 (dd, *J* = 10.0, 1.8 Hz, 1H), 4.66 (dd, *J* = 10.0, 1.8 Hz, 1H), 2.14 (s, 3H); <sup>13</sup>C NMR (151 MHz, CDCl<sub>3</sub>) δ 177.7, 174.9, 160.8, 131.4, 130.8, 129.1, 129.1, 127.9, 124.6, 123.6, 122.3, 111.3, 74.3, 72.6, 12.6; AMM *m/z* calcd for C<sub>17</sub>H<sub>15</sub>N<sub>2</sub>O<sup>+</sup> (M + H)<sup>+</sup> 263.1179, found 263.1177.

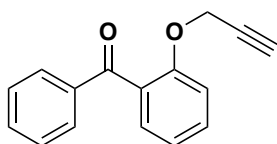

**phenyl(2-(prop-2-yn-1-yloxy)phenyl)methanone (1c)**

Following general procedure A, 2'-hydroxybenzophenone (407.2 mg, 2.1 mmol) was dissolved in CH<sub>3</sub>CN (15.0 mL) followed by the addition of Cs<sub>2</sub>CO<sub>3</sub> (2.00 g, 6.2 mmol) and propargyl bromide (369.1 mg, 3.1 mmol). The crude residue was purified by column chromatography (80:20 hexanes:EtOAc) afforded the desired ketone (473.9 mg, 98%) as a white solid: <sup>1</sup>H NMR (400 MHz, Chloroform-*d*) δ 7.89 – 7.81 (m, 2H), 7.58 (tt, *J* = 8.0, 6.9, 1.3, 1.3 Hz, 1H), 7.52 (dd, *J* = 7.4, 1.8 Hz, 1H), 7.48 – 7.40 (m, 3H), 7.18 (dd, *J* = 8.4, 0.9 Hz, 1H), 7.13 (td, *J* = 7.5, 0.9 Hz, 1H), 4.64 (d, *J* = 2.4 Hz, 2H), 2.47 (t, *J* = 2.4 Hz, 1H); <sup>13</sup>C NMR (151 MHz, CDCl<sub>3</sub>) δ 196.1, 155.1, 137.6, 133.0, 131.7, 129.9, 129.8, 129.5, 128.2, 121.5, 113.2, 78.0, 75.8, 56.1; AMM *m/z* calcd for C<sub>16</sub>H<sub>13</sub>O<sup>+</sup> (M + H)<sup>+</sup> 273.0910, found 273.0906.

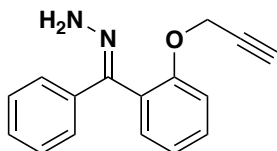

**(E)-(phenyl(2-(prop-2-yn-1-yloxy)phenyl)methylene)hydrazine (2c)**

Following general procedure B, **1c** (155.1 mg, 0.66 mmol) was dissolved in anhydrous EtOH (6.6 mL), and N<sub>2</sub>H<sub>4</sub> (120 μL, 3.96 mmol) and AcOH (45 μL, 0.79 mmol) were added. The crude product was purified by flash column chromatography (80:20 hexanes:ethyl acetate) to afford a yellow oil (141.7 mg, 86%): <sup>1</sup>H NMR (400 MHz, Chloroform-*d*) δ 7.52 – 7.42 (m, 3H), 7.26 (dd, *J* = 6.2, 4.1 Hz, 3H), 7.22 (d, *J* = 8.3 Hz, 1H), 7.15 (d, *J* = 4.5 Hz, 2H), 5.43 (s, 2H), 4.67 (d, *J* = 2.4 Hz, 2H), 2.44 (t, *J* = 2.4 Hz, 1H); <sup>13</sup>C NMR (101 MHz, CDCl<sub>3</sub>) δ 154.5, 146.7, 138.2, 130.5,

130.4, 128.1, 128.0, 126.1, 122.6, 122.5, 113.8, 78.4, 75.8, 56.0; AMM  $m/z$  calcd for  $C_{16}H_{15}N_2O^+$  ( $M + H$ )<sup>+</sup> 251.1179, found 251.1175.

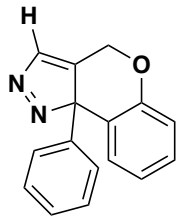

### 9b-phenyl-4,9b-dihydrochromeno[4,3-c]pyrazole (3c)

Following general procedure C, to a solution of hydrazone **2c** (33.7 mg, 0.13 mmol) in anhydrous  $CH_2Cl_2$  (1.3 mL) was added  $MnO_2$  (113 mg, 1.3 mmol). The crude residue was purified by column chromatography (80:20 hexanes:EtOAc) to afford the desired pyrazole as a yellow oil (38.8 mg, 67%):  $^1H$  NMR (400 MHz, Chloroform-*d*)  $\delta$  7.89 (dd,  $J = 7.7, 1.7$  Hz, 1H), 7.64 (d,  $J = 1.9$  Hz, 1H), 7.30 – 7.25 (m, 3H), 7.06 (td,  $J = 7.5, 1.3$  Hz, 1H), 6.98 (dd,  $J = 8.3, 1.2$  Hz, 1H), 6.90 – 6.79 (m, 2H), 5.15 (d,  $J = 13.6$  Hz, 1H), 4.88 (dd,  $J = 13.6, 2.0$  Hz, 1H).  $^{13}C$  NMR (151 MHz,  $CDCl_3$ )  $\delta$  153.5, 153.4, 138.4, 133.4, 129.9, 129.8, 129.1, 128.8, 126.2, 121.6, 120.9, 116.8, 97.9, 77.2, 77.0, 76.8, 61.5, 29.7, 1.0. AMM  $m/z$  calcd for  $C_{16}H_{13}N_2O^+$  ( $M + H$ )<sup>+</sup> 249.1022, found 249.1020.

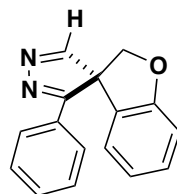

### (*R*)-3'-phenyl-2H-spiro[benzofuran-3,4'-pyrazole] (4c)

Following general procedure D, pyrazole **3c** (33.1 mg, 0.13 mmol) was dissolved in  $CH_3CN$  (1.3 mL). NMR showed <95% conversion to spirocycle, but product was not stable to flash column chromatography.  $^1H$  NMR (600 MHz, Chloroform-*d*)  $\delta$  8.25 (d,  $J = 1.9$  Hz, 1H), 7.84 – 7.72 (m, 2H), 7.43 (d,  $J = 7.2$  Hz, 1H), 7.36 (d,  $J = 8.3$  Hz, 2H), 7.33 – 7.27 (m, 1H), 7.05 (d,  $J = 8.4$  Hz, 1H), 6.87 (t,  $J = 7.7$  Hz, 1H), 6.75 (d,  $J = 7.7$  Hz, 1H), 4.88 (dt,  $J = 10.1, 2.0$  Hz, 1H), 4.76 (dt,  $J = 9.9, 2.0$  Hz, 1H); AMM  $m/z$  calcd for  $C_{16}H_{12}N_2ONa^+$  ( $M + Na$ )<sup>+</sup> 271.0842, found 271.0854.

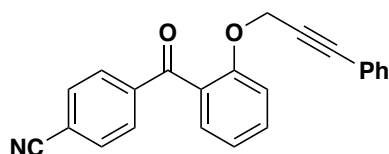

### 4-(2-((3-phenylprop-2-yn-1-yl)oxy)benzoyl)benzonitrile (1d)

Following general procedure A, to a solution of ketone **6** (84.3 mg, 0.38 mmol) dissolved in anhydrous acetonitrile (3.8 mL) were added bromide **8** (110.4 mg, 0.56 mmol) and  $Cs_2CO_3$  (369.5 mg, 1.1 mmol). The crude residue was purified by column chromatography (80:20 Hexanes:EtOAc) to afford as a yellow oil (88.9 mg, 69):  $^1H$  NMR (400 MHz, Chloroform-*d*)  $\delta$  7.90 – 7.87 (m, 2H), 7.71 – 7.67 (m, 2H), 7.60 – 7.53 (m, 1H), 7.50 (dd,  $J = 7.6, 1.8$  Hz, 1H), 7.38 – 7.31 (m, 5H), 7.21 (d,  $J = 8.5$  Hz, 1H), 7.17 – 7.12 (m, 1H), 4.79 (s, 2H);  $^{13}C$  NMR (101 MHz,  $CDCl_3$ )  $\delta$  194.8, 155.6, 141.4, 137.2, 133.0, 132.2, 132.0, 131.7, 130.4, 129.9, 129.5, 129.0, 128.4, 128.2, 121.9, 118.2, 115.8, 113.4, 87.7, 82.8, 56.9; AMM  $m/z$  calcd for  $C_{23}H_{16}NO_2^+$  ( $M + H$ )<sup>+</sup> 338.1176, found 338.1777.

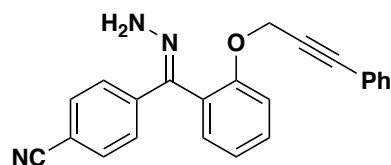

**(E)-4-(hydrazineylidene(2-((3-phenylprop-2-yn-1-yl)oxy)phenyl)methyl)benzonitrile (2d)**

Following general procedure B, **1d** (98.9 mg, 0.29 mmol) was dissolved in anhydrous EtOH (2.9 mL), and N<sub>2</sub>H<sub>4</sub> (55  $\mu$ L, 1.7 mmol) and AcOH (20  $\mu$ L, 0.35 mmol) were added. The crude product was purified by flash column chromatography (80:20 hexanes:ethyl acetate) to afford a yellow oil (48.9 mg, 48%): <sup>1</sup>H NMR (400 MHz, Chloroform-*d*)  $\delta$  7.60 – 7.55 (m, 2H), 7.52 – 7.48 (m, 3H), 7.36 – 7.27 (m, 6H), 7.21 – 7.12 (m, 2H), 5.69 (s, 2H), 4.89 (s, 2H); <sup>13</sup>C NMR (101 MHz, CDCl<sub>3</sub>)  $\delta$  154.7, 143.9, 142.6, 131.9, 131.7, 131.0, 130.4, 128.9, 128.4, 126.3, 122.6, 121.9, 121.1, 119.2, 114.1, 110.7, 87.5, 83.4, 56.8; AMM *m/z* calcd for C<sub>23</sub>H<sub>18</sub>N<sub>3</sub>O<sup>+</sup> (M + H)<sup>+</sup> 352.1444, found 352.1446.

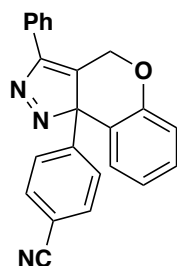

**4-(3-phenylchromeno[4,3-c]pyrazol-9b(4H)-yl)benzonitrile (3d)**

Following general procedure C, to a solution of hydrazone **2d** (48 mg, 0.14 mmol) in anhydrous CH<sub>2</sub>Cl<sub>2</sub> (1.4 mL) was added MnO<sub>2</sub> (121.7 mg, 1.4 mmol). The crude residue was purified by column chromatography (80:20 hexanes:EtOAc) to afford the desired pyrazole as an oil (31 mg, 63%): <sup>1</sup>H NMR (400 MHz, Chloroform-*d*)  $\delta$  7.92 (dd, *J* = 7.7, 1.7 Hz, 1H), 7.87 – 7.81 (m, 2H), 7.63 – 7.48 (m, 5H), 7.36 – 7.30 (m, 1H), 7.12 (td, *J* = 7.6, 1.3 Hz, 1H), 7.09 – 7.04 (m, 2H), 7.01 (dd, *J* = 8.2, 1.2 Hz, 1H), 5.35 (d, *J* = 15.2 Hz, 1H), 5.15 (d, *J* = 15.2 Hz, 1H); <sup>13</sup>C NMR (101 MHz, CDCl<sub>3</sub>)  $\delta$  153.4, 150.9, 143.5, 139.4, 133.0, 130.5, 130.1, 129.9, 129.3, 129.0, 128.6, 127.3, 122.5, 121.3, 118.4, 117.5, 112.9, 100.0, 62.9; AMM *m/z* calcd for C<sub>23</sub>H<sub>16</sub>N<sub>3</sub>O<sup>+</sup> (M + H)<sup>+</sup> 350.1288, found 350.1292.

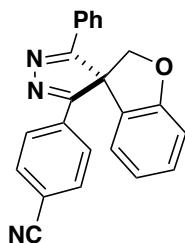

**(R)-4-(3'-phenyl-2H-spiro[benzofuran-3,4'-pyrazol]-5'-yl)benzonitrile (4d)**

Following general procedure D, pyrazole **3d** (31 mg, 0.09 mmol) was dissolved in CH<sub>3</sub>CN (0.9 mL). The solution was concentrated *in vacuo* and the crude residue was purified by column chromatography (80:20, hexanes:EtOAc) to afford an amorphous off-white solid (19 mg, 56%): <sup>1</sup>H NMR (600 MHz, Chloroform-*d*)  $\delta$  7.89 (dd, *J* = 8.3, 1.5 Hz, 2H), 7.78 (dd, *J* = 7.2, 1.6 Hz, 2H), 7.64 (dd, *J* = 8.5, 1.8 Hz, 2H), 7.46 (tt, *J* = 7.4, 1.8, 1.3 Hz, 1H), 7.40 – 7.33 (m, 3H), 7.17 (d, *J* =



8.1 Hz, 1H), 6.87 (td,  $J = 7.5, 0.9$  Hz, 1H), 6.77 (dd,  $J = 7.6, 1.3$  Hz, 1H), 4.95 (d,  $J = 10.3$  Hz, 1H), 4.89 (d,  $J = 10.2$  Hz, 1H);  $^{13}\text{C}$  NMR (151 MHz,  $\text{CDCl}_3$ )  $\delta$  176.8, 174.2, 160.5, 132.8, 132.7, 131.9, 131.3, 129.1, 128.3, 128.2, 128.1, 125.2, 123.7, 122.6, 118.1, 114.5, 111.5, 75.1, 70.9; AMM  $m/z$  calcd for  $\text{C}_{23}\text{H}_{16}\text{N}_3\text{O}^+$  ( $\text{M} + \text{H}$ ) $^+$  350.1288, found 350.1292.

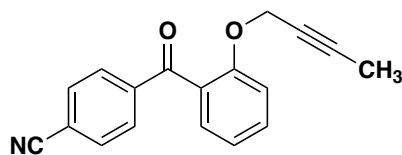

**4-(2-(but-2-yn-1-yloxy)benzoyl)benzotrile (1e)**

Following general procedure A, ketone **6** (73.7 mg, 0.33 mmol) was dissolved in  $\text{CH}_3\text{CN}$  (3.3 mL) followed by the addition of  $\text{Cs}_2\text{CO}_3$  (325.5 mg, 1.0 mmol) and bromide **8** (37  $\mu\text{L}$ , 0.43 mmol). The crude residue was purified by column chromatography (80:20 hexanes:EtOAc) to afford a white solid (72.5 mg, 79%):  $^1\text{H}$  NMR (400 MHz, Chloroform- $d$ )  $\delta$  7.91 – 7.85 (m, 2H), 7.77 – 7.70 (m, 2H), 7.55 (ddd,  $J = 8.6, 7.5, 1.8$  Hz, 1H), 7.50 (dd,  $J = 7.7, 1.8$  Hz, 1H), 7.18 – 7.09 (m, 2H), 4.53 (q,  $J = 2.3$  Hz, 2H), 1.82 (t,  $J = 2.3$  Hz, 3H);  $^{13}\text{C}$  NMR (101 MHz,  $\text{CDCl}_3$ )  $\delta$  194.9, 155.9, 141.6, 133.1, 132.1, 130.4, 130.0, 128.1, 121.7, 118.4, 115.7, 113.4, 84.3, 73.2, 56.8, 3.7; m.p. 107.2–111.2  $^\circ\text{C}$ ; AMM  $m/z$  calcd for  $\text{C}_{18}\text{H}_{14}\text{NO}_2^+$  ( $\text{M} + \text{H}$ ) $^+$  276.1019, found 276.1017.

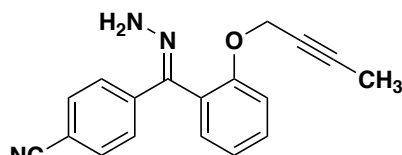

**(E)-4-((2-(but-2-yn-1-yloxy)phenyl)(hydrazineylidene)methyl)benzotrile (2e)**

Following general procedure B, **1e** (47.8mg, 0.17 mmol) was dissolved in anhydrous EtOH (1.7 mL), and  $\text{N}_2\text{H}_4$  (32  $\mu\text{L}$ , 1.0 mmol) and AcOH (12  $\mu\text{L}$ , 0.21 mmol) were added. The crude product was purified by flash column chromatography (75:25 hexanes:ethyl acetate) to afford a yellow oil (30.8 mg, 65%):  $^1\text{H}$  NMR (400 MHz, Chloroform- $d$ )  $\delta$  7.65 – 7.54 (m, 4H), 7.51 (tt,  $J = 8.7, 2.5$  Hz, 1H), 7.25 (d,  $J = 8.4$  Hz, 1H), 7.21 – 7.12 (m, 2H), 5.70 (s, 2H), 4.65 (q,  $J = 2.4$  Hz, 2H), 1.82 (t,  $J = 2.3$  Hz, 3H);  $^{13}\text{C}$  NMR (151 MHz,  $\text{CDCl}_3$ )  $\delta$  155.0, 144.1, 142.7, 132.0, 131.0, 130.4, 126.4, 122.4, 120.9, 119.4, 113.9, 110.7, 84.2, 73.7, 56.7, 3.8; AMM  $m/z$  calcd for  $\text{C}_{18}\text{H}_{16}\text{N}_3\text{O}^+$  ( $\text{M} + \text{H}$ ) $^+$  290.1288, found 290.1288.

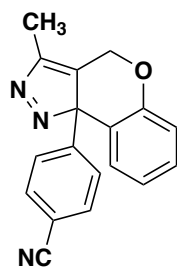

**4-(3-methylchromeno[4,3-c]pyrazol-9b(4H)-yl)benzotrile (3e)**

Following general procedure C, to a solution of hydrazone **2e** (25.2 mg, 0.09 mmol) in anhydrous  $\text{CH}_2\text{Cl}_2$  (8.7 mL) was added  $\text{MnO}_2$  (76 mg, 0.87 mmol). The crude residue was purified by column

chromatography (80:20 hexanes:EtOAc) to afford the desired pyrazole as a yellow oil (17 mg, 68%):  $^1\text{H}$  NMR (600 MHz, Chloroform-*d*)  $\delta$  7.82 (d,  $J$  = 7.9 Hz, 1H), 7.70 – 7.47 (m, 2H), 7.42 – 7.18 (m, 1H), 7.17 – 7.04 (m, 1H), 7.03 – 6.94 (m, 3H), 5.05 (d,  $J$  = 13.6 Hz, 1H), 4.79 (d,  $J$  = 13.7 Hz, 1H), 2.52 (d,  $J$  = 10.9 Hz, 3H);  $^{13}\text{C}$  NMR (201 MHz,  $\text{CDCl}_3$ )  $\delta$  173.6, 160.9, 133.1, 132.8, 131.3, 128.3, 123.7, 123.5, 122.6, 118.2, 114.7, 111.7, 73.7, 72.7, 29.9, 12.7; AMM  $m/z$  calcd for  $\text{C}_{18}\text{H}_{14}\text{N}_3\text{O}^+$  ( $\text{M} + \text{H}$ ) $^+$  288.1131, found 288.1132.

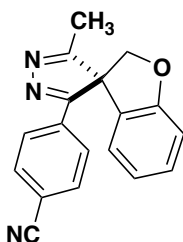

**(*R*)-4-(3'-methyl-2*H*-spiro[benzofuran-3,4'-pyrazol]-5'-yl)benzonitrile (4e)**

Following general procedure D, pyrazole **3e** (48.5 mg, 0.17 mmol) was dissolved in  $\text{CH}_3\text{CN}$  (1.7 mL). The solution was concentrated *in vacuo* and the crude residue was purified by column chromatography (90:10, hexanes:EtOAc) to an oil (30.2 mg, 65%):  $^1\text{H}$  NMR (800 MHz, Chloroform-*d*)  $\delta$  7.88 – 7.83 (m, 2H), 7.68 – 7.63 (m, 2H), 7.36 (ddd,  $J$  = 8.4, 7.4, 1.3 Hz, 1H), 7.11 (dt,  $J$  = 8.2, 0.7 Hz, 1H), 6.93 (td,  $J$  = 7.5, 1.0 Hz, 1H), 6.73 (dd,  $J$  = 7.6, 1.3 Hz, 1H), 4.78 – 4.70 (m, 2H), 2.22 (s, 3H);  $^{13}\text{C}$  NMR (201 MHz,  $\text{CDCl}_3$ )  $\delta$  173.5, 160.7, 132.9, 132.7, 131.2, 128.1, 123.5, 123.4, 122.5, 118.1, 114.6, 111.5, 73.6, 72.6, 29.7, 12.5; AMM  $m/z$  calcd for  $\text{C}_{18}\text{H}_{14}\text{N}_3\text{O}^+$  ( $\text{M} + \text{H}$ ) $^+$  288.1131, found 288.1129.

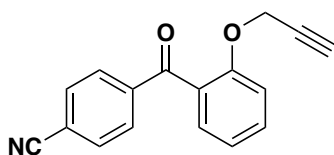

**4-(2-(prop-2-yn-1-yloxy)benzoyl)benzonitrile (1f)**

Following general procedure A, ketone **6** (98.9 mg, 0.44 mmol) was dissolved in  $\text{CH}_3\text{CN}$  (4.4 mL) followed by the addition of  $\text{Cs}_2\text{CO}_3$  (433 mg, 1.32 mmol) and propargyl bromide (128 mg, 1.1 mmol). The crude residue was purified by column chromatography (80:20 hexanes:EtOAc) to afford a white solid (100.2 mg, 86 %, m.p. 110.4-114.3 °C):  $^1\text{H}$  NMR (400 MHz, Chloroform-*d*)  $\delta$  7.93 – 7.86 (m, 2H), 7.79 – 7.71 (m, 2H), 7.57 (ddd,  $J$  = 8.3, 7.4, 1.8 Hz, 1H), 7.51 (dd,  $J$  = 7.6, 1.7 Hz, 1H), 7.23 – 7.12 (m, 2H), 4.60 (d,  $J$  = 2.4 Hz, 2H), 2.48 (t,  $J$  = 2.4 Hz, 1H);  $^{13}\text{C}$  NMR (201 MHz,  $\text{CDCl}_3$ )  $\delta$  194.7, 155.3, 141.3, 133.0, 132.1, 130.4, 129.9, 128.1, 121.9, 118.2, 115.8, 113.1, 77.5, 76.1, 55.9; AMM  $m/z$  calcd for  $\text{C}_{17}\text{H}_{12}\text{NO}_2^+$  ( $\text{M} + \text{H}$ ) $^+$  262.0863, found 262.0221.

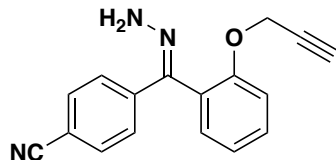

**(E)-4-(hydrazineylidene(2-(prop-2-yn-1-yloxy)phenyl)methyl)benzonitrile (2f)**

Following general procedure B, **1f** (43.6 mg, 0.17 mmol) was dissolved in anhydrous EtOH (1.6 mL), and N<sub>2</sub>H<sub>4</sub> (31 μL, 1.0 mmol) and AcOH (11 μL, 0.20 mmol) were added. The crude product was purified by flash column chromatography (80:20 hexanes:ethyl acetate) to afford an oil (32.9 mg, 72%): <sup>1</sup>H NMR (400 MHz, Chloroform-*d*) δ 7.58 – 7.44 (m, 6H), 7.27 – 7.12 (m, 4H), 5.68 (s, 2H), 4.67 (d, *J* = 2.4 Hz, 2H), 2.45 (t, *J* = 2.4 Hz, 1H). AMM *m/z* calcd for C<sub>17</sub>H<sub>14</sub>N<sub>3</sub>O<sup>+</sup> (M + H)<sup>+</sup> 276.1131, found 276.1130.

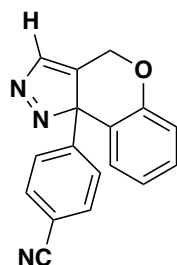

**4-(chromeno[4,3-c]pyrazol-9b(4H)-yl)benzonitrile (3f)**

Following general procedure C, to a solution of hydrazone **2f** (28.5 mg, 0.10 mmol) in anhydrous CH<sub>2</sub>Cl<sub>2</sub> (1.0 mL) was added MnO<sub>2</sub> (86.9 mg, 1.0 mmol). The crude residue was purified by column chromatography (80:20 hexanes:EtOAc) to afford the desired pyrazole as a clear oil (19.9 mg, 73%): <sup>1</sup>H NMR (400 MHz, Chloroform-*d*) δ 7.88 – 7.81 (m, 1H), 7.73 – 7.68 (m, 1H), 7.61 – 7.57 (m, 2H), 7.32 (ddd, *J* = 8.3, 7.3, 1.7 Hz, 1H), 7.09 (td, *J* = 7.6, 1.3 Hz, 1H), 7.02 – 6.94 (m, 3H), 5.19 (dd, *J* = 14.0, 0.7 Hz, 1H), 4.87 (dd, *J* = 14.0, 2.1 Hz, 1H); <sup>13</sup>C NMR (151 MHz, CDCl<sub>3</sub>) δ 153.5, 152.8, 139.3, 138.6, 132.9, 130.4, 129.6, 127.1, 122.1, 119.9, 118.1, 117.2, 112.8, 97.2, 61.4; AMM *m/z* calcd for C<sub>17</sub>H<sub>11</sub>N<sub>3</sub>O<sup>+</sup> (M)<sup>+</sup> 273.0902, found 273.6215.

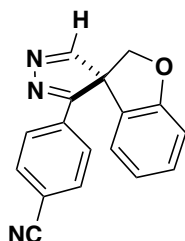

**(R)-4-(2H-spiro[benzofuran-3,4'-pyrazol]-3'-yl)benzonitrile (4f)**

Following general procedure D, pyrazole **3f** (11.3 mg, 0. mmol) was dissolved in CH<sub>3</sub>CN (0.7 mL). The solution was concentrated *in vacuo* and the crude residue was purified by column chromatography (60:40, hexanes:EtOAc) to a yellow oil (9.9 mg, 88%): <sup>1</sup>H NMR (400 MHz, Chloroform-*d*) δ 8.32 (s, 1H), 7.95 – 7.83 (m, 2H), 7.73 – 7.63 (m, 2H), 7.34 (ddd, *J* = 8.5, 7.5, 1.4 Hz, 1H), 7.08 (dd, *J* = 8.2, 0.9 Hz, 1H), 6.90 (td, *J* = 7.5, 1.0 Hz, 1H), 6.73 (dd, *J* = 7.6, 1.3 Hz, 1H), 4.91 (d, *J* = 10.1 Hz, 1H), 4.72 (d, *J* = 10.1 Hz, 1H); <sup>13</sup>C NMR (101 MHz, CDCl<sub>3</sub>) δ 160.9, 132.9, 132.7, 132.2, 131.5, 131.2, 128.8, 127.3, 123.8, 122.4, 121.1, 118.1, 115.2, 111.8, 71.6, 29.8, 0.1. AMM *m/z* calcd for C<sub>17</sub>H<sub>11</sub>N<sub>3</sub>O<sup>+</sup> (M)<sup>+</sup> 273.0902, found 273.6216.

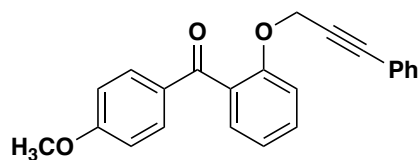

**(4-methoxyphenyl)(2-((3-phenylprop-2-yn-1-yl)oxy)phenyl)methanone (1g)**

Following general procedure A, ketone **7** (83.0 mg, 0.36 mmol) was dissolved in CH<sub>3</sub>CN (3.6 mL) followed by the addition of Cs<sub>2</sub>CO<sub>3</sub> (364 mg, 1.12 mmol) and bromide **8** (109.2 mg, 0.56 mmol). The crude residue was purified by column chromatography (80:20 hexanes:EtOAc) to afford the desired ketone as a yellow oil (106.9 mg, 86%): <sup>1</sup>H NMR (400 MHz, Chloroform-*d*) δ 7.92 – 7.75 (m, 2H), 7.37 (dd, *J* = 7.7, 1.8 Hz, 3H), 7.34 – 7.27 (m, 4H), 6.96 – 6.80 (m, 2H), 4.85 (s, 2H), 3.84 (s, 3H); <sup>13</sup>C NMR (101 MHz, CDCl<sub>3</sub>) δ 195.0, 163.7, 155.3, 132.5, 131.9, 131.4, 130.8, 130.3, 129.6, 128.9, 128.8, 128.4, 122.4, 121.6, 113.7, 113.6, 87.5, 83.8, 57.3, 55.6; AMM *m/z* calcd for C<sub>23</sub>H<sub>19</sub>O<sub>3</sub><sup>+</sup> (*M* + *H*)<sup>+</sup> 343.1329, found 343.0499.

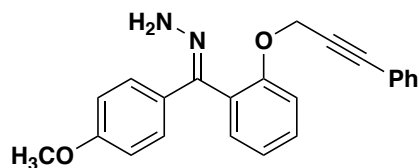

**(*E*)-((4-methoxyphenyl)(2-((3-phenylprop-2-yn-1-yl)oxy)phenyl)methylene)hydrazine (2g)**

Following general procedure B, **1g** (35.7 mg, 0.11 mmol) was dissolved in anhydrous EtOH (1.1 mL), and N<sub>2</sub>H<sub>4</sub> (21 μL, 0.66 mmol) and AcOH (7.5 μL, 0.13 mmol) were added. The crude product was purified by flash column chromatography (75:25 hexanes:ethyl acetate) to afford a yellow oil (25.7 mg, 65%): <sup>1</sup>H NMR (400 MHz, Chloroform-*d*) δ 7.51 – 7.40 (m, 3H), 7.36 (dd, *J* = 7.6, 1.9 Hz, 2H), 7.33 – 7.26 (m, 4H), 7.15 (d, *J* = 4.4 Hz, 2H), 6.84 – 6.75 (m, 2H), 5.35 (s, 2H), 4.91 (s, 2H), 3.78 (s, 3H). AMM *m/z* calcd for C<sub>23</sub>H<sub>21</sub>N<sub>2</sub>O<sub>2</sub><sup>+</sup> (*M* + *H*)<sup>+</sup> 357.1598, found 357.1595.

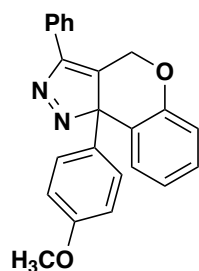

**9b-(4-methoxyphenyl)-3-phenyl-4,9b-dihydrochromeno[4,3-*c*]pyrazole (3g)**

Following general procedure C, to a solution of hydrazone **2g** (37.5 mg, 0.11 mmol) in anhydrous CH<sub>2</sub>Cl<sub>2</sub> (1.1 mL) was added MnO<sub>2</sub> (91.3 mg, 1.1 mmol). The crude residue was purified by column chromatography (80:20 hexanes:EtOAc) to afford a clear oil (24.5 mg, 66%): <sup>1</sup>H NMR (600 MHz, Chloroform-*d*) δ 7.95 (dd, *J* = 7.7, 1.7 Hz, 1H), 7.91 – 7.75 (m, 2H), 7.56 – 7.50 (m, 2H), 7.49 – 7.44 (m, 1H), 7.29 – 7.26 (m, 1H), 7.09 (td, *J* = 7.6, 1.2 Hz, 1H), 6.97 (dd, *J* = 8.3, 1.1 Hz, 1H), 6.87 – 6.82 (m, 2H), 6.82 – 6.78 (m, 2H), 5.32 (d, *J* = 14.7 Hz, 1H), 5.16 (d, *J* = 14.7 Hz, 1H), 3.76 (s, 3H); <sup>13</sup>C NMR (151 MHz, CDCl<sub>3</sub>) δ 160.0, 153.3, 149.6, 144.5, 130.5, 129.8, 129.6, 129.2,

129.1, 128.5, 127.7, 126.1, 122.3, 121.9, 117.1, 114.6, 100.3, 62.9, 55.4; AMM  $m/z$  calcd for  $C_{23}H_{19}N_2O_2^+$  ( $M + H$ )<sup>+</sup> 355.1441, found 355.1441.

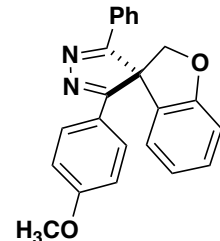

**(R)-3'-(4-methoxyphenyl)-5'-phenyl-2H-spiro[benzofuran-3,4'-pyrazole] (4g)**

Following general procedure D, crude pyrazole **3g** (41.2 mg, 0.12 mmol) was dissolved in  $CH_3CN$  (1.2 mL). The solution was concentrated *in vacuo* and the crude residue was purified by column chromatography (80:20, hexanes:EtOAc) to afford an amorphous white solid (21.6 mg, 51%):  $^1H$  NMR (400 MHz, Chloroform-*d*)  $\delta$  7.79 – 7.70 (m, 4H), 7.45 – 7.29 (m, 4H), 7.12 (d,  $J = 8.1$  Hz, 1H), 6.88 – 6.83 (m, 3H), 6.80 (td,  $J = 7.6, 1.3$  Hz, 2H), 4.93 (q,  $J = 2.3$  Hz, 2H), 3.81 (s, 3H);  $^{13}C$  NMR (201 MHz,  $CDCl_3$ )  $\delta$  175.6, 175.1, 162.2, 160.6, 131.2, 130.8, 129.8, 129.2, 129.1, 129.1, 127.9, 126.6, 124.0, 122.3, 121.5, 114.6, 111.2, 76.1, 70.7, 55.5; AMM  $m/z$  calcd for  $C_{23}H_{19}N_2O_2^+$  ( $M + H$ )<sup>+</sup> 355.1441, found 355.1441.

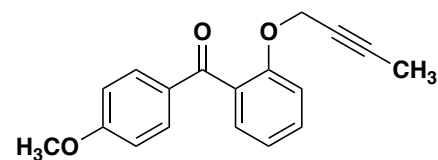

**(2-(but-2-yn-1-yloxy)phenyl)(4-methoxyphenyl)methanone (1h)**

Following general procedure A, ketone **7** (138.8 mg, 0.59 mmol) was dissolved in  $CH_3CN$  (5.9 mL) followed by the addition of  $Cs_2CO_3$  (573 mg, 1.76 mmol) and bromide **9** (66  $\mu L$ , 0.76 mmol). The crude residue was purified by column chromatography (84:16 hexanes:EtOAc) to afford the desired ketone (160 mg, 97%) as an amorphous yellow solid:  $^1H$  NMR (400 MHz, Chloroform-*d*)  $\delta$  7.85 – 7.75 (m, 2H), 7.45 (ddd,  $J = 8.3, 7.4, 1.8$  Hz, 1H), 7.34 (dd,  $J = 7.5, 1.7$  Hz, 1H), 7.14 (dd,  $J = 8.4, 0.9$  Hz, 1H), 7.07 (td,  $J = 7.4, 1.0$  Hz, 1H), 6.95 – 6.81 (m, 2H), 4.58 (q,  $J = 2.3$  Hz, 2H), 3.87 (s, 3H), 1.80 (t,  $J = 2.3$  Hz, 3H);  $^{13}C$  NMR (101 MHz,  $CDCl_3$ )  $\delta$  195.0, 163.7, 155.4, 132.5, 131.4, 130.8, 130.1, 129.5, 121.3, 113.6, 113.6, 84.0, 74.0, 57.1, 55.6, 3.8; AMM  $m/z$  calcd for  $C_{18}H_{17}O_2^+$  ( $M + H$ )<sup>+</sup> 281.1172, found 281.1170.

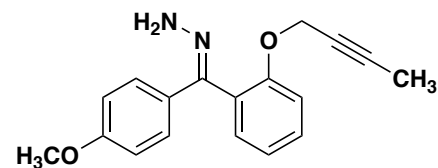

**(E)-((2-(but-2-yn-1-yloxy)phenyl)(4-methoxyphenyl)methylene)hydrazine (2h)**

Following general procedure B, **1h** (80.0 mg, 0.29 mmol) was dissolved in anhydrous EtOH (2.8 mL), and  $N_2H_4$  (54  $\mu L$ , 1.71 mmol) and AcOH (19.6  $\mu L$ , 0.34 mmol) were added. The crude product was purified by flash column chromatography (80:20 hexanes:ethyl acetate) to afford an oil (61.4 mg, 73%):  $^1H$  NMR (600 MHz, Chloroform-*d*)  $\delta$  7.37 (dt,  $J = 10.6, 6.0$  Hz, 3H), 7.14 (d,  $J = 8.3$  Hz, 1H), 7.06 (q,  $J = 4.1, 3.6$  Hz, 2H), 6.75 (t,  $J = 5.7$  Hz, 2H), 5.28 (s, 2H), 4.65 – 4.51 (m, 2H), 3.83 – 3.60 (m, 2H), 1.80 – 1.68 (m, 3H);  $^{13}C$  NMR (151 MHz,  $CDCl_3$ )  $\delta$  159.6, 154.8,

147.2, 131.3, 130.4, 130.3, 127.6, 122.7, 122.2, 113.9, 113.5, 83.9, 74.0, 56.8, 55.3, 3.7. AMM  $m/z$  calcd for  $C_{18}H_{18}N_2O_2Na^+$  ( $M + Na$ )<sup>+</sup> 315.1110, found 315.1113.

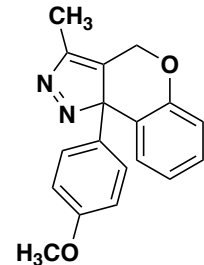

**9b-(4-methoxyphenyl)-3-methyl-4,9b-dihydrochromeno[4,3-c]pyrazole (3h)**

Following general procedure C, to a solution of hydrazone **2h** (31.9 mg, 0.11 mmol) in anhydrous  $CH_2Cl_2$  (1.1 mL) was added  $MnO_2$  (93.9 mg, 1.1 mmol). The crude residue was purified by column chromatography (80:20 hexanes:EtOAc) to afford the desired pyrazole as an oil (27.7 mg, 87%):  $^1H$  NMR (600 MHz, Chloroform- $d$ )  $\delta$  7.86 (dd,  $J = 7.7, 1.7$  Hz, 1H), 7.29 – 7.21 (m, 1H), 7.03 (td,  $J = 7.6, 1.2$  Hz, 1H), 6.94 (dd,  $J = 8.3, 1.1$  Hz, 1H), 6.78 (q,  $J = 9.0$  Hz, 4H), 5.01 (d,  $J = 13.2$  Hz, 1H), 4.82 (dq,  $J = 13.2, 1.7$  Hz, 1H), 3.75 (s, 3H), 2.48 (d,  $J = 1.5$  Hz, 3H);  $^{13}C$  NMR (151 MHz,  $CDCl_3$ )  $\delta$  159.8, 153.4, 147.9, 144.4, 129.8, 129.7, 127.6, 126.4, 121.7, 121.3, 116.9, 114.5, 98.8, 61.3, 55.4, 11.8; AMM  $m/z$  calcd for  $C_{18}H_{17}N_2O_2^+$  ( $M + H$ )<sup>+</sup> 293.1285, found 293.1284.

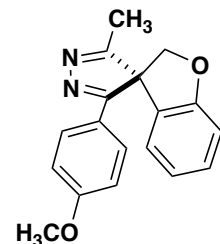

**(R)-3'-(4-methoxyphenyl)-5'-methyl-2H-spiro[benzofuran-3,4'-pyrazole] (4h)**

Following general procedure D, pyrazole **3h** (19.9 mg, 0.068 mmol) was dissolved in  $CH_3CN$  (0.68 mL). The solution was concentrated *in vacuo* and the crude residue was purified by column chromatography (80:20, hexanes:EtOAc) to afford the desired spirocycle as an amorphous white solid (14.9 mg, 75%):  $^1H$  NMR (600 MHz, Chloroform- $d$ )  $\delta$  7.71 – 7.64 (m, 2H), 7.29 (td,  $J = 7.7, 1.5$  Hz, 1H), 7.04 (d,  $J = 8.2$  Hz, 1H), 6.87 (tt,  $J = 7.6, 1.4$  Hz, 1H), 6.84 (dd,  $J = 8.9, 1.7$  Hz, 2H), 6.73 (dt,  $J = 7.5, 1.5$  Hz, 1H), 4.75 (dd,  $J = 9.9, 1.7$  Hz, 1H), 4.67 (dd,  $J = 9.8, 1.7$  Hz, 1H), 3.79 (d,  $J = 1.7$  Hz, 3H), 2.13 (d,  $J = 1.6$  Hz, 3H);  $^{13}C$  NMR (151 MHz,  $CDCl_3$ )  $\delta$  176.7, 174.5, 162.1, 160.8, 130.7, 129.6, 124.9, 123.7, 122.2, 121.7, 114.5, 111.2, 74.7, 72.3, 55.5, 12.5; AMM  $m/z$  calcd for  $C_{18}H_{17}N_2O_2^+$  ( $M + H$ )<sup>+</sup> 293.1285, found 293.1284.

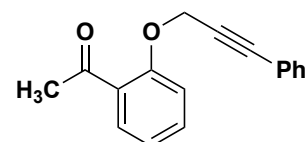

**1-(2-((3-phenylprop-2-yn-1-yl)oxy)phenyl)ethan-1-one (1i)**

2'-Hydroxyacetophenone (0.75 mL, 7.3 mmol) was dissolved in  $CH_3CN$  (36 mL) followed by the addition of  $K_2CO_3$  (3.0 g, 20.2 mmol) and propargyl bromide (0.66  $\mu$ L, 1.1 mmol). The crude residue was purified by column chromatography (80:20 hexanes:EtOAc) to afford the alkylated

ketone (1.1 g, 92%) . To this ketone, (1.1 g, 6.3 mmol) was added to a 25 mL round bottom flask, followed by the addition of Pd(PPh<sub>3</sub>)Cl<sub>2</sub> (44 mg, 0.063 mmol) and CuI (12 mg, 0.063 mmol). The solids were dissolved in CH<sub>3</sub>CN (8 mL), followed by the addition iodobenzene (2 mL), and triethylamine (1.8 mL). The reactions mixture was stirred for 18 h at room temperature. The crude residue was purified by column chromatography (90:10 hexanes:EtOAc) to afford the desired ketone (1.38 g, 87%) as an amorphous white solid: <sup>1</sup>H NMR (400 MHz, Chloroform-*d*) δ 7.76 (dd, *J* = 7.7, 2.1 Hz, 1H), 7.49 (t, *J* = 7.8 Hz, 1H), 7.42 (d, *J* = 7.1 Hz, 2H), 7.38 – 7.28 (m, 3H), 7.16 (d, *J* = 8.4 Hz, 1H), 7.05 (t, *J* = 7.5 Hz, 1H), 5.03 (s, 2H), 2.68 (d, *J* = 1.3 Hz, 3H); <sup>13</sup>C NMR (101 MHz, CDCl<sub>3</sub>) δ 199.9, 157.2, 133.6, 131.9, 130.6, 129.2, 129.0, 128.5, 122.1, 121.6, 113.5, 87.9, 83.3, 57.3, 32.2; AMM *m/z* calcd for C<sub>17</sub>H<sub>15</sub>O<sub>2</sub><sup>+</sup> (M + H)<sup>+</sup> 251.1067, found 251.1063.

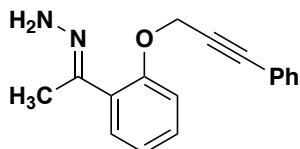

**(E)-1-(2-((3-phenylprop-2-yn-1-yl)oxy)phenyl)ethylidenehydrazine (2i)**

Ketone **1i** (0.157 g, 0.628 mmol) was dissolved in anhydrous EtOH (6.3 mL) and the solution was sparged with argon for 30 min, following the dropwise addition of N<sub>2</sub>H<sub>4</sub> (0.12 mL, 3.7 mmol). The reaction was then allowed to stir overnight at room temperature. The solution was diluted with diethyl ether (20 mL), washed with deionized H<sub>2</sub>O (10 mL), and extracted with diethyl ether (10 x 3 mL). The organic phase was dried over Na<sub>2</sub>SO<sub>4</sub> and concentrated *in vacuo* to afford a crude reaction mixture (0.152 g) which was carried to the next reaction without further purification: <sup>1</sup>H NMR (400 MHz, Chloroform-*d*) δ 7.40 (ddd, *J* = 17.7, 7.4, 1.9 Hz, 3H), 7.34 – 7.27 (m, 5H), 7.09 (d, *J* = 8.2 Hz, 1H), 7.00 (t, *J* = 7.5 Hz, 1H), 5.30 (s, 2H), 4.93 (s, 2H), 2.16 (t, *J* = 11.7 Hz, 3H).

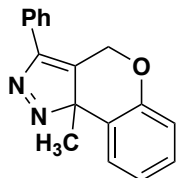

**9b-methyl-3-phenyl-4,9b-dihydrochromeno[4,3-c]pyrazole (3i)**

Following general procedure C, to a solution of hydrazone **2i** (0.1527 g, 0.578 mmol) in CH<sub>2</sub>Cl<sub>2</sub> (5.8 mL) was added MnO<sub>2</sub> (0.520 g, 5.78 mmol). Upon completion, the crude residue was purified by column chromatography (80:20 hexanes:EtOAc) afforded the desired pyrazole (0.122 g, 81%) as a white solid: <sup>1</sup>H NMR (400 MHz, Chloroform-*d*) δ 7.91 (d, *J* = 7.8 Hz, 1H), 7.80 (d, *J* = 7.6 Hz, 2H), 7.47 (dt, *J* = 26.0, 7.4 Hz, 3H), 7.22 – 7.10 (m, 1H), 7.02 (t, *J* = 7.5 Hz, 1H), 6.90 (d, *J* = 8.2 Hz, 1H), 5.36 (d, *J* = 3.8 Hz, 2H), 1.73 (s, 3H); <sup>13</sup>C NMR (101 MHz, CDCl<sub>3</sub>) δ 152.2, 149.0, 144.6, 130.6, 129.5, 129.2, 129.1, 128.4, 127.9, 127.5, 124.0, 122.0, 116.9, 94.6, 62.8, 24.3; AMM *m/z* calcd for C<sub>17</sub>H<sub>15</sub>N<sub>2</sub>O<sup>+</sup> (M + H)<sup>+</sup> 263.1179, found 263.1178.

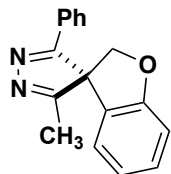

**(S)-3'-methyl-5'-phenyl-2H-spiro[benzofuran-3,4'-pyrazole] (4i)**

Following general procedure D, pyrazole **3i** (0.054 g, 0.20 mmol) was dissolved in CH<sub>3</sub>CN (10 mL). Upon completion of the reaction, the crude residue was purified by column chromatography (80:20, hexanes:EtOAc) to afford **4i** (0.037 g, 69%) as a white solid: <sup>1</sup>H NMR (400 MHz, Chloroform-*d*) δ 7.80 – 7.71 (m, 2H), 7.43 (t, *J* = 7.4 Hz, 1H), 7.40 – 7.30 (m, 3H), 7.08 (d, *J* = 8.3 Hz, 1H), 6.97 – 6.88 (m, 1H), 6.76 (dd, *J* = 7.8, 1.4 Hz, 1H), 4.80 (d, *J* = 9.9 Hz, 1H), 4.70 (d, *J* = 9.9 Hz, 1H), 2.18 (s, 3H); <sup>13</sup>C NMR (101 MHz, CDCl<sub>3</sub>) δ 177.7, 174.9, 160.9, 131.4, 130.8, 129.1, 127.9, 124.6, 123.6, 122.3, 111.3, 74.4, 72.6, 12.5; m.p. 177.2-178.2 °C; AMM *m/z* calcd for C<sub>17</sub>H<sub>15</sub>N<sub>2</sub>O<sup>+</sup> (M + H)<sup>+</sup> 263.1179, found 263.1179.

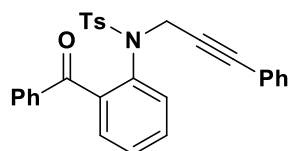

**N-(2-benzoylphenyl)-4-methyl-N-(3-phenylprop-2-yn-1-yl)benzenesulfonamide (1j)**

Following general procedure A, ketone **12** (0.840 g, 2.39 mmol) was dissolved in CH<sub>3</sub>CN (24 mL), followed by the addition of Cs<sub>2</sub>CO<sub>3</sub> (2.3 g, 7.17 mmol) and bromide **8** (0.32 mL, 3.59 mmol). The crude residue was purified by column chromatography (80:20 hexanes:EtOAc) to afford the desired ketone (0.903 g, 81%) as a yellow solid: <sup>1</sup>H NMR (600 MHz, Chloroform-*d*) δ 7.78 (d, *J* = 7.8 Hz, 2H), 7.59 (d, *J* = 8.4 Hz, 2H), 7.56 (d, *J* = 6.9 Hz, 1H), 7.43 (t, *J* = 7.7 Hz, 7H), 7.31 – 7.27 (m, 2H), 7.21 (d, *J* = 7.7 Hz, 2H), 7.09 (d, *J* = 8.0 Hz, 2H), 5.00 – 4.56 (m, 2H), 2.29 (s, 3H); <sup>13</sup>C NMR (151 MHz, CDCl<sub>3</sub>) δ 195.7, 143.6, 141.0, 137.5, 137.2, 136.7, 133.2, 131.6, 131.3, 130.8, 130.8, 130.5, 129.8, 129.3, 129.2, 128.5, 128.5, 128.4, 128.3, 128.3, 128.3, 128.3, 128.1, 128.0, 85.8, 84.3, 43.0, 21.6; AMM *m/z* calcd for C<sub>29</sub>H<sub>24</sub>NO<sub>3</sub>S<sup>+</sup> (M + H)<sup>+</sup> 466.1471, found 466.1465.

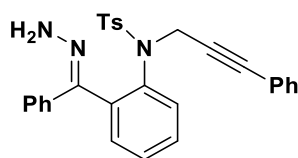

**(E)-N-(2-(hydrazineylidene(phenyl)methyl)phenyl)-4-methyl-N-(3-phenylprop-2-yn-1-yl)benzenesulfonamide (2j)**

Following a modified general procedure B, **1j** (156 mg, 0.33 mmol) was dissolved in anhydrous EtOH (3.3 mL), and N<sub>2</sub>H<sub>4</sub> (31 μL, 1.0 mmol) and AcOH (23 μL, 0.4 mmol) were added. The solution was then heated in the microwave reactor to 160 °C for 1 hour. After standard work-up, the crude material was used purified by flash column chromatography (80:20 to 70:30 Hexanes:EtOAc) to afford **2j** (52%) as an oil: <sup>1</sup>H NMR (400 MHz, Chloroform-*d*) δ 7.85 – 7.79 (m, 2H), 7.66 – 7.53 (m, 3H), 7.51 – 7.38 (m, 7H), 7.33 – 7.30 (m, 2H), 7.26 – 7.22 (m, 2H), 7.12 (d, *J* = 8.0 Hz, 2H), 4.79 (s, 2H), 2.32 (s, 3H); AMM *m/z* calcd for C<sub>29</sub>H<sub>26</sub>N<sub>3</sub>O<sub>2</sub>S<sup>+</sup> (M + H)<sup>+</sup> 480.1740, found 480.1746.



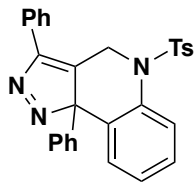

### 3,9b-diphenyl-5-tosyl-5,9b-dihydro-4H-pyrazolo[4,3-c]quinoline (**3j**)

Following general procedure C, to a solution of hydrazone **2j** (45.3 mg, 0.09 mmol) in CH<sub>2</sub>Cl<sub>2</sub> (0.9 mL) was added MnO<sub>2</sub> (78 mg, 0.9 mmol). The crude concentrate was purified by column chromatography (80:20 hexanes:EtOAc) to afford the product (32.5 mg, 89%) as a yellow oil: <sup>1</sup>H NMR (400 MHz, Chloroform-*d*) δ 8.01 (d, *J* = 7.6 Hz, 1H), 7.92 (dd, *J* = 14.7, 7.9 Hz, 3H), 7.61 – 7.44 (m, 4H), 7.43 – 7.31 (m, 3H), 7.10 (ddd, *J* = 27.7, 20.2, 8.0 Hz, 5H), 6.88 (d, *J* = 8.0 Hz, 2H), 6.76 (d, *J* = 7.9 Hz, 2H), 5.17 (d, *J* = 17.0 Hz, 1H), 5.03 (d, *J* = 17.0 Hz, 1H), 2.31 (s, 3H); <sup>13</sup>C NMR (101 MHz, CDCl<sub>3</sub>) δ 150.4, 143.9, 142.1, 135.9, 135.1, 133.0, 130.2, 130.0, 129.7, 129.7, 129.7, 129.3, 129.2, 129.2, 128.6, 128.5, 128.4, 128.2, 127.9, 127.4, 127.2, 126.4, 125.5, 123.5, 102.2, 44.5, 21.7; AMM *m/z* calcd for C<sub>29</sub>H<sub>24</sub>N<sub>3</sub>O<sub>2</sub>S<sup>+</sup> (M + H)<sup>+</sup> 478.1584, found 478.1575.

\* It should be noted that some of the cycloaddition product had undergone sigmatropic shift, giving the rearrangement product.

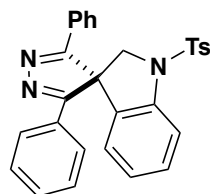

### 3',5'-diphenyl-1-tosylspiro[indoline-3,4'-pyrazole] (**4j**)

**3j** (16.6 mg, 0.05 mmol) was dissolved in CH<sub>3</sub>CN (0.5 mL) and heated at reflux for 27 hours. The reaction was 93% converted to product. The crude reaction mixture was concentrated *in vacuo* and purified by column chromatography (80:20 Hexanes:EtOAc) to afford **4j** (6.0 mg, 11% over two steps from 51.0 mg **2j**): <sup>1</sup>H NMR (400 MHz, Chloroform-*d*) δ 8.00 – 7.94 (m, 1H), 7.85 – 7.79 (m, 2H), 7.53 – 7.46 (m, 4H), 7.41 (tt, *J* = 7.5, 1.3 Hz, 1H), 7.38 – 7.30 (m, 3H), 7.18 – 7.08 (m, 5H), 6.93 (td, *J* = 7.6, 1.0 Hz, 1H), 6.69 (dd, *J* = 7.7, 1.2 Hz, 1H), 4.31 (s, 2H), 2.49 (s, 3H); <sup>13</sup>C NMR (151 MHz, CDCl<sub>3</sub>) δ 134.7, 134.4, 132.2, 131.2, 129.8, 129.4, 129.3, 129.0, 128.8, 128.6, 128.5, 128.4, 128.3, 128.2, 128.2, 127.4, 127.3, 126.2, 126.1, 117.2, 115.7, 48.2, 29.9, 26.8, 21.7; AMM *m/z* calcd for C<sub>29</sub>H<sub>23</sub>N<sub>3</sub>O<sub>2</sub>SN<sup>+</sup> (M + Na)<sup>+</sup> 500.1409, found 500.1408.

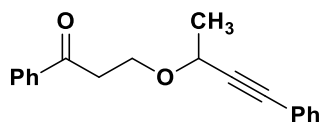

### 1-phenyl-3-((4-phenylbut-3-yn-2-yl)oxy)propan-1-one (**13**)

To 1-phenylprop-2-en-1-one (448 mg, 3.4 mmol) in CH<sub>2</sub>Cl<sub>2</sub> (11.3 mL), *p*-toluenesulfonic acid monohydrate (645 mg, 3.4 mmol) was added. 4-phenylbut-3-yn-2-ol (541 mg, 3.7 mL) was added dropwise and the solution was allowed to stir at room temperature until completion. The reaction was then quenched with saturated sodium bicarbonate, extracted with CH<sub>2</sub>Cl<sub>2</sub>, and washed with water. The organic extract was dried over Na<sub>2</sub>SO<sub>4</sub> and concentrated *in vacuo*. The crude mixture was purified by flash column chromatography (90:10 Hexanes:EtOAc) to afford **13** (147 mg, 15%): <sup>1</sup>H NMR (400 MHz, Chloroform-*d*) δ 8.07 – 7.87 (m, 2H), 7.60 – 7.52 (m, 1H), 7.49 – 7.39

(m, 4H), 7.34 – 7.27 (m, 3H), 4.46 (q,  $J = 6.6$  Hz, 1H), 4.31 – 4.13 (m, 1H), 4.05 – 3.86 (m, 1H), 3.32 (qt,  $J = 16.9, 6.6$  Hz, 2H), 1.51 (d,  $J = 6.6$  Hz, 3H);  $^{13}\text{C}$  NMR (101 MHz,  $\text{CDCl}_3$ )  $\delta$  198.4, 137.1, 133.9, 133.3, 131.9, 130.3, 128.8, 128.8, 128.7, 128.6, 128.4, 128.4, 128.3, 128.2, 89.1, 66.4, 64.3, 39.0, 22.3; AMM  $m/z$  calcd for  $\text{C}_{19}\text{H}_{19}\text{O}^+$  ( $\text{M} + \text{H}$ ) $^+$  279.1380, found 279.1379.

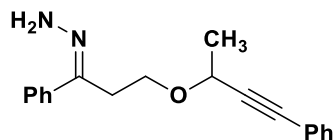

**(Z)-1-phenyl-3-((4-phenylbut-3-yn-2-yl)oxy)propylidenehydrazine (14)**

Following general procedure B, **13** (147 mg, 0.5 mmol) was dissolved in anhydrous EtOH (5.0 mL) and sparged.  $\text{N}_2\text{H}_4$  (94  $\mu\text{L}$ , 3.0 mmol) and AcOH (34  $\mu\text{L}$ , 0.6 mmol) were added. The crude product was purified by flash column chromatography (80:20 hexanes:ethyl acetate) to afford an oil (91 mg, 62%):  $^1\text{H}$  NMR (400 MHz, Chloroform- $d$ )  $\delta$  7.70 – 7.65 (m, 2H), 7.37 – 7.29 (m, 8H), 5.86 (s, 2H), 4.38 (q,  $J = 6.4$  Hz, 1H), 4.12 (dt,  $J = 9.1, 5.9$  Hz, 1H), 3.79 – 3.65 (m, 1H), 3.13 – 2.90 (m, 2H), 1.49 (t,  $J = 6.2$  Hz, 3H); AMM  $m/z$  calcd for  $\text{C}_{19}\text{H}_{21}\text{N}_2\text{O}^+$  ( $\text{M} + \text{H}$ ) $^+$  293.1648, found 293.1649.

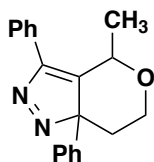

**4-methyl-3,7a-diphenyl-4,6,7,7a-tetrahydropyrano[4,3-c]pyrazole (16)**

Following general procedure C, to a solution of hydrazone **14** (73 mg, 0.24 mmol) in anhydrous  $\text{CH}_2\text{Cl}_2$  (2.4 mL) was added  $\text{MnO}_2$  (209 mg, 2.4 mmol). The crude residue was purified by column chromatography (80:20 Hexanes:EtOAc) to afford **16** as a 91:9 mixture of diastereomers (51 mg, 71%):  $^1\text{H}$  NMR (400 MHz, Chloroform- $d$ )  $\delta$  7.62 (d,  $J = 6.1$  Hz, 2H), 7.49 – 7.30 (m, 8H), 4.51 (tt,  $J = 6.7, 4.0$  Hz, 1H), 3.94 (dt,  $J = 12.0, 7.0$  Hz, 1H), 3.52 (t,  $J = 12.0$  Hz, 1H), 3.39 (d,  $J = 13.4$  Hz, 1H), 1.54 (dd,  $J = 8.2, 4.0$  Hz, 1H), 1.31 (dd,  $J = 6.5, 1.9$  Hz, 3H);  $^{13}\text{C}$  NMR (101 MHz,  $\text{CDCl}_3$ )  $\delta$  151.9, 148.7, 132.7, 132.2, 130.3, 129.4, 129.2, 128.8, 128.4, 128.3, 128.3, 127.6, 100.3, 71.0, 62.8, 39.0, 19.6; AMM  $m/z$  calcd for  $\text{C}_{19}\text{H}_{19}\text{N}_2\text{O}^+$  ( $\text{M} + \text{H}$ ) $^+$  291.1492, found 291.1491.

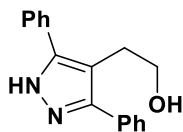

**2-(3,5-diphenyl-1H-pyrazol-4-yl)ethan-1-ol (19)**

Following general procedure D, **16** (29 mg, 0.1 mmol) was dissolved in  $\text{CH}_3\text{CN}$  (1 mL). After heating at reflux for 24 hours, only 50% conversion was seen. Purification by flash chromatography afforded **19** (5.0 mg, 20%):  $^1\text{H}$  NMR (400 MHz, Acetonitrile- $d_3$ )  $\delta$  11.18 (s, 1H), 7.65 (d,  $J = 7.6$  Hz, 4H), 7.49 (t,  $J = 7.5$  Hz, 4H), 7.41 (t,  $J = 7.4$  Hz, 2H), 3.46 (t,  $J = 7.4$  Hz, 2H), 2.94 (t,  $J = 7.3$  Hz, 2H), 2.68 (s, 1H); AMM  $m/z$  calcd for  $\text{C}_{17}\text{H}_{17}\text{N}_2\text{O}^+$  ( $\text{M} + \text{H}$ ) $^+$  265.1335, found 265.1333.  $^1\text{H}$  NMR spectrum is consistent with literature data.<sup>2</sup>

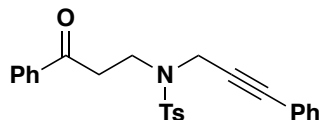

**4-methyl-*N*-(3-oxo-3-phenylpropyl)-*N*-(3-phenylprop-2-yn-1-yl)benzenesulfonamide (20)**

1-Phenylprop-2-en-1-one (0.694 g, 5.3 mmol) was added dropwise to a stirred solution of 4-methyl-*N*-(3-phenylprop-2-yn-1-yl)benzenesulfonamide (1.00 g, 3.5 mmol), TBAI (135 mg, 0.42 mmol), and Na<sub>2</sub>CO<sub>3</sub> (853 mg, 8.1 mmol) in toluene (7.0 mL) at 0 °C. The mixture was allowed to slowly warm to room temperature and stirred for 48 h. Saturated aqueous NH<sub>4</sub>Cl (6 mL), EtOAc (45 mL), and H<sub>2</sub>O (30 mL) were added. The phases were separated and the organic phase was washed with H<sub>2</sub>O (30 mL), dried over Na<sub>2</sub>SO<sub>4</sub>, filtered, and concentrated *in vacuo*. Purification by column chromatography (90:10 to 85:15, Hexanes:EtOAc) afforded the desired sulfonamide (0.922 g, 63%) as a white solid: <sup>1</sup>H NMR (400 MHz, Chloroform-*d*) δ 7.96 (d, *J* = 7.7 Hz, 2H), 7.81 (d, *J* = 7.8 Hz, 2H), 7.57 (t, *J* = 7.4 Hz, 1H), 7.46 (t, *J* = 7.6 Hz, 2H), 7.31 – 7.18 (m, 6H), 7.08 (d, *J* = 7.4 Hz, 2H), 4.43 (s, 2H), 3.69 (t, *J* = 7.0 Hz, 2H), 3.45 (t, *J* = 7.1 Hz, 2H), 2.35 (s, 3H); <sup>13</sup>C NMR (101 MHz, CDCl<sub>3</sub>) δ 198.3, 143.8, 136.6, 135.7, 133.6, 131.7, 129.7, 128.8, 128.6, 128.2, 128.2, 128.0, 122.2, 85.7, 82.4, 43.0, 39.2, 38.8, 21.6; AMM *m/z* calcd for C<sub>25</sub>H<sub>24</sub>NO<sub>3</sub>S<sup>+</sup> (M + H)<sup>+</sup> 418.1471, found 418.1470.

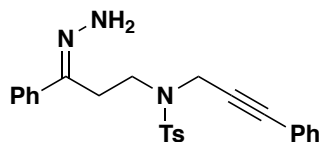

**(*E*)-*N*-(3-hydrazineylidene-3-phenylpropyl)-4-methyl-*N*-(3-phenylprop-2-yn-1-yl)benzenesulfonamide (21)**

Ketone **20** (169 mg, 0.4 mmol) was dissolved in anhydrous EtOH (4.0 mL), and the solution was sparged with argon for 30 min. N<sub>2</sub>H<sub>4</sub> (75 μL, 2.4 mmol) and AcOH (142 μL, 0.5 mmol) were added to solution dropwise. The reaction was then heated at 80 °C for 30 min. The solution was diluted with diethyl ether (10 mL), washed with deionized H<sub>2</sub>O (2 x 10 mL), extracted with diethyl ether (3 x 10 mL) and washed with Na<sub>2</sub>CO<sub>3</sub> (10 mL). The combined organic phases were dried over Na<sub>2</sub>SO<sub>4</sub> and concentrated *in vacuo*. The crude residue was purified by column chromatography (70:30 Hexanes:EtOAc) afforded the desired hydrazone (142 mg, 80%) as an amorphous white solid: <sup>1</sup>H NMR (400 MHz, Chloroform-*d*) δ 7.76 (d, *J* = 7.9 Hz, 2H), 7.66 (dd, *J* = 6.2, 3.1 Hz, 2H), 7.27 (d, *J* = 6.3 Hz, 8H), 7.14 (d, *J* = 7.5 Hz, 2H), 5.76 (s, 2H), 4.37 (s, 2H), 3.42 (dd, *J* = 10.2, 6.3 Hz, 2H), 3.10 (dd, *J* = 10.2, 6.3 Hz, 2H), 2.35 (s, 3H); <sup>13</sup>C NMR (101 MHz, CDCl<sub>3</sub>) δ 131.7, 129.9, 128.9, 128.6, 128.4, 128.3, 127.9, 125.3, 82.1, 42.8, 38.9, 26.2, 21.6; AMM *m/z* calcd for C<sub>25</sub>H<sub>25</sub>N<sub>3</sub>O<sub>3</sub>S (M)<sup>+</sup> 431.1667, found 431.1615.

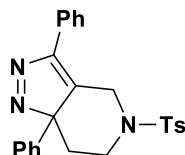

**3,7a-diphenyl-5-tosyl-5,6,7,7a-tetrahydro-4*H*-pyrazolo[4,3-*c*]pyridine (22)**

Following general procedure C, to a solution of hydrazone **21** (360 mg, 0.83 mmol) was dissolved in anhydrous CH<sub>2</sub>Cl<sub>2</sub> (8.3 mL) under argon followed by the addition of MnO<sub>2</sub> (750 mg, 1.62 mmol). The crude residue was purified by column chromatography (80:20 Hexanes:EtOAc) afforded the product (288 mg, 80%) as a yellow oil: <sup>1</sup>H NMR (599 MHz, Chloroform-*d*) δ 7.95 – 7.86 (m, 2H), 7.59 (t, *J* = 7.6 Hz, 2H), 7.55 – 7.51 (m, 1H), 7.48 – 7.42 (m, 2H), 7.33 (dddd, *J* = 7.9, 6.1, 4.7, 2.5 Hz, 3H), 7.23 – 7.16 (m, 2H), 7.11 (d, *J* = 7.8 Hz, 2H), 5.29 (dd, *J* = 13.8, 1.7 Hz, 1H), 3.93 (ddt, *J* = 13.2, 4.1, 2.0 Hz, 1H), 3.83 (d, *J* = 13.8 Hz, 1H), 3.23 (dt, *J* = 13.6, 2.4 Hz, 1H), 2.84 (td, *J* = 13.2, 2.2 Hz, 1H), 2.36 (s, 3H), 1.21 (td, *J* = 13.2, 4.1 Hz, 1H); <sup>13</sup>C NMR (151 MHz, CDCl<sub>3</sub>) δ 152.1, 143.9, 141.4, 135.0, 131.9, 130.3, 129.9, 129.8, 129.5, 129.3, 129.0, 128.7, 128.7, 127.5, 127.3, 100.3, 43.5, 41.7, 34.9, 21.7; AMM *m/z* calcd for C<sub>25</sub>H<sub>24</sub>N<sub>3</sub>O<sub>2</sub>S<sup>+</sup> (M + H)<sup>+</sup> 430.1584, found 430.1573.

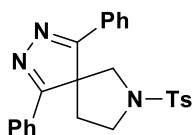

#### 1,4-diphenyl-7-tosyl-2,3,7-triazaspiro[4.4]nona-1,3-diene (**23**)

**22** (55.4 mg, 0.12 mmol) was dissolved in CH<sub>3</sub>CN (1.2 mL) and heated in a reaction microwave at 150 °C for 5 min. Using preparative thin layer chromatography (95:5 dichloromethane:methanol) to afford the desired pyrazole (**8.4**, 17%). The final product was observed as a white amorphous solid: <sup>1</sup>H NMR (599 MHz, Chloroform-*d*) δ 7.67 (d, *J* = 7.8 Hz, 2H), 7.38 (dd, *J* = 6.5, 2.9 Hz, 2H), 7.27 – 7.03 (m, 7H), 6.93 (d, *J* = 7.2 Hz, 2H), 5.65 (s, 2H), 3.75 (t, *J* = 6.4 Hz, 2H), 2.66 (t, *J* = 6.4 Hz, 2H), 2.37 (s, 4H); <sup>13</sup>C NMR (151 MHz, cdcl<sub>3</sub>) δ 144.5, 135.8, 134.6, 132.7, 130.0, 129.5, 128.6, 128.4, 128.1, 127.8, 127.4, 126.9, 62.2, 42.3, 21.7, 21.1; AMM *m/z* calcd for C<sub>25</sub>H<sub>24</sub>N<sub>3</sub>O<sub>2</sub>S<sup>+</sup> (M + H)<sup>+</sup> 430.1584, found 430.1575.

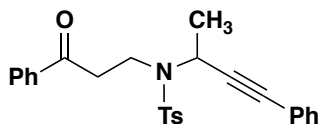

#### 4-methyl-*N*-(3-oxo-3-phenylpropyl)-*N*-(4-phenylbut-3-yn-2-yl)benzenesulfonamide (**24**)

To amine **30** (241 mg, 0.84 mmol) dissolved in THF (2.8 mL) was added Na<sub>2</sub>CO<sub>3</sub> (205 mg, 1.9 mmol) and TBAI (97 mg, 0.3 mmol). Vinyl ketone **11** (190 mg, 1.3 mmol) was added and the reaction was allowed to stir at room temperature for 3 days. The reaction was then quenched with saturated aqueous NH<sub>4</sub>Cl (2 mL) and extracted with EtOAc (3 x 10 mL), dried over NaSO<sub>4</sub>, filtered and concentrated *in vacuo*. The reaction was purified by flash column chromatography (90:10 Hexanes:EtOAc) to afford **24** (237 mg, 65%): <sup>1</sup>H NMR (400 MHz, Chloroform-*d*) δ 8.01 (d, *J* = 7.7 Hz, 2H), 7.83 (d, *J* = 7.9 Hz, 2H), 7.60 (t, *J* = 7.1 Hz, 1H), 7.49 (t, *J* = 7.6 Hz, 2H), 7.26 (dt, *J* = 20.6, 7.9 Hz, 5H), 7.14 – 7.03 (m, 2H), 5.11 (q, *J* = 7.0 Hz, 1H), 3.83 – 3.70 (m, 1H), 3.65 (dd, *J* = 9.1, 6.0 Hz, 2H), 3.46 – 3.35 (m, 1H), 2.37 (s, 3H), 1.54 (d, *J* = 7.0 Hz, 3H); <sup>13</sup>C NMR (101 MHz, CDCl<sub>3</sub>) δ 198.7, 143.7, 136.6, 135.5, 133.5, 131.6, 129.7, 128.8, 128.5, 128.2, 128.0, 122.2, 86.6, 84.9, 47.1, 41.2, 40.6, 22.2, 21.6; AMM *m/z* calcd for C<sub>26</sub>H<sub>26</sub>NO<sub>2</sub>S<sup>+</sup> (M + H)<sup>+</sup> 432.1628, found 432.1625.<sup>1</sup>

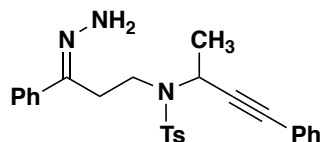

**(E)-N-(3-hydrazineylidene-3-phenylpropyl)-4-methyl-N-(4-phenylbut-3-yn-2-yl)benzenesulfonamide (25)**

Following general procedure B, ketone **24** (159 mg, 0.37 mmol) was dissolved in EtOH (3.7 mL), and  $\text{N}_2\text{H}_4$  (69  $\mu\text{L}$ , 2.2 mmol) and AcOH (25  $\mu\text{L}$ , 0.44 mmol) were added. The reaction was heated to 80 °C for 1 hour, then diluted with Et<sub>2</sub>O (5 mL), washed with H<sub>2</sub>O (5 mL), dried over NaSO<sub>4</sub>, filtered and concentrated *in vacuo*. The reaction was purified by flash column chromatography (80:20 Hexanes:EtOAc) to afford **25** (118 mg, 70%): <sup>1</sup>H NMR (400 MHz, Chloroform-*d*)  $\delta$  8.01 (d,  $J = 7.7$  Hz, 2H), 7.83 (d,  $J = 7.9$  Hz, 2H), 7.60 (t,  $J = 7.1$  Hz, 1H), 7.49 (t,  $J = 7.6$  Hz, 2H), 7.26 (dt,  $J = 20.6, 7.9$  Hz, 5H), 7.14 – 7.03 (m, 2H), 5.11 (q,  $J = 7.0$  Hz, 1H), 3.83 – 3.70 (m, 1H), 3.65 (dd,  $J = 9.1, 6.0$  Hz, 2H), 3.46 – 3.35 (m, 1H), 2.37 (s, 3H), 1.54 (d,  $J = 7.0$  Hz, 3H); AMM  $m/z$  calcd for C<sub>26</sub>H<sub>28</sub>N<sub>3</sub>O<sub>2</sub>S<sup>+</sup> (M + H)<sup>+</sup> 446.1897, found 446.1894.

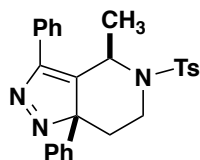

**(4*R*,7*aR*)-4-methyl-3,7*a*-diphenyl-5-tosyl-5,6,7,7*a*-tetrahydro-4*H*-pyrazolo[4,3-*c*]pyridine (26*a*)**

**(4*S*,7*aR*)-4-methyl-3,7*a*-diphenyl-5-tosyl-5,6,7,7*a*-tetrahydro-4*H*-pyrazolo[4,3-*c*]pyridine (26*b*)**

Following general procedure C, hydrazone **25** (33 mg, 0.07 mmol) was dissolved in CH<sub>2</sub>Cl<sub>2</sub> (0.7 mL) and MnO<sub>2</sub> (61 mg, 0.7 mmol) was added. The reaction was purified by flash column chromatography (75:25 Hexanes:EtOAc) to afford a 62:38 mixture of diastereomers **26a**:**26b** (67.4 mg, 88%).

**26a**: Isolated as a clear crystalline solid: m.p. 185.2-186.6 °C; <sup>1</sup>H NMR (599 MHz, Chloroform-*d*)  $\delta$  7.85 – 7.72 (m, 2H), 7.62 (t,  $J = 7.7$  Hz, 2H), 7.59 – 7.54 (m, 1H), 7.38 – 7.30 (m, 3H), 7.24 – 7.20 (m, 2H), 7.04 (dd,  $J = 6.8, 2.9$  Hz, 2H), 6.93 (d,  $J = 8.0$  Hz, 2H), 5.52 (q,  $J = 7.1$  Hz, 1H), 4.12 (dt,  $J = 14.8, 3.2$  Hz, 1H), 3.63 – 3.50 (m, 1H), 3.27 (dt,  $J = 14.1, 2.2$  Hz, 1H), 2.32 (s, 3H), 1.21 (d,  $J = 7.2$  Hz, 3H), 0.79 (td,  $J = 13.6, 4.1$  Hz, 1H); <sup>13</sup>C NMR (151 MHz, cdcl<sub>3</sub>)  $\delta$  151.3, 145.4, 143.5, 137.2, 130.3, 130.0, 129.8, 129.5, 129.3, 129.1, 128.6, 126.6, 126.3, 98.6, 50.1, 38.1, 32.1, 21.6, 19.0; AMM  $m/z$  calcd for C<sub>26</sub>H<sub>25</sub>N<sub>3</sub>O<sub>2</sub>SN<sup>+</sup> (M + Na)<sup>+</sup> 466.1565, found 466.1570.

**26b**: <sup>1</sup>H NMR (599 MHz, Chloroform-*d*)  $\delta$  7.89 (d,  $J = 7.6$  Hz, 2H), 7.54 (t,  $J = 7.6$  Hz, 2H), 7.47 (t,  $J = 7.4$  Hz, 1H), 7.34 – 7.28 (m, 1H), 7.28 – 7.19 (m, 6H), 7.06 (d,  $J = 7.9$  Hz, 2H), 5.78 (q,  $J = 6.7$  Hz, 1H), 3.48 (ddt,  $J = 21.6, 18.0, 8.2$  Hz, 2H), 3.34 – 3.23 (m, 1H), 2.37 (s, 3H), 1.61 (dt,  $J = 12.6, 8.8$  Hz, 1H), 1.32 (d,  $J = 6.6$  Hz, 3H); <sup>13</sup>C NMR (151 MHz, cdcl<sub>3</sub>)  $\delta$  151.3, 150.8, 143.4, 135.9, 132.2, 131.1, 129.8, 129.7, 129.5, 129.5, 129.3, 129.2, 129.0, 129.0, 128.6, 128.5, 127.3, 126.6, 126.4, 126.3, 101.8, 51.8, 36.1, 27.4, 21.6, 18.5.

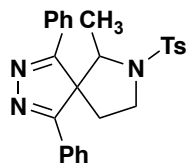

**6-methyl-1,4-diphenyl-7-tosyl-2,3,7-triazaspiro[4.4]nona-1,3-diene (27)**

A 62:38 mixture of diastereomers **26a:26b** (33.7 mg) was heated to 140 °C and monitored for 24 hours for full conversion of diastereomer **26b**, which after purification by flash column chromatography (80:20 Hexanes: EtOAc, then 90:10 toluene:EtOAc) provided **27** (4.3 mg, 13% from mixture of **26a:26b**, 34% from **26b**). <sup>1</sup>H NMR (599 MHz, Chloroform-*d*) δ 7.78 – 7.72 (m, 4H), 7.49 – 7.41 (m, 4H), 7.40 – 7.31 (m, 4H), 7.25 (d, *J* = 8.0 Hz, 2H), 5.66 (q, *J* = 6.6 Hz, 1H), 4.11 (dd, *J* = 14.4, 6.1 Hz, 1H), 3.38 – 3.20 (m, 1H), 2.70 (ddd, *J* = 17.4, 11.9, 6.4 Hz, 1H), 2.52 (dd, *J* = 15.9, 4.1 Hz, 1H), 2.39 (s, 3H), 1.33 (d, *J* = 6.6 Hz, 3H); <sup>13</sup>C NMR (201 MHz, CDCl<sub>3</sub>) δ 148.0, 143.6, 139.3, 138.4, 136.2, 133.3, 129.8, 129.3, 128.9, 128.2, 127.5, 127.2, 127.1, 123.4, 117.6, 48.8, 37.7, 29.9, 23.1, 21.6, 20.8; AMM *m/z* calcd for C<sub>26</sub>H<sub>25</sub>N<sub>3</sub>O<sub>2</sub>SNa<sup>+</sup> (M + Na)<sup>+</sup> 466.1565, found 466.1563.

### 3. Experimental Procedures for Synthesis of Ketones

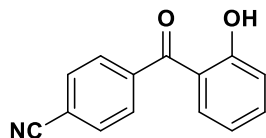

#### 4-(2-hydroxybenzoyl)benzonitrile (6)

Following a modified literature preparation, a solution of 4-bromobenzonitrile (1.21 g, 6.64 mmol) dissolved in anhydrous THF (28 mL) was cooled to  $-78\text{ }^{\circ}\text{C}$ . Butyllithium solution (2.9 mL, 2.5 M in hexanes) was added dropwise and the reaction was allowed to stir at  $-78\text{ }^{\circ}\text{C}$  for 20 minutes. The solution was observed to undergo a color change from red to brown. Salicylaldehyde (0.875 g, 6.42 mmol) dissolved in THF (19 mL) was then added to the solution. The reaction was stirred for 90 minutes before it was allowed to warm slowly to room temperature. The reaction was left stirring for 16 hours before it was quenched with saturated  $\text{NH}_4\text{Cl}$  (30 mL) and diluted with  $\text{H}_2\text{O}$  (10 mL). The aqueous layer was extracted with EtOAc (3 x 50 mL) and the combined organic extracts were washed with  $\text{H}_2\text{O}$  (3 x 50 mL). The organic layer was dried over  $\text{NaSO}_4$ , filtered and concentrated *in vacuo*. The residue was purified by column chromatography (96:4 to 95:5 Hexanes:EtOAc) to afford a yellow solid (1.306 g, 82%). A portion of this product (0.101 g, 0.427 mmol) was dissolved in  $\text{CH}_2\text{Cl}_2$  (3.2 mL) and solid  $\text{MnO}_2$  (0.733 g, 857 mmol) was added. The reaction mixture was allowed to stir for 24 hours and was then filtered on a pad of Celite. The filter cake was washed with  $\text{CH}_2\text{Cl}_2$  and the filtrate was concentrated to afford a yellow solid (0.093 mg, 97%). The methoxy ketone (0.105 g, 0.443 mmol) was dissolved in anhydrous  $\text{CH}_2\text{Cl}_2$  (4.5 mL). The solution was cooled to  $0\text{ }^{\circ}\text{C}$  for ten minutes before  $\text{BCl}_3$  (0.66 mL, 1.0 M  $\text{CH}_2\text{Cl}_2$ ) was added dropwise. The solution was left stirring for an hour and then quenched with saturated aqueous  $\text{NH}_4\text{Cl}$  (5 mL). The solution was extracted with  $\text{CH}_2\text{Cl}_2$  (3 x 5 mL), washed with  $\text{H}_2\text{O}$  (5 mL), saturated aqueous  $\text{NaCl}$  (10 mL), dried over  $\text{NaSO}_4$ , filtered, and concentrated *in vacuo*. The residue was immediately alkylated with the desired alkynyl bromide.  $^1\text{H}$  NMR (400 MHz, Chloroform-*d*)  $\delta$  11.80 (d,  $J = 1.4$  Hz, 1H), 7.90 – 7.82 (m, 2H), 7.82 – 7.75 (m, 2H), 7.58 (t,  $J = 7.9$  Hz, 1H), 7.47 (d,  $J = 8.0$  Hz, 1H), 7.13 (d,  $J = 8.5$  Hz, 1H), 6.92 (t,  $J = 7.6$  Hz, 1H).  $^1\text{H}$  NMR spectrum is consistent with literature data.<sup>2</sup>

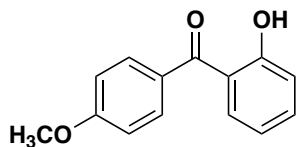

#### (2-hydroxyphenyl)(4-methoxyphenyl)methanone (7)

A solution of 4-bromoanisole (0.80 mL, 6.4 mmol) dissolved in anhydrous THF (26 mL) was cooled to  $-78\text{ }^{\circ}\text{C}$ . Butyllithium solution (2.7 mL, 2.5 M in hexanes) was added dropwise and the reaction was allowed to stir at  $-78\text{ }^{\circ}\text{C}$  for 30 minutes. Salicylaldehyde (0.81 mL, 6.7 mmol) dissolved in THF (18 mL) was then added to the solution. The reaction was stirred for 1 hour at  $-78\text{ }^{\circ}\text{C}$  before it was quenched with saturated  $\text{NH}_4\text{Cl}$  (30 mL) and diluted with  $\text{H}_2\text{O}$  (10 mL). The aqueous layer was extracted with EtOAc (3 x 50 mL) and the combined organic extracts were washed with  $\text{H}_2\text{O}$  (50 mL) followed by saturated aqueous  $\text{NaCl}$  (50 mL). The organic layer was dried over  $\text{NaSO}_4$ , filtered, and concentrated *in vacuo*. The residue was purified by column chromatography (90:10 to 80:20 Hexanes:EtOAc) to afford a clear oil (1.56 g, 6.39 mmol) which was immediately dissolved in anhydrous  $\text{CH}_2\text{Cl}_2$  (3.2 mL) and solid  $\text{MnO}_2$  (5.55 g, 63.9 mmol)

was added. The reaction mixture was allowed to stir for 24 hours and filtered on a pad of Celite. The filter cake was washed with  $\text{CH}_2\text{Cl}_2$  and the filtrate was concentrated to afford a white solid (1.28 g, 83%). The methoxy ketone was dissolved in anhydrous  $\text{CH}_2\text{Cl}_2$  and cooled to  $0\text{ }^\circ\text{C}$  for ten minutes before  $\text{BCl}_3$  was added dropwise. The solution was left stirring for an hour and then quenched with saturated aqueous  $\text{NH}_4\text{Cl}$ , extracted with  $\text{CH}_2\text{Cl}_2$  (3 x 5 mL), washed with  $\text{H}_2\text{O}$  (5 mL), saturated aqueous  $\text{NaCl}$  (10 mL), dried over  $\text{NaSO}_4$ , filtered, and concentrated *in vacuo*. The residue was immediately alkylated with the desired alkynyl bromide.  $^1\text{H}$  NMR (400 MHz, Chloroform-d)  $\delta$  11.96 (s, 1H), 7.77 – 7.68 (m, 2H), 7.63 (dd,  $J = 7.9, 1.7$  Hz, 1H), 7.49 (ddd,  $J = 8.7, 7.2, 1.7$  Hz, 1H), 7.07 (dd,  $J = 8.4, 1.1$  Hz, 1H), 7.04 – 6.97 (m, 2H), 6.88 (ddd,  $J = 8.2, 7.2, 1.2$  Hz, 1H), 3.90 (s, 3H).  $^1\text{H}$  NMR spectrum is consistent with literature data.<sup>2</sup>

### General Procedure E for Propargyl Bromines

Triphenylphosphine (1.1 equiv) was dissolved in  $\text{CH}_2\text{Cl}_2$  (0.5 M) and the solution was cooled to  $0\text{ }^\circ\text{C}$ . Molecular bromine (1.1 equiv) was added and the cloudy yellow-orange solution was left stirring for 30 minutes. Upon the dropwise addition of alcohol (1.0 equiv) at  $0\text{ }^\circ\text{C}$  the solution became clear. After an hour, a volume of hexanes equal to double the amount of  $\text{CH}_2\text{Cl}_2$  was added and a precipitate was formed. The solution was left stirring for an hour before it was filtered and the filtrate was concentrated *in vacuo*. The crude oil was purified by column chromatography (95:5 or 90:10 Hexanes:EtOAc) to afford a clear oil.

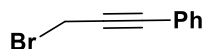

#### (3-bromoprop-1-yn-1-yl)benzene (8)

Following general procedure E, triphenylphosphine (0.852 g, 0.325 mmol) was dissolved in  $\text{CH}_2\text{Cl}_2$  (8 mL), and molecular bromine (0.16 mL, 3.25 mmol). After 30 min of stirring at  $0\text{ }^\circ\text{C}$ , 3-phenyl-2-propyn-1-ol (0.37 mL, 2.96 mmol) was added. The crude oil was purified by column chromatography (95:5 Hexanes:EtOAc) to afford a clear oil (0.57 g, 98%).  $^1\text{H}$  NMR (600 MHz, Chloroform-d)  $\delta$  7.66 – 7.42 (m, 1H), 7.41 – 7.28 (m, 3H), 4.17 (t,  $J = 6.2$  Hz, 1H).  $^1\text{H}$  NMR spectrum is consistent with literature data<sup>3</sup>

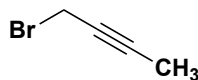

#### 1-bromobut-2-yne (9)

Following general procedure E, triphenylphosphine (1.35 g, 5.2 mmol) was dissolved in  $\text{CH}_2\text{Cl}_2$  (9.4 mL), and molecular bromine (0.26 mL, 5.2 mmol). After 30 min of stirring at  $0\text{ }^\circ\text{C}$ , 2-butyne-1-ol (0.35 mL, 5.0 mmol) was added. The crude oil was purified by column chromatography (90:10 Hexanes:EtOAc) to afford a clear oil in quantitative yield. Product is volatile under vacuum.  $^1\text{H}$  NMR (400 MHz, Chloroform-d)  $\delta$  4.55 (d,  $J = 7.0$  Hz, 2H), 2.49 (s, 3H).  $^1\text{H}$  NMR spectrum is consistent with literature data.<sup>4</sup>



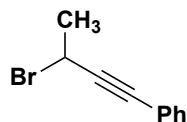

### (3-bromobut-1-yn-1-yl)benzene (10)

Following general procedure E, triphenylphosphine (2.16 g, 8.3 mmol) was dissolved in CH<sub>2</sub>Cl<sub>2</sub> (18.8 mL), and 4-phenyl-3-butyn-2-ol (1.10g, 7.5 mmol) was added dropwise. The crude oil was purified by column chromatography (90:10 Hexanes:EtOAc) to afford a clear oil as mixture of diastereomers (1.47 g, 93%). <sup>1</sup>H NMR (400 MHz, Chloroform-d) δ 7.48 – 7.33 (m, 10H), 5.72 (q, J = 6.6 Hz, 1H), 4.90 (q, J = 6.7 Hz, 1H), 2.04 (d, J = 6.8 Hz, 3H), 1.94 (d, J = 6.6 Hz, 3H). <sup>1</sup>H NMR spectrum is consistent with literature data.<sup>5</sup>

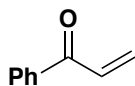

### 1-phenylprop-2-en-1-one (11)

Following the literature procedure, to a stirred solution of 3-chloropropiophenone (2.500 g, 14.83 mmol) in CHCl<sub>3</sub> was added Et<sub>3</sub>N (5.0 mL, 36 mmol) and stirred for 18 h. The mixture was washed with 1 M HCl (2 × 30 mL), H<sub>2</sub>O (2 × 30 mL), saturated aqueous NaHCO<sub>3</sub> (2 × 30 mL), dried over Na<sub>2</sub>SO<sub>4</sub>, filtered, and concentrated *in vacuo* to afford 1-phenylprop-2-en-1-one (1.940 g, 99%) as a colorless oil. <sup>1</sup>H NMR (400 MHz, Chloroform-d) δ 8.06 – 7.90 (m, 2H), 7.62 – 7.54 (m, 1H), 7.53 – 7.44 (m, 2H), 7.16 (ddd, J = 17.2, 10.6, 1.5 Hz, 1H), 6.44 (dt, J = 17.1, 1.6 Hz, 1H), 6.04 – 5.86 (m, 1H). <sup>1</sup>H NMR spectrum is consistent with literature data.<sup>6</sup>

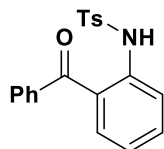

### N-(2-benzoylphenyl)-4-methylbenzenesulfonamide (12)

To 2-aminobenzophenone (3.00 g, 15.2 mmol) dissolved in CH<sub>2</sub>Cl<sub>2</sub> (30.0 mL) were added pyridine (3.8 mL, 45.6 mmol) and tosyl chloride (3.76 g, 19.7 mmol) at 0 °C. The solution was stirred for ten minutes before the ice/water bath was removed and the solution was allowed to stir at room temperature for 24 hours. The reaction was diluted with H<sub>2</sub>O (2 x 40 mL). The aqueous layers were extracted with CH<sub>2</sub>Cl<sub>2</sub> (2 x 10 mL) and the combined organic layers were washed with saturated NaCl (3 x 30 mL). The organic layers were dried over Na<sub>2</sub>SO<sub>4</sub> and concentrated *in vacuo*. The yellow solid was then triturated with cold CH<sub>2</sub>Cl<sub>2</sub> to afford **16** as an amorphous yellow solid. (4.85 g, 91%). <sup>1</sup>H NMR (400 MHz, Chloroform-d) δ 9.99 (s, 1H), 7.79 (dd, J = 8.3, 1.1 Hz, 1H), 7.56 (dd, J = 6.9, 4.7 Hz, 3H), 7.52 (td, J = 8.2, 1.8 Hz, 1H), 7.44 – 7.35 (m, 5H), 7.10 (td, J = 7.6, 1.2 Hz, 1H), 7.04 (d, J = 8.1 Hz, 2H), 2.23 (s, 3H). <sup>1</sup>H NMR spectrum is consistent with literature data.<sup>7</sup>

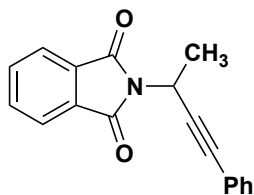

#### 2-(4-phenylbut-3-yn-2-yl)isoindoline-1,3-dione (**28**)

Phthalimide (272 mg, 1.9 mmol) was dissolved in  $\text{CH}_3\text{CN}$  (18.5 mL) and THF (4 mL).  $\text{Cs}_2\text{CO}_3$  (1.81 g, 5.6 mmol) was added, followed by bromine **9** (772 mg, 3.7 mmol), and the reaction was heated to 60 °C overnight. The  $\text{Cs}_2\text{CO}_3$  was filtered off, and the solvent was concentrated *in vacuo*. The crude mixture was purified by column chromatography (80:20 Hexanes:EtOAc) to afford a **28** (466 mg, 91%):  $^1\text{H}$  NMR (400 MHz, Chloroform-*d*)  $\delta$  7.96 – 7.67 (m, 5H), 7.43 (dd,  $J = 5.8, 2.6$  Hz, 2H), 7.33 – 7.26 (m, 3H), 5.43 (q,  $J = 7.1$  Hz, 1H), 1.79 (d,  $J = 7.1$  Hz, 3H);  $^{13}\text{C}$  NMR (101 MHz,  $\text{CDCl}_3$ )  $\delta$  167.0, 134.1, 134.1, 132.0, 131.9, 128.4, 128.2, 123.4, 86.6, 82.9, 77.3, 77.0, 76.7, 37.8, 20.3.  $^1\text{H}$  NMR spectrum is consistent with literature data.<sup>8</sup>

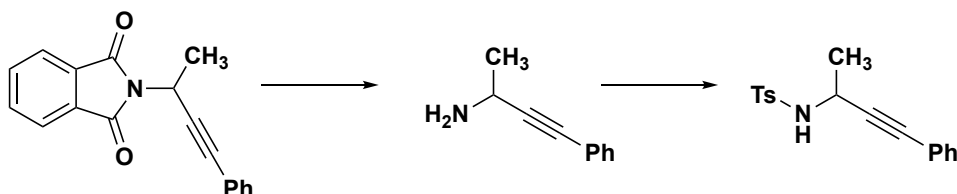

#### 4-methyl-*N*-(4-phenylbut-3-yn-2-yl)benzenesulfonamide (**30**)

Following a literature procedure<sup>#</sup>, **28** (361 mg, 1.3 mmol) was dissolved in EtOH (13.3 mL) and hydrazine monohydrate (0.62 mL, 13.0 mmol) was added and the reaction was heated to 80 °C for 30 minutes, at which point a precipitate was formed. The reaction was allowed to cool, diluted with water (20 mL), extracted with EtOAc (3 x 20 mL), and washed with NaCl (20 mL). The organic extract was dried over  $\text{Na}_2\text{SO}_4$  and concentrated *in vacuo*. The resulting amine **29** was taken into the next reaction without purification. To the primary amine **29** dissolved in  $\text{CH}_2\text{Cl}_2$  (3.1 mL) was added triethylamine (0.42 mL, 3.0 mmol), DMAP (32 mg, 0.3 mmol), and TsCl (248 mg, 1.3 mmol). After 18 hours, additional TsCl (124 mg) was added. The reaction was allowed to stir at room temperature for an additional 18 hours. The reaction was then diluted with EtOAc (25 mL), washed with 1M HCl (12 mL), extracted with EtOAc (25 mL), and washed with saturated  $\text{NH}_4\text{Cl}$  (25 mL) and dried over  $\text{Na}_2\text{SO}_4$ . The solution was concentrated *in vacuo*, and purified by column chromatography (80:20 Hexanes:EtOAc) to afford **30** (301 mg, 77%):  $^1\text{H}$  NMR (400 MHz, Chloroform-*d*)  $\delta$  7.81 (d,  $J = 8.2$  Hz, 2H), 7.28 (s, 2H), 7.24 (d,  $J = 5.8$  Hz, 3H), 7.06 (d,  $J = 7.3$  Hz, 2H), 4.43 (p,  $J = 7.2$  Hz, 1H), 1.51 (dd,  $J = 7.0, 1.4$  Hz, 3H).  $^1\text{H}$  NMR spectrum is consistent with literature data.<sup>8</sup>

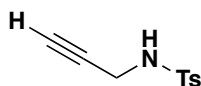

#### 4-methyl-*N*-(prop-2-yn-1-yl)benzenesulfonamide (**31**)

Following the reported procedure, prop-2-yn-1-amine (1.3 mL, 20 mmol) was dissolved in anhydrous  $\text{CH}_2\text{Cl}_2$  (50 mL) and cooled to 0 °C, followed by the addition of  $\text{Et}_3\text{N}$  (7.0 mL, 50 mmol) and TsCl (3.827 g, 20.07 mmol). The mixture was allowed to warm to room temperature and stirred overnight, before being diluted with  $\text{Et}_2\text{O}$  (200 mL). The mixture was washed with 1 M HCl (150 mL), saturated aqueous  $\text{NaHCO}_3$  (50 mL), dried over  $\text{MgSO}_4$ , filtered and concentrated *in vacuo*. The desired 4-methyl-*N*-(prop-2-yn-1-yl)benzenesulfonamide (3.803 g, 91

%) was obtained as a white solid.  $^1\text{H}$  NMR (400 MHz, Chloroform-*d*)  $\delta$  7.78 (d,  $J = 8.3$  Hz, 2H), 7.32 (d,  $J = 7.9$  Hz, 2H), 3.93 – 3.72 (m, 2H), 2.43 (s, 3H).  $^1\text{H}$  NMR spectrum is consistent with literature data.<sup>9</sup>

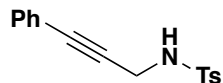

#### 4-methyl-*N*-(3-phenylprop-2-yn-1-yl)benzenesulfonamide (32)

4-Methyl-*N*-(prop-2-yn-1-yl)benzenesulfonamide (3.803 g, 18.17 mmol) was dissolved in anhydrous  $\text{CH}_3\text{CN}$  (25 mL), followed by the addition of  $\text{PdCl}_2(\text{PPh}_3)_3$  (0.189 g, 0.269 mmol),  $\text{CuI}$  (0.112 g, 0.588 mmol), and  $\text{PhI}$  (2.4 mL, 21 mmol). The solution was cooled to 0 °C and  $\text{Et}_3\text{N}$  (5.3 mL, 38 mmol) was added and the mixture was allowed to slowly warm to room temperature and stirred for 18 h.  $\text{CH}_2\text{Cl}_2$  (200 mL) and 1 M  $\text{HCl}$  (200 mL) was added and the phases separated, the aqueous phase was extracted with  $\text{CH}_2\text{Cl}_2$  (100 mL). The combined organic phases were dried over  $\text{Na}_2\text{SO}_4$ , filtered. The mixture was concentrated *in vacuo* and purified by flash column chromatography (80:20 to 60:40, Hexanes:EtOAc) afforded the desired alkyne (4.437 g, 86%) as an orange solid.  $^1\text{H}$  NMR (400 MHz, Chloroform-*d*)  $\delta$  7.81 (d,  $J = 8.1$  Hz, 2H), 7.36 – 7.24 (m, 6H), 7.13 (dd,  $J = 7.9, 1.7$  Hz, 2H), 4.08 (d,  $J = 6.1$  Hz, 2H), 2.36 (s, 3H).  $^1\text{H}$  NMR spectrum is consistent with literature data.<sup>10</sup>

#### References:

- (1) Yoshitomi, Y.; Makino, K.; Hamada, Y. *Org. Lett.* **2007**, *9* (13), 2457–2460.
- (2) Soldi, C.; Lamb, K. N.; Squitieri, R. A.; González-López, M.; Di Maso, M. J.; Shaw, J. T. *J. Am. Chem. Soc.* **2014**, *136* (43), 15142–15145.
- (3) Kleinbeck, F.; Toste, F. D. *J. Am. Chem. Soc.* **2009**, *131* (26), 9178–9179.
- (4) Ritter, C.; Nett, N.; Acevedo-Rocha, C. G.; Lonsdale, R.; Kraeling, K.; Dempwolff, F.; Hoebenreich, S.; Graumann, P. L.; Reetz, M. T.; Meggers, E. *Angew. Chemie Int. Ed.* **2015**, *54* (45), 13440–13443.
- (5) Okitsu, T.; Sato, K.; Potewar, T. M.; Wada, A. *J. Org. Chem.* **2011**, *76* (9), 3438–3449.
- (6) Chanthamath, S.; Takaki, S.; Shibatomi, K.; Iwasa, S. *Angew. Chemie Int. Ed.* **2013**, *52* (22), 5818–5821.
- (7) Yang, X.; Wang, H.; Zhou, X.; Li, X. *Org. Biomol. Chem.* **2016**, *14* (23), 5233–5237.
- (8) Kolleth, A.; Christoph, S.; Arseniyadis, S.; Cossy, J. *Chem. Commun.* **2012**, *48* (85), 10511–10513.
- (9) Campolo, D.; Arif, T.; Borie, C.; Mouysset, D.; Vanthuyne, N.; Naubron, J.-V.; Bertrand, M. P.; Nechab, M. *Angew. Chemie Int. Ed.* **2014**, *53* (12), 3227–3231.
- (10) Park, K. H.; Son, S. U.; Chung, Y. K. *Org. Lett.* **2002**, *4* (24), 4361–4363.

## 4. X-ray Crystallography Data

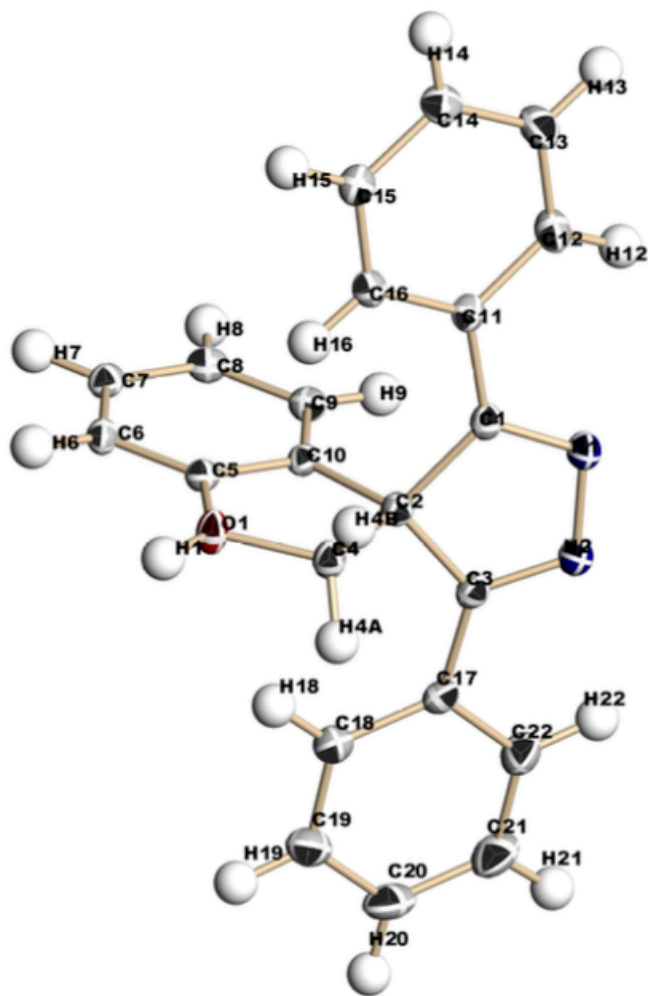

X-Ray Crystal Structure for Compound **4a**

Table 1. Crystal data and structure refinement for [C<sub>22</sub>H<sub>16</sub>N<sub>2</sub>O].

|                      |                                                  |                    |
|----------------------|--------------------------------------------------|--------------------|
| Identification code  | MJD17FMI                                         |                    |
| Empirical formula    | C <sub>22</sub> H <sub>16</sub> N <sub>2</sub> O |                    |
| Formula weight       | 324.37                                           |                    |
| Temperature          | 100(2) K                                         |                    |
| Wavelength           | 1.54178 Å                                        |                    |
| Crystal system       | Monoclinic                                       |                    |
| Space group          | P2 <sub>1</sub> /c                               |                    |
| Unit cell dimensions | a = 9.9756(7) Å                                  | ∠ = 90°.           |
|                      | b = 7.5962(5) Å                                  | ∠ = 100.3482(17)°. |
|                      | c = 21.4661(15) Å                                | ∠ = 90°.           |

|                                      |                                                                             |
|--------------------------------------|-----------------------------------------------------------------------------|
| Volume                               | 1600.17(19) Å <sup>3</sup>                                                  |
| Z                                    | 4                                                                           |
| Density (calculated)                 | 1.346 Mg/m <sup>3</sup>                                                     |
| Absorption coefficient               | 0.659 mm <sup>-1</sup>                                                      |
| F(000)                               | 680                                                                         |
| Crystal size                         | 0.358 x 0.241 x 0.180 mm <sup>3</sup>                                       |
| Crystal color and habit              | Colorless Block                                                             |
| Diffractometer                       | Bruker Photon100 CMOS                                                       |
| Theta range for data collection      | 4.187 to 72.333°.                                                           |
| Index ranges                         | -12<=h<=12, -8<=k<=9, -26<=l<=26                                            |
| Reflections collected                | 9860                                                                        |
| Independent reflections              | 3164 [R(int) = 0.0191]                                                      |
| Observed reflections (I > 2sigma(I)) | 3099                                                                        |
| Completeness to theta = 67.679°      | 99.6 %                                                                      |
| Absorption correction                | Semi-empirical from equivalents                                             |
| Max. and min. transmission           | 0.8818 and 0.8108                                                           |
| Solution method                      | SHELXT (Sheldrick, 2014)                                                    |
| Refinement method                    | SHELXL-2018/3 (Sheldrick, 2018) Full-matrix least-squares on F <sup>2</sup> |
| Data / restraints / parameters       | 3164 / 0 / 291                                                              |
| Goodness-of-fit on F <sup>2</sup>    | 1.083                                                                       |
| Final R indices [I>2sigma(I)]        | R1 = 0.0462, wR2 = 0.1196                                                   |
| R indices (all data)                 | R1 = 0.0468, wR2 = 0.1202                                                   |
| Extinction coefficient               | 0.0016(3)                                                                   |
| Largest diff. peak and hole          | 0.438 and -0.230 e.Å <sup>-3</sup>                                          |

Table 2. Atomic coordinates ( $\times 10^4$ ) and equivalent isotropic displacement parameters ( $\text{\AA}^2 \times 10^3$ ) for MJD17FMI.  $U(\text{eq})$  is defined as one third of the trace of the orthogonalized  $U^{ij}$  tensor.

|       | x        | y       | z       | $U(\text{eq})$ |
|-------|----------|---------|---------|----------------|
| C(1)  | 4095(1)  | 2194(2) | 6746(1) | 18(1)          |
| N(1)  | 4028(1)  | 2603(2) | 7322(1) | 22(1)          |
| O(1)  | 6307(1)  | 252(1)  | 5798(1) | 22(1)          |
| C(2)  | 5552(1)  | 1826(2) | 6662(1) | 18(1)          |
| N(2)  | 5371(1)  | 2587(2) | 7694(1) | 23(1)          |
| C(3)  | 6241(2)  | 2175(2) | 7340(1) | 19(1)          |
| C(4)  | 5823(2)  | -29(2)  | 6389(1) | 20(1)          |
| C(5)  | 6400(1)  | 2032(2) | 5704(1) | 17(1)          |
| C(6)  | 6828(1)  | 2772(2) | 5185(1) | 19(1)          |
| C(7)  | 6870(1)  | 4608(2) | 5159(1) | 20(1)          |
| C(8)  | 6486(1)  | 5644(2) | 5634(1) | 20(1)          |
| C(9)  | 6043(1)  | 4861(2) | 6149(1) | 20(1)          |
| C(10) | 6012(1)  | 3042(2) | 6177(1) | 17(1)          |
| C(11) | 2871(1)  | 2197(2) | 6249(1) | 18(1)          |
| C(12) | 1681(2)  | 3005(2) | 6374(1) | 25(1)          |
| C(13) | 507(2)   | 3031(2) | 5919(1) | 28(1)          |
| C(14) | 494(2)   | 2249(2) | 5334(1) | 25(1)          |
| C(15) | 1667(2)  | 1448(2) | 5201(1) | 21(1)          |
| C(16) | 2854(1)  | 1432(2) | 5654(1) | 19(1)          |
| C(17) | 7708(2)  | 2112(2) | 7602(1) | 21(1)          |
| C(18) | 8670(2)  | 1460(2) | 7257(1) | 25(1)          |
| C(19) | 10039(2) | 1358(2) | 7538(1) | 30(1)          |
| C(20) | 10463(2) | 1947(3) | 8153(1) | 33(1)          |
| C(21) | 9521(2)  | 2613(3) | 8492(1) | 36(1)          |
| C(22) | 8155(2)  | 2685(2) | 8222(1) | 29(1)          |

Table 3. Bond lengths [ $\text{\AA}$ ] and angles [ $^\circ$ ] for MJD17FMI.

---

|             |            |
|-------------|------------|
| C(1)-N(1)   | 1.2892(18) |
| C(1)-C(11)  | 1.4701(19) |
| C(1)-C(2)   | 1.5221(19) |
| N(1)-N(2)   | 1.4302(17) |
| O(1)-C(5)   | 1.3724(17) |
| O(1)-C(4)   | 1.4504(16) |
| C(2)-C(3)   | 1.5165(19) |
| C(2)-C(10)  | 1.5224(19) |
| C(2)-C(4)   | 1.5679(19) |
| N(2)-C(3)   | 1.2908(19) |
| C(3)-C(17)  | 1.471(2)   |
| C(4)-H(4A)  | 0.981(18)  |
| C(4)-H(4B)  | 0.989(19)  |
| C(5)-C(6)   | 1.3820(19) |
| C(5)-C(10)  | 1.3827(19) |
| C(6)-C(7)   | 1.397(2)   |
| C(6)-H(6)   | 0.971(19)  |
| C(7)-C(8)   | 1.395(2)   |
| C(7)-H(7)   | 1.003(19)  |
| C(8)-C(9)   | 1.395(2)   |
| C(8)-H(8)   | 0.93(2)    |
| C(9)-C(10)  | 1.384(2)   |
| C(9)-H(9)   | 0.98(2)    |
| C(11)-C(16) | 1.4003(19) |
| C(11)-C(12) | 1.405(2)   |
| C(12)-C(13) | 1.383(2)   |
| C(12)-H(12) | 0.997(19)  |
| C(13)-C(14) | 1.388(2)   |
| C(13)-H(13) | 1.01(2)    |
| C(14)-C(15) | 1.393(2)   |
| C(14)-H(14) | 0.94(2)    |
| C(15)-C(16) | 1.391(2)   |
| C(15)-H(15) | 0.987(19)  |
| C(16)-H(16) | 0.959(19)  |

|                  |            |
|------------------|------------|
| C(17)-C(22)      | 1.395(2)   |
| C(17)-C(18)      | 1.404(2)   |
| C(18)-C(19)      | 1.392(2)   |
| C(18)-H(18)      | 0.995(19)  |
| C(19)-C(20)      | 1.387(3)   |
| C(19)-H(19)      | 0.98(2)    |
| C(20)-C(21)      | 1.383(3)   |
| C(20)-H(20)      | 0.98(2)    |
| C(21)-C(22)      | 1.382(2)   |
| C(21)-H(21)      | 1.00(2)    |
| C(22)-H(22)      | 1.01(2)    |
|                  |            |
| N(1)-C(1)-C(11)  | 121.17(13) |
| N(1)-C(1)-C(2)   | 111.86(12) |
| C(11)-C(1)-C(2)  | 126.91(12) |
| C(1)-N(1)-N(2)   | 109.18(12) |
| C(5)-O(1)-C(4)   | 108.41(10) |
| C(3)-C(2)-C(1)   | 97.64(11)  |
| C(3)-C(2)-C(10)  | 114.11(12) |
| C(1)-C(2)-C(10)  | 112.38(11) |
| C(3)-C(2)-C(4)   | 115.89(11) |
| C(1)-C(2)-C(4)   | 116.26(12) |
| C(10)-C(2)-C(4)  | 101.30(11) |
| C(3)-N(2)-N(1)   | 109.61(12) |
| N(2)-C(3)-C(17)  | 120.65(13) |
| N(2)-C(3)-C(2)   | 111.70(13) |
| C(17)-C(3)-C(2)  | 127.64(12) |
| O(1)-C(4)-C(2)   | 107.55(11) |
| O(1)-C(4)-H(4A)  | 108.4(10)  |
| C(2)-C(4)-H(4A)  | 110.2(11)  |
| O(1)-C(4)-H(4B)  | 109.1(10)  |
| C(2)-C(4)-H(4B)  | 111.7(11)  |
| H(4A)-C(4)-H(4B) | 109.7(15)  |
| O(1)-C(5)-C(6)   | 123.94(13) |
| O(1)-C(5)-C(10)  | 113.75(12) |
| C(6)-C(5)-C(10)  | 122.30(14) |



|                   |            |
|-------------------|------------|
| C(5)-C(6)-C(7)    | 117.01(13) |
| C(5)-C(6)-H(6)    | 121.2(11)  |
| C(7)-C(6)-H(6)    | 121.8(11)  |
| C(8)-C(7)-C(6)    | 121.33(13) |
| C(8)-C(7)-H(7)    | 122.0(11)  |
| C(6)-C(7)-H(7)    | 116.6(11)  |
| C(9)-C(8)-C(7)    | 120.41(14) |
| C(9)-C(8)-H(8)    | 121.1(12)  |
| C(7)-C(8)-H(8)    | 118.5(12)  |
| C(10)-C(9)-C(8)   | 118.26(13) |
| C(10)-C(9)-H(9)   | 118.5(12)  |
| C(8)-C(9)-H(9)    | 123.3(12)  |
| C(5)-C(10)-C(9)   | 120.68(13) |
| C(5)-C(10)-C(2)   | 108.90(12) |
| C(9)-C(10)-C(2)   | 130.39(13) |
| C(16)-C(11)-C(12) | 118.97(13) |
| C(16)-C(11)-C(1)  | 122.24(13) |
| C(12)-C(11)-C(1)  | 118.78(13) |
| C(13)-C(12)-C(11) | 120.55(14) |
| C(13)-C(12)-H(12) | 120.7(10)  |
| C(11)-C(12)-H(12) | 118.6(10)  |
| C(12)-C(13)-C(14) | 120.13(14) |
| C(12)-C(13)-H(13) | 119.8(11)  |
| C(14)-C(13)-H(13) | 120.1(11)  |
| C(13)-C(14)-C(15) | 120.04(14) |
| C(13)-C(14)-H(14) | 120.7(12)  |
| C(15)-C(14)-H(14) | 119.2(12)  |
| C(16)-C(15)-C(14) | 120.13(14) |
| C(16)-C(15)-H(15) | 120.1(10)  |
| C(14)-C(15)-H(15) | 119.7(10)  |
| C(15)-C(16)-C(11) | 120.17(13) |
| C(15)-C(16)-H(16) | 119.1(11)  |
| C(11)-C(16)-H(16) | 120.7(11)  |
| C(22)-C(17)-C(18) | 118.77(14) |
| C(22)-C(17)-C(3)  | 118.78(14) |
| C(18)-C(17)-C(3)  | 122.44(13) |

|                   |            |
|-------------------|------------|
| C(19)-C(18)-C(17) | 120.16(15) |
| C(19)-C(18)-H(18) | 118.7(10)  |
| C(17)-C(18)-H(18) | 121.2(11)  |
| C(20)-C(19)-C(18) | 120.09(16) |
| C(20)-C(19)-H(19) | 119.1(12)  |
| C(18)-C(19)-H(19) | 120.8(12)  |
| C(21)-C(20)-C(19) | 119.89(15) |
| C(21)-C(20)-H(20) | 122.5(13)  |
| C(19)-C(20)-H(20) | 117.6(13)  |
| C(22)-C(21)-C(20) | 120.46(16) |
| C(22)-C(21)-H(21) | 117.7(12)  |
| C(20)-C(21)-H(21) | 121.7(12)  |
| C(21)-C(22)-C(17) | 120.61(16) |
| C(21)-C(22)-H(22) | 119.6(12)  |
| C(17)-C(22)-H(22) | 119.7(12)  |

---

Symmetry transformations used to generate equivalent atoms:

Table 4. Anisotropic displacement parameters ( $\text{\AA}^2 \times 10^3$ ) for MJD17FMI. The anisotropic displacement factor exponent takes the form:  $-2\sigma^2 [ h^2 a^{*2}U^{11} + \dots + 2 h k a^* b^* U^{12} ]$

|       | U <sup>11</sup> | U <sup>22</sup> | U <sup>33</sup> | U <sup>23</sup> | U <sup>13</sup> | U <sup>12</sup> |
|-------|-----------------|-----------------|-----------------|-----------------|-----------------|-----------------|
| C(1)  | 21(1)           | 17(1)           | 17(1)           | 0(1)            | 6(1)            | -1(1)           |
| N(1)  | 22(1)           | 27(1)           | 19(1)           | -3(1)           | 4(1)            | 2(1)            |
| O(1)  | 33(1)           | 16(1)           | 21(1)           | 1(1)            | 13(1)           | 0(1)            |
| C(2)  | 19(1)           | 18(1)           | 17(1)           | 1(1)            | 4(1)            | 1(1)            |
| N(2)  | 23(1)           | 27(1)           | 18(1)           | -2(1)           | 4(1)            | 3(1)            |
| C(3)  | 24(1)           | 18(1)           | 16(1)           | 2(1)            | 4(1)            | 1(1)            |
| C(4)  | 25(1)           | 17(1)           | 20(1)           | 2(1)            | 8(1)            | 1(1)            |
| C(5)  | 16(1)           | 17(1)           | 18(1)           | 1(1)            | 2(1)            | 0(1)            |
| C(6)  | 18(1)           | 22(1)           | 16(1)           | -1(1)           | 5(1)            | 0(1)            |
| C(7)  | 18(1)           | 21(1)           | 19(1)           | 3(1)            | 2(1)            | -2(1)           |
| C(8)  | 21(1)           | 15(1)           | 24(1)           | 1(1)            | 2(1)            | -2(1)           |
| C(9)  | 19(1)           | 18(1)           | 21(1)           | -2(1)           | 1(1)            | 0(1)            |
| C(10) | 16(1)           | 19(1)           | 15(1)           | 1(1)            | 2(1)            | 0(1)            |
| C(11) | 18(1)           | 18(1)           | 19(1)           | 1(1)            | 5(1)            | -3(1)           |
| C(12) | 23(1)           | 28(1)           | 25(1)           | -6(1)           | 7(1)            | -1(1)           |
| C(13) | 21(1)           | 34(1)           | 31(1)           | -6(1)           | 6(1)            | 1(1)            |
| C(14) | 19(1)           | 29(1)           | 26(1)           | -2(1)           | 2(1)            | -4(1)           |
| C(15) | 24(1)           | 20(1)           | 20(1)           | -2(1)           | 4(1)            | -4(1)           |
| C(16) | 21(1)           | 16(1)           | 21(1)           | 1(1)            | 6(1)            | -1(1)           |
| C(17) | 23(1)           | 21(1)           | 17(1)           | 4(1)            | 2(1)            | 1(1)            |
| C(18) | 25(1)           | 26(1)           | 23(1)           | 2(1)            | 3(1)            | 2(1)            |
| C(19) | 25(1)           | 30(1)           | 33(1)           | 6(1)            | 4(1)            | 4(1)            |
| C(20) | 24(1)           | 40(1)           | 33(1)           | 11(1)           | -5(1)           | -1(1)           |
| C(21) | 34(1)           | 48(1)           | 22(1)           | 0(1)            | -4(1)           | -5(1)           |
| C(22) | 30(1)           | 37(1)           | 20(1)           | -2(1)           | 2(1)            | -1(1)           |

Table 5. Hydrogen coordinates ( $\times 10^4$ ) and isotropic displacement parameters ( $\text{\AA}^2 \times 10^{-3}$ ) for MJD17FMI.

|       | x         | y        | z        | U(eq) |
|-------|-----------|----------|----------|-------|
| H(4A) | 6535(17)  | -650(20) | 6682(8)  | 21(4) |
| H(4B) | 4986(18)  | -750(30) | 6306(8)  | 25(4) |
| H(6)  | 7079(19)  | 2040(30) | 4853(9)  | 28(5) |
| H(7)  | 7159(18)  | 5140(20) | 4776(9)  | 26(4) |
| H(8)  | 6515(19)  | 6870(30) | 5594(9)  | 30(5) |
| H(9)  | 5758(19)  | 5530(30) | 6490(9)  | 28(5) |
| H(12) | 1717(18)  | 3620(30) | 6786(9)  | 27(5) |
| H(13) | -350(20)  | 3610(30) | 6016(9)  | 33(5) |
| H(14) | -290(20)  | 2300(20) | 5018(9)  | 28(5) |
| H(15) | 1656(18)  | 910(30)  | 4781(9)  | 26(4) |
| H(16) | 3659(18)  | 900(20)  | 5551(8)  | 25(4) |
| H(18) | 8394(18)  | 1060(30) | 6812(9)  | 27(5) |
| H(19) | 10710(20) | 850(30)  | 7309(10) | 40(5) |
| H(20) | 11430(20) | 1850(30) | 8333(10) | 41(6) |
| H(21) | 9810(20)  | 3150(30) | 8921(10) | 41(6) |
| H(22) | 7480(20)  | 3210(30) | 8470(10) | 43(6) |

Table 6. Torsion angles [°] for MJD17FMI.

---

|                       |             |
|-----------------------|-------------|
| C(11)-C(1)-N(1)-N(2)  | -176.77(12) |
| C(2)-C(1)-N(1)-N(2)   | 0.52(16)    |
| N(1)-C(1)-C(2)-C(3)   | -0.92(15)   |
| C(11)-C(1)-C(2)-C(3)  | 176.18(13)  |
| N(1)-C(1)-C(2)-C(10)  | -120.98(13) |
| C(11)-C(1)-C(2)-C(10) | 56.12(18)   |
| N(1)-C(1)-C(2)-C(4)   | 122.96(13)  |
| C(11)-C(1)-C(2)-C(4)  | -59.94(18)  |
| C(1)-N(1)-N(2)-C(3)   | 0.22(17)    |
| N(1)-N(2)-C(3)-C(17)  | 178.31(12)  |
| N(1)-N(2)-C(3)-C(2)   | -0.86(16)   |
| C(1)-C(2)-C(3)-N(2)   | 1.06(15)    |
| C(10)-C(2)-C(3)-N(2)  | 119.80(14)  |
| C(4)-C(2)-C(3)-N(2)   | -123.08(14) |
| C(1)-C(2)-C(3)-C(17)  | -178.05(14) |
| C(10)-C(2)-C(3)-C(17) | -59.31(19)  |
| C(4)-C(2)-C(3)-C(17)  | 57.81(19)   |
| C(5)-O(1)-C(4)-C(2)   | 2.20(15)    |
| C(3)-C(2)-C(4)-O(1)   | -126.96(12) |
| C(1)-C(2)-C(4)-O(1)   | 119.20(13)  |
| C(10)-C(2)-C(4)-O(1)  | -2.90(14)   |
| C(4)-O(1)-C(5)-C(6)   | -179.93(13) |
| C(4)-O(1)-C(5)-C(10)  | -0.46(16)   |
| O(1)-C(5)-C(6)-C(7)   | -179.84(12) |
| C(10)-C(5)-C(6)-C(7)  | 0.7(2)      |
| C(5)-C(6)-C(7)-C(8)   | -0.5(2)     |
| C(6)-C(7)-C(8)-C(9)   | -0.2(2)     |
| C(7)-C(8)-C(9)-C(10)  | 0.7(2)      |
| O(1)-C(5)-C(10)-C(9)  | -179.72(12) |
| C(6)-C(5)-C(10)-C(9)  | -0.2(2)     |
| O(1)-C(5)-C(10)-C(2)  | -1.55(16)   |
| C(6)-C(5)-C(10)-C(2)  | 177.93(12)  |
| C(8)-C(9)-C(10)-C(5)  | -0.5(2)     |
| C(8)-C(9)-C(10)-C(2)  | -178.24(13) |

|                         |             |
|-------------------------|-------------|
| C(3)-C(2)-C(10)-C(5)    | 127.92(13)  |
| C(1)-C(2)-C(10)-C(5)    | -122.10(13) |
| C(4)-C(2)-C(10)-C(5)    | 2.66(14)    |
| C(3)-C(2)-C(10)-C(9)    | -54.15(19)  |
| C(1)-C(2)-C(10)-C(9)    | 55.83(19)   |
| C(4)-C(2)-C(10)-C(9)    | -179.41(14) |
| N(1)-C(1)-C(11)-C(16)   | -166.96(14) |
| C(2)-C(1)-C(11)-C(16)   | 16.2(2)     |
| N(1)-C(1)-C(11)-C(12)   | 13.5(2)     |
| C(2)-C(1)-C(11)-C(12)   | -163.35(14) |
| C(16)-C(11)-C(12)-C(13) | 0.6(2)      |
| C(1)-C(11)-C(12)-C(13)  | -179.81(14) |
| C(11)-C(12)-C(13)-C(14) | 0.2(2)      |
| C(12)-C(13)-C(14)-C(15) | -0.5(3)     |
| C(13)-C(14)-C(15)-C(16) | -0.1(2)     |
| C(14)-C(15)-C(16)-C(11) | 0.9(2)      |
| C(12)-C(11)-C(16)-C(15) | -1.2(2)     |
| C(1)-C(11)-C(16)-C(15)  | 179.24(13)  |
| N(2)-C(3)-C(17)-C(22)   | -6.7(2)     |
| C(2)-C(3)-C(17)-C(22)   | 172.30(14)  |
| N(2)-C(3)-C(17)-C(18)   | 171.80(14)  |
| C(2)-C(3)-C(17)-C(18)   | -9.2(2)     |
| C(22)-C(17)-C(18)-C(19) | 1.3(2)      |
| C(3)-C(17)-C(18)-C(19)  | -177.23(14) |
| C(17)-C(18)-C(19)-C(20) | -1.8(2)     |
| C(18)-C(19)-C(20)-C(21) | 0.9(3)      |
| C(19)-C(20)-C(21)-C(22) | 0.5(3)      |
| C(20)-C(21)-C(22)-C(17) | -0.9(3)     |
| C(18)-C(17)-C(22)-C(21) | 0.1(2)      |
| C(3)-C(17)-C(22)-C(21)  | 178.64(15)  |

---

Symmetry transformations used to generate equivalent atoms:

Table 7. Hydrogen bonds for MJD17FMI [ $\text{\AA}$  and  $^\circ$ ].

| D-H...A             | d(D-H)    | d(H...A)  | d(D...A)   | $\angle(\text{DHA})$ |
|---------------------|-----------|-----------|------------|----------------------|
| C(4)-H(4B)...N(2)#1 | 0.989(19) | 2.570(18) | 3.0698(19) | 111.2(12)            |
| C(4)-H(4A)...N(1)#1 | 0.981(18) | 2.660(18) | 3.2812(19) | 121.5(12)            |
| C(4)-H(4B)...N(2)#1 | 0.989(19) | 2.570(18) | 3.0698(19) | 111.2(12)            |
| C(4)-H(4A)...N(1)#1 | 0.981(18) | 2.660(18) | 3.2812(19) | 121.5(12)            |

Symmetry transformations used to generate equivalent atoms:

#1  $-x+1, y-1/2, -z+3/2$

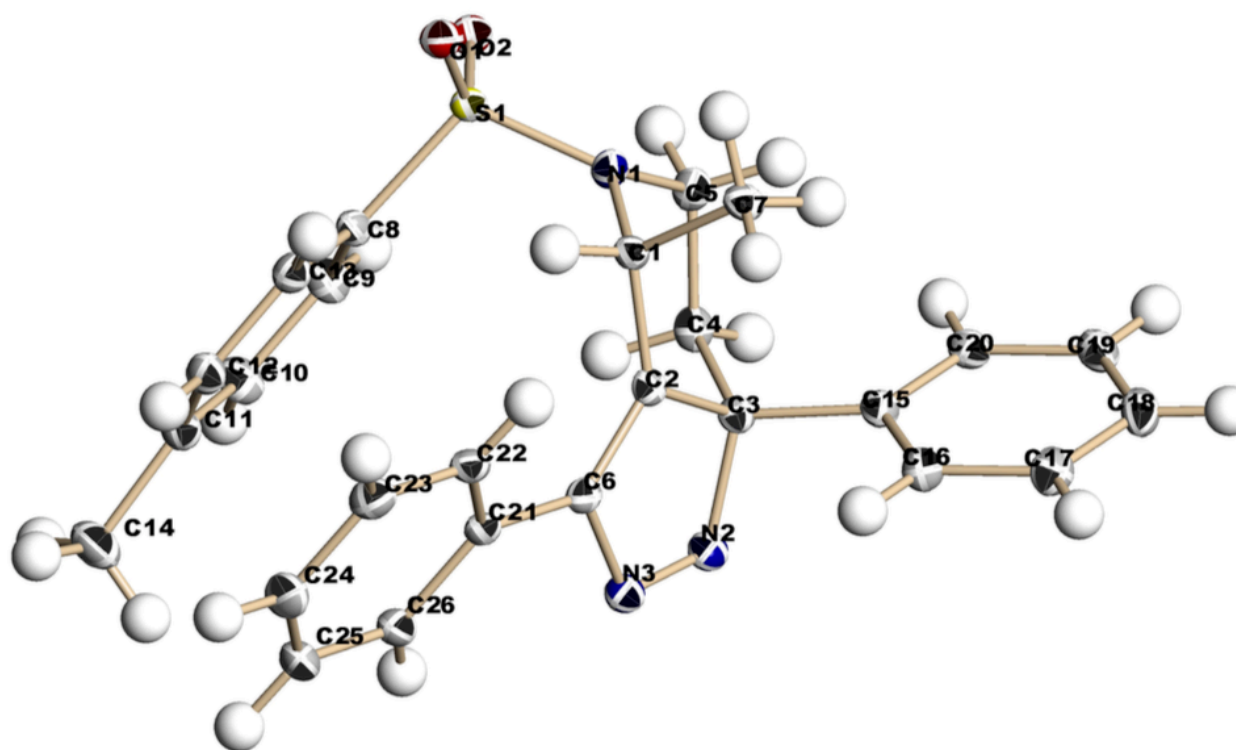

X-Ray Crystal Structure for Compound 26a

Table 1. Crystal data and structure refinement for [C<sub>26</sub>H<sub>25</sub>N<sub>3</sub>O<sub>2</sub>S].

|                        |                                                                 |          |
|------------------------|-----------------------------------------------------------------|----------|
| Identification code    | JF2817FMI                                                       |          |
| Empirical formula      | C <sub>26</sub> H <sub>25</sub> N <sub>3</sub> O <sub>2</sub> S |          |
| Formula weight         | 443.55                                                          |          |
| Temperature            | 100(2) K                                                        |          |
| Wavelength             | 0.71073 Å                                                       |          |
| Crystal system         | Orthorhombic                                                    |          |
| Space group            | Pbca                                                            |          |
| Unit cell dimensions   | a = 8.5579(6) Å                                                 | ∠ = 90°. |
|                        | b = 15.6314(11) Å                                               | ∠ = 90°. |
|                        | c = 32.583(2) Å                                                 | ∠ = 90°. |
| Volume                 | 4358.7(5) Å <sup>3</sup>                                        |          |
| Z                      | 8                                                               |          |
| Density (calculated)   | 1.352 Mg/m <sup>3</sup>                                         |          |
| Absorption coefficient | 0.178 mm <sup>-1</sup>                                          |          |
| F(000)                 | 1872                                                            |          |



|                                   |                                                                             |
|-----------------------------------|-----------------------------------------------------------------------------|
| Crystal size                      | 0.460 x 0.317 x 0.092 mm <sup>3</sup>                                       |
| Crystal color and habit           | Colorless Plate                                                             |
| Diffractometer                    | Bruker APEX-II CCD                                                          |
| Theta range for data collection   | 2.680 to 27.497°.                                                           |
| Index ranges                      | -11 ≤ h ≤ 11, -20 ≤ k ≤ 20, -42 ≤ l ≤ 42                                    |
| Reflections collected             | 37197                                                                       |
| Independent reflections           | 5000 [R(int) = 0.0235]                                                      |
| Observed reflections (I > 2σ(I))  | 4678                                                                        |
| Completeness to theta = 25.242°   | 99.9 %                                                                      |
| Absorption correction             | Semi-empirical from equivalents                                             |
| Max. and min. transmission        | 0.9615 and 0.8880                                                           |
| Solution method                   | SHELXT (Sheldrick, 2014)                                                    |
| Refinement method                 | SHELXL-2018/3 (Sheldrick, 2018) Full-matrix least-squares on F <sup>2</sup> |
| Data / restraints / parameters    | 5000 / 0 / 390                                                              |
| Goodness-of-fit on F <sup>2</sup> | 1.133                                                                       |
| Final R indices [I > 2σ(I)]       | R1 = 0.0402, wR2 = 0.0983                                                   |
| R indices (all data)              | R1 = 0.0429, wR2 = 0.0999                                                   |
| Extinction coefficient            | 0.0068(4)                                                                   |
| Largest diff. peak and hole       | 0.442 and -0.423 e.Å <sup>-3</sup>                                          |

Table 2. Atomic coordinates ( $\times 10^4$ ) and equivalent isotropic displacement parameters ( $\text{\AA}^2 \times 10^3$ ) for JF2817FMI.  $U(\text{eq})$  is defined as one third of the trace of the orthogonalized  $U^{ij}$  tensor.

|       | x        | y       | z       | $U(\text{eq})$ |
|-------|----------|---------|---------|----------------|
| S(1)  | 8587(1)  | 6065(1) | 5832(1) | 16(1)          |
| O(1)  | 9921(1)  | 5794(1) | 5598(1) | 20(1)          |
| O(2)  | 7991(1)  | 6917(1) | 5785(1) | 21(1)          |
| C(1)  | 7447(2)  | 4484(1) | 5756(1) | 15(1)          |
| N(1)  | 7157(2)  | 5421(1) | 5715(1) | 16(1)          |
| C(2)  | 6436(2)  | 4162(1) | 6101(1) | 15(1)          |
| N(2)  | 4268(2)  | 4103(1) | 6540(1) | 19(1)          |
| C(3)  | 4741(2)  | 4408(1) | 6124(1) | 16(1)          |
| N(3)  | 5408(2)  | 3750(1) | 6715(1) | 19(1)          |
| C(4)  | 4668(2)  | 5390(1) | 6114(1) | 19(1)          |
| C(5)  | 5528(2)  | 5714(1) | 5733(1) | 20(1)          |
| C(6)  | 6791(2)  | 3774(1) | 6457(1) | 16(1)          |
| C(7)  | 7169(2)  | 4031(1) | 5347(1) | 19(1)          |
| C(8)  | 9081(2)  | 5910(1) | 6354(1) | 17(1)          |
| C(9)  | 8273(2)  | 6361(1) | 6653(1) | 22(1)          |
| C(10) | 8630(2)  | 6217(1) | 7064(1) | 24(1)          |
| C(11) | 9762(2)  | 5623(1) | 7177(1) | 22(1)          |
| C(12) | 10581(2) | 5196(1) | 6871(1) | 21(1)          |
| C(13) | 10253(2) | 5336(1) | 6459(1) | 19(1)          |
| C(14) | 10030(3) | 5424(1) | 7623(1) | 32(1)          |
| C(15) | 3678(2)  | 3950(1) | 5816(1) | 17(1)          |
| C(16) | 3838(2)  | 3067(1) | 5769(1) | 20(1)          |
| C(17) | 2864(2)  | 2615(1) | 5505(1) | 24(1)          |
| C(18) | 1714(2)  | 3041(1) | 5285(1) | 24(1)          |
| C(19) | 1554(2)  | 3921(1) | 5330(1) | 22(1)          |
| C(20) | 2524(2)  | 4370(1) | 5593(1) | 19(1)          |
| C(21) | 8240(2)  | 3421(1) | 6625(1) | 16(1)          |
| C(22) | 9428(2)  | 3108(1) | 6372(1) | 18(1)          |
| C(23) | 10794(2) | 2788(1) | 6541(1) | 23(1)          |
| C(24) | 10990(2) | 2763(1) | 6964(1) | 26(1)          |
| C(25) | 9807(2)  | 3055(1) | 7219(1) | 24(1)          |
| C(26) | 8446(2)  | 3383(1) | 7052(1) | 20(1)          |

Table 3. Bond lengths [ $\text{\AA}$ ] and angles [ $^\circ$ ] for JF2817FMI.

---

|             |            |
|-------------|------------|
| S(1)-O(2)   | 1.4341(11) |
| S(1)-O(1)   | 1.4362(12) |
| S(1)-N(1)   | 1.6298(13) |
| S(1)-C(8)   | 1.7675(15) |
| C(1)-N(1)   | 1.4923(18) |
| C(1)-C(2)   | 1.503(2)   |
| C(1)-C(7)   | 1.5304(19) |
| C(1)-H(1)   | 0.967(19)  |
| N(1)-C(5)   | 1.4682(19) |
| C(2)-C(6)   | 1.345(2)   |
| C(2)-C(3)   | 1.503(2)   |
| N(2)-N(3)   | 1.2571(19) |
| N(2)-C(3)   | 1.4930(18) |
| C(3)-C(15)  | 1.532(2)   |
| C(3)-C(4)   | 1.537(2)   |
| N(3)-C(6)   | 1.4511(19) |
| C(4)-C(5)   | 1.528(2)   |
| C(4)-H(4A)  | 0.972(19)  |
| C(4)-H(4B)  | 1.00(2)    |
| C(5)-H(5A)  | 1.009(19)  |
| C(5)-H(5B)  | 1.010(19)  |
| C(6)-C(21)  | 1.464(2)   |
| C(7)-H(7A)  | 0.97(2)    |
| C(7)-H(7B)  | 0.963(19)  |
| C(7)-H(7C)  | 0.98(2)    |
| C(8)-C(9)   | 1.388(2)   |
| C(8)-C(13)  | 1.390(2)   |
| C(9)-C(10)  | 1.390(2)   |
| C(9)-H(9)   | 0.92(2)    |
| C(10)-C(11) | 1.391(2)   |
| C(10)-H(10) | 0.99(2)    |
| C(11)-C(12) | 1.389(2)   |
| C(11)-C(14) | 1.505(2)   |
| C(12)-C(13) | 1.388(2)   |

|                |            |
|----------------|------------|
| C(12)-H(12)    | 0.96(2)    |
| C(13)-H(13)    | 0.965(19)  |
| C(14)-H(14A)   | 1.00(3)    |
| C(14)-H(14B)   | 1.01(3)    |
| C(14)-H(14C)   | 0.93(3)    |
| C(15)-C(20)    | 1.390(2)   |
| C(15)-C(16)    | 1.396(2)   |
| C(16)-C(17)    | 1.390(2)   |
| C(16)-H(16)    | 0.96(2)    |
| C(17)-C(18)    | 1.388(2)   |
| C(17)-H(17)    | 0.900(19)  |
| C(18)-C(19)    | 1.389(2)   |
| C(18)-H(18)    | 0.95(2)    |
| C(19)-C(20)    | 1.385(2)   |
| C(19)-H(19)    | 0.94(2)    |
| C(20)-H(20)    | 0.972(19)  |
| C(21)-C(22)    | 1.399(2)   |
| C(21)-C(26)    | 1.405(2)   |
| C(22)-C(23)    | 1.386(2)   |
| C(22)-H(22)    | 0.94(2)    |
| C(23)-C(24)    | 1.391(2)   |
| C(23)-H(23)    | 0.93(2)    |
| C(24)-C(25)    | 1.386(2)   |
| C(24)-H(24)    | 0.99(2)    |
| C(25)-C(26)    | 1.384(2)   |
| C(25)-H(25)    | 0.97(2)    |
| C(26)-H(26)    | 0.94(2)    |
| O(2)-S(1)-O(1) | 120.04(7)  |
| O(2)-S(1)-N(1) | 106.38(7)  |
| O(1)-S(1)-N(1) | 106.90(7)  |
| O(2)-S(1)-C(8) | 108.32(7)  |
| O(1)-S(1)-C(8) | 106.19(7)  |
| N(1)-S(1)-C(8) | 108.64(7)  |
| N(1)-C(1)-C(2) | 107.51(12) |
| N(1)-C(1)-C(7) | 110.48(11) |

|                  |            |
|------------------|------------|
| C(2)-C(1)-C(7)   | 113.98(12) |
| N(1)-C(1)-H(1)   | 107.2(11)  |
| C(2)-C(1)-H(1)   | 108.6(11)  |
| C(7)-C(1)-H(1)   | 108.9(11)  |
| C(5)-N(1)-C(1)   | 117.42(12) |
| C(5)-N(1)-S(1)   | 120.72(10) |
| C(1)-N(1)-S(1)   | 117.42(10) |
| C(6)-C(2)-C(1)   | 131.75(14) |
| C(6)-C(2)-C(3)   | 106.76(13) |
| C(1)-C(2)-C(3)   | 120.52(12) |
| N(3)-N(2)-C(3)   | 109.91(12) |
| N(2)-C(3)-C(2)   | 103.09(12) |
| N(2)-C(3)-C(15)  | 106.52(12) |
| C(2)-C(3)-C(15)  | 114.81(12) |
| N(2)-C(3)-C(4)   | 109.21(12) |
| C(2)-C(3)-C(4)   | 107.11(12) |
| C(15)-C(3)-C(4)  | 115.32(12) |
| N(2)-N(3)-C(6)   | 111.09(12) |
| C(5)-C(4)-C(3)   | 109.26(12) |
| C(5)-C(4)-H(4A)  | 109.9(11)  |
| C(3)-C(4)-H(4A)  | 112.3(11)  |
| C(5)-C(4)-H(4B)  | 109.4(11)  |
| C(3)-C(4)-H(4B)  | 108.4(11)  |
| H(4A)-C(4)-H(4B) | 107.7(16)  |
| N(1)-C(5)-C(4)   | 112.73(12) |
| N(1)-C(5)-H(5A)  | 107.3(11)  |
| C(4)-C(5)-H(5A)  | 109.3(11)  |
| N(1)-C(5)-H(5B)  | 106.8(11)  |
| C(4)-C(5)-H(5B)  | 111.7(11)  |
| H(5A)-C(5)-H(5B) | 108.7(15)  |
| C(2)-C(6)-N(3)   | 109.13(13) |
| C(2)-C(6)-C(21)  | 133.12(14) |
| N(3)-C(6)-C(21)  | 117.72(12) |
| C(1)-C(7)-H(7A)  | 109.9(12)  |
| C(1)-C(7)-H(7B)  | 109.0(11)  |
| H(7A)-C(7)-H(7B) | 109.2(16)  |

|                     |            |
|---------------------|------------|
| C(1)-C(7)-H(7C)     | 109.2(12)  |
| H(7A)-C(7)-H(7C)    | 110.7(17)  |
| H(7B)-C(7)-H(7C)    | 108.8(16)  |
| C(9)-C(8)-C(13)     | 120.87(14) |
| C(9)-C(8)-S(1)      | 119.17(12) |
| C(13)-C(8)-S(1)     | 119.96(12) |
| C(8)-C(9)-C(10)     | 118.98(15) |
| C(8)-C(9)-H(9)      | 121.0(12)  |
| C(10)-C(9)-H(9)     | 120.0(12)  |
| C(9)-C(10)-C(11)    | 121.14(15) |
| C(9)-C(10)-H(10)    | 119.3(12)  |
| C(11)-C(10)-H(10)   | 119.5(12)  |
| C(12)-C(11)-C(10)   | 118.69(14) |
| C(12)-C(11)-C(14)   | 121.17(15) |
| C(10)-C(11)-C(14)   | 120.08(16) |
| C(13)-C(12)-C(11)   | 121.13(15) |
| C(13)-C(12)-H(12)   | 119.9(12)  |
| C(11)-C(12)-H(12)   | 119.0(12)  |
| C(12)-C(13)-C(8)    | 119.12(14) |
| C(12)-C(13)-H(13)   | 121.2(11)  |
| C(8)-C(13)-H(13)    | 119.6(11)  |
| C(11)-C(14)-H(14A)  | 112.1(14)  |
| C(11)-C(14)-H(14B)  | 113.3(14)  |
| H(14A)-C(14)-H(14B) | 107(2)     |
| C(11)-C(14)-H(14C)  | 108.9(18)  |
| H(14A)-C(14)-H(14C) | 110(2)     |
| H(14B)-C(14)-H(14C) | 105(2)     |
| C(20)-C(15)-C(16)   | 118.65(14) |
| C(20)-C(15)-C(3)    | 122.88(13) |
| C(16)-C(15)-C(3)    | 118.43(13) |
| C(17)-C(16)-C(15)   | 120.75(15) |
| C(17)-C(16)-H(16)   | 119.1(12)  |
| C(15)-C(16)-H(16)   | 120.2(12)  |
| C(18)-C(17)-C(16)   | 120.10(15) |
| C(18)-C(17)-H(17)   | 120.0(12)  |
| C(16)-C(17)-H(17)   | 119.8(12)  |

|                   |            |
|-------------------|------------|
| C(17)-C(18)-C(19) | 119.28(15) |
| C(17)-C(18)-H(18) | 121.7(12)  |
| C(19)-C(18)-H(18) | 119.0(12)  |
| C(20)-C(19)-C(18) | 120.61(15) |
| C(20)-C(19)-H(19) | 118.6(12)  |
| C(18)-C(19)-H(19) | 120.8(12)  |
| C(19)-C(20)-C(15) | 120.61(14) |
| C(19)-C(20)-H(20) | 118.1(11)  |
| C(15)-C(20)-H(20) | 121.3(11)  |
| C(22)-C(21)-C(26) | 118.69(14) |
| C(22)-C(21)-C(6)  | 121.83(13) |
| C(26)-C(21)-C(6)  | 119.48(14) |
| C(23)-C(22)-C(21) | 120.28(14) |
| C(23)-C(22)-H(22) | 118.8(13)  |
| C(21)-C(22)-H(22) | 120.9(13)  |
| C(22)-C(23)-C(24) | 120.46(15) |
| C(22)-C(23)-H(23) | 119.9(12)  |
| C(24)-C(23)-H(23) | 119.6(12)  |
| C(25)-C(24)-C(23) | 119.72(15) |
| C(25)-C(24)-H(24) | 121.8(12)  |
| C(23)-C(24)-H(24) | 118.5(12)  |
| C(26)-C(25)-C(24) | 120.22(15) |
| C(26)-C(25)-H(25) | 119.1(13)  |
| C(24)-C(25)-H(25) | 120.6(13)  |
| C(25)-C(26)-C(21) | 120.62(15) |
| C(25)-C(26)-H(26) | 118.3(12)  |
| C(21)-C(26)-H(26) | 121.1(12)  |

---

Symmetry transformations used to generate equivalent atoms:

Table 4. Anisotropic displacement parameters ( $\text{\AA}^2 \times 10^3$ ) for JF2817FMI. The anisotropic displacement factor exponent takes the form:  $-2\sigma^2 [ h^2 a^{*2} U^{11} + \dots + 2 h k a^* b^* U^{12} ]$

|       | $U^{11}$ | $U^{22}$ | $U^{33}$ | $U^{23}$ | $U^{13}$ | $U^{12}$ |
|-------|----------|----------|----------|----------|----------|----------|
| S(1)  | 19(1)    | 12(1)    | 16(1)    | 2(1)     | -2(1)    | -1(1)    |
| O(1)  | 21(1)    | 21(1)    | 19(1)    | 2(1)     | 2(1)     | -1(1)    |
| O(2)  | 25(1)    | 13(1)    | 23(1)    | 3(1)     | -3(1)    | -1(1)    |
| C(1)  | 18(1)    | 12(1)    | 14(1)    | 1(1)     | -1(1)    | 0(1)     |
| N(1)  | 17(1)    | 12(1)    | 20(1)    | 1(1)     | -3(1)    | 0(1)     |
| C(2)  | 18(1)    | 12(1)    | 15(1)    | -3(1)    | -1(1)    | 0(1)     |
| N(2)  | 21(1)    | 21(1)    | 16(1)    | -3(1)    | 2(1)     | -1(1)    |
| C(3)  | 18(1)    | 16(1)    | 15(1)    | -1(1)    | 1(1)     | 0(1)     |
| N(3)  | 20(1)    | 20(1)    | 16(1)    | -2(1)    | 2(1)     | -1(1)    |
| C(4)  | 19(1)    | 17(1)    | 22(1)    | -4(1)    | -2(1)    | 2(1)     |
| C(5)  | 19(1)    | 16(1)    | 25(1)    | 2(1)     | -4(1)    | 2(1)     |
| C(6)  | 19(1)    | 14(1)    | 14(1)    | -2(1)    | 1(1)     | -3(1)    |
| C(7)  | 26(1)    | 17(1)    | 14(1)    | -1(1)    | 0(1)     | -2(1)    |
| C(8)  | 22(1)    | 13(1)    | 16(1)    | 1(1)     | -4(1)    | -3(1)    |
| C(9)  | 28(1)    | 16(1)    | 22(1)    | -2(1)    | -3(1)    | 4(1)     |
| C(10) | 33(1)    | 21(1)    | 20(1)    | -4(1)    | -2(1)    | 2(1)     |
| C(11) | 27(1)    | 20(1)    | 20(1)    | 1(1)     | -4(1)    | -4(1)    |
| C(12) | 21(1)    | 19(1)    | 23(1)    | 3(1)     | -5(1)    | 0(1)     |
| C(13) | 19(1)    | 17(1)    | 21(1)    | -1(1)    | -1(1)    | -2(1)    |
| C(14) | 39(1)    | 35(1)    | 20(1)    | 3(1)     | -6(1)    | 1(1)     |
| C(15) | 17(1)    | 19(1)    | 15(1)    | -1(1)    | 2(1)     | 0(1)     |
| C(16) | 20(1)    | 20(1)    | 21(1)    | -1(1)    | 0(1)     | 2(1)     |
| C(17) | 25(1)    | 21(1)    | 24(1)    | -5(1)    | 0(1)     | 0(1)     |
| C(18) | 23(1)    | 28(1)    | 20(1)    | -6(1)    | -2(1)    | -2(1)    |
| C(19) | 20(1)    | 27(1)    | 19(1)    | 2(1)     | -2(1)    | 2(1)     |
| C(20) | 20(1)    | 20(1)    | 17(1)    | 0(1)     | 1(1)     | 2(1)     |
| C(21) | 20(1)    | 12(1)    | 16(1)    | 2(1)     | -1(1)    | -4(1)    |
| C(22) | 22(1)    | 14(1)    | 16(1)    | 2(1)     | 0(1)     | -2(1)    |
| C(23) | 20(1)    | 22(1)    | 26(1)    | 4(1)     | 2(1)     | 1(1)     |
| C(24) | 21(1)    | 29(1)    | 28(1)    | 8(1)     | -6(1)    | 1(1)     |
| C(25) | 26(1)    | 28(1)    | 19(1)    | 5(1)     | -5(1)    | -4(1)    |
| C(26) | 22(1)    | 20(1)    | 16(1)    | 1(1)     | -1(1)    | -3(1)    |



Table 5. Hydrogen coordinates ( $\times 10^4$ ) and isotropic displacement parameters ( $\text{\AA}^2 \times 10^{-3}$ ) for JF2817FMI.

|        | x         | y        | z       | U(eq) |
|--------|-----------|----------|---------|-------|
| H(1)   | 8530(20)  | 4413(12) | 5834(5) | 18(4) |
| H(4A)  | 3600(20)  | 5602(12) | 6113(6) | 19(4) |
| H(4B)  | 5190(20)  | 5616(13) | 6365(6) | 24(5) |
| H(5A)  | 4990(20)  | 5495(12) | 5479(6) | 22(5) |
| H(5B)  | 5550(20)  | 6360(12) | 5722(6) | 21(5) |
| H(7A)  | 6100(30)  | 4114(13) | 5260(6) | 25(5) |
| H(7B)  | 7360(20)  | 3428(12) | 5381(6) | 19(4) |
| H(7C)  | 7900(20)  | 4257(13) | 5142(6) | 27(5) |
| H(9)   | 7520(30)  | 6757(13) | 6583(6) | 28(5) |
| H(10)  | 8030(20)  | 6523(13) | 7280(6) | 27(5) |
| H(12)  | 11370(20) | 4792(13) | 6948(6) | 29(5) |
| H(13)  | 10780(20) | 5018(12) | 6247(6) | 22(5) |
| H(14A) | 9990(30)  | 5947(16) | 7798(8) | 47(7) |
| H(14B) | 11070(30) | 5138(16) | 7678(8) | 49(7) |
| H(14C) | 9290(40)  | 5033(18) | 7709(9) | 64(8) |
| H(16)  | 4630(20)  | 2762(12) | 5919(6) | 23(5) |
| H(17)  | 2950(20)  | 2043(13) | 5487(5) | 19(4) |
| H(18)  | 1040(20)  | 2747(13) | 5099(6) | 29(5) |
| H(19)  | 790(20)   | 4224(12) | 5183(6) | 24(5) |
| H(20)  | 2400(20)  | 4987(12) | 5610(5) | 21(5) |
| H(22)  | 9300(20)  | 3094(12) | 6086(6) | 25(5) |
| H(23)  | 11570(20) | 2565(12) | 6371(6) | 22(5) |
| H(24)  | 11970(30) | 2524(13) | 7076(6) | 33(5) |
| H(25)  | 9940(30)  | 3056(12) | 7516(7) | 30(5) |
| H(26)  | 7670(20)  | 3590(12) | 7233(6) | 23(5) |

Table 6. Torsion angles [ $^{\circ}$ ] for JF2817FMI.

---

|                      |             |
|----------------------|-------------|
| C(2)-C(1)-N(1)-C(5)  | -43.90(16)  |
| C(7)-C(1)-N(1)-C(5)  | 81.04(16)   |
| C(2)-C(1)-N(1)-S(1)  | 112.67(12)  |
| C(7)-C(1)-N(1)-S(1)  | -122.40(12) |
| O(2)-S(1)-N(1)-C(5)  | -21.61(13)  |
| O(1)-S(1)-N(1)-C(5)  | -151.00(11) |
| C(8)-S(1)-N(1)-C(5)  | 94.80(12)   |
| O(2)-S(1)-N(1)-C(1)  | -177.37(10) |
| O(1)-S(1)-N(1)-C(1)  | 53.25(12)   |
| C(8)-S(1)-N(1)-C(1)  | -60.95(12)  |
| N(1)-C(1)-C(2)-C(6)  | -120.11(16) |
| C(7)-C(1)-C(2)-C(6)  | 117.08(17)  |
| N(1)-C(1)-C(2)-C(3)  | 46.99(17)   |
| C(7)-C(1)-C(2)-C(3)  | -75.82(17)  |
| N(3)-N(2)-C(3)-C(2)  | -0.85(15)   |
| N(3)-N(2)-C(3)-C(15) | 120.37(13)  |
| N(3)-N(2)-C(3)-C(4)  | -114.48(14) |
| C(6)-C(2)-C(3)-N(2)  | 0.31(14)    |
| C(1)-C(2)-C(3)-N(2)  | -169.67(12) |
| C(6)-C(2)-C(3)-C(15) | -115.10(14) |
| C(1)-C(2)-C(3)-C(15) | 74.92(17)   |
| C(6)-C(2)-C(3)-C(4)  | 115.46(13)  |
| C(1)-C(2)-C(3)-C(4)  | -54.52(16)  |
| C(3)-N(2)-N(3)-C(6)  | 1.05(16)    |
| N(2)-C(3)-C(4)-C(5)  | 165.88(12)  |
| C(2)-C(3)-C(4)-C(5)  | 54.89(16)   |
| C(15)-C(3)-C(4)-C(5) | -74.25(16)  |
| C(1)-N(1)-C(5)-C(4)  | 52.67(17)   |
| S(1)-N(1)-C(5)-C(4)  | -103.08(13) |
| C(3)-C(4)-C(5)-N(1)  | -56.80(17)  |
| C(1)-C(2)-C(6)-N(3)  | 168.67(14)  |
| C(3)-C(2)-C(6)-N(3)  | 0.25(15)    |
| C(1)-C(2)-C(6)-C(21) | -9.2(3)     |
| C(3)-C(2)-C(6)-C(21) | -177.66(15) |

|                         |             |
|-------------------------|-------------|
| N(2)-N(3)-C(6)-C(2)     | -0.85(17)   |
| N(2)-N(3)-C(6)-C(21)    | 177.43(12)  |
| O(2)-S(1)-C(8)-C(9)     | 28.74(15)   |
| O(1)-S(1)-C(8)-C(9)     | 158.91(12)  |
| N(1)-S(1)-C(8)-C(9)     | -86.42(13)  |
| O(2)-S(1)-C(8)-C(13)    | -151.96(12) |
| O(1)-S(1)-C(8)-C(13)    | -21.79(14)  |
| N(1)-S(1)-C(8)-C(13)    | 92.87(13)   |
| C(13)-C(8)-C(9)-C(10)   | -1.4(2)     |
| S(1)-C(8)-C(9)-C(10)    | 177.91(13)  |
| C(8)-C(9)-C(10)-C(11)   | -0.9(3)     |
| C(9)-C(10)-C(11)-C(12)  | 2.5(3)      |
| C(9)-C(10)-C(11)-C(14)  | -174.80(17) |
| C(10)-C(11)-C(12)-C(13) | -2.0(2)     |
| C(14)-C(11)-C(12)-C(13) | 175.32(16)  |
| C(11)-C(12)-C(13)-C(8)  | -0.2(2)     |
| C(9)-C(8)-C(13)-C(12)   | 1.9(2)      |
| S(1)-C(8)-C(13)-C(12)   | -177.37(12) |
| N(2)-C(3)-C(15)-C(20)   | 110.24(15)  |
| C(2)-C(3)-C(15)-C(20)   | -136.35(15) |
| C(4)-C(3)-C(15)-C(20)   | -11.1(2)    |
| N(2)-C(3)-C(15)-C(16)   | -67.36(17)  |
| C(2)-C(3)-C(15)-C(16)   | 46.06(19)   |
| C(4)-C(3)-C(15)-C(16)   | 171.31(14)  |
| C(20)-C(15)-C(16)-C(17) | -0.1(2)     |
| C(3)-C(15)-C(16)-C(17)  | 177.57(14)  |
| C(15)-C(16)-C(17)-C(18) | 0.0(2)      |
| C(16)-C(17)-C(18)-C(19) | 0.2(2)      |
| C(17)-C(18)-C(19)-C(20) | -0.2(2)     |
| C(18)-C(19)-C(20)-C(15) | 0.0(2)      |
| C(16)-C(15)-C(20)-C(19) | 0.1(2)      |
| C(3)-C(15)-C(20)-C(19)  | -177.46(14) |
| C(2)-C(6)-C(21)-C(22)   | -27.5(2)    |
| N(3)-C(6)-C(21)-C(22)   | 154.74(13)  |
| C(2)-C(6)-C(21)-C(26)   | 153.20(16)  |
| N(3)-C(6)-C(21)-C(26)   | -24.57(19)  |

|                         |             |
|-------------------------|-------------|
| C(26)-C(21)-C(22)-C(23) | -1.5(2)     |
| C(6)-C(21)-C(22)-C(23)  | 179.18(14)  |
| C(21)-C(22)-C(23)-C(24) | 0.9(2)      |
| C(22)-C(23)-C(24)-C(25) | 0.4(3)      |
| C(23)-C(24)-C(25)-C(26) | -1.0(3)     |
| C(24)-C(25)-C(26)-C(21) | 0.4(2)      |
| C(22)-C(21)-C(26)-C(25) | 0.9(2)      |
| C(6)-C(21)-C(26)-C(25)  | -179.76(14) |

---

Symmetry transformations used to generate equivalent atoms:

Table 7. Hydrogen bonds for JF2817FMI [ $\text{\AA}$  and  $^\circ$ ].

| D-H...A           | d(D-H)    | d(H...A)  | d(D...A)   | $\angle(\text{DHA})$ |
|-------------------|-----------|-----------|------------|----------------------|
| C(5)-H(5B)...O(2) | 1.010(19) | 2.270(19) | 2.8301(19) | 113.6(14)            |

Symmetry transformations used to generate equivalent atoms:

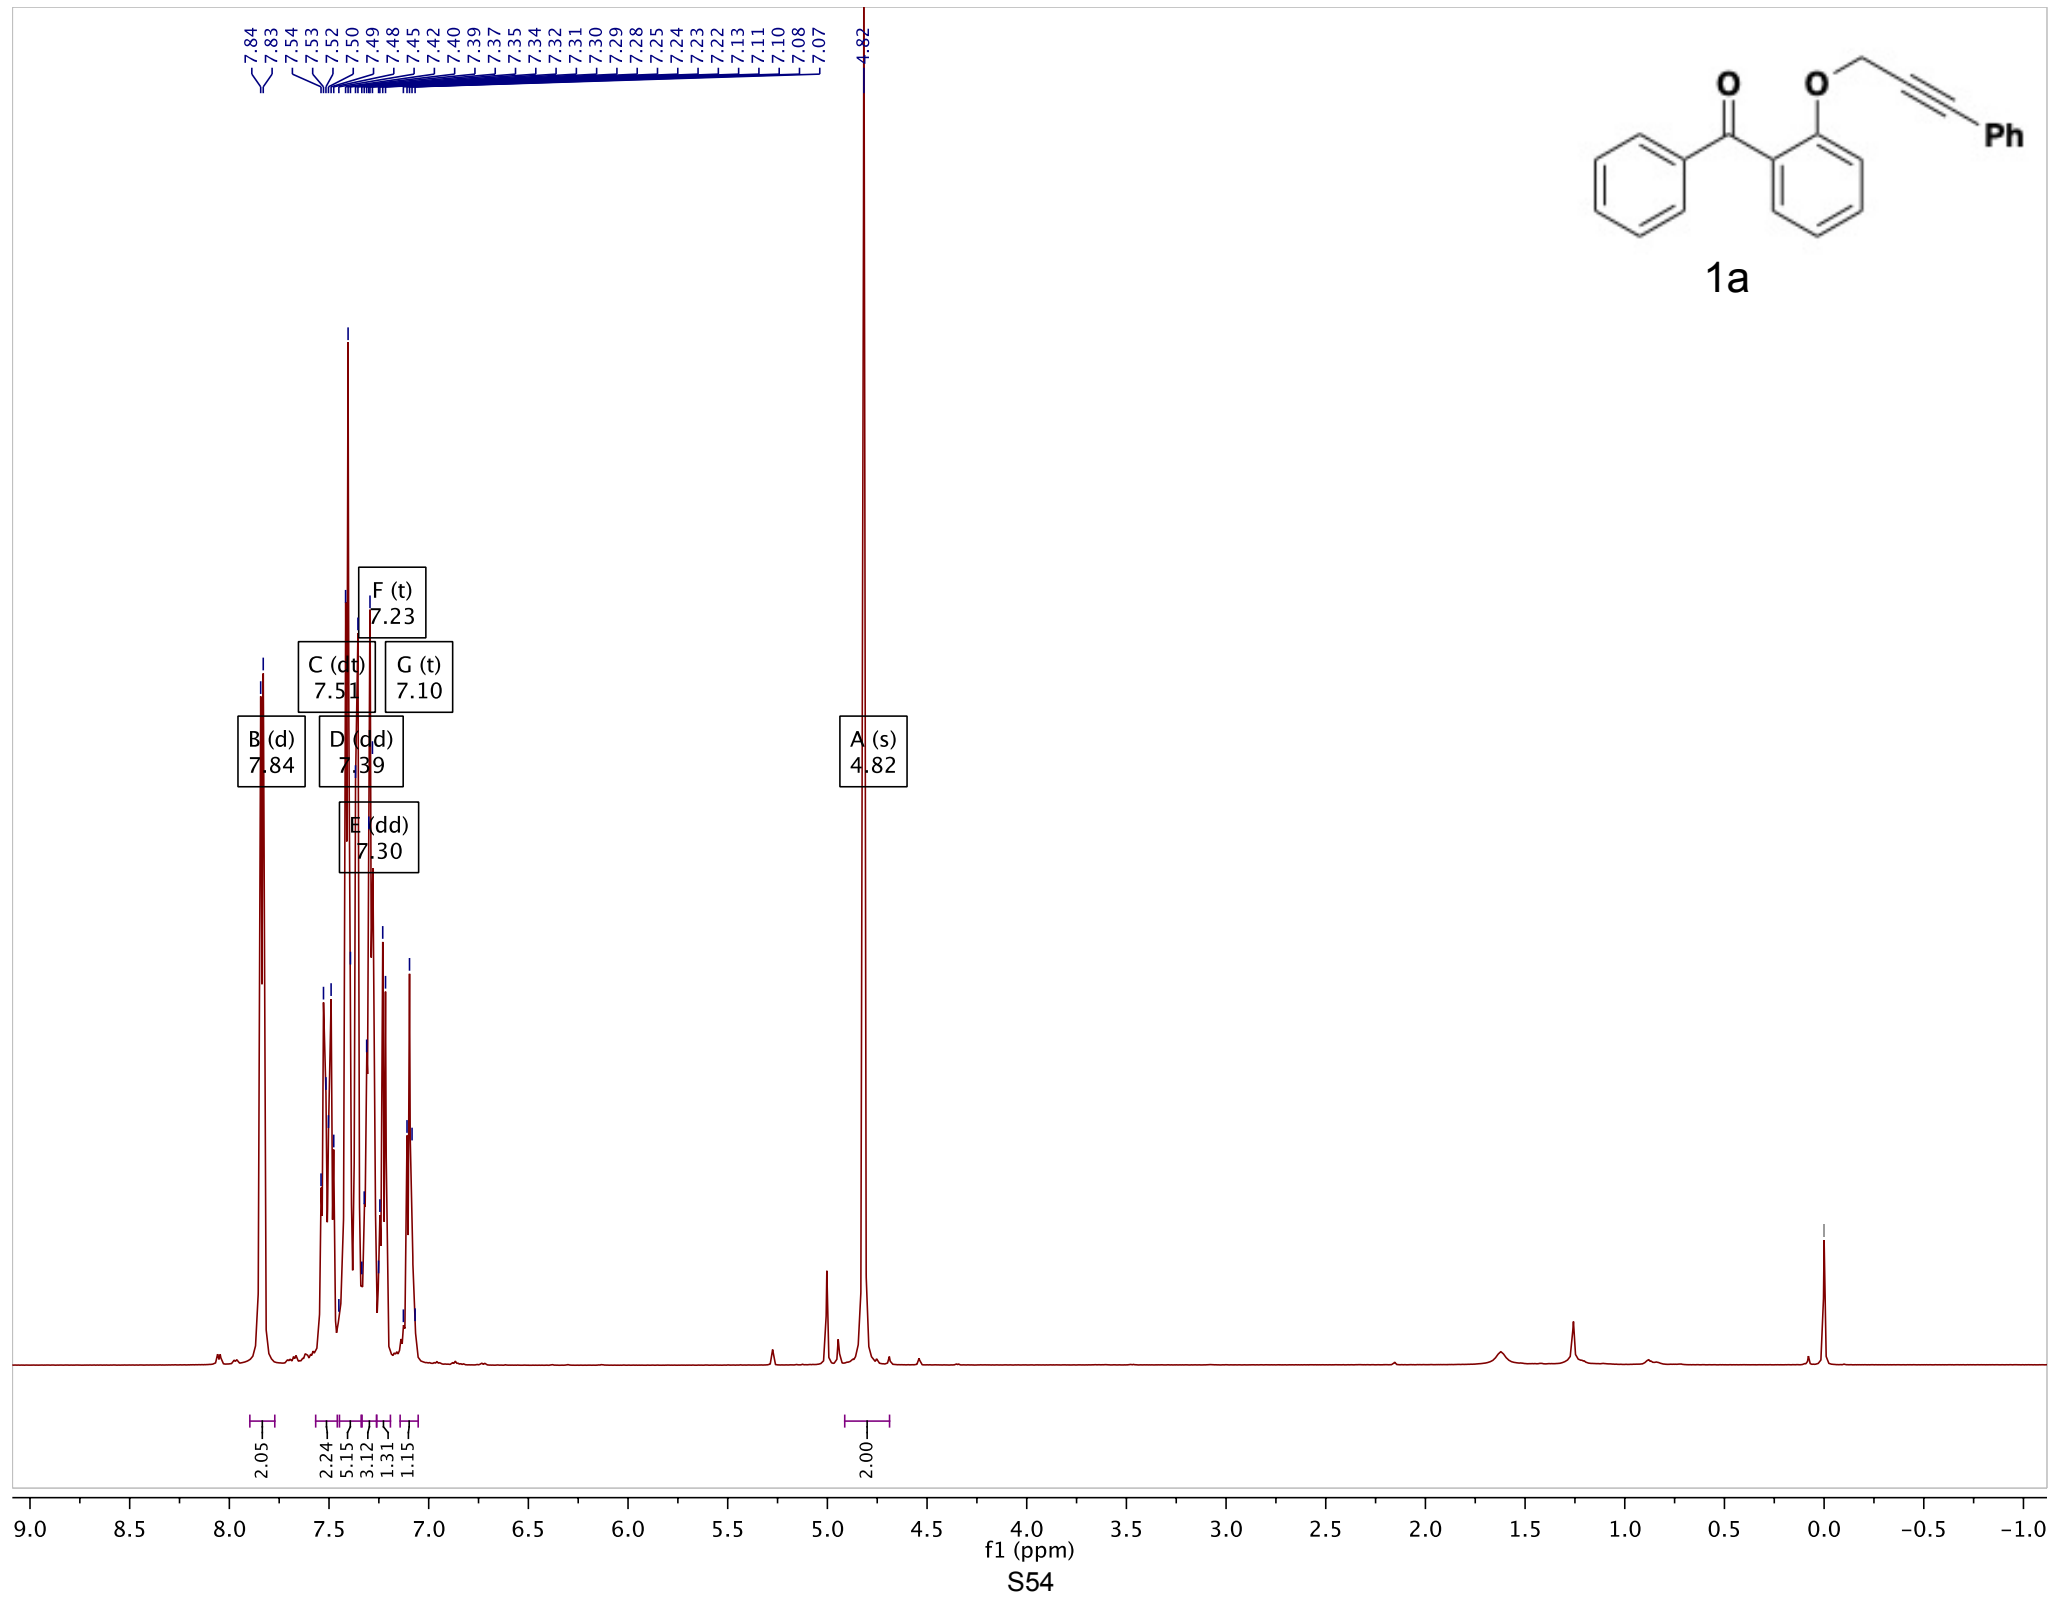

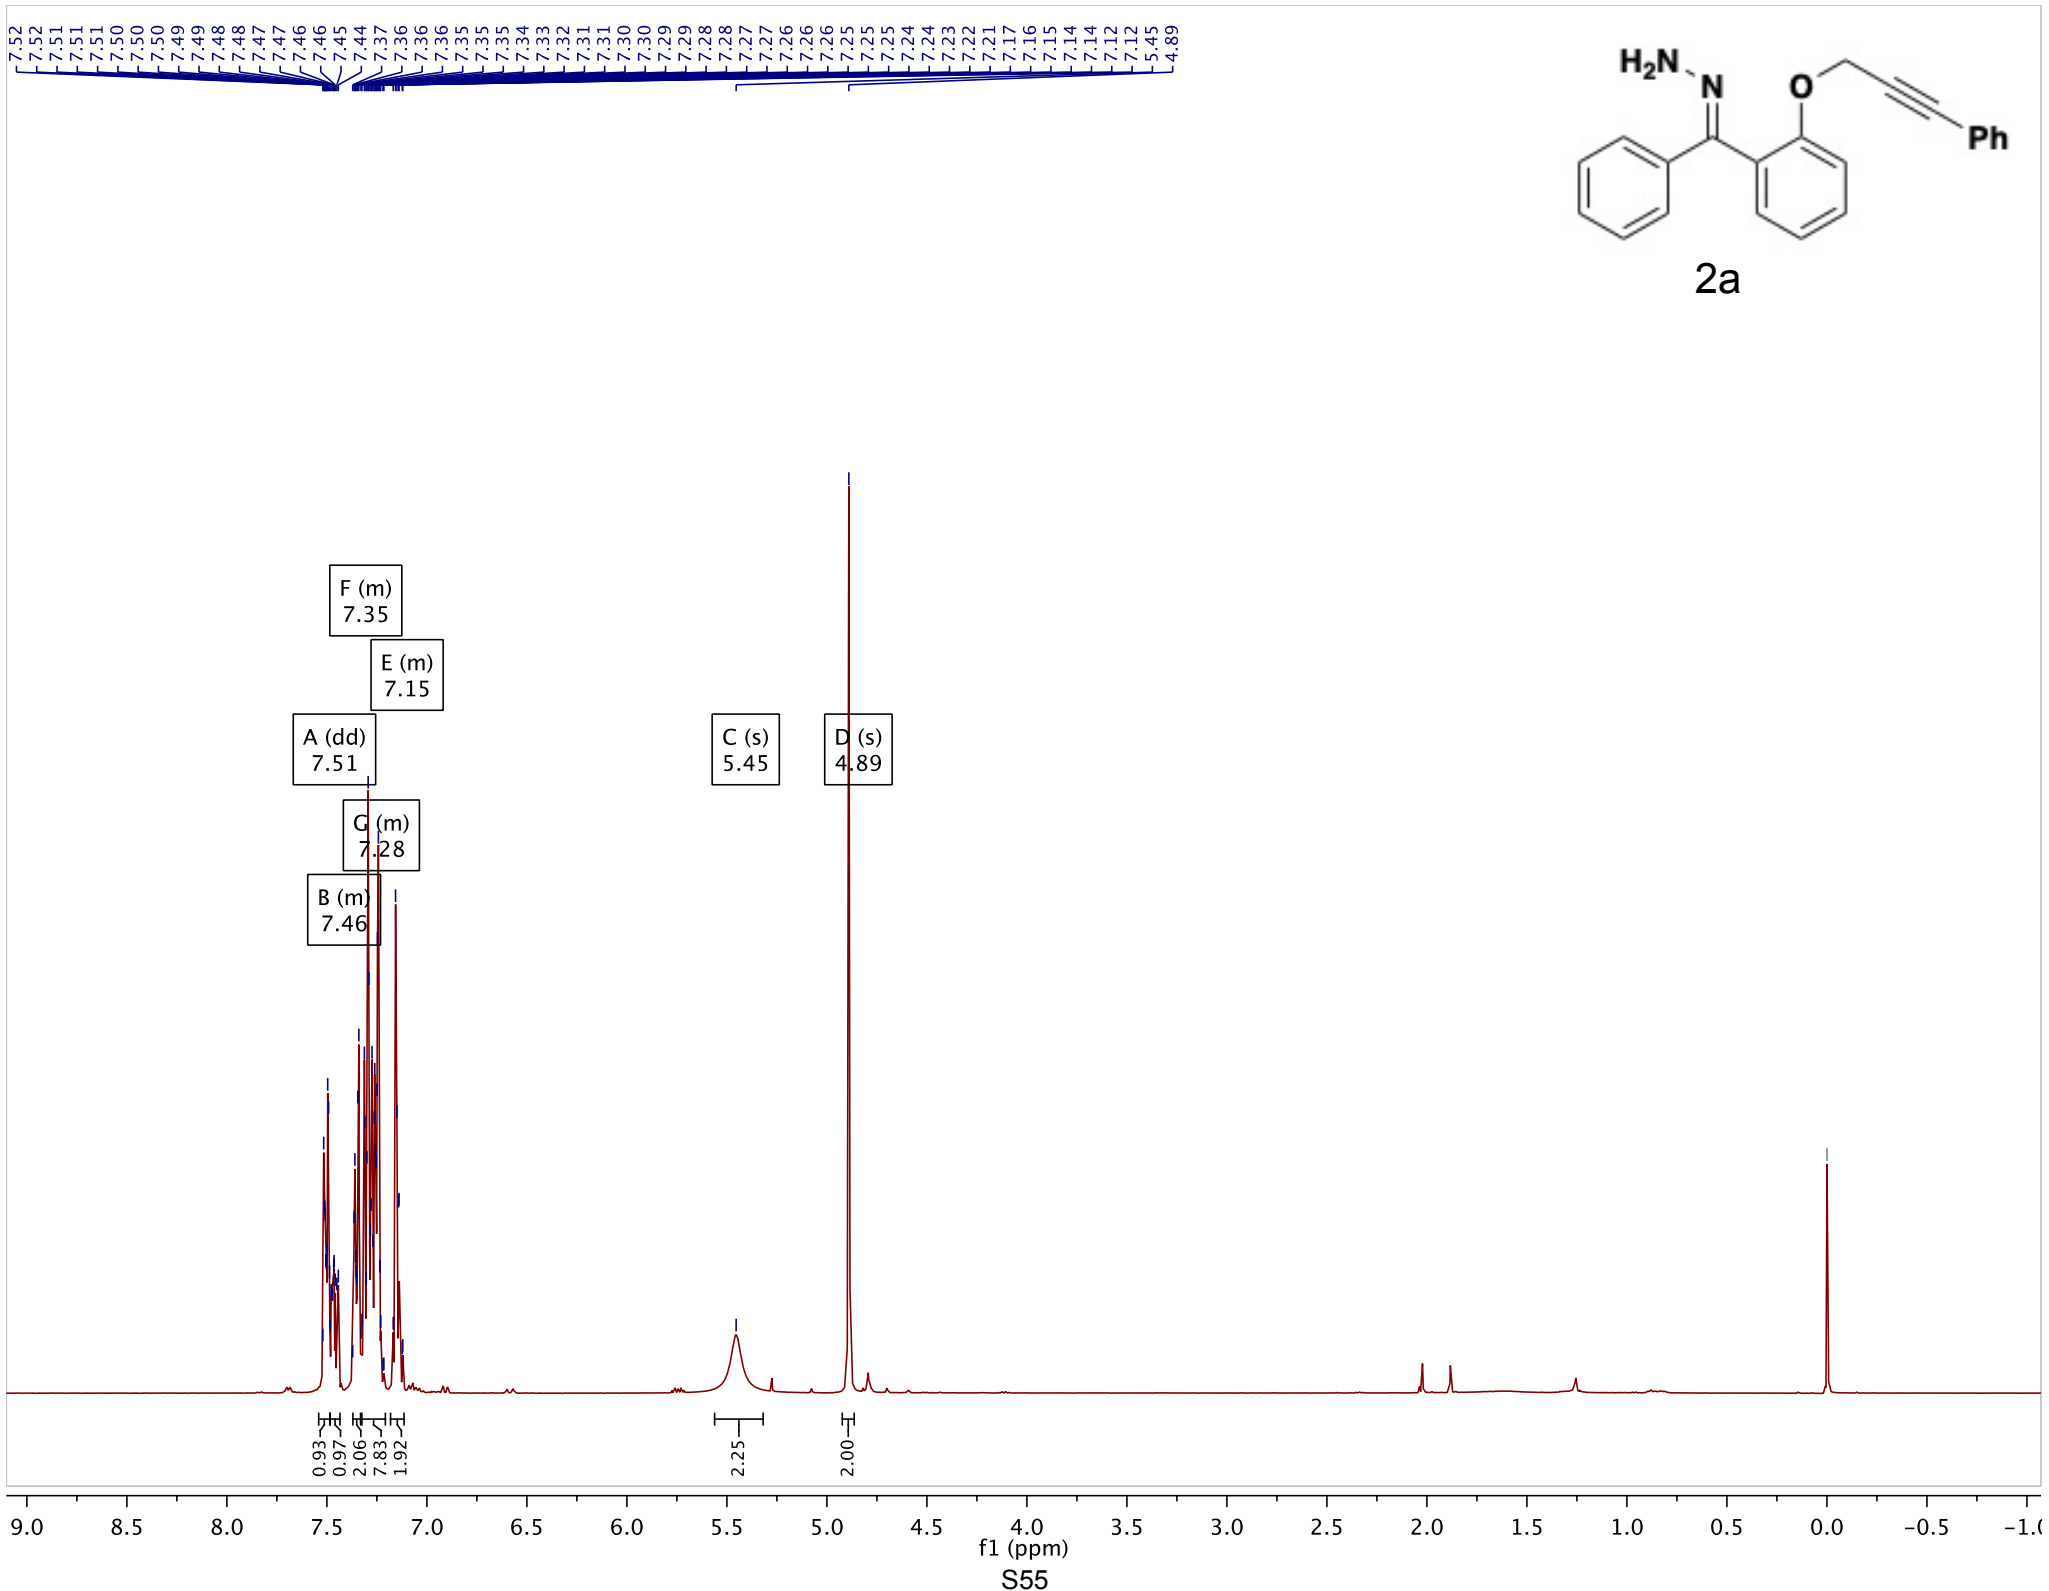

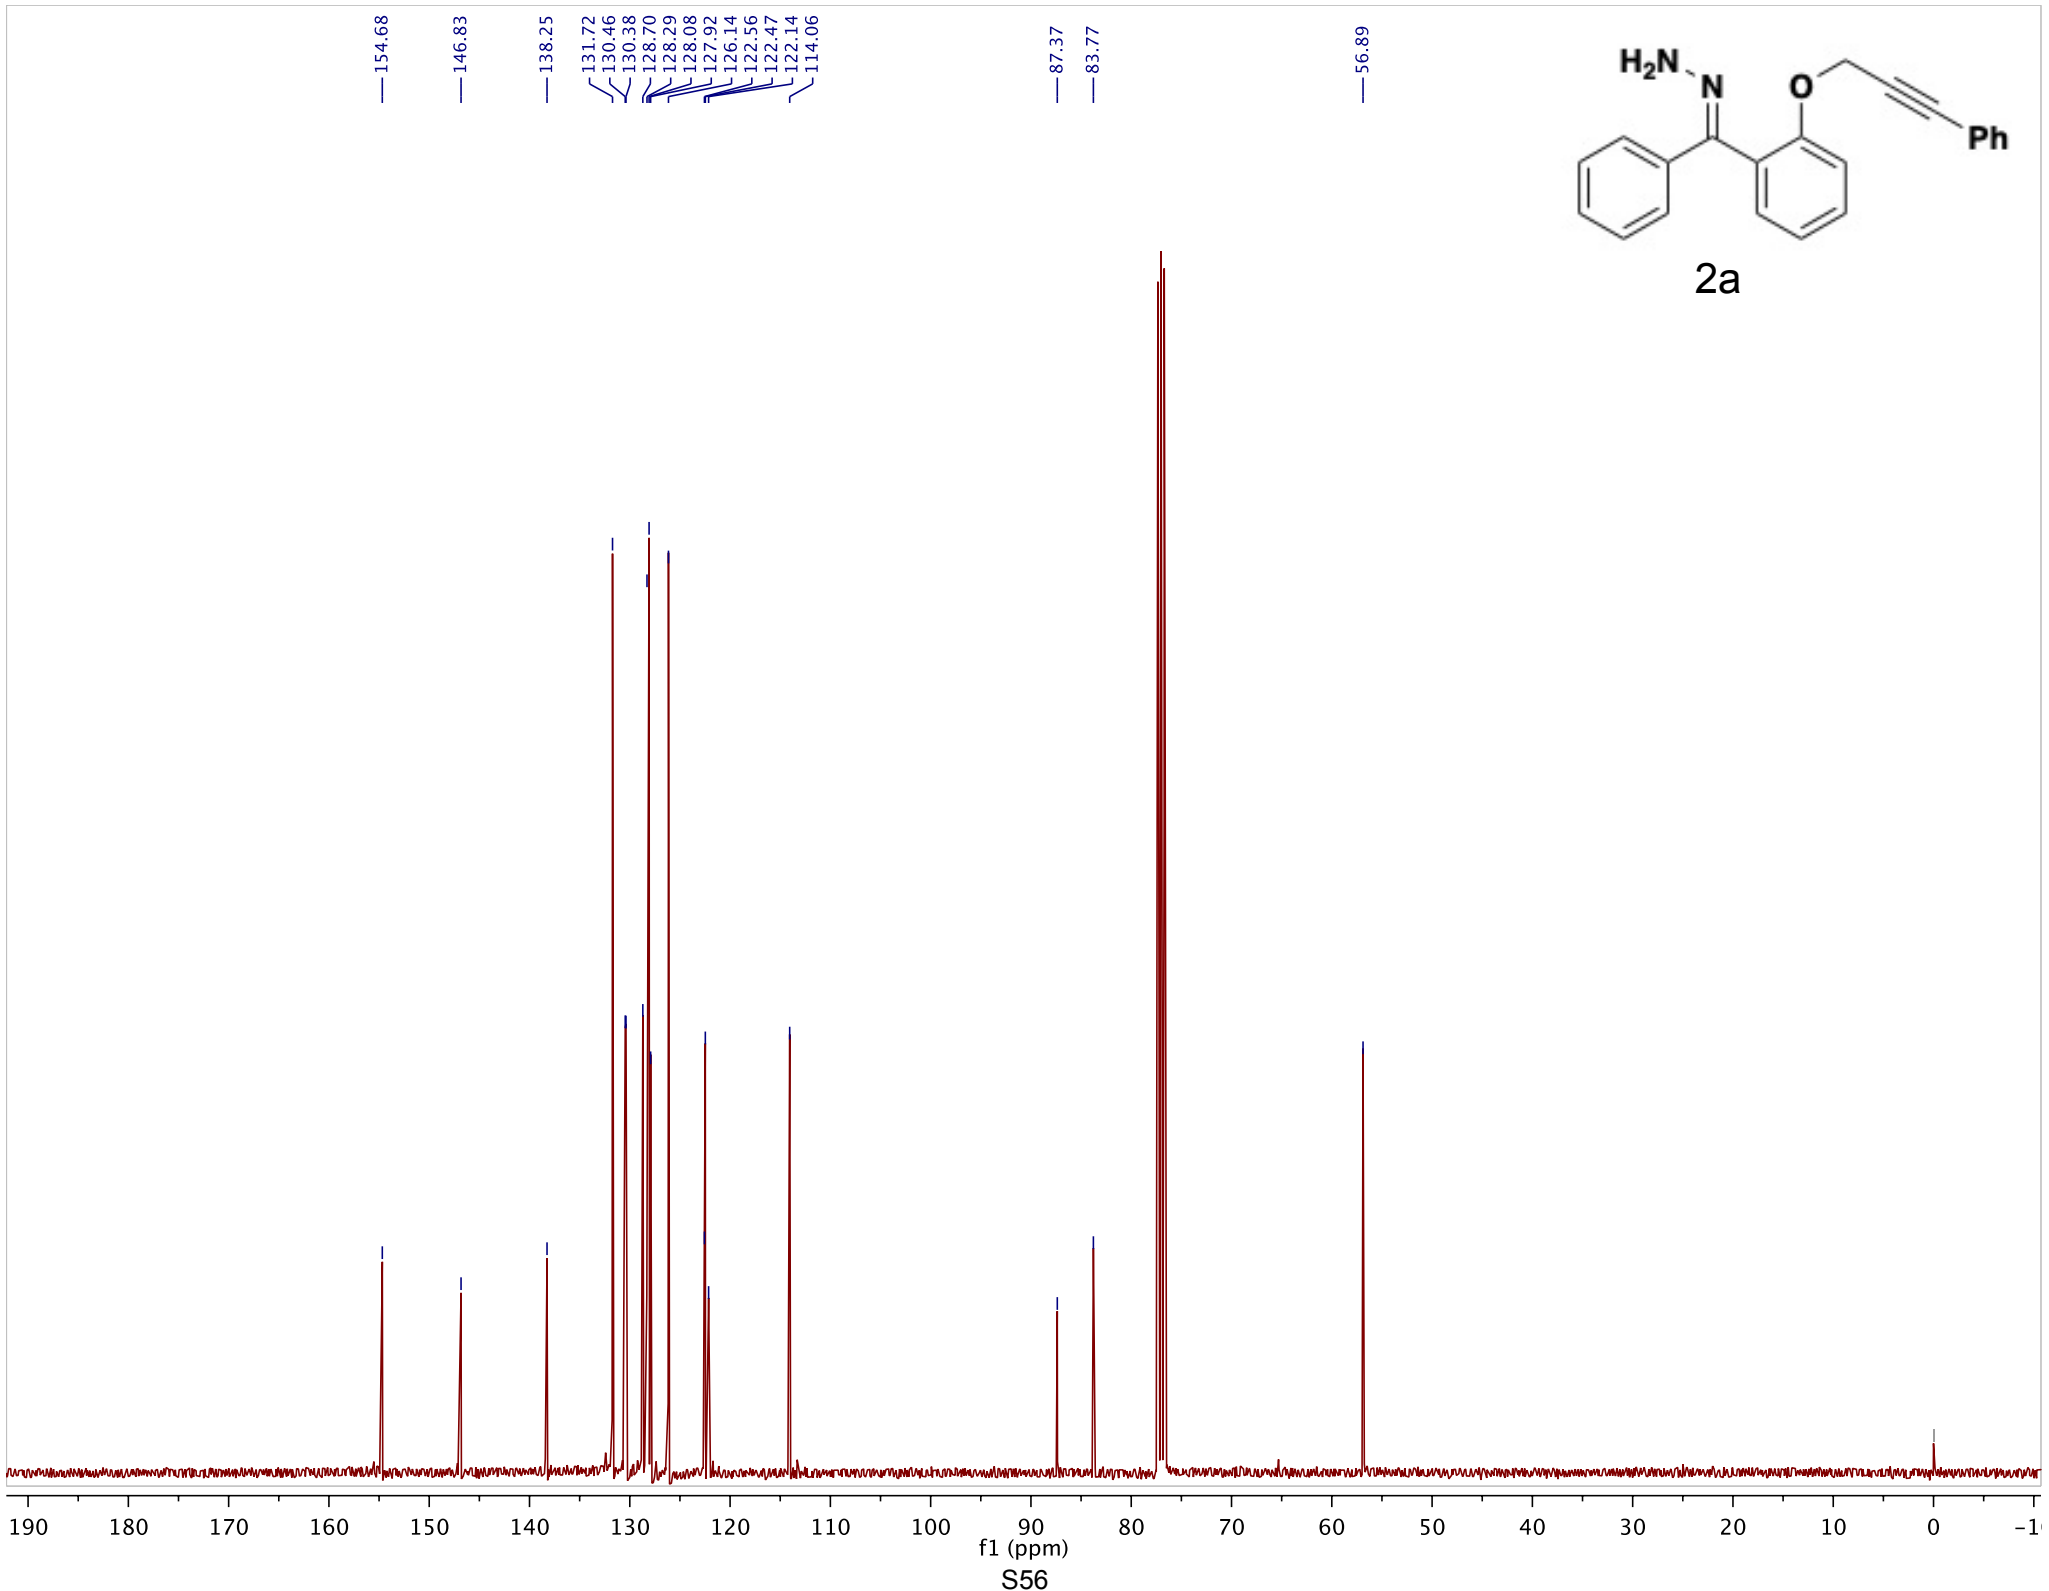



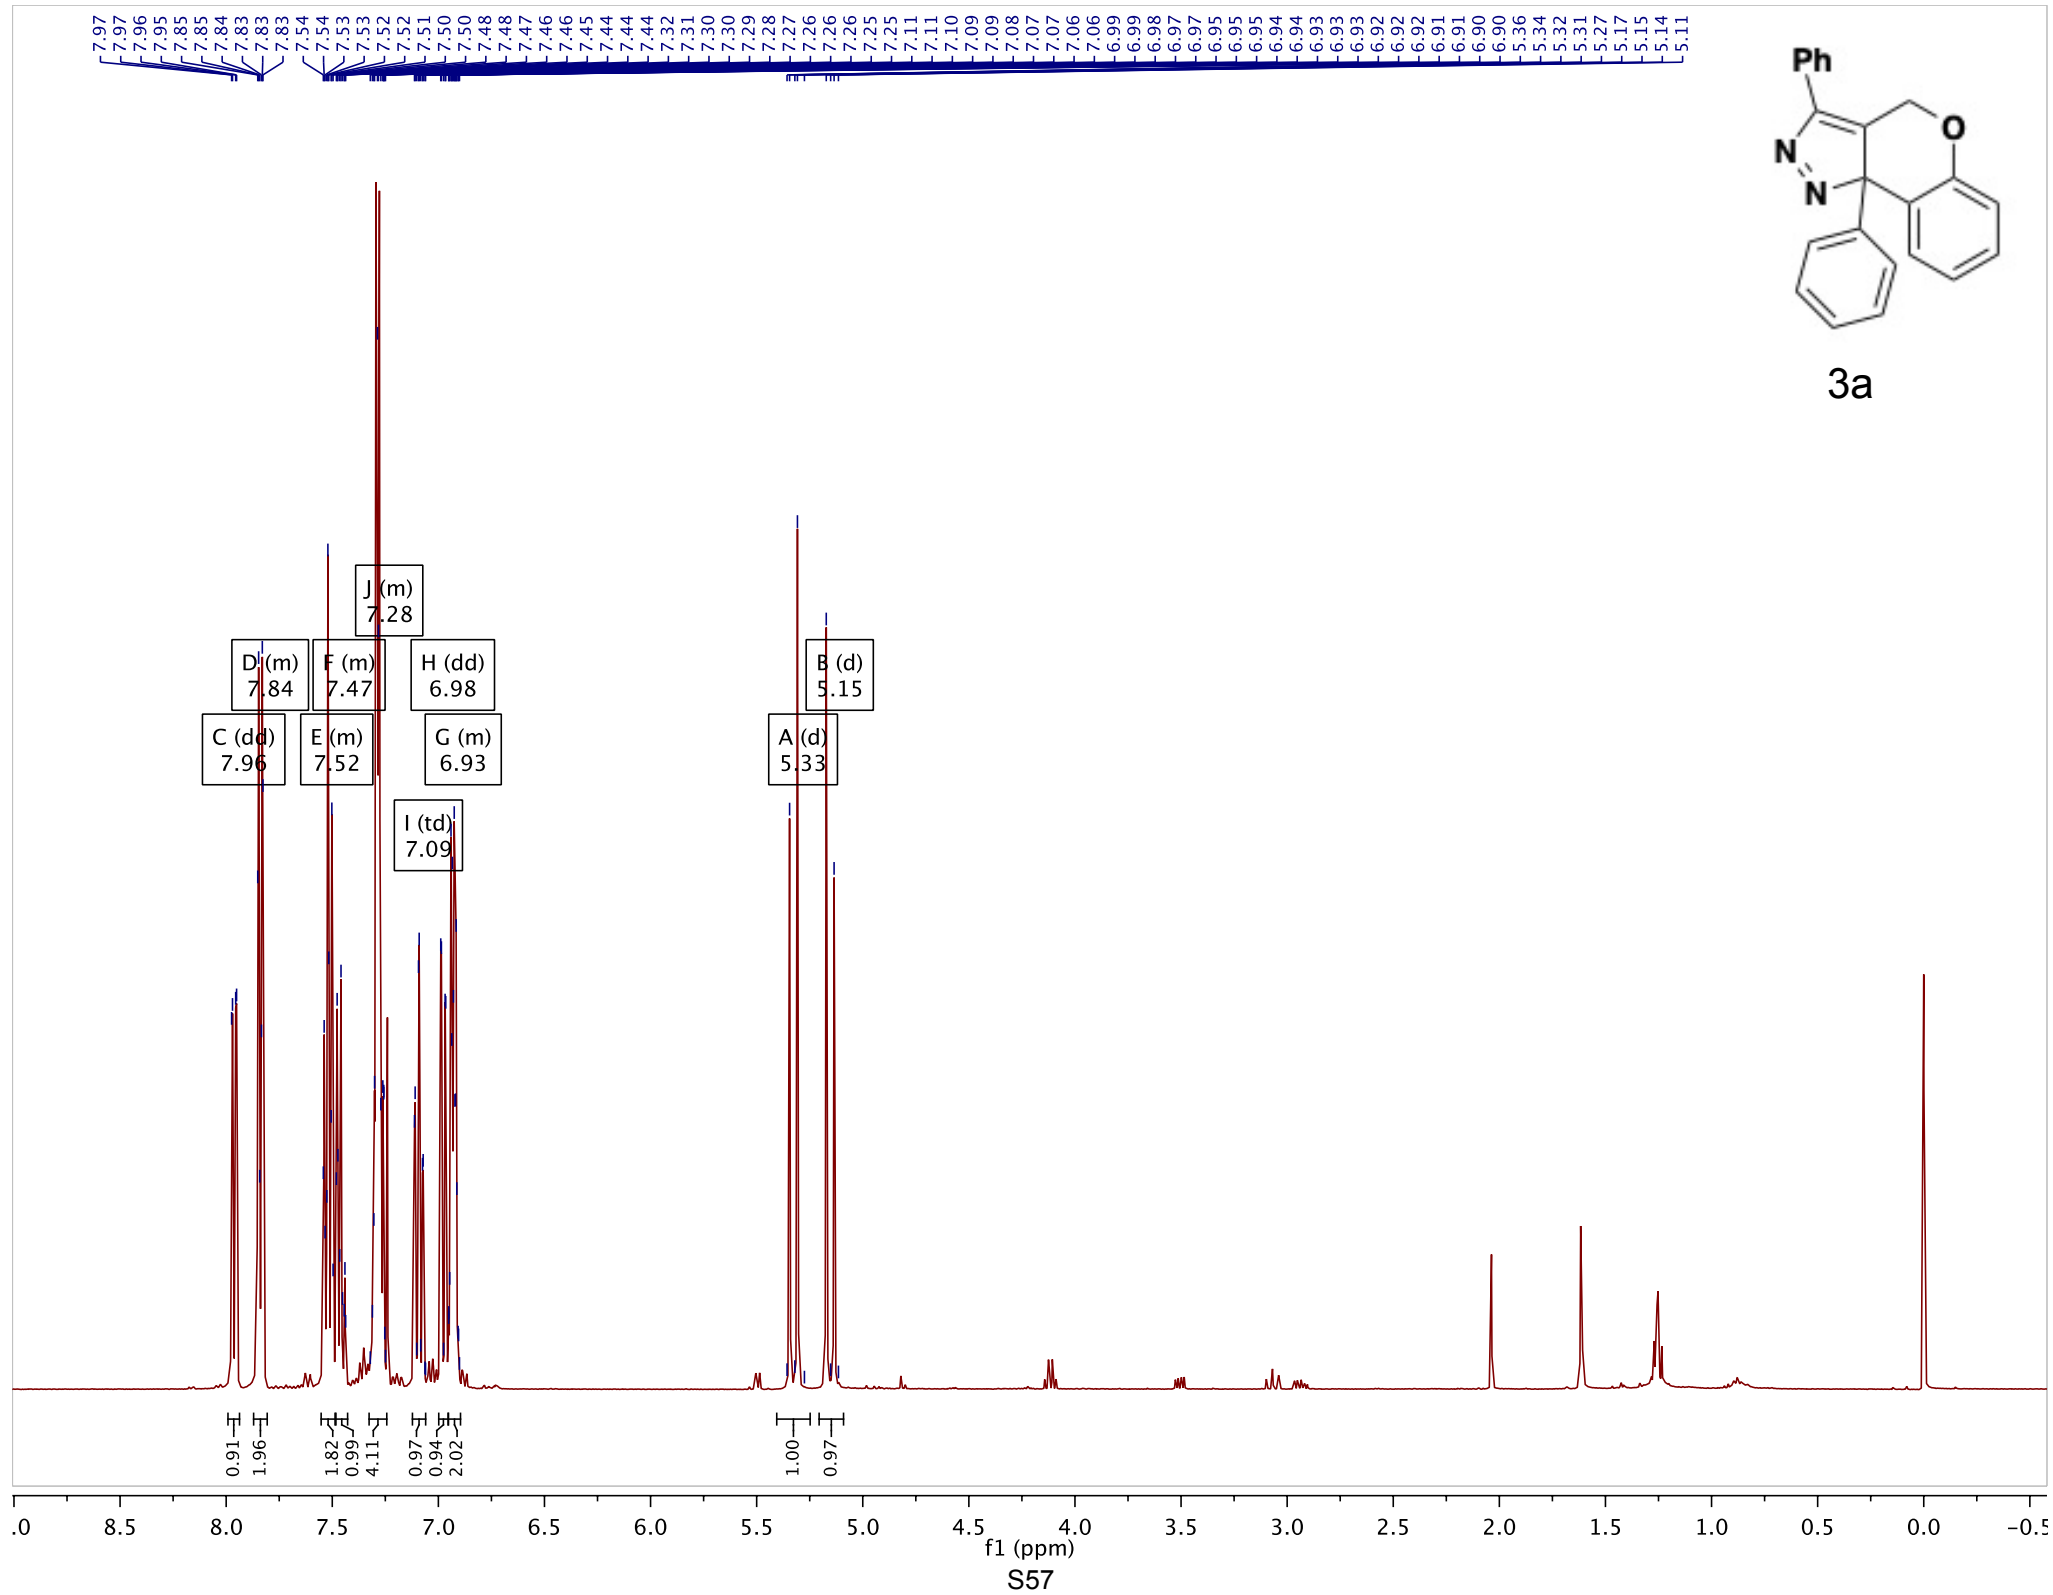

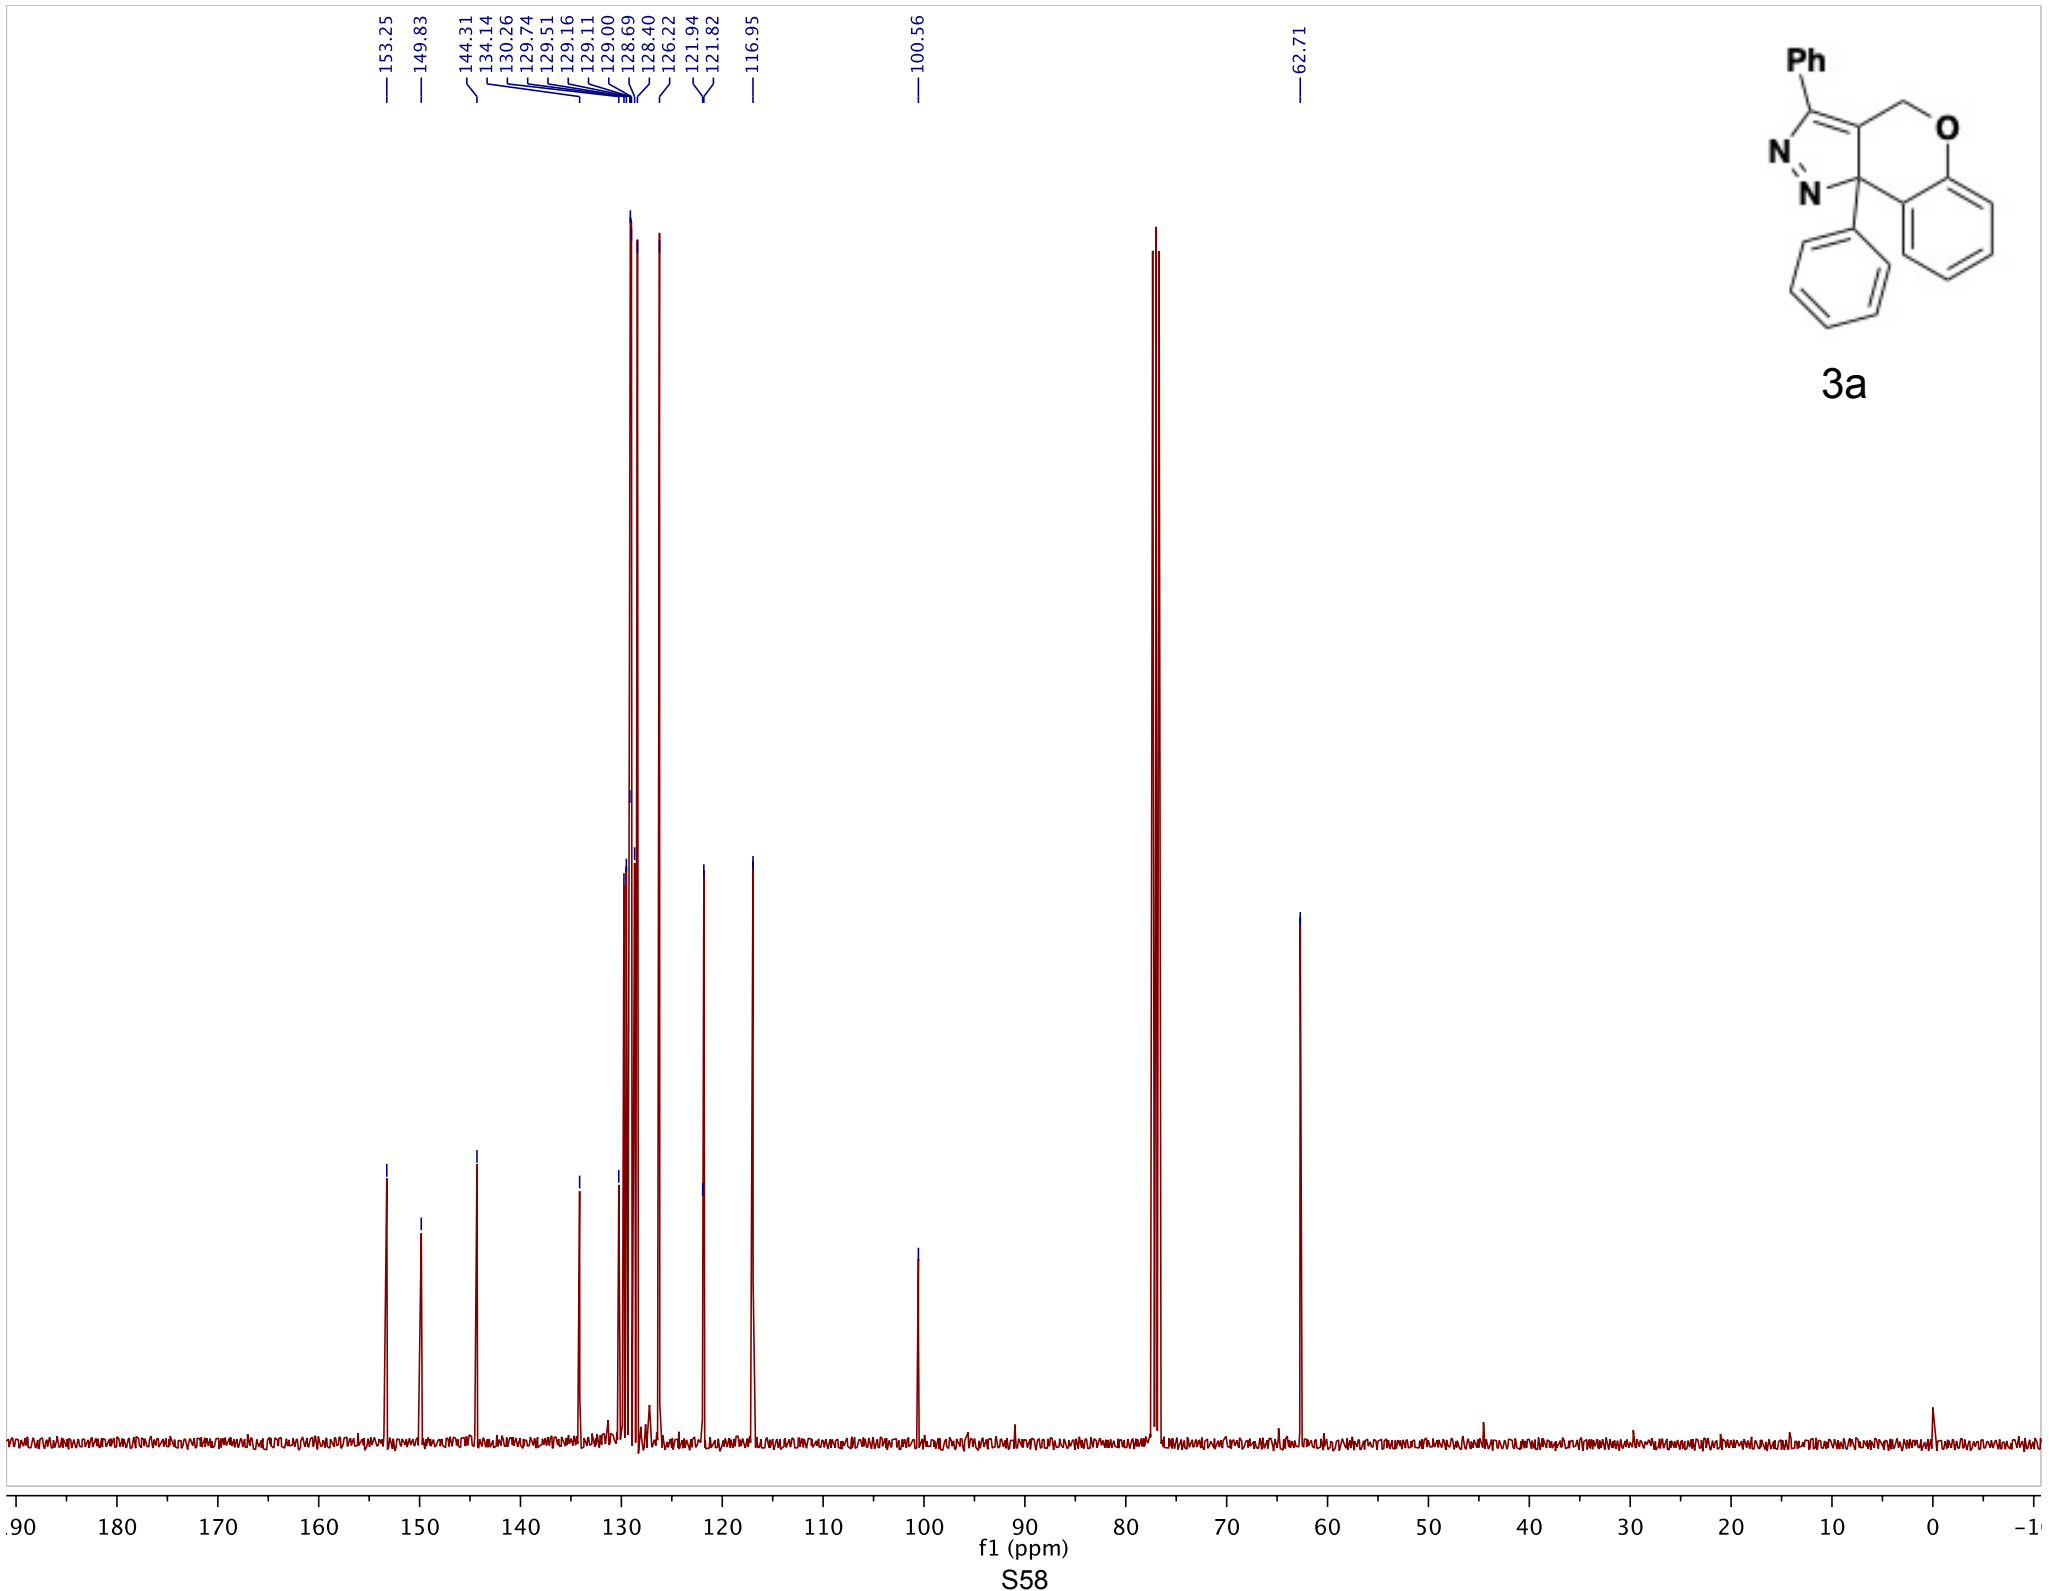

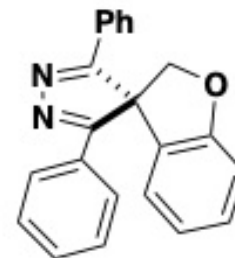

4a

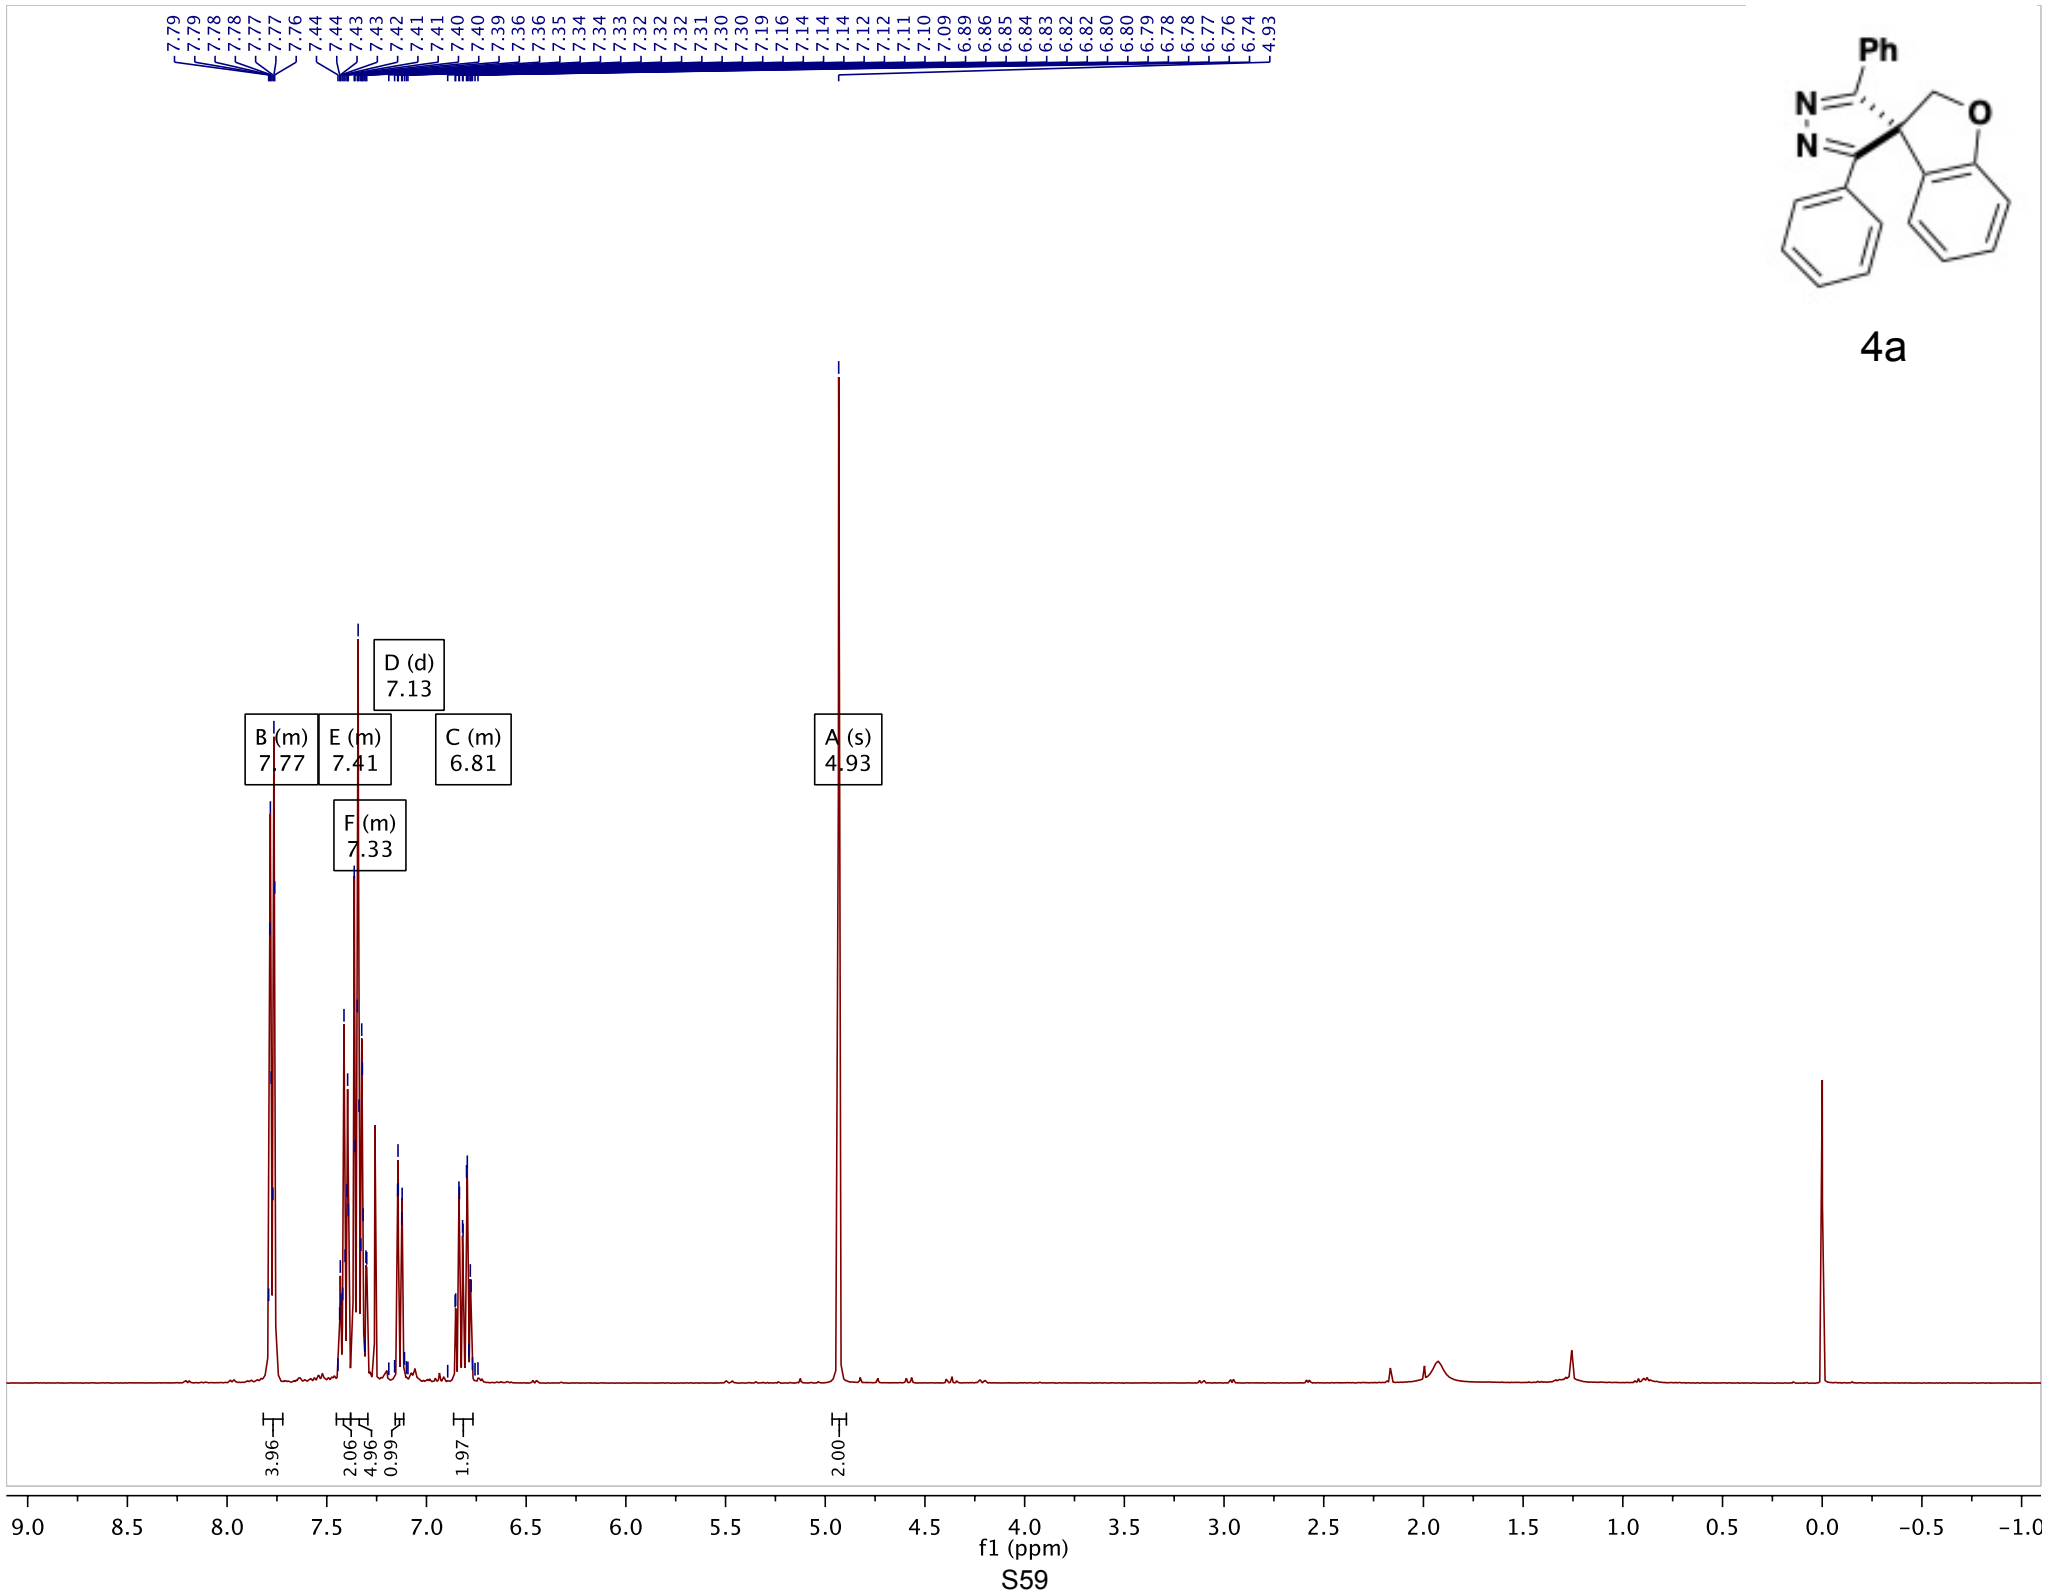

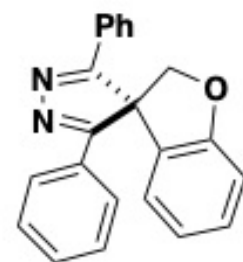

4a

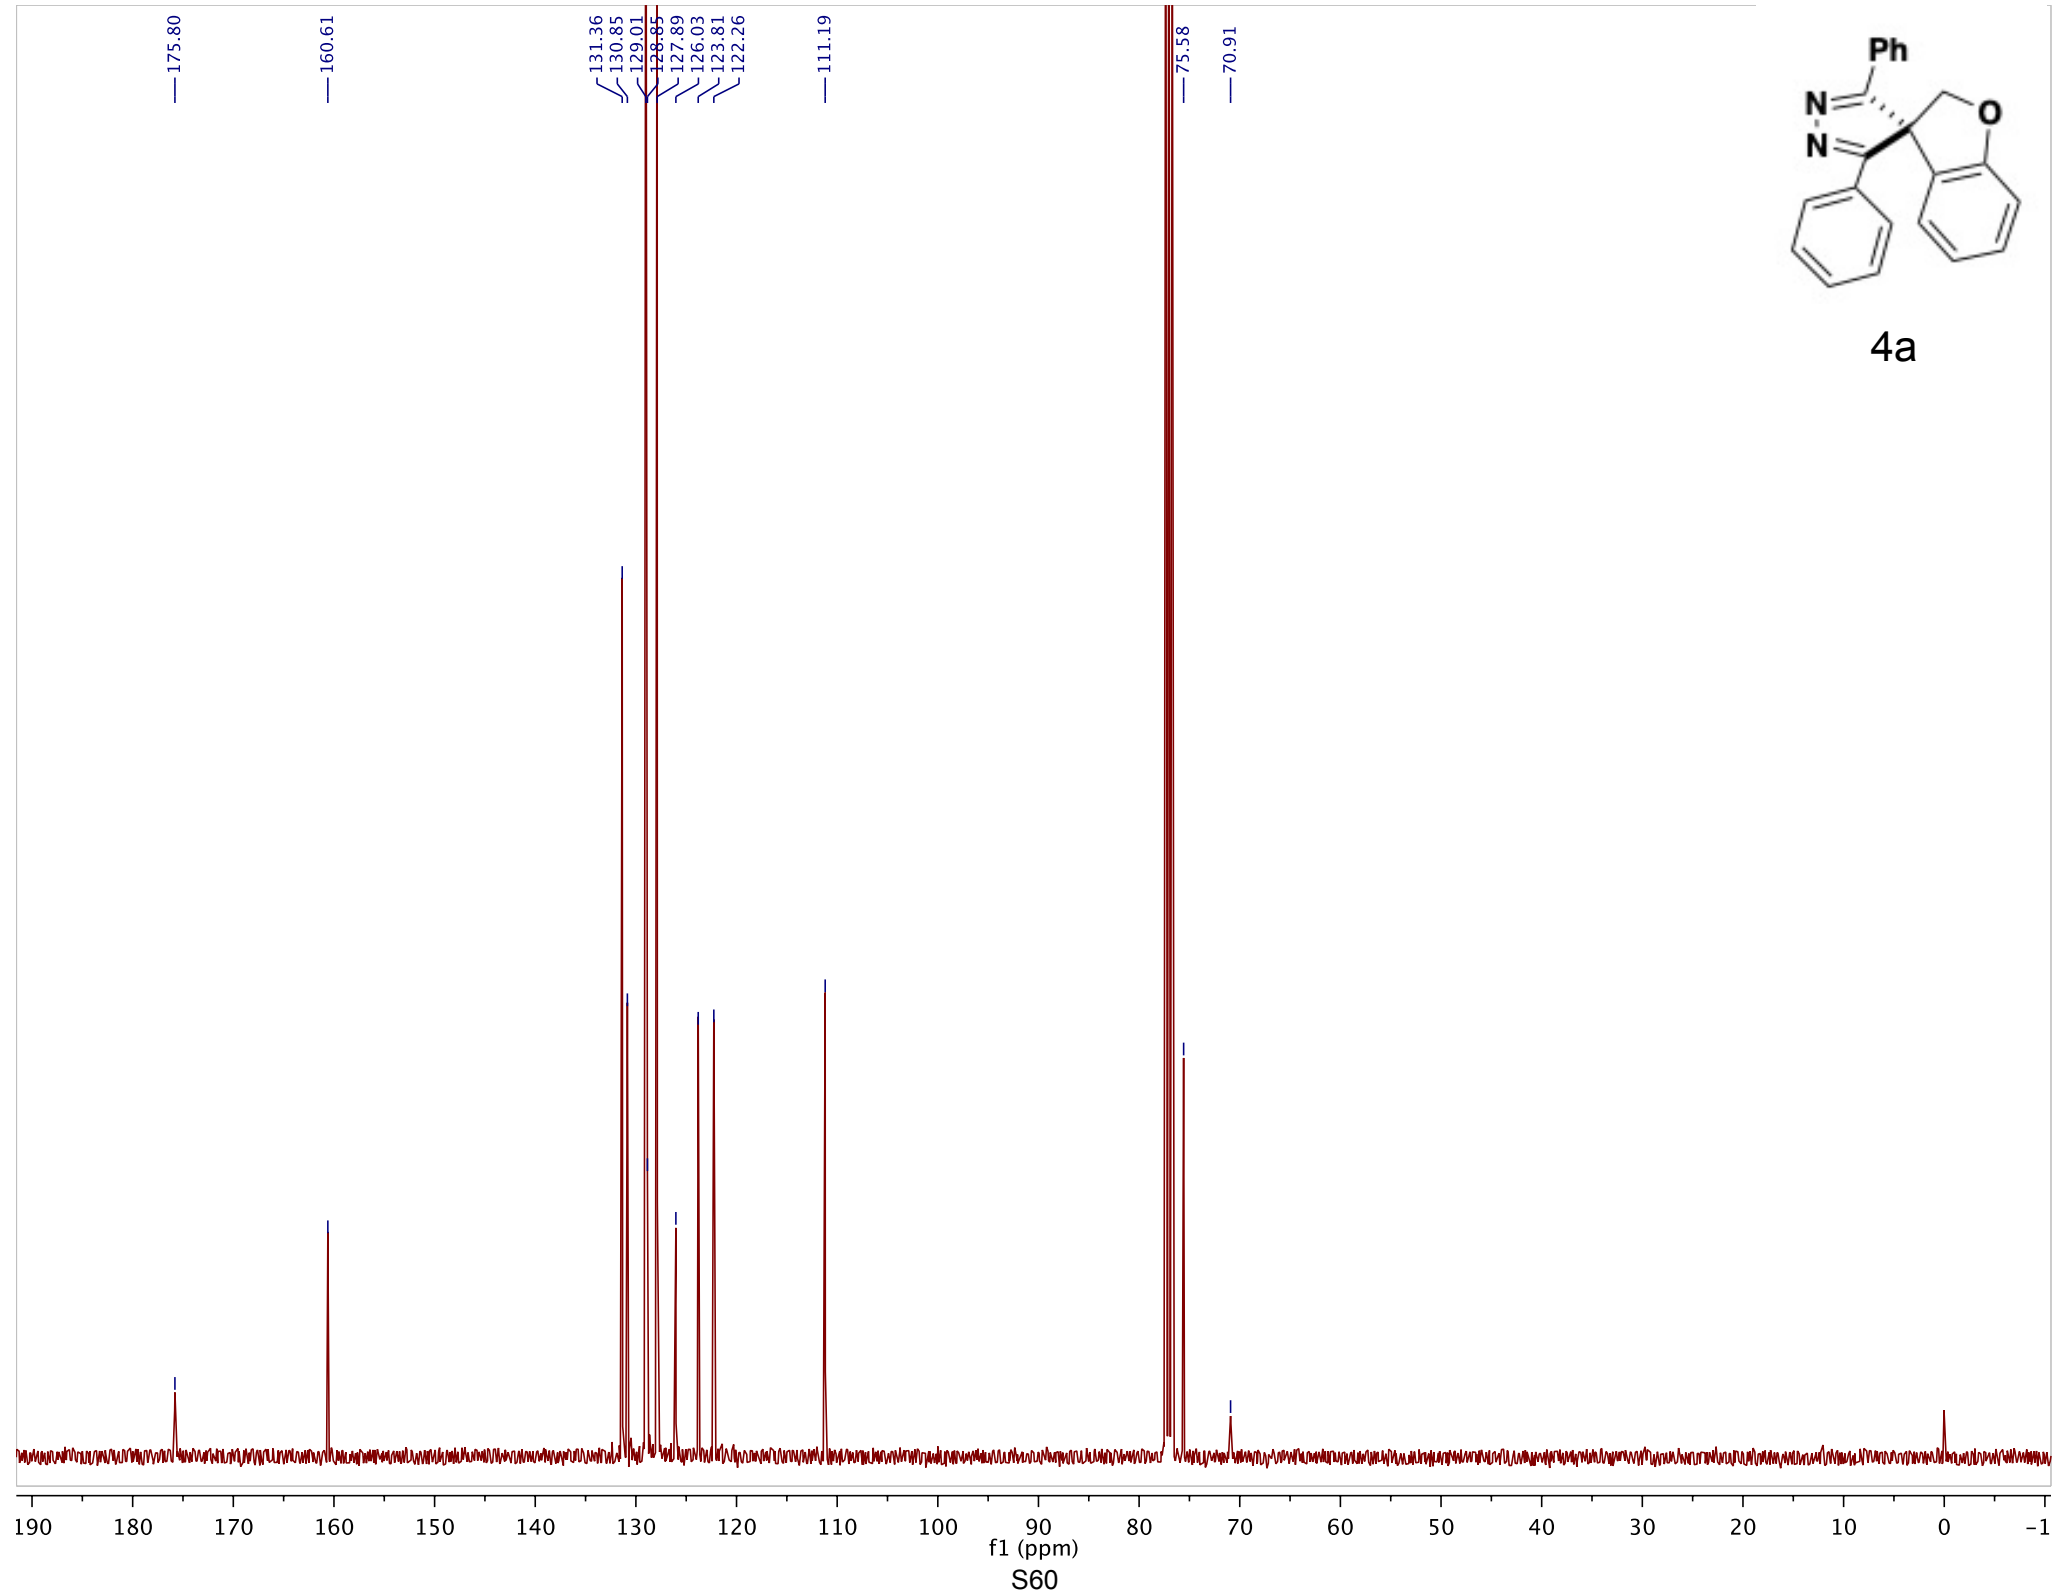

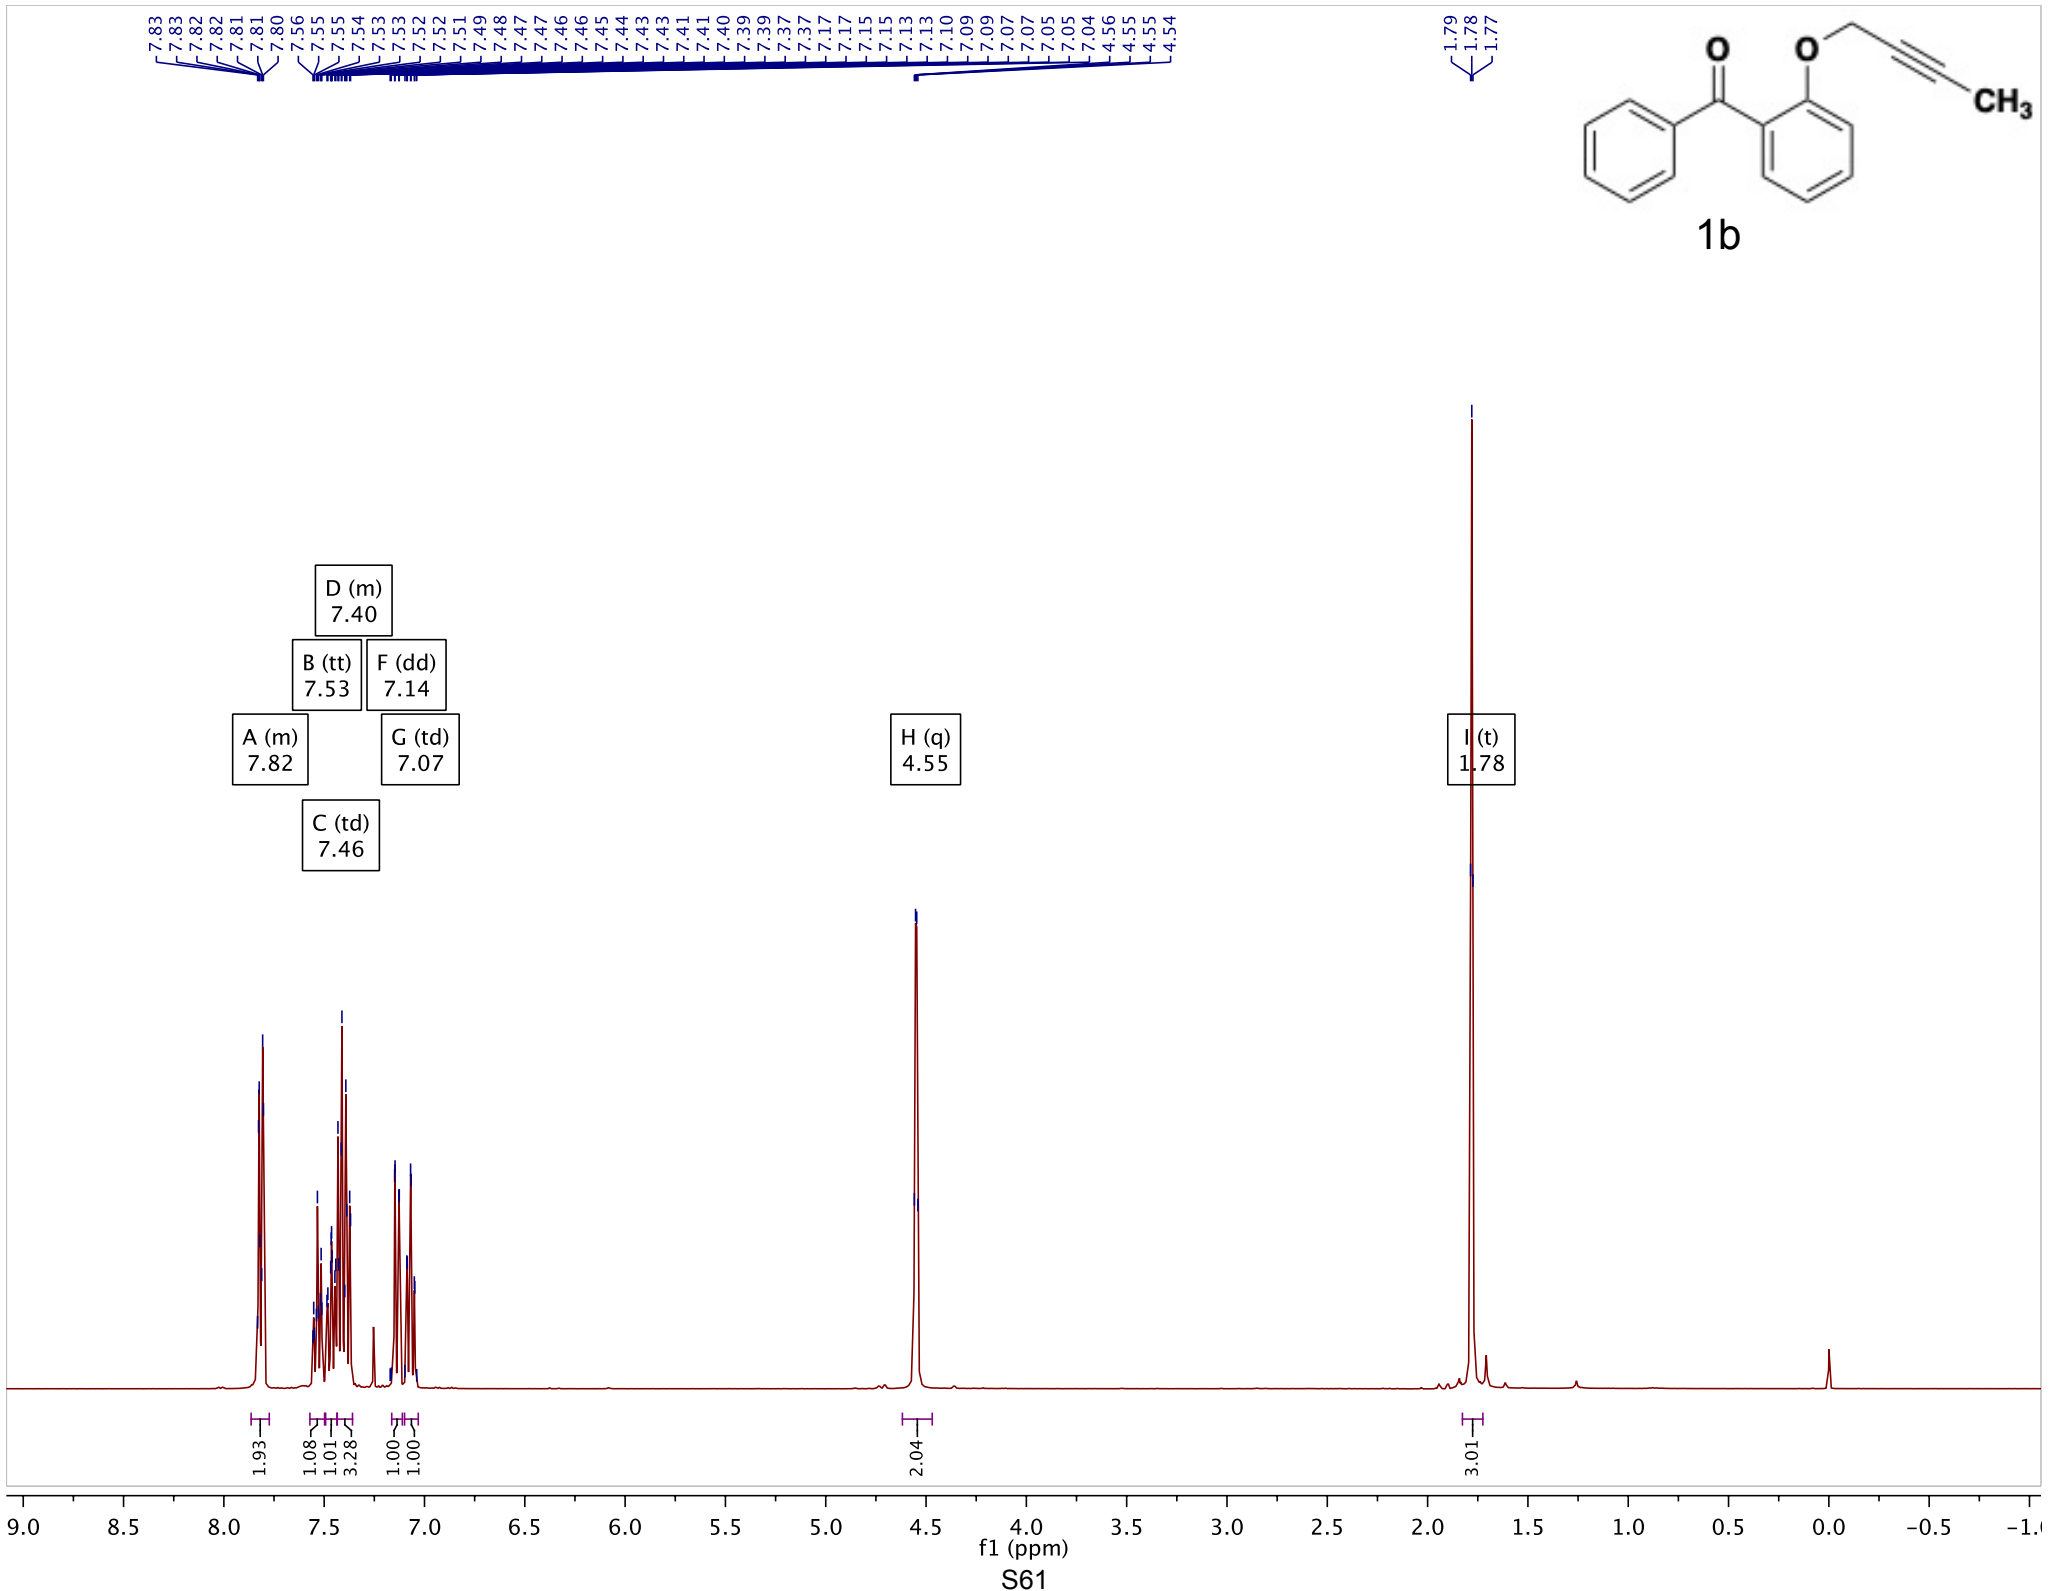

— 196.30

— 155.66

— 137.84

— 132.95

— 131.79

— 129.99

— 129.78

— 129.59

— 128.24

— 121.25

— 113.56

— 84.02

— 73.76

— 56.97

— 3.72

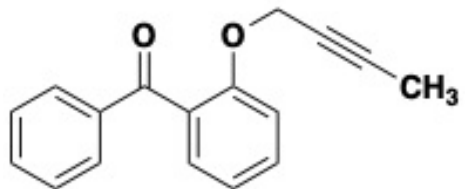

1b

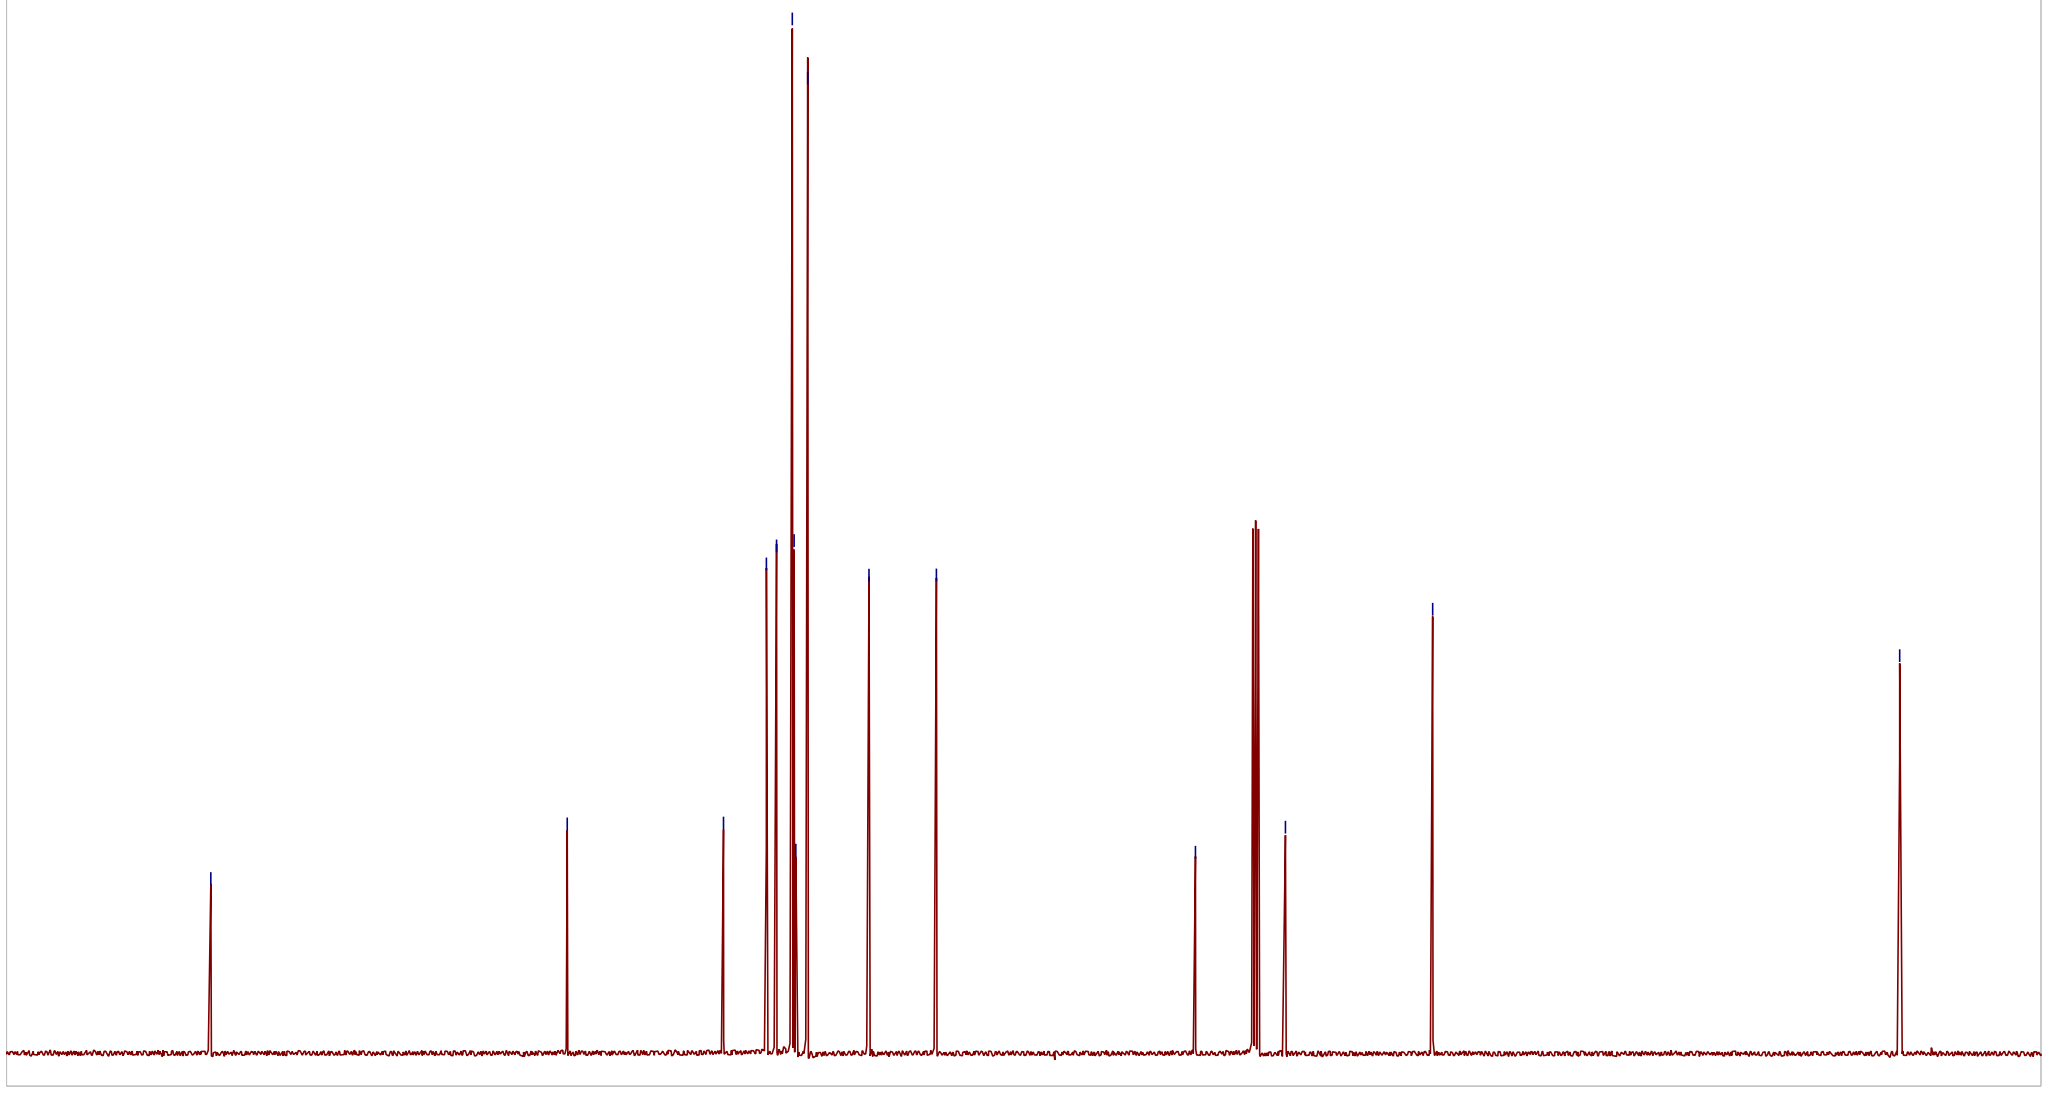

f1 (ppm)  
S62

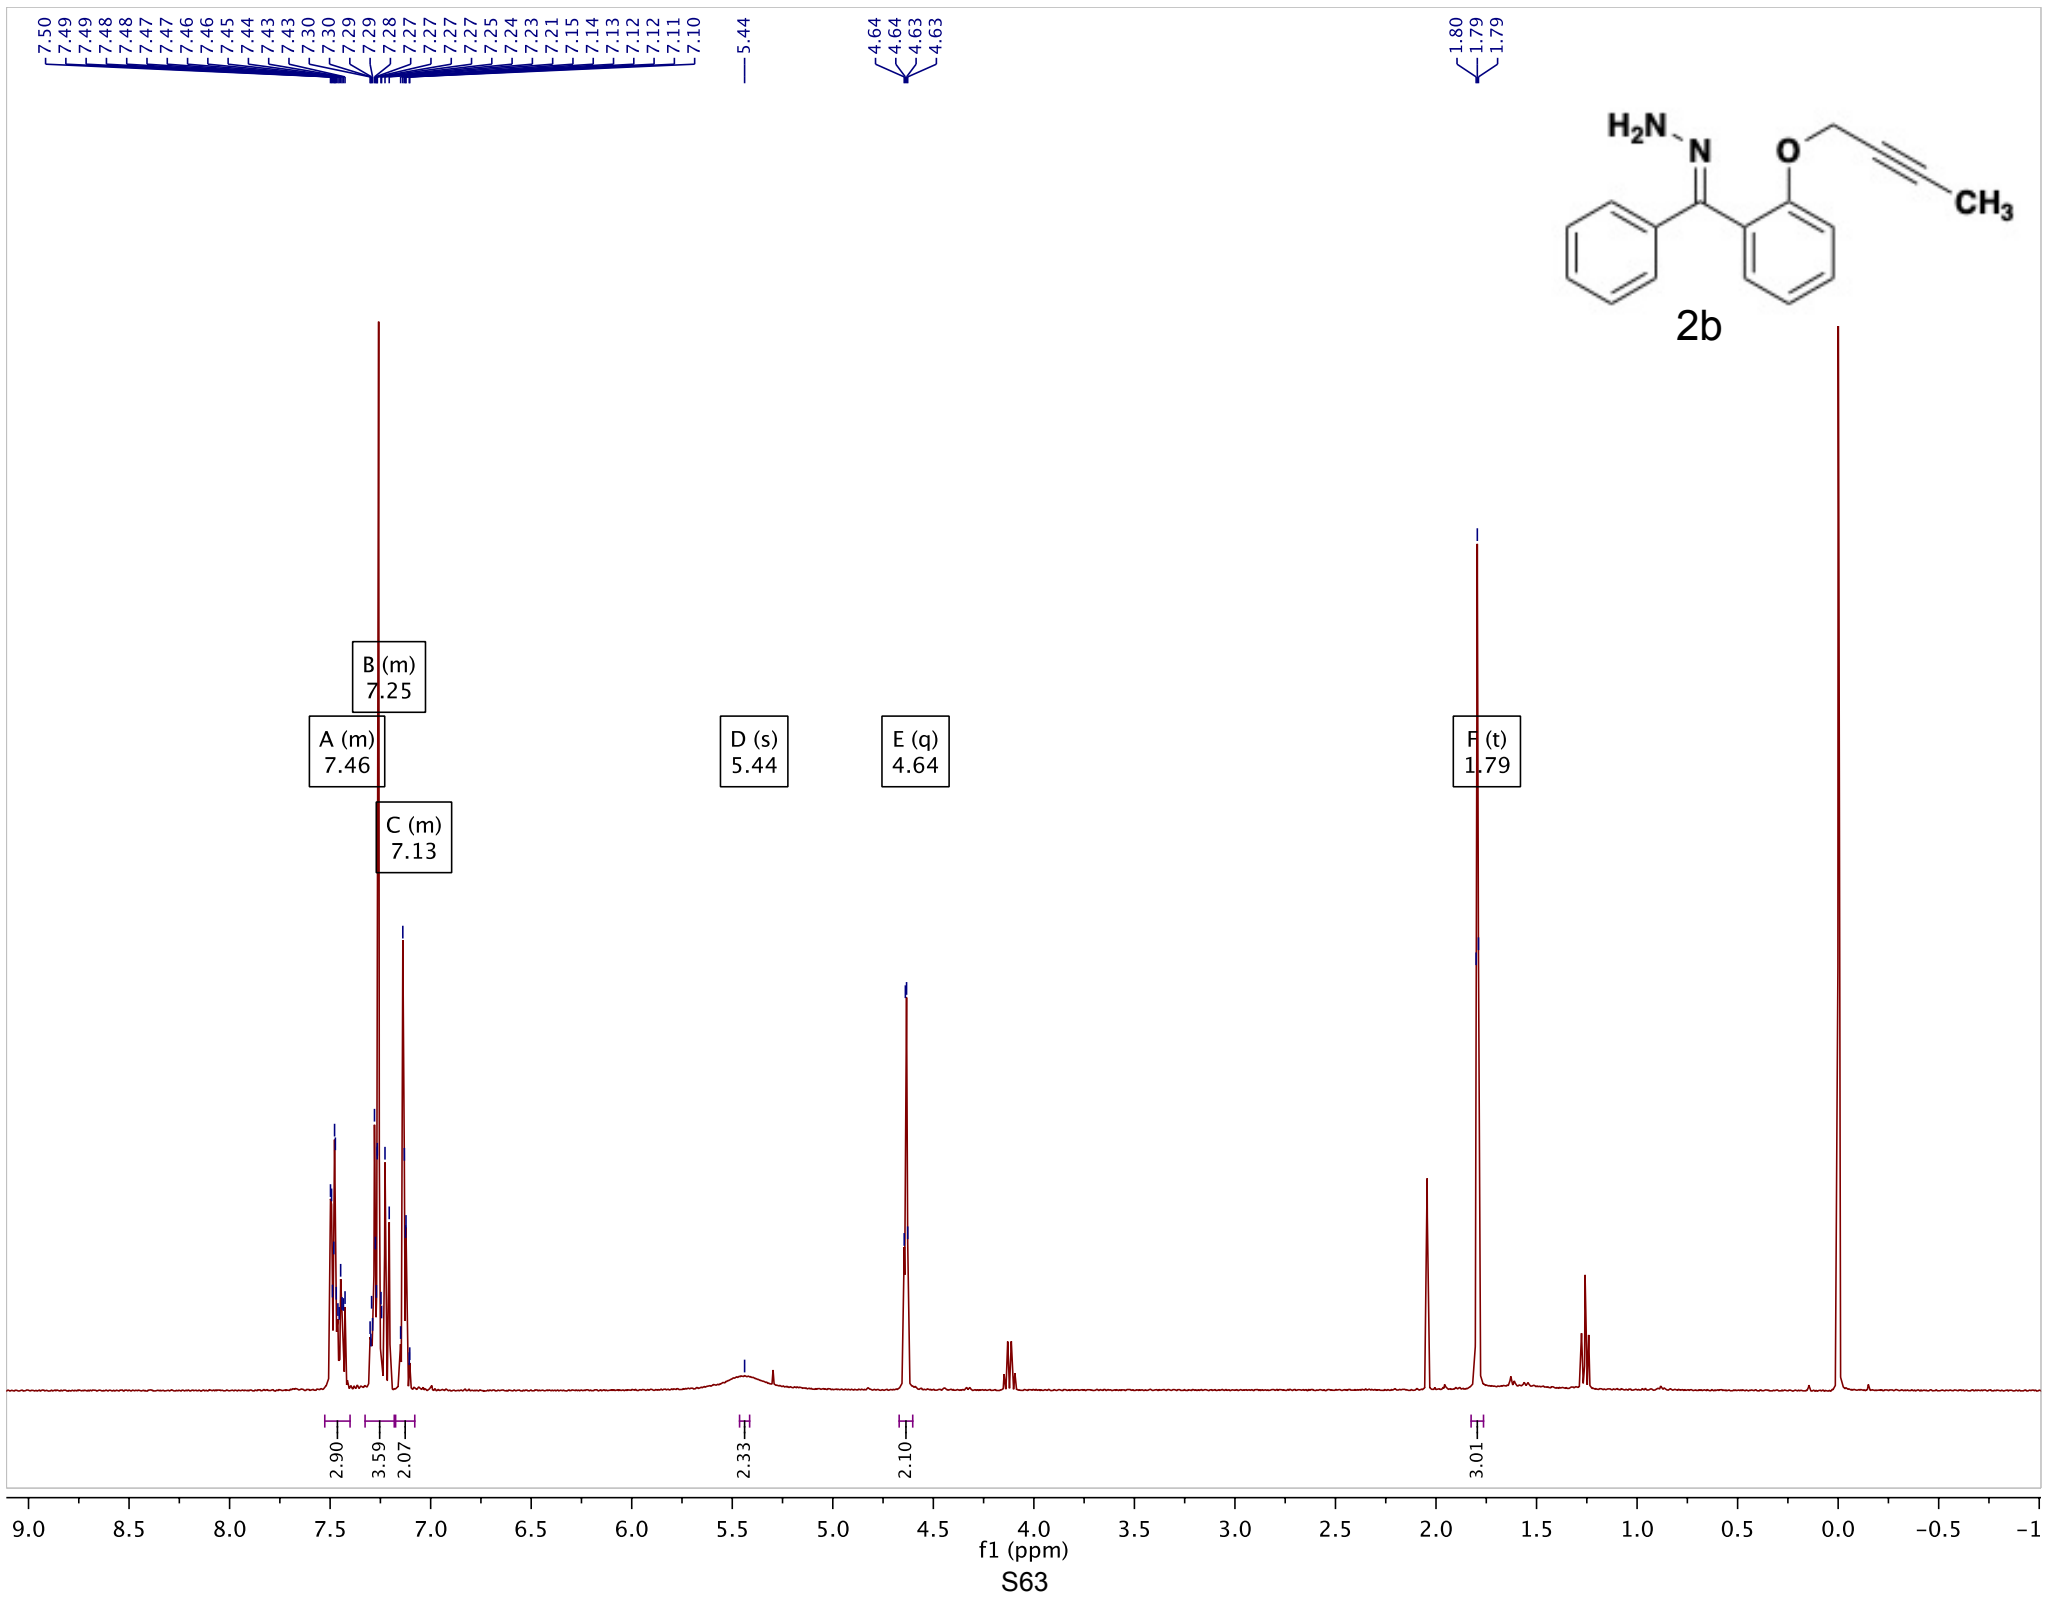

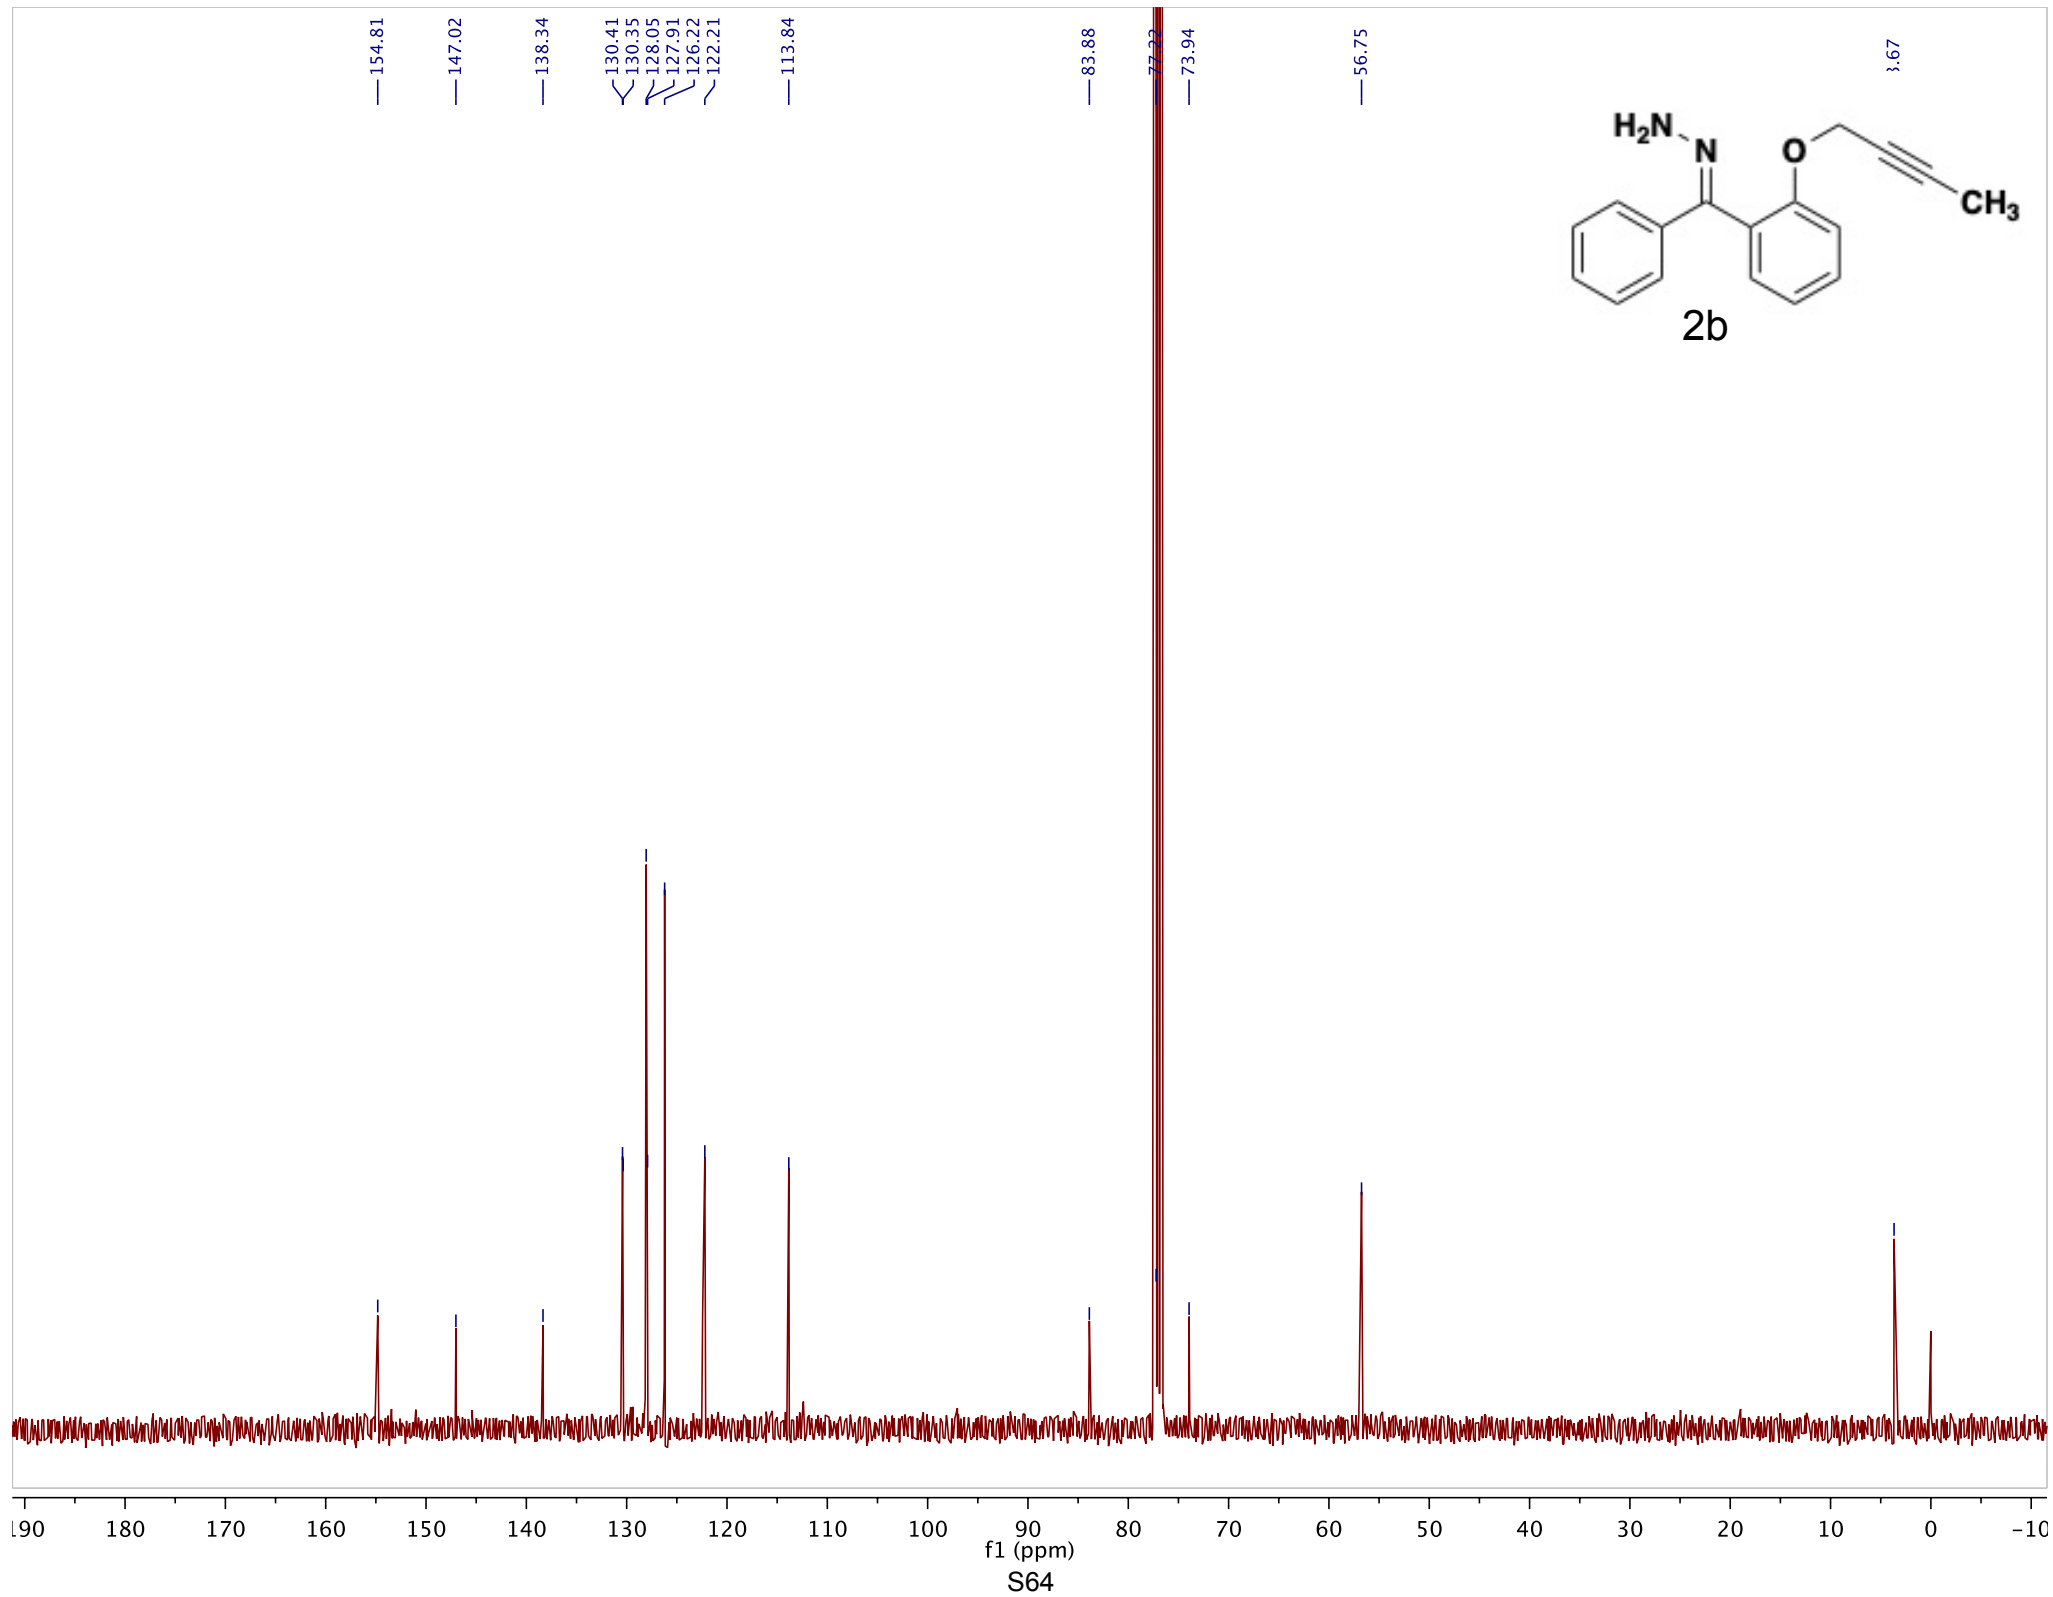



7.91  
7.89  
7.89  
7.31  
7.30  
7.29  
7.28  
7.27  
7.26  
7.25  
7.09  
7.08  
7.07  
7.07  
7.06  
7.05  
7.05  
6.99  
6.99  
6.97  
6.97  
6.90  
6.90  
6.89  
6.89  
6.88  
6.88  
6.87  
6.87  
6.86  
6.86  
6.85  
6.85  
6.85  
5.07  
5.05  
5.03  
4.87  
4.87  
4.86  
4.86  
4.84  
4.84  
4.83  
4.83  
4.81

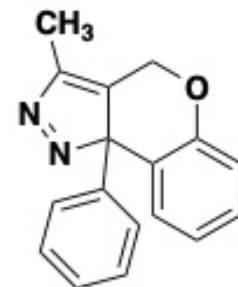

3b

D (dd)  
7.90

H (dd)  
7.30

E (td)  
7.07

G (m)  
6.87

F (dd)  
6.98

B (d)  
5.05

C (dq)  
4.85

A (d)  
2.52

0.99

4.12

1.07

1.01

1.92

1.04

1.05

3.09

9.0 8.5 8.0 7.5 7.0 6.5 6.0 5.5 5.0 4.5 4.0 3.5 3.0 2.5 2.0 1.5 1.0 0.5 0.0 -0.5 -1.0

f1 (ppm)

S65

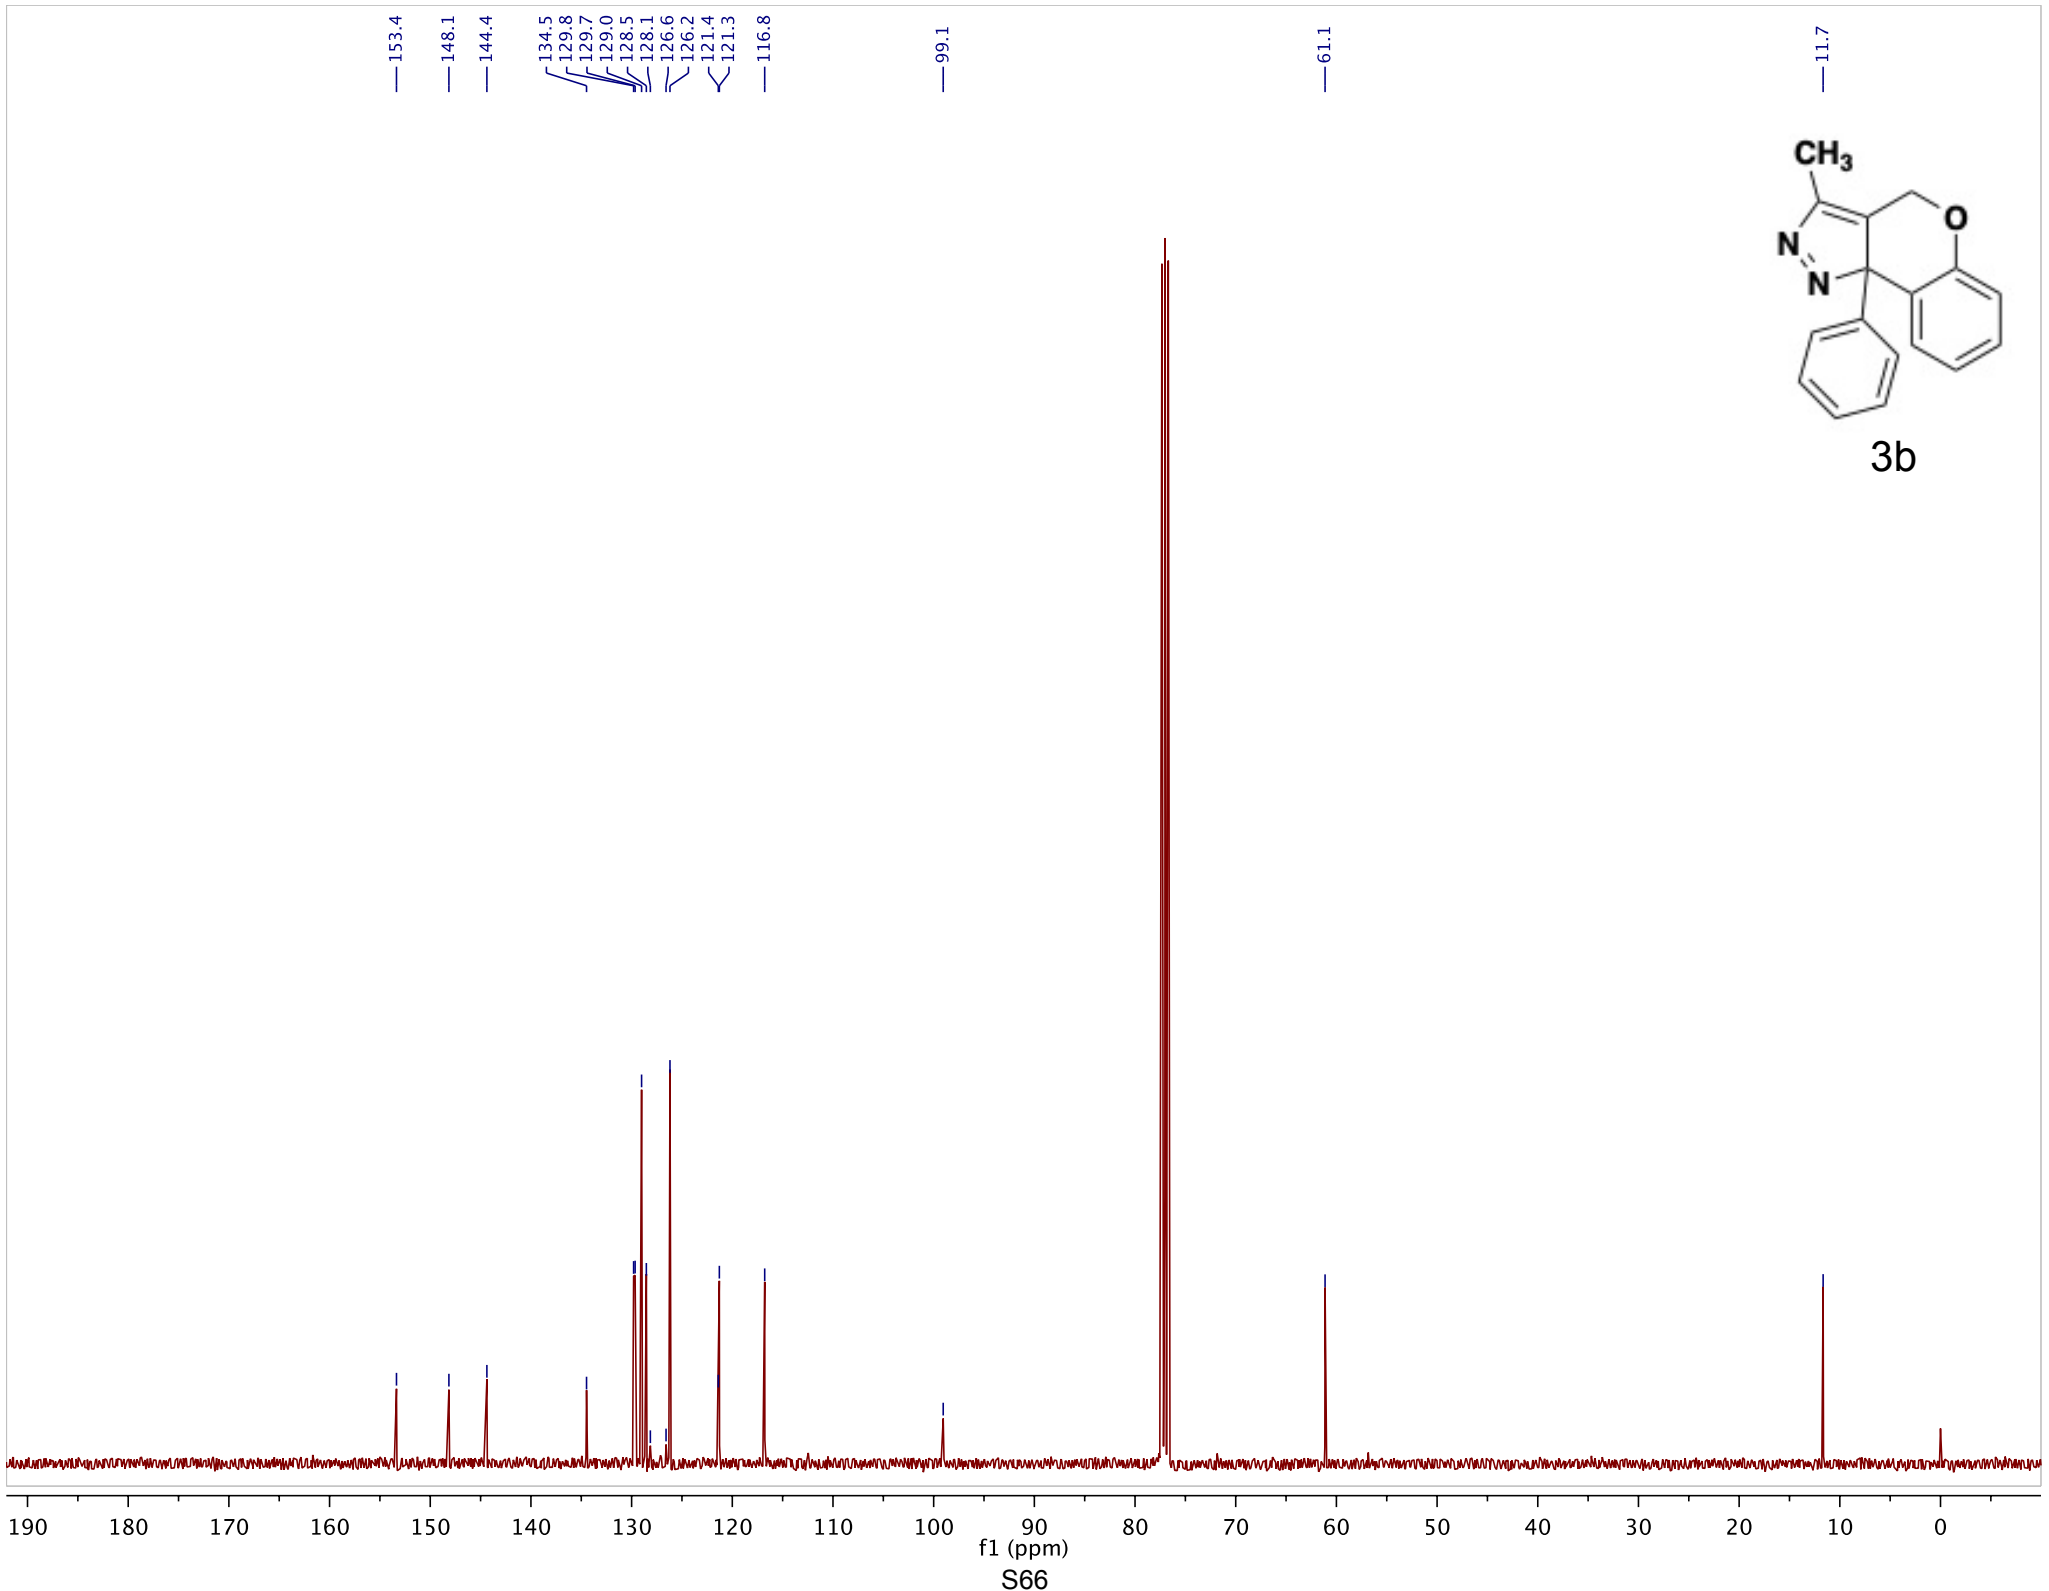

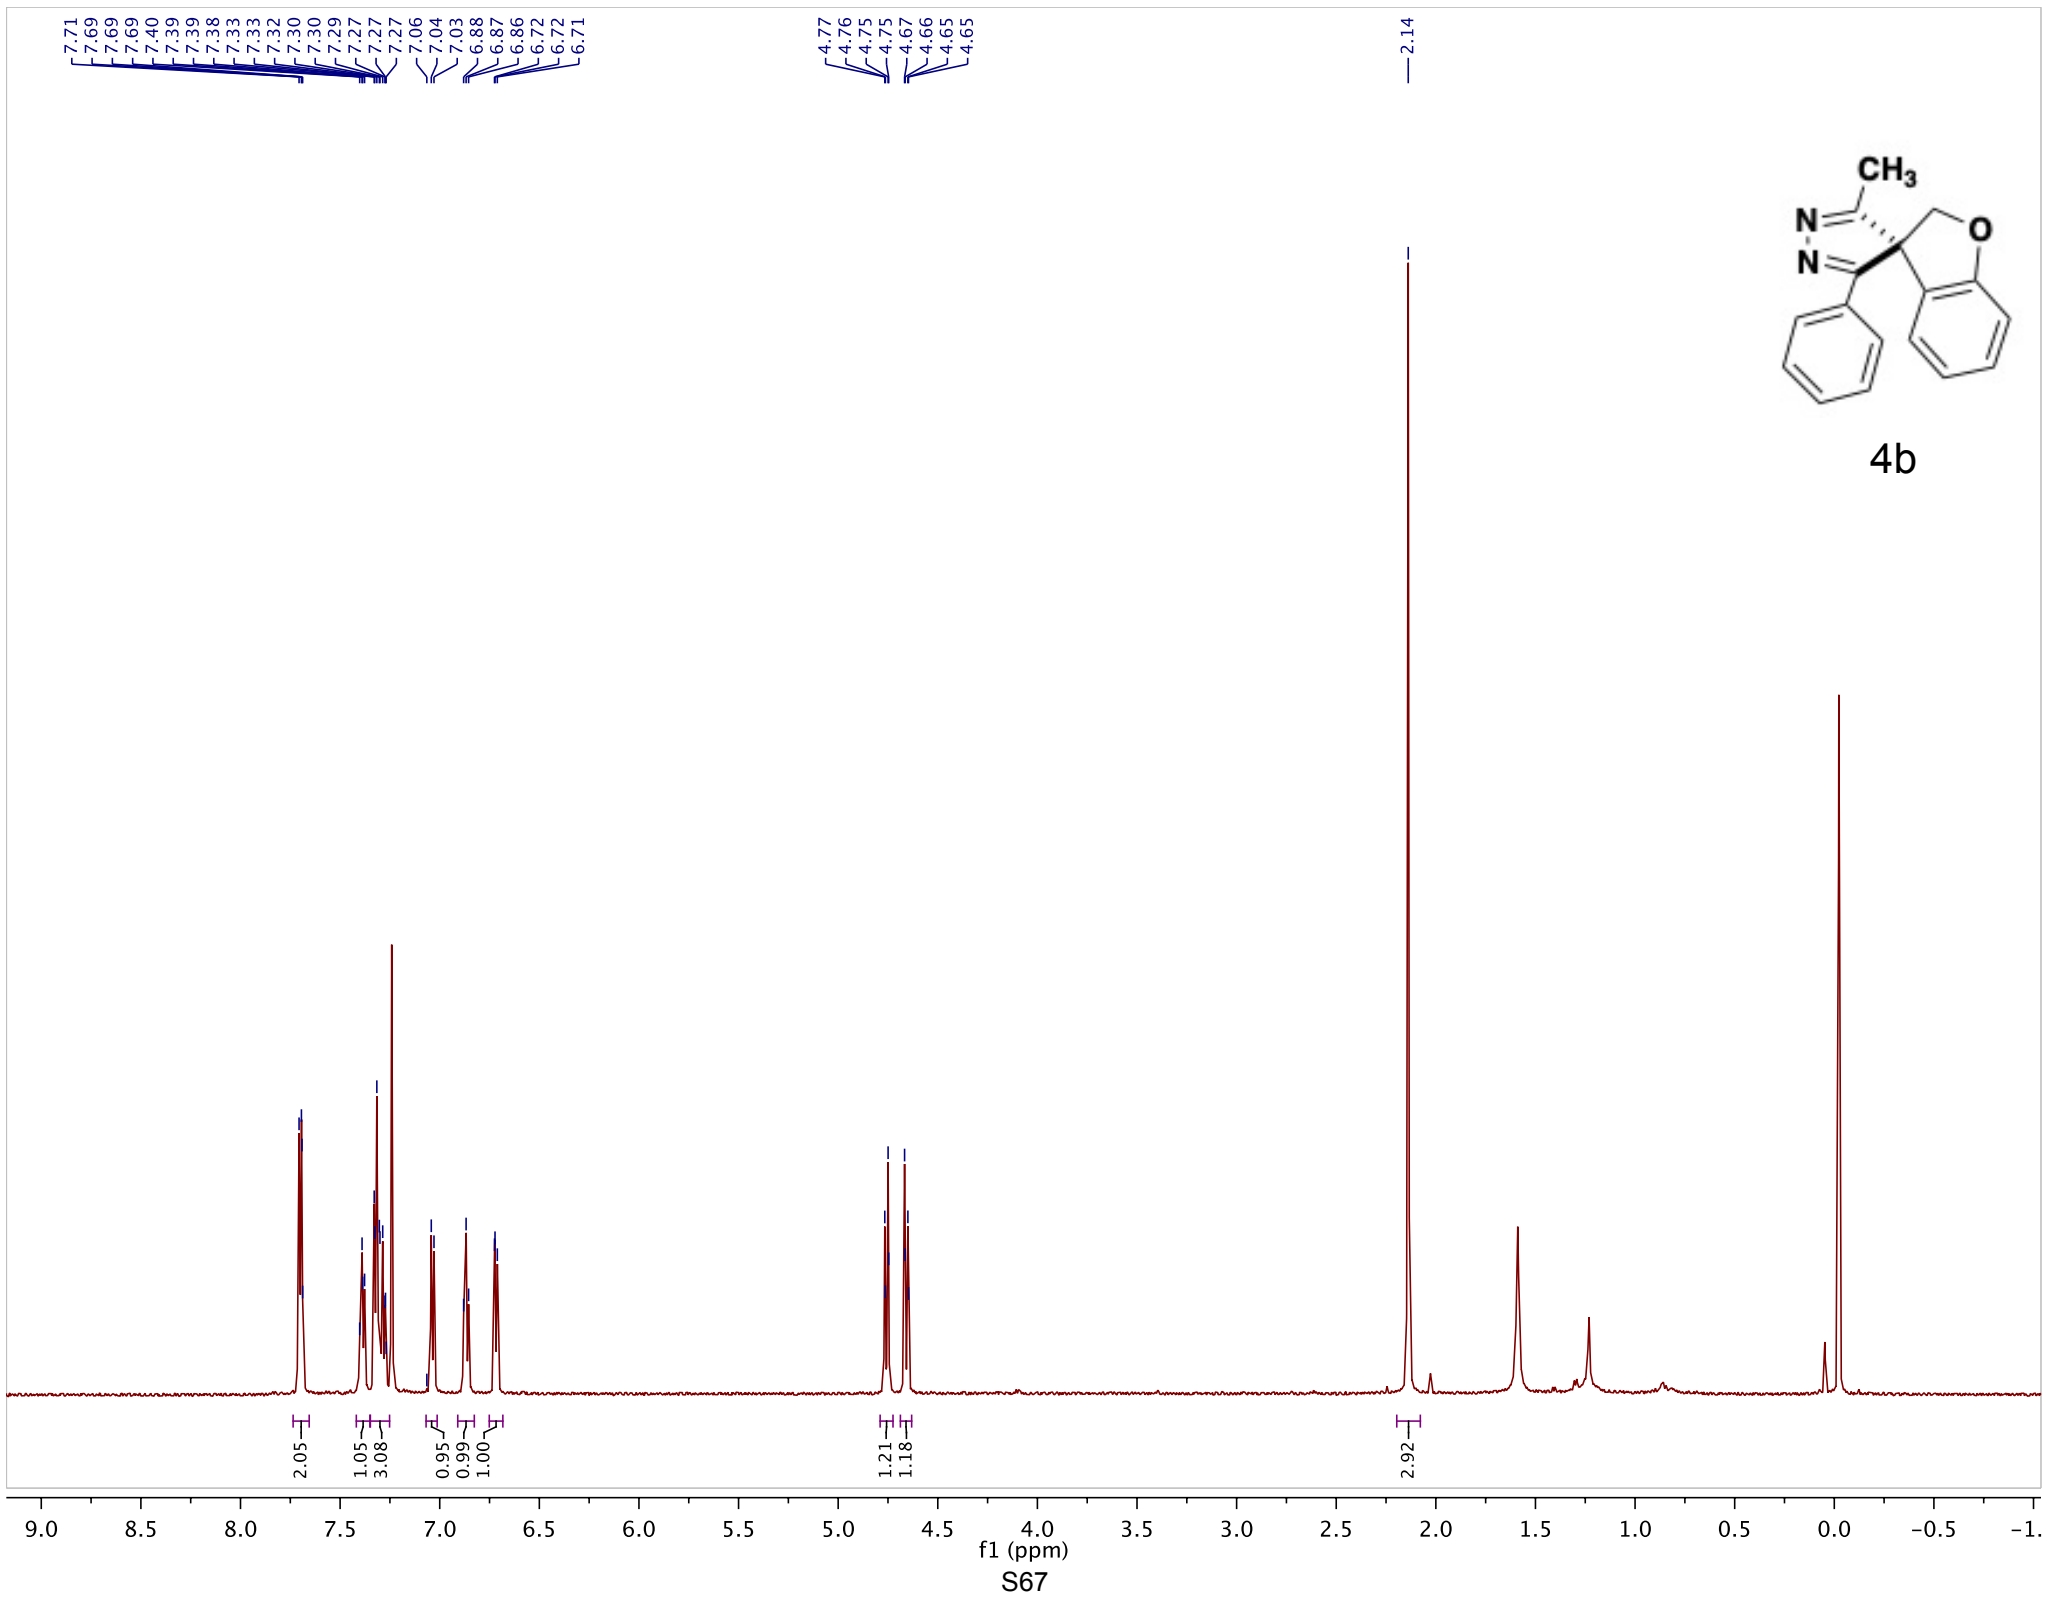

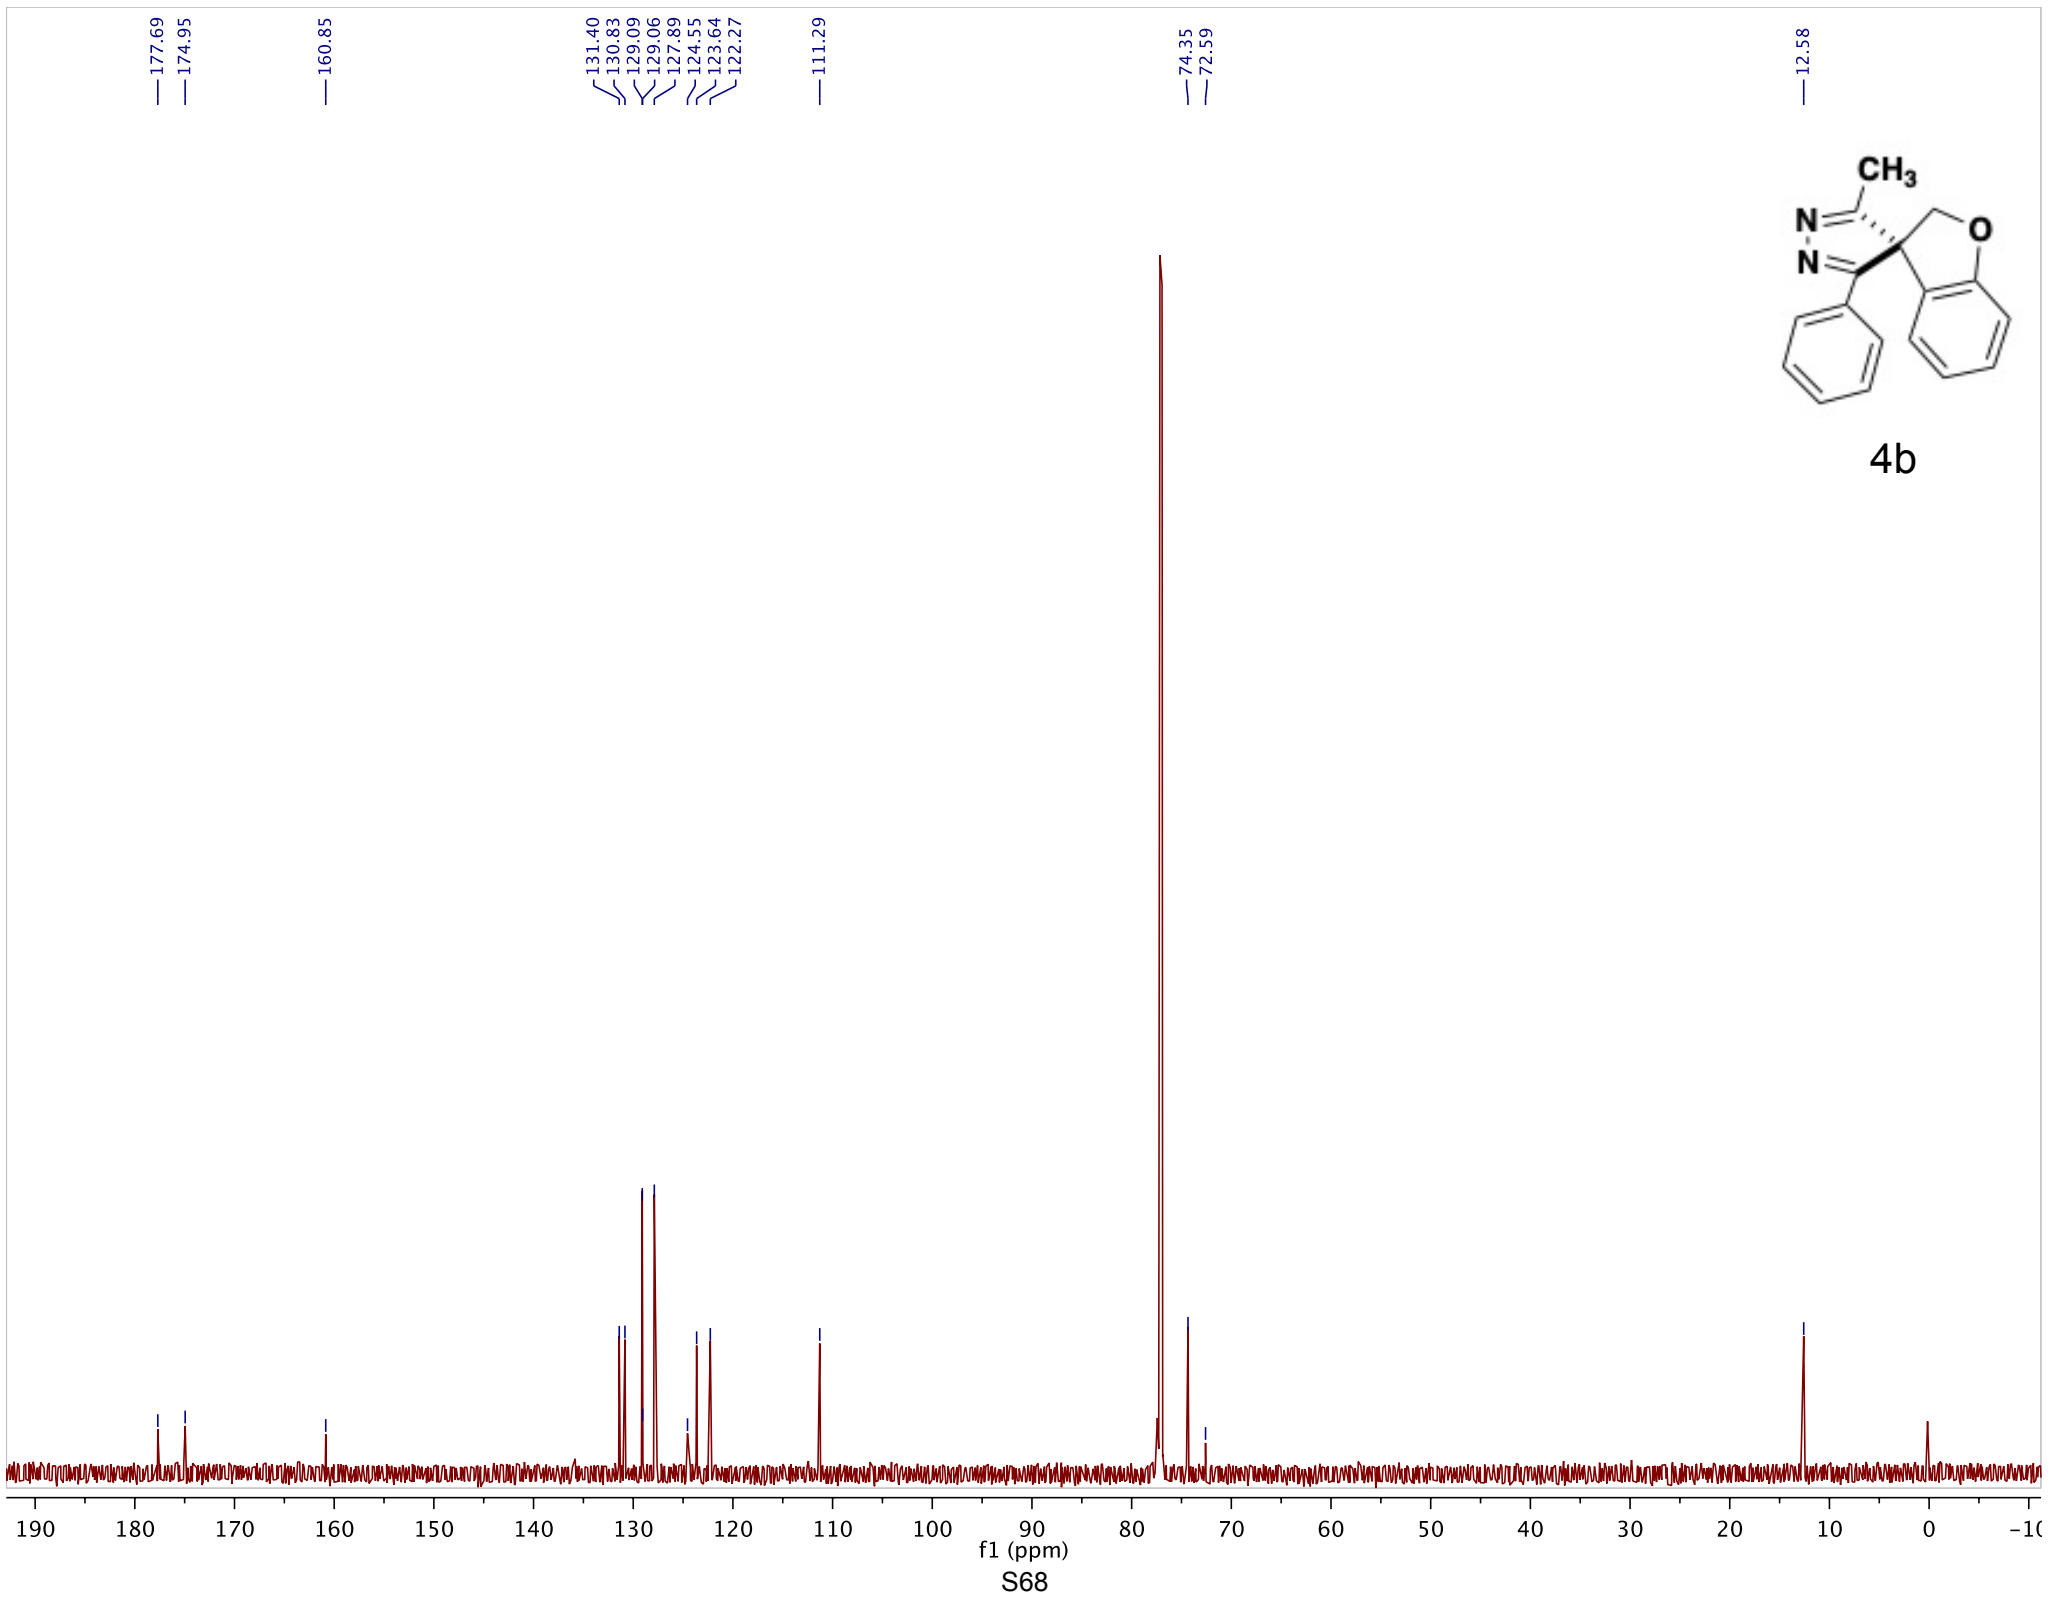

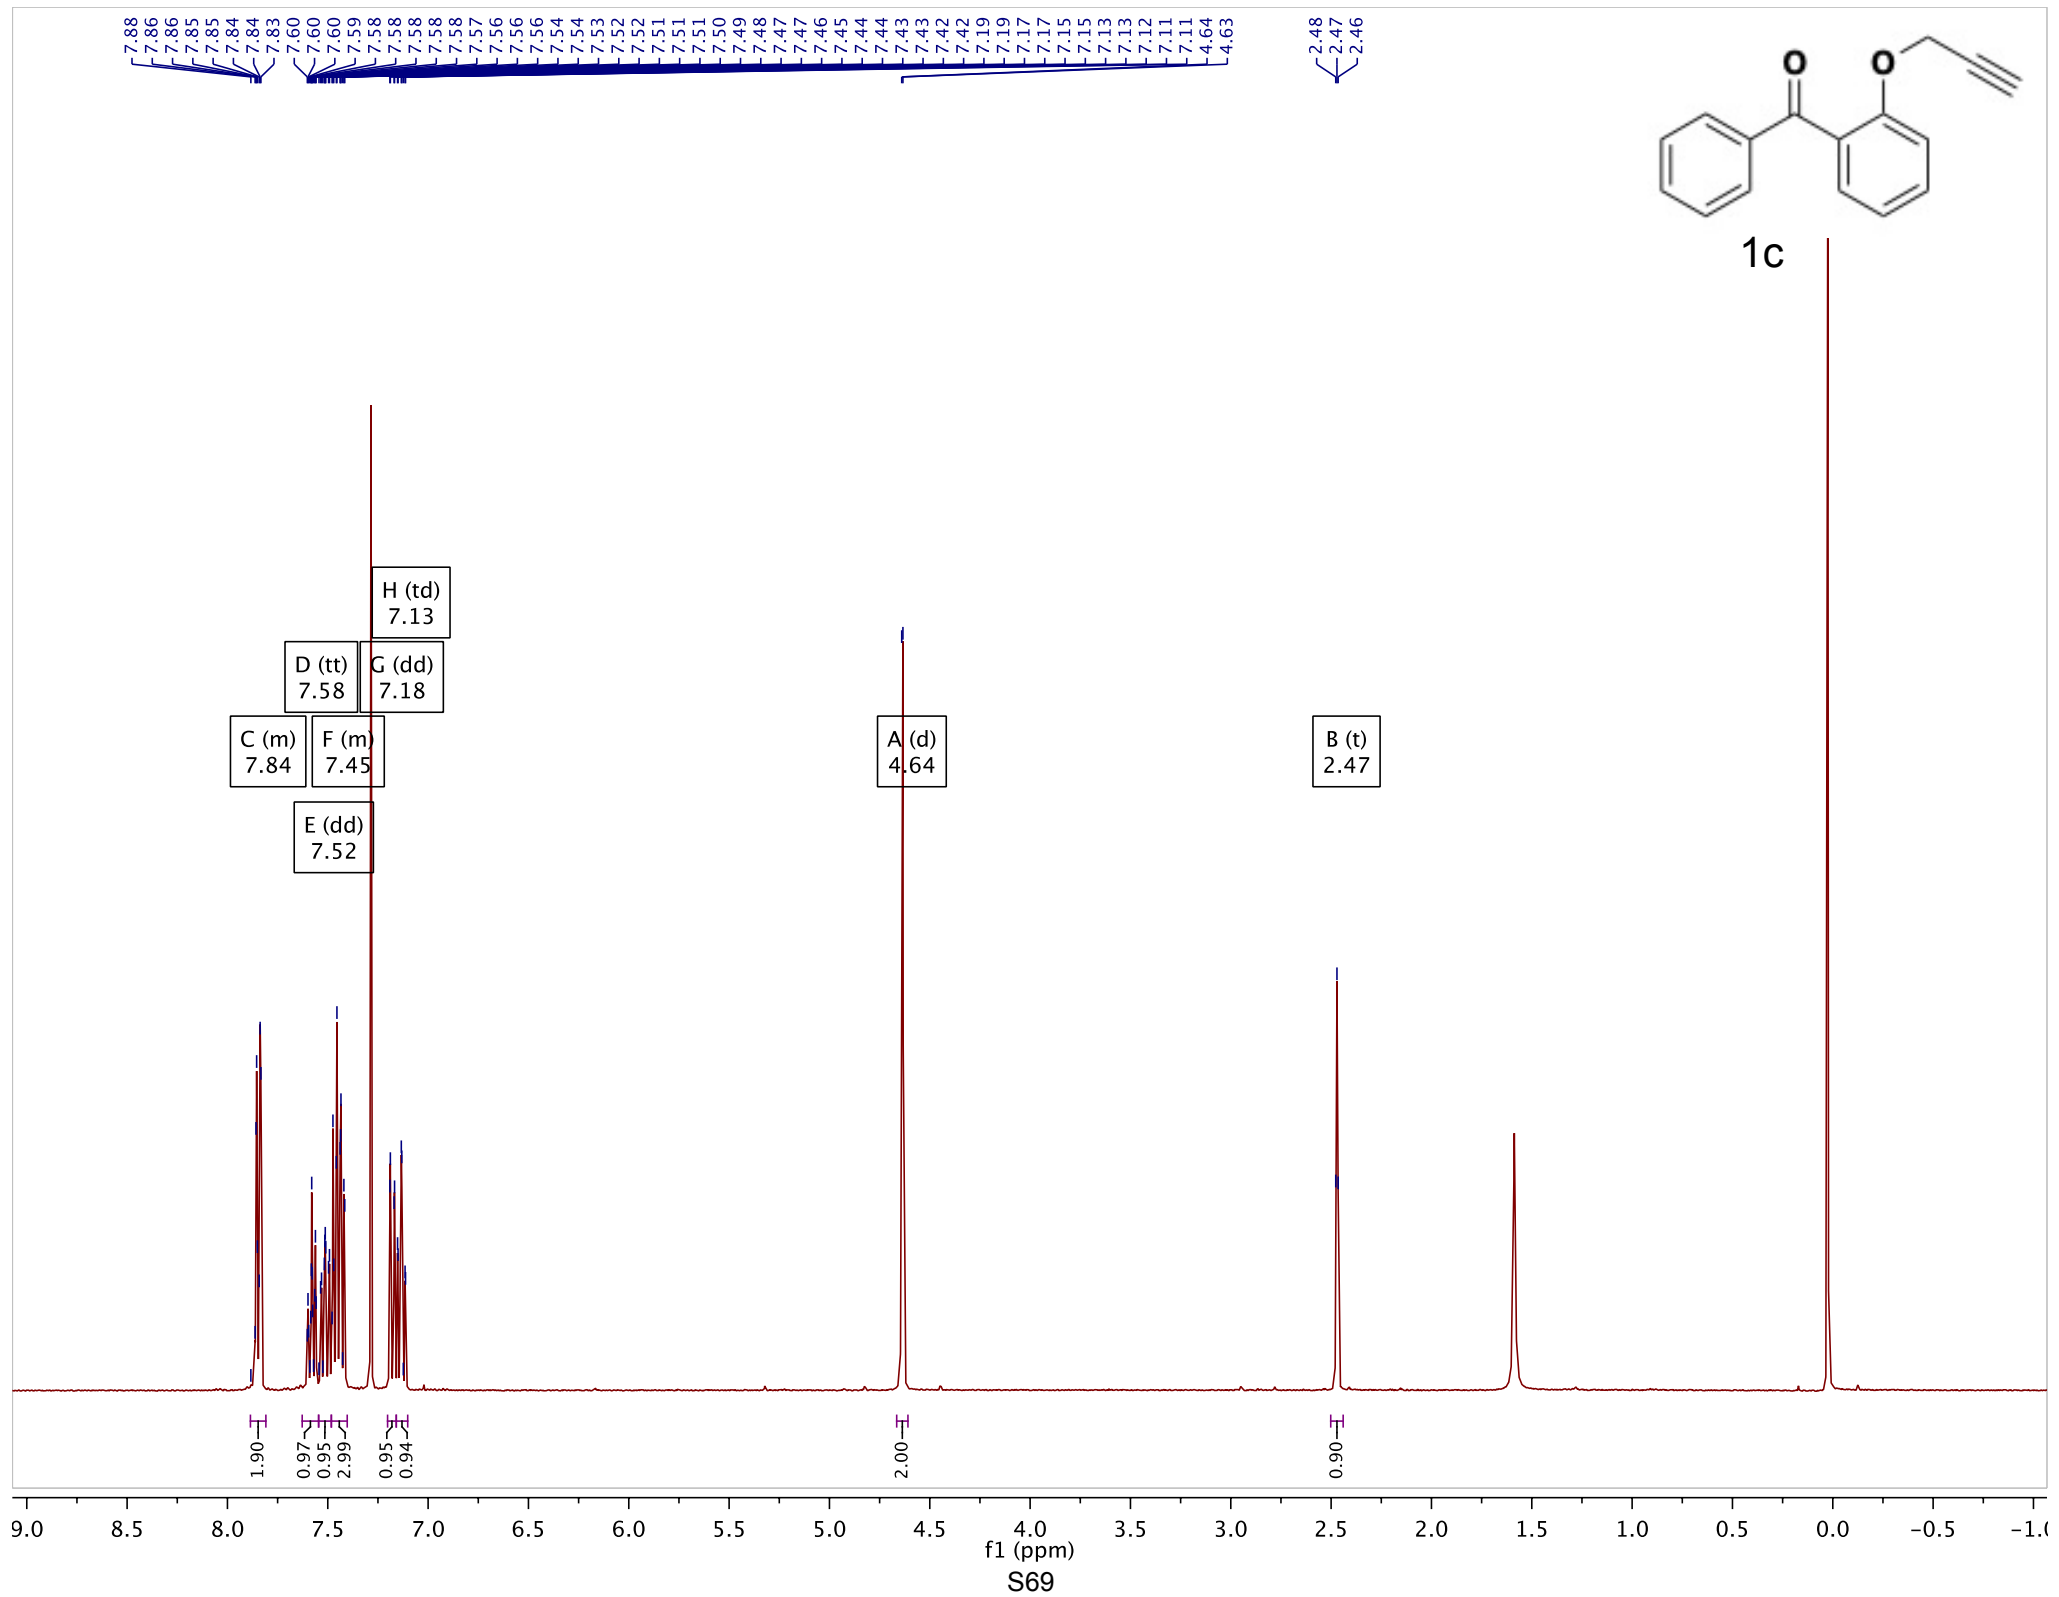

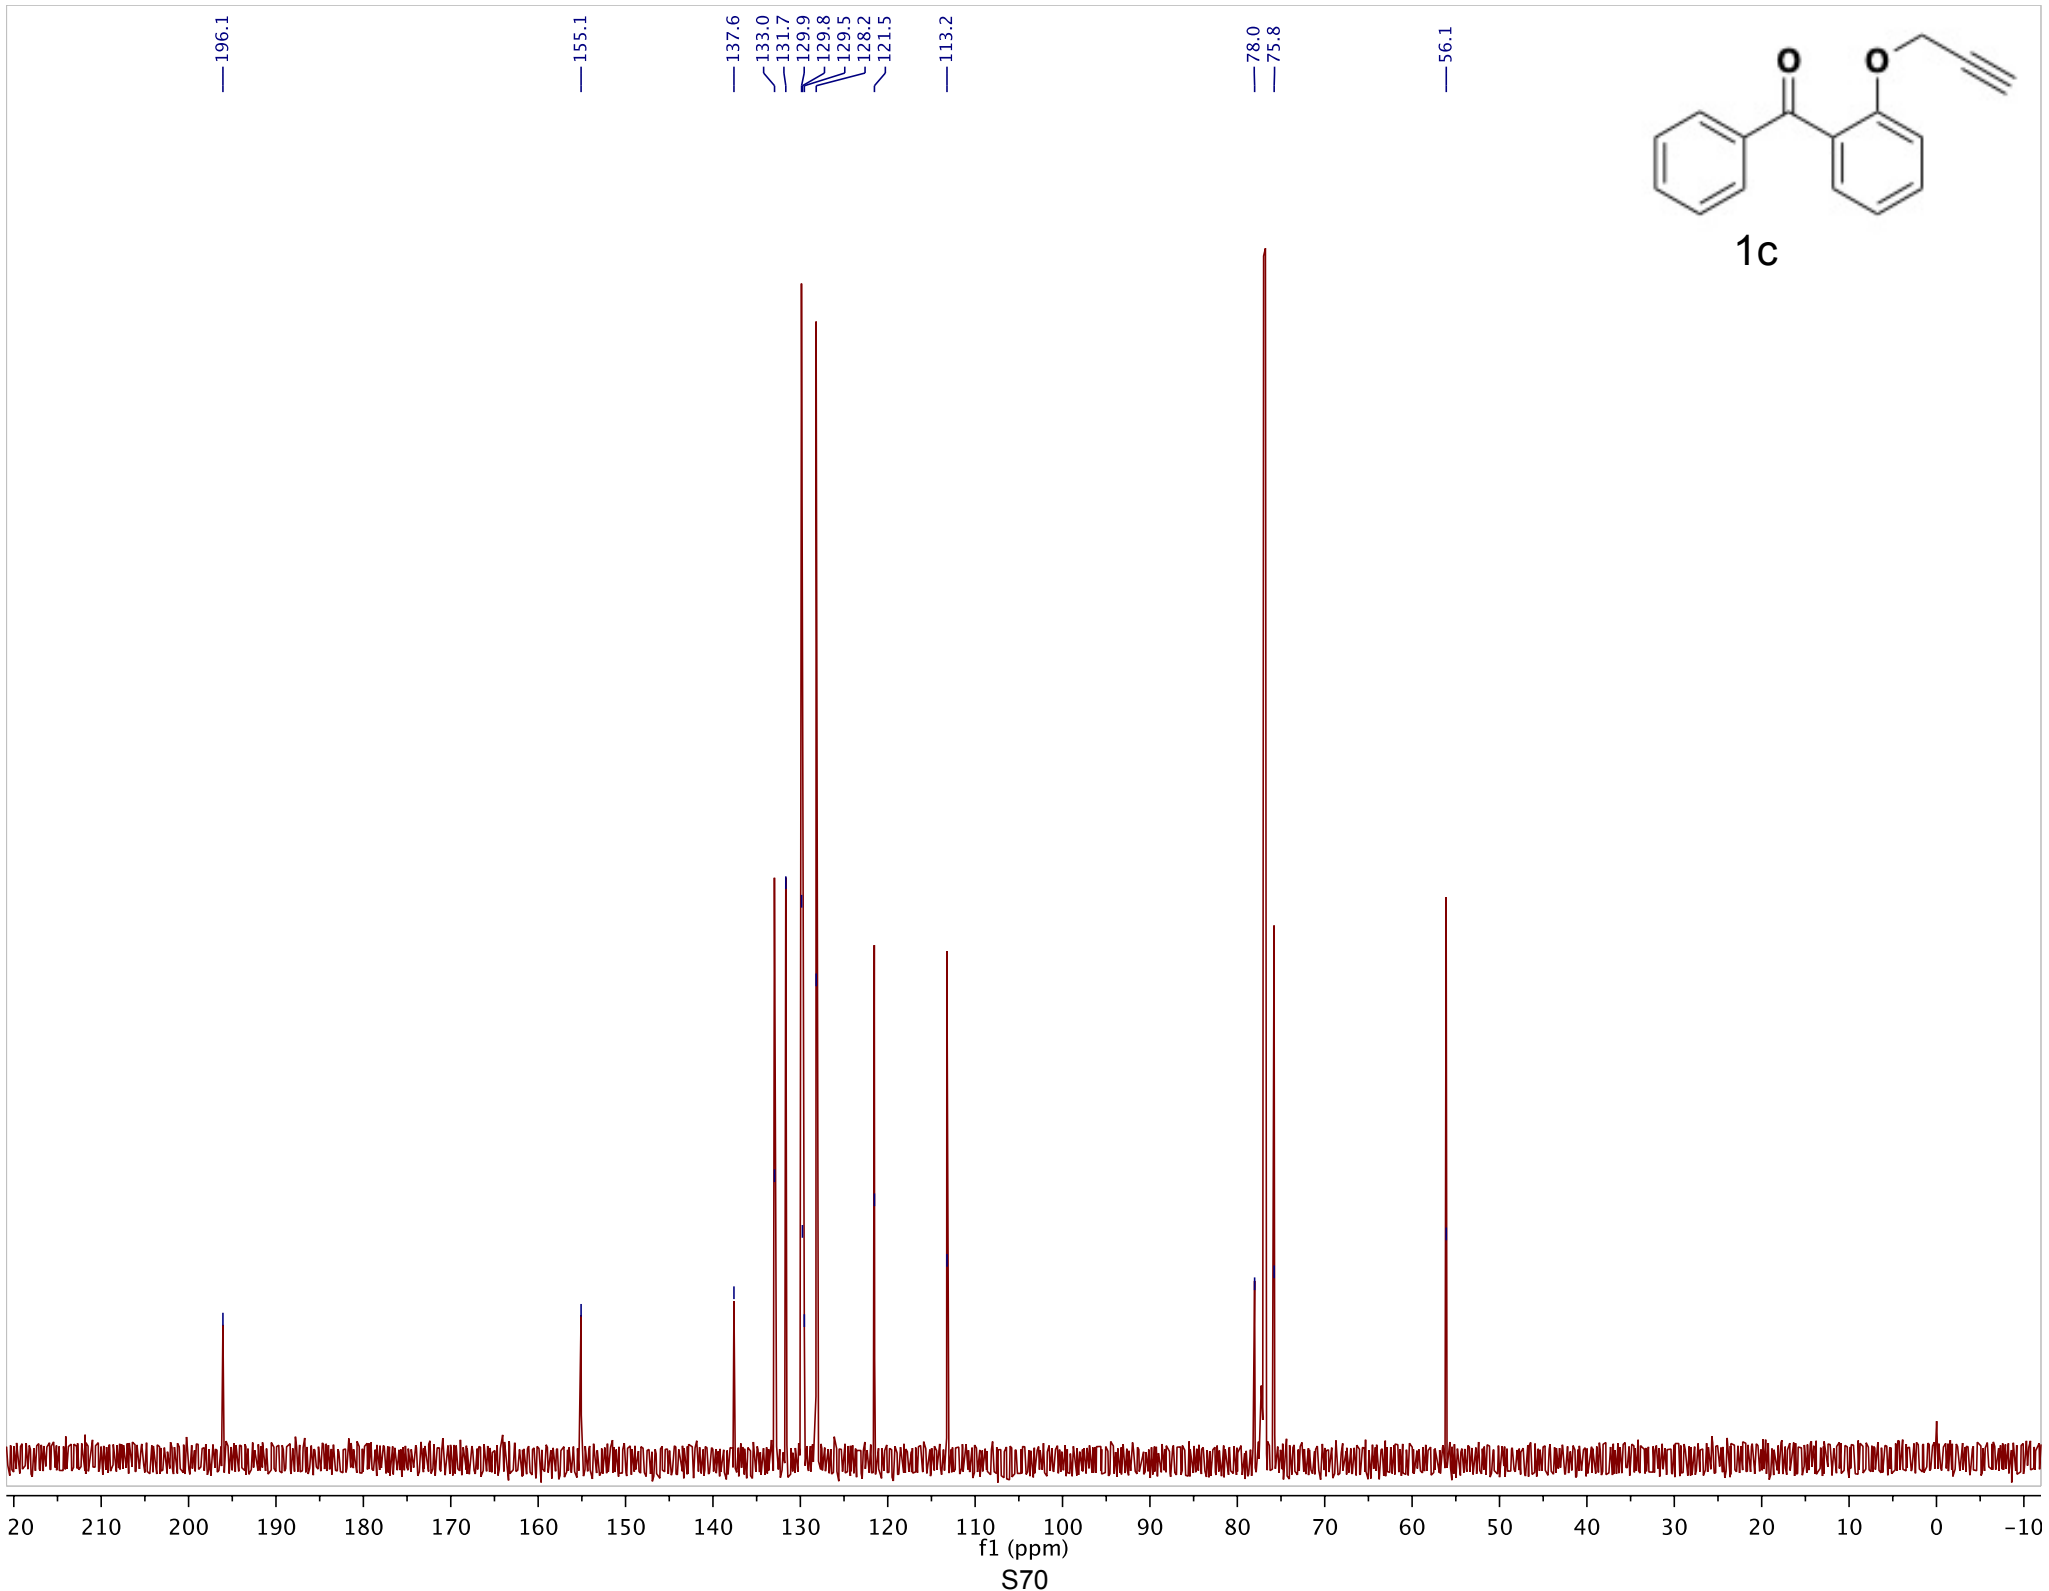

7.49  
7.49  
7.47  
7.47  
7.46  
7.45  
7.44  
7.43  
7.28  
7.26  
7.26  
7.25  
7.24  
7.23  
7.21  
7.16  
7.15

5.43

4.67  
4.66

2.44  
2.44  
2.43

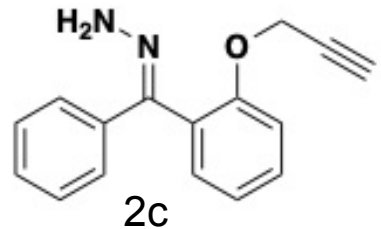

E (d)  
7.15  
C (dd)  
7.26  
B (m)  
7.47  
D (d)  
7.22

G (s)  
5.43

A (d)  
4.67

F (t)  
2.44

2.78  
3.26  
1.10  
1.96

2.32

2.13

1.00

9.0 8.5 8.0 7.5 7.0 6.5 6.0 5.5 5.0 4.5 4.0 3.5 3.0 2.5 2.0 1.5 1.0 0.5 0.0 -0.5

f1 (ppm)

S71

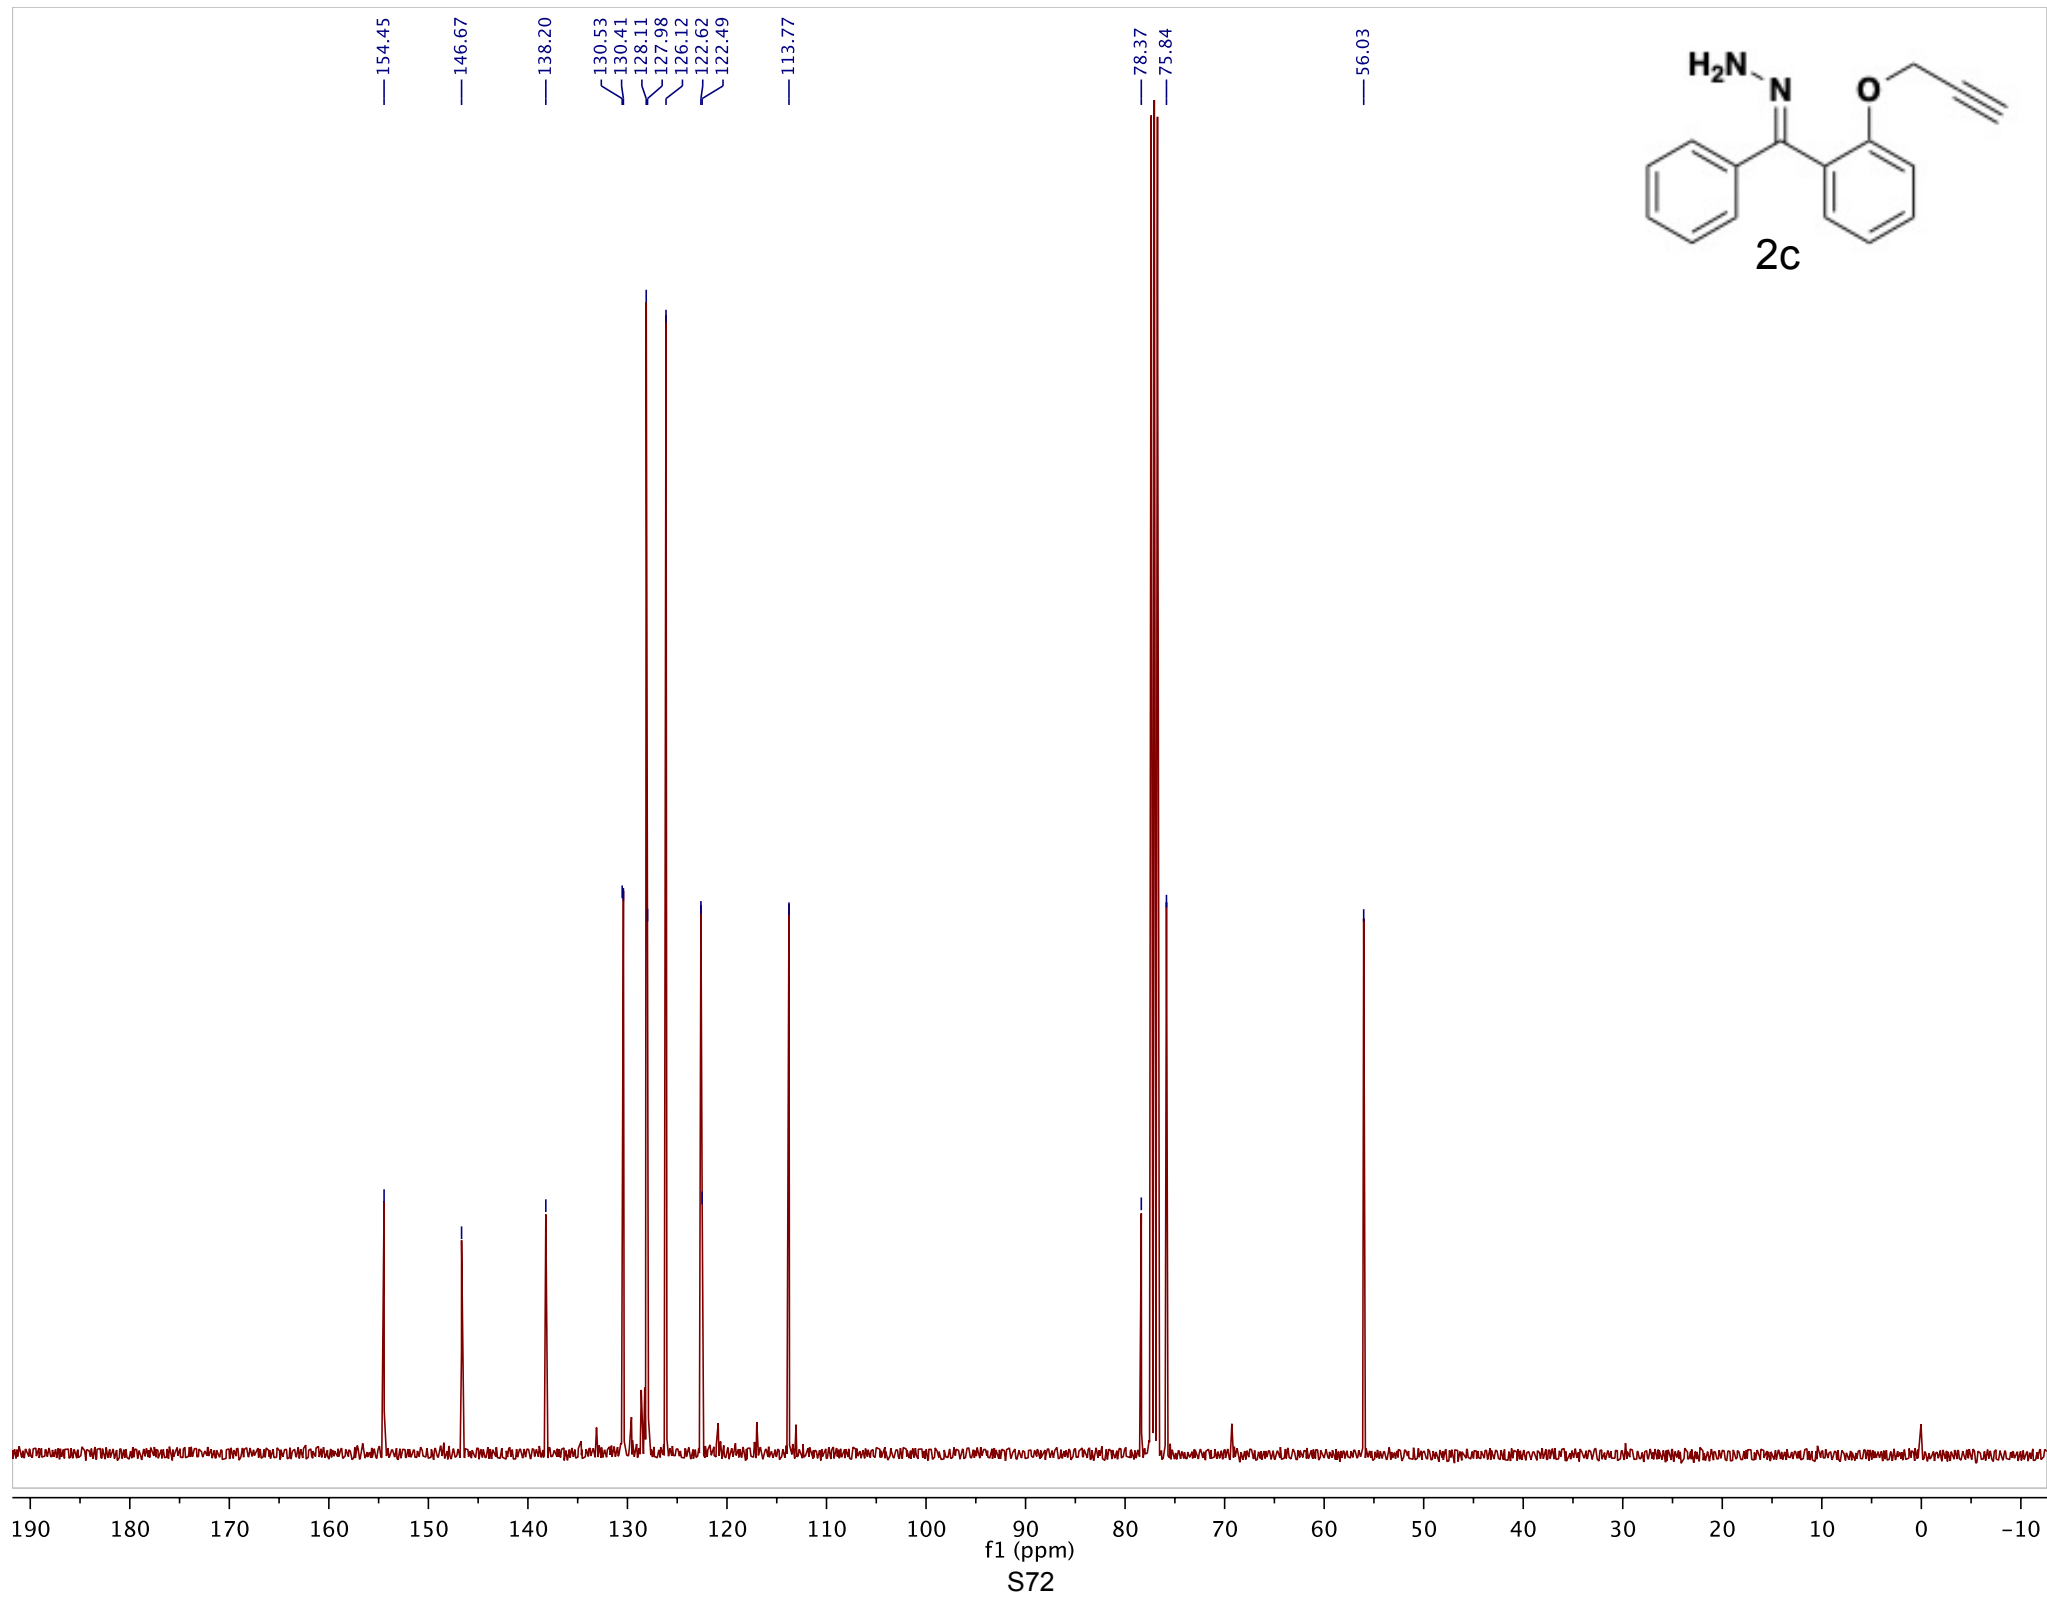



7.90  
7.88  
7.88  
7.64  
7.64  
7.28  
7.28  
7.27  
7.27  
7.26  
7.26  
7.25  
7.08  
7.08  
7.06  
7.06  
7.04  
7.04  
6.99  
6.99  
6.97  
6.96  
6.85  
6.84  
6.84  
6.83  
6.83  
6.82  
5.17  
5.13  
4.90  
4.90  
4.87  
4.87

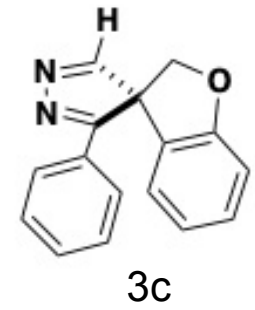

B (d)  
7.64

D (td)  
7.06

A (dd)  
7.89

C (m)  
7.27

F (m)  
6.84

E (dd)  
6.98

H (d)  
5.15

I (dd)  
4.88

1.05  
0.98  
3.27  
1.15  
1.07  
2.08

1.04  
1.09

9.0 8.5 8.0 7.5 7.0 6.5 6.0 5.5 5.0 4.5 4.0 3.5 3.0 2.5 2.0 1.5 1.0 0.5 0.0 -0.5 -1.0

f1 (ppm)  
S73

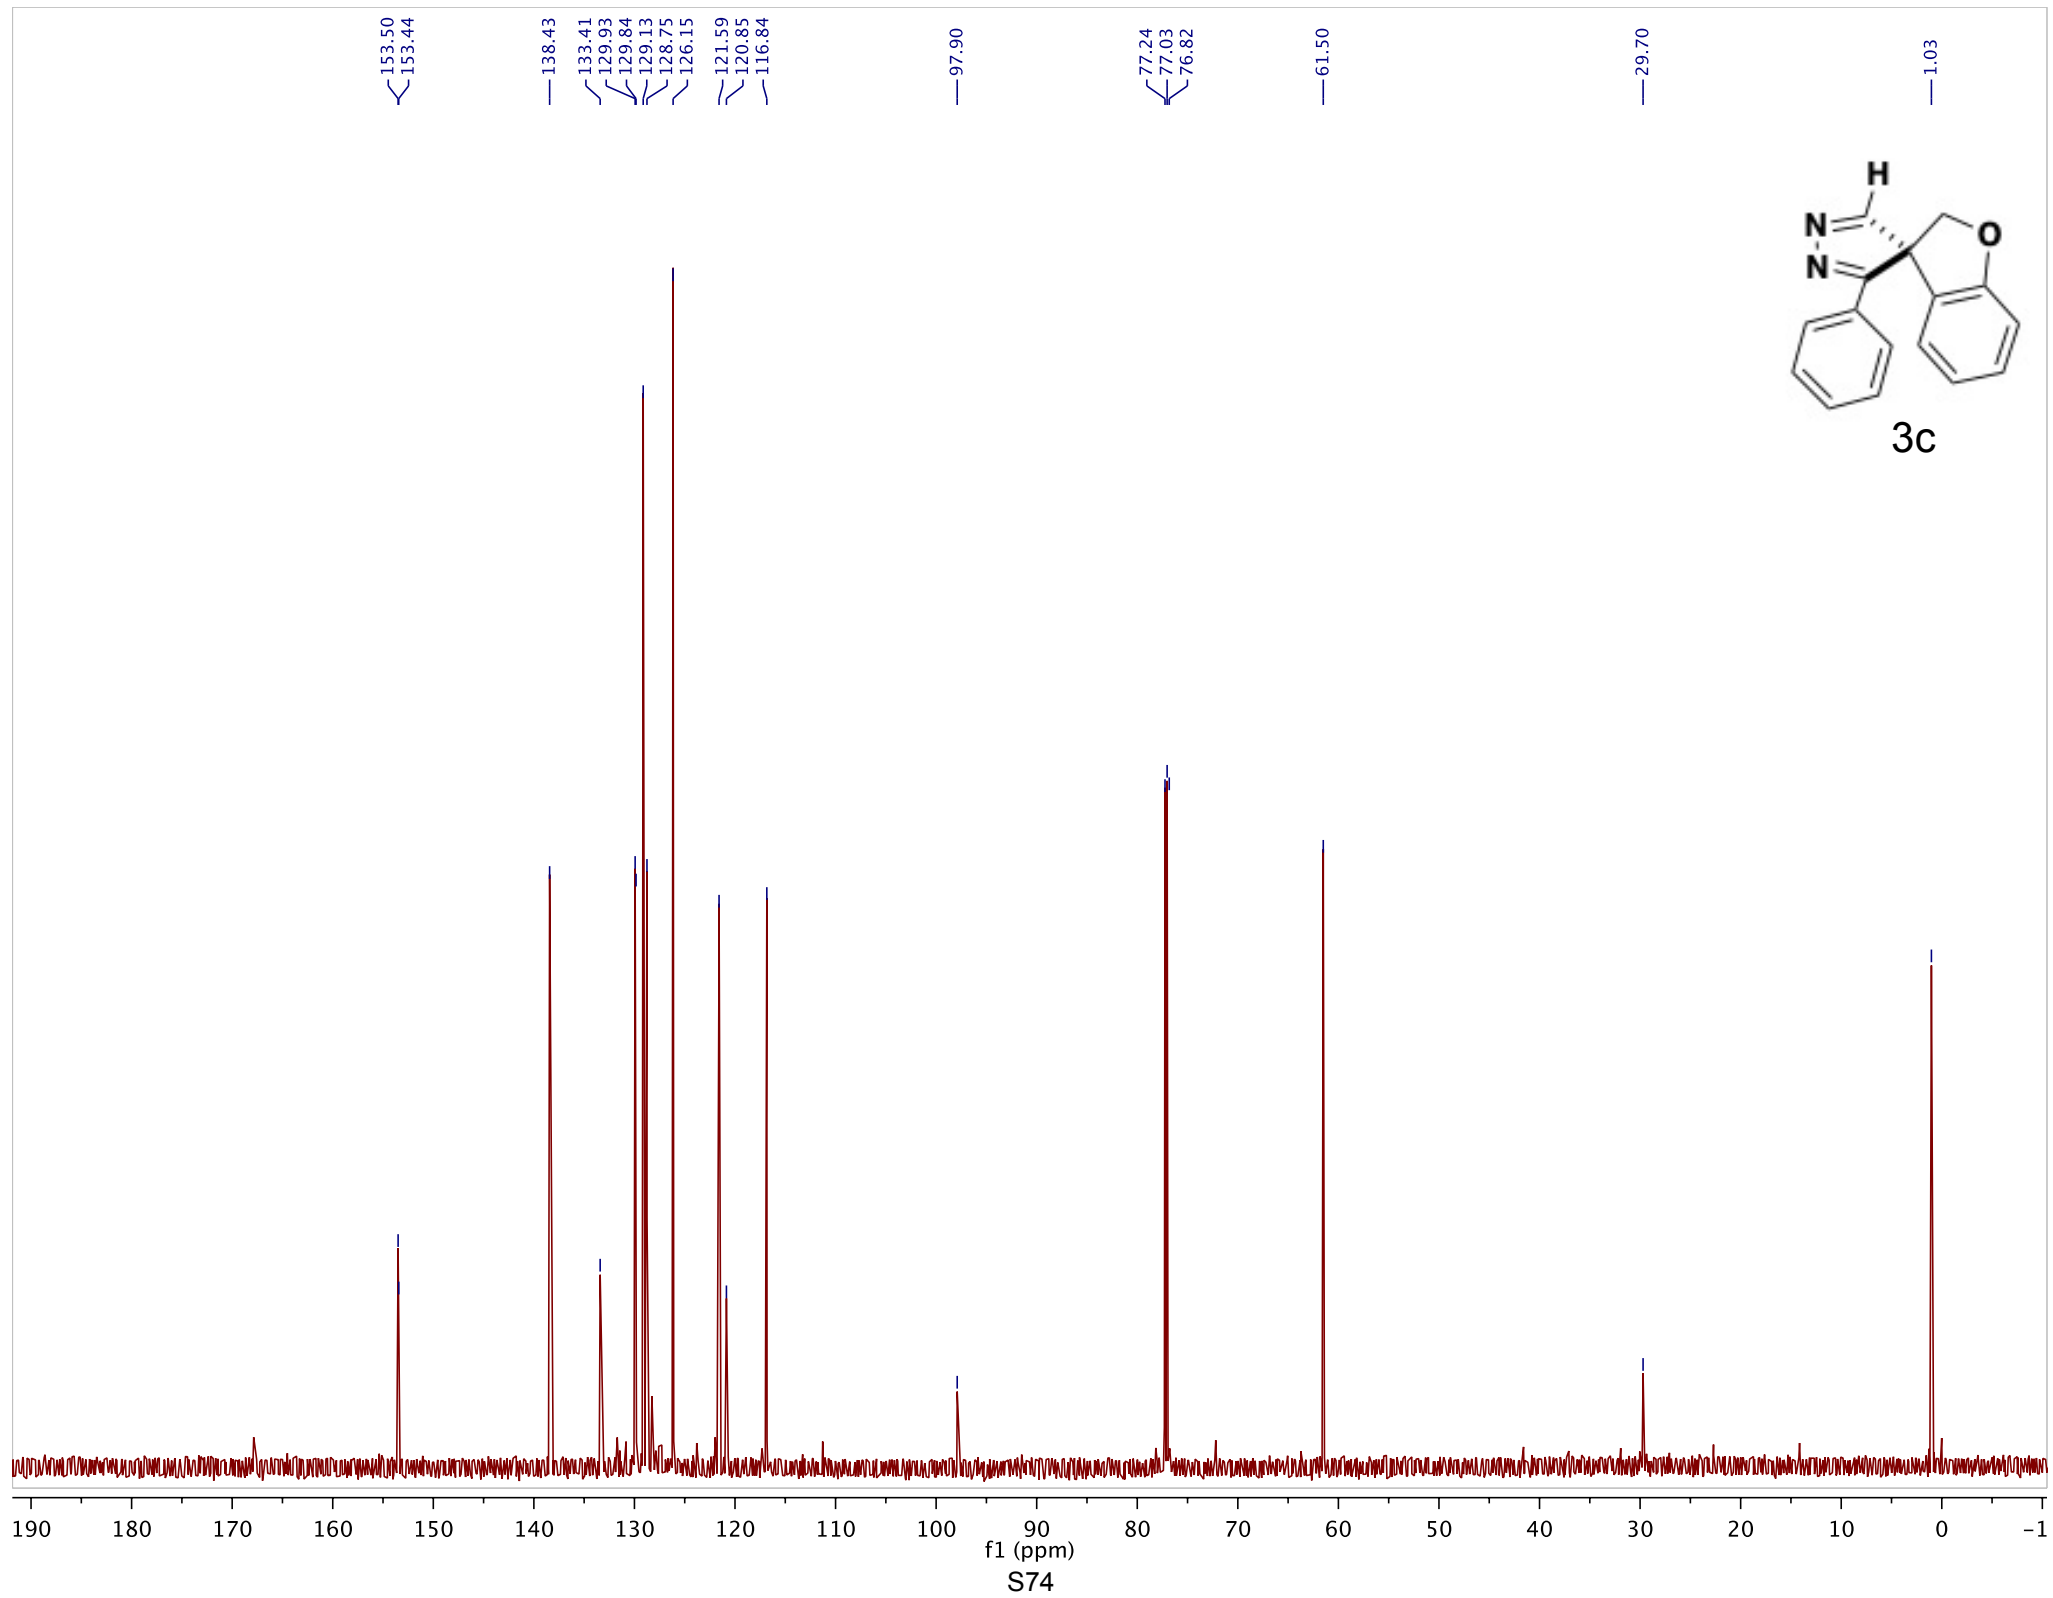

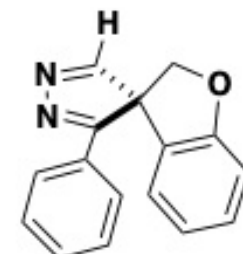

4c

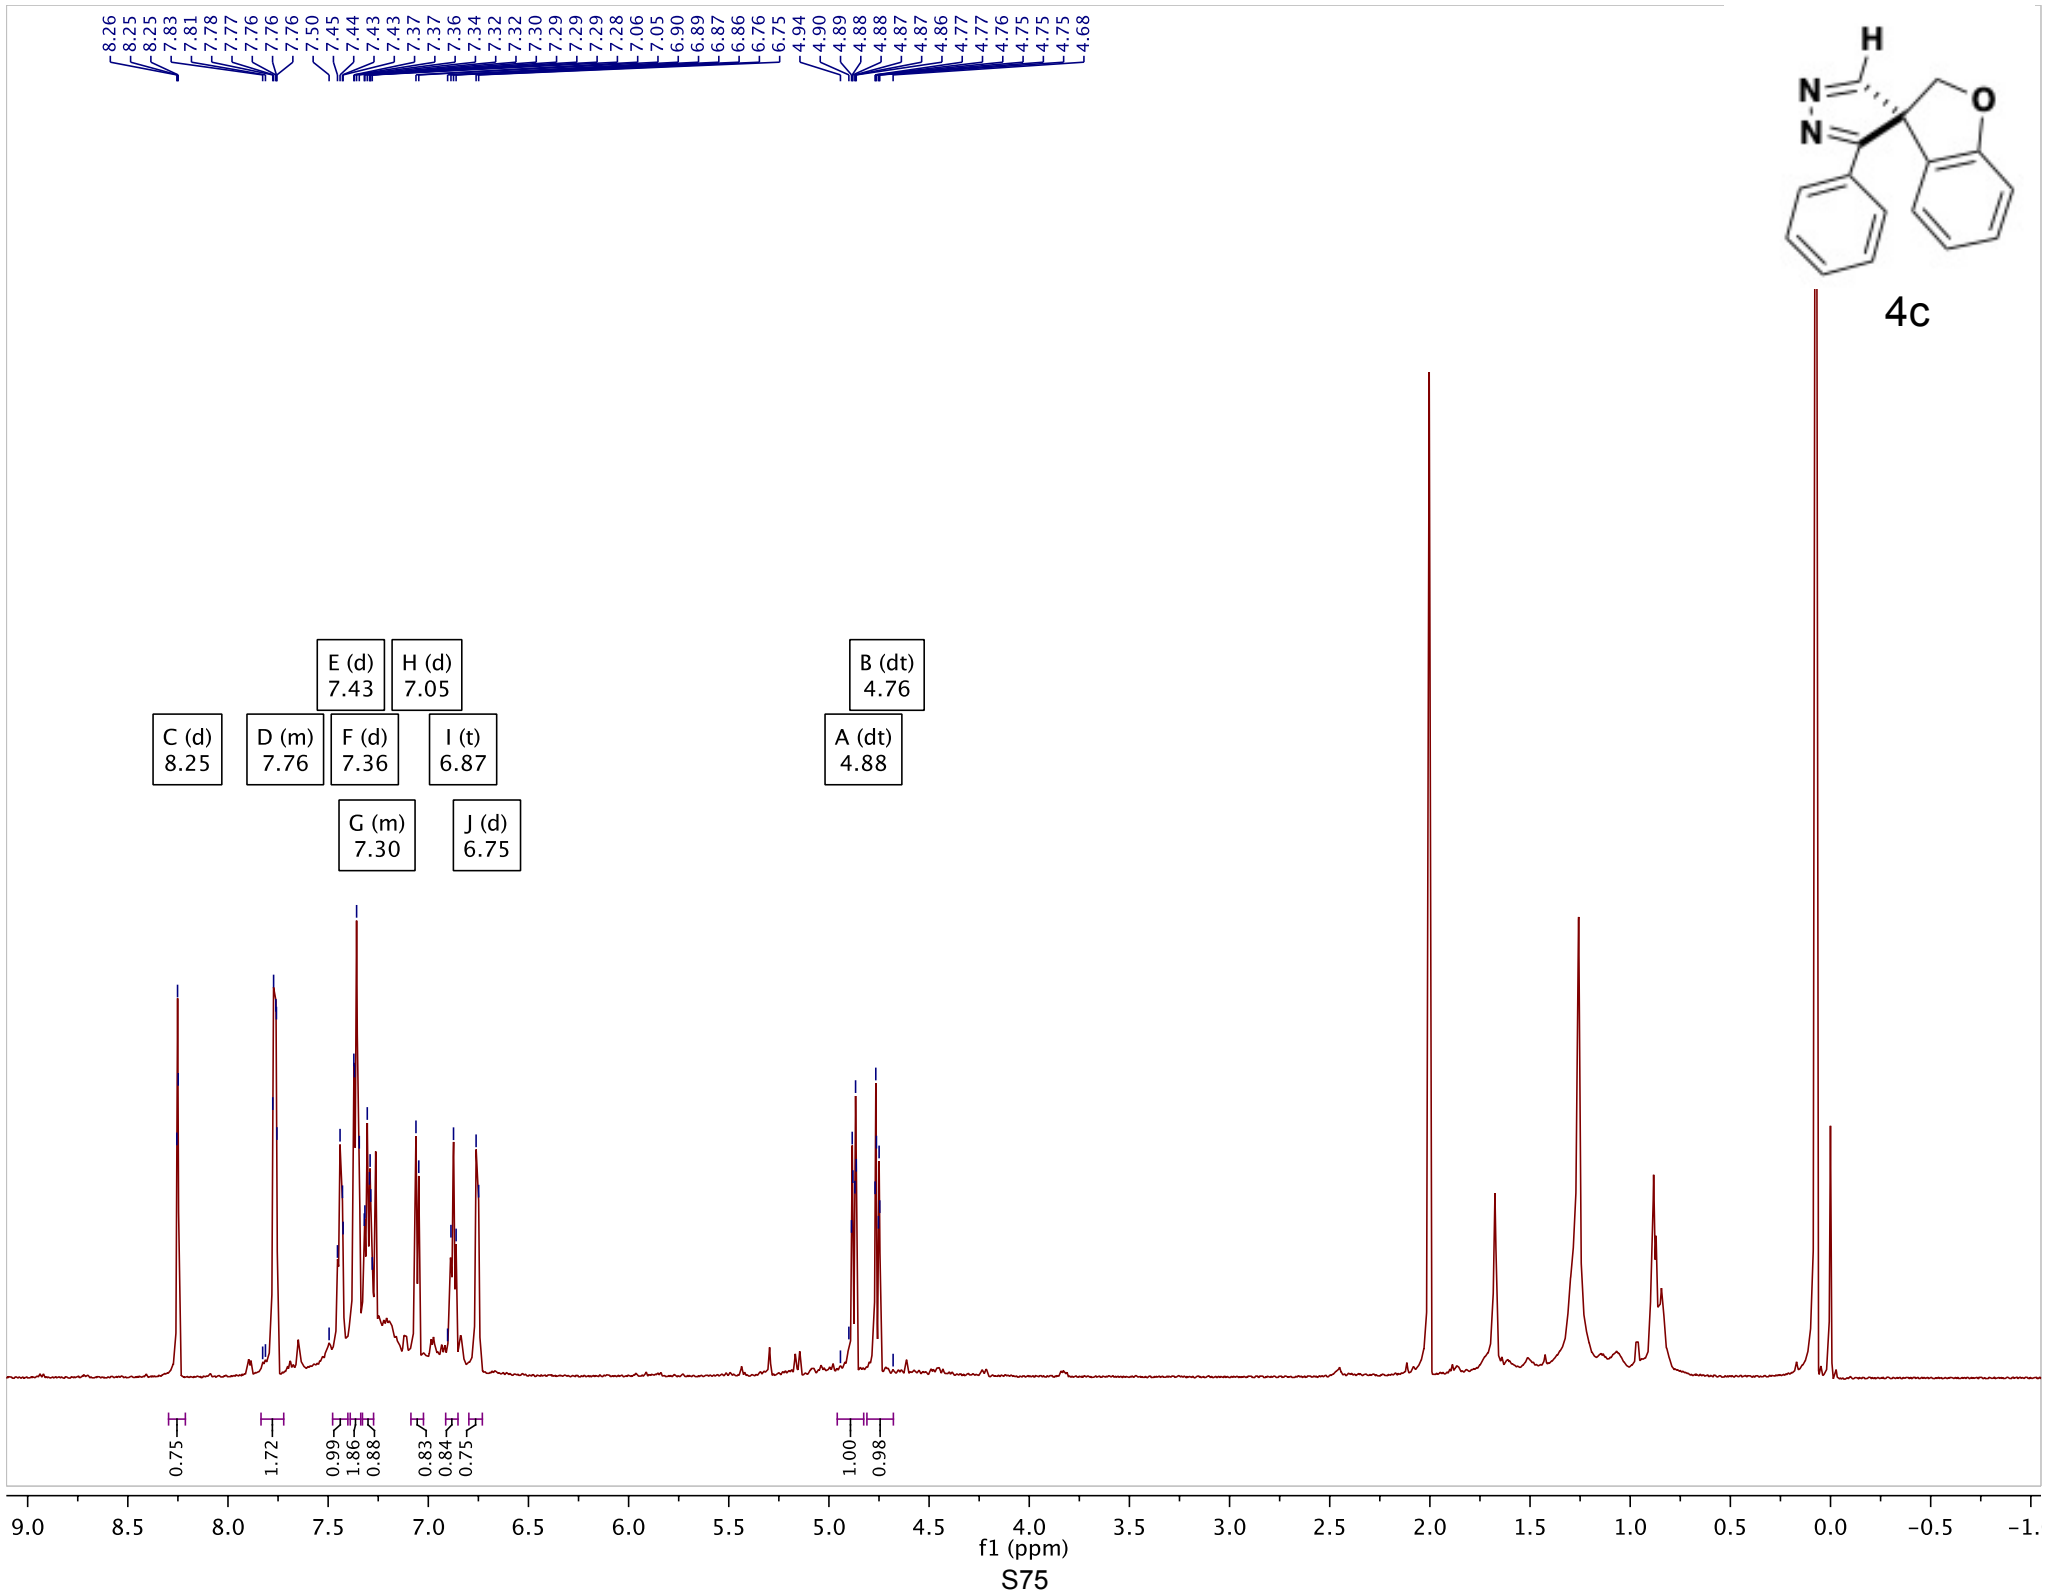

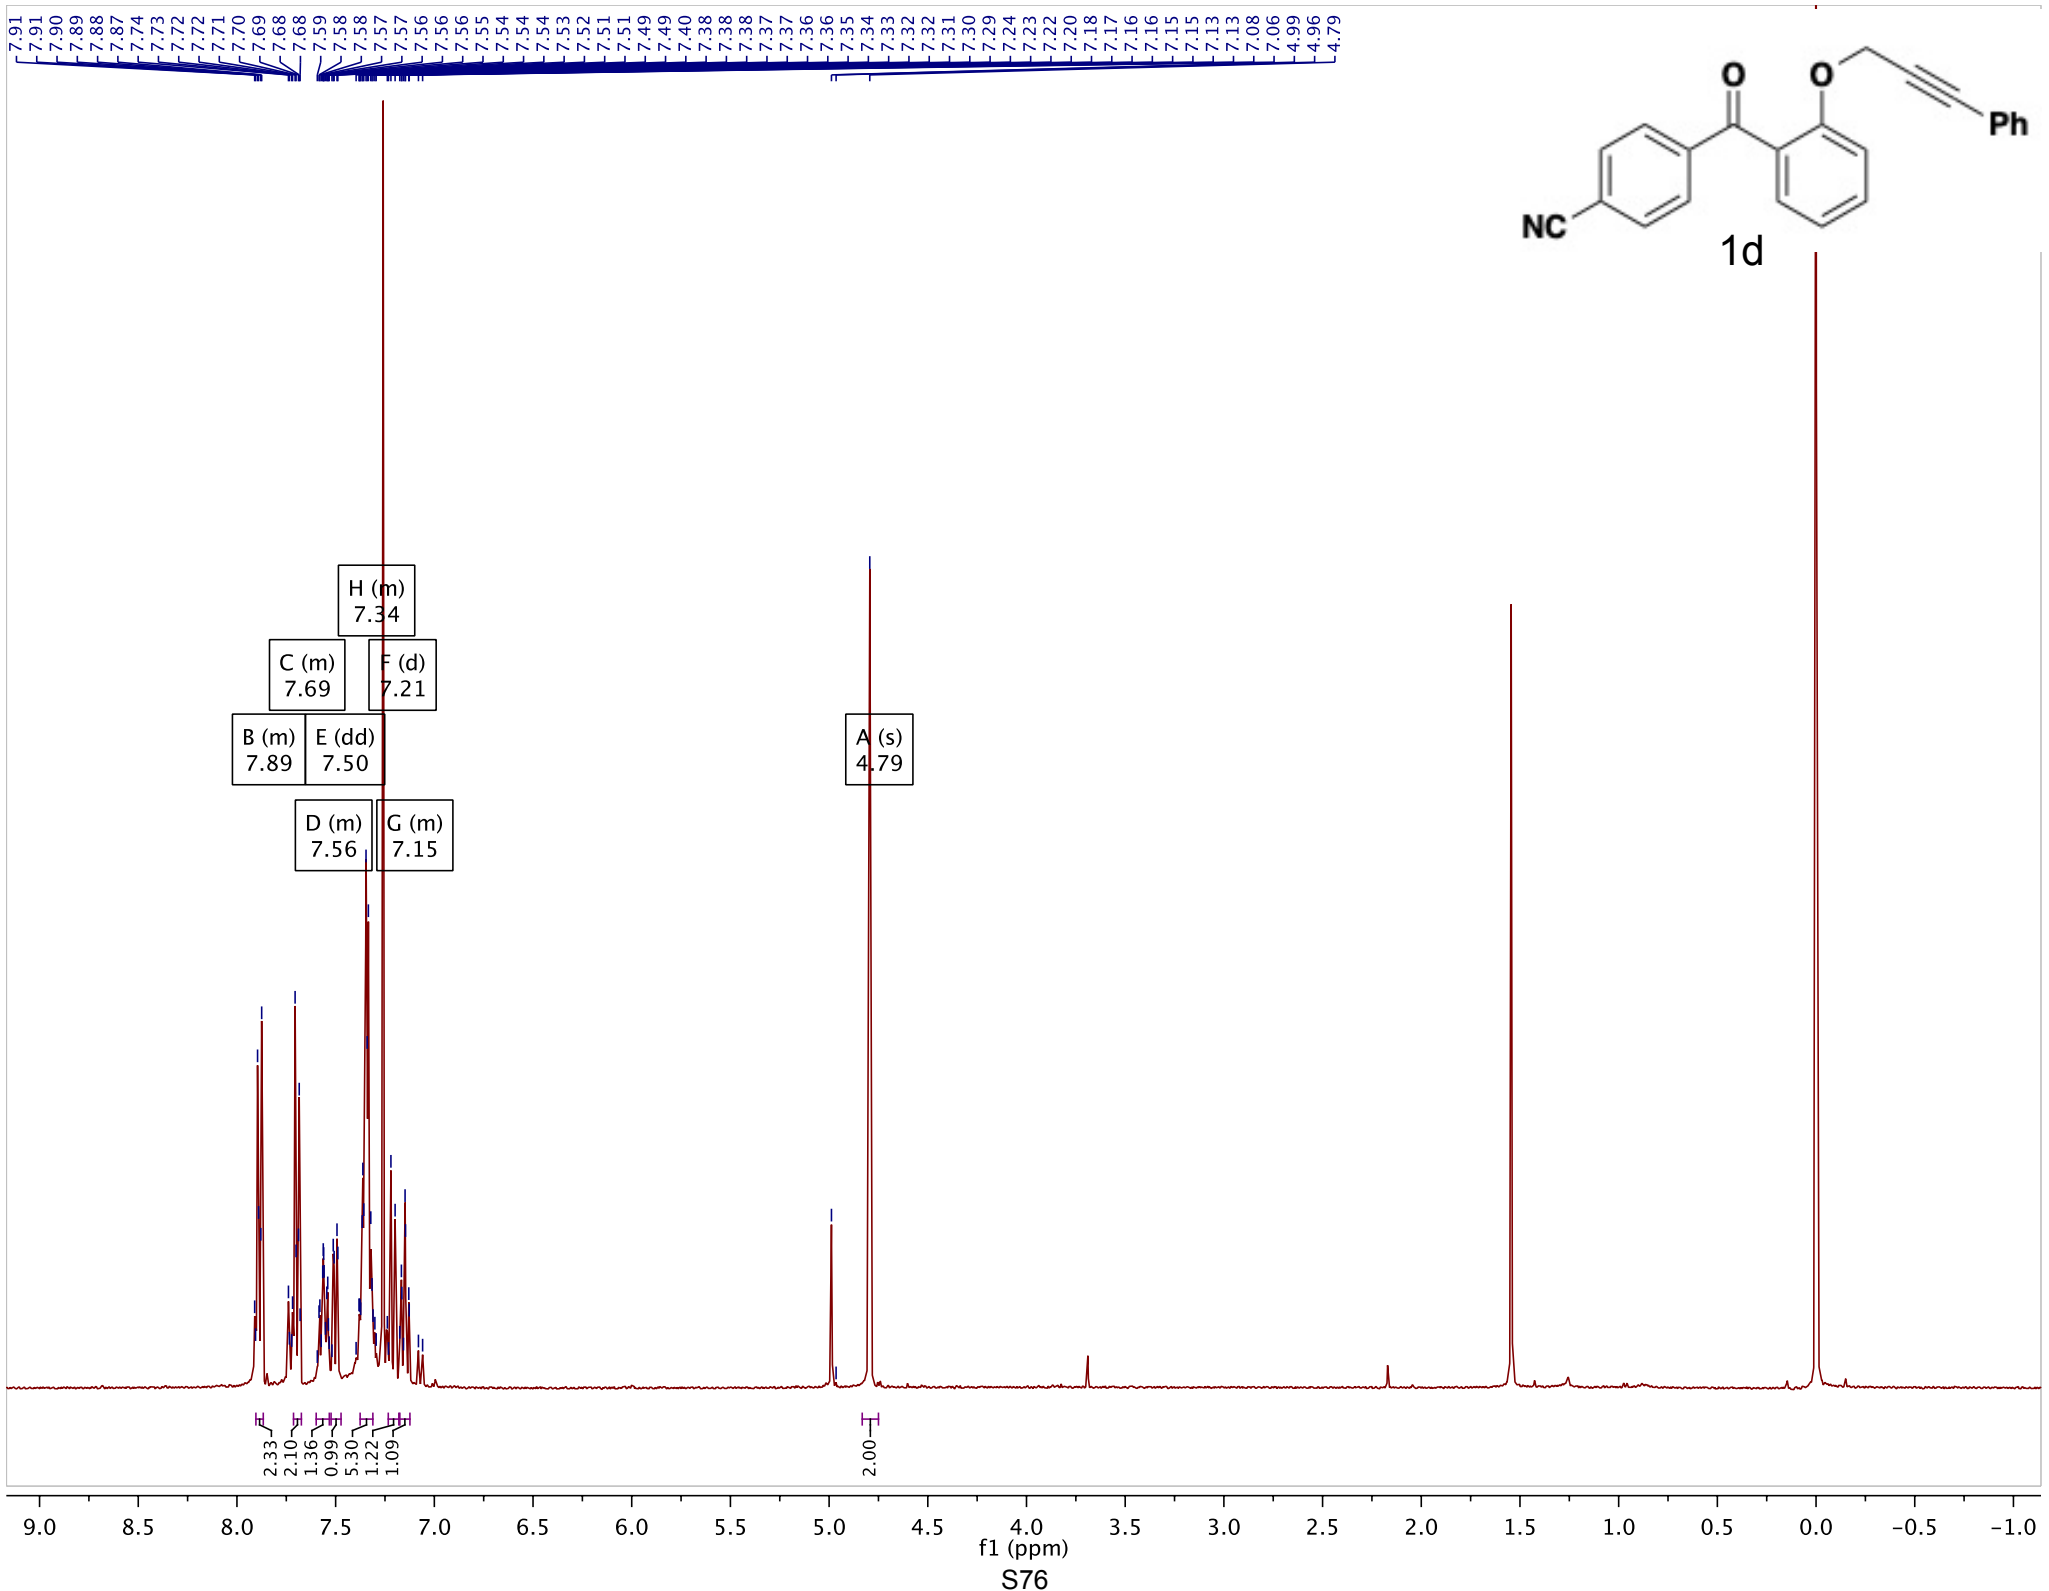

— 194.85

— 155.63

— 141.44

— 137.25

— 133.00

— 132.24

— 132.04

— 131.71

— 130.39

— 129.93

— 129.46

— 128.98

— 128.45

— 128.19

— 121.85

— 118.22

— 115.76

— 113.41

— 87.71

— 82.82

— 56.87

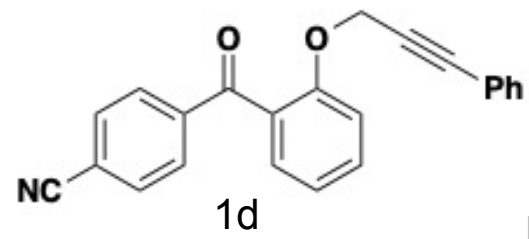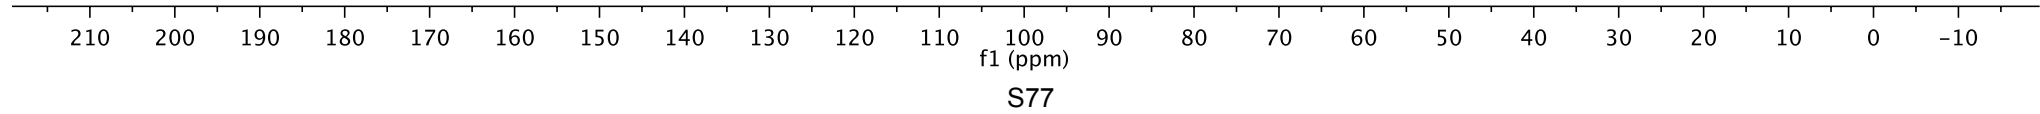

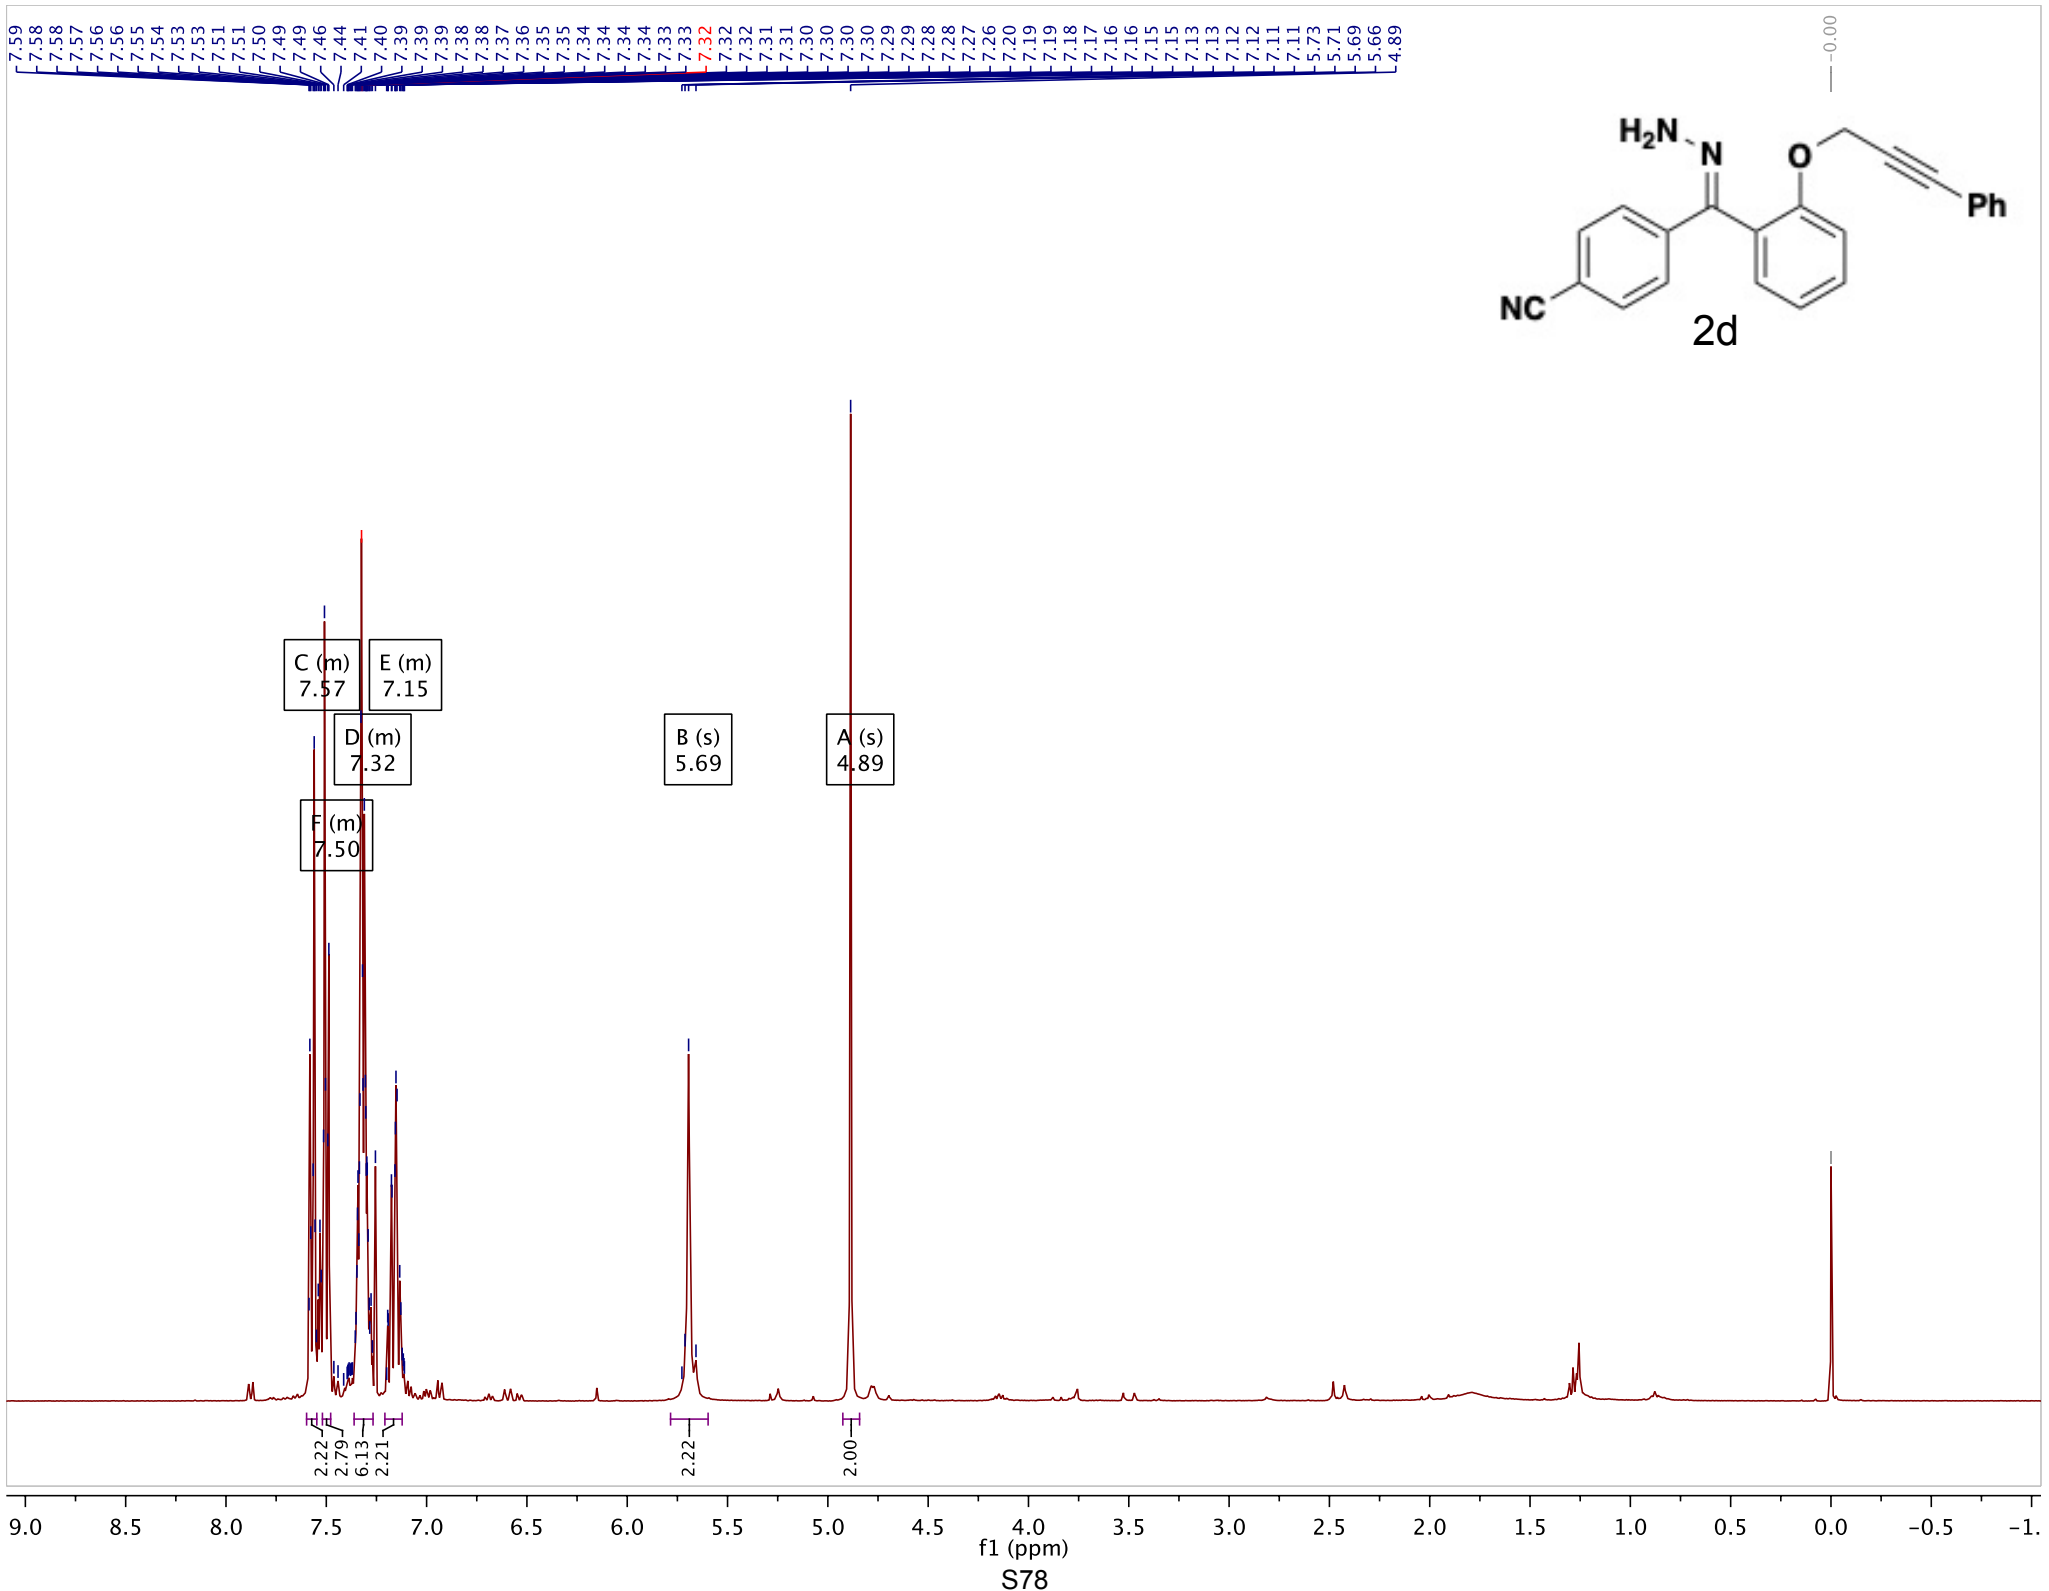

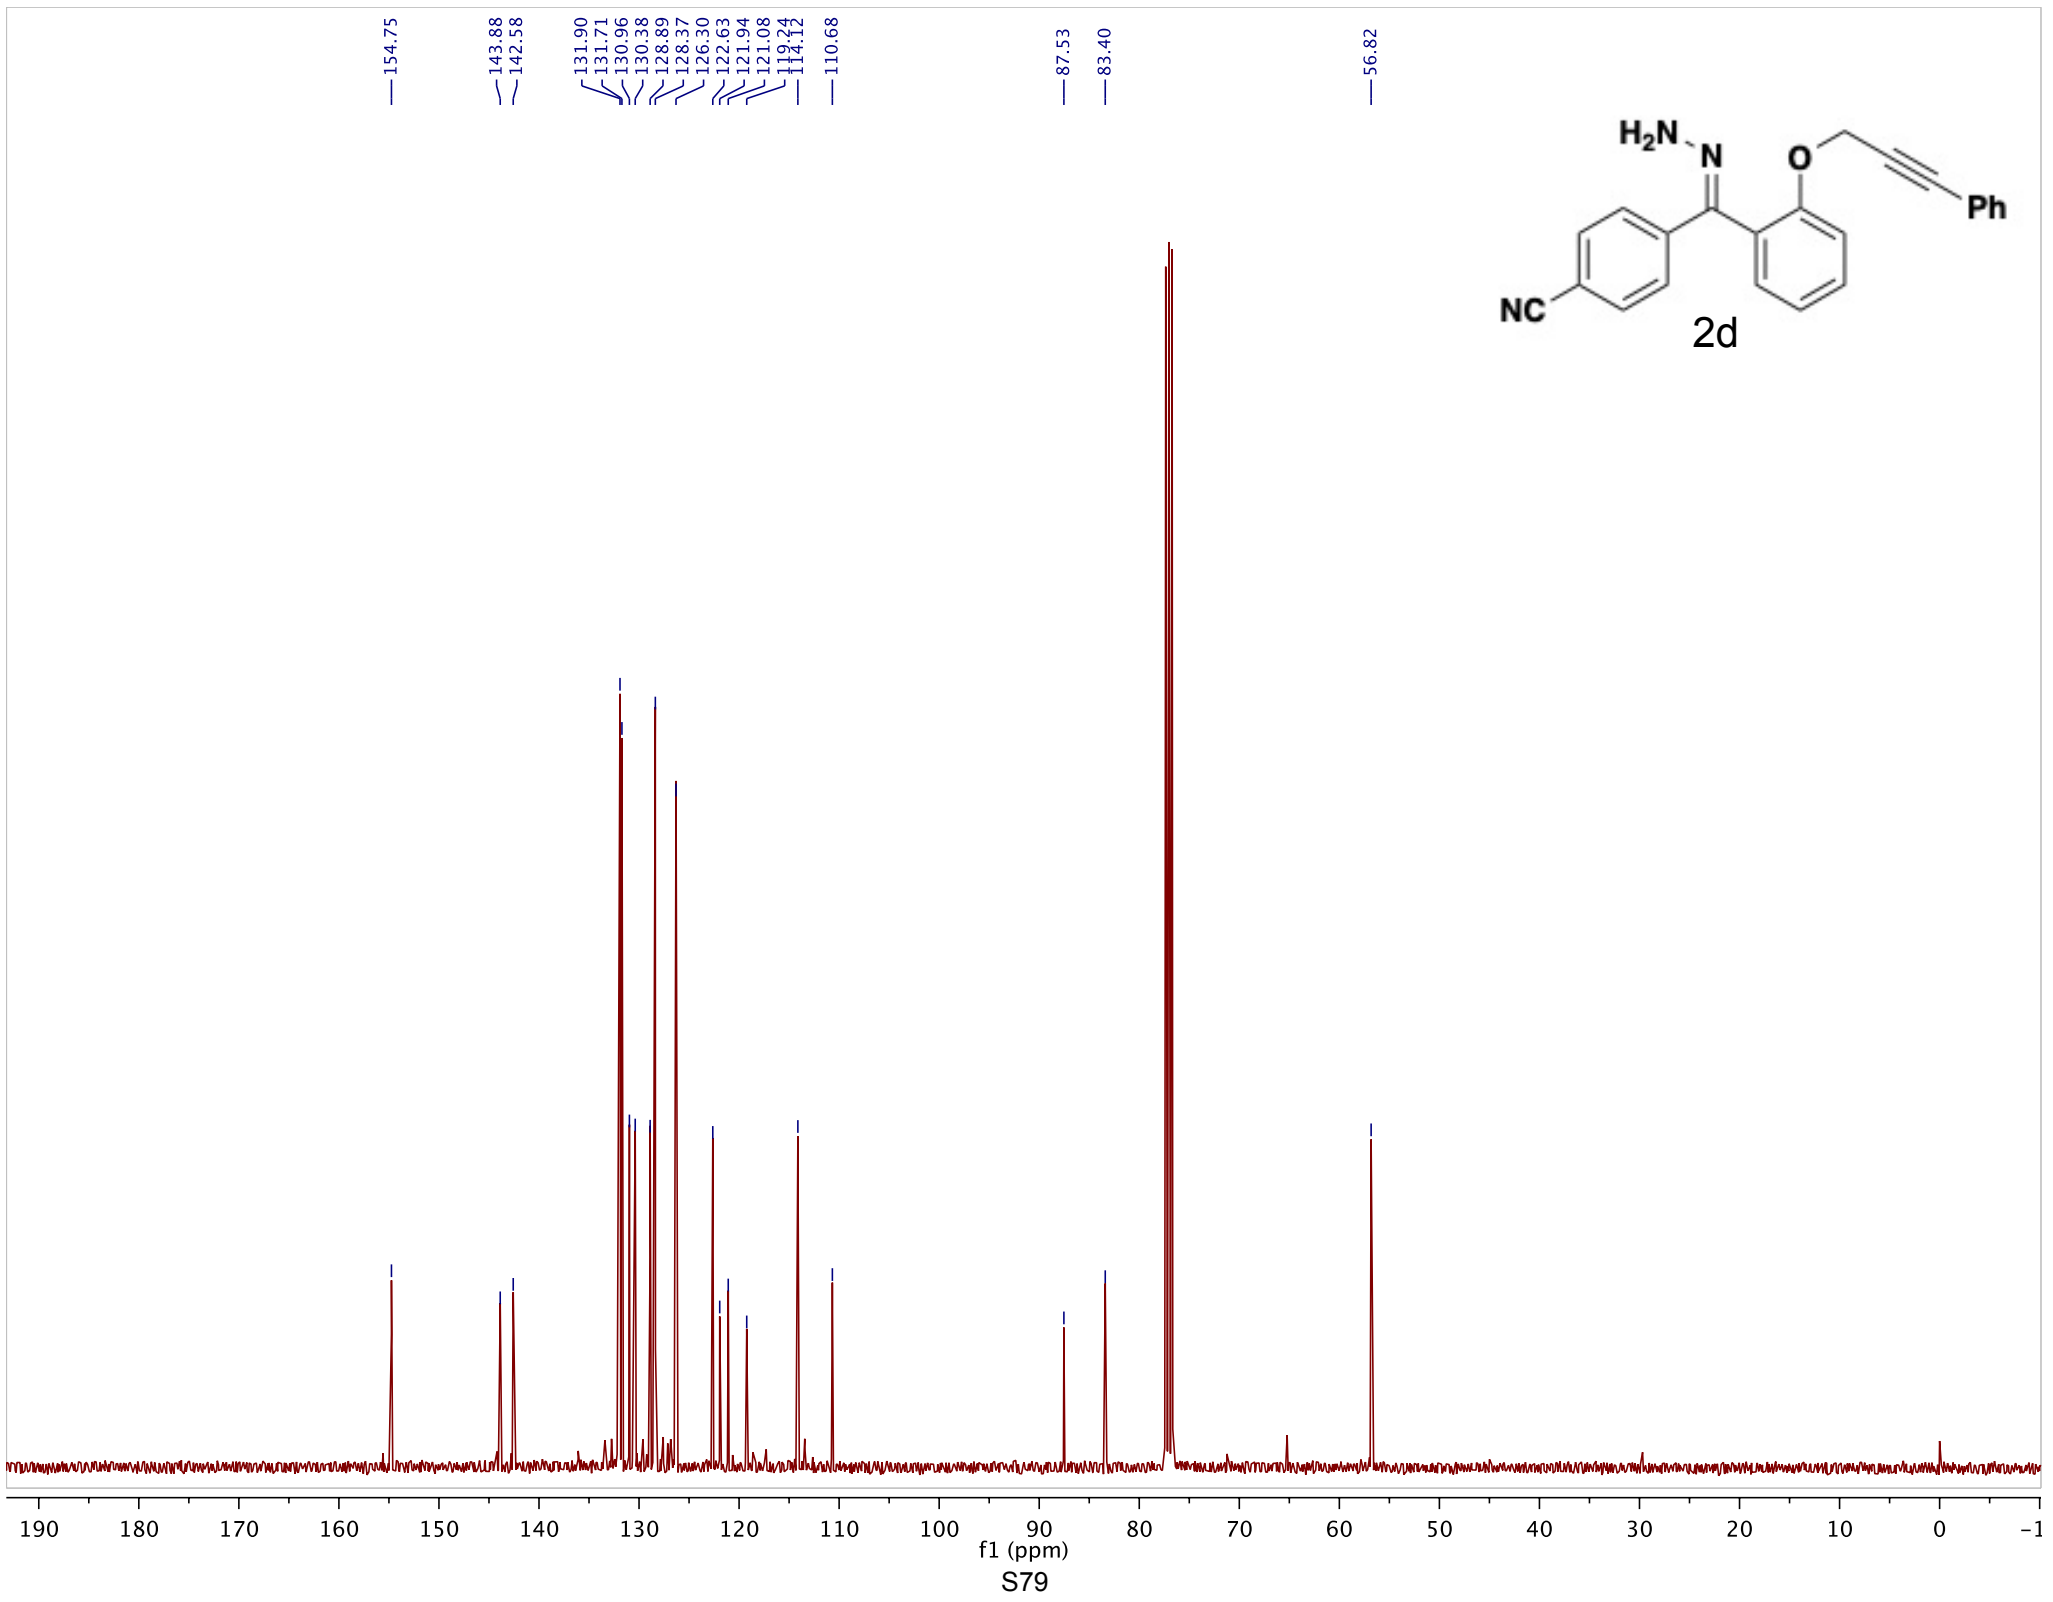

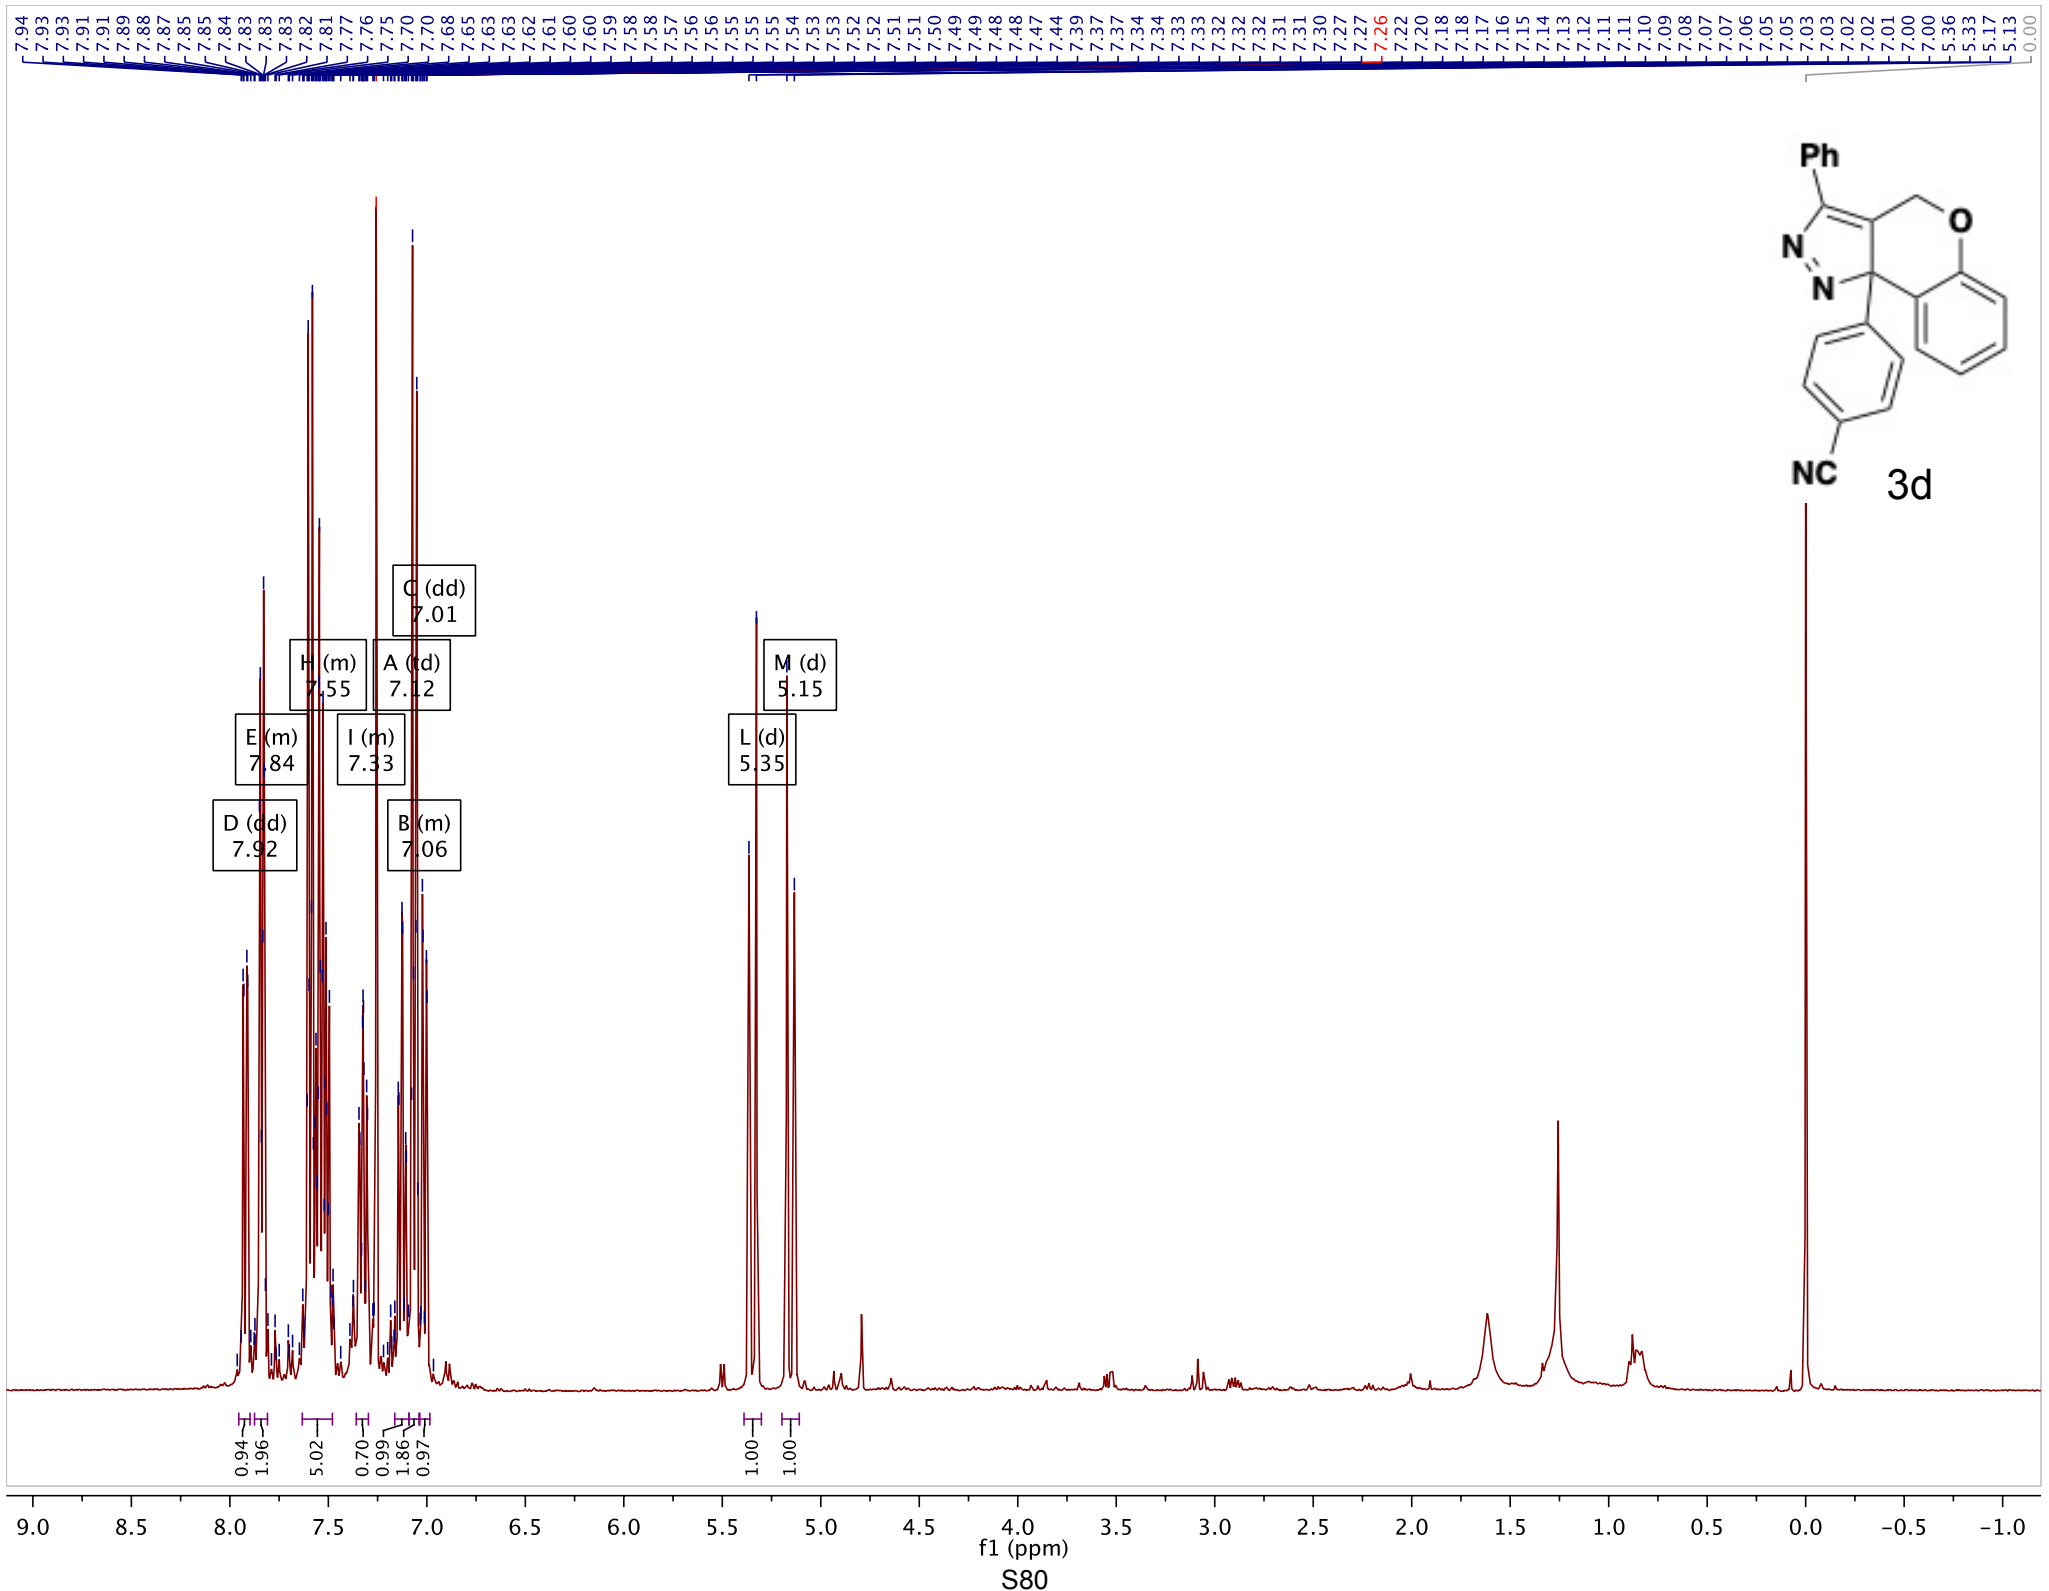



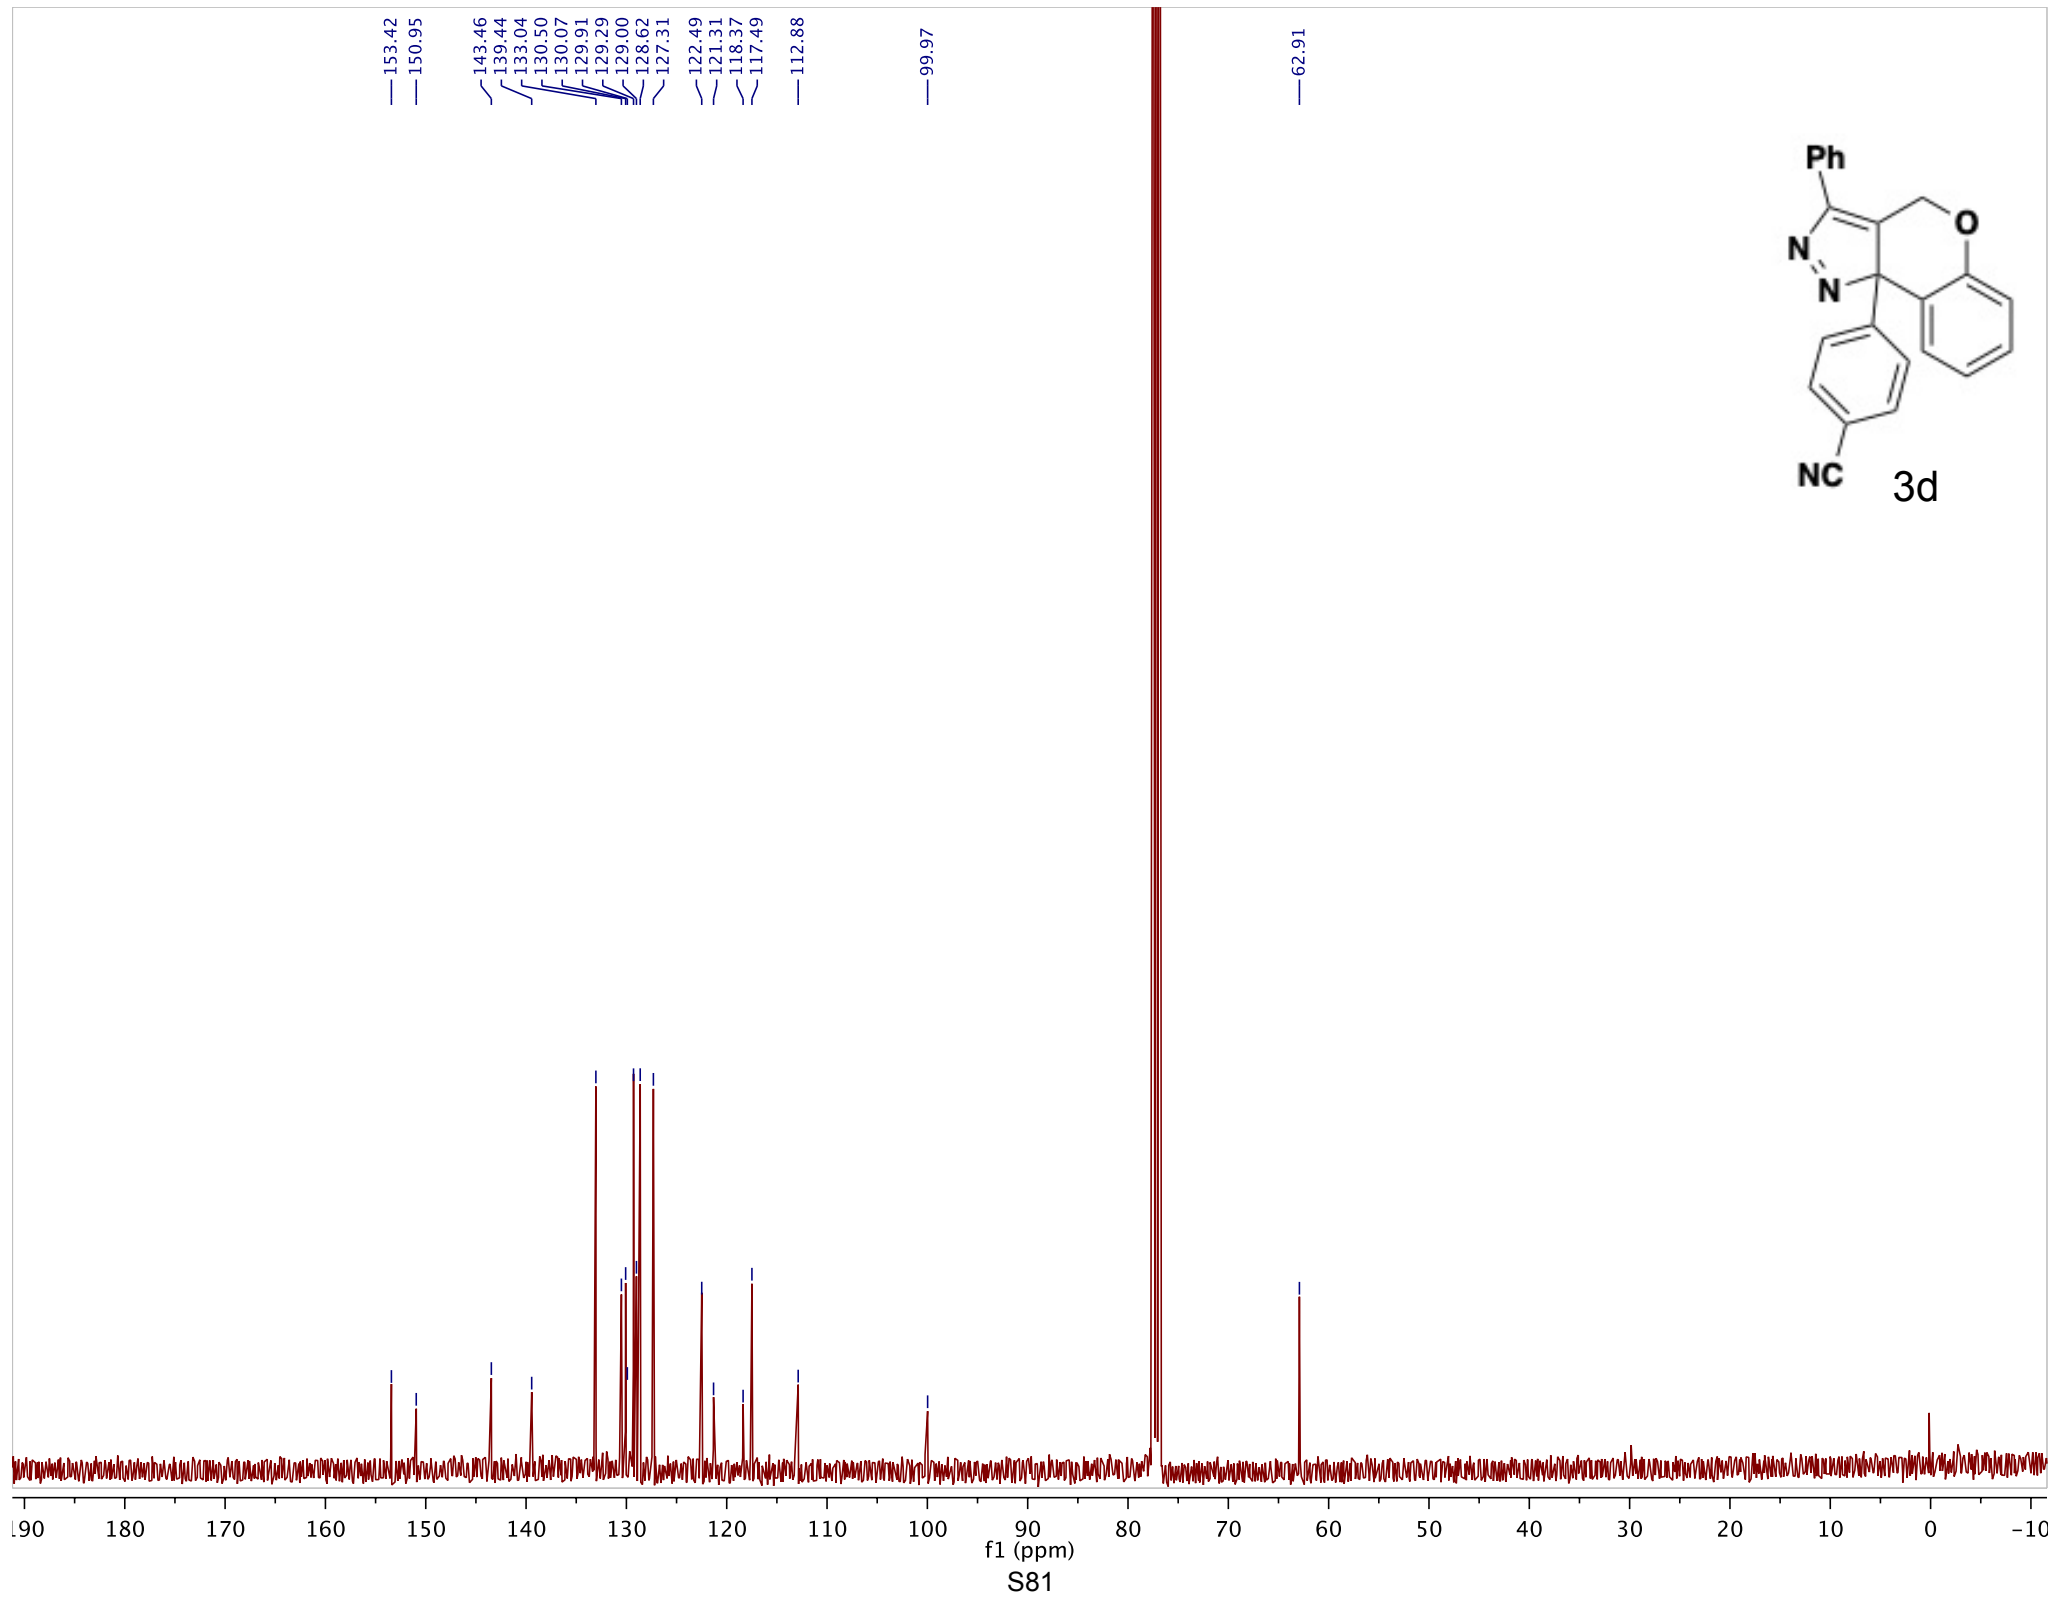

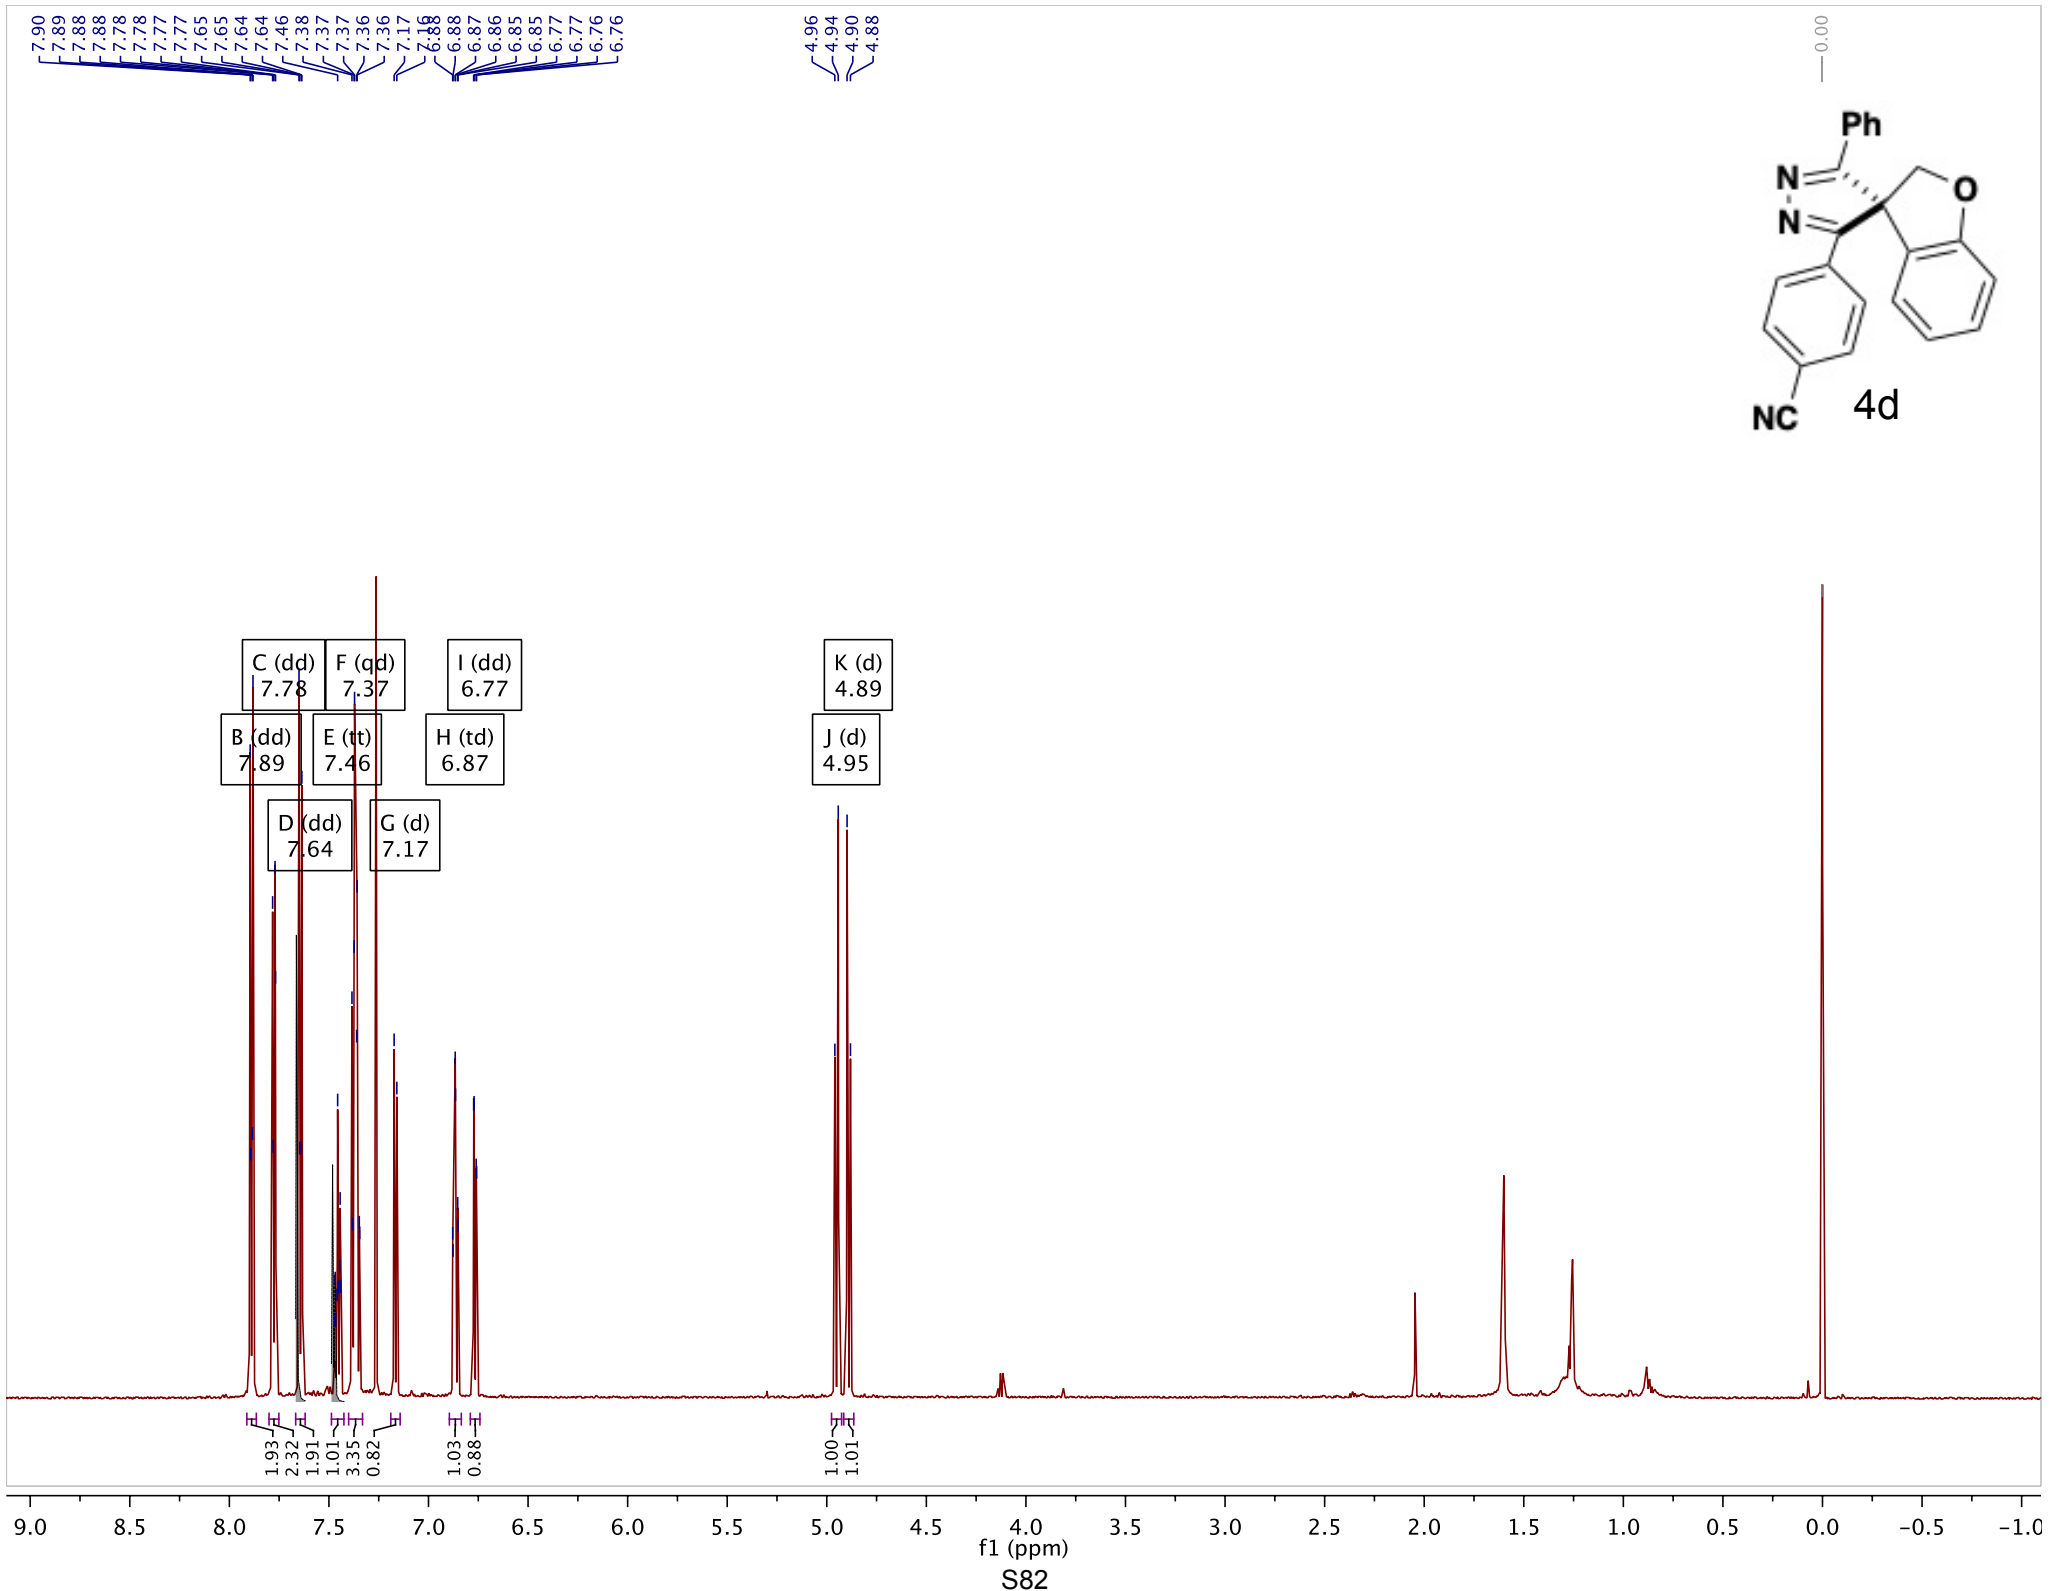

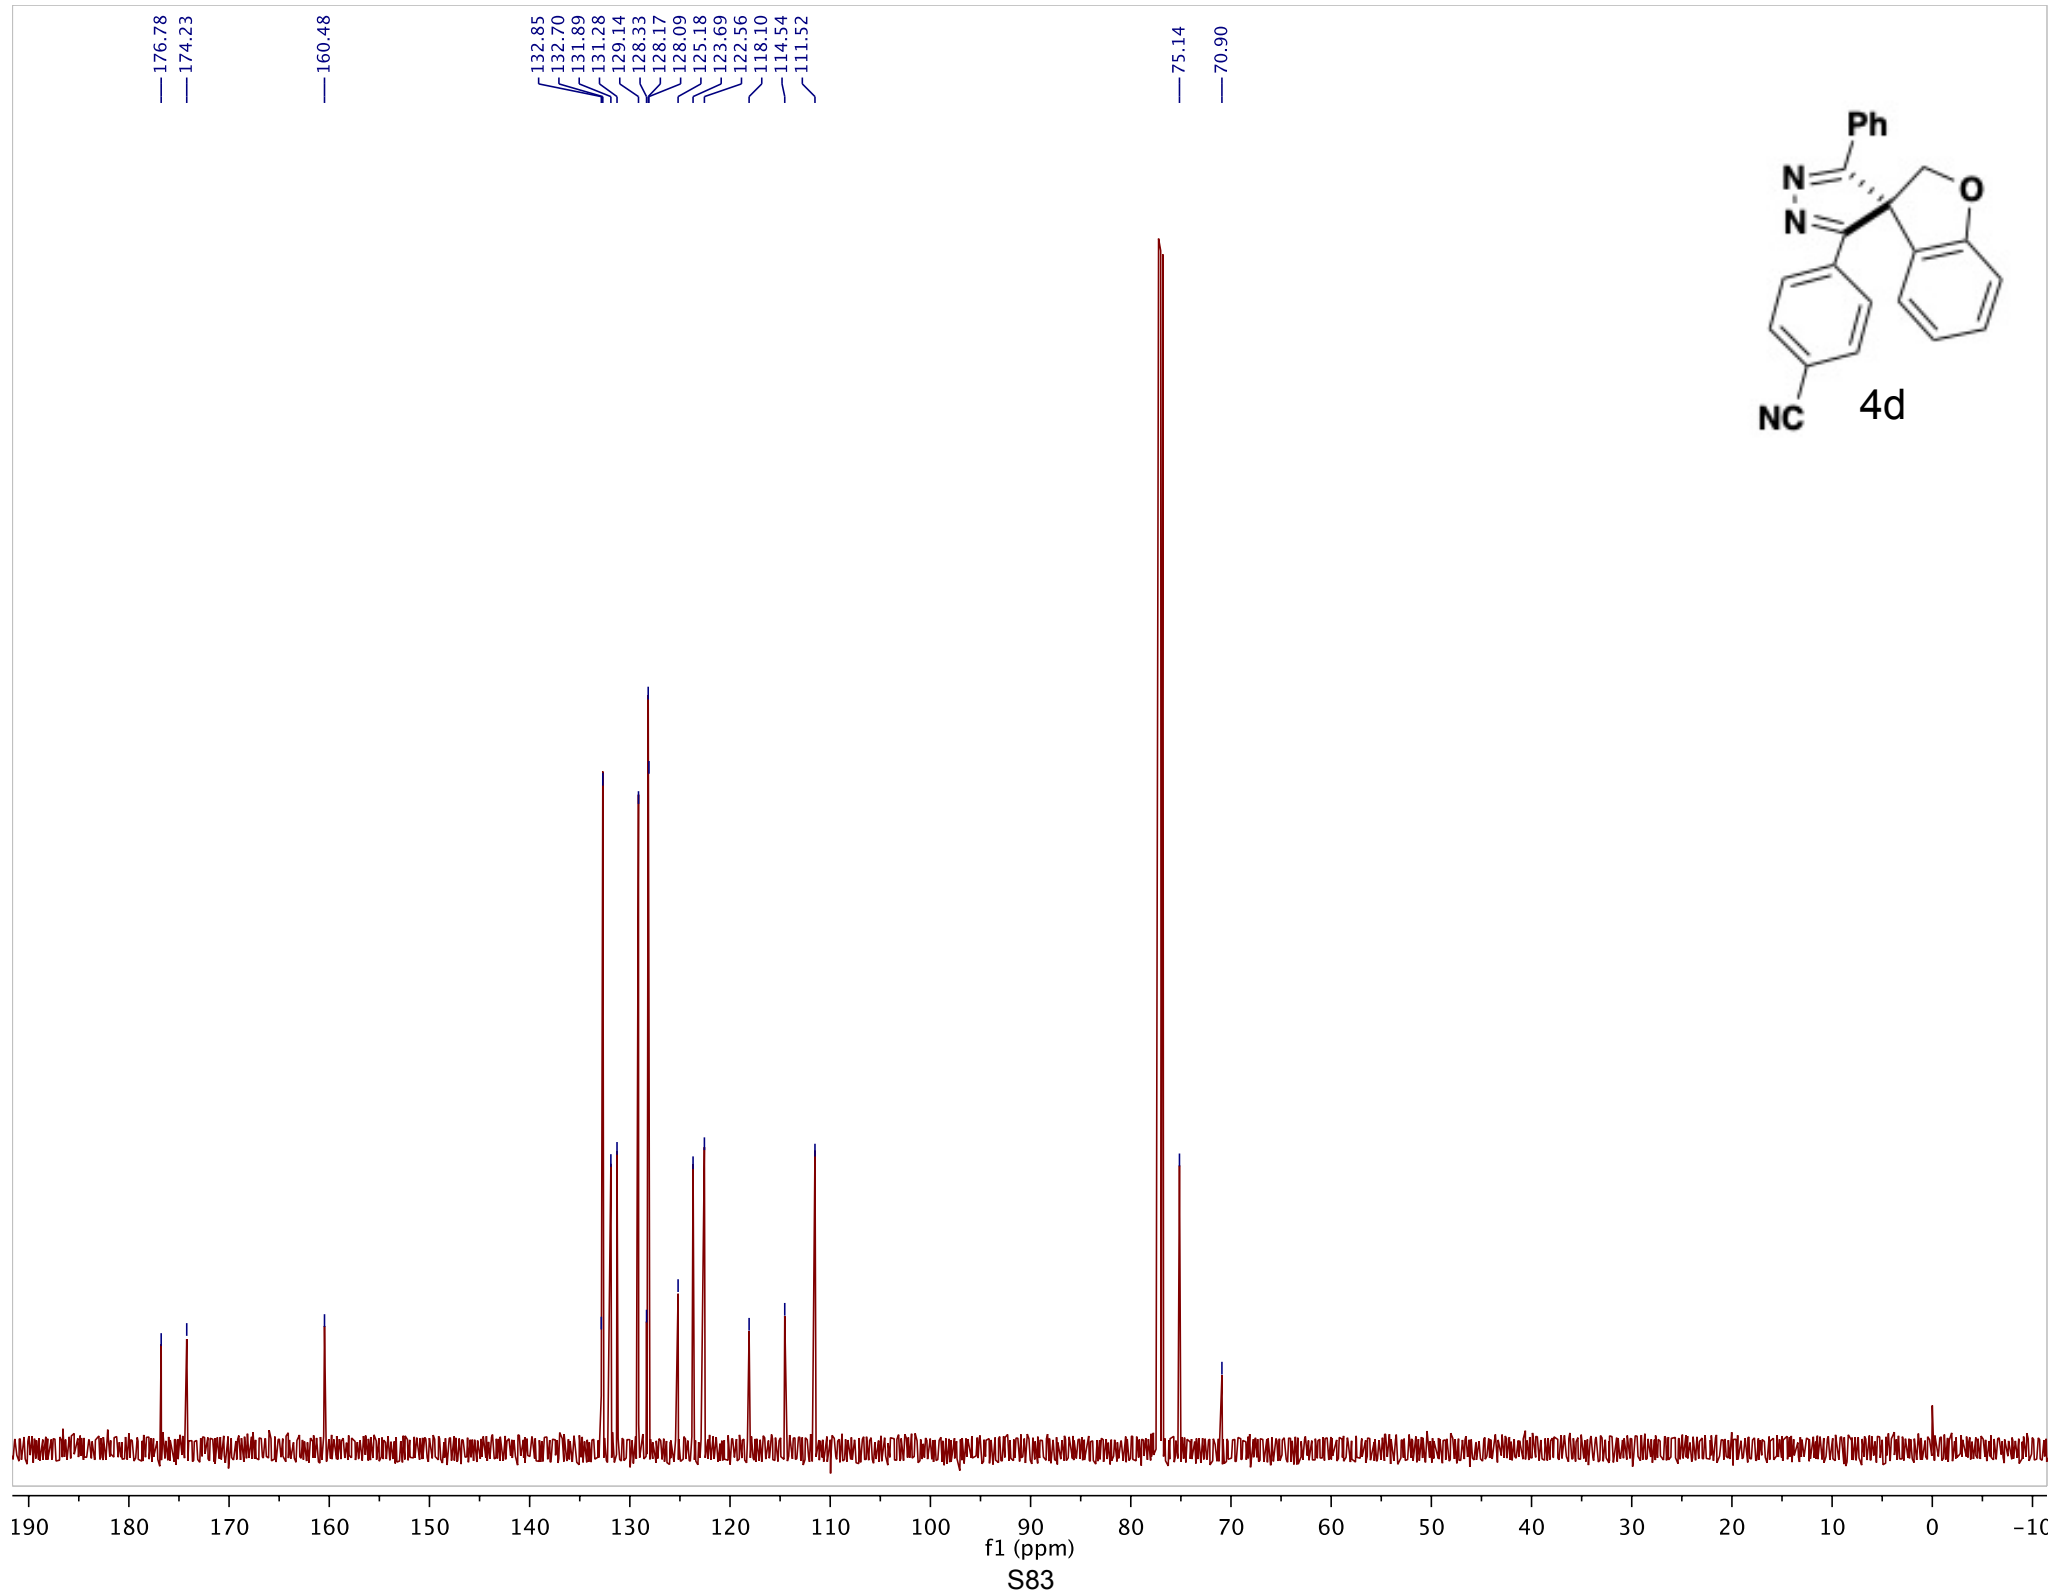

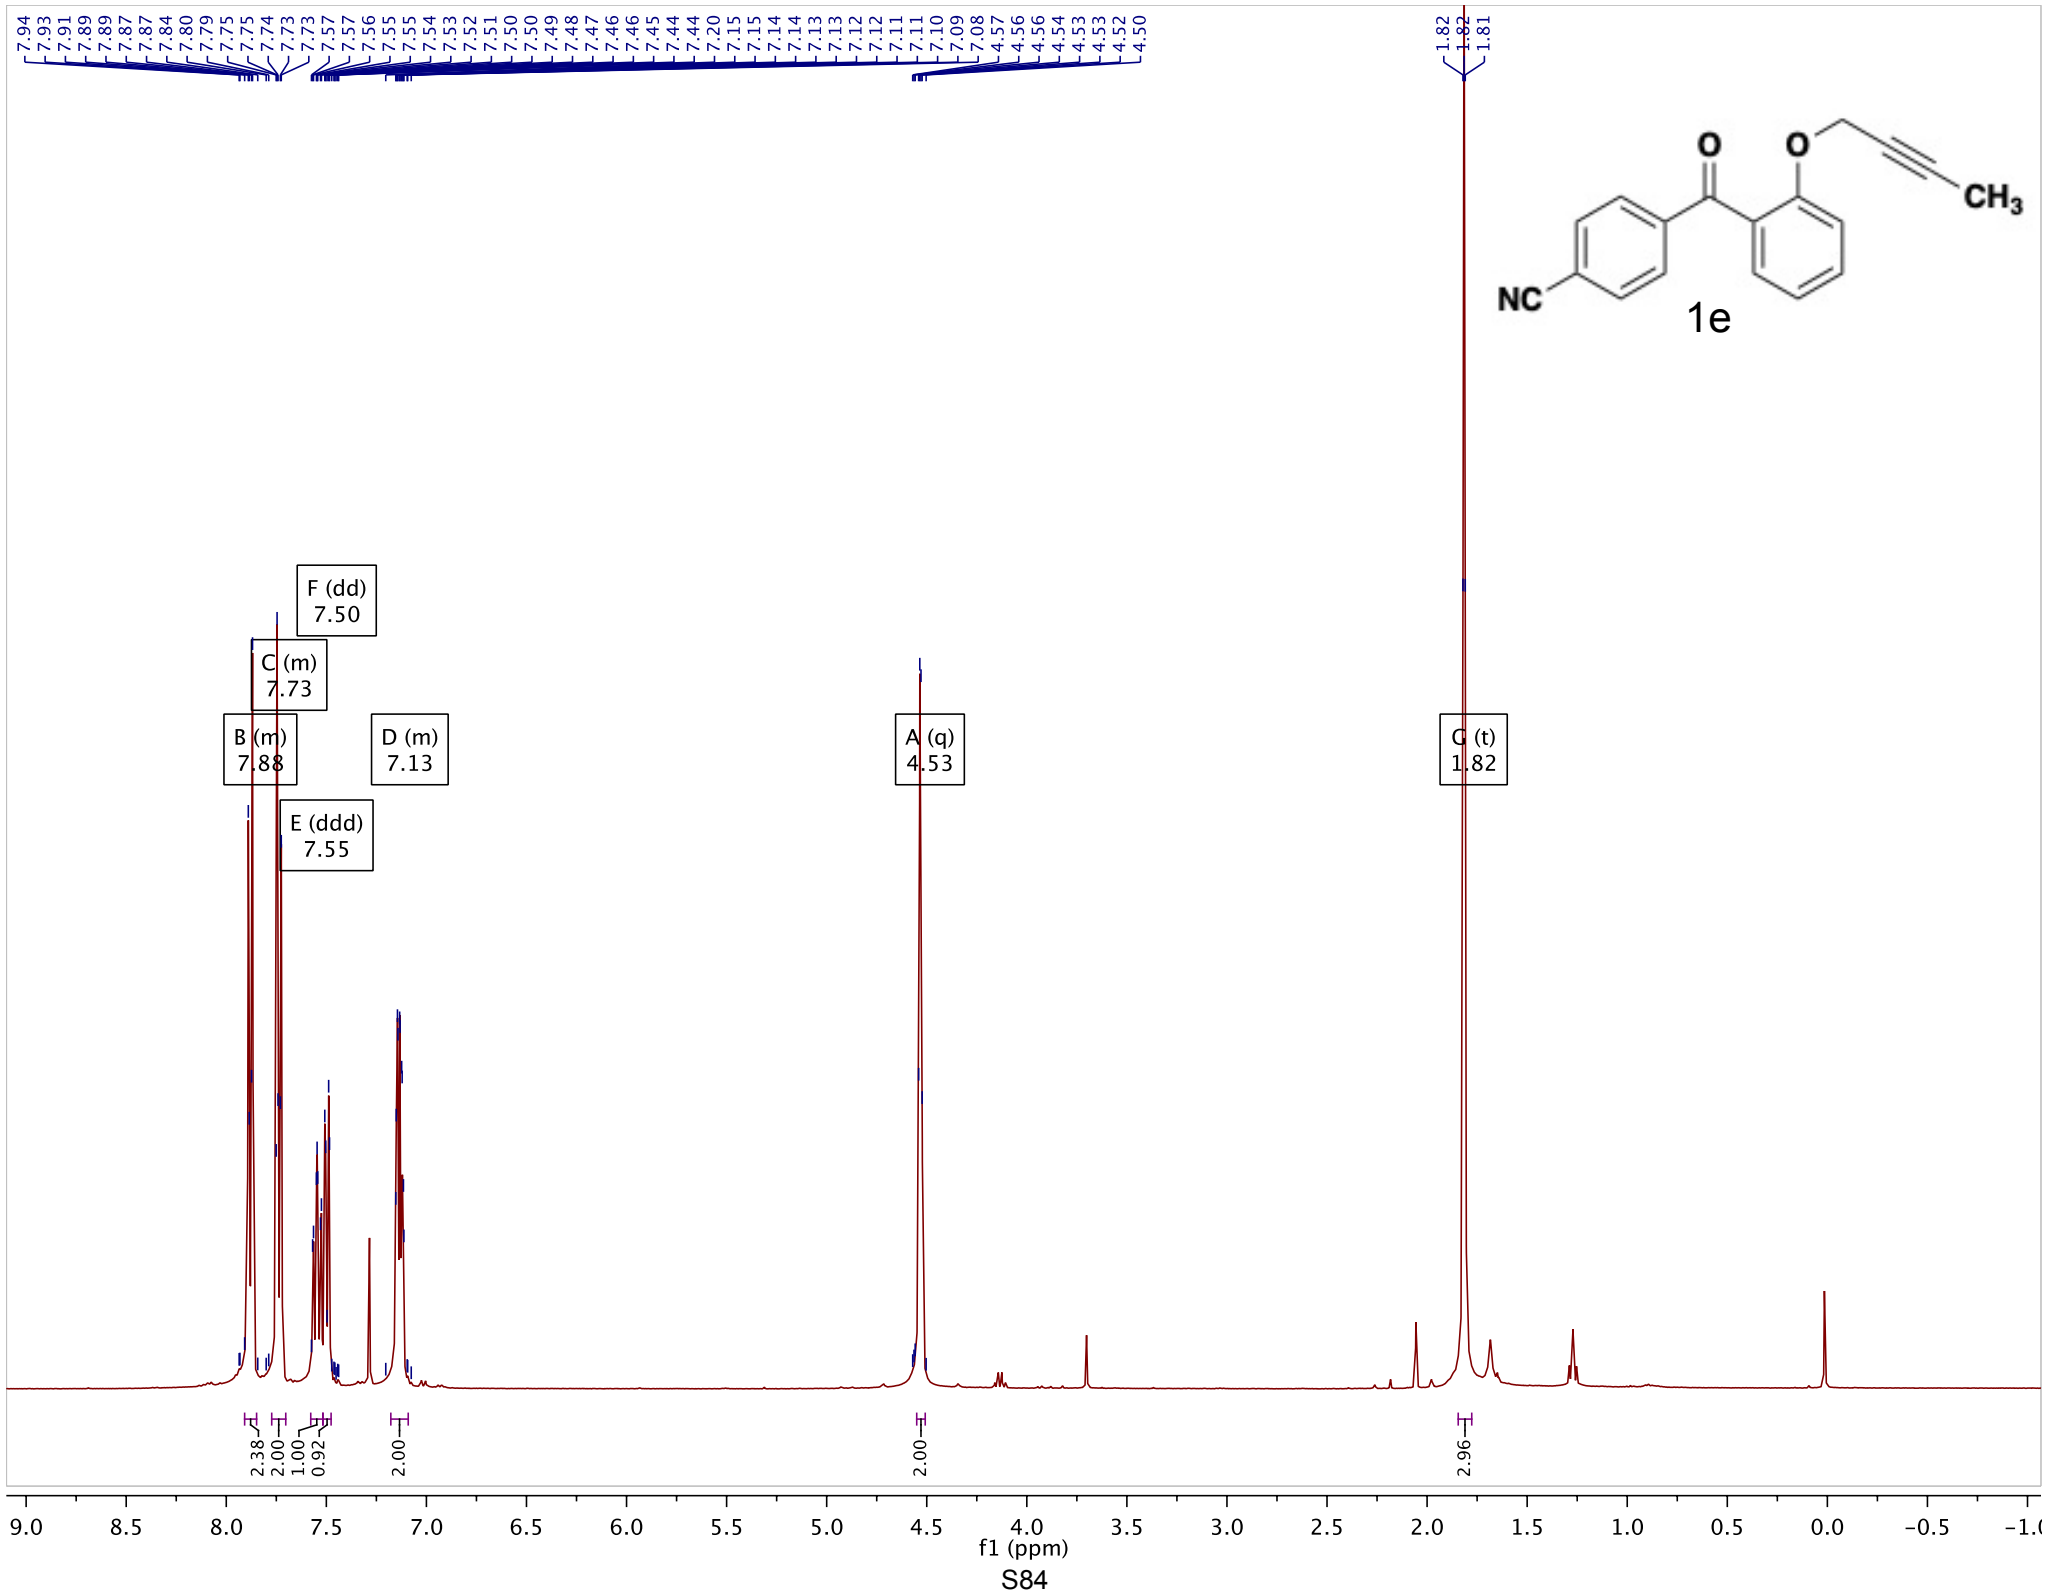

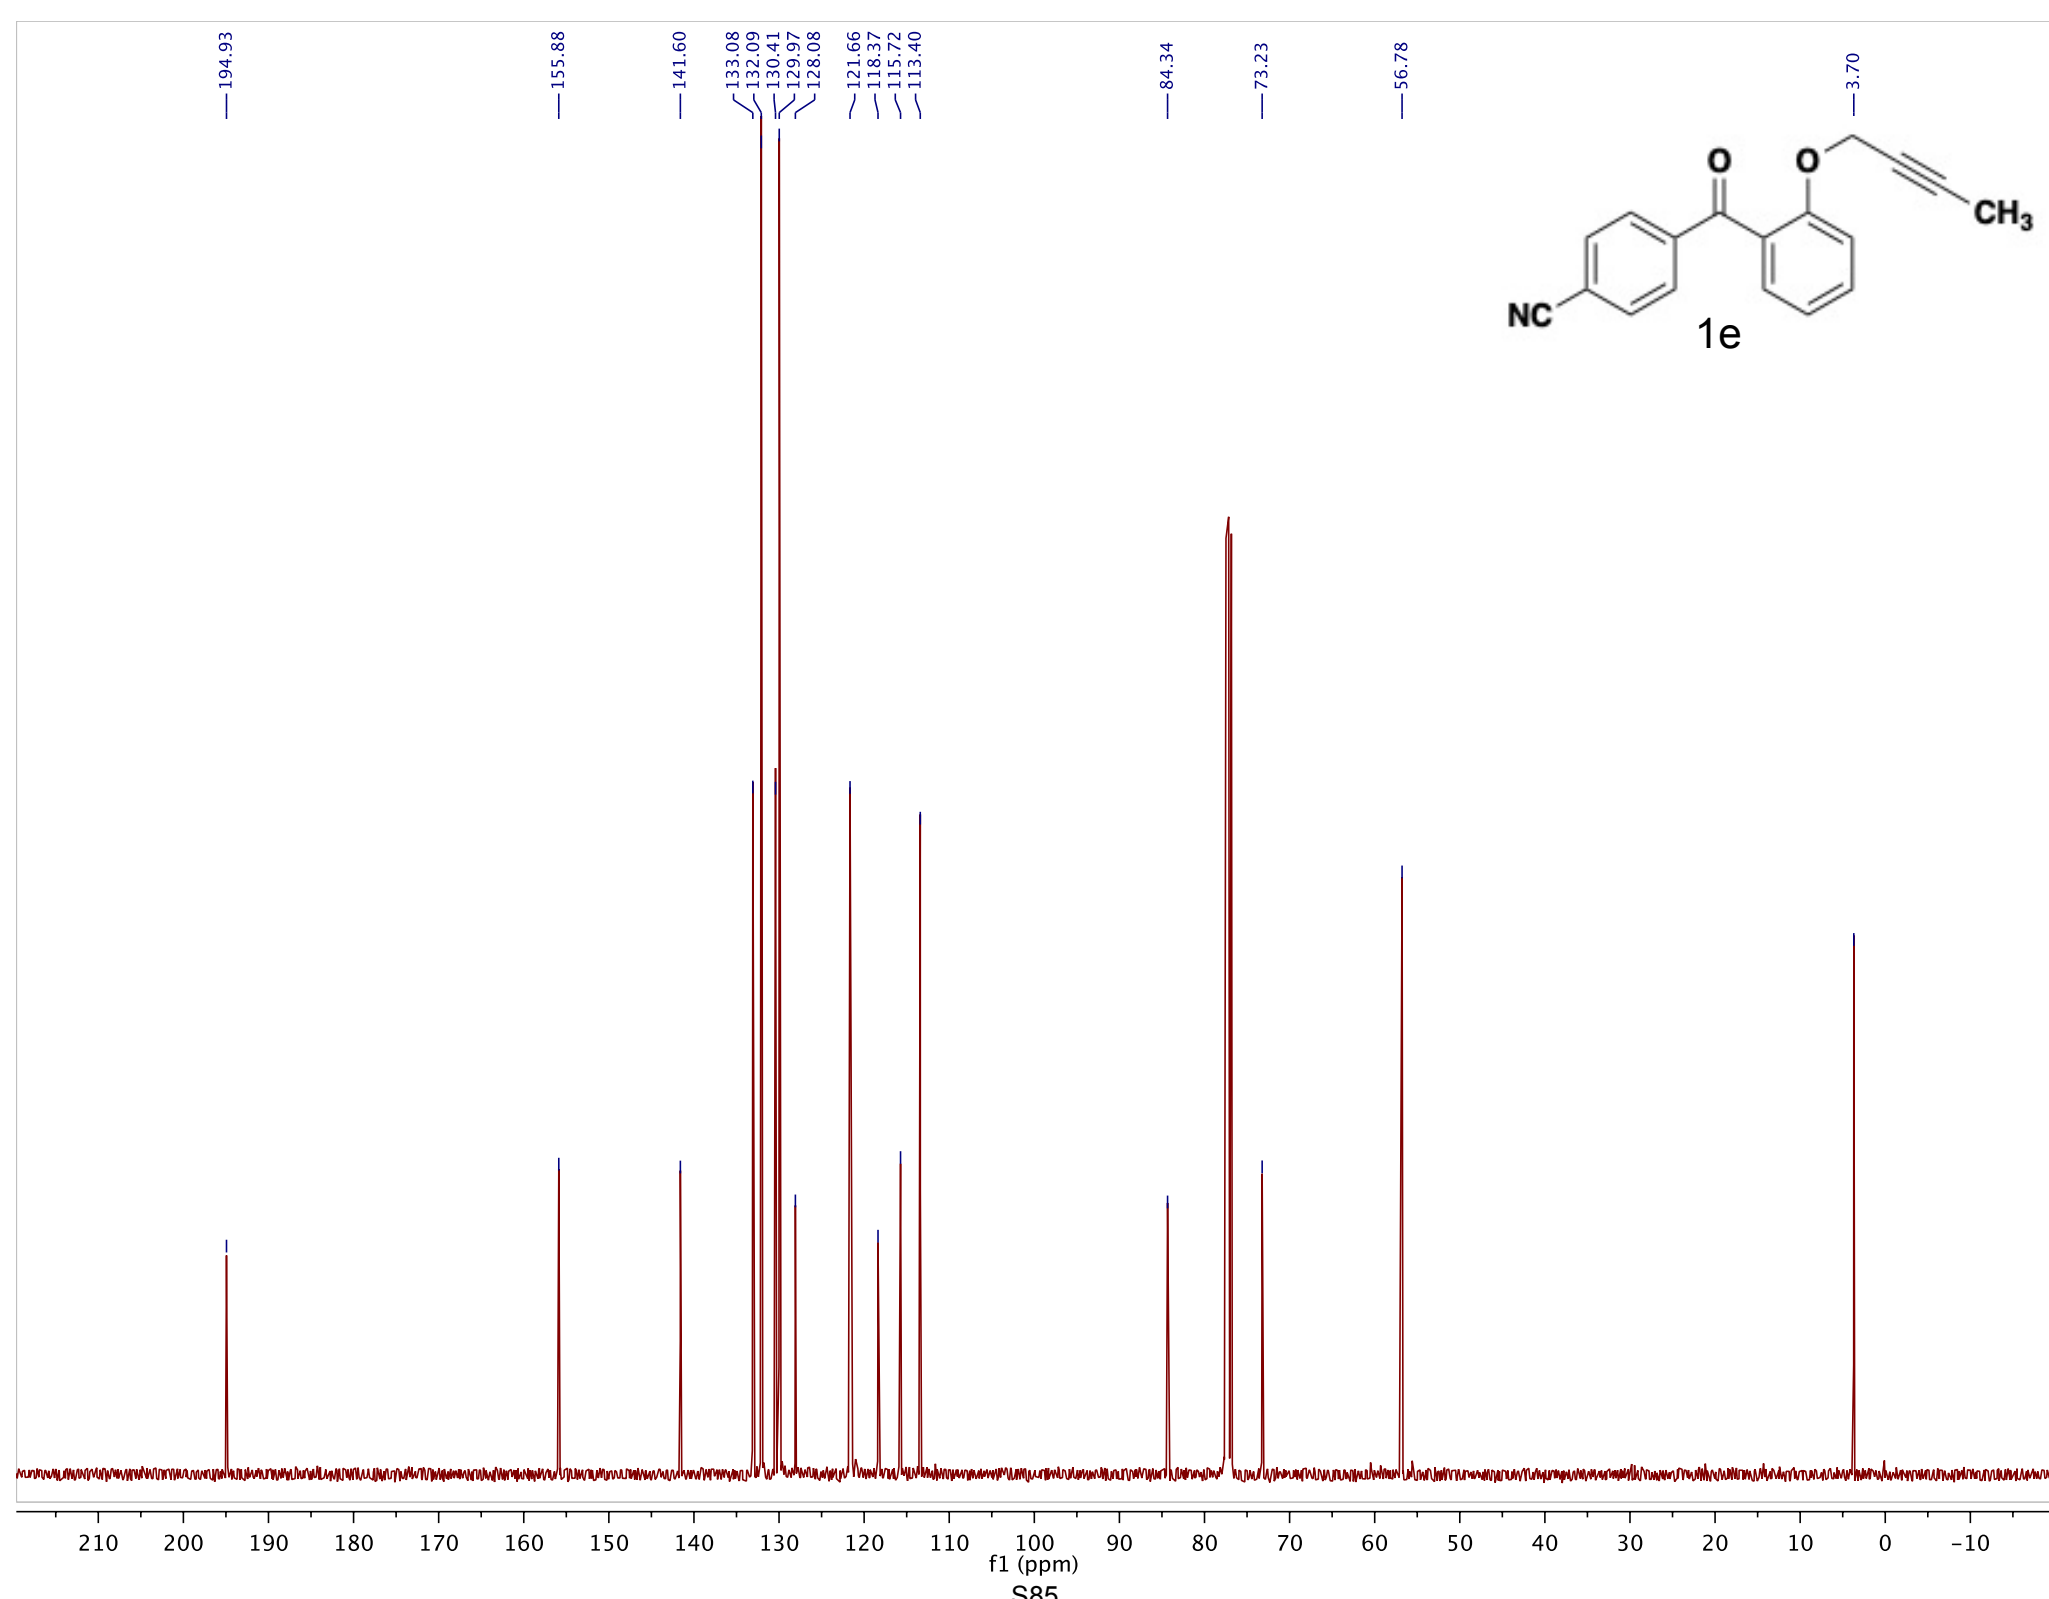

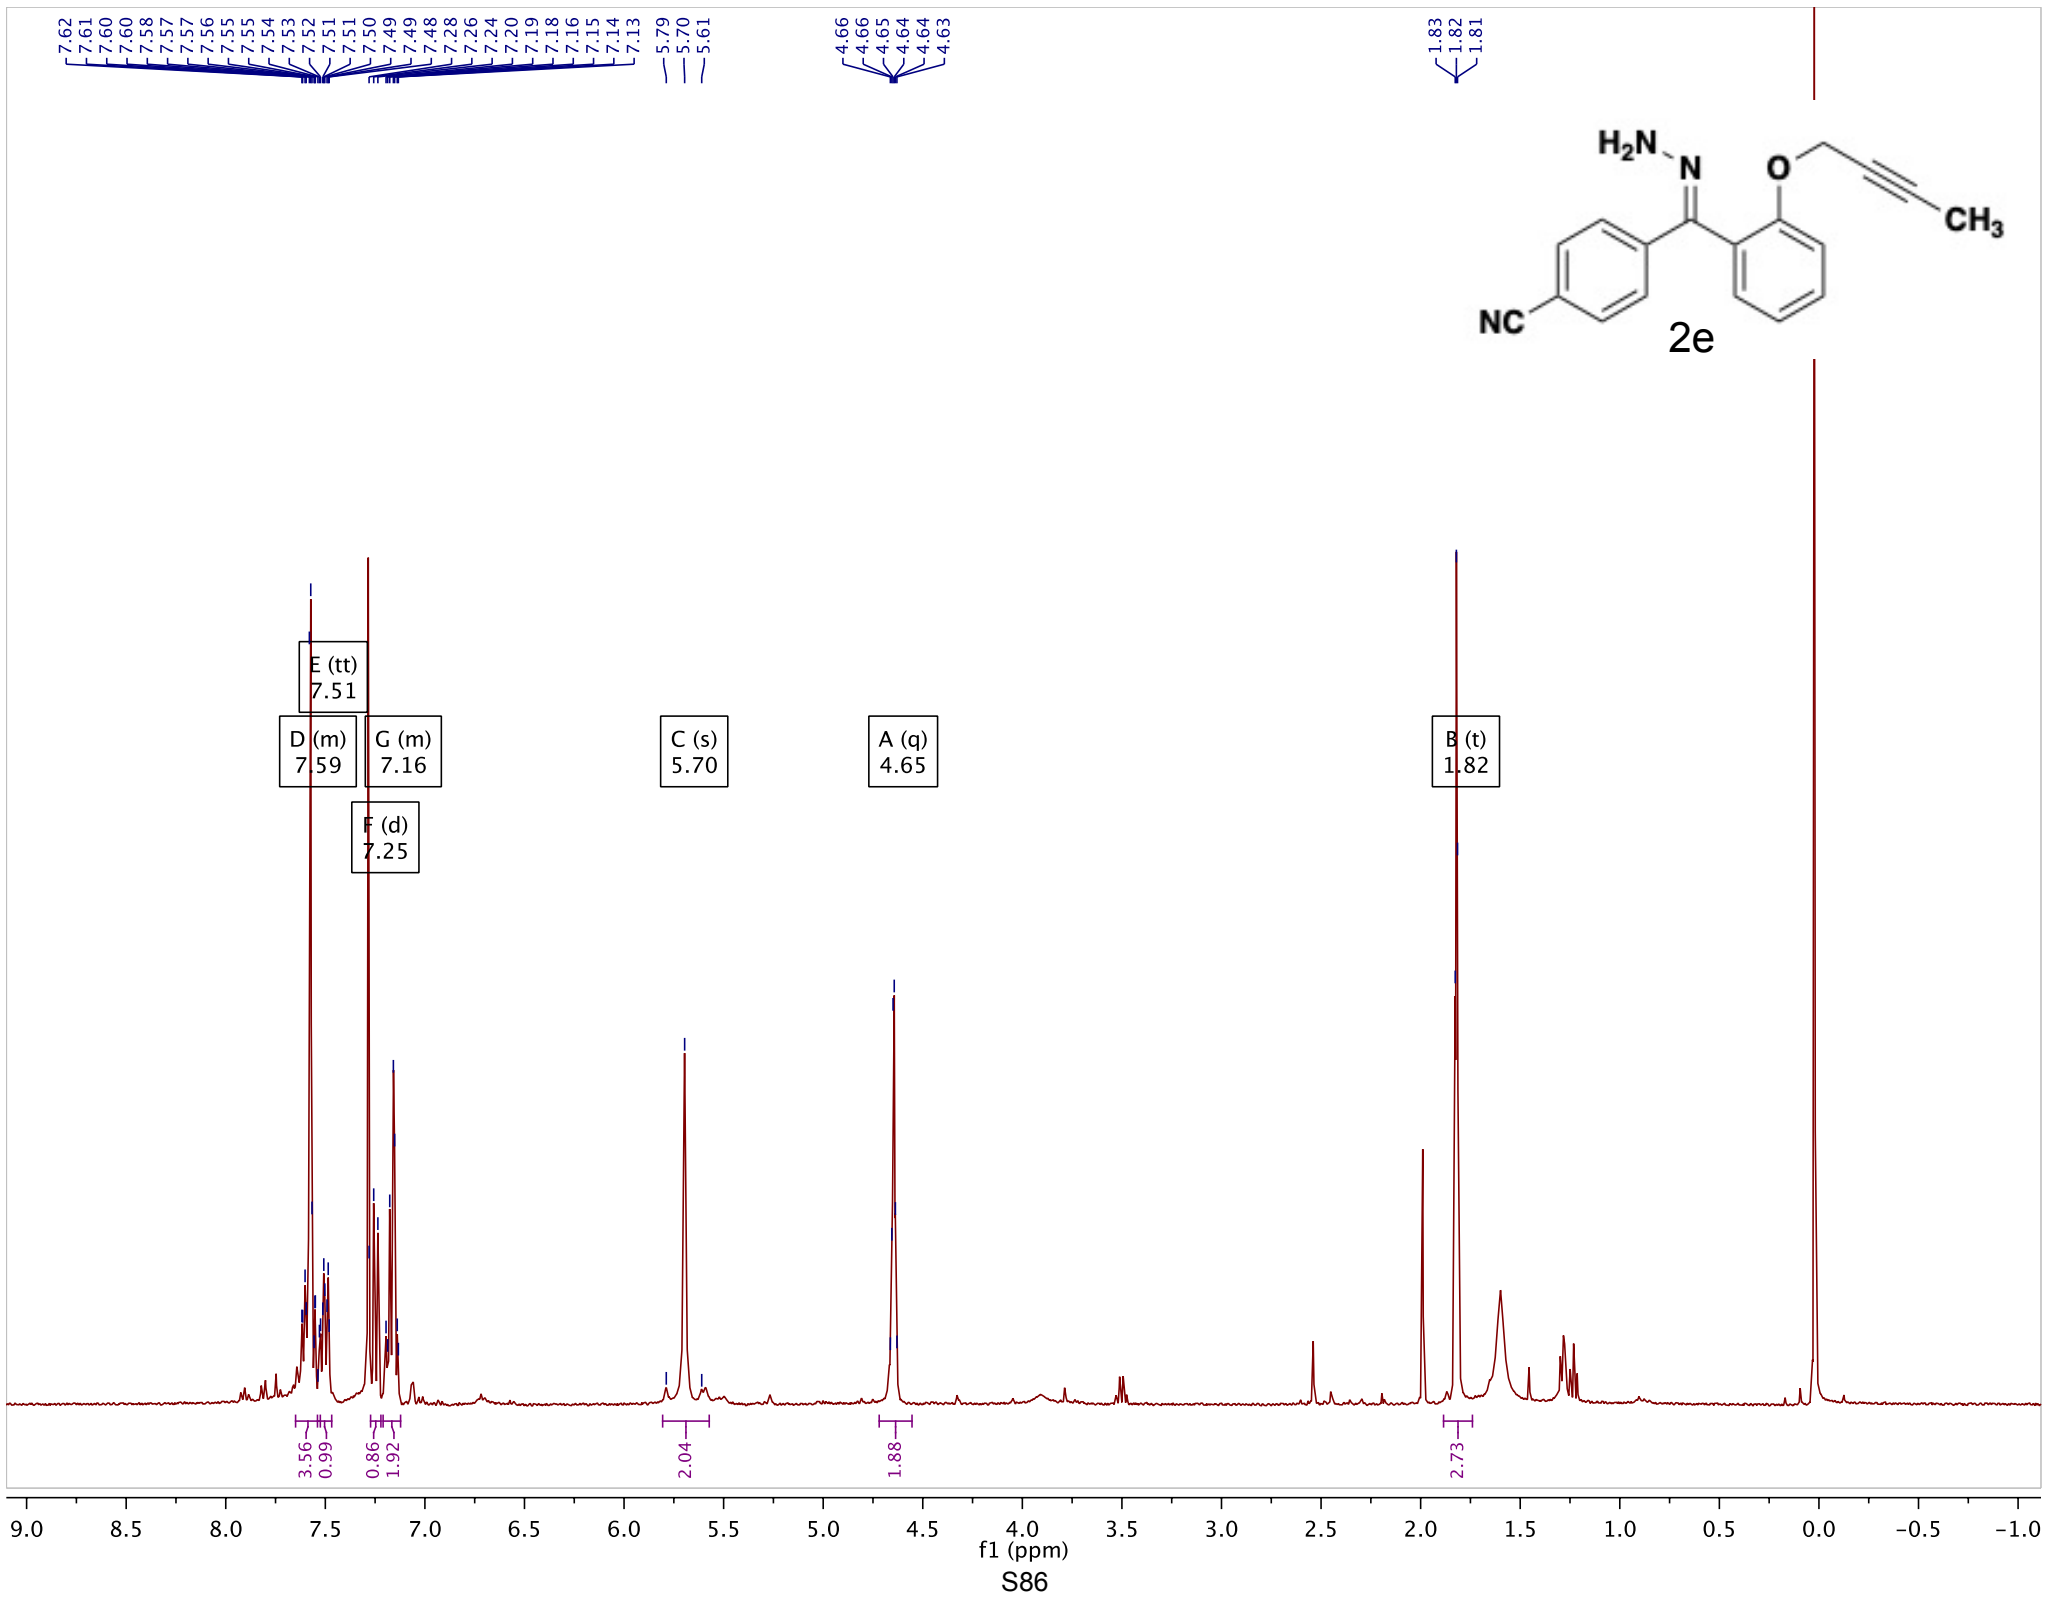

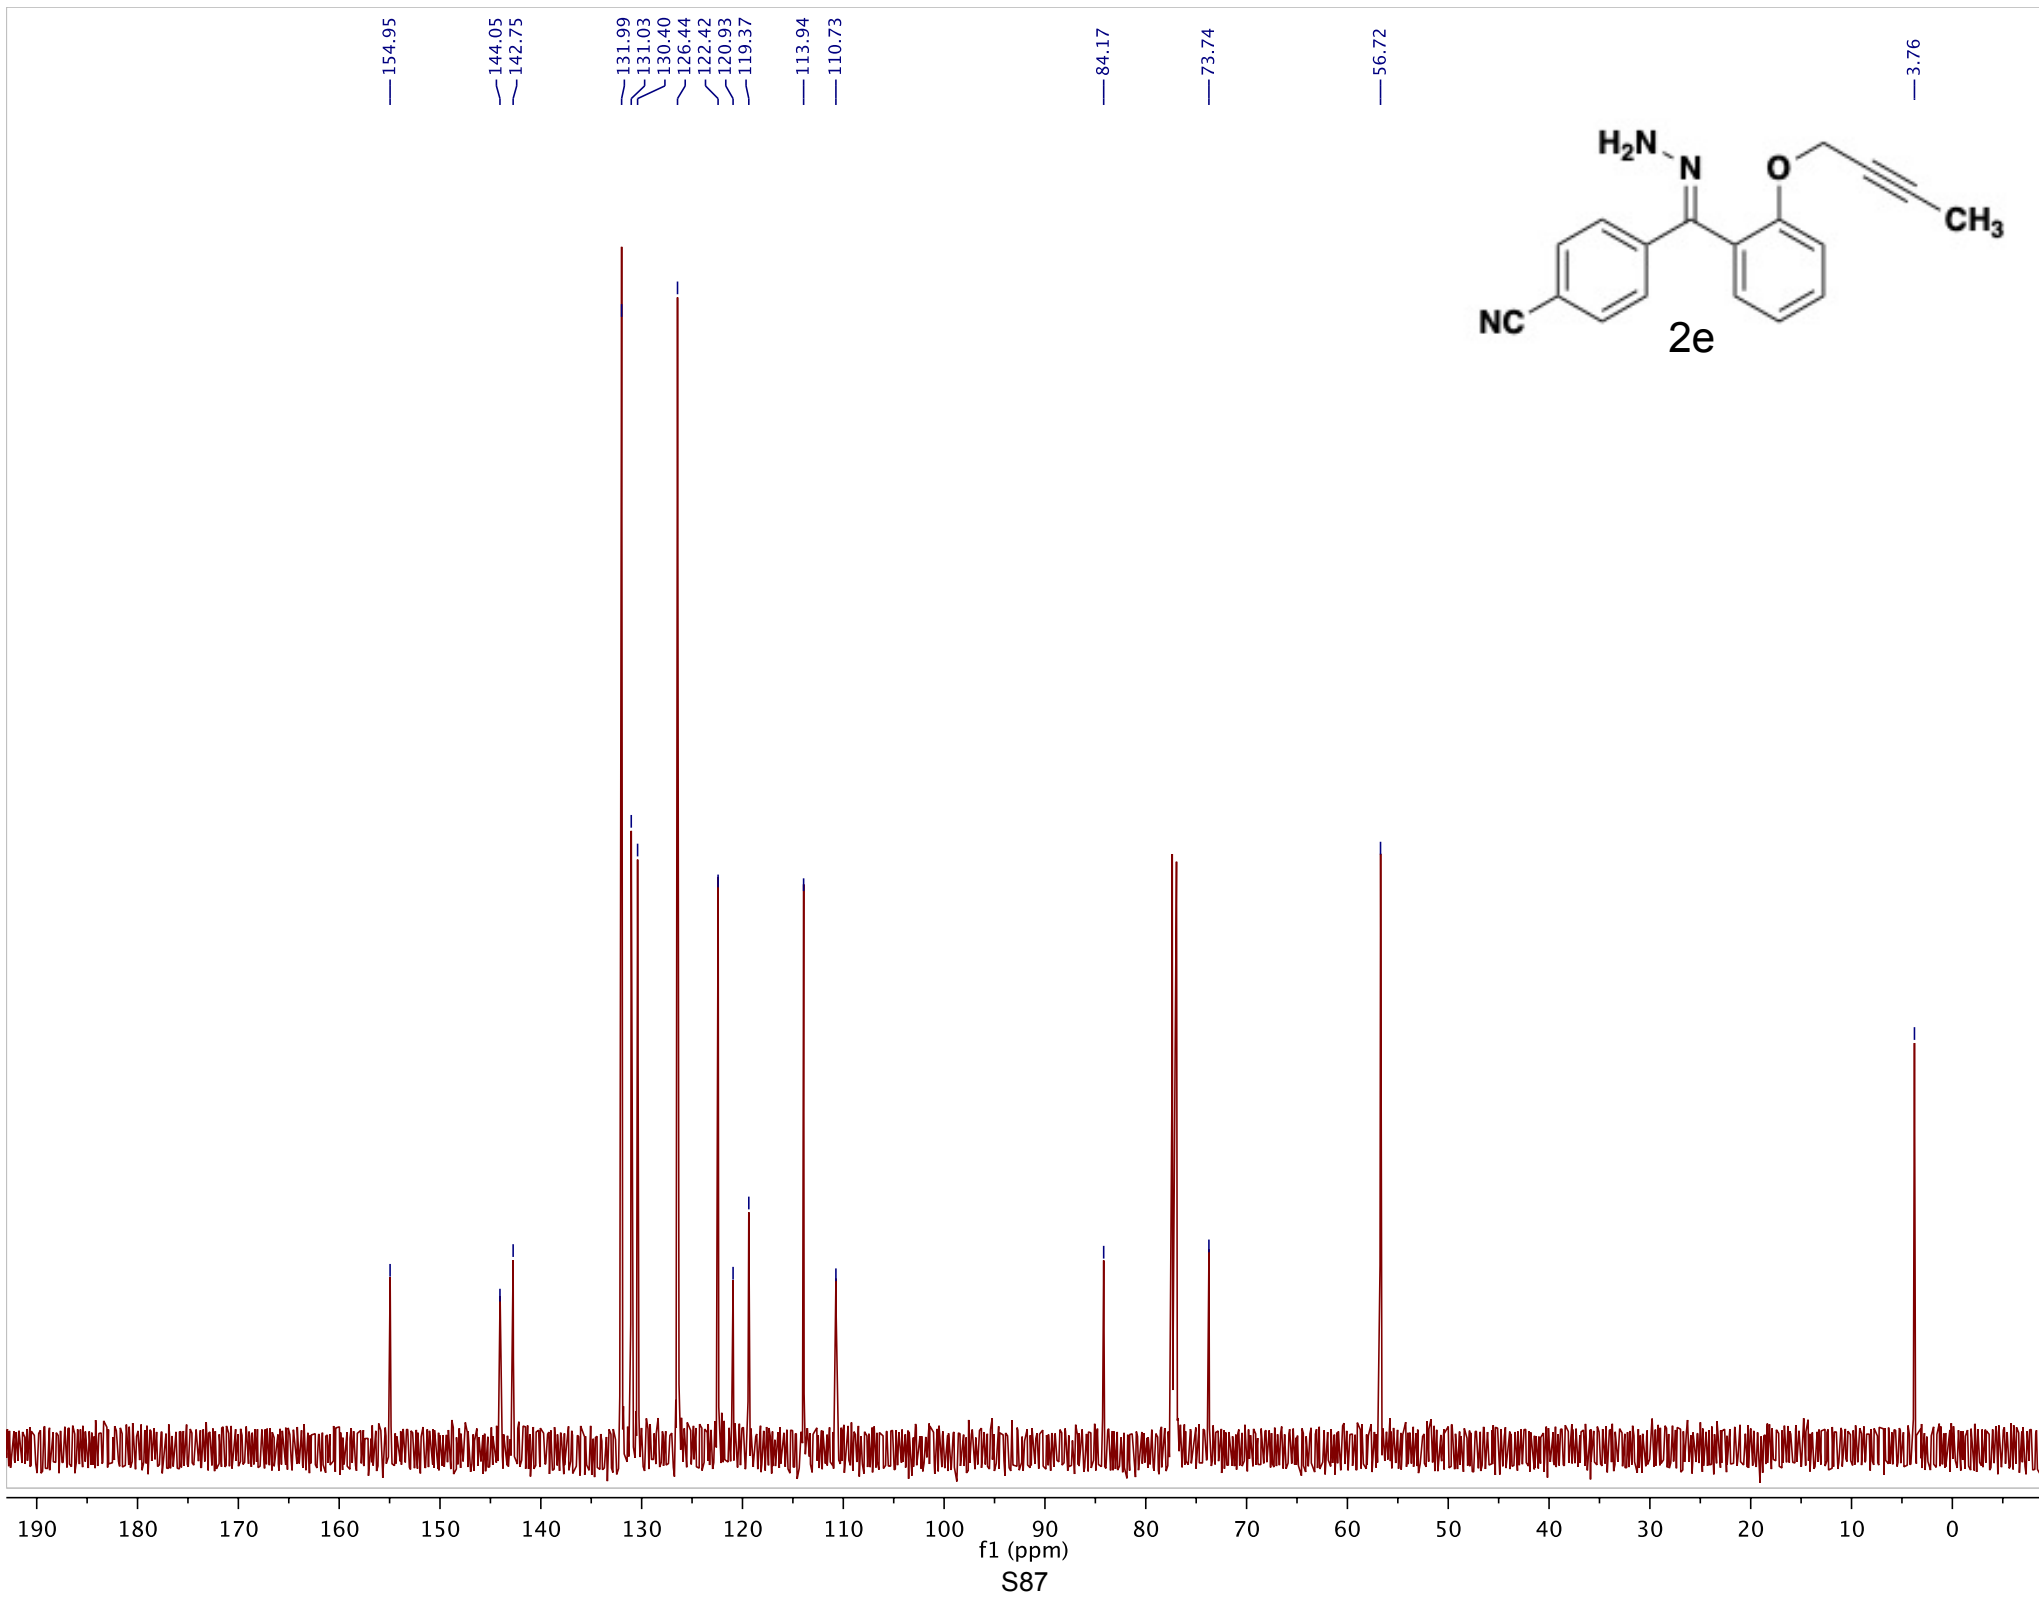

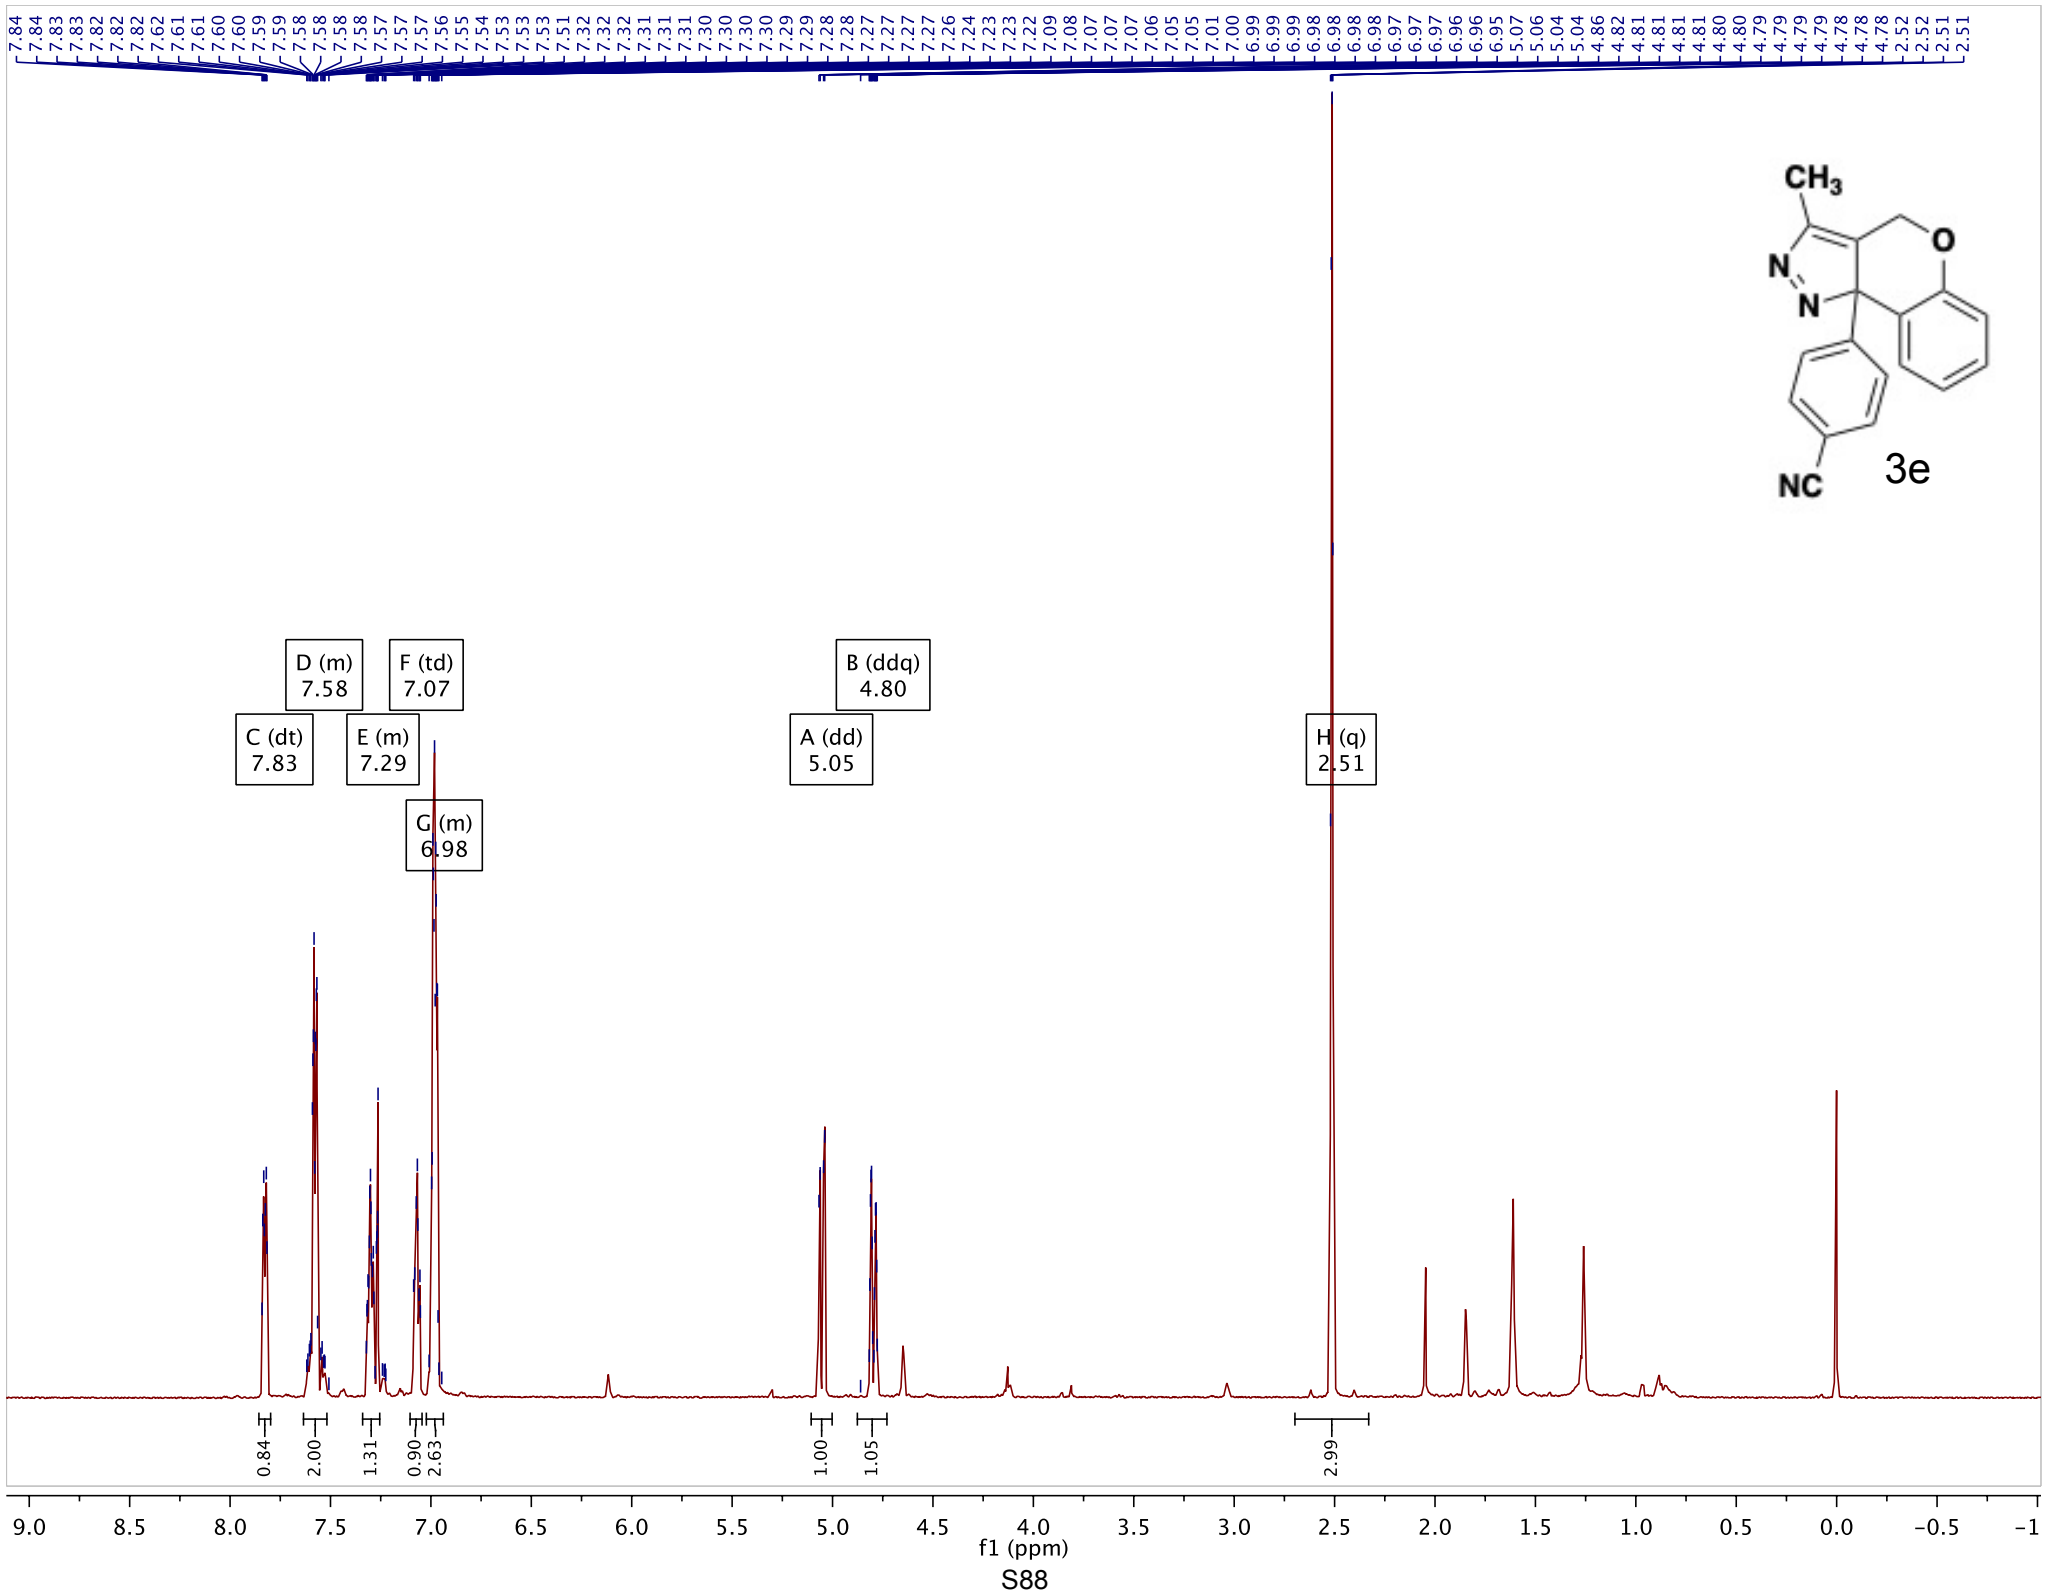



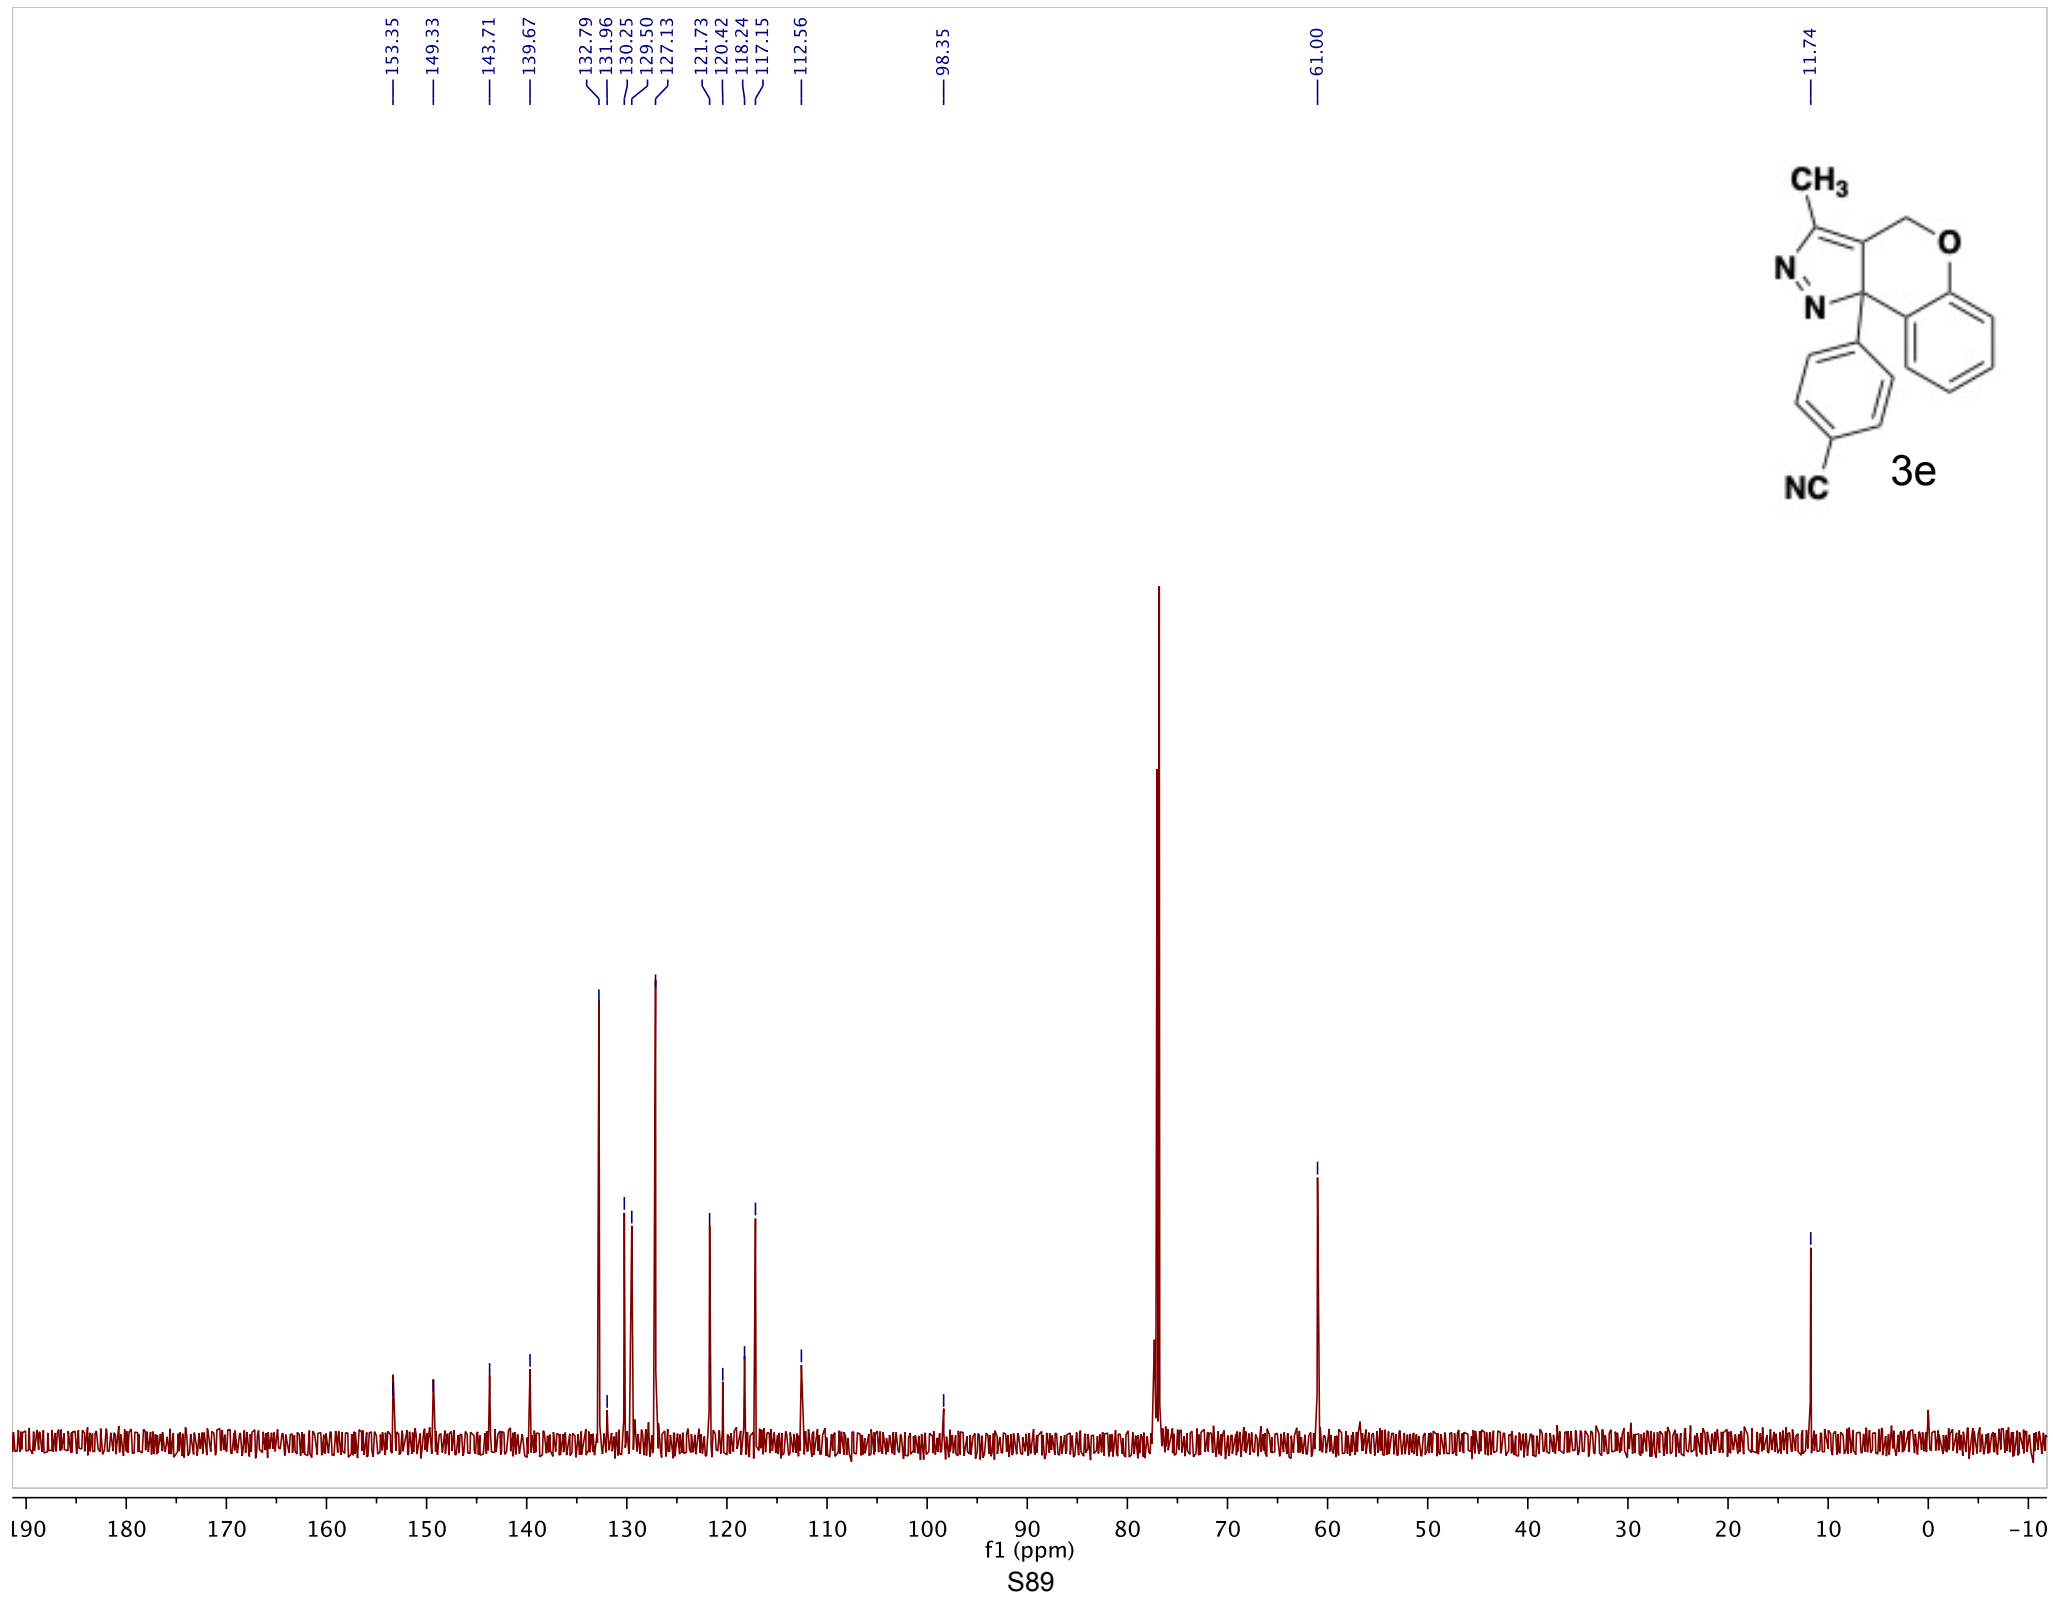

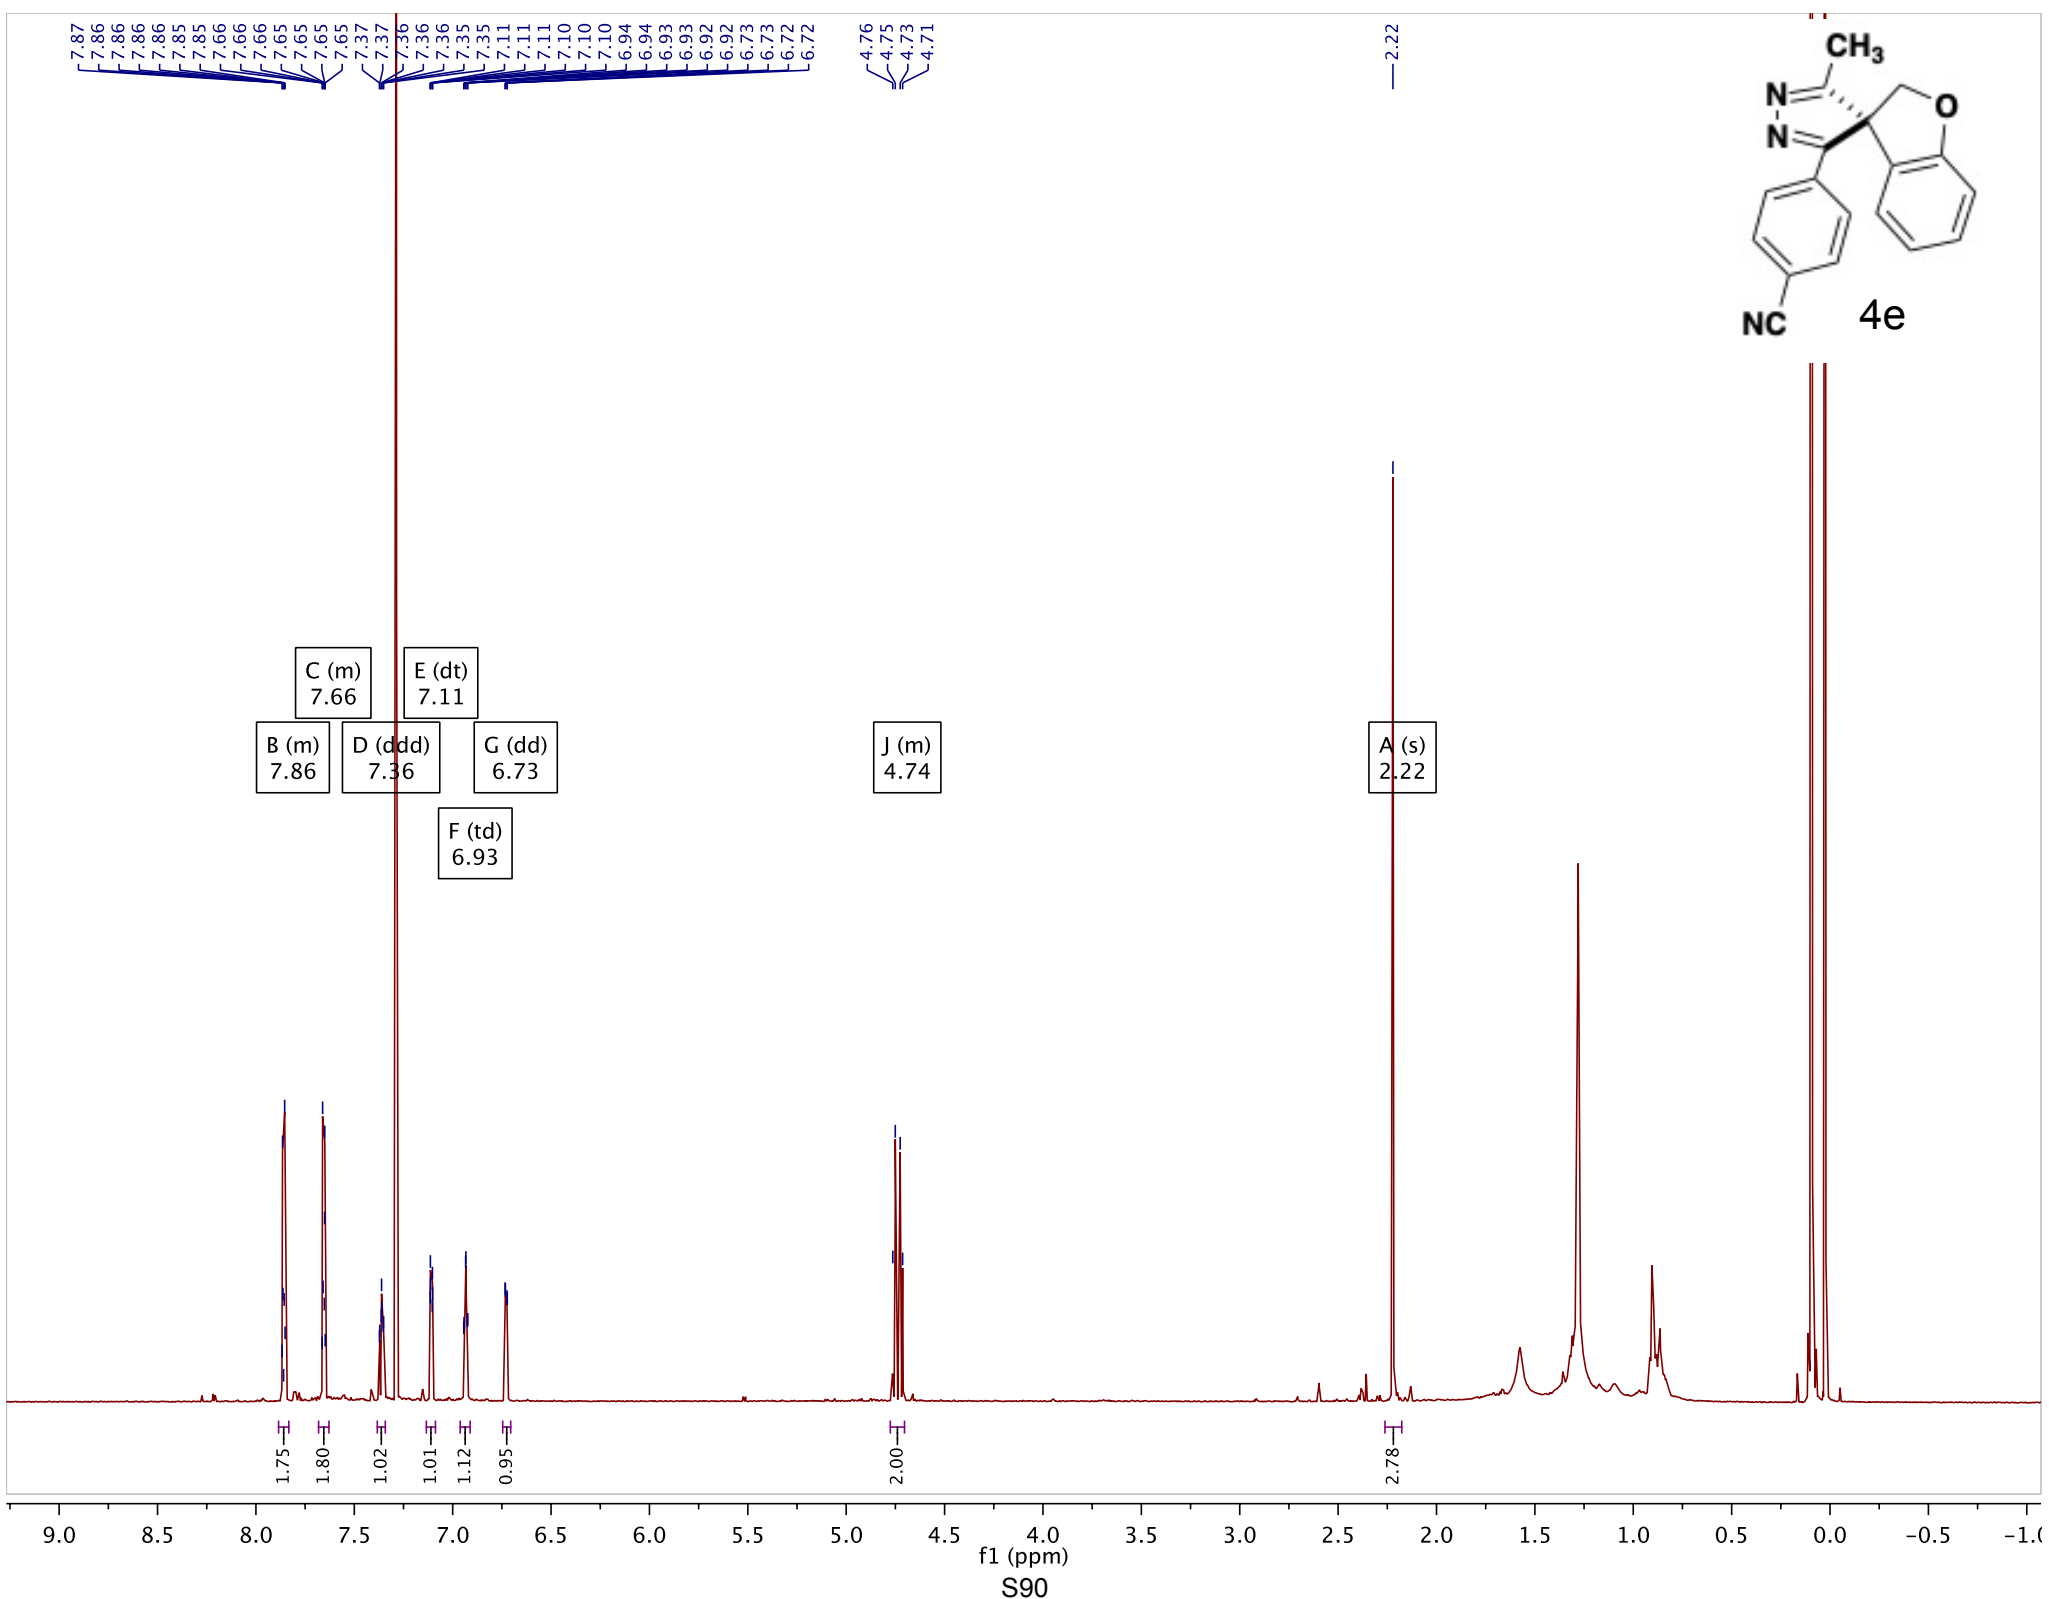

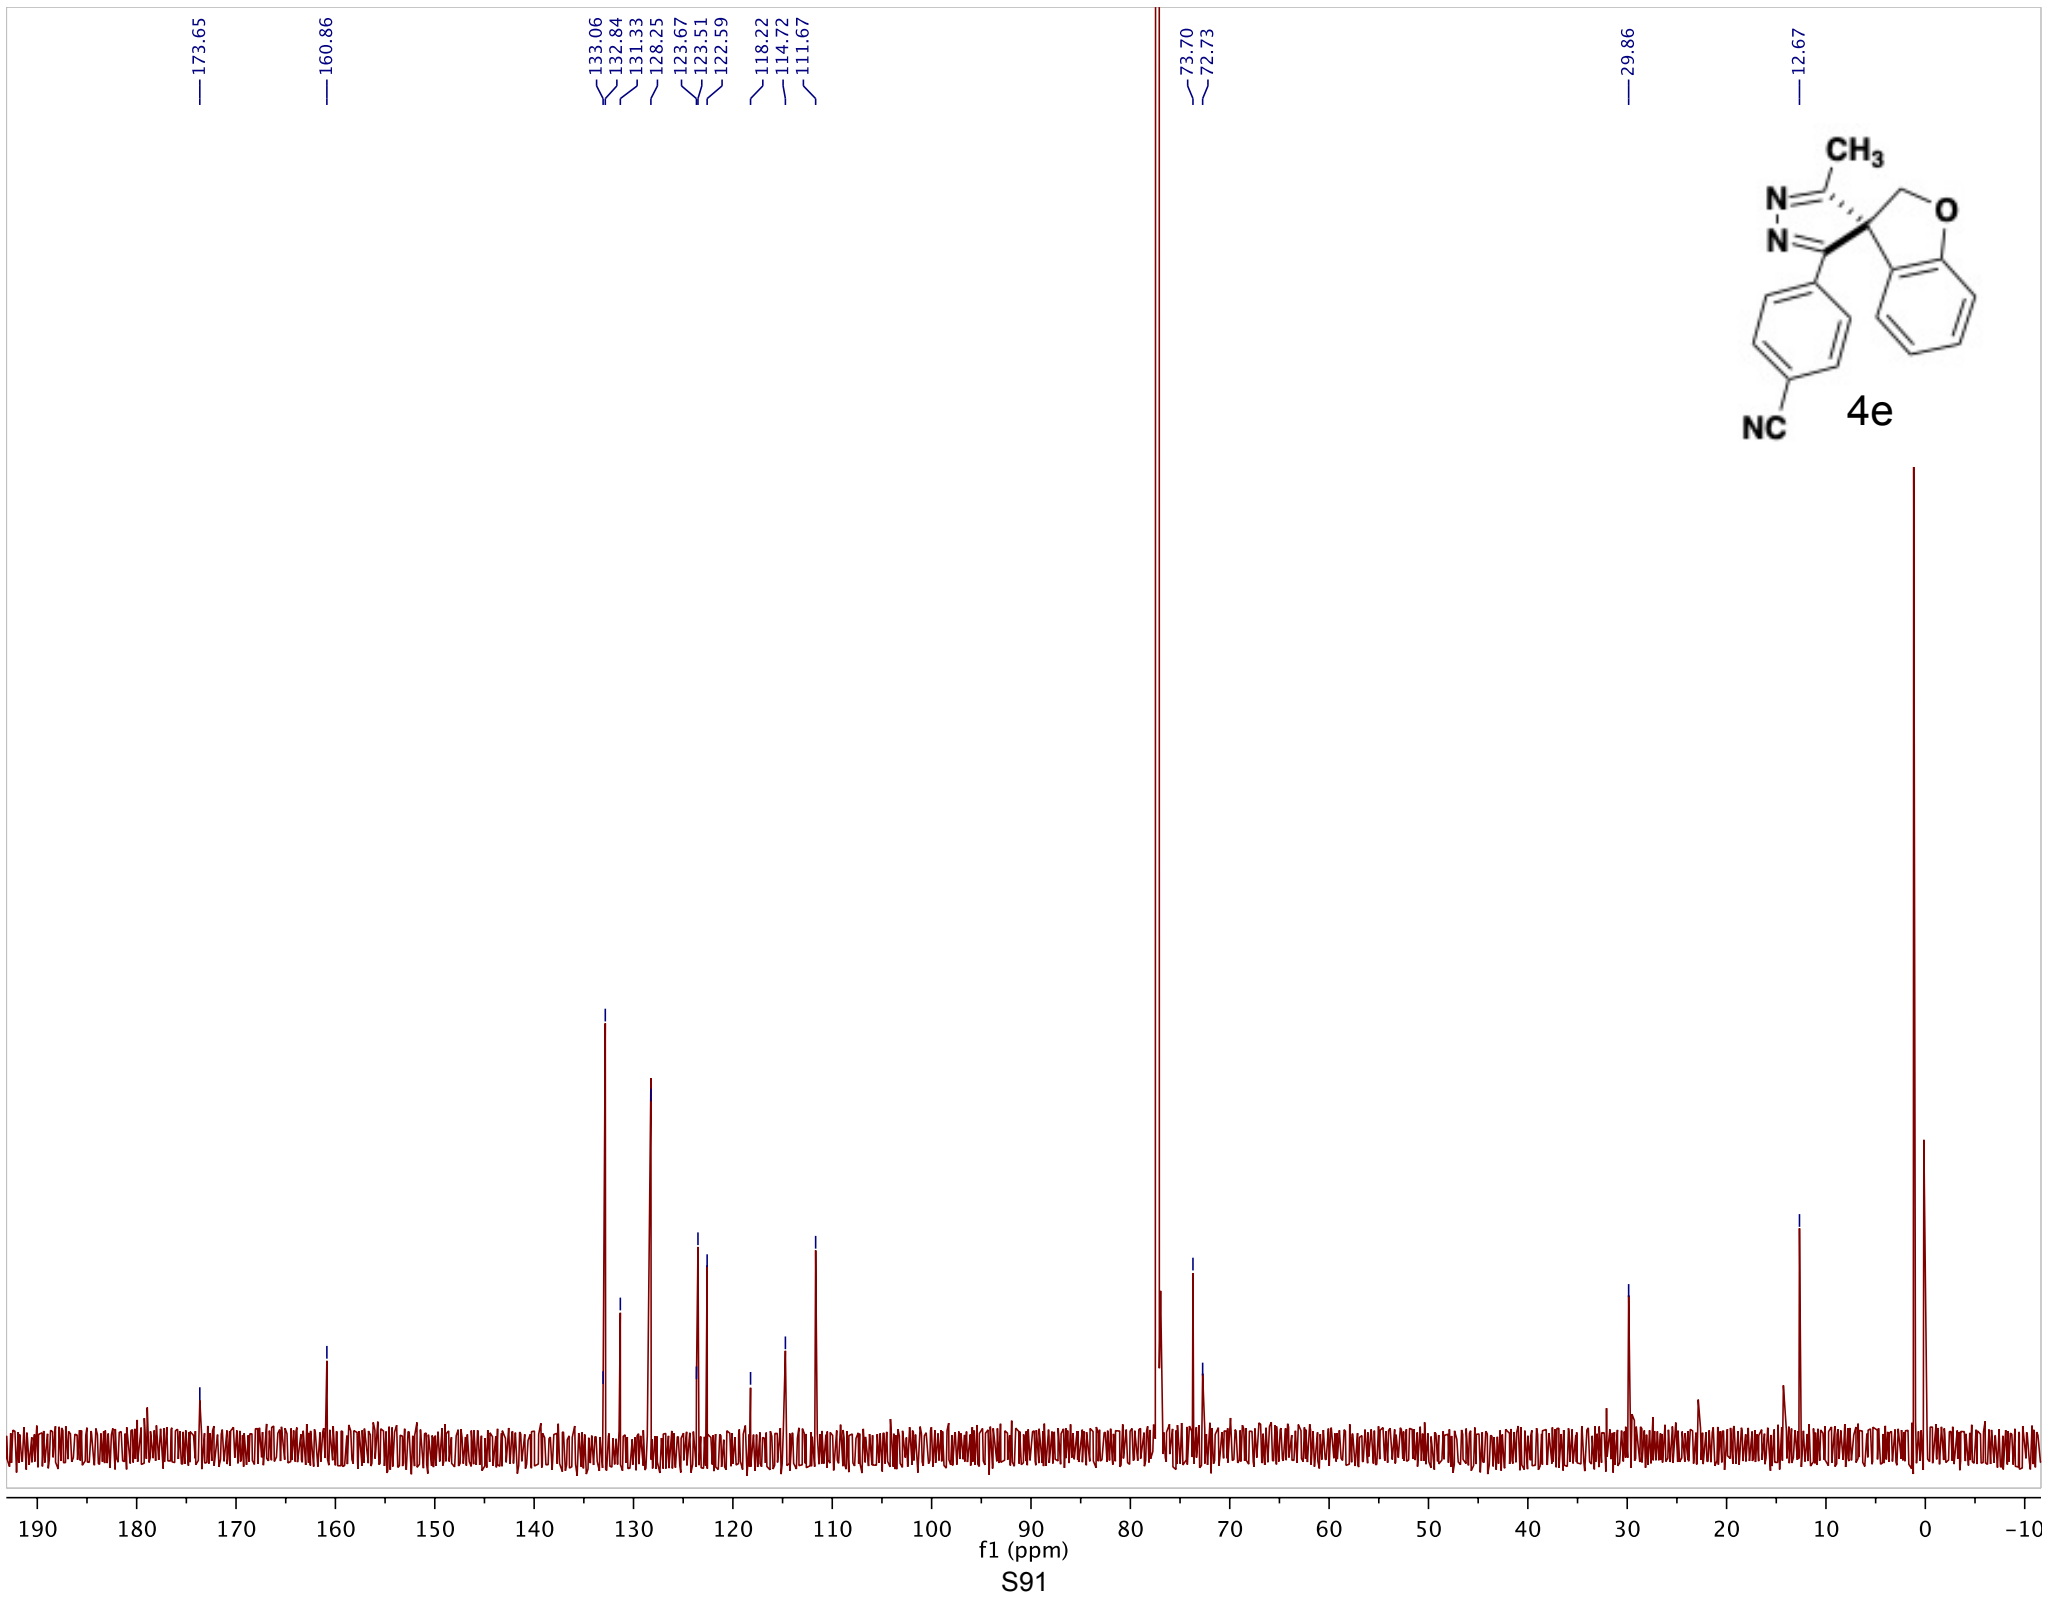

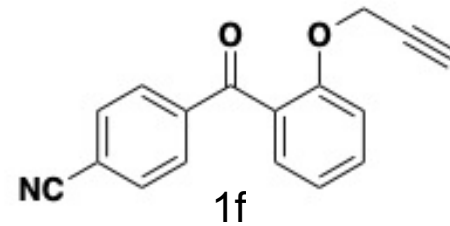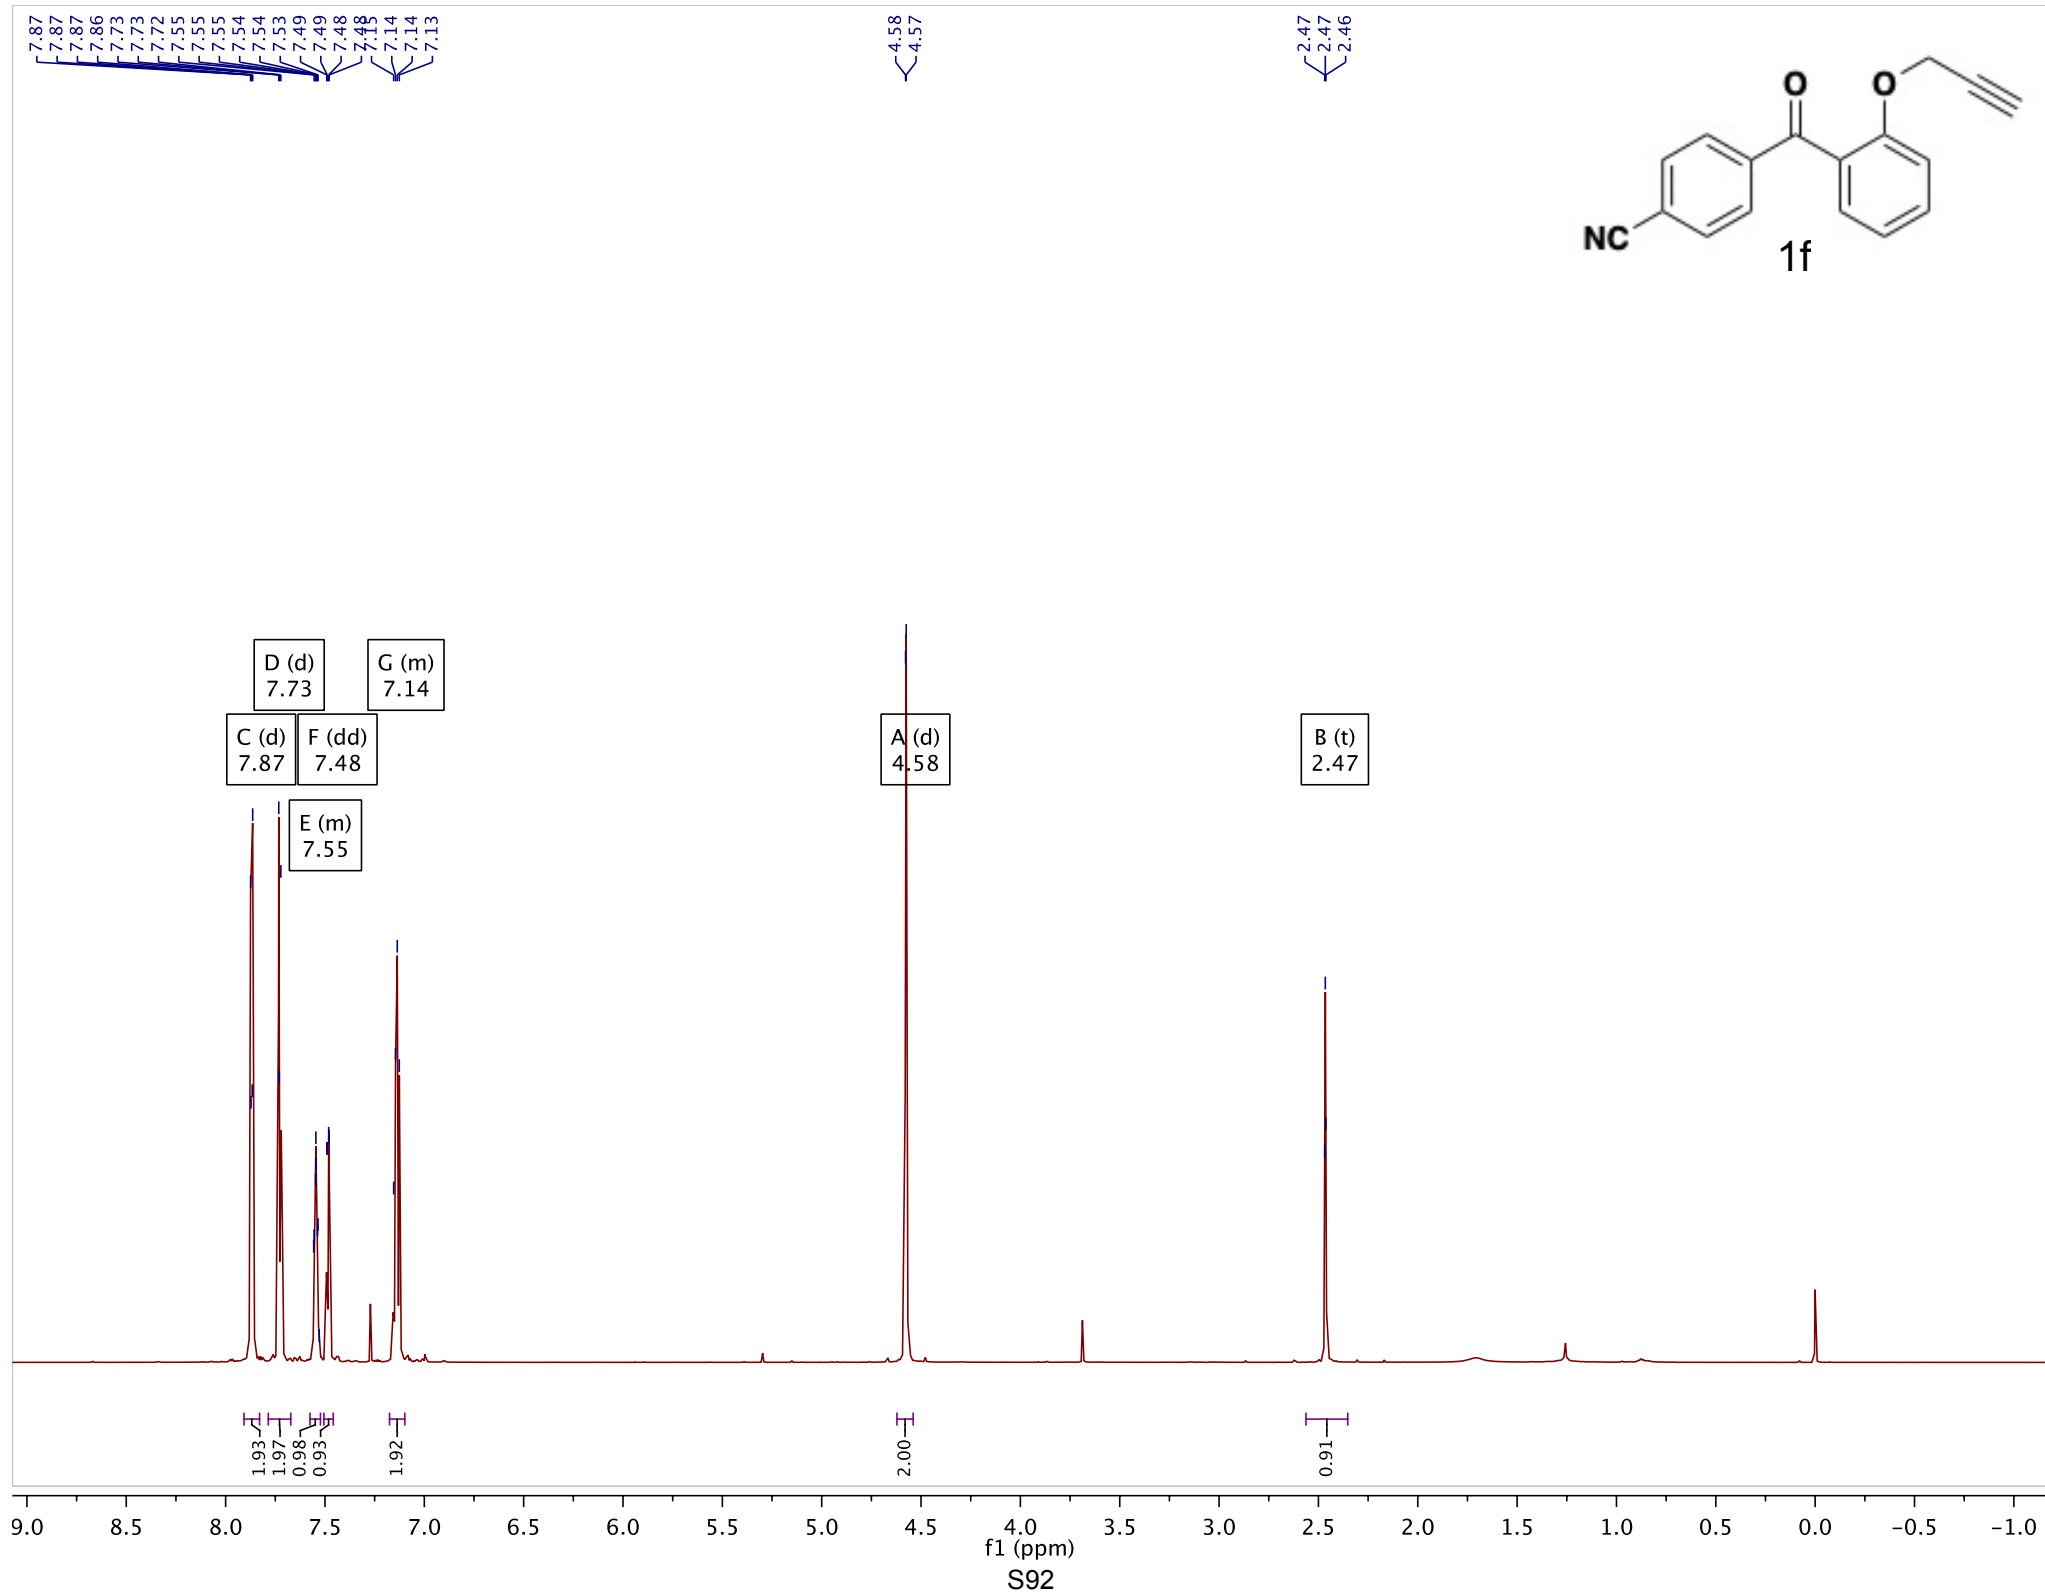

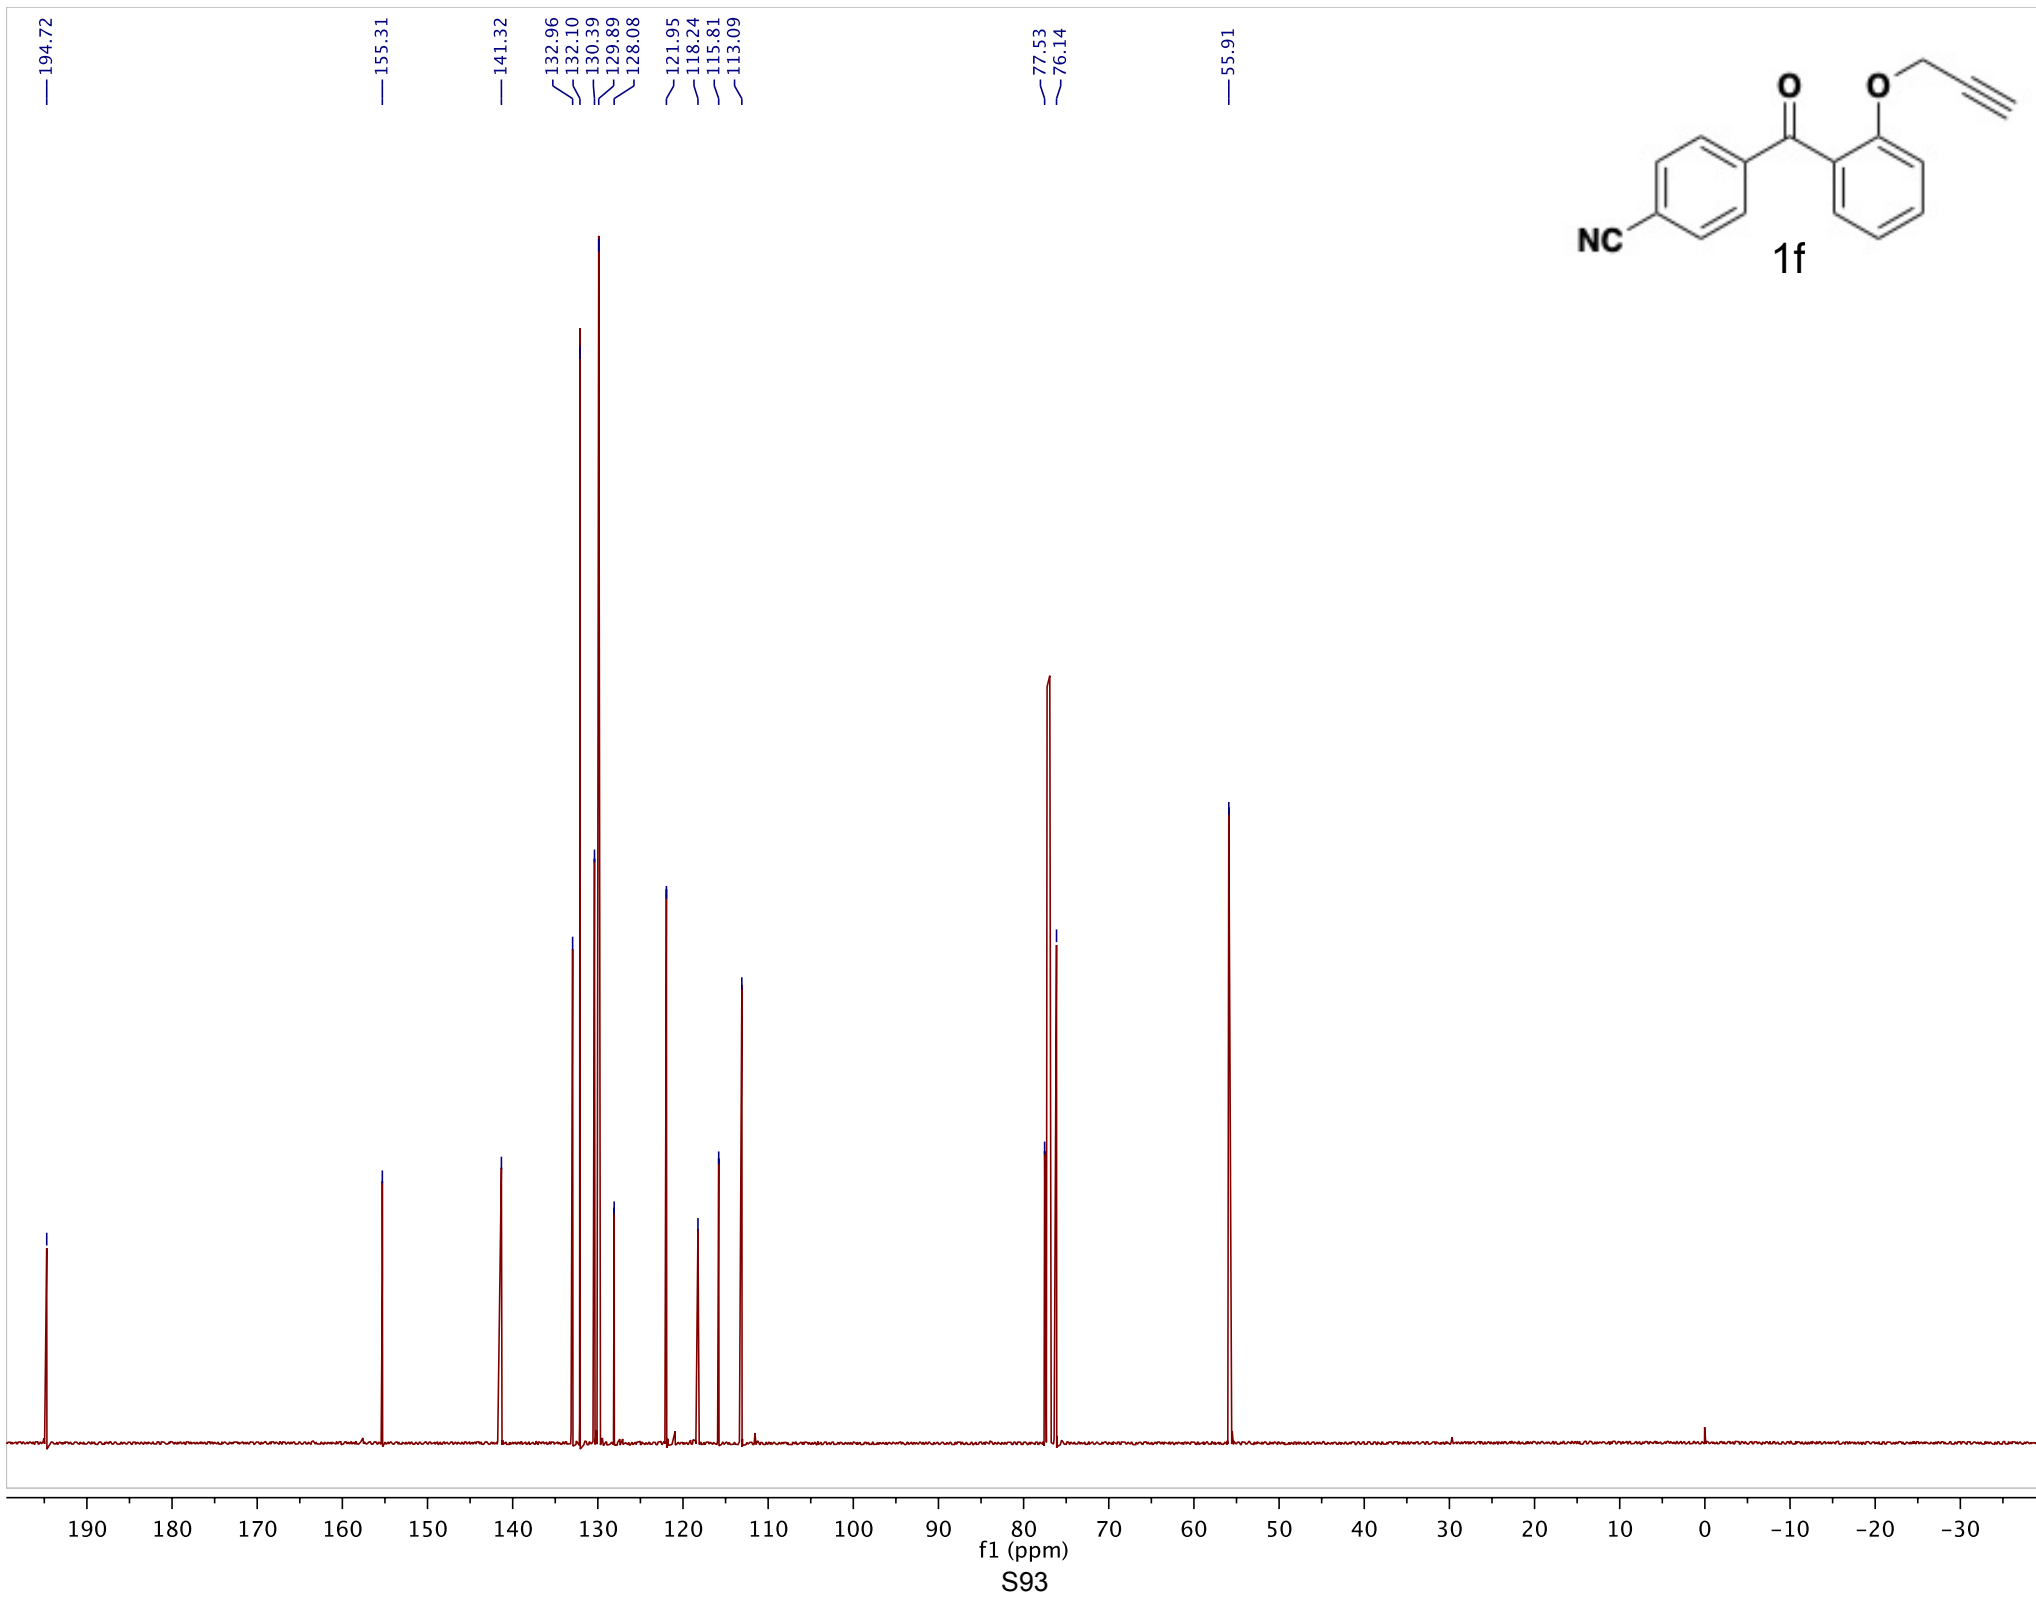

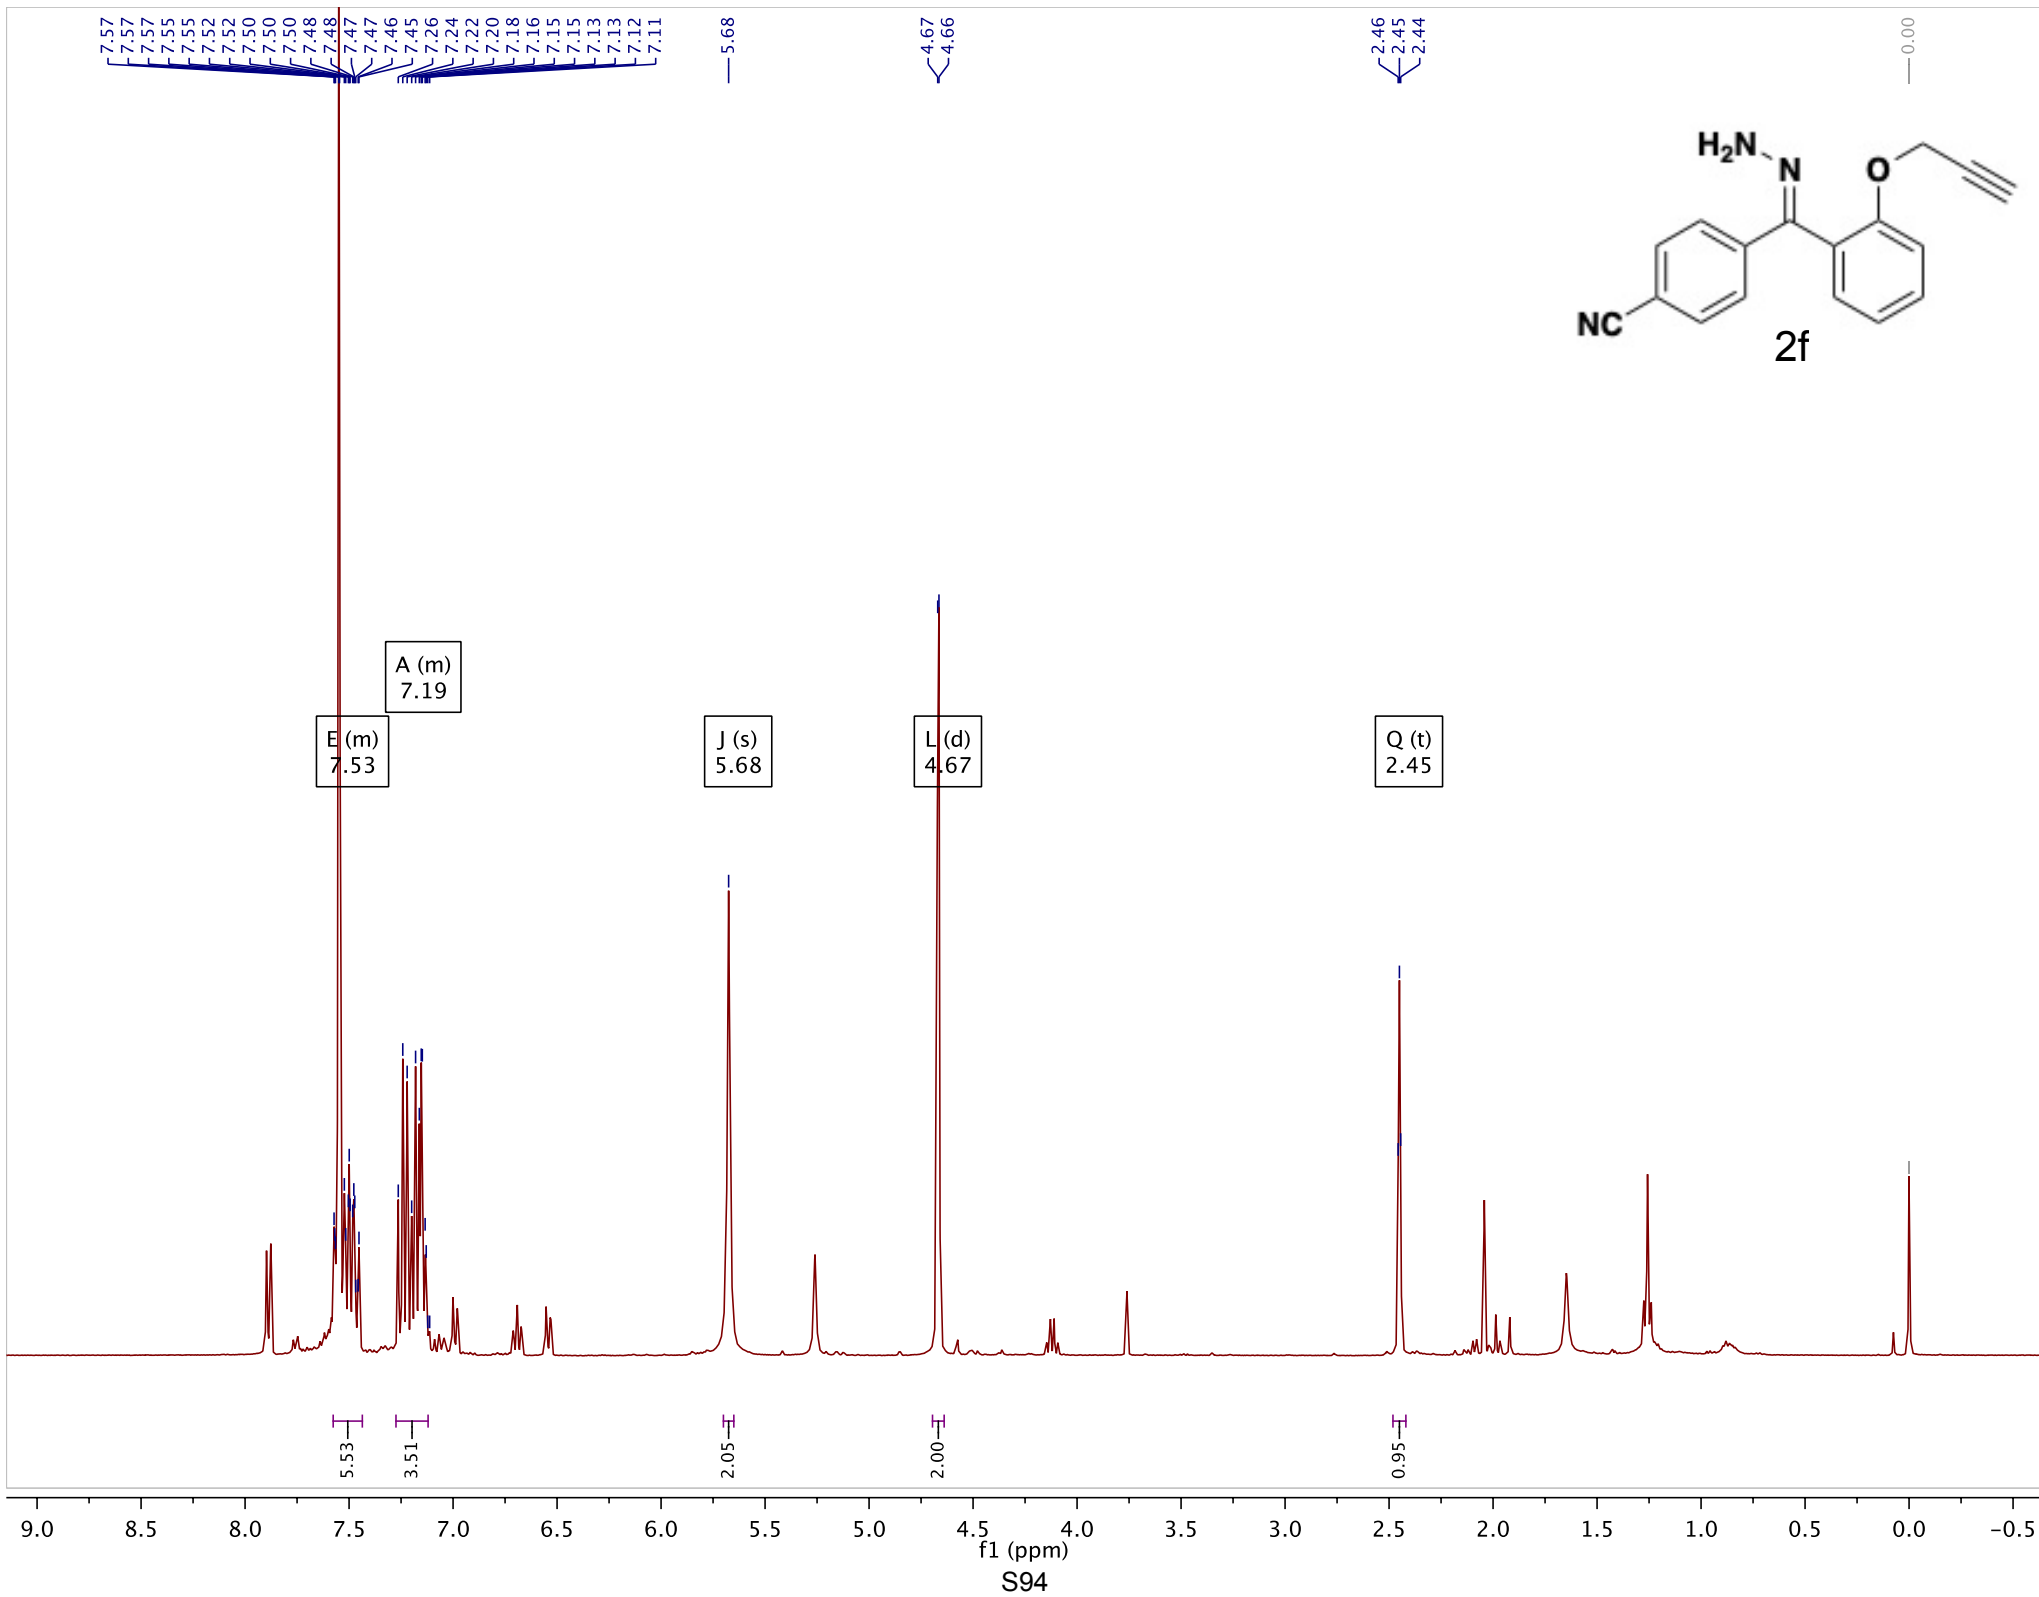

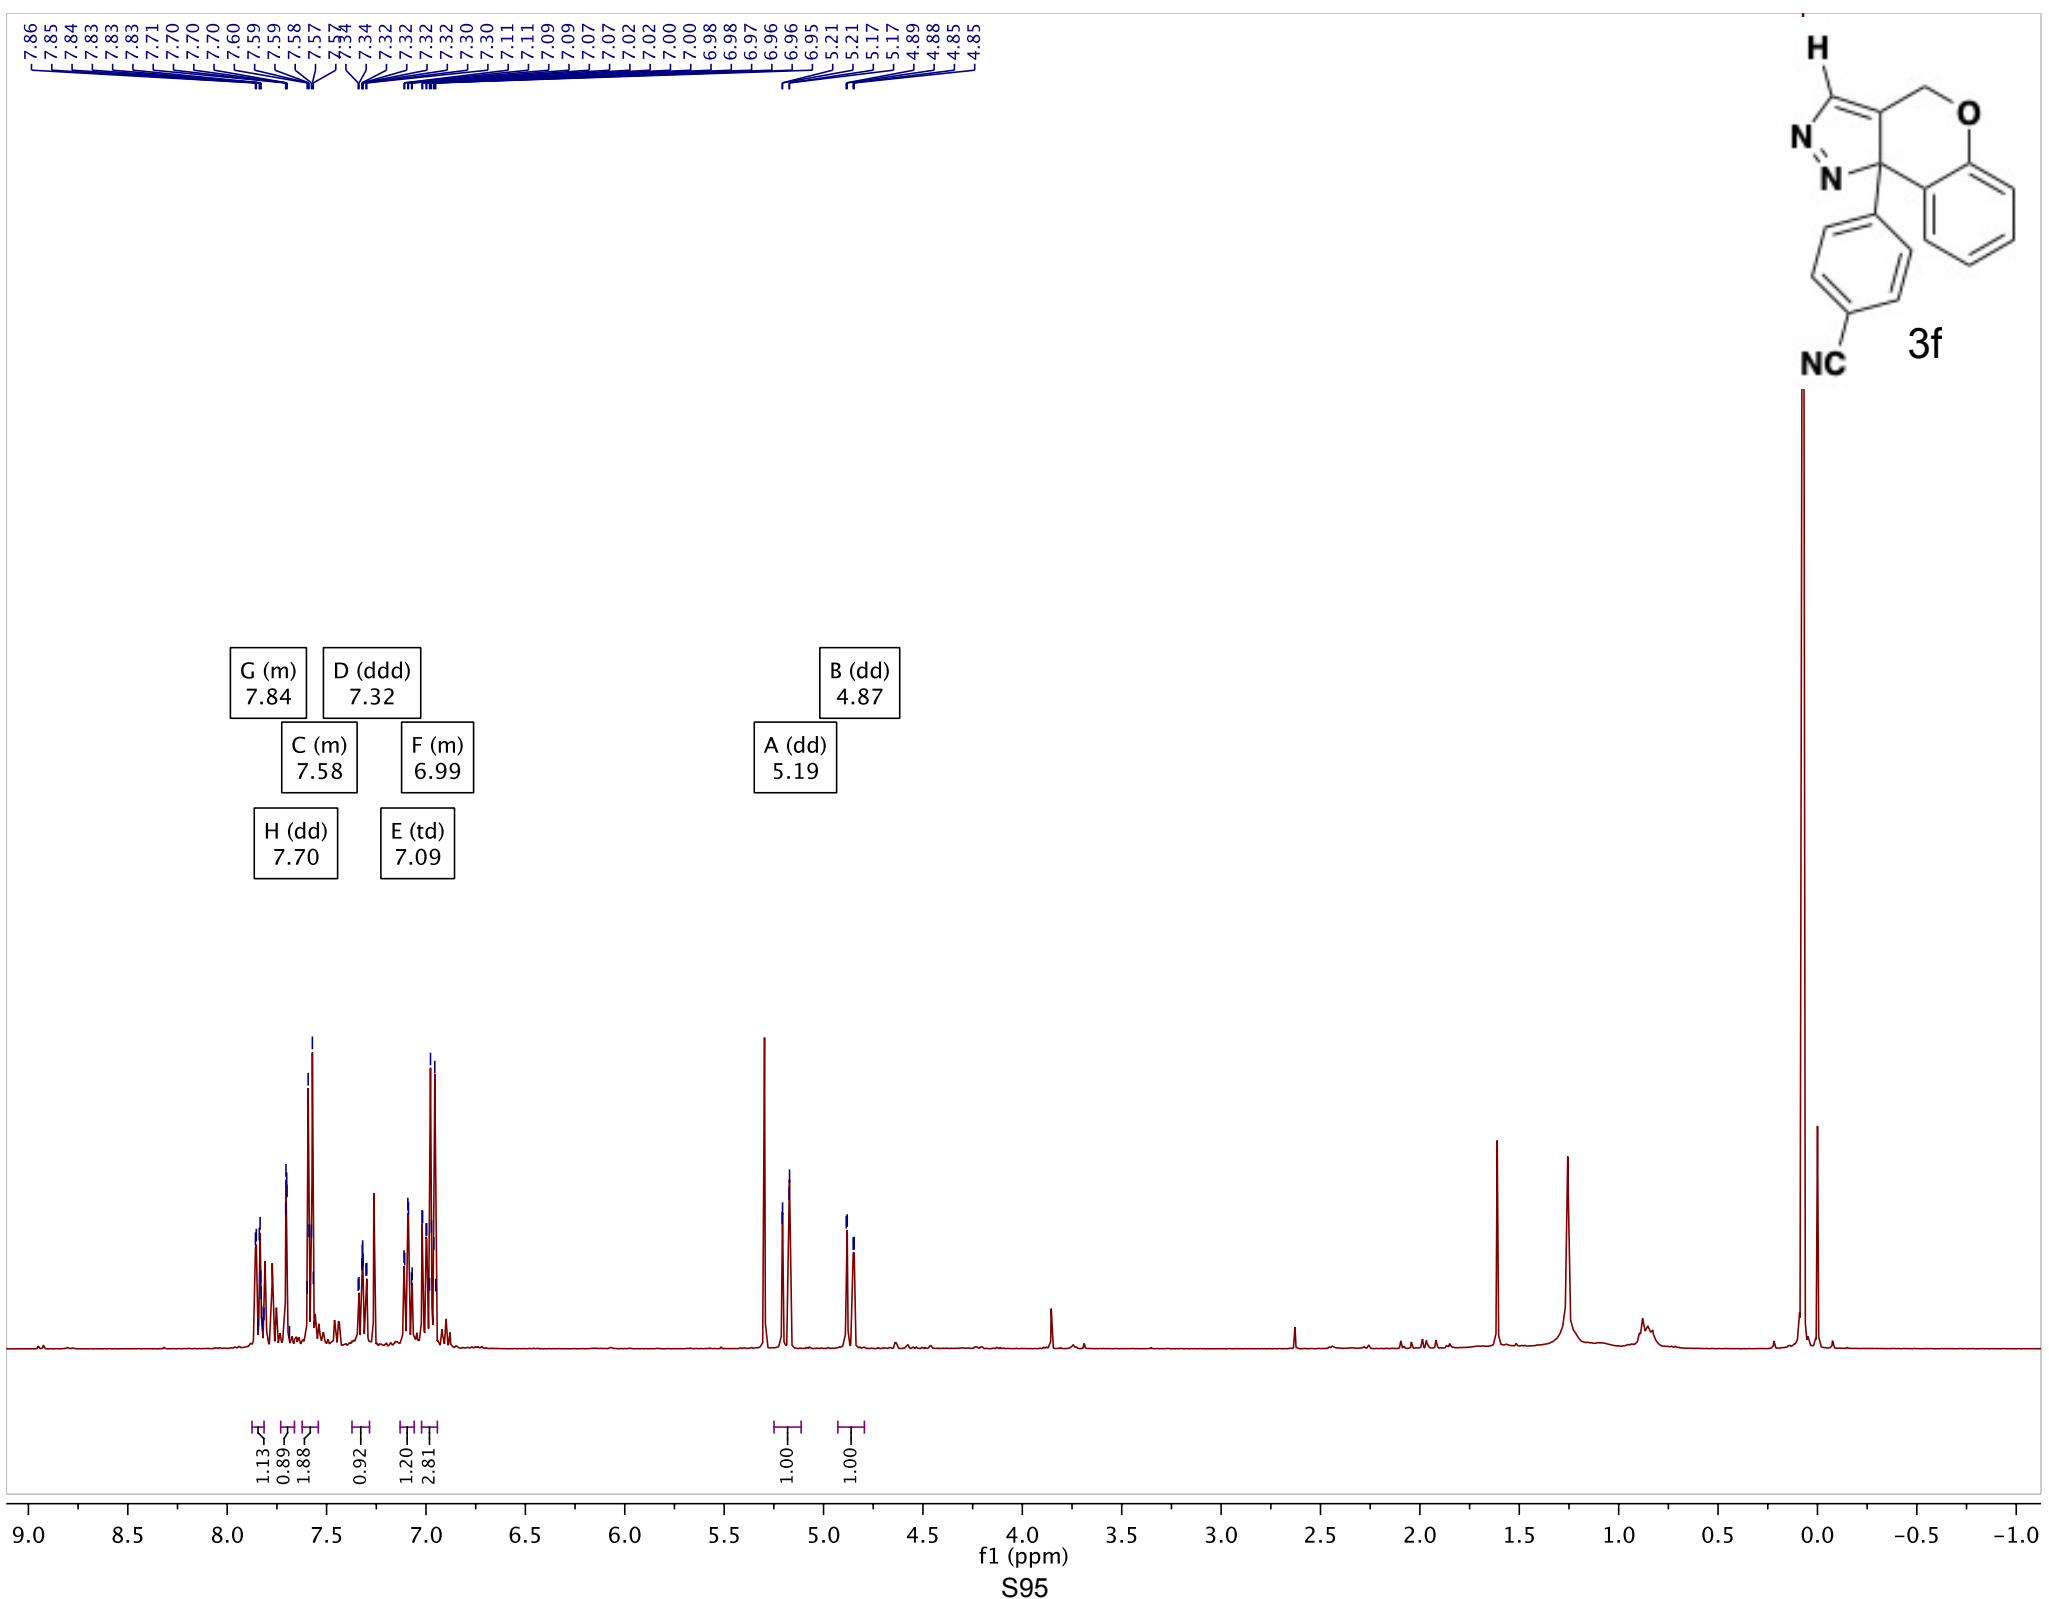

153.46  
152.84

139.32  
138.59

132.89  
130.45  
129.64  
127.11

122.06  
119.92  
118.14  
117.21  
112.82

97.23

61.41

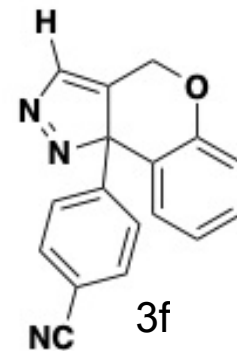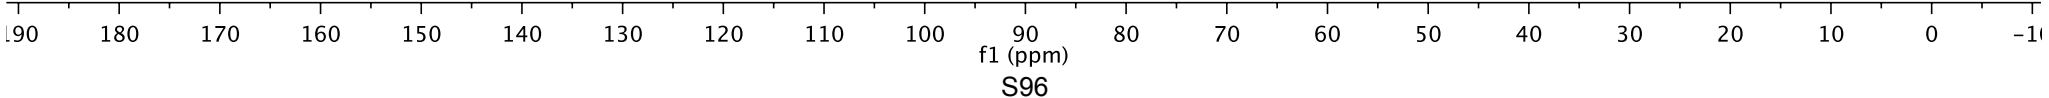



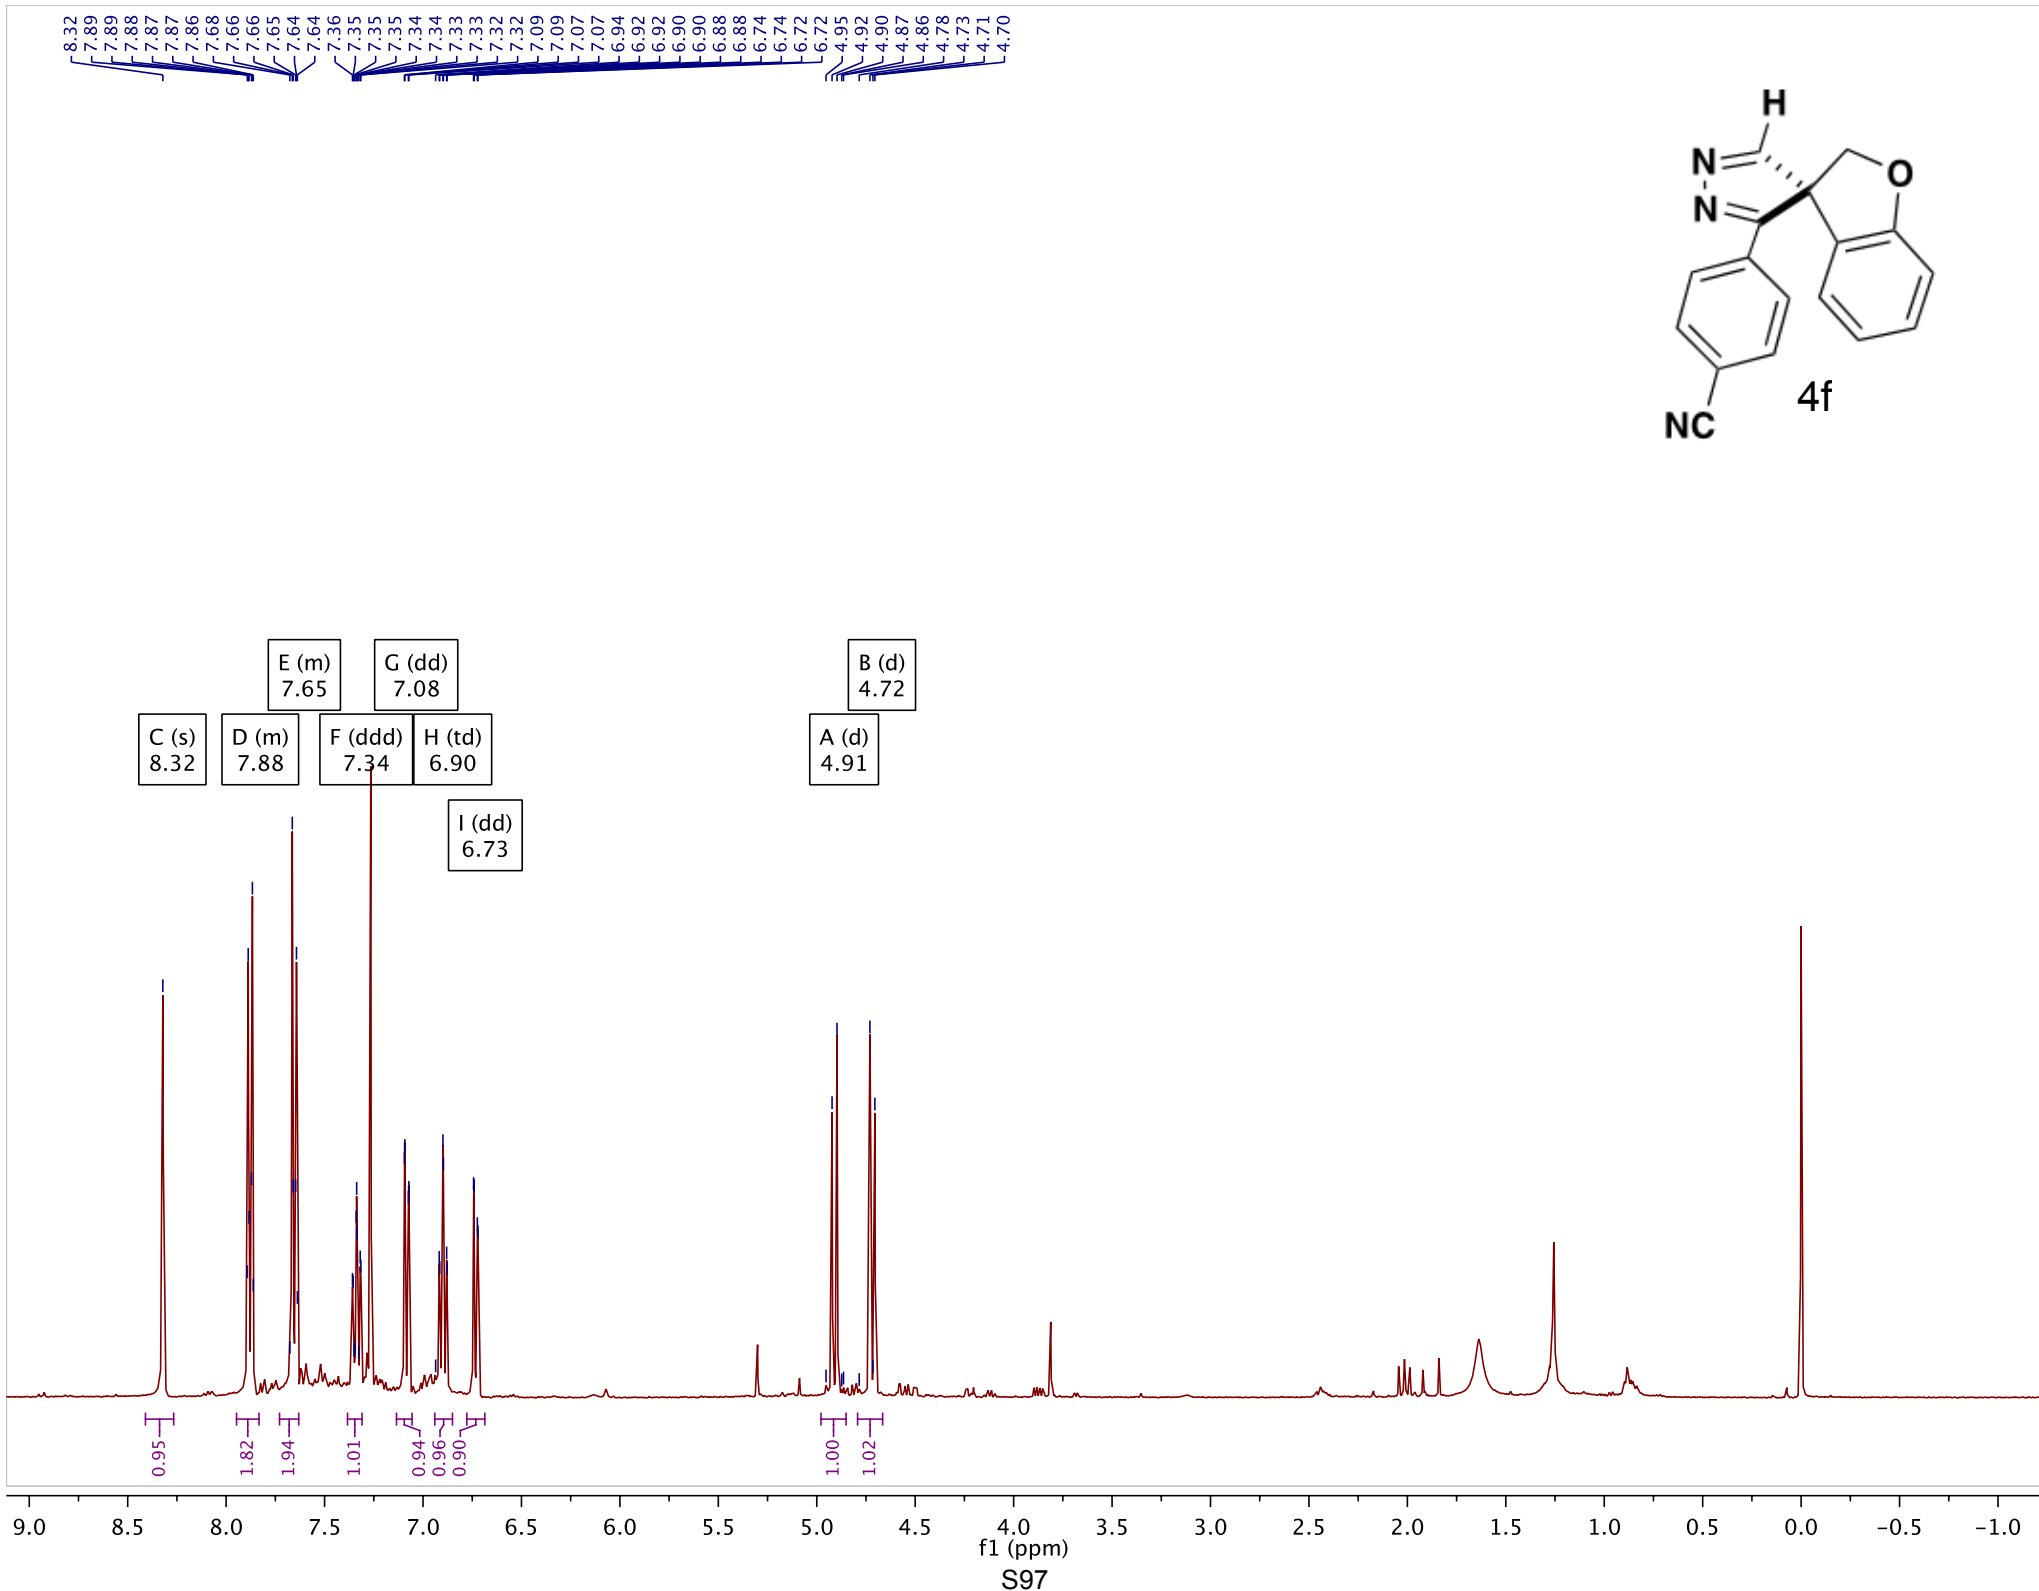

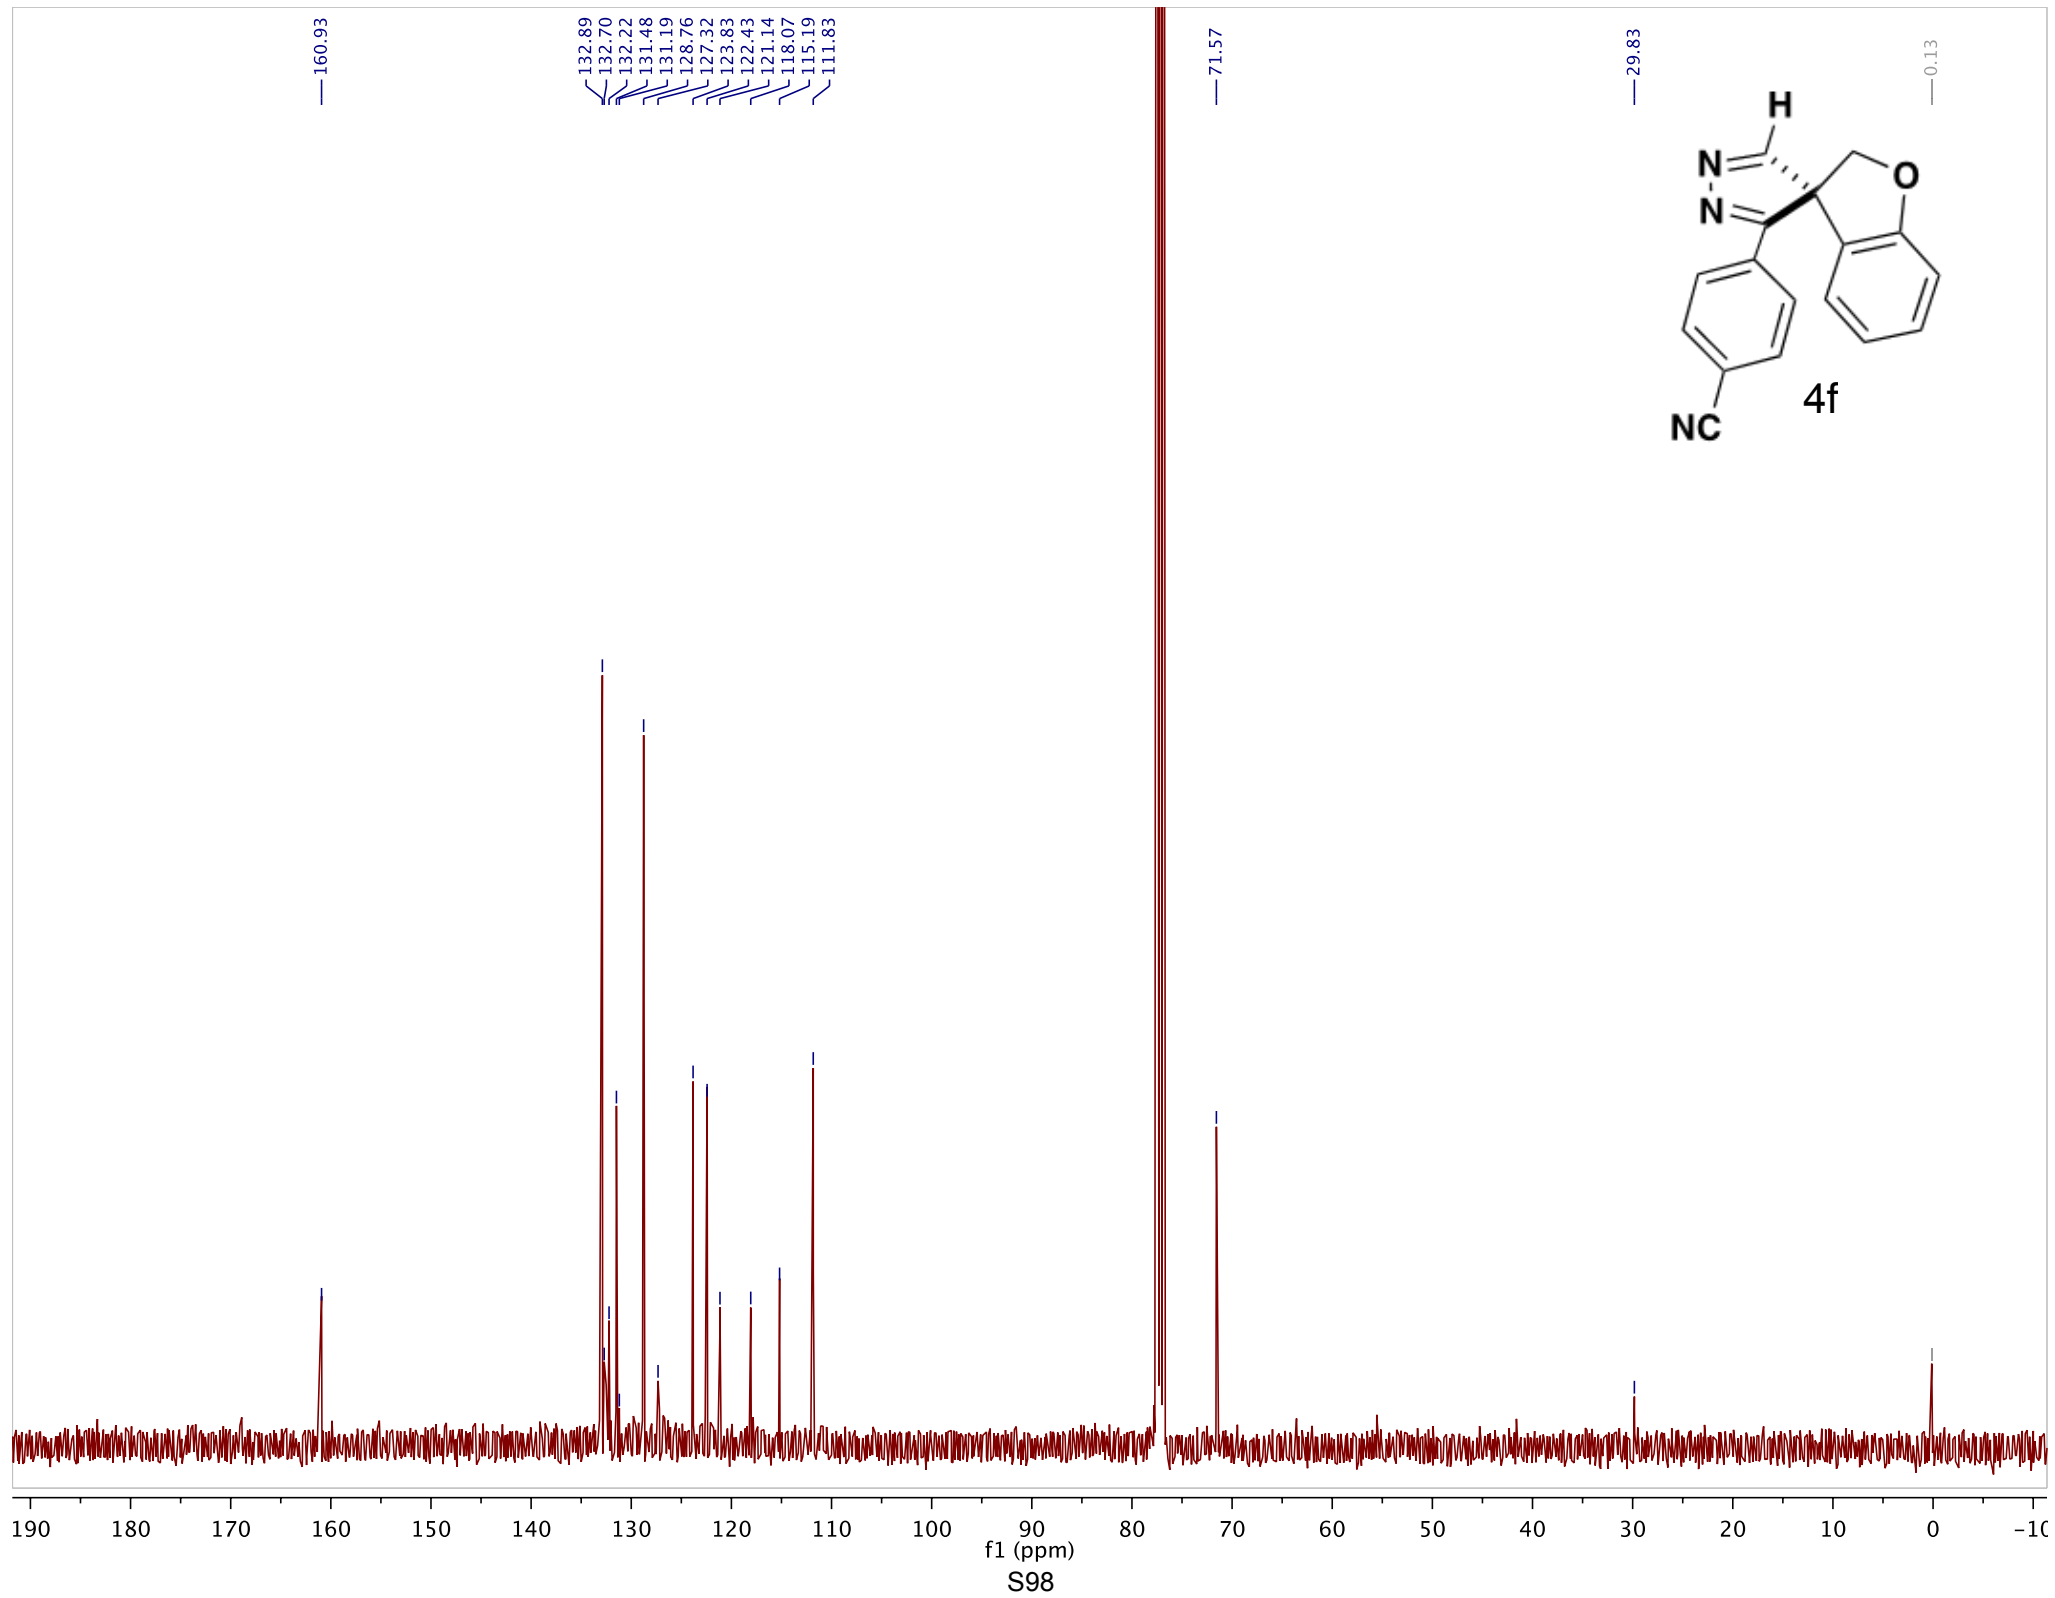

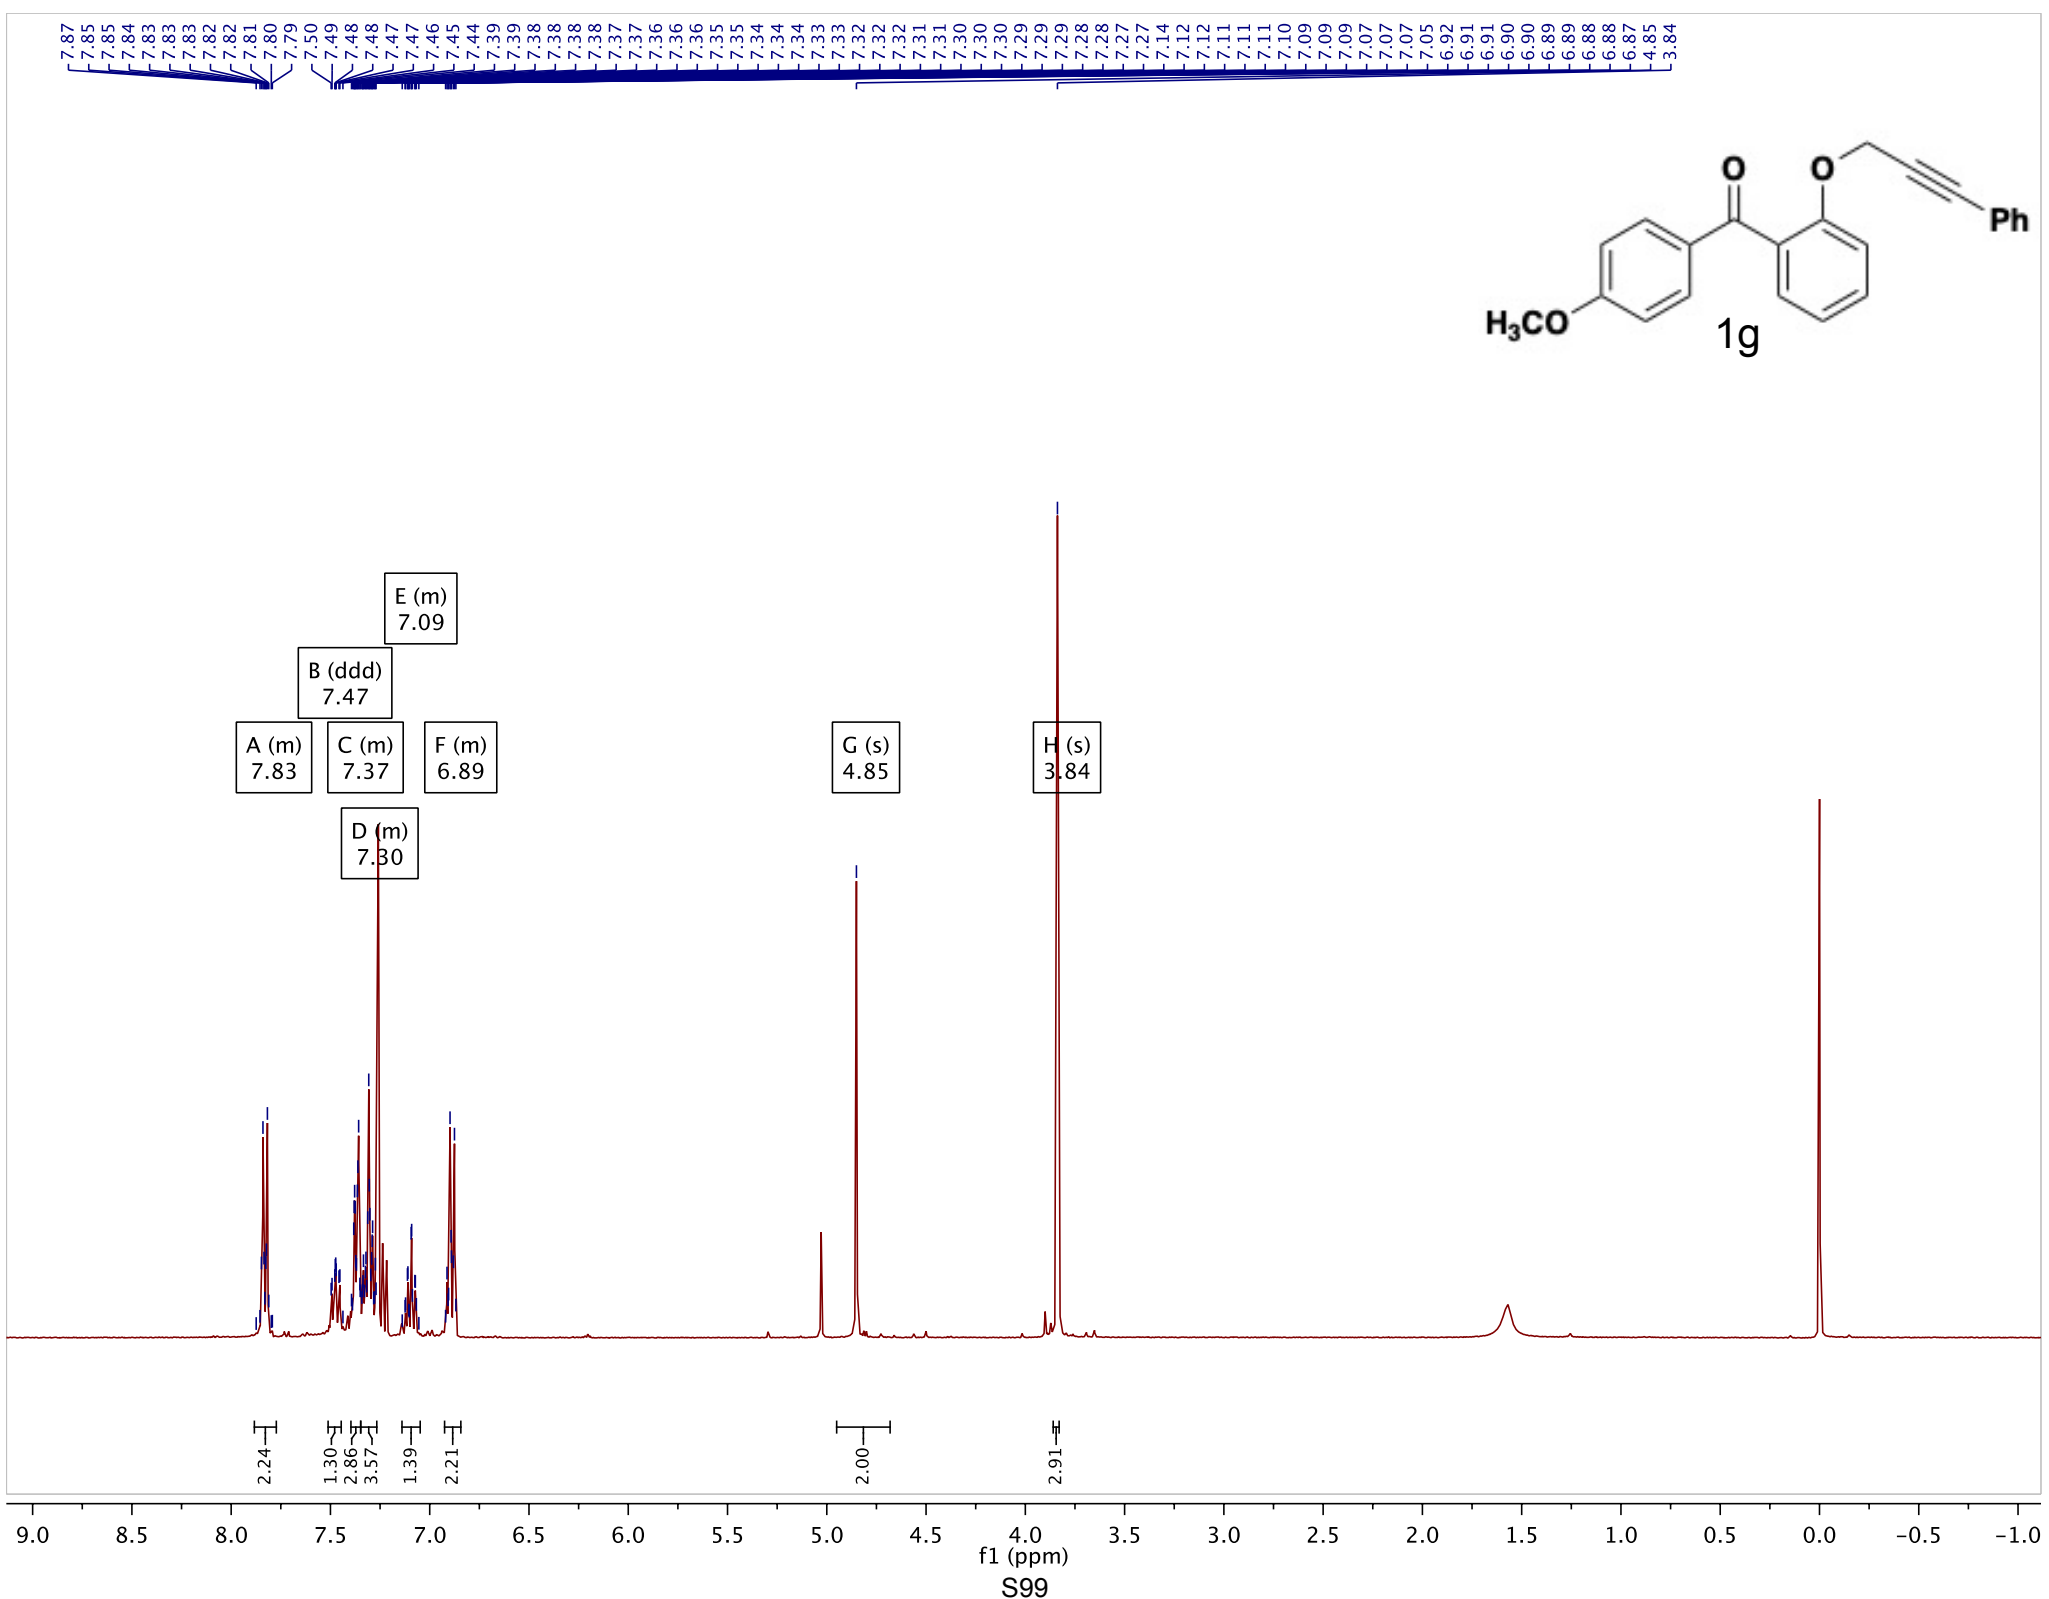

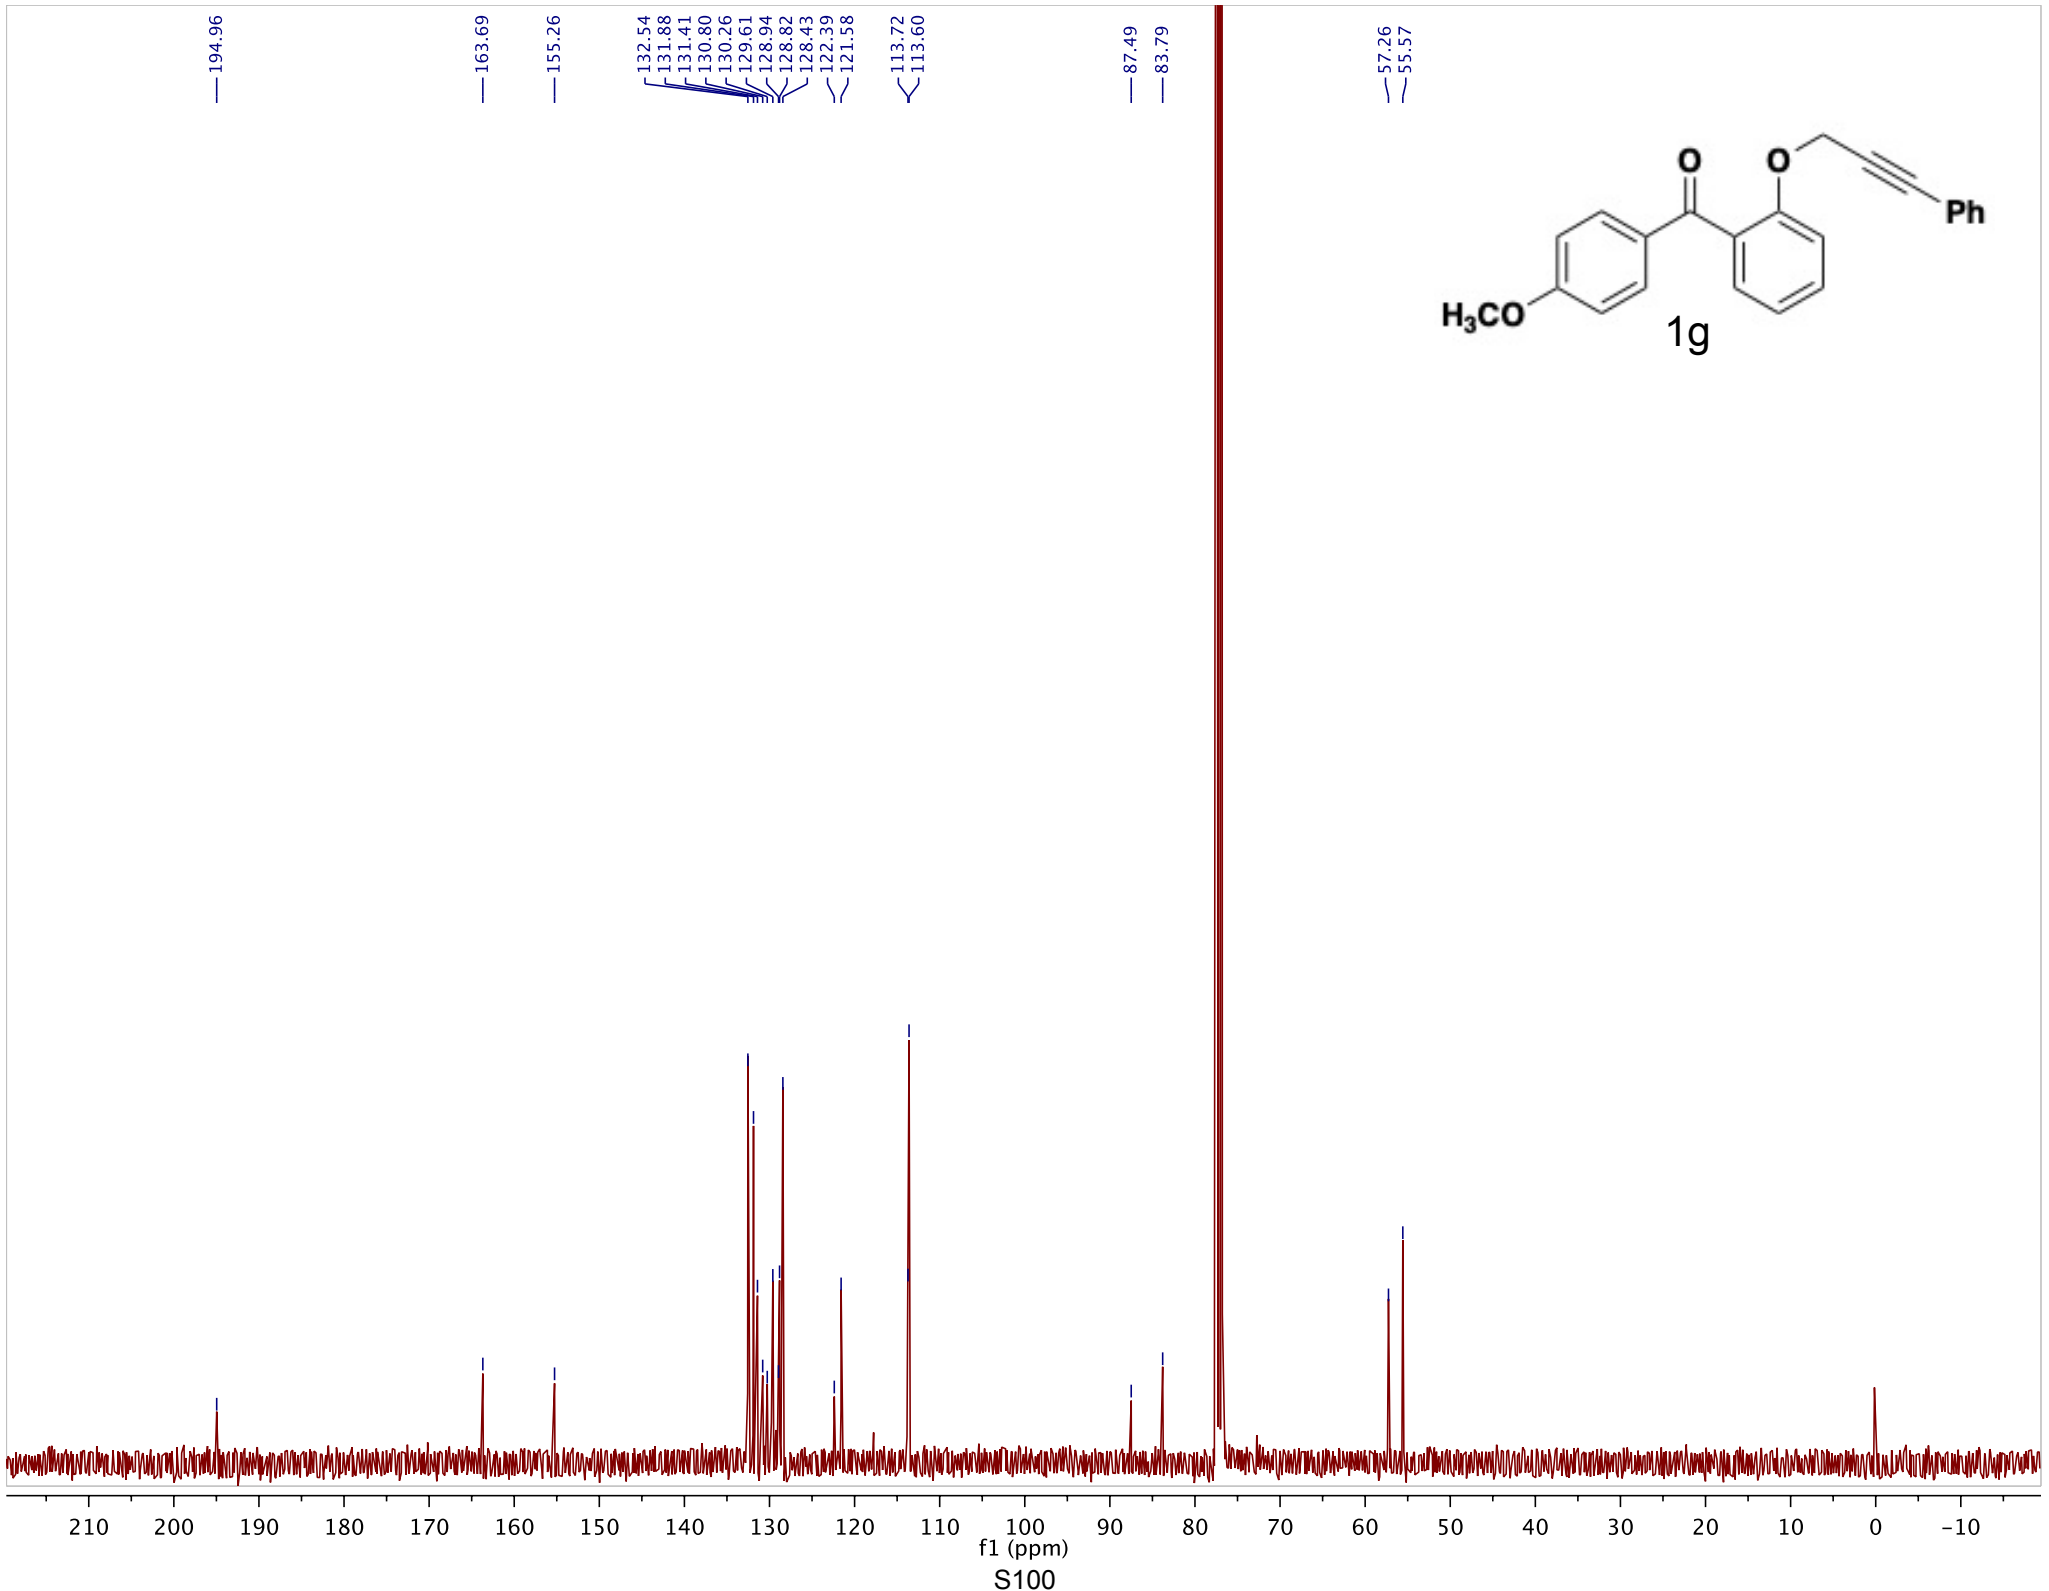

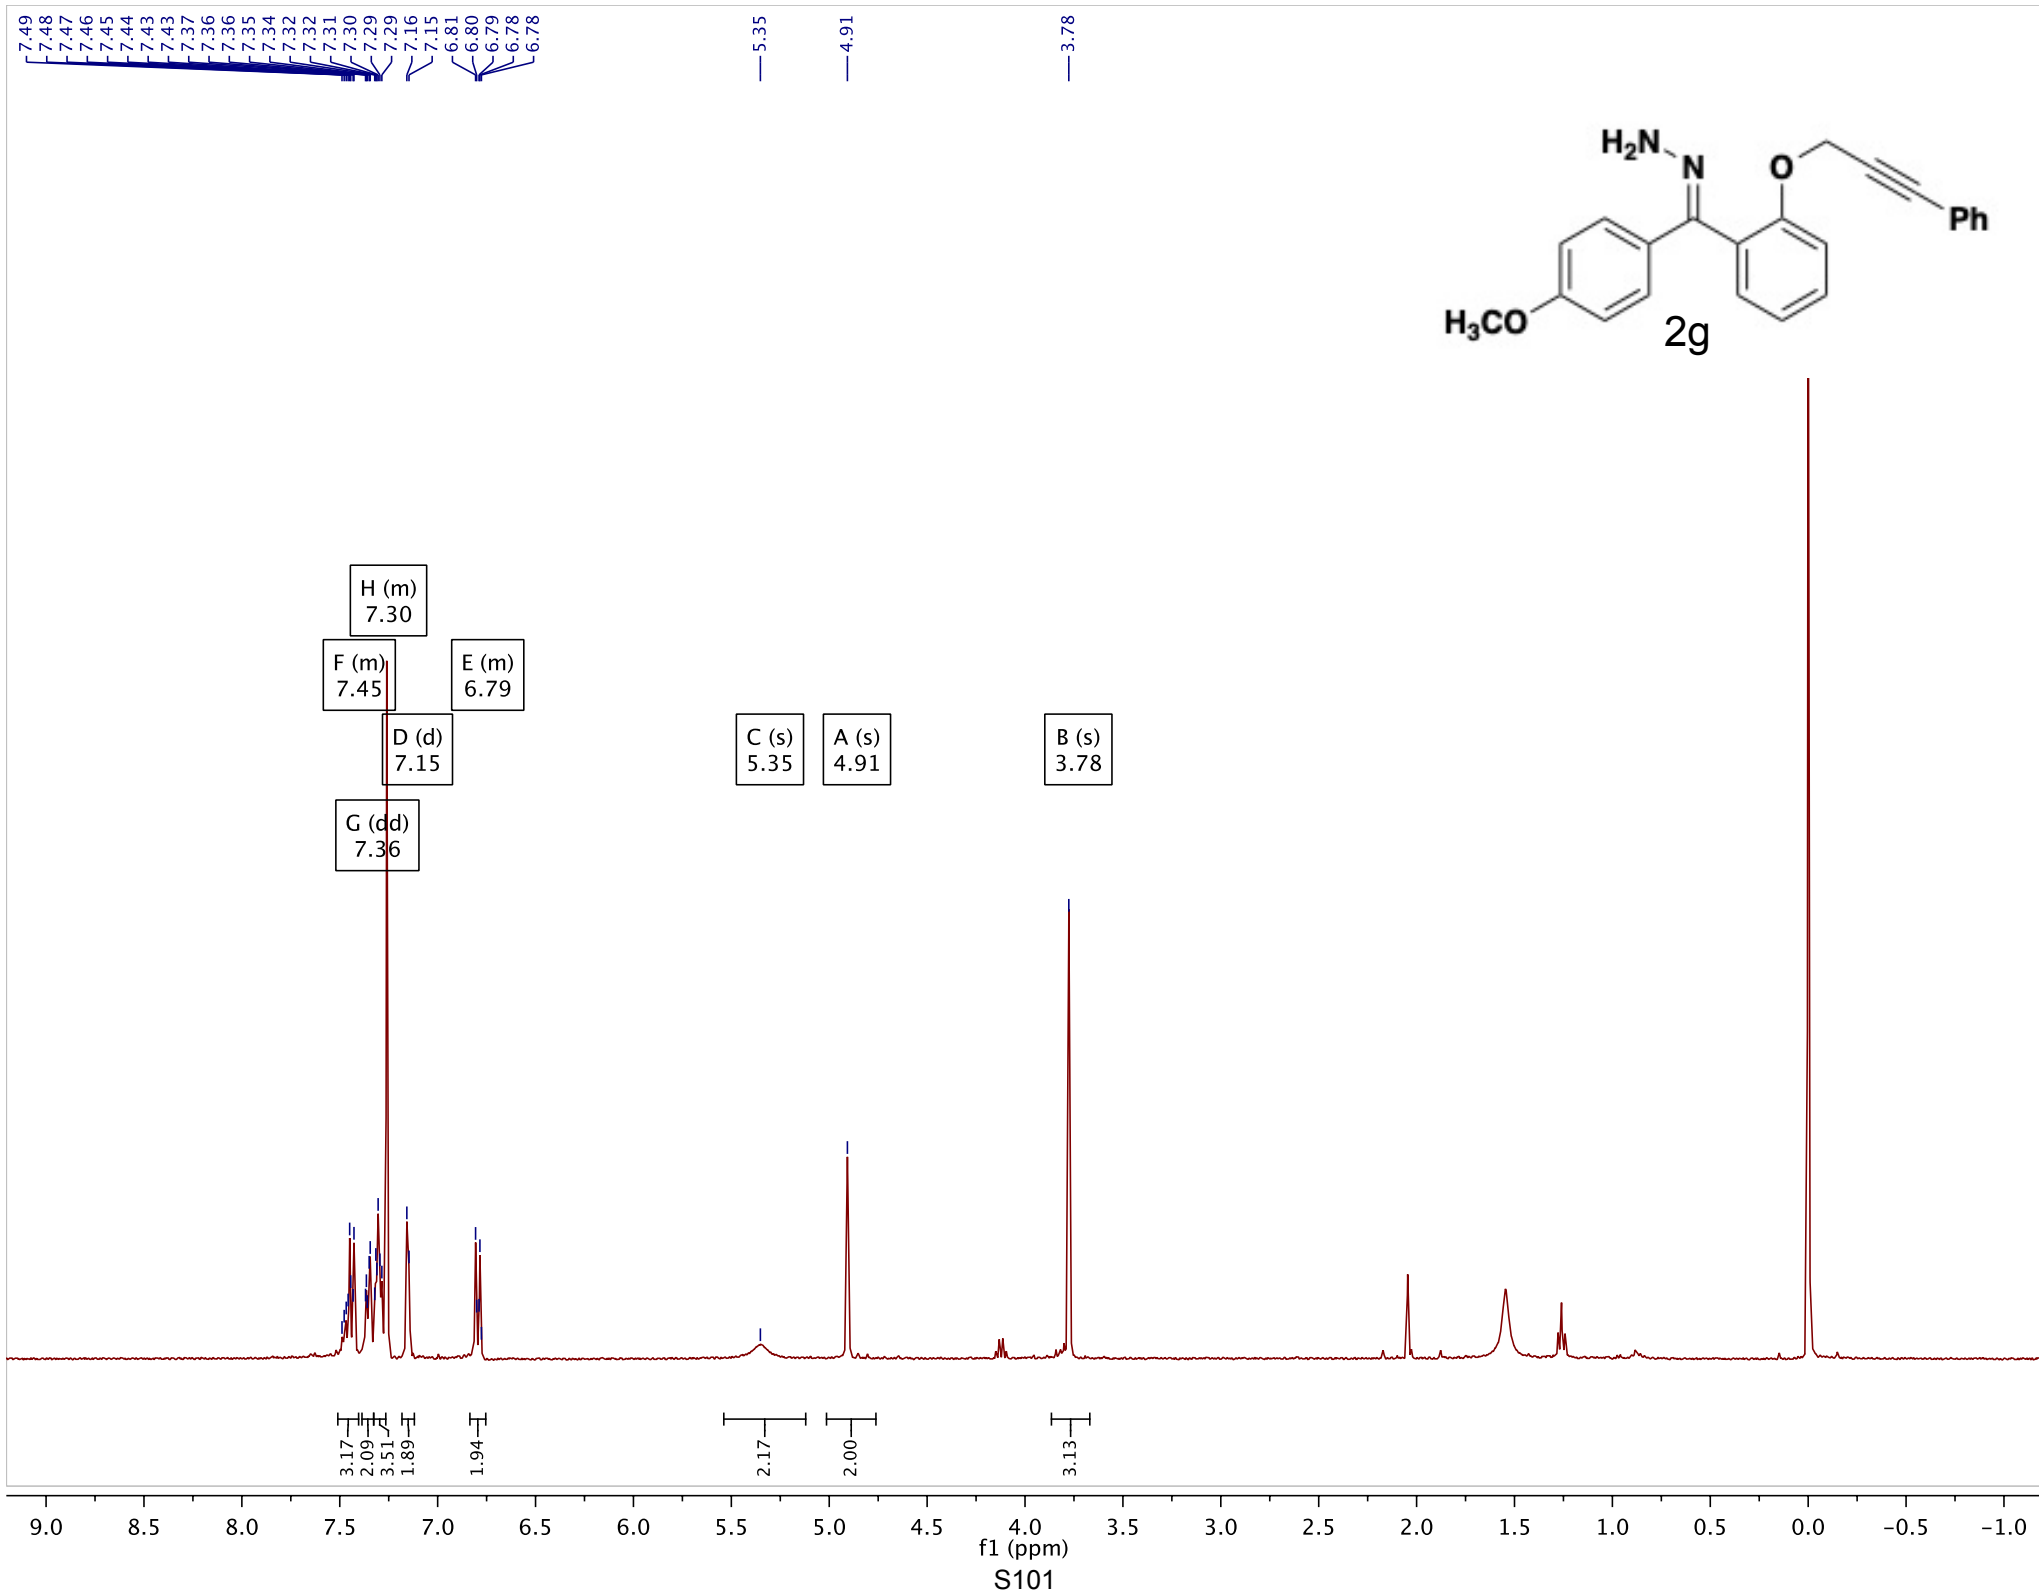

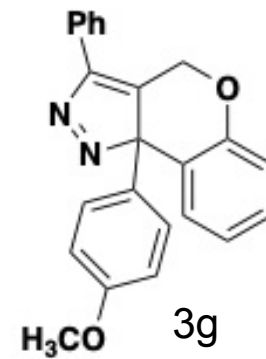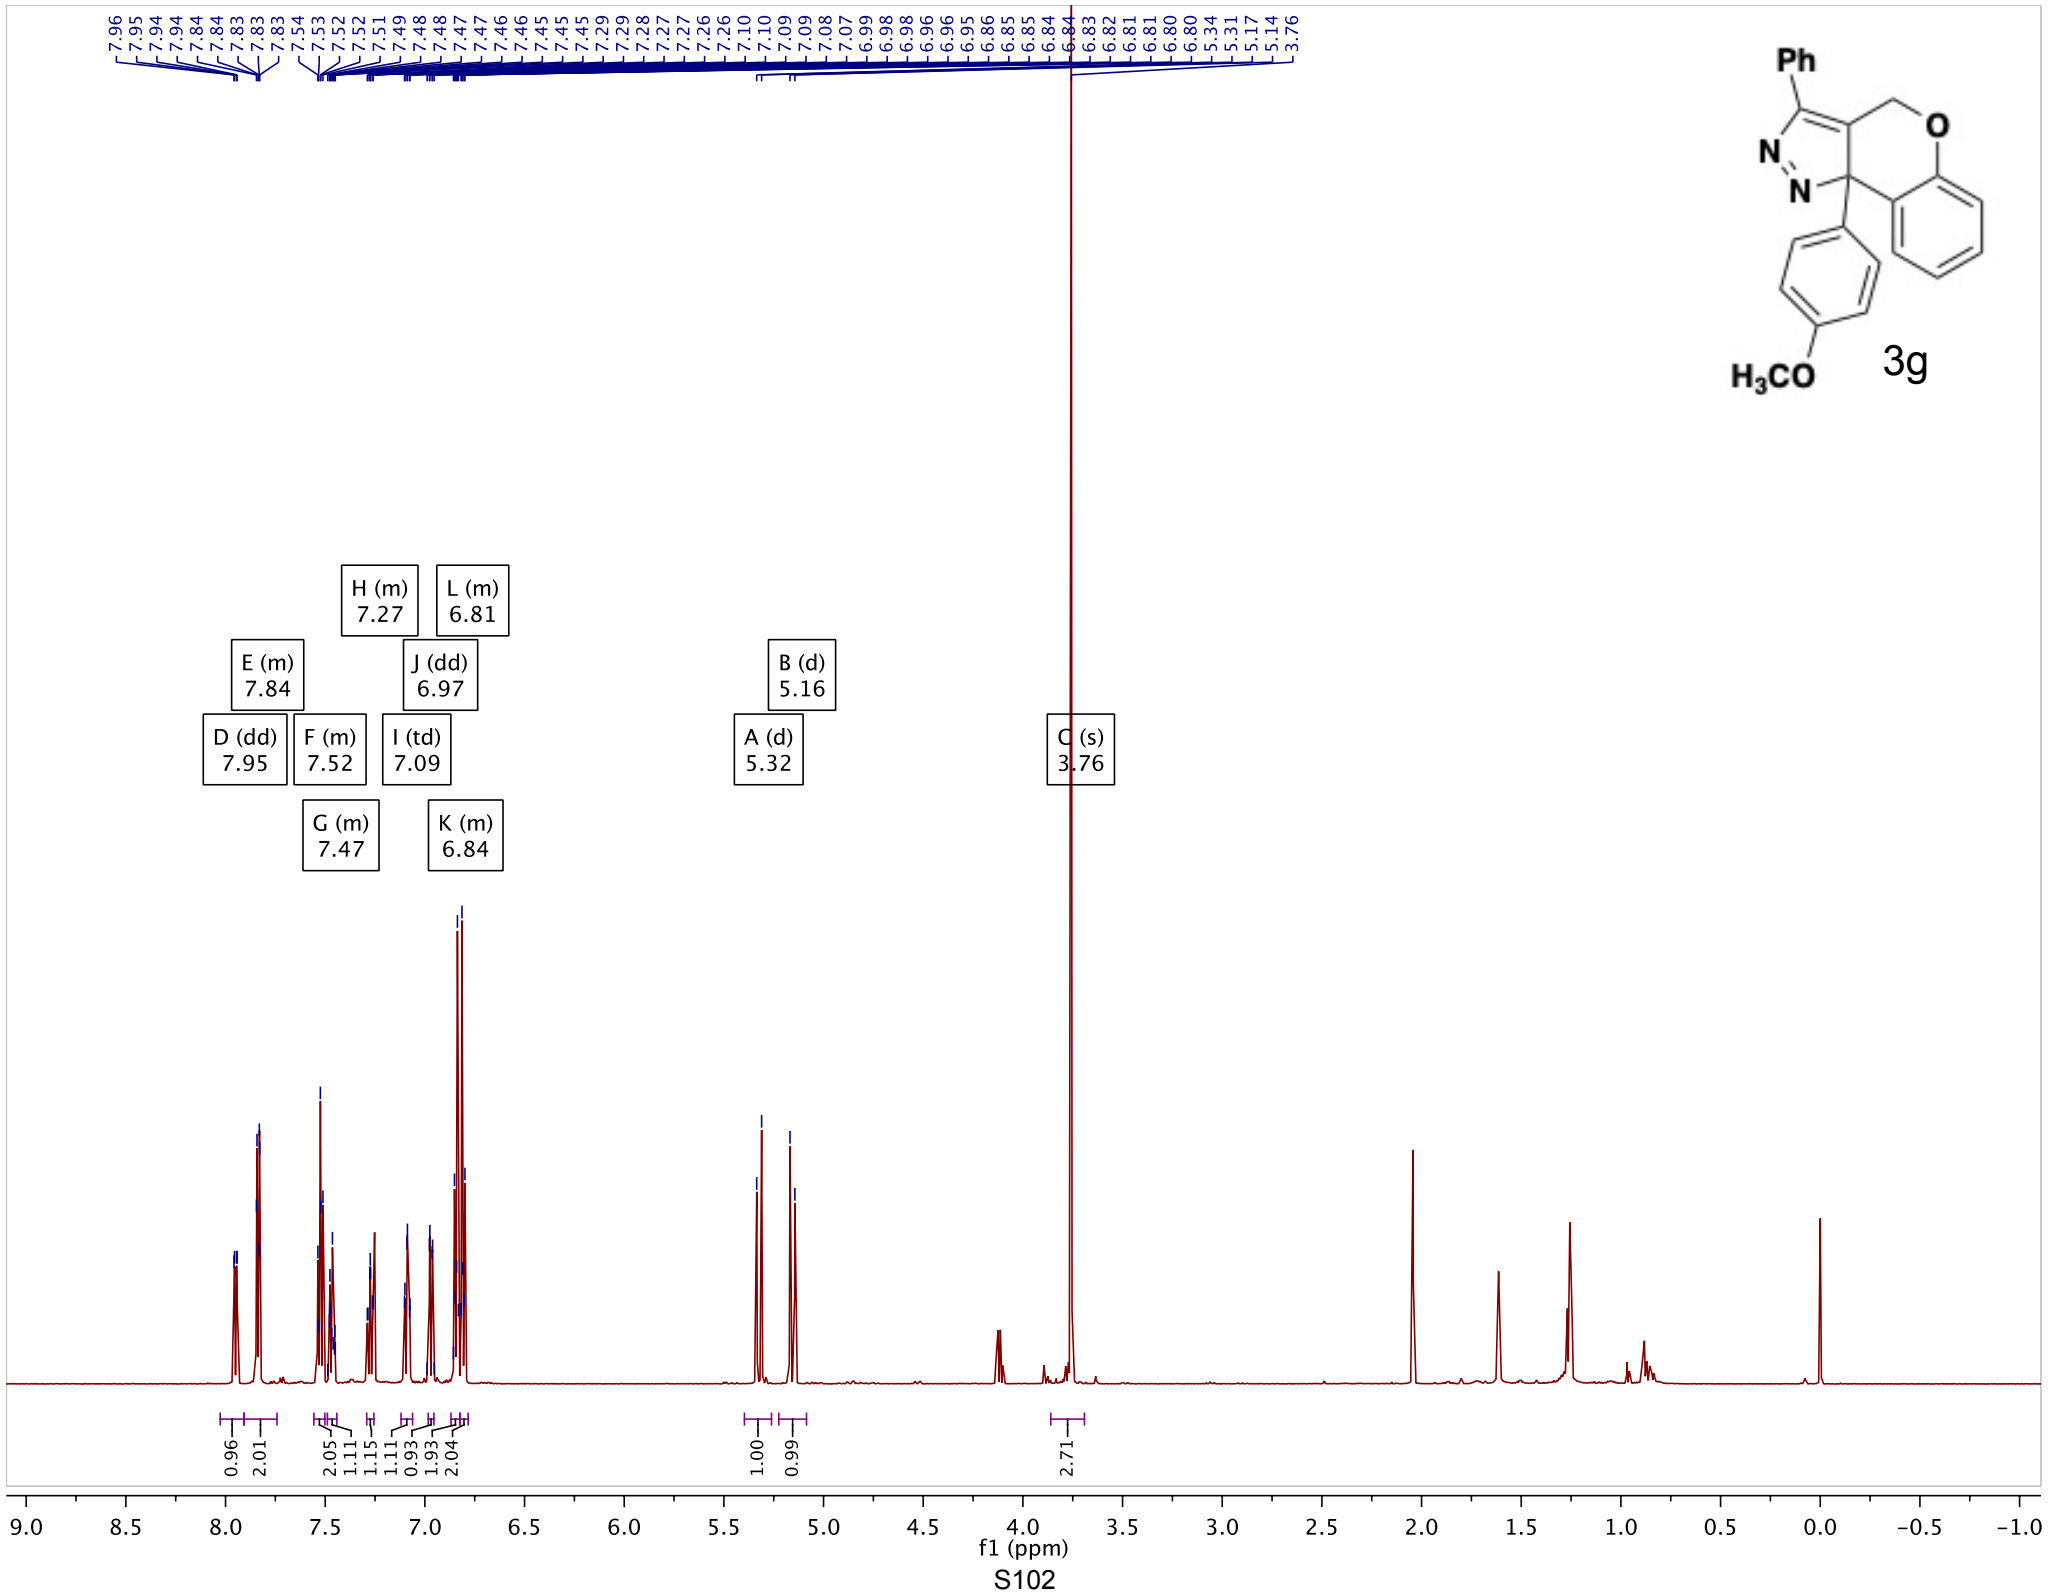

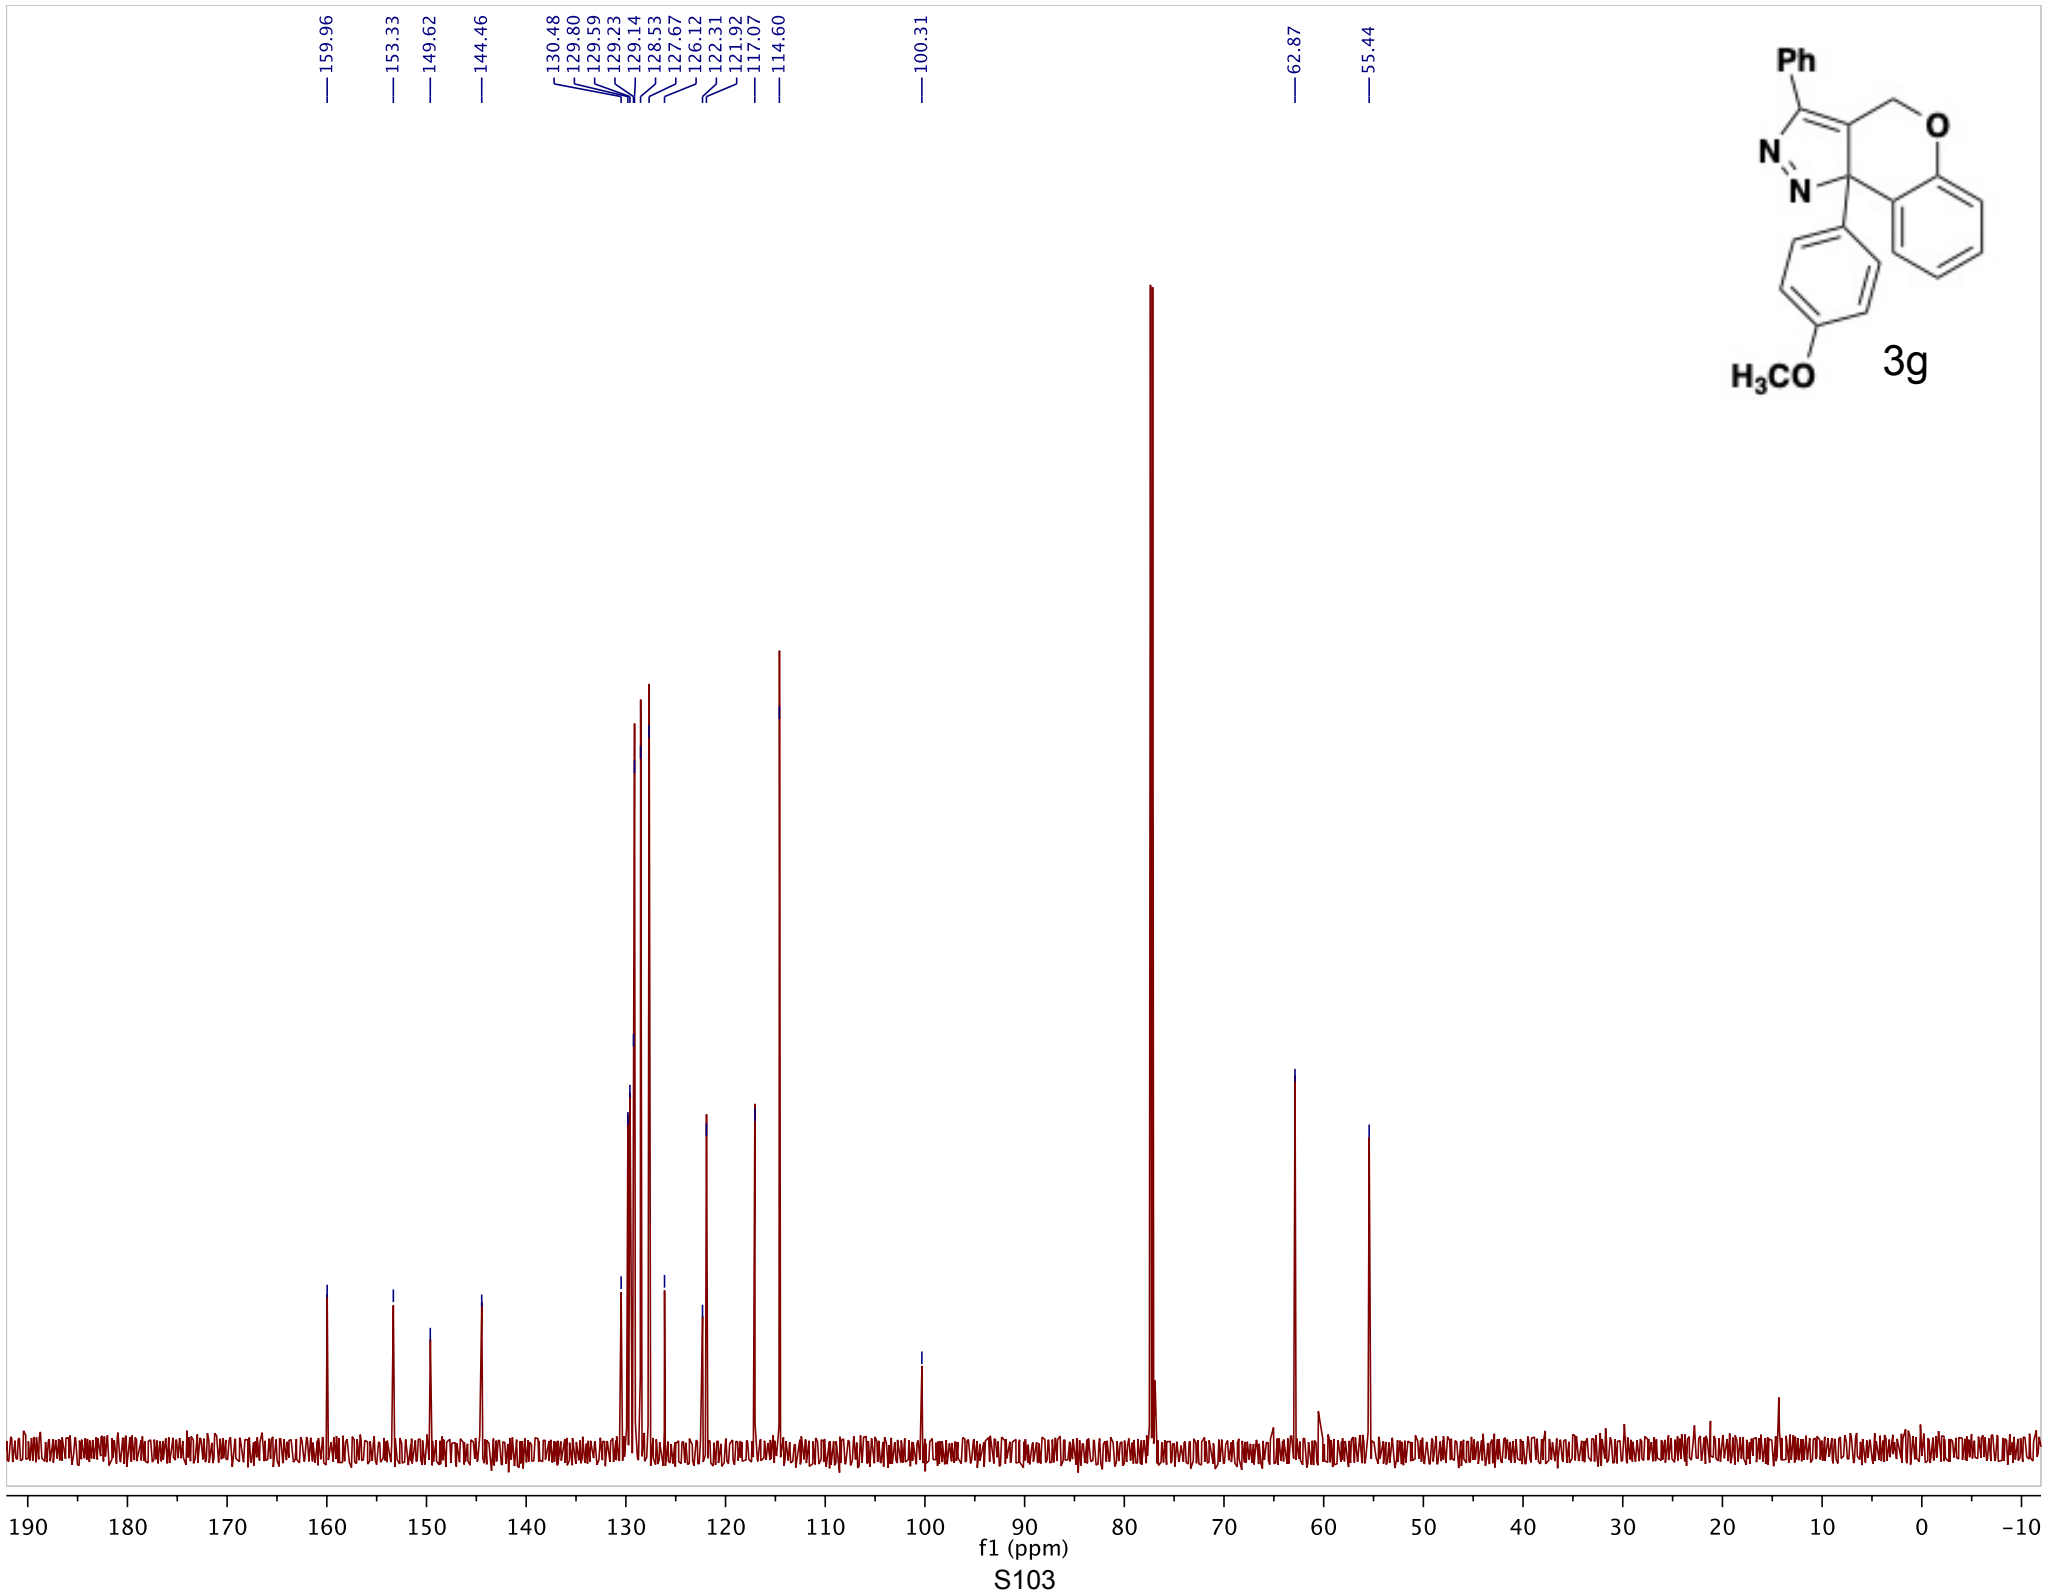

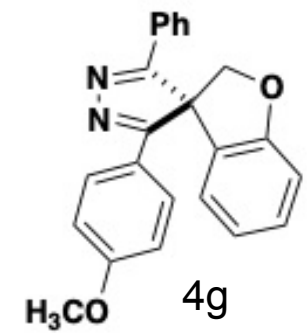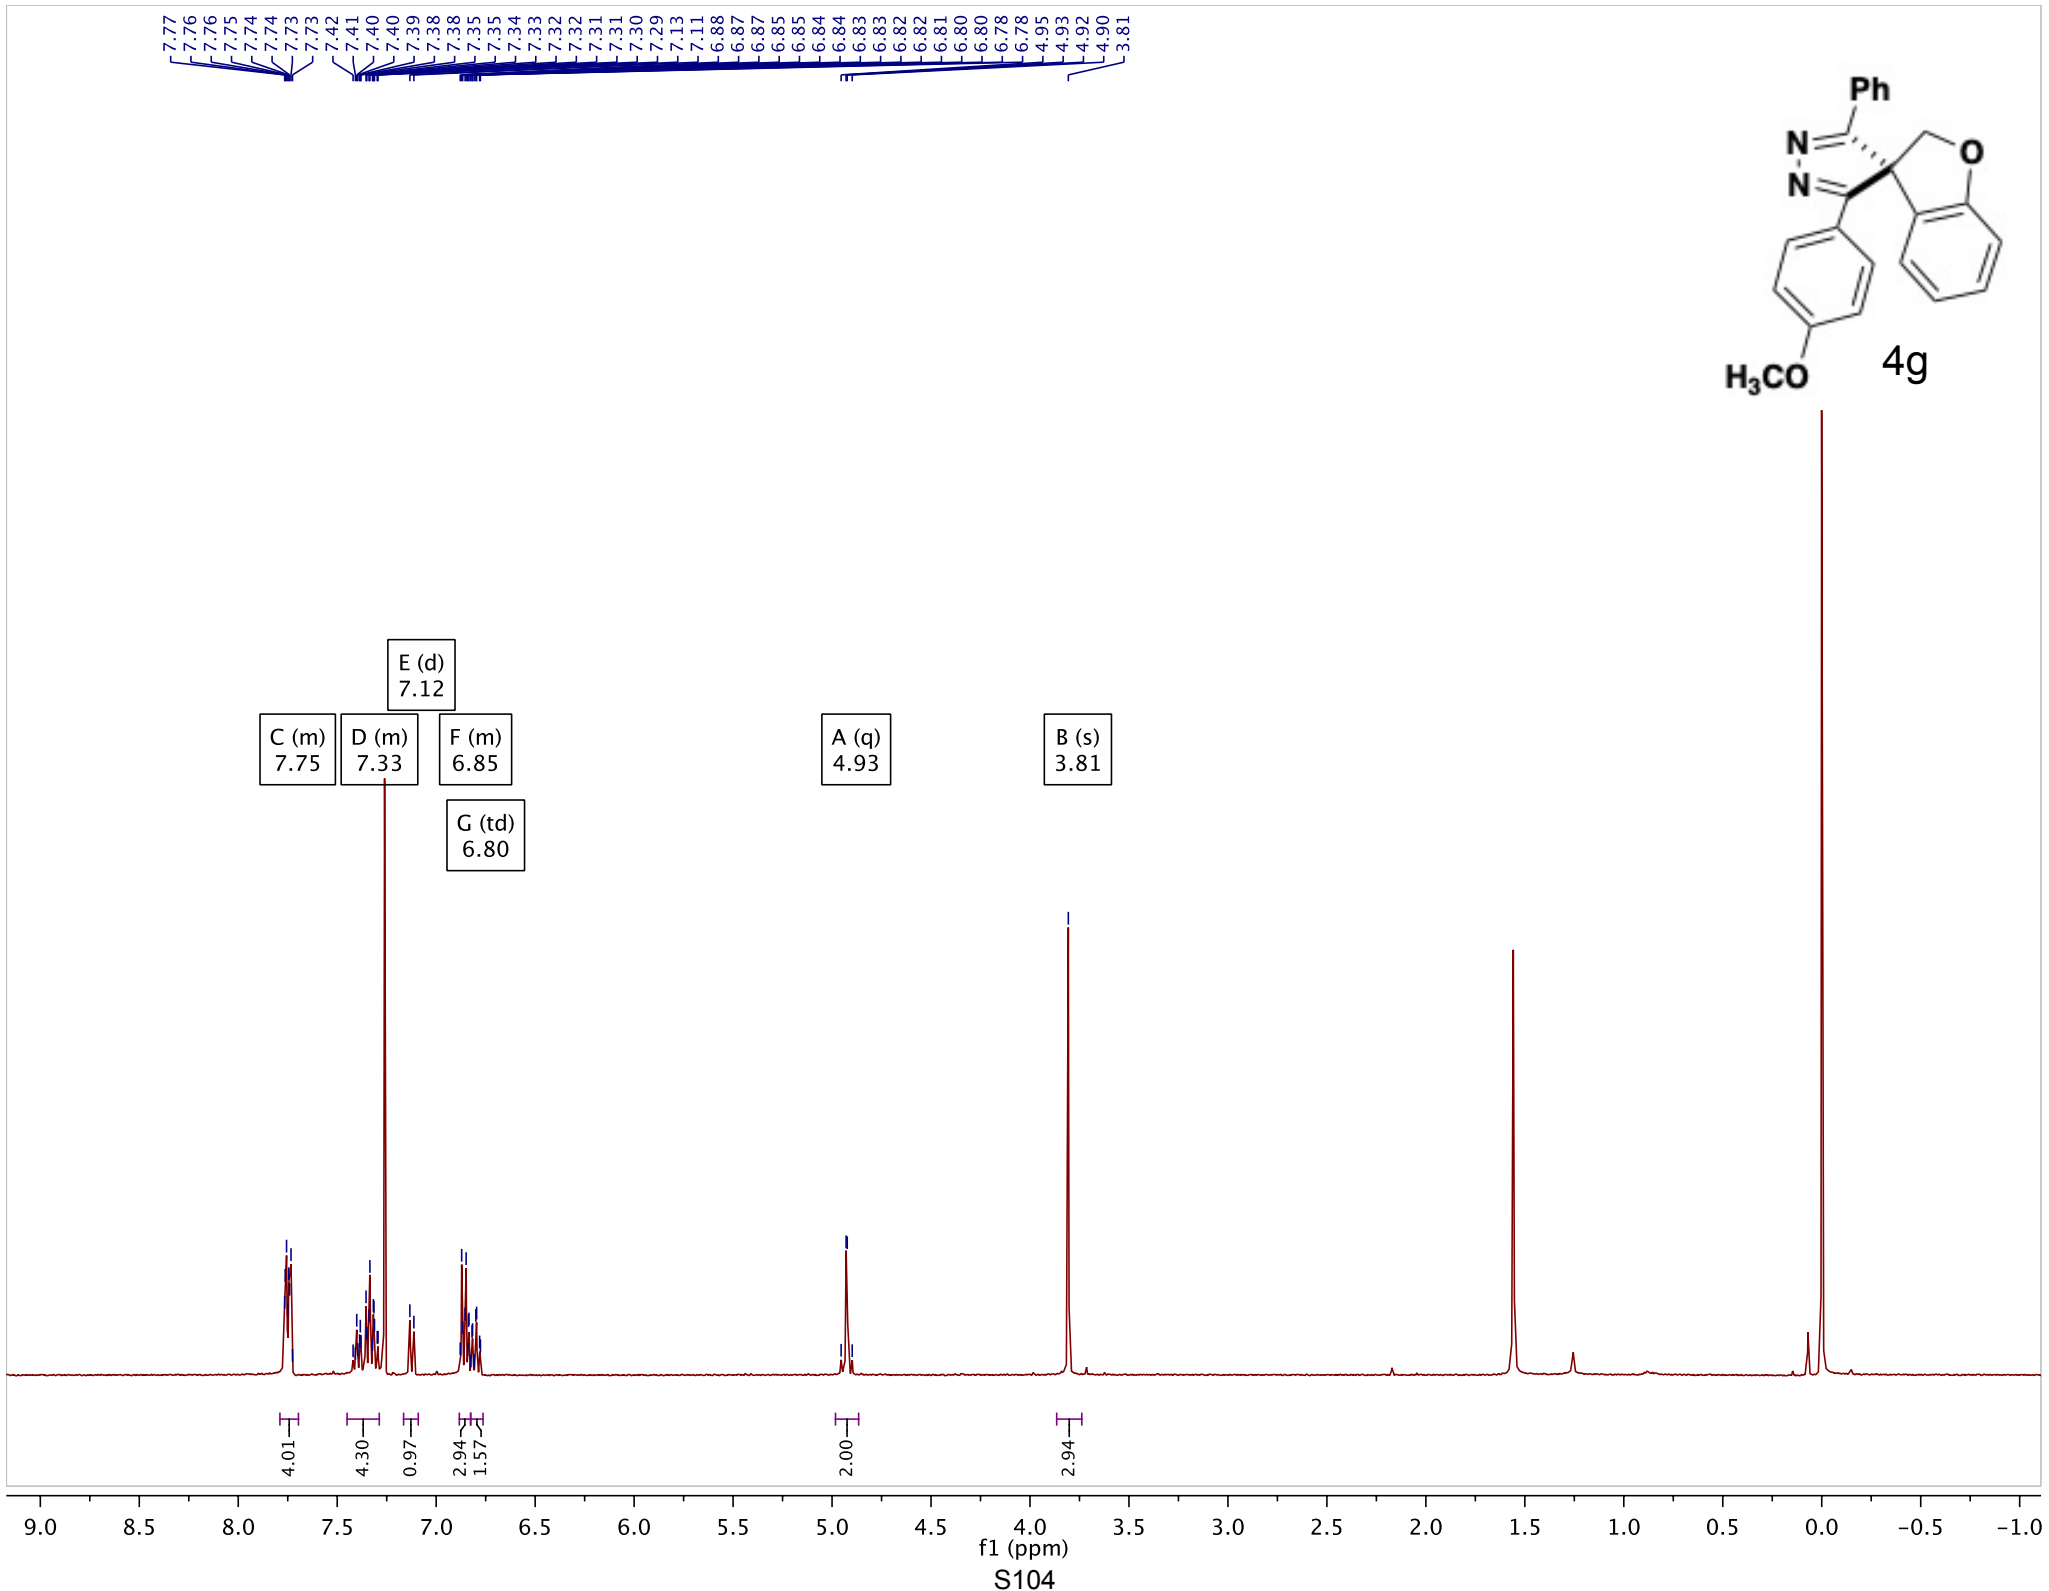



175.57  
175.09  
162.20  
160.62  
131.24  
130.84  
129.79  
129.16  
129.10  
129.09  
127.87  
126.61  
123.99  
122.35  
121.53  
114.60  
111.21

76.09  
70.69  
55.49

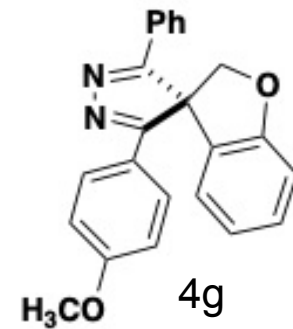

190 180 170 160 150 140 130 120 110 100 90 80 70 60 50 40 30 20 10 0 -10 -20 -30

f1 (ppm)

S105

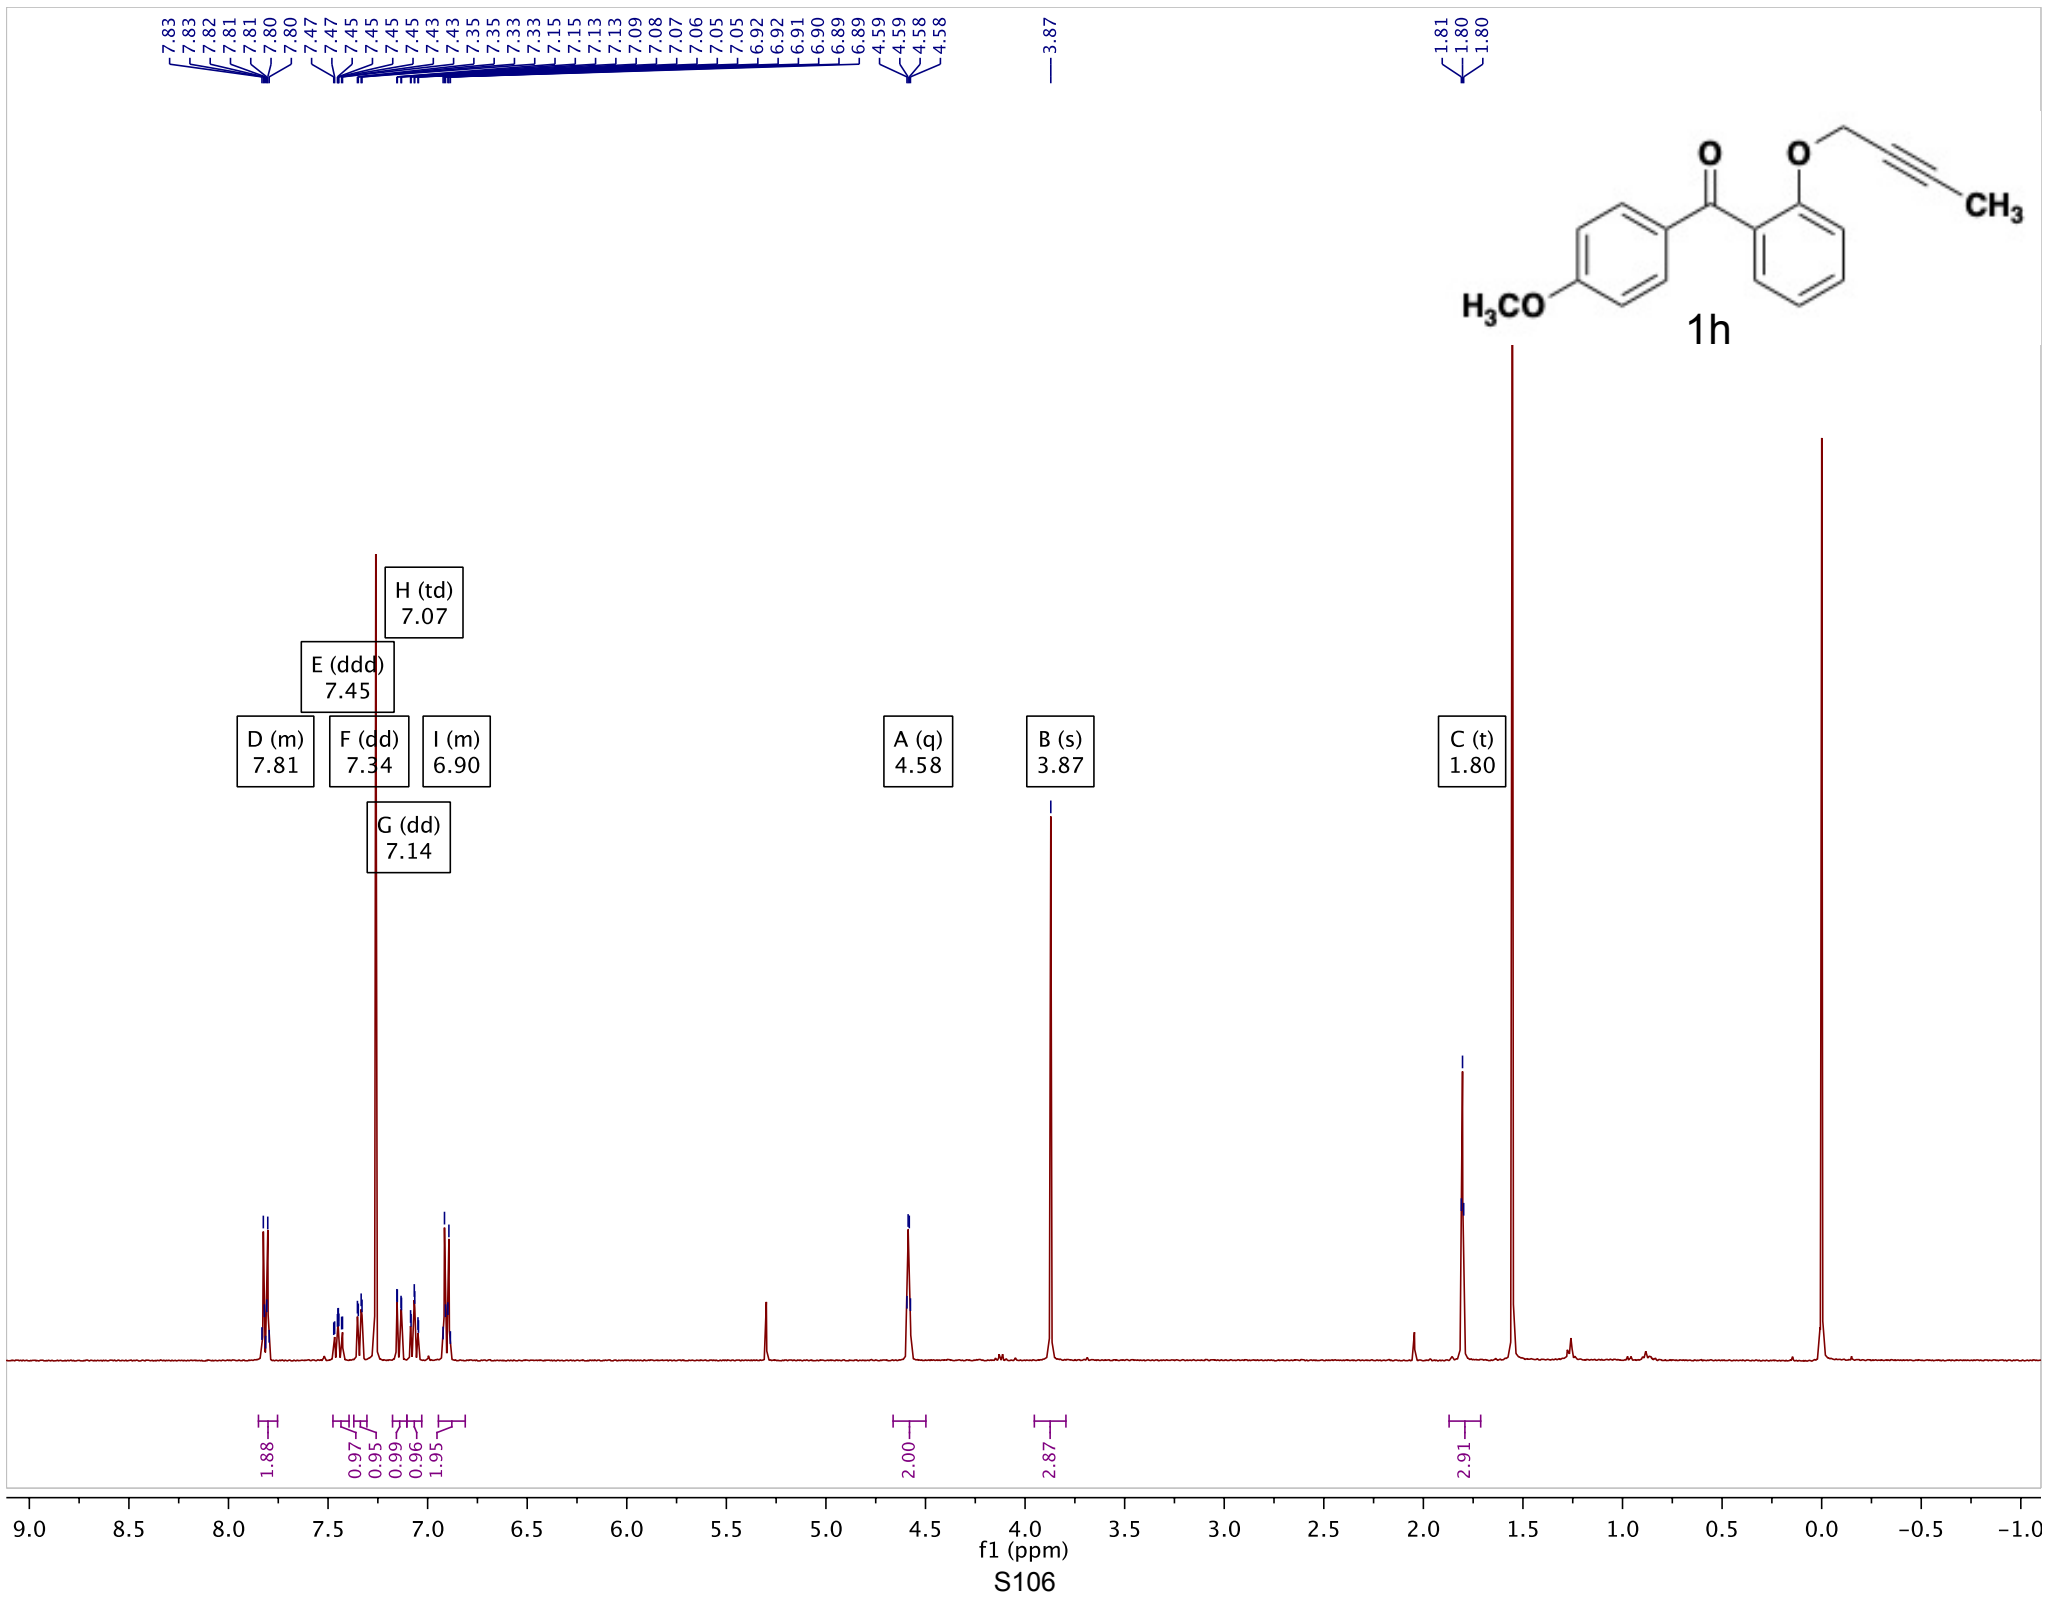

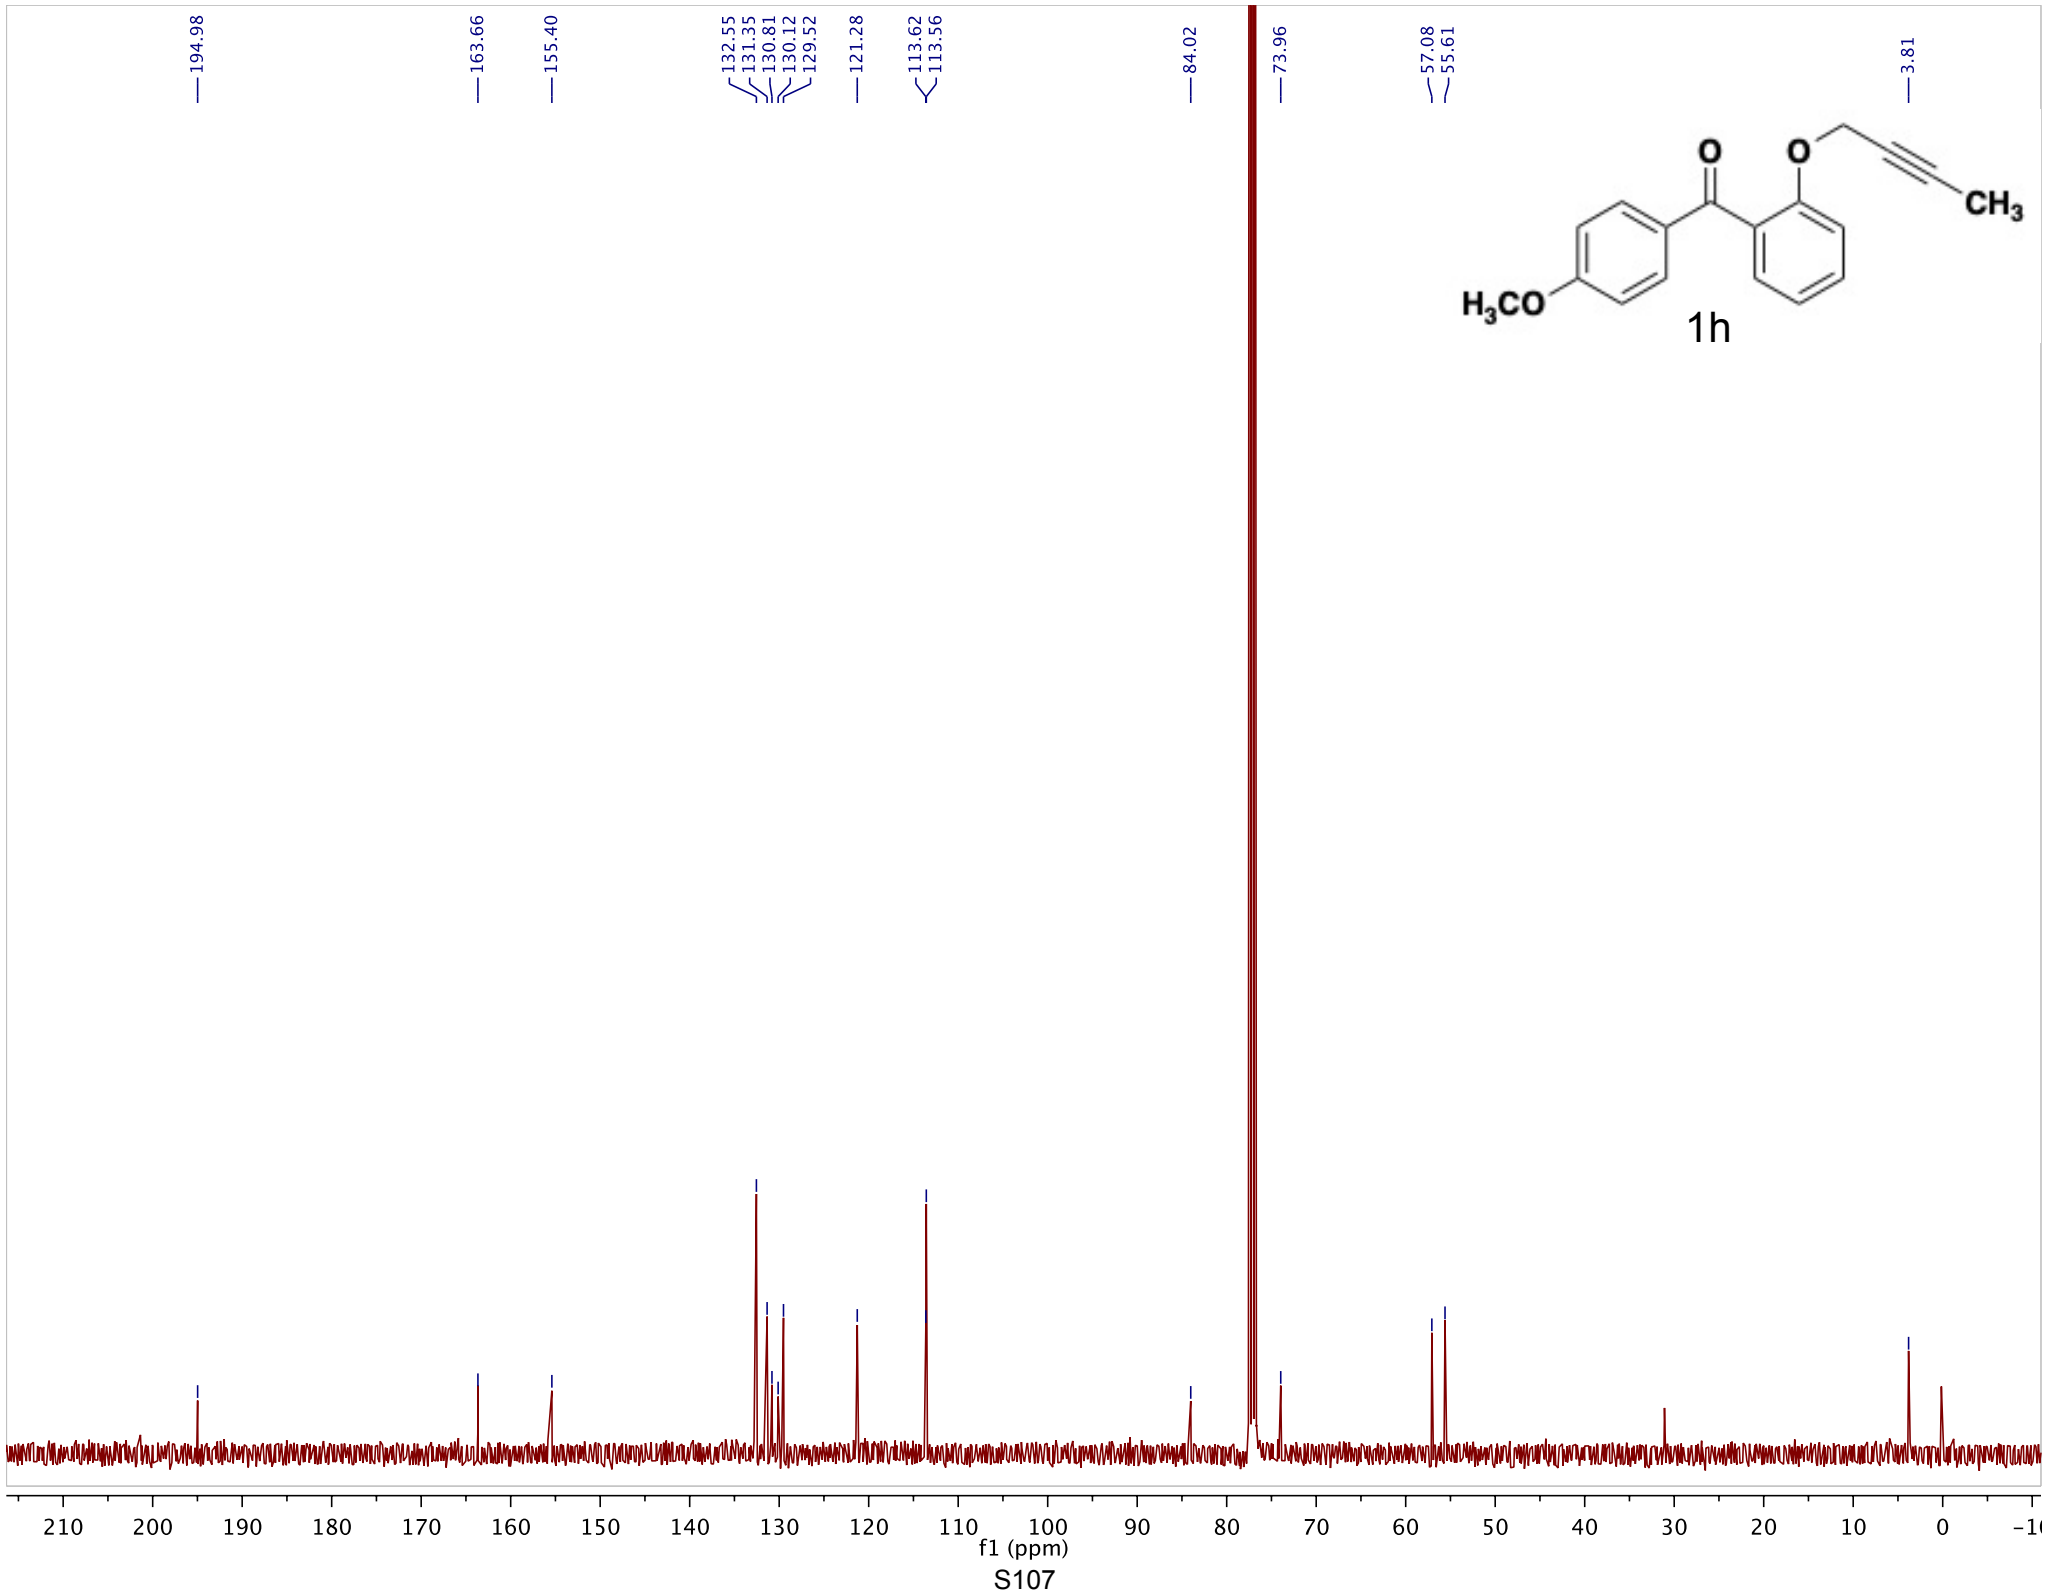

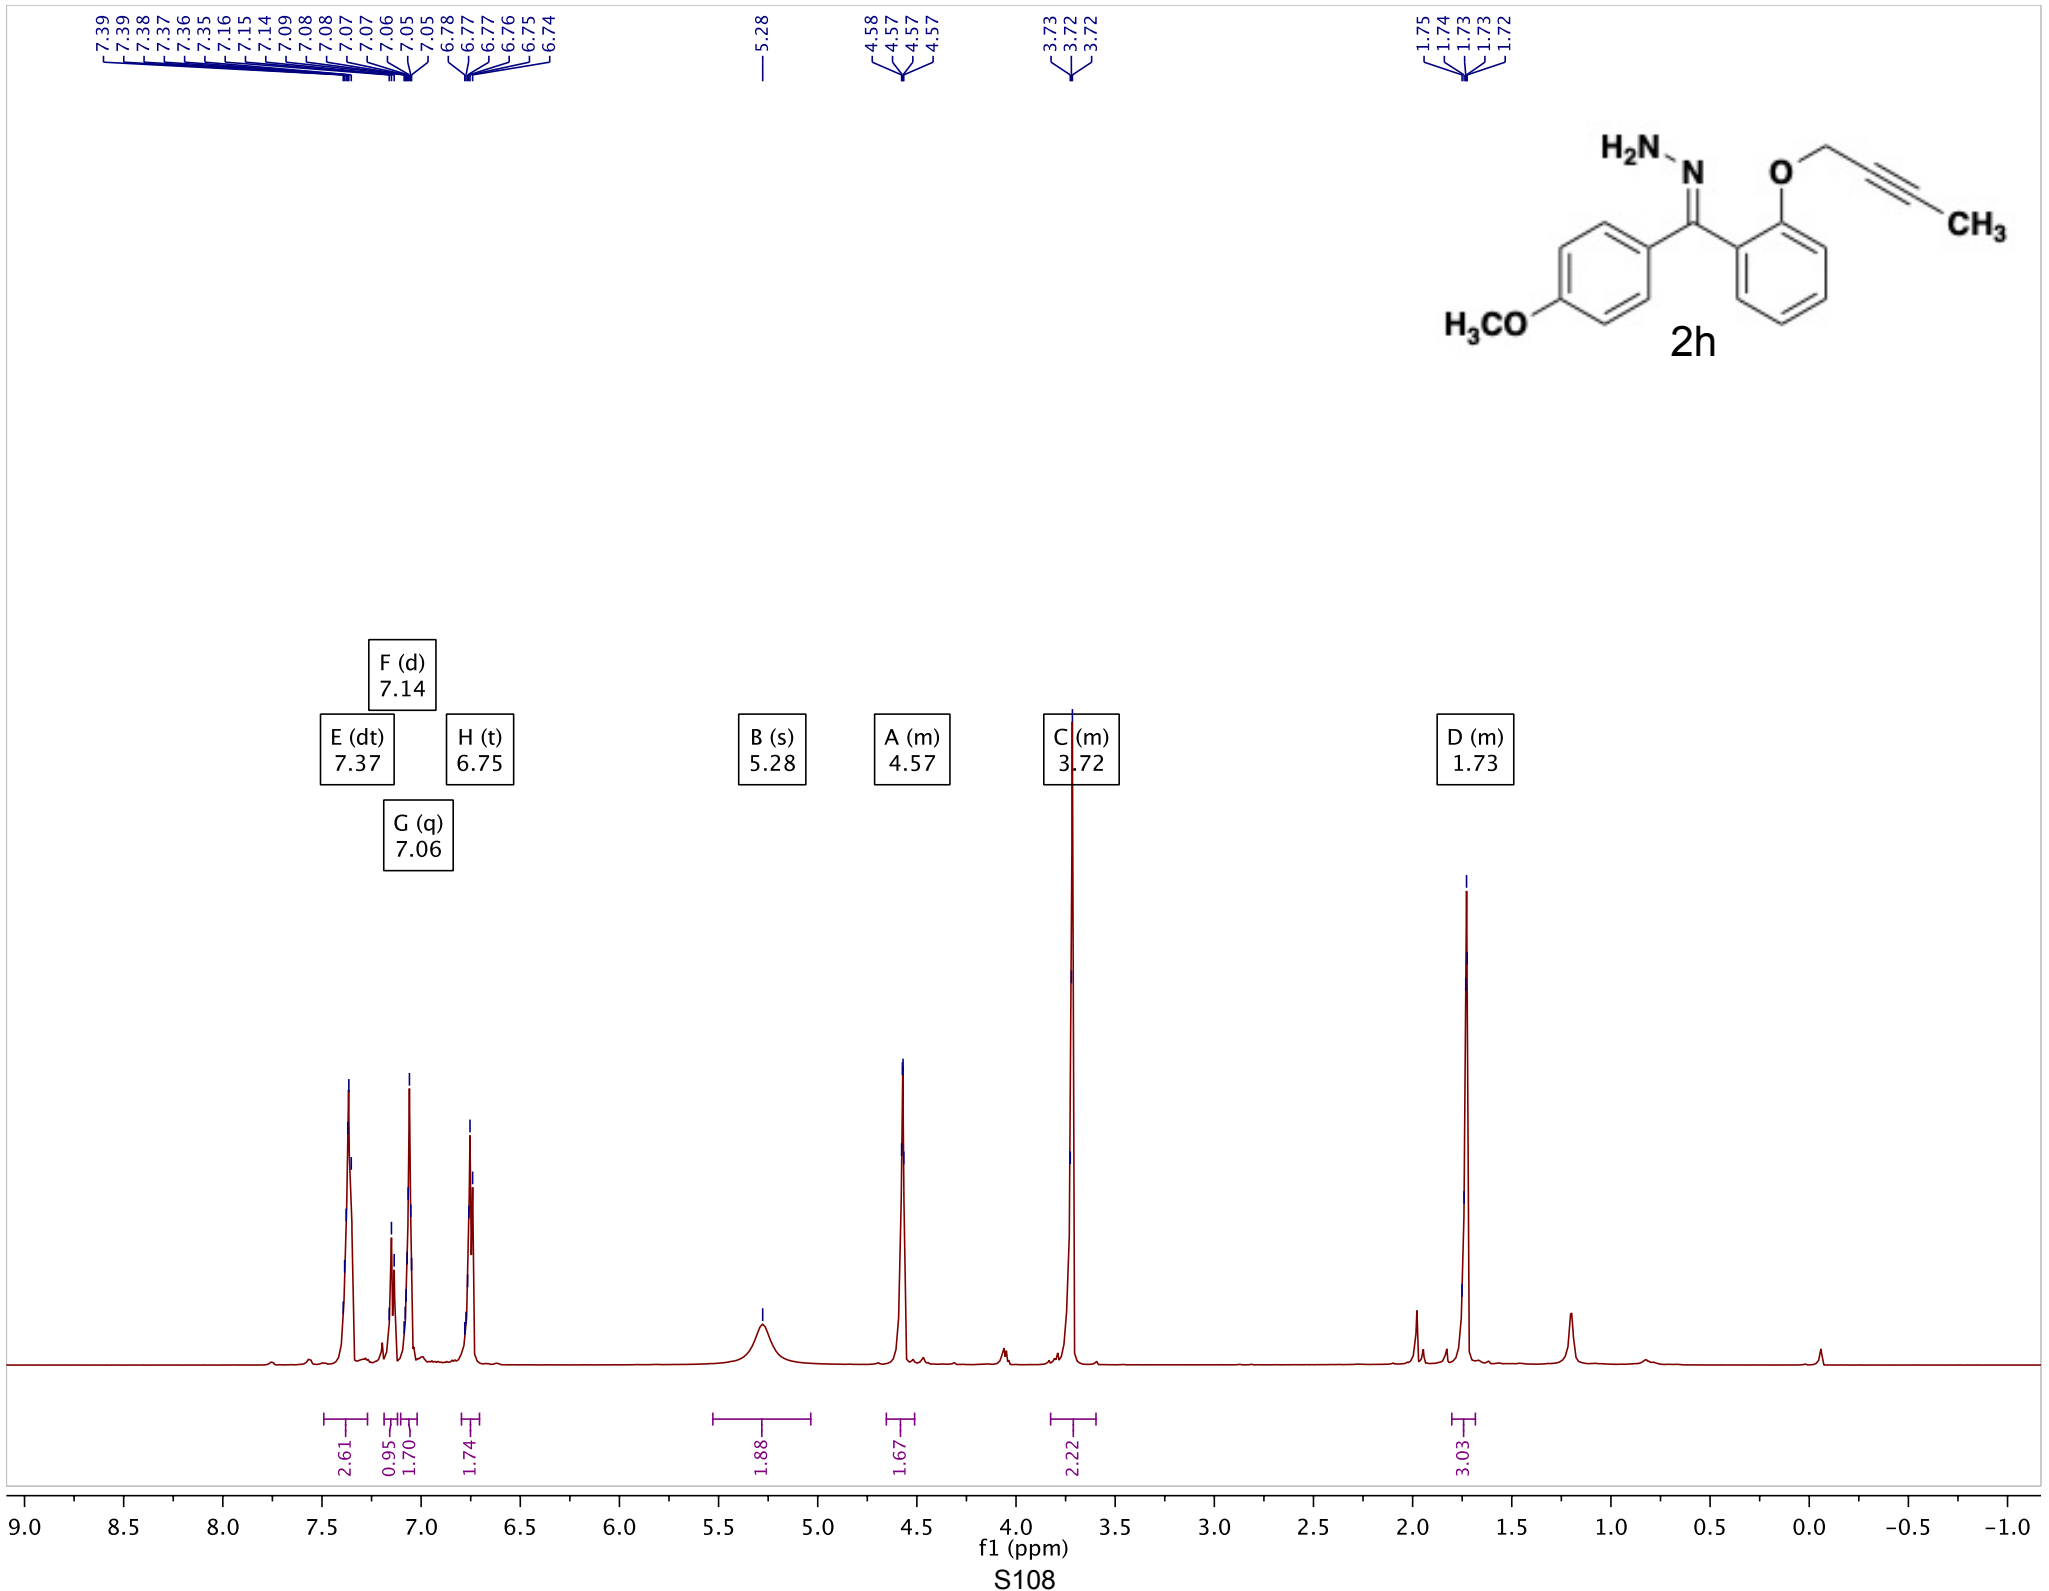

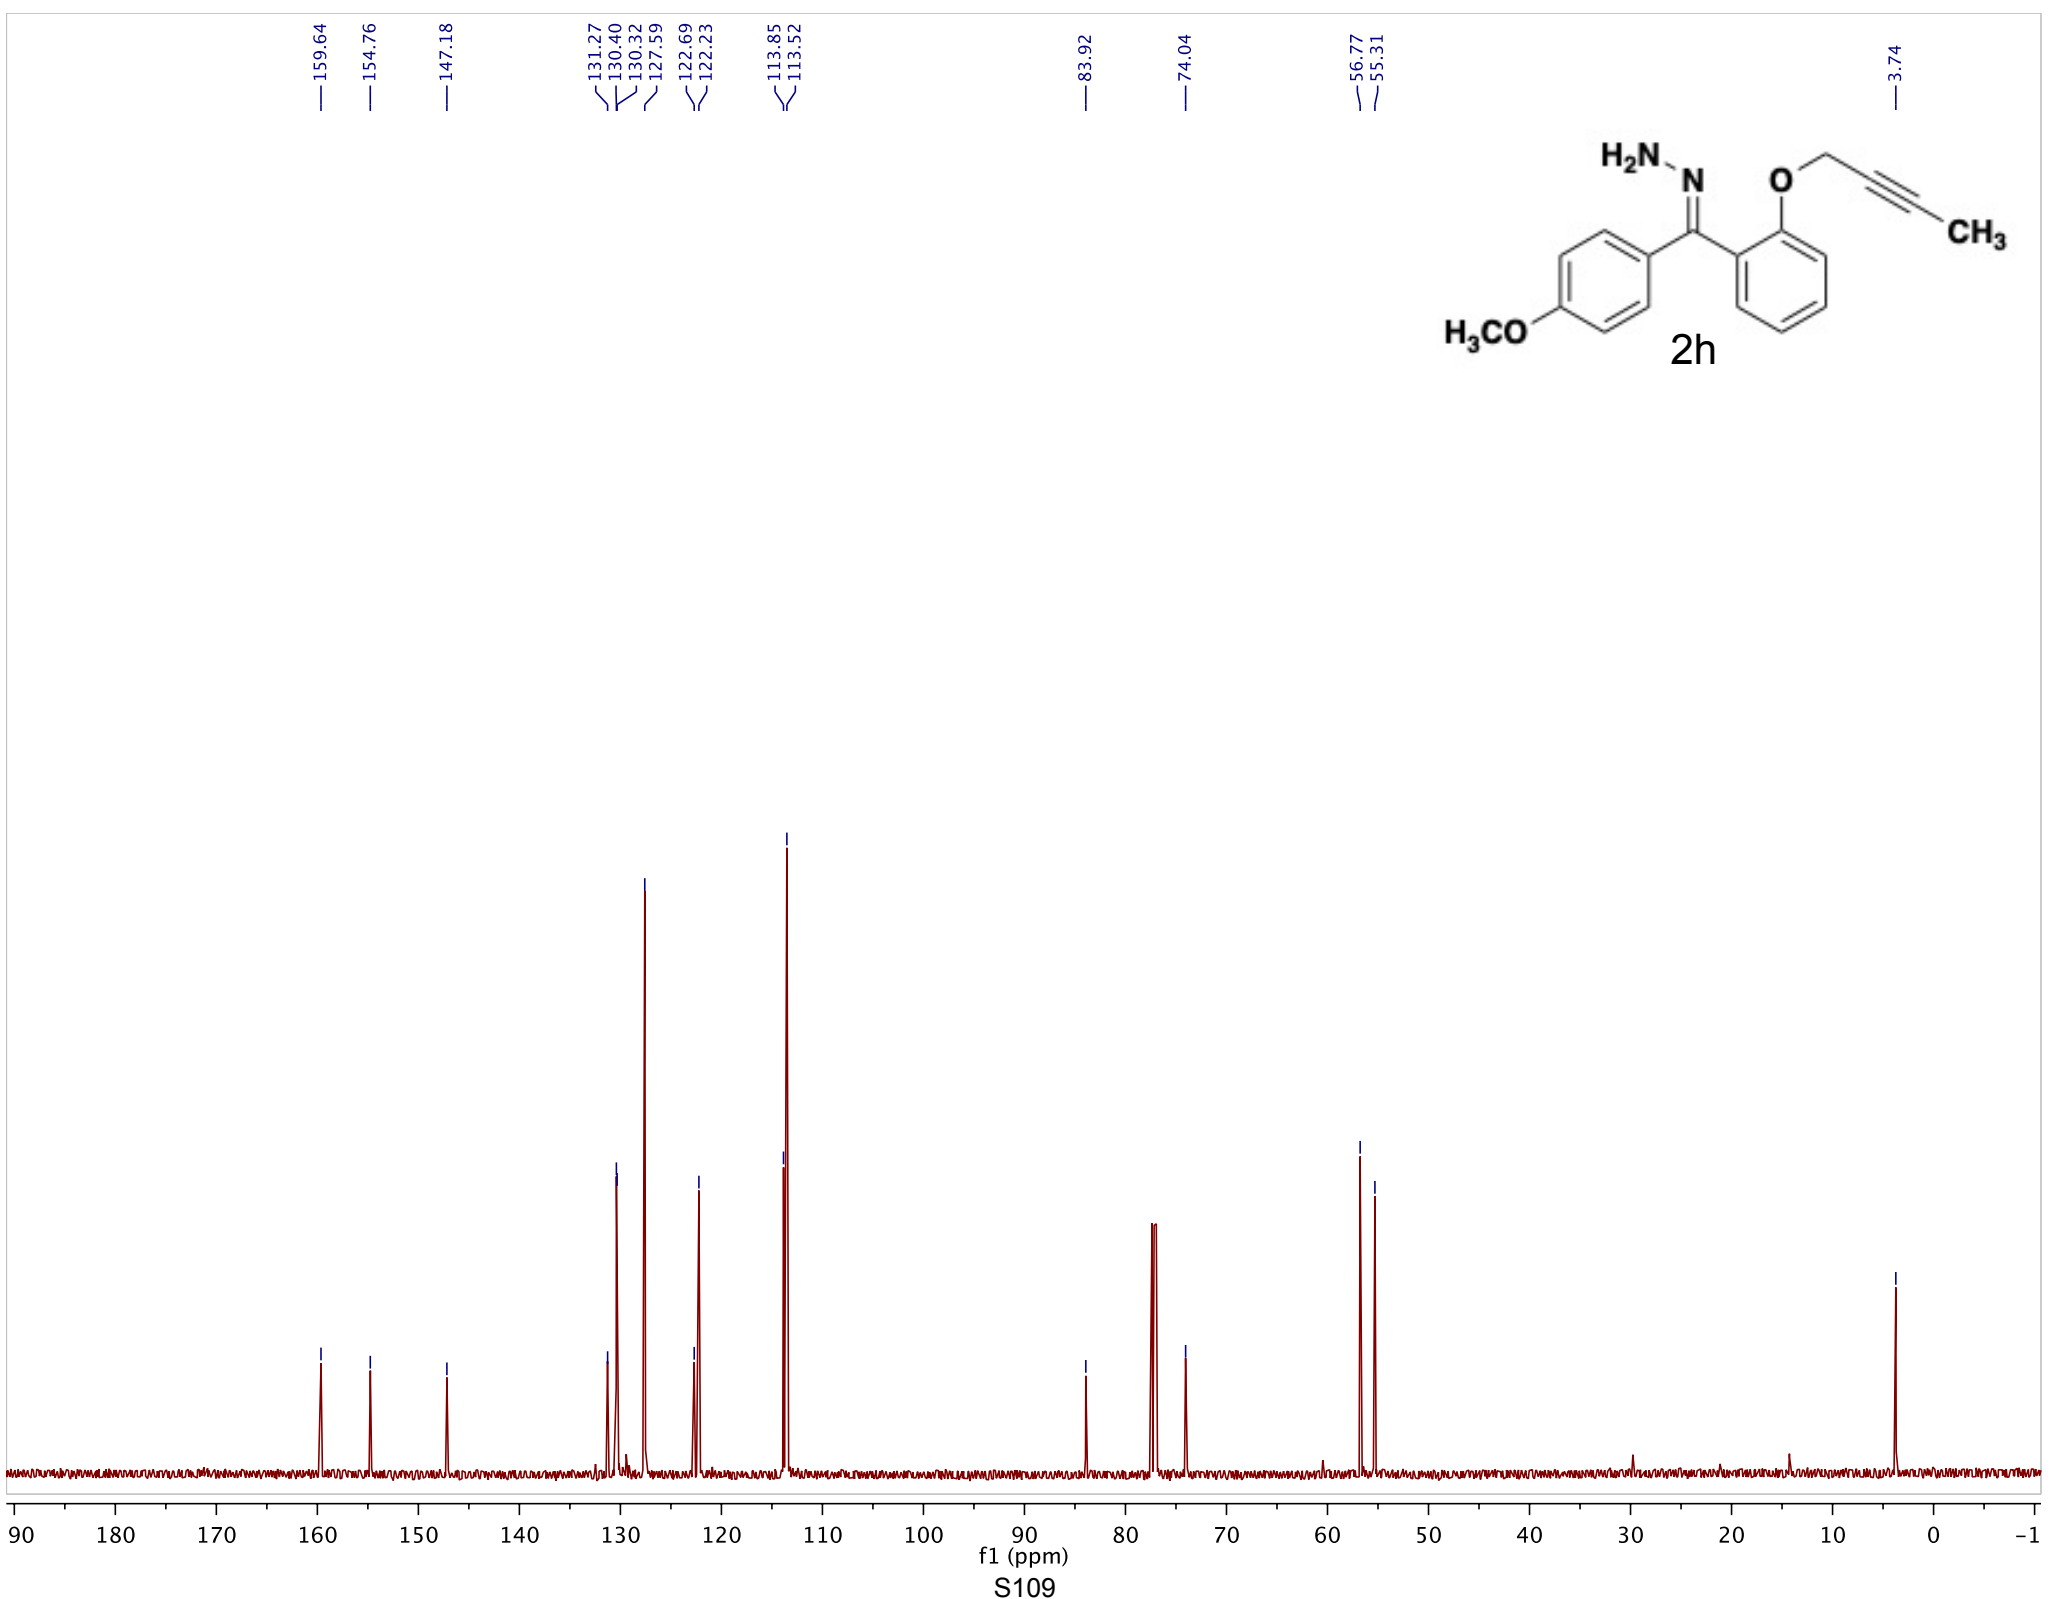

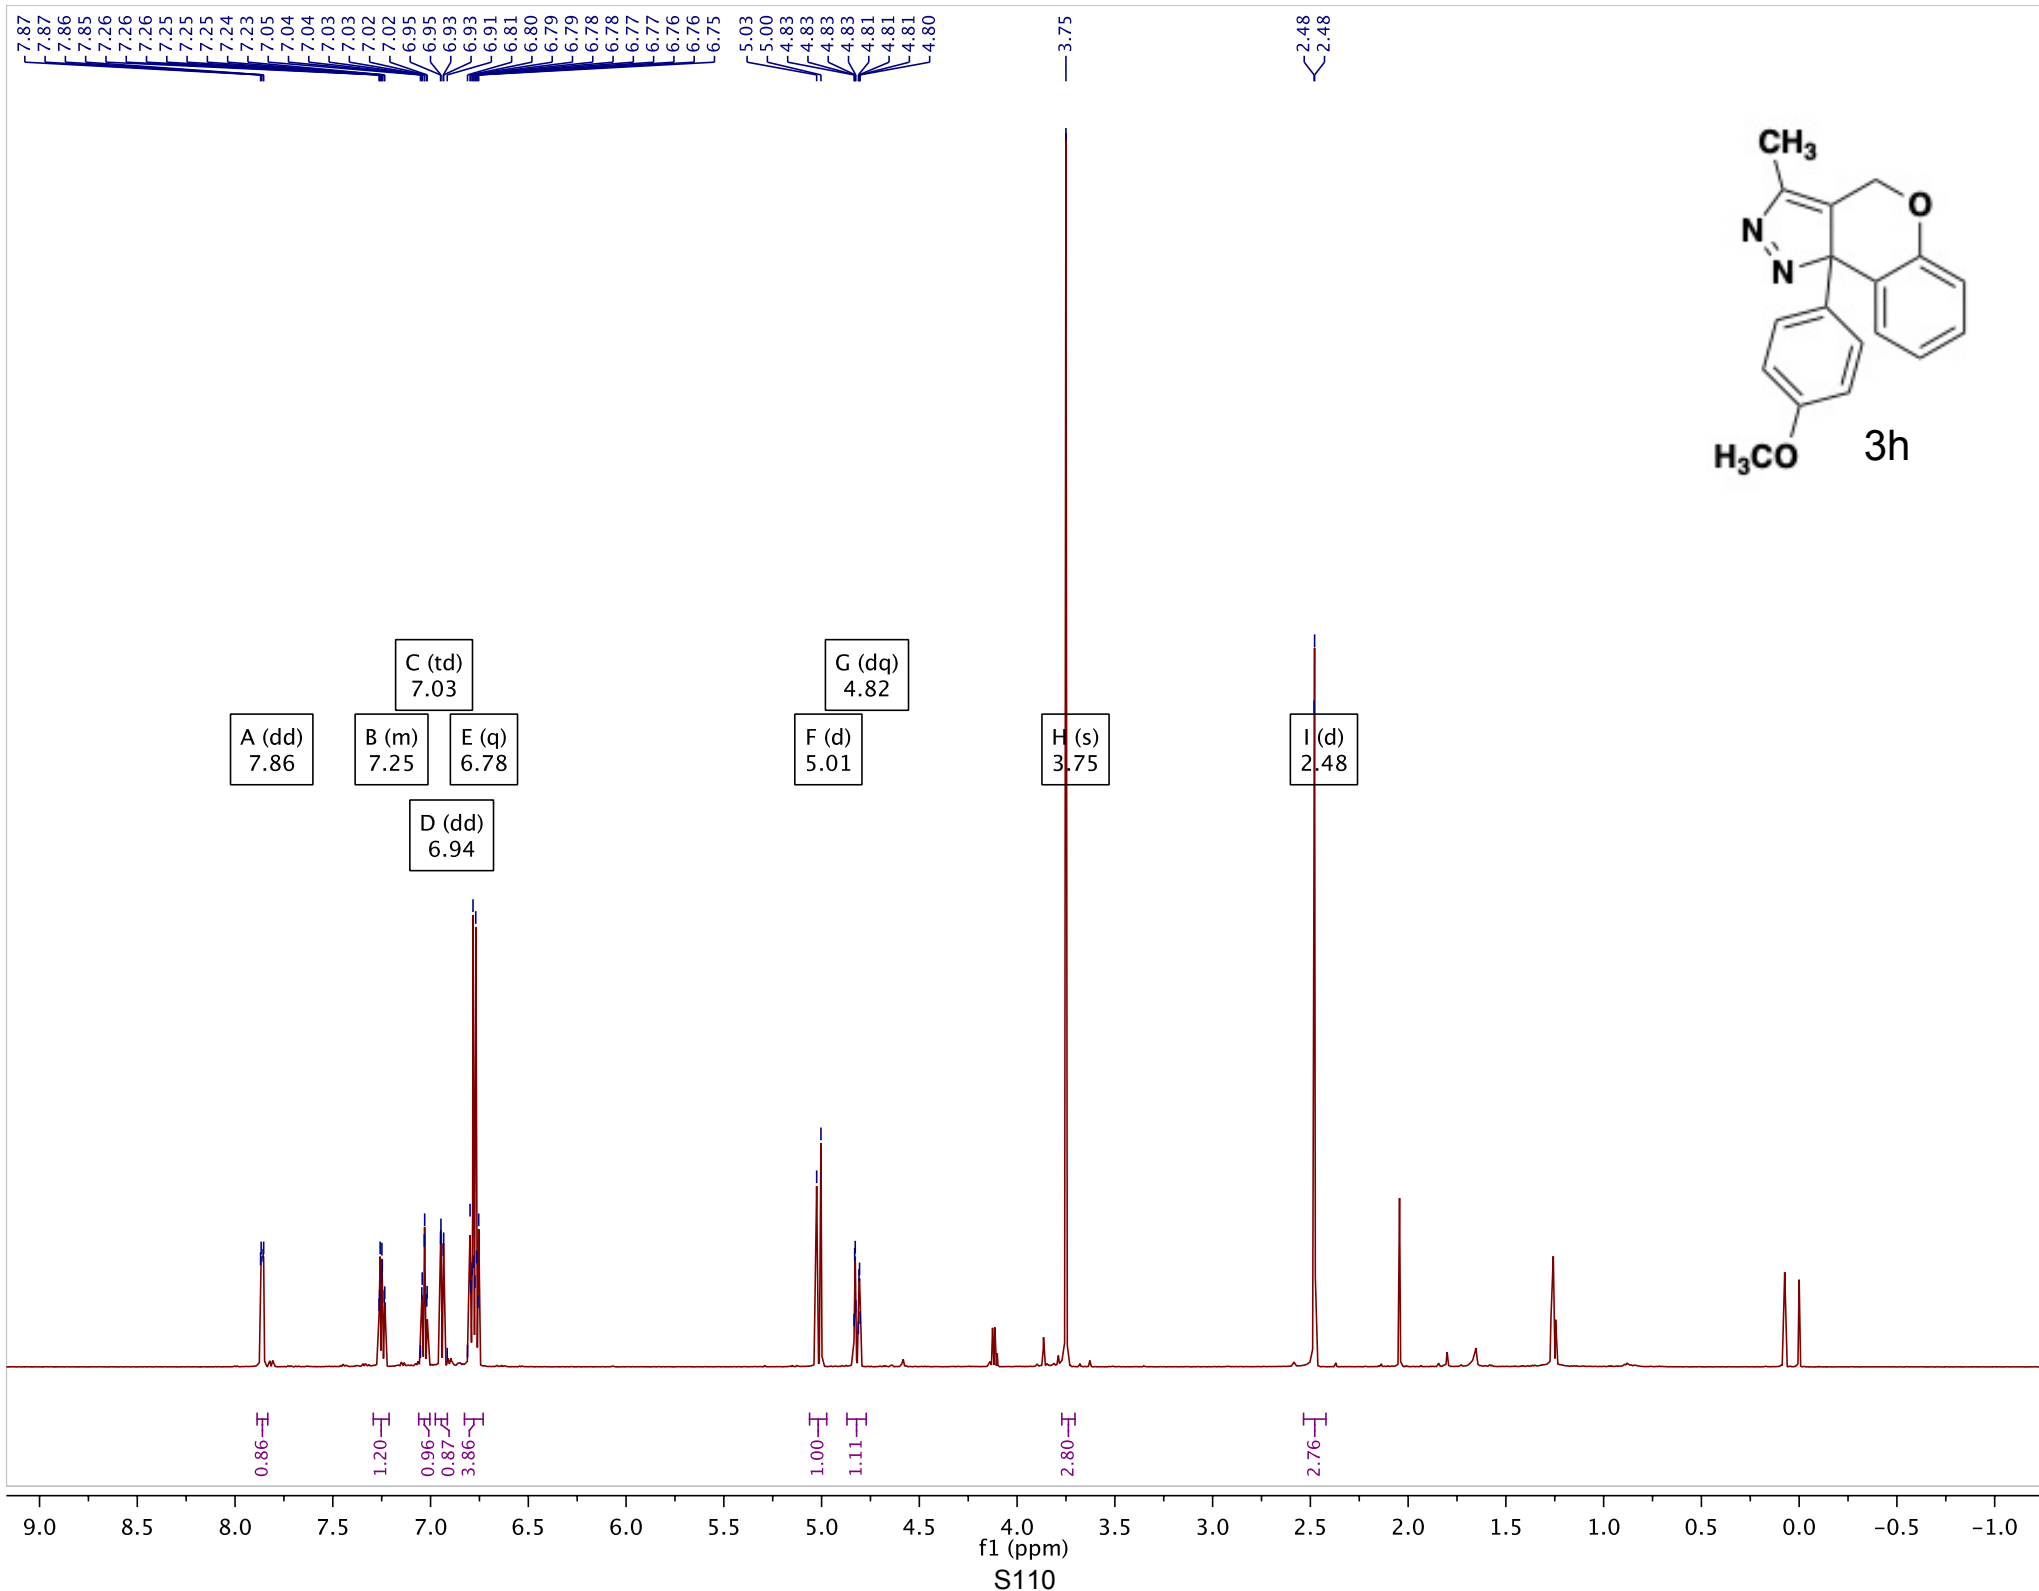

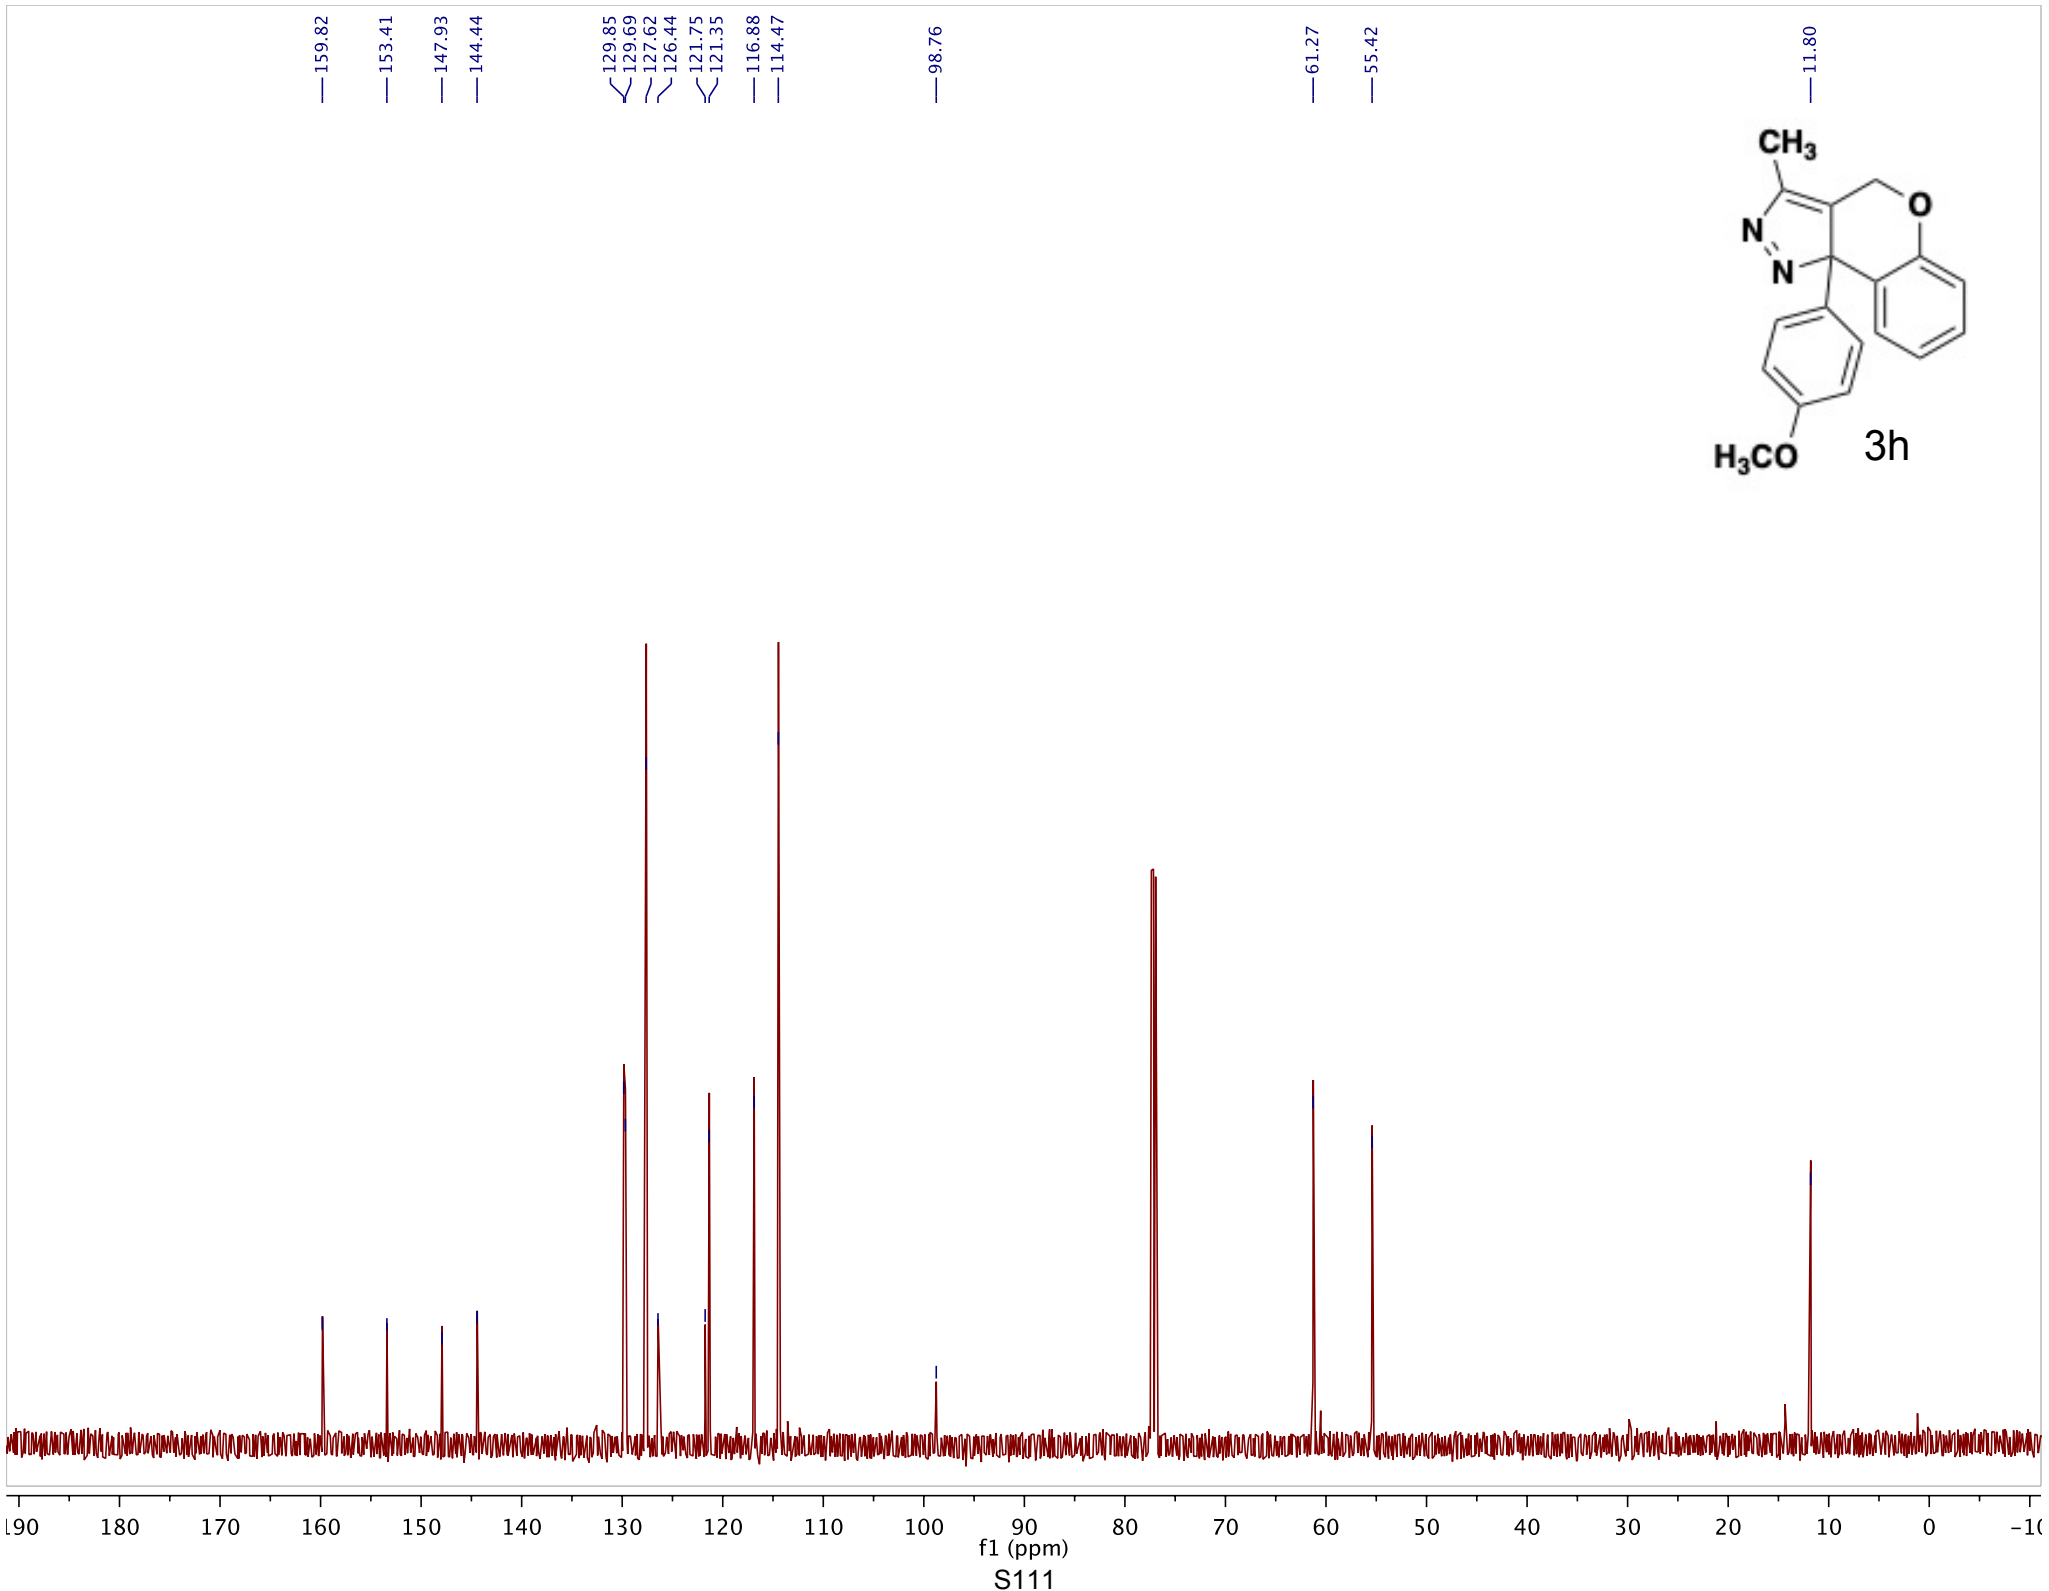

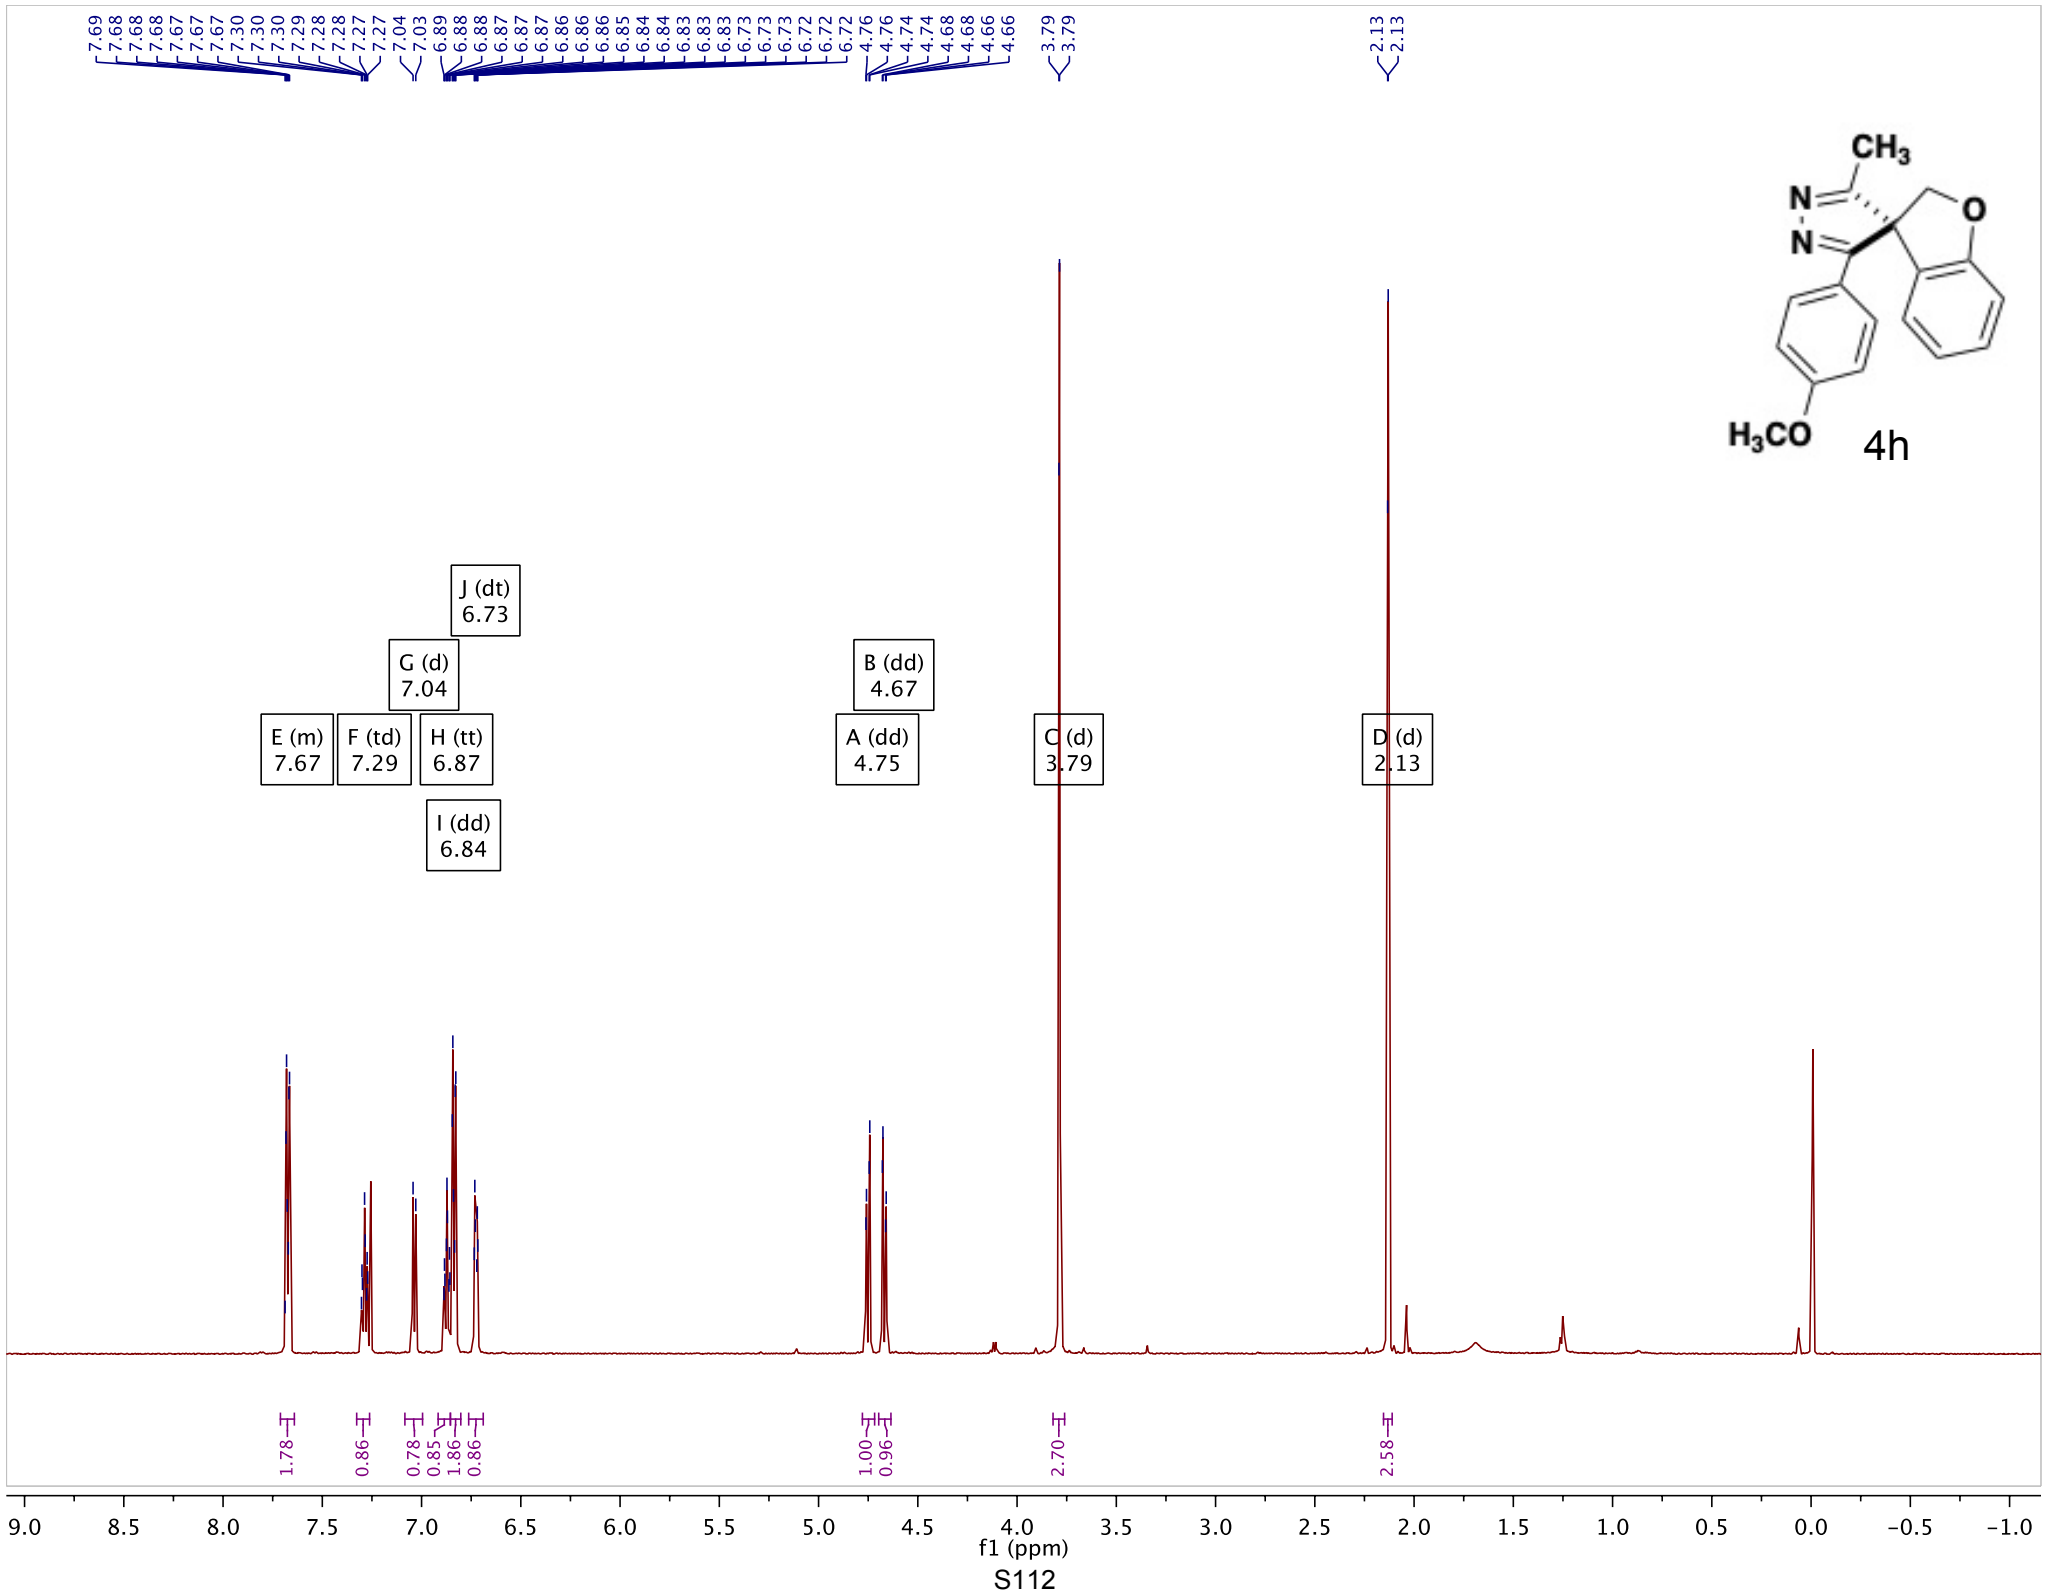



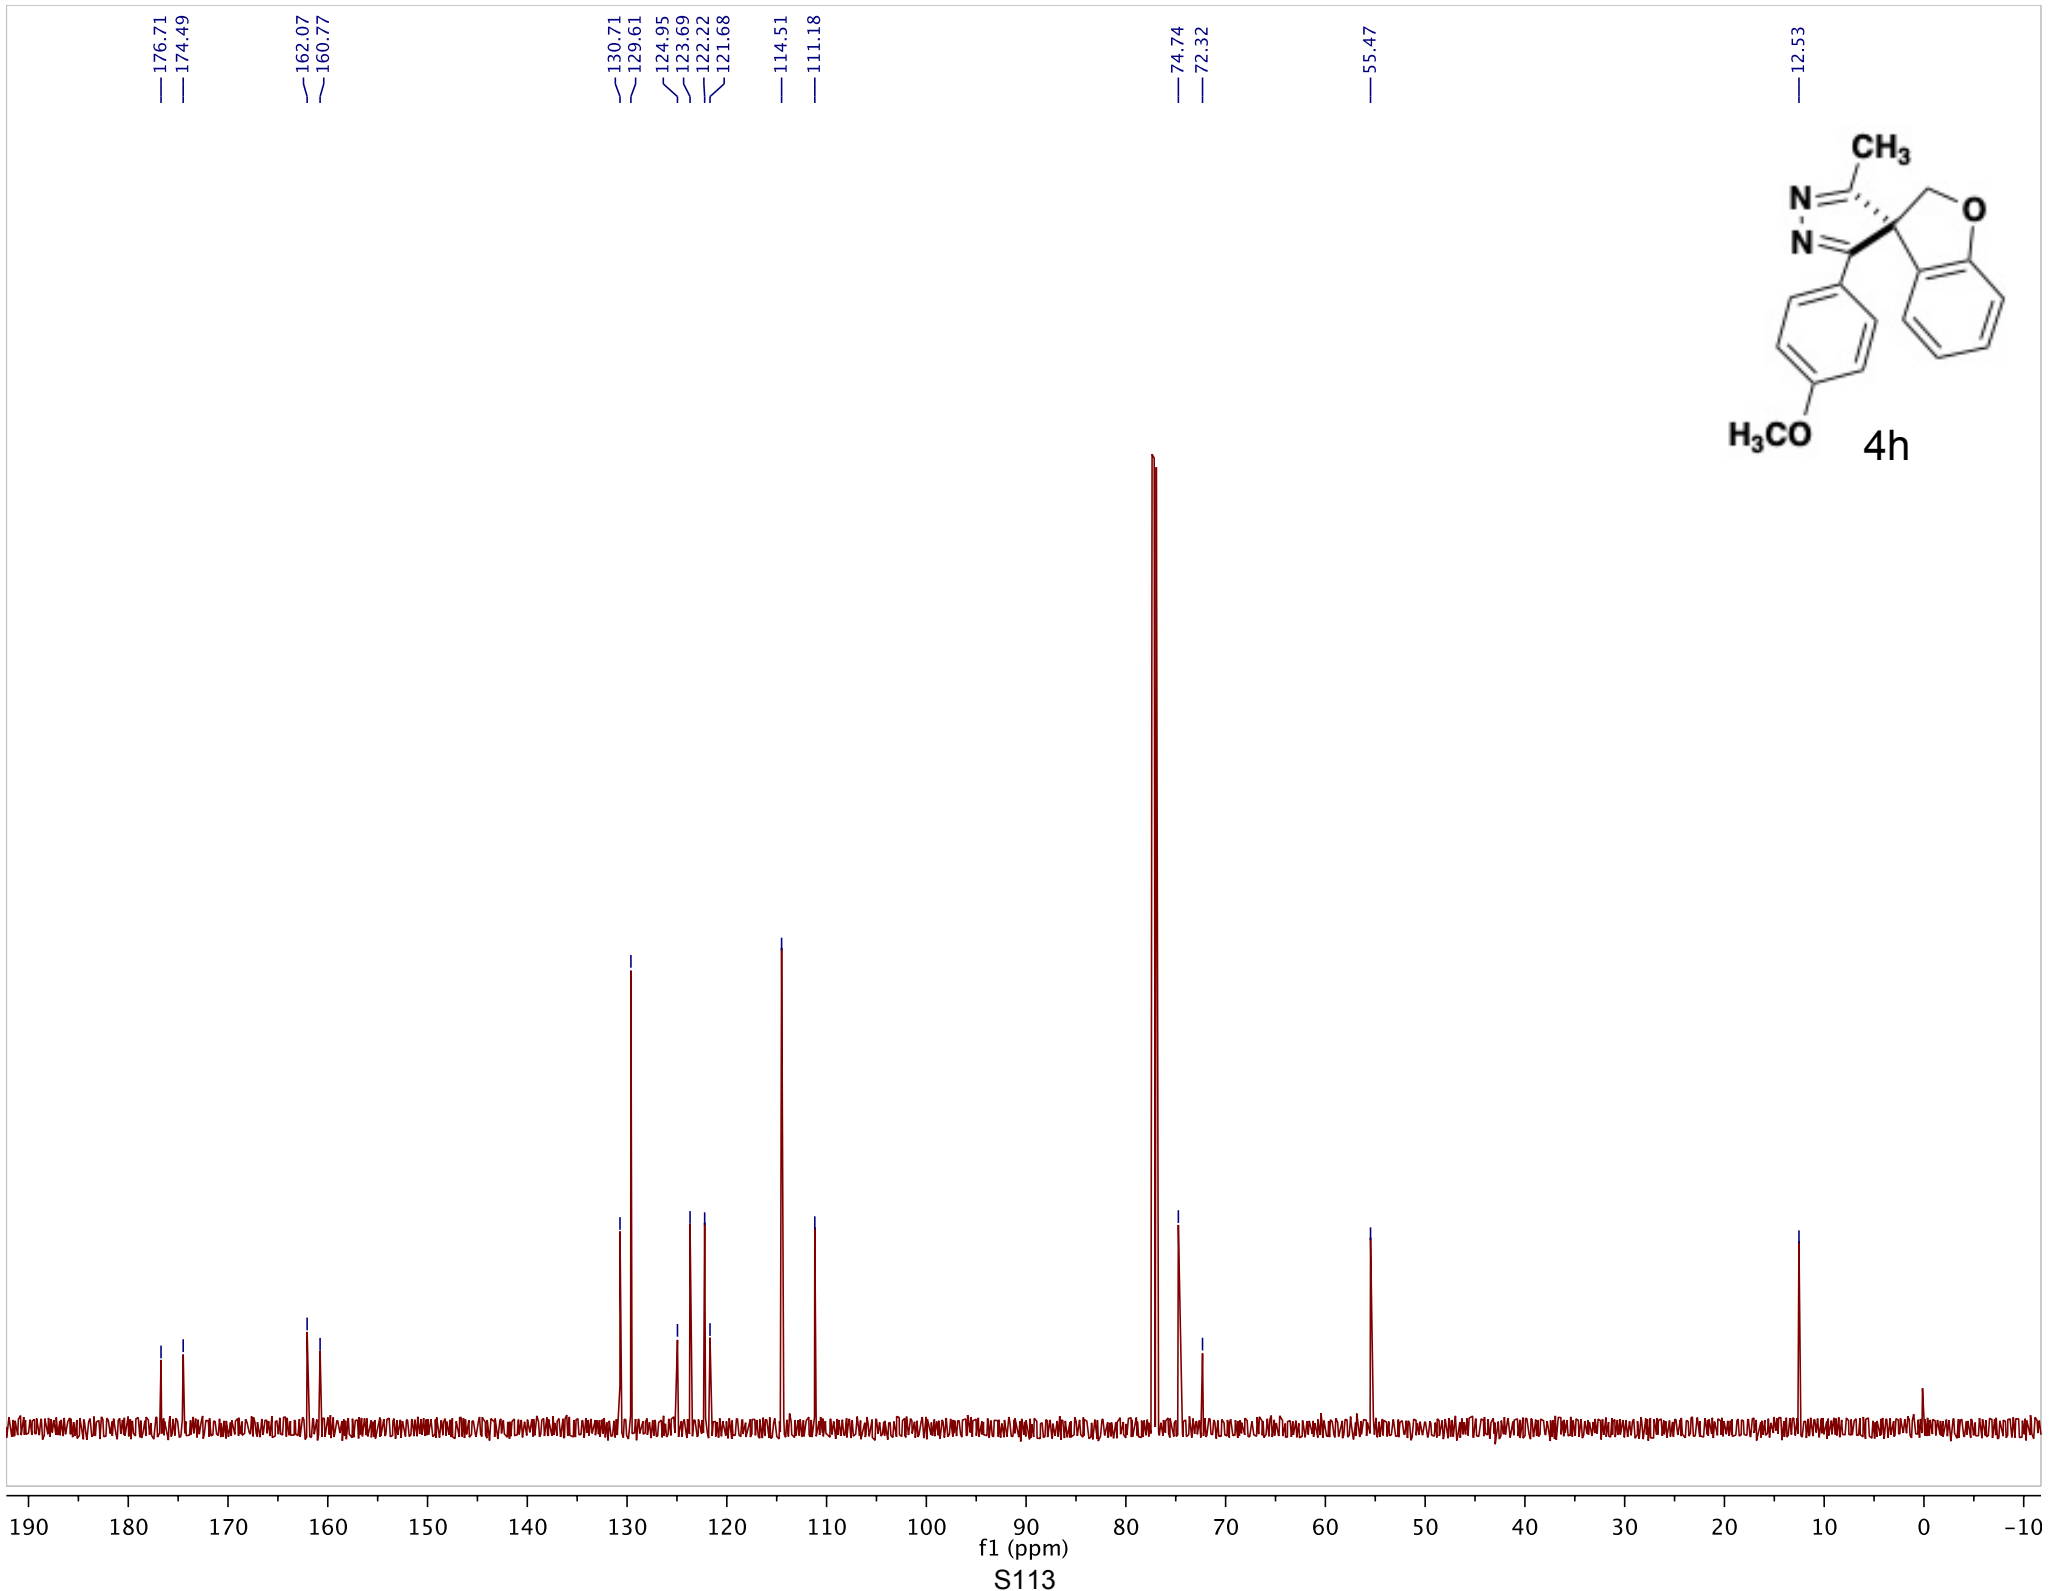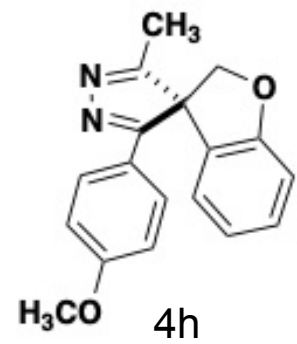

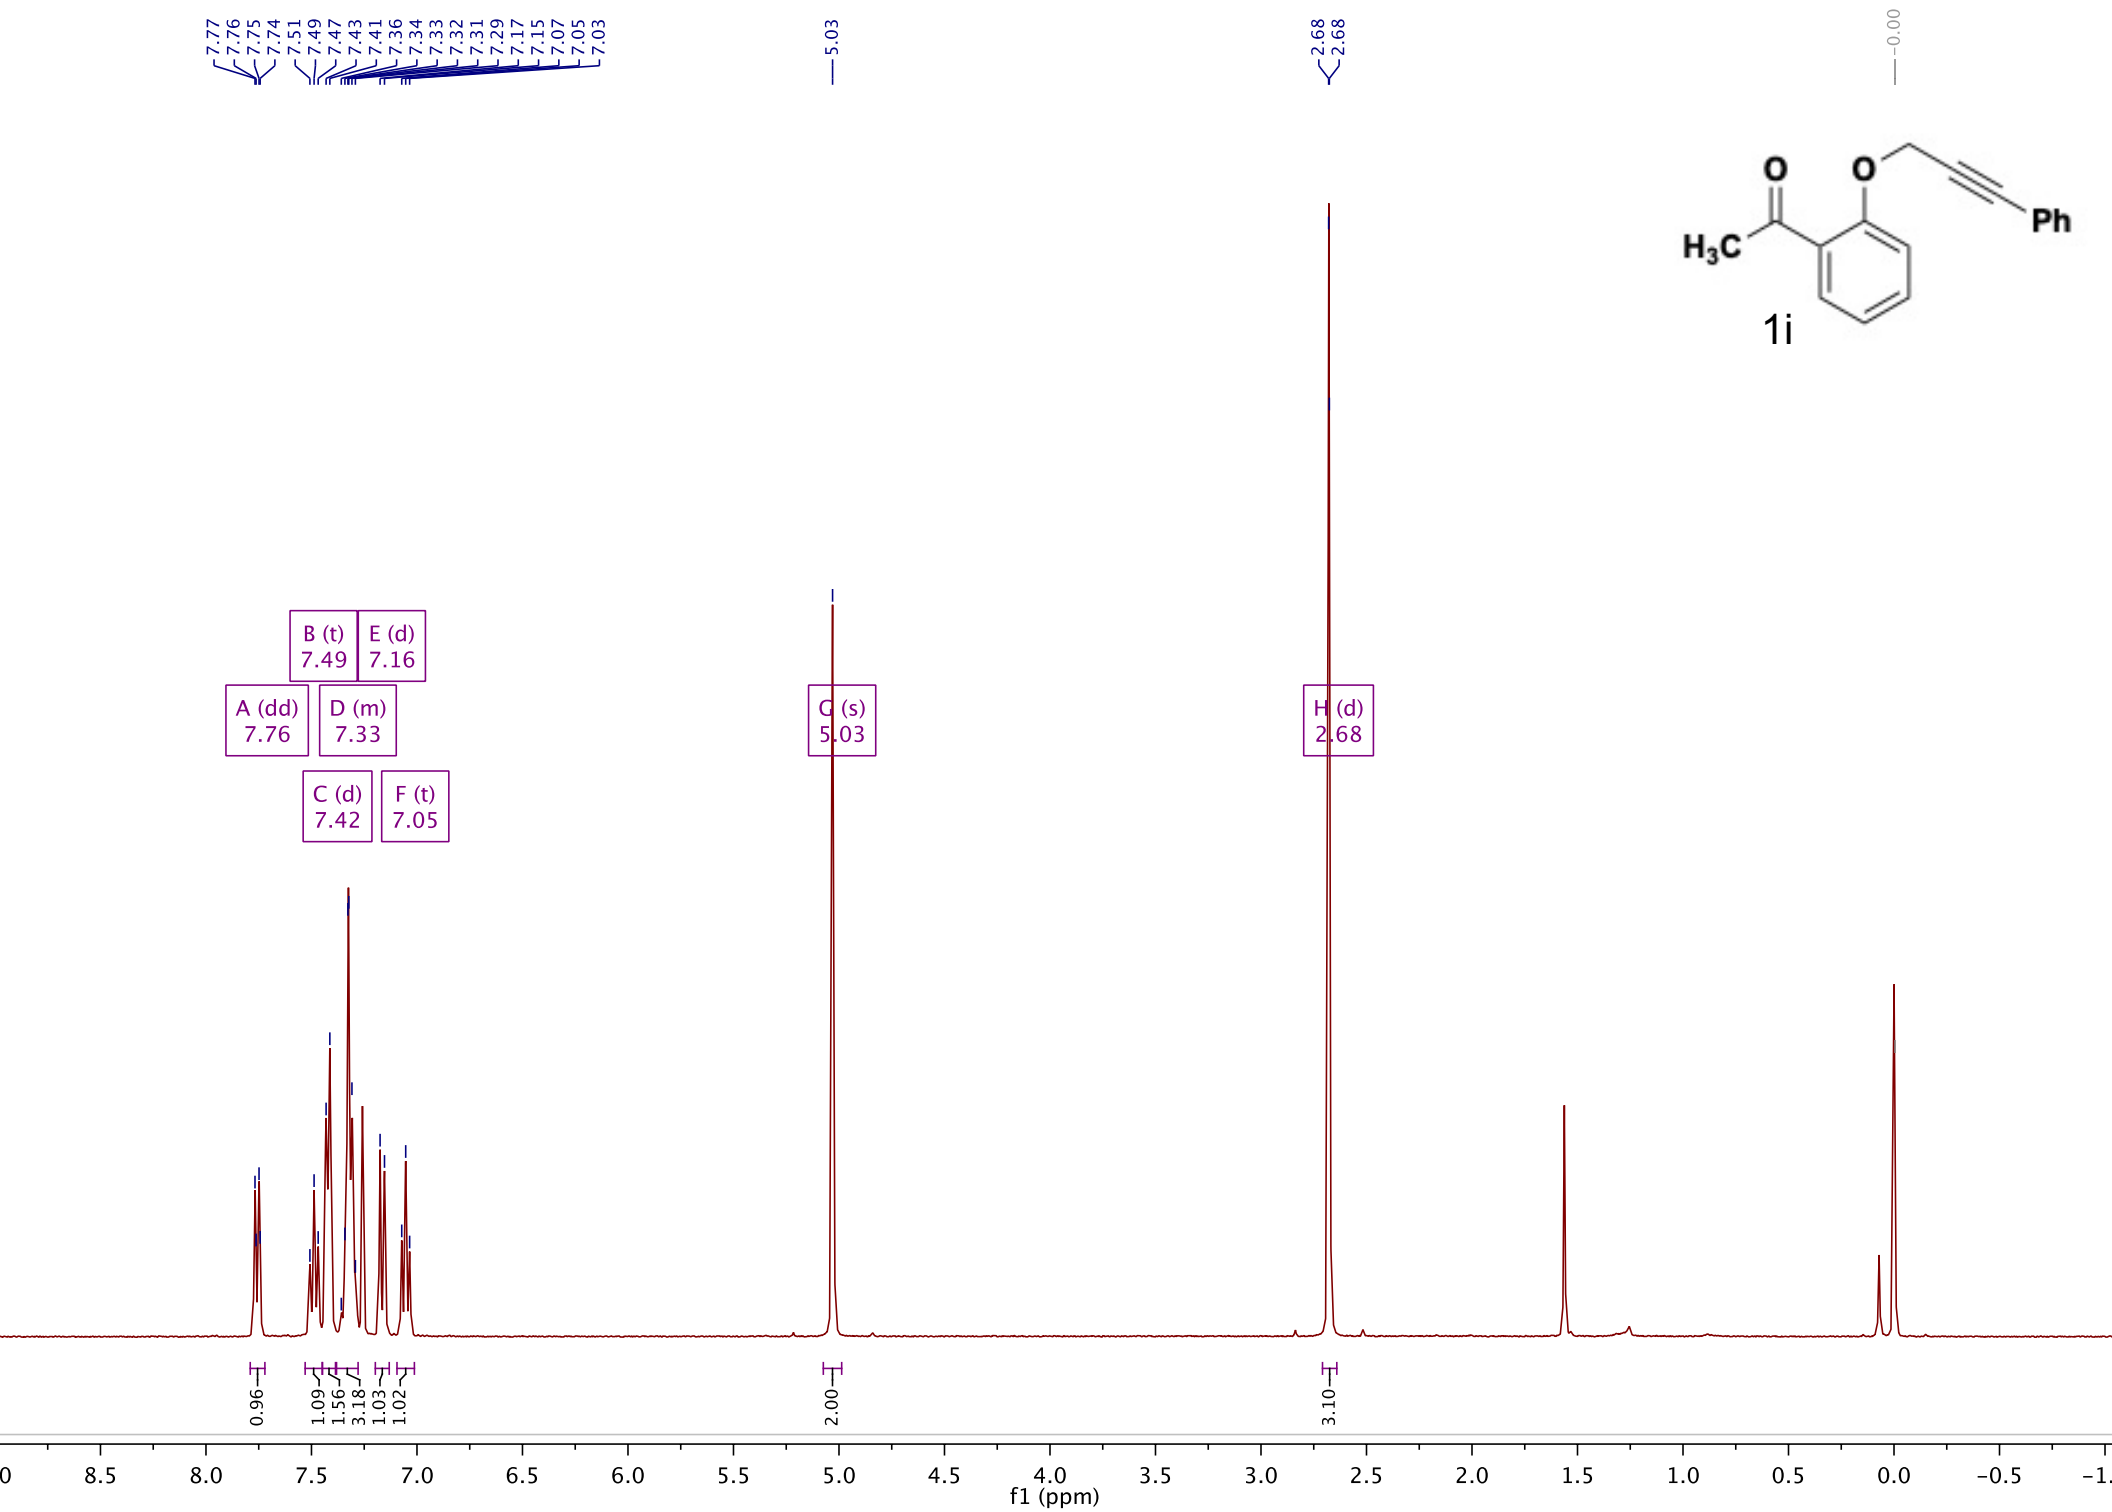

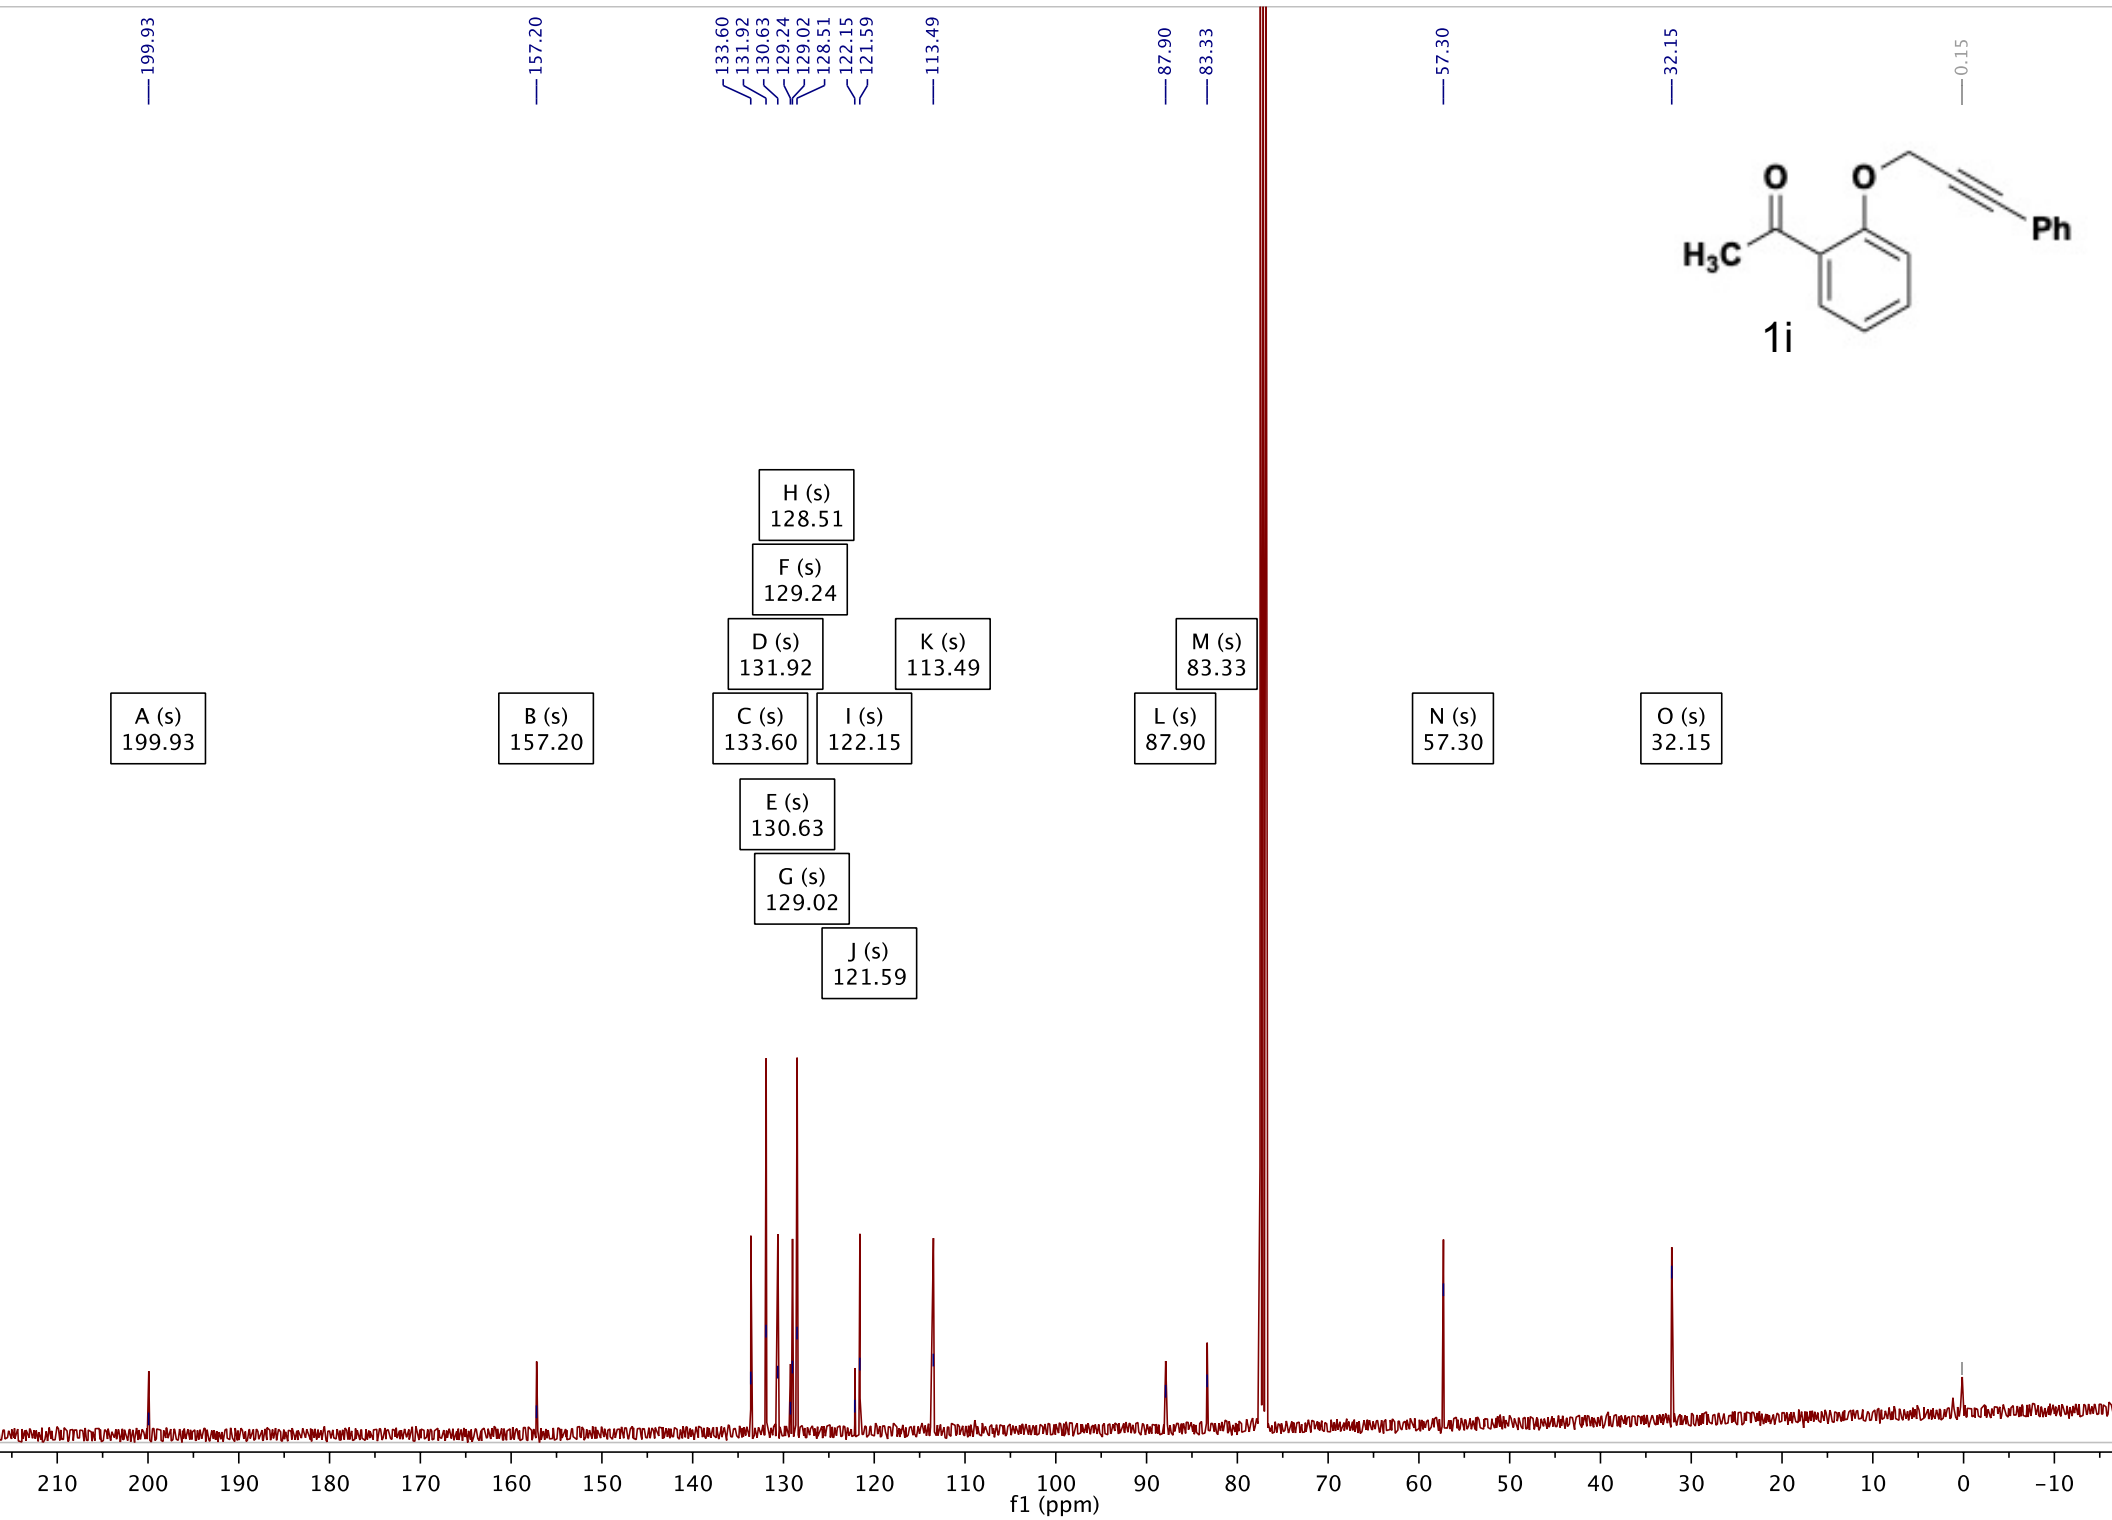

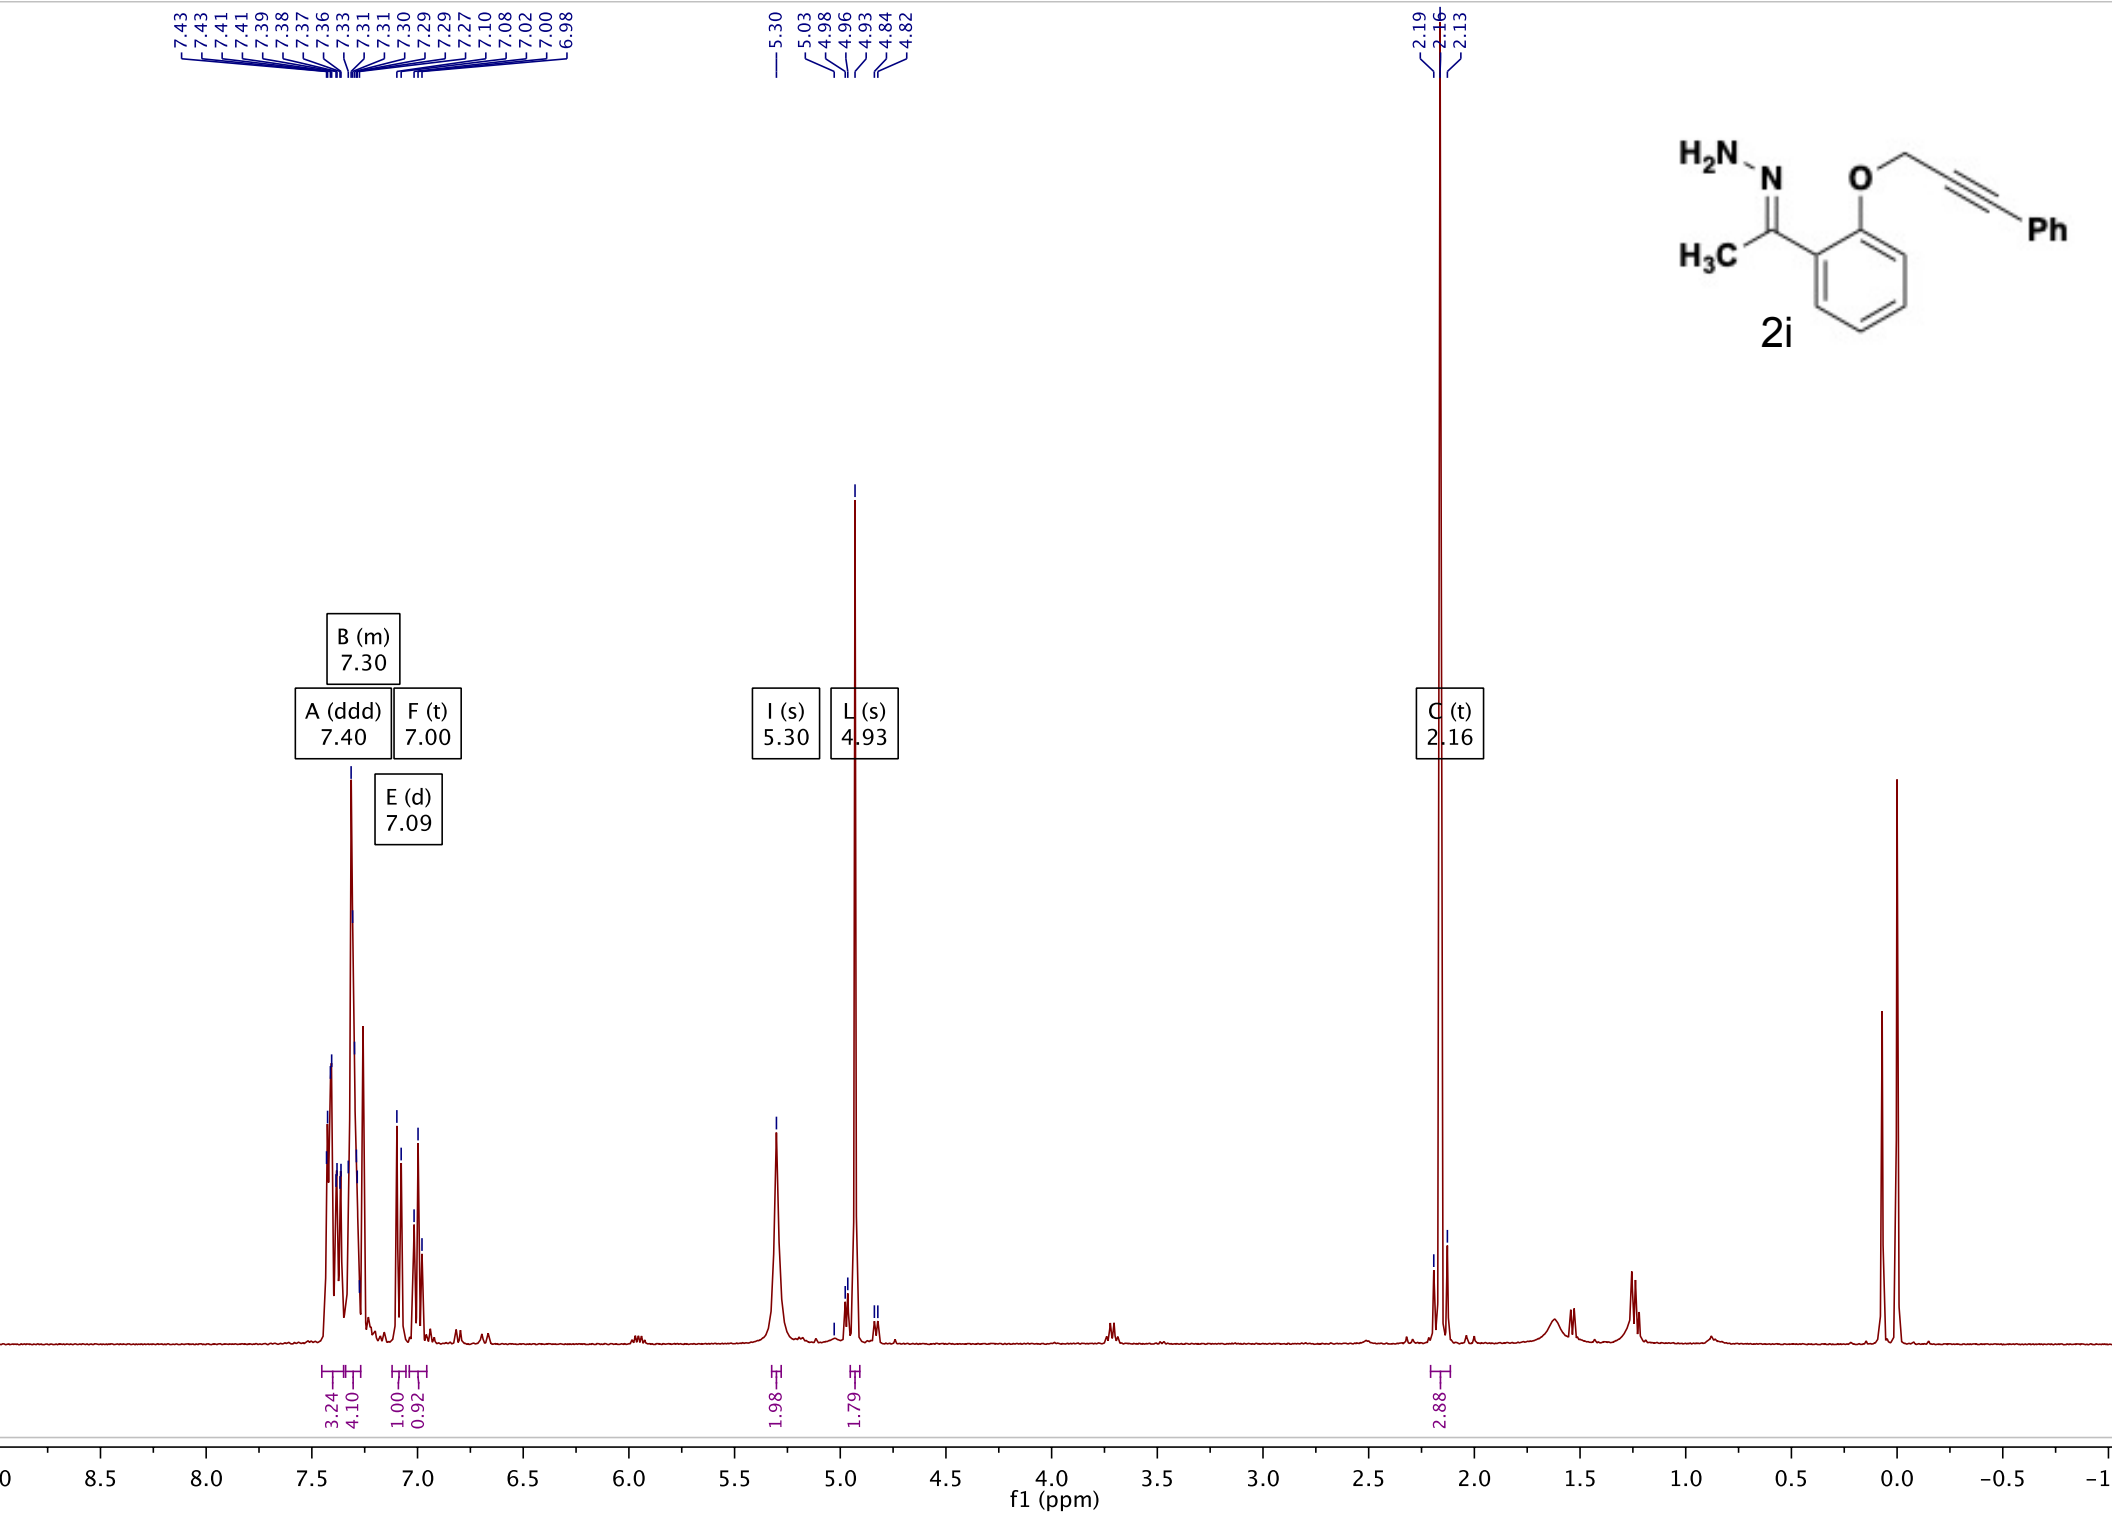

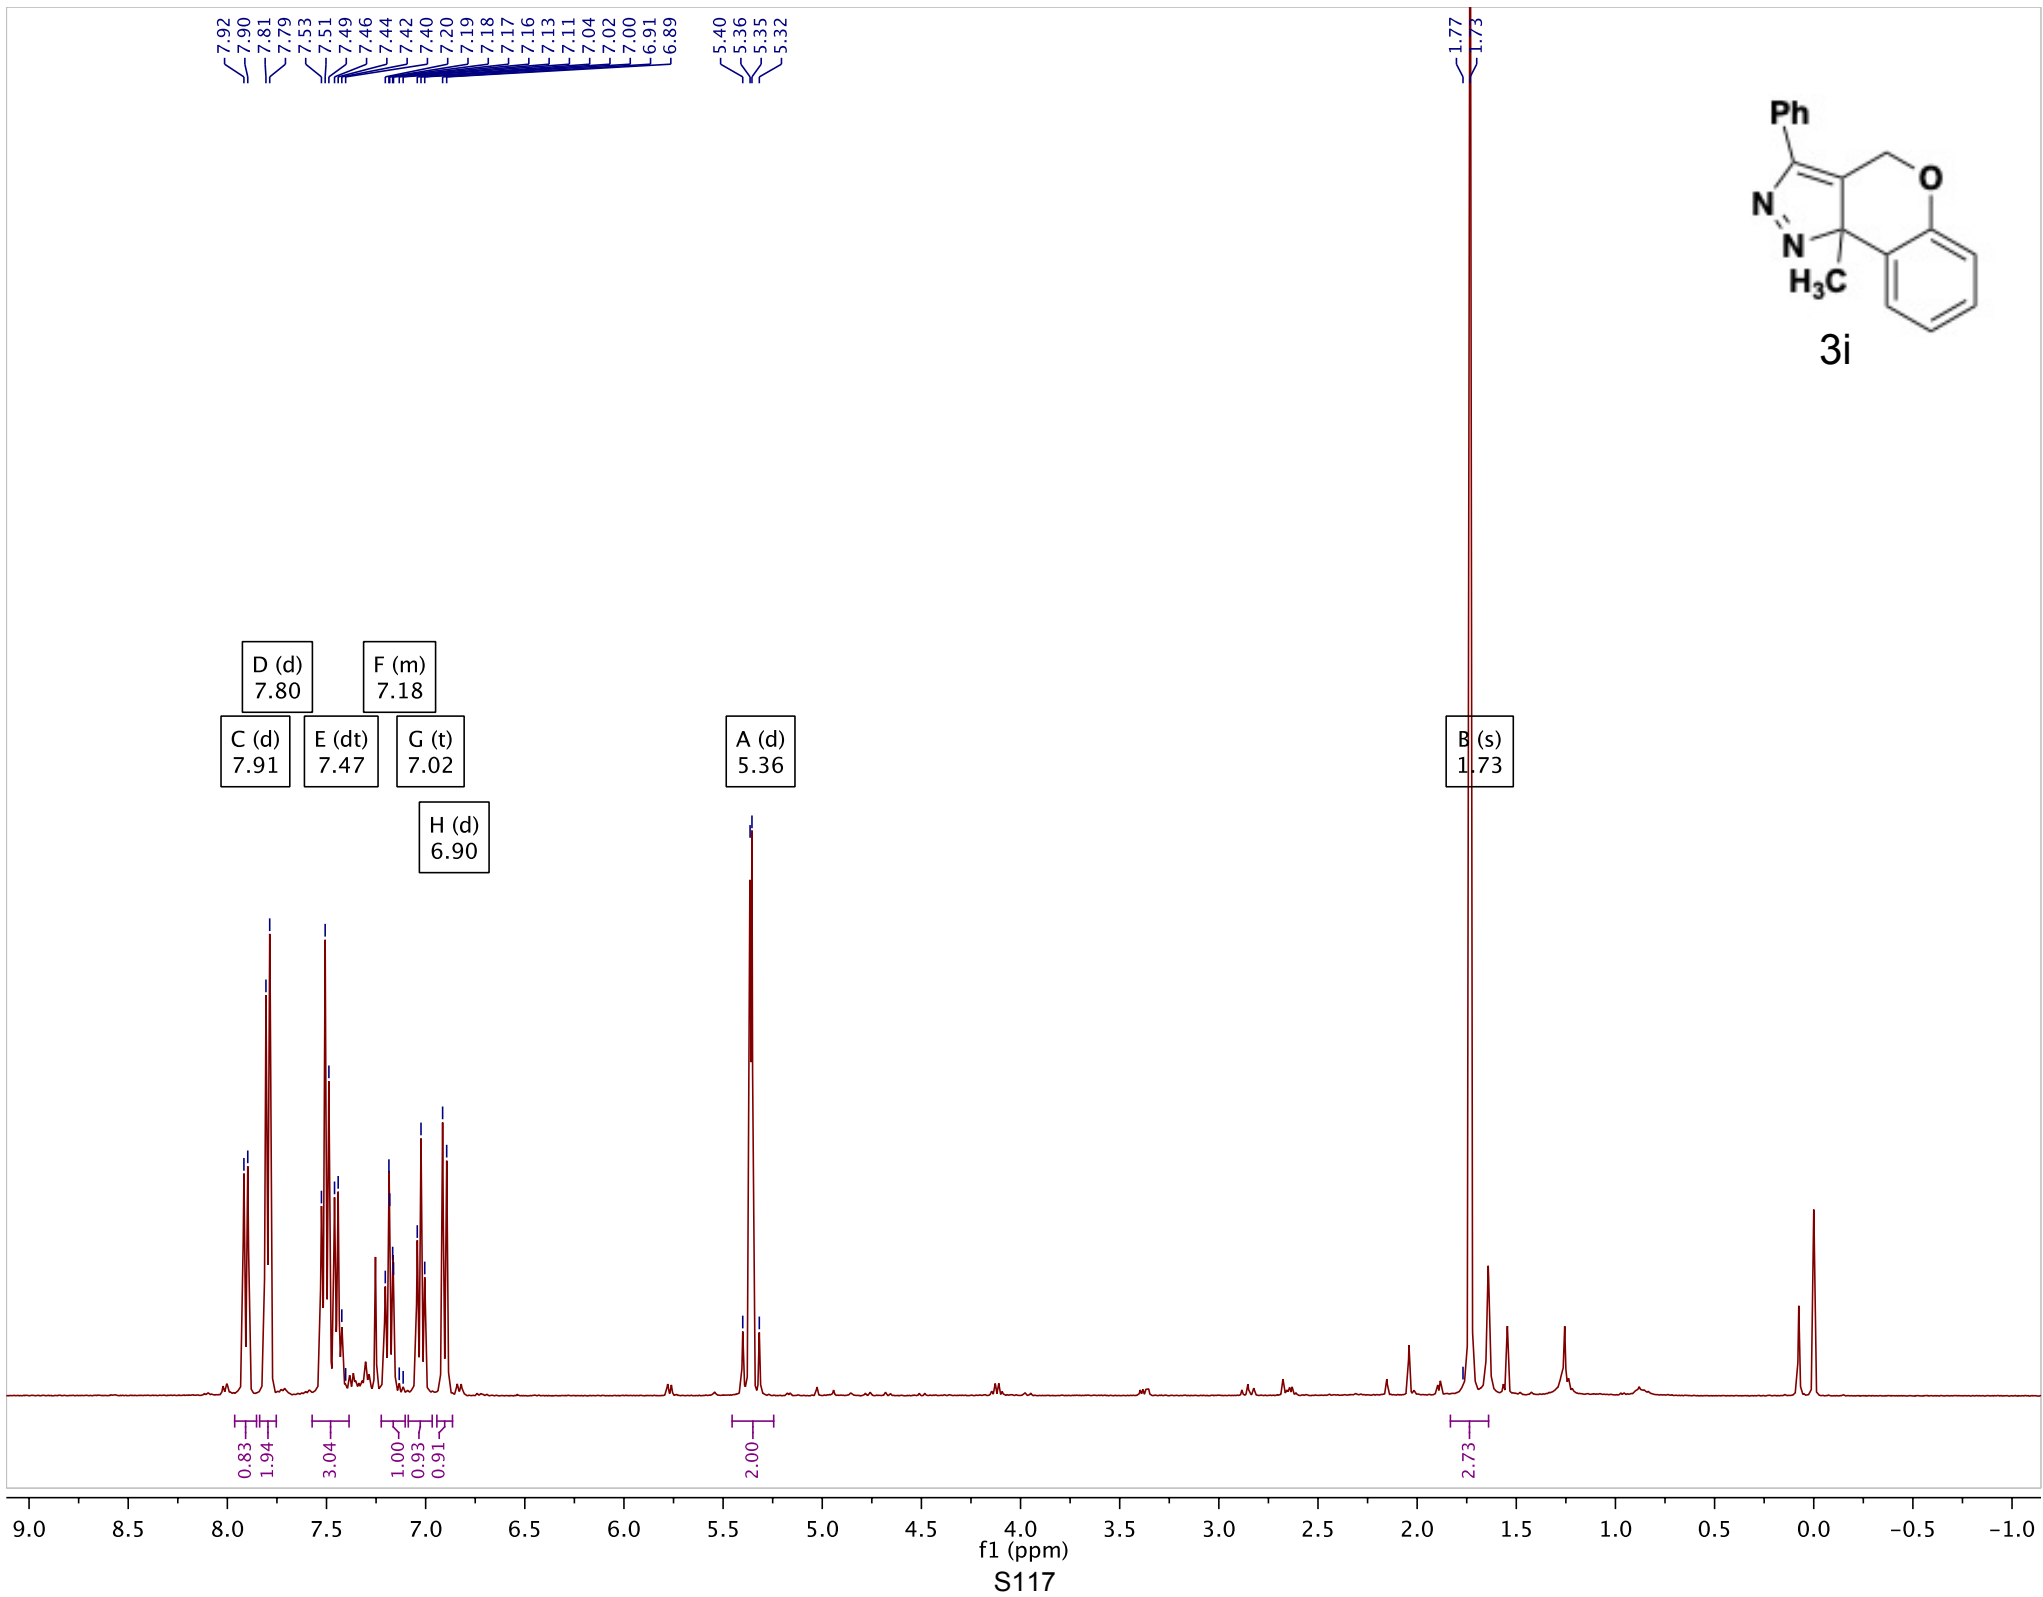

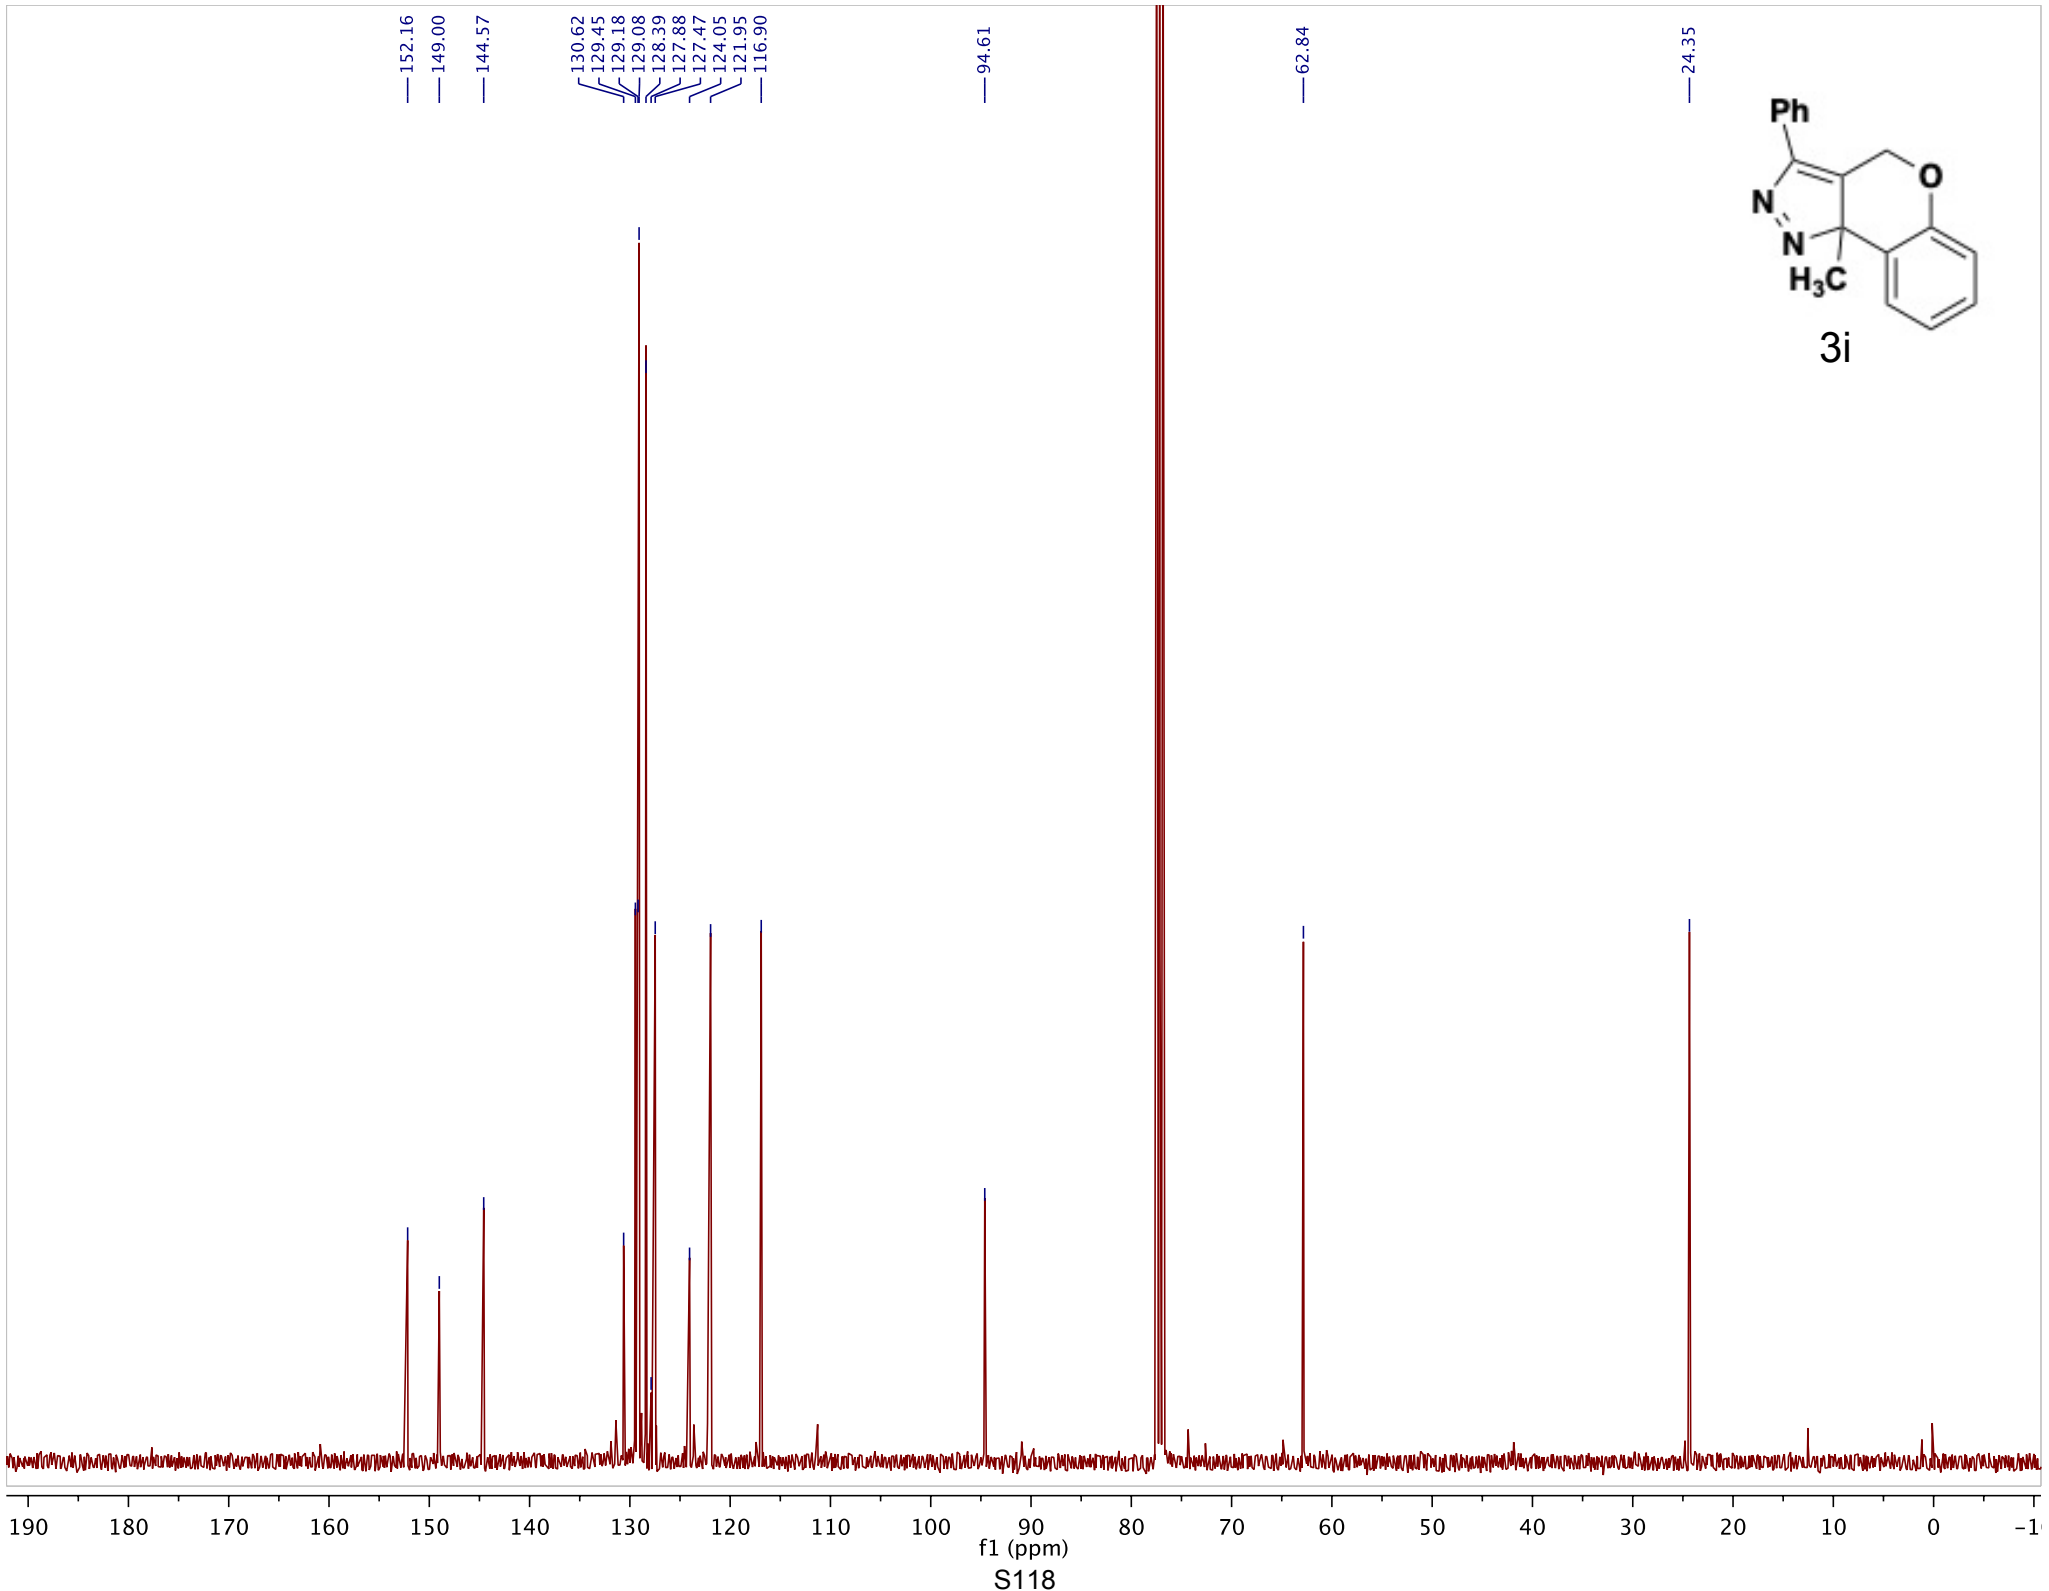

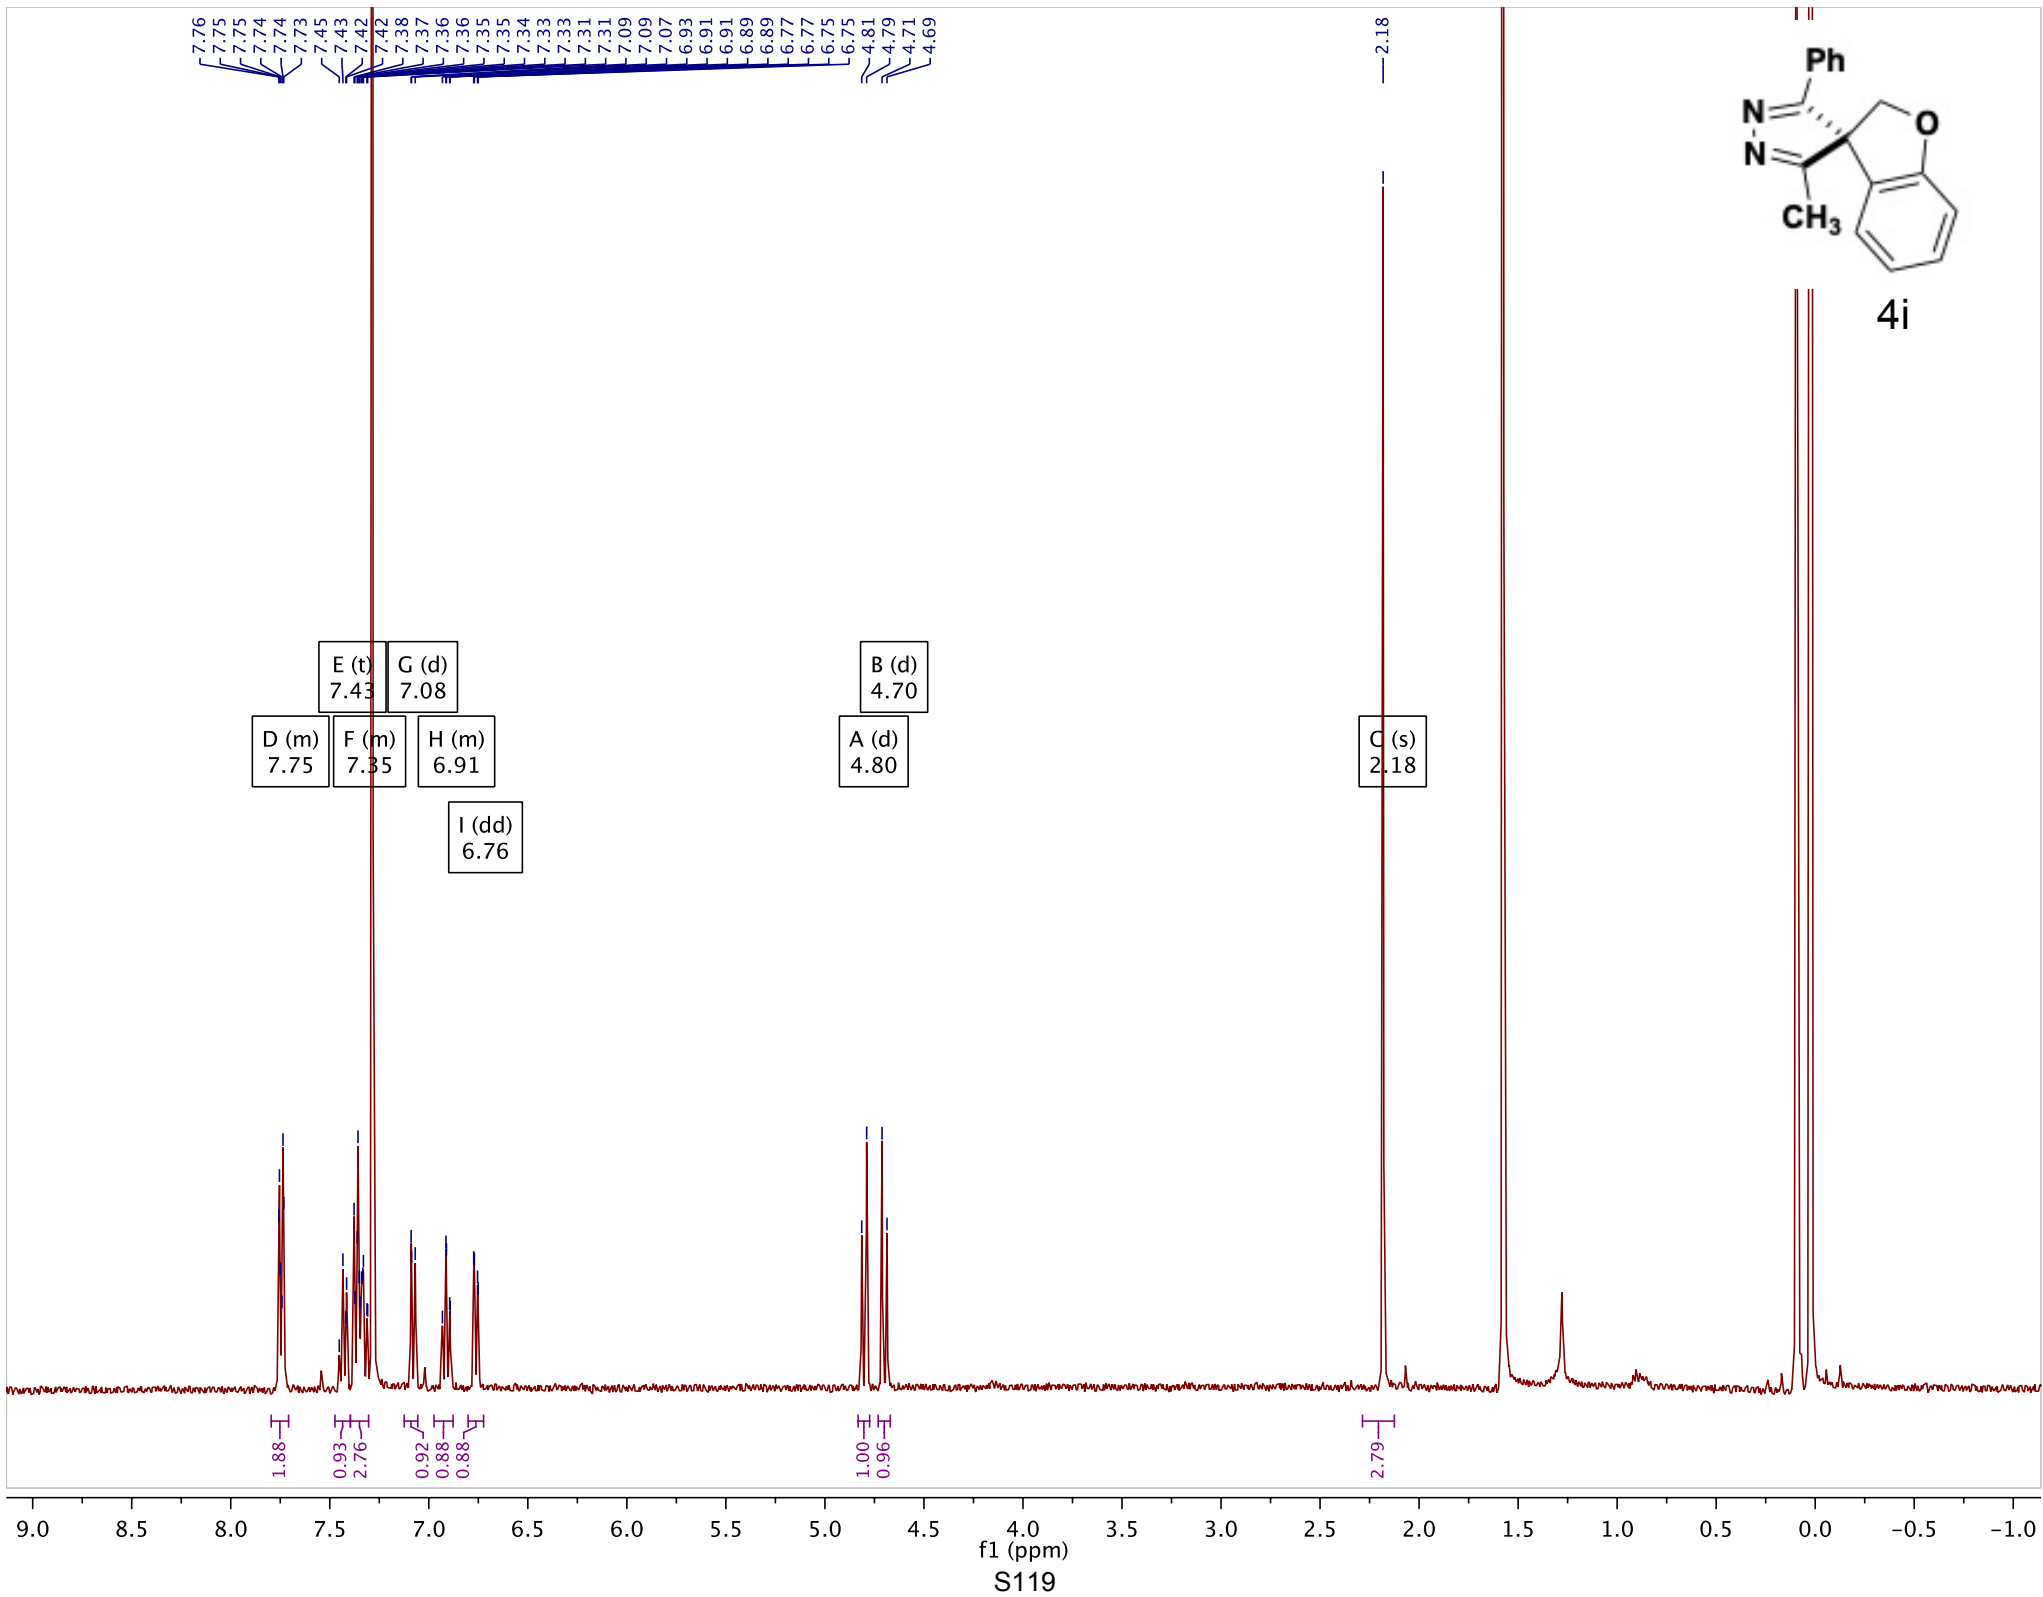

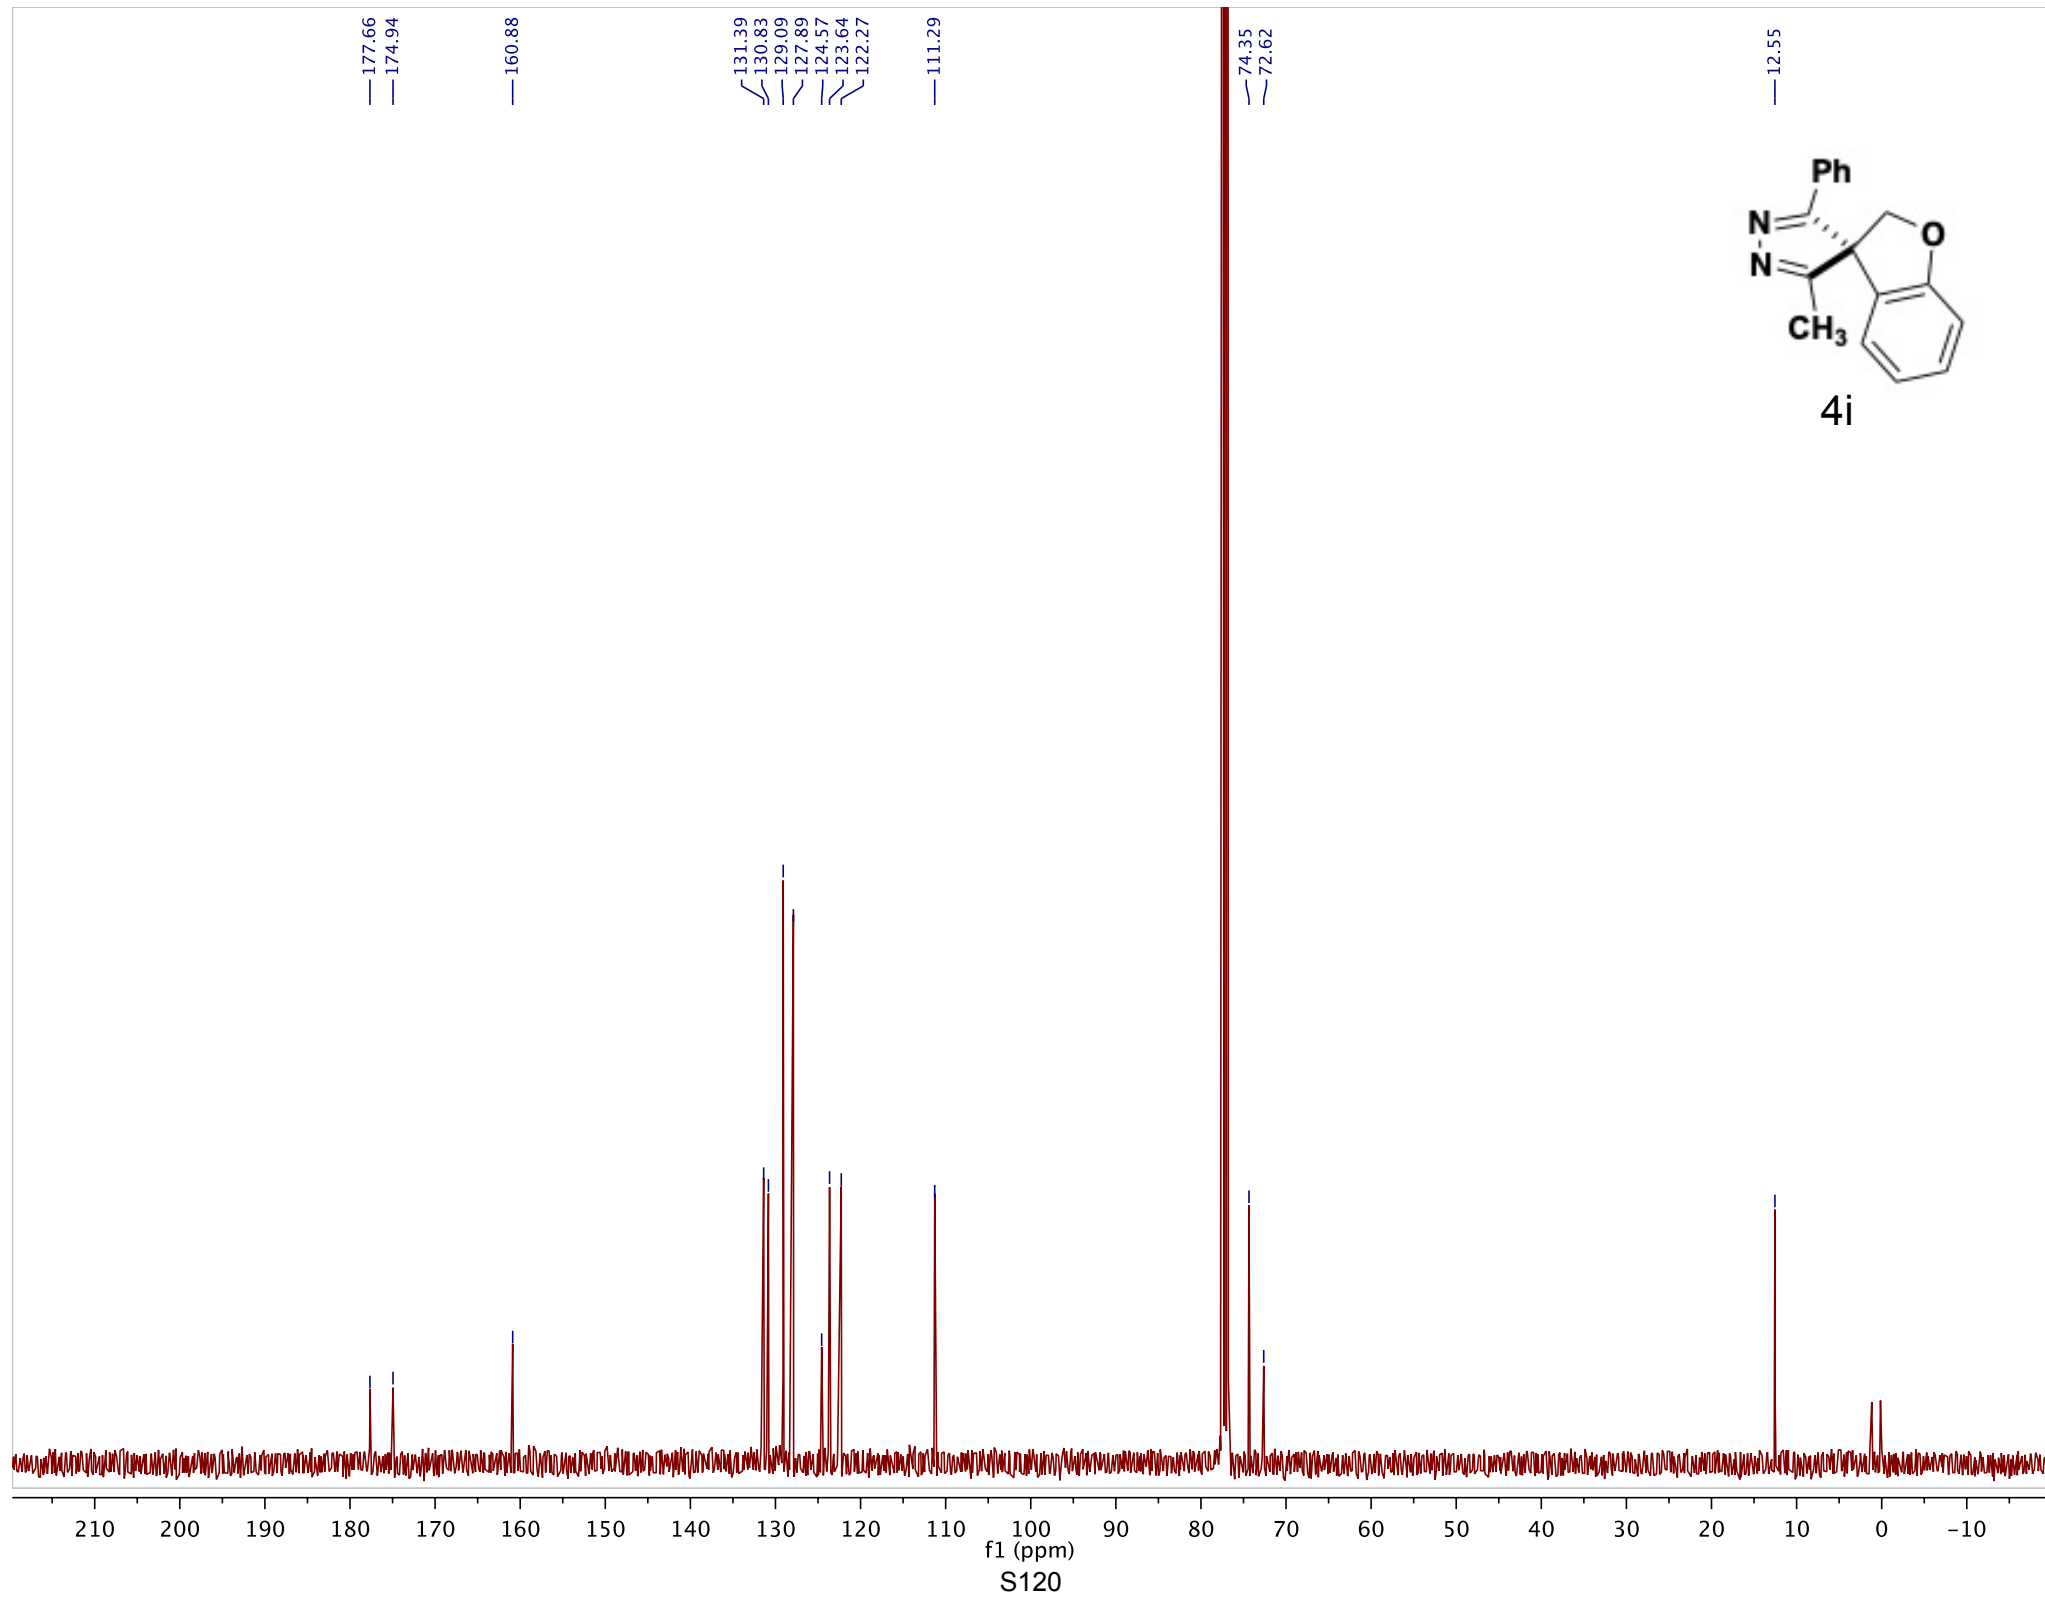



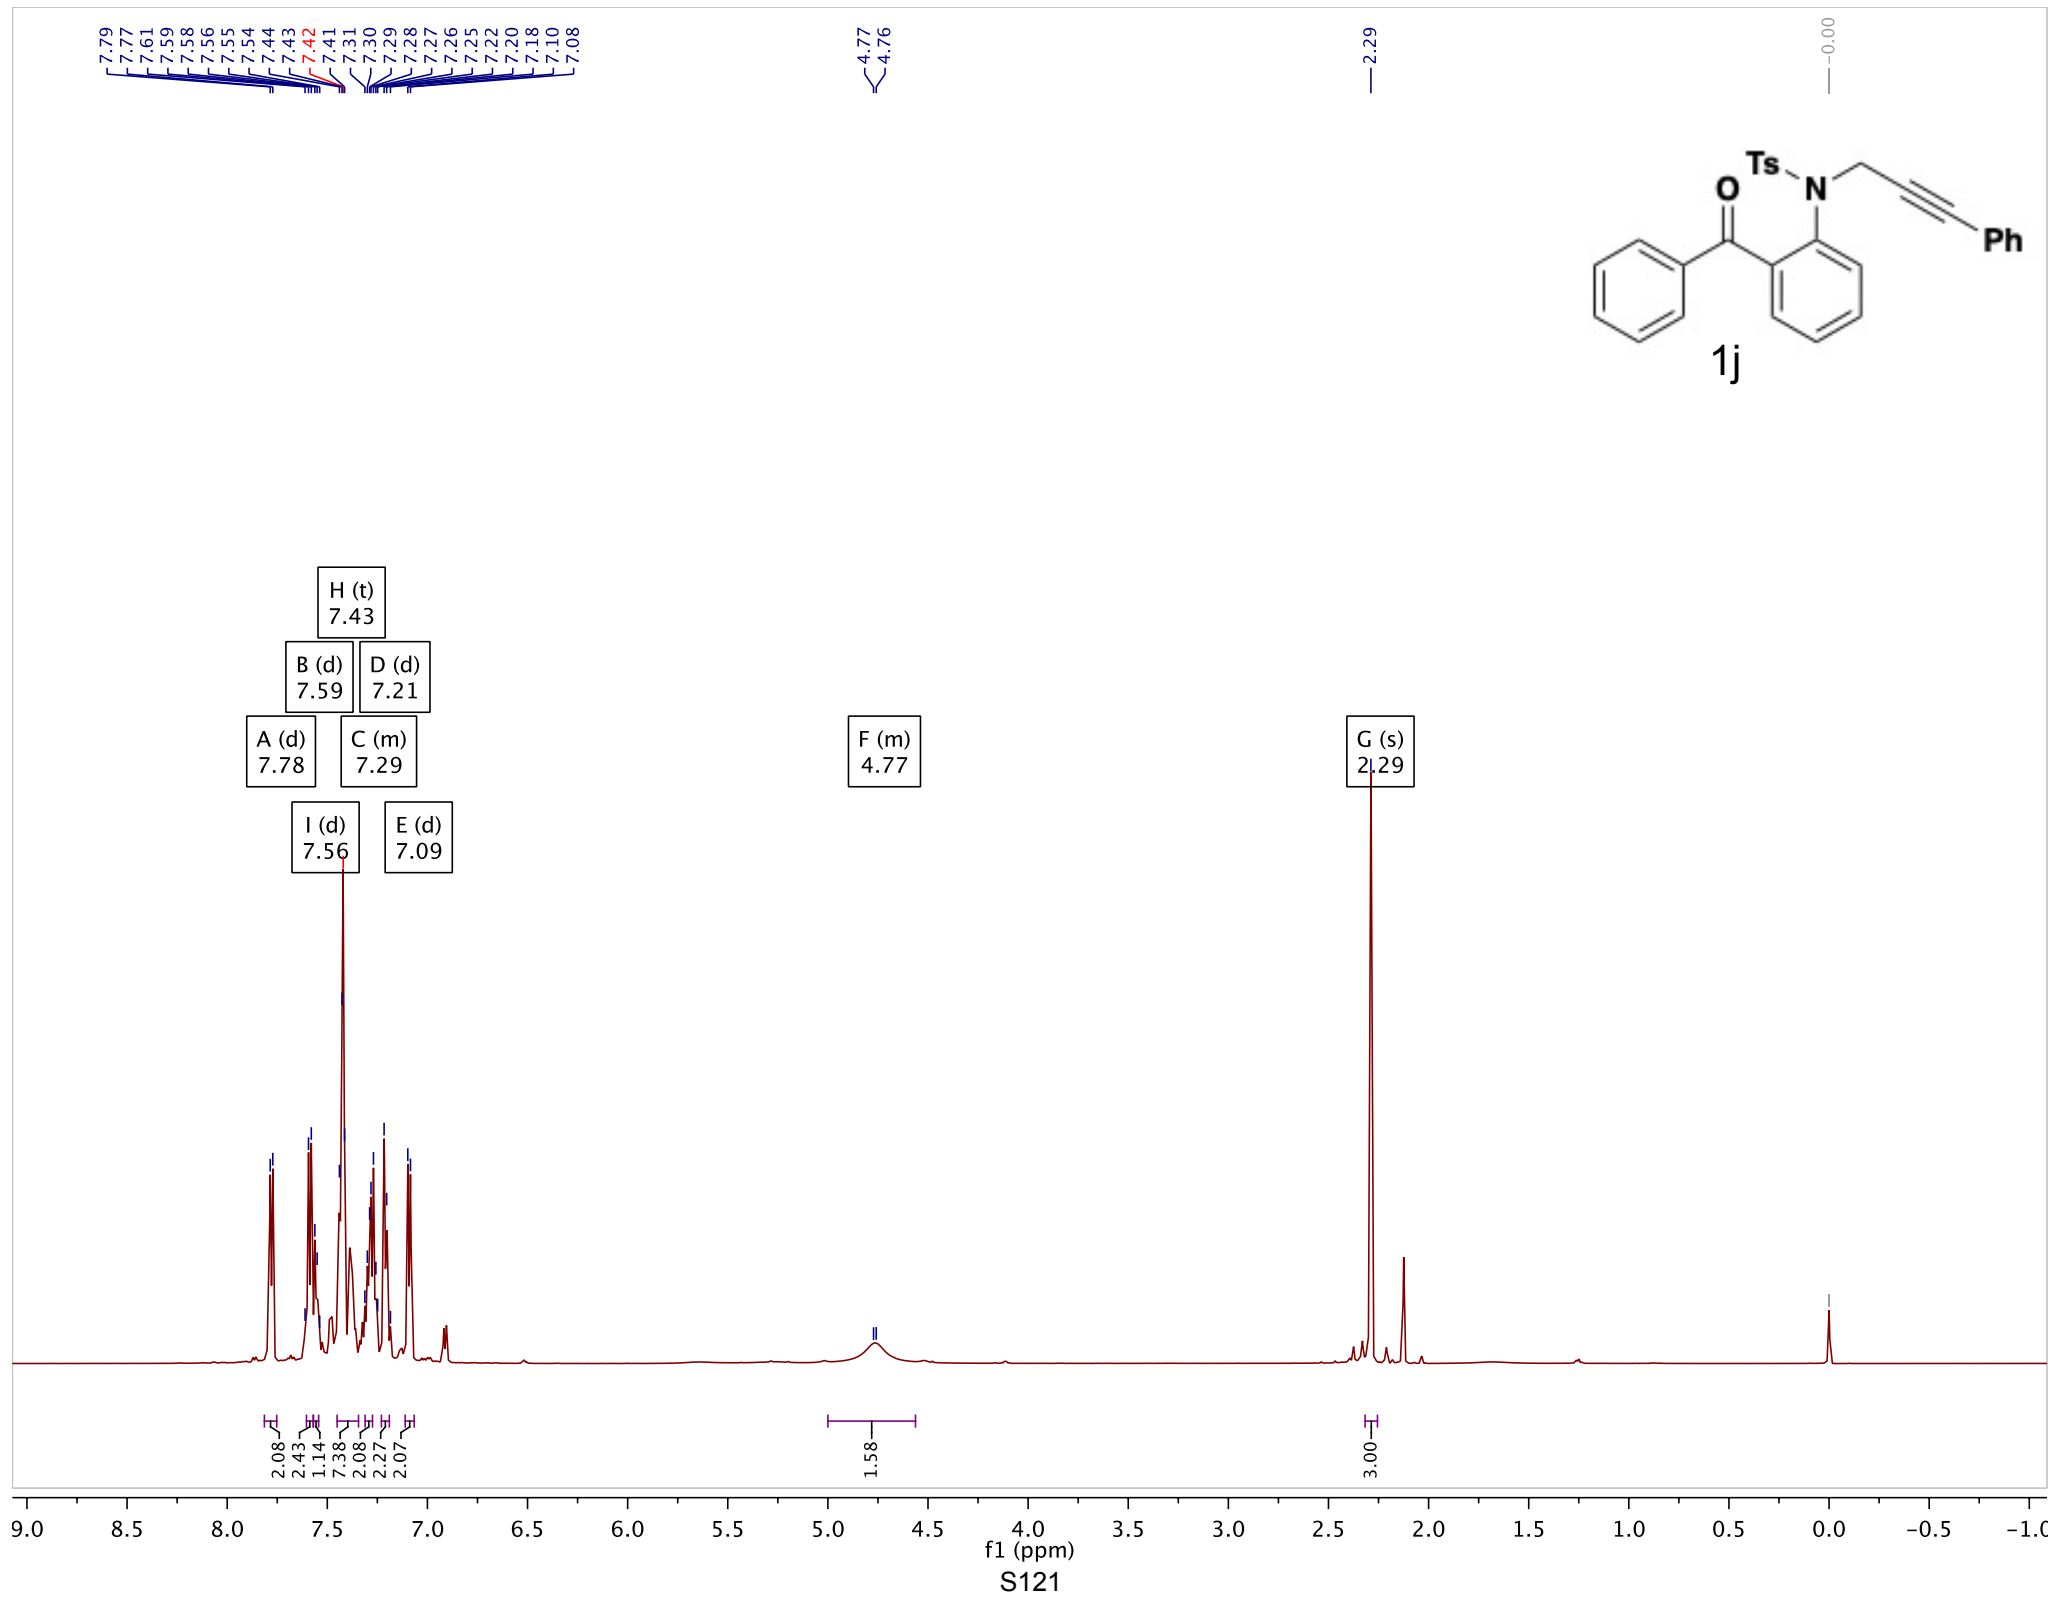

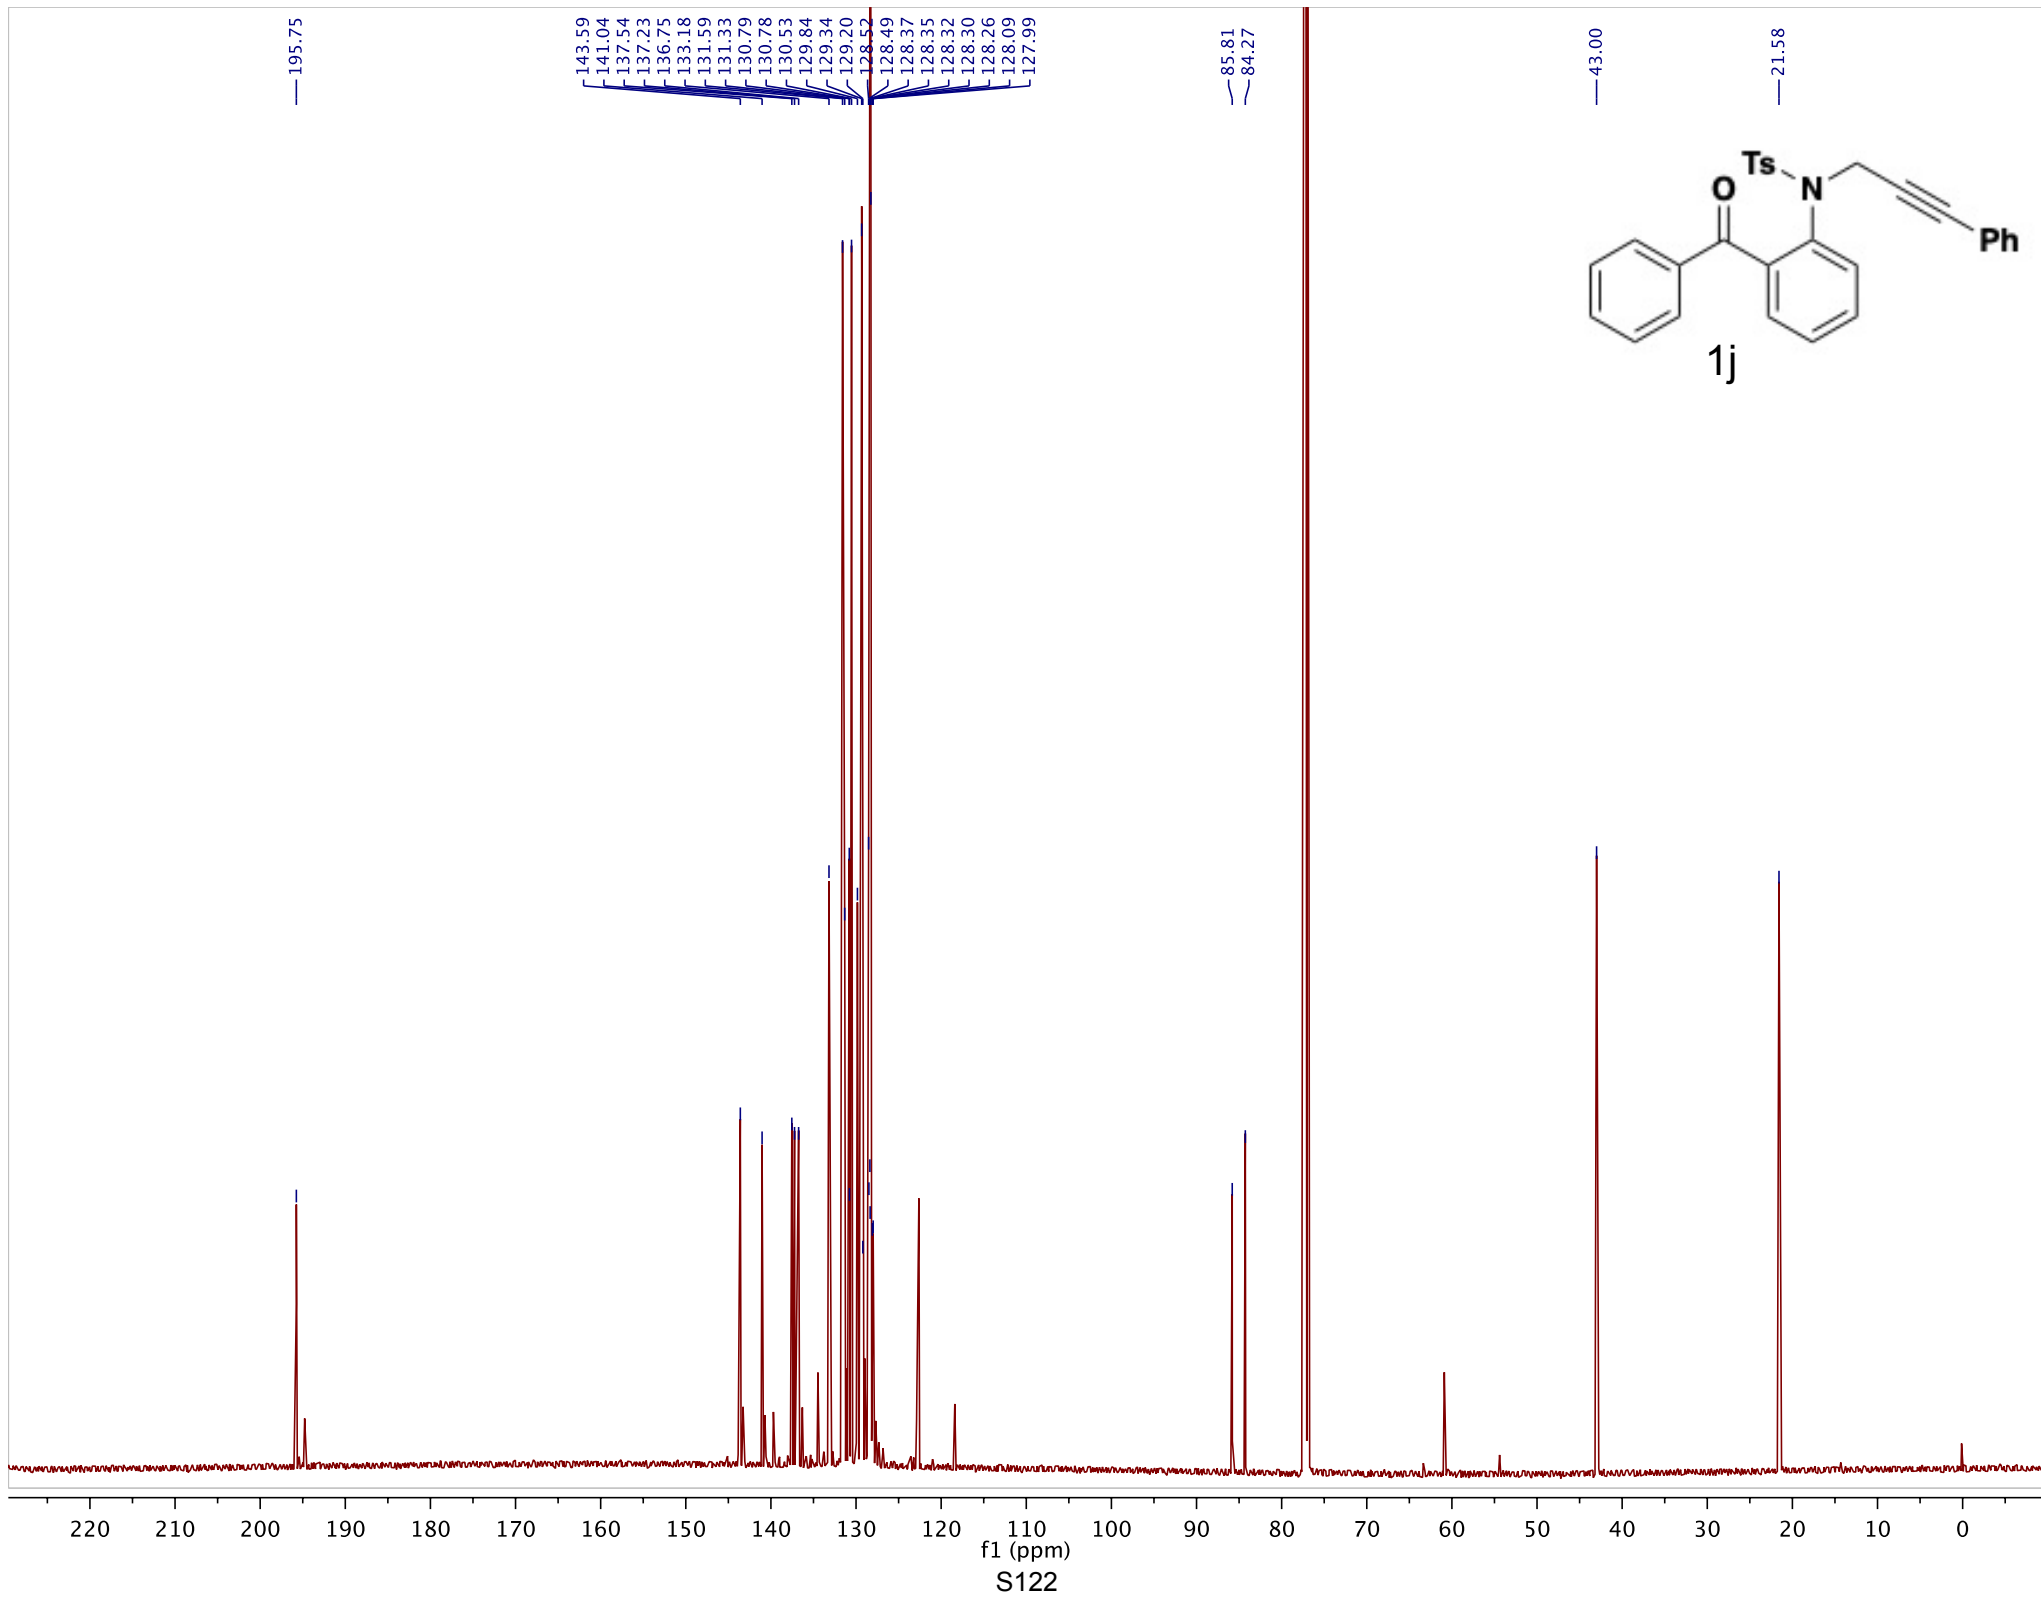

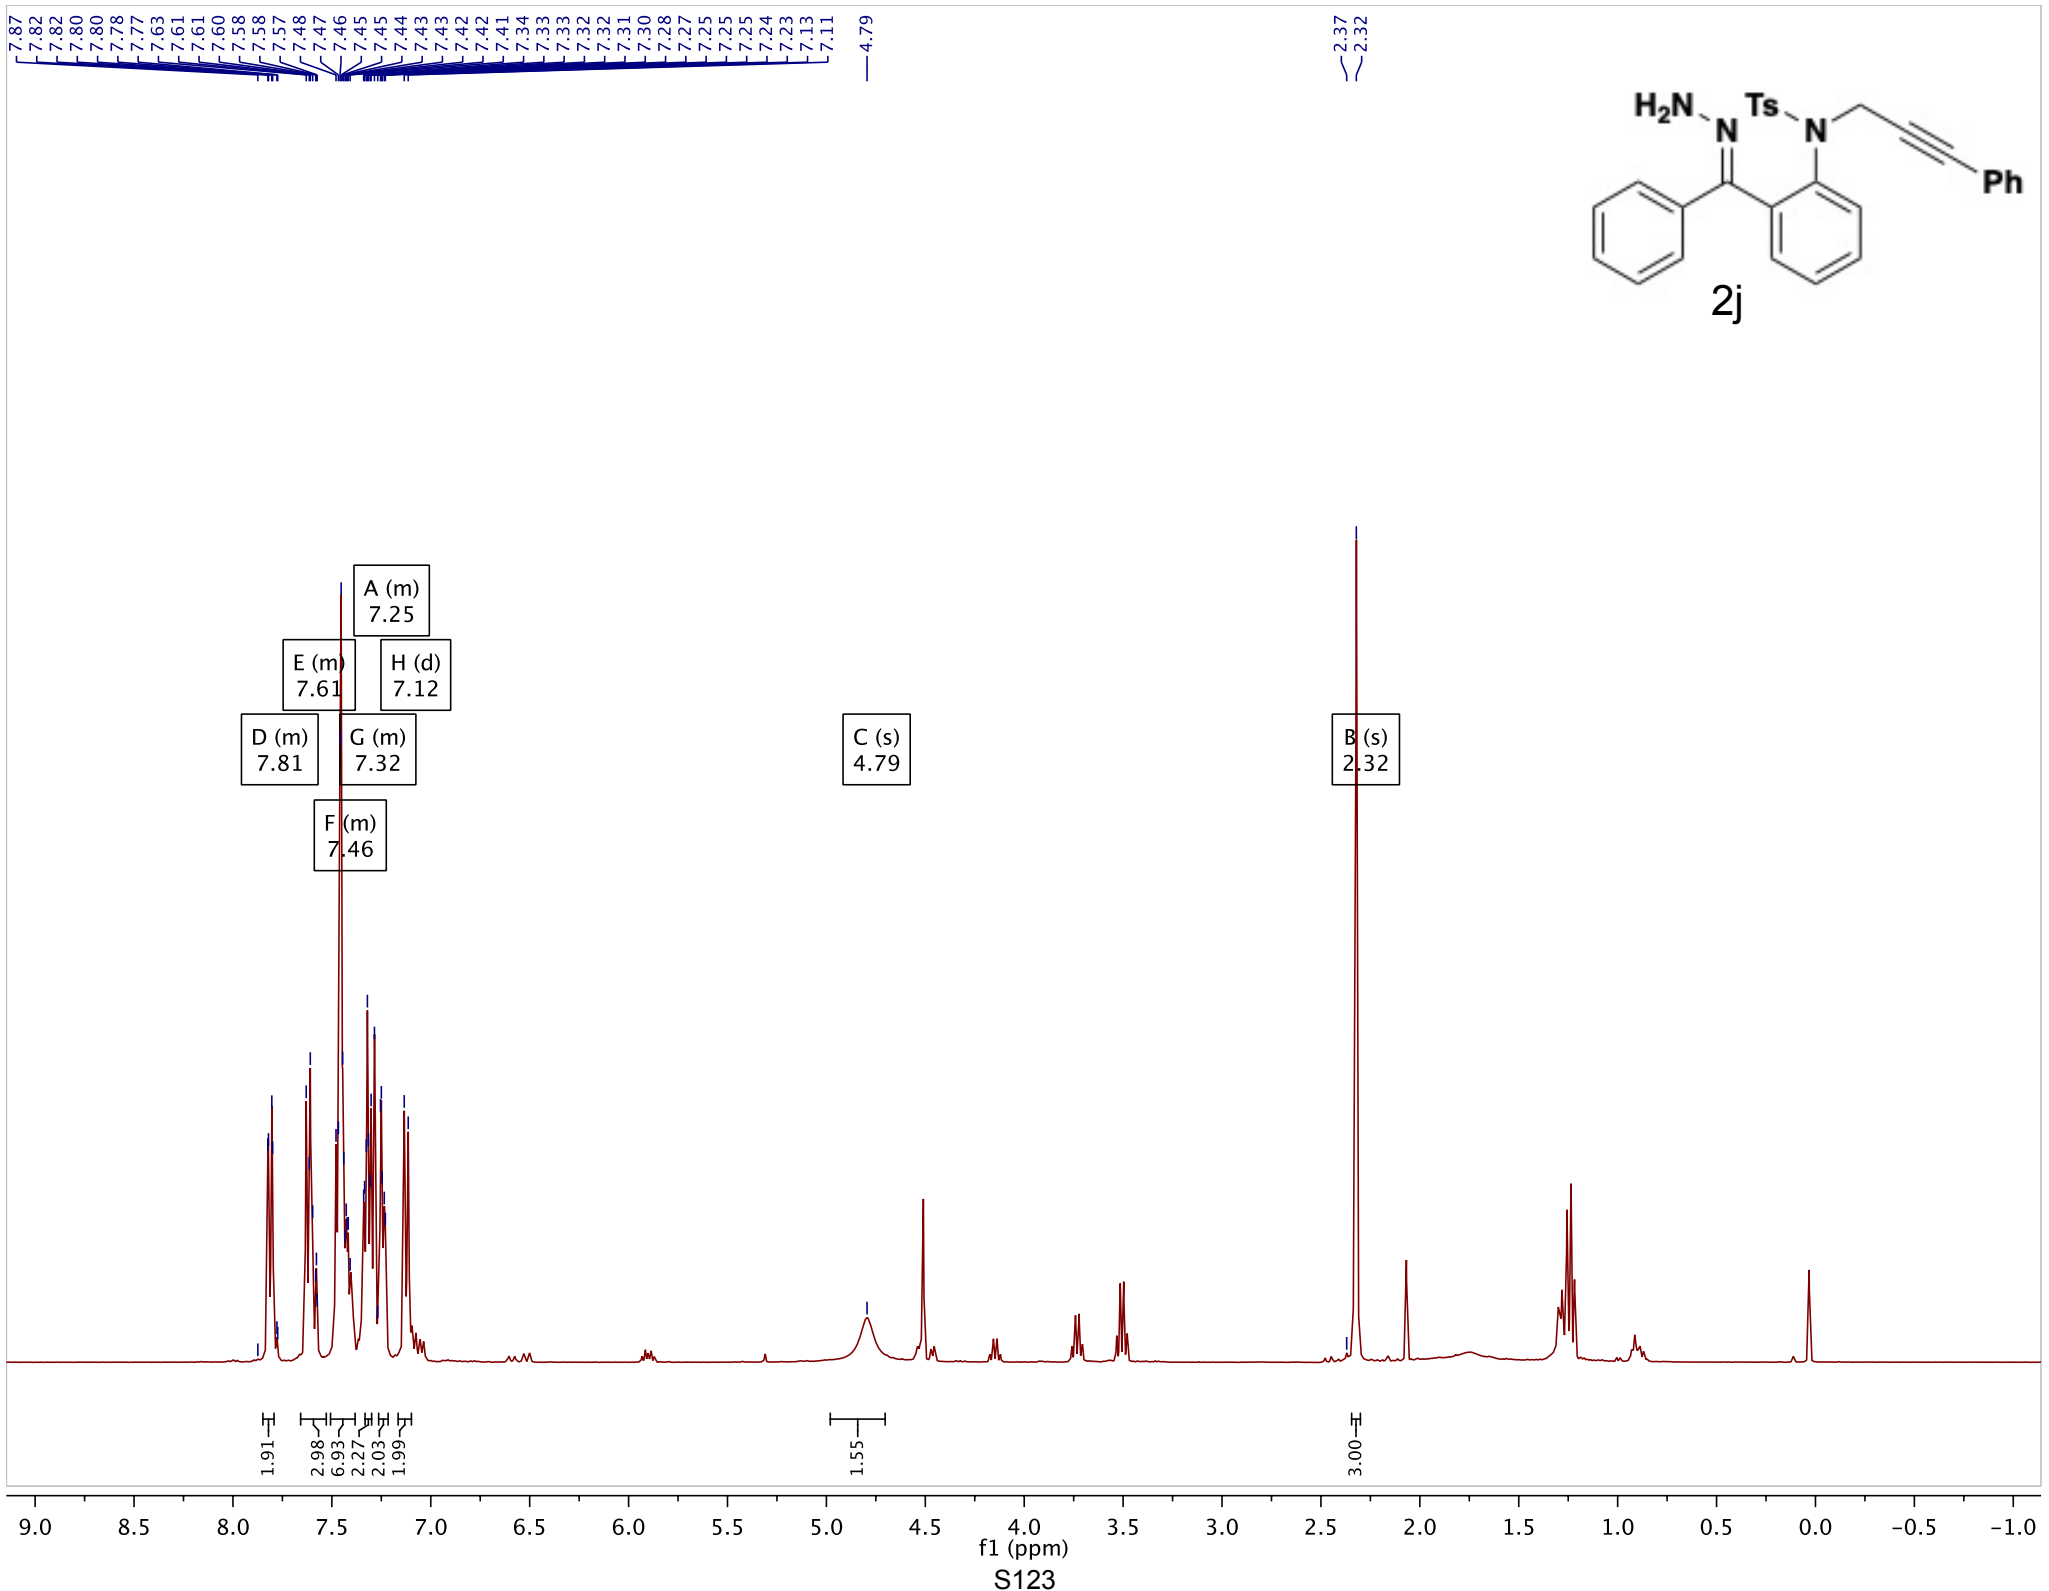

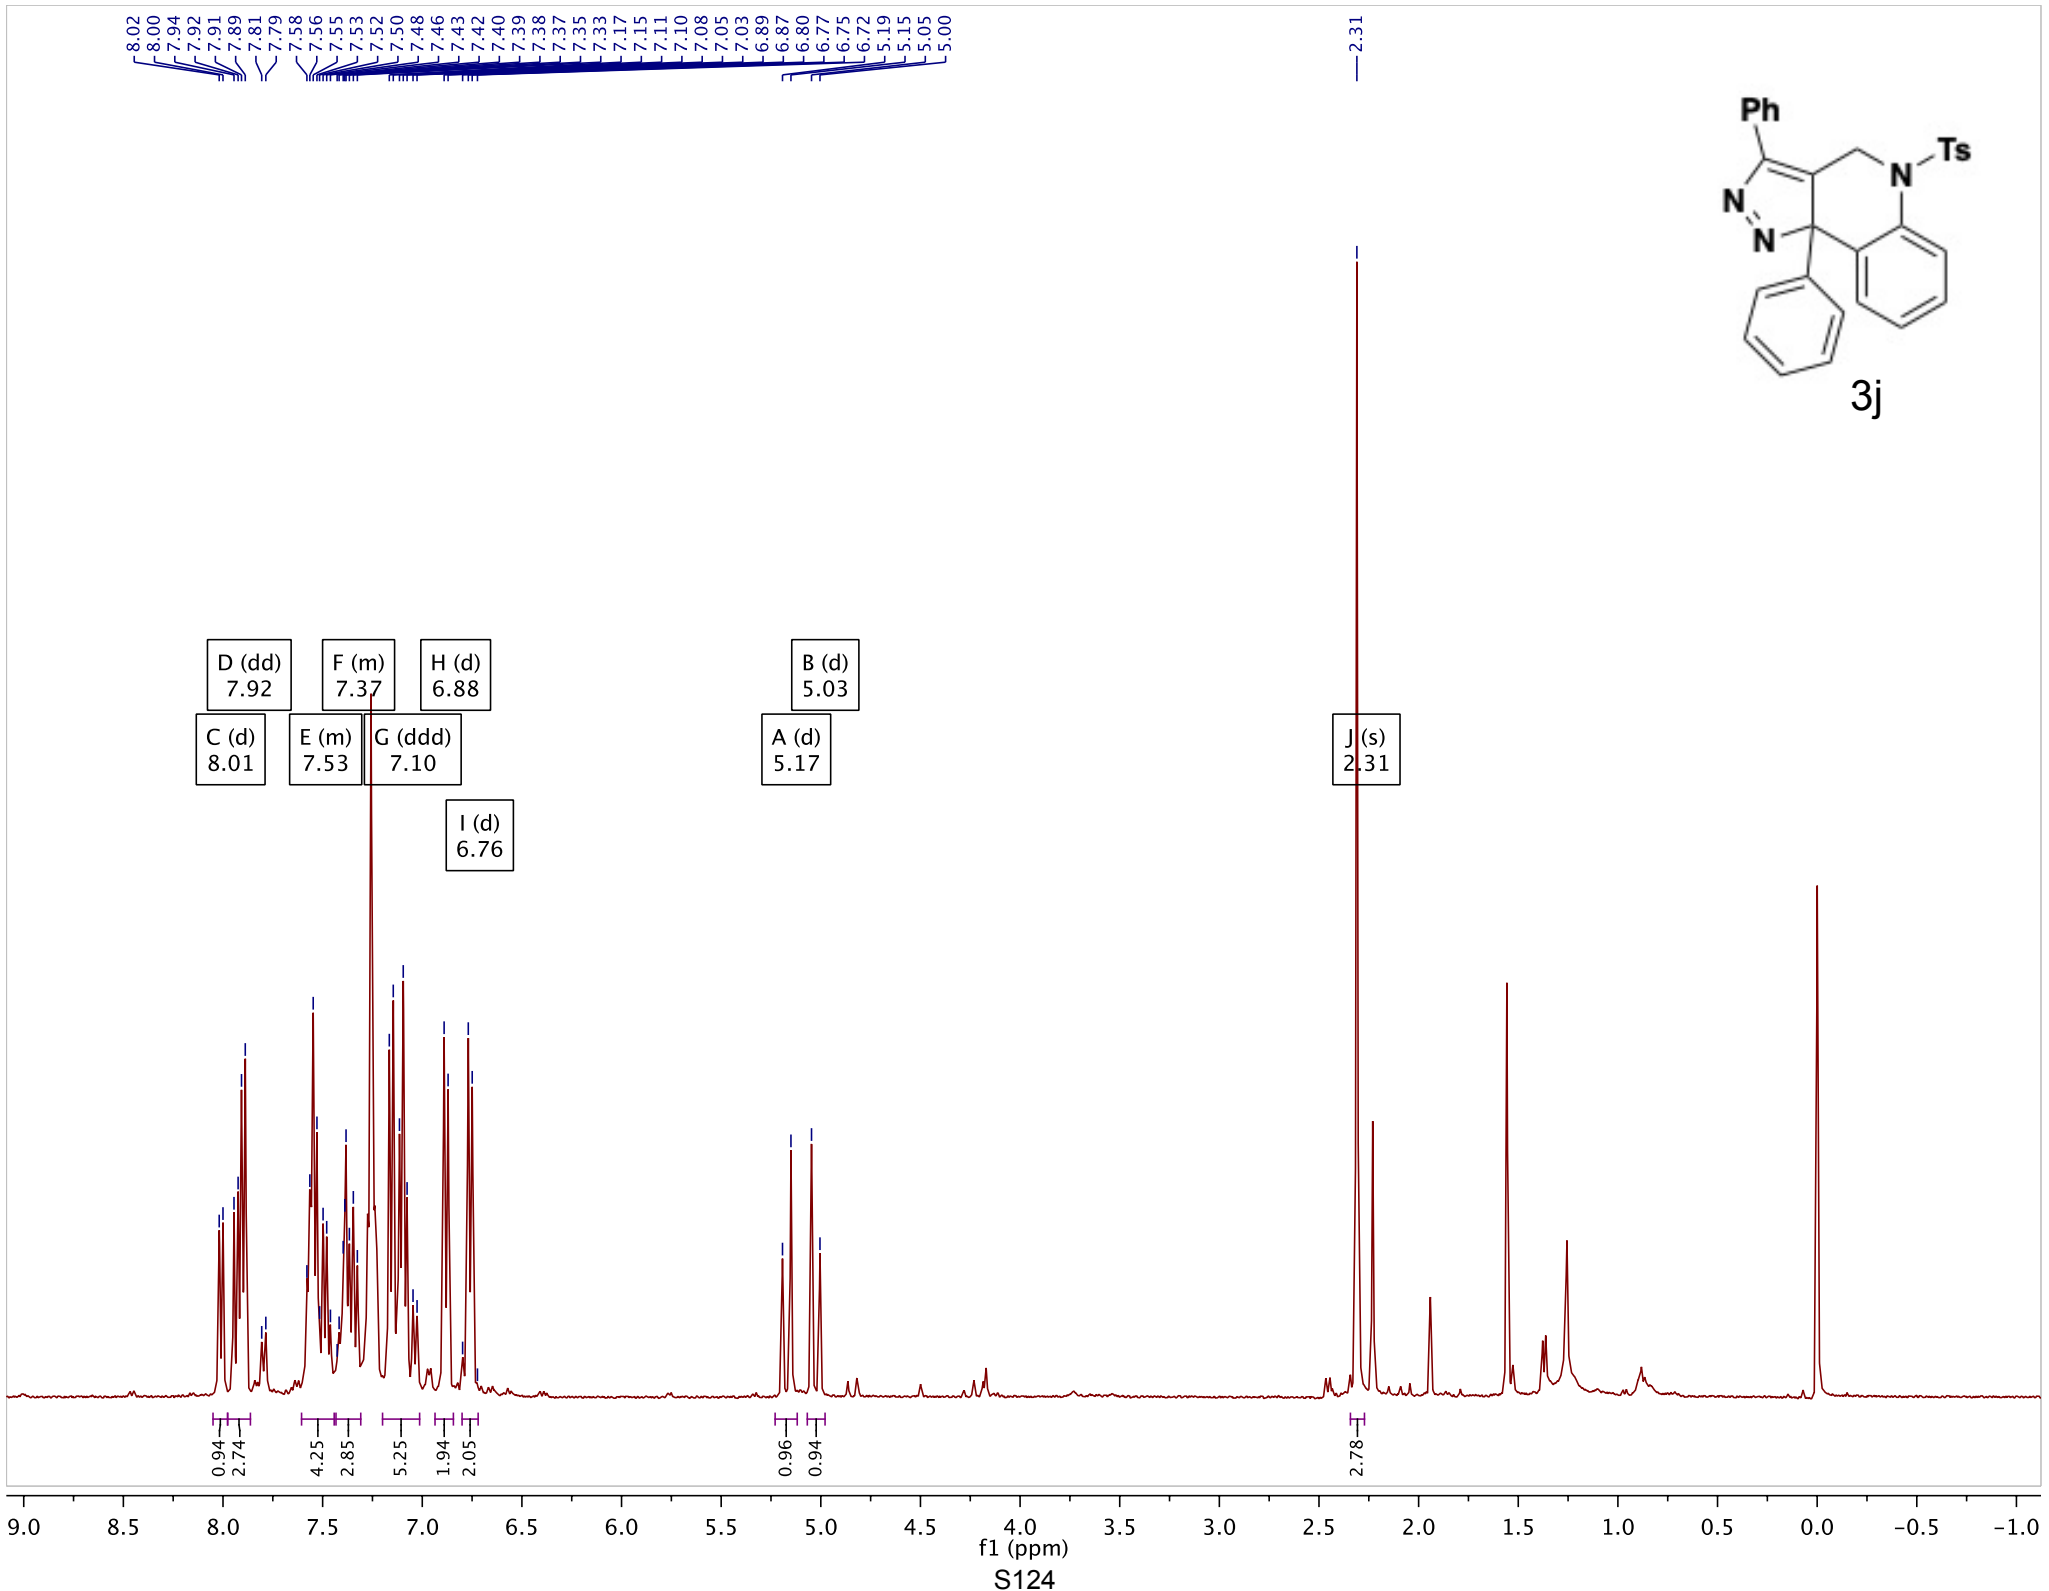

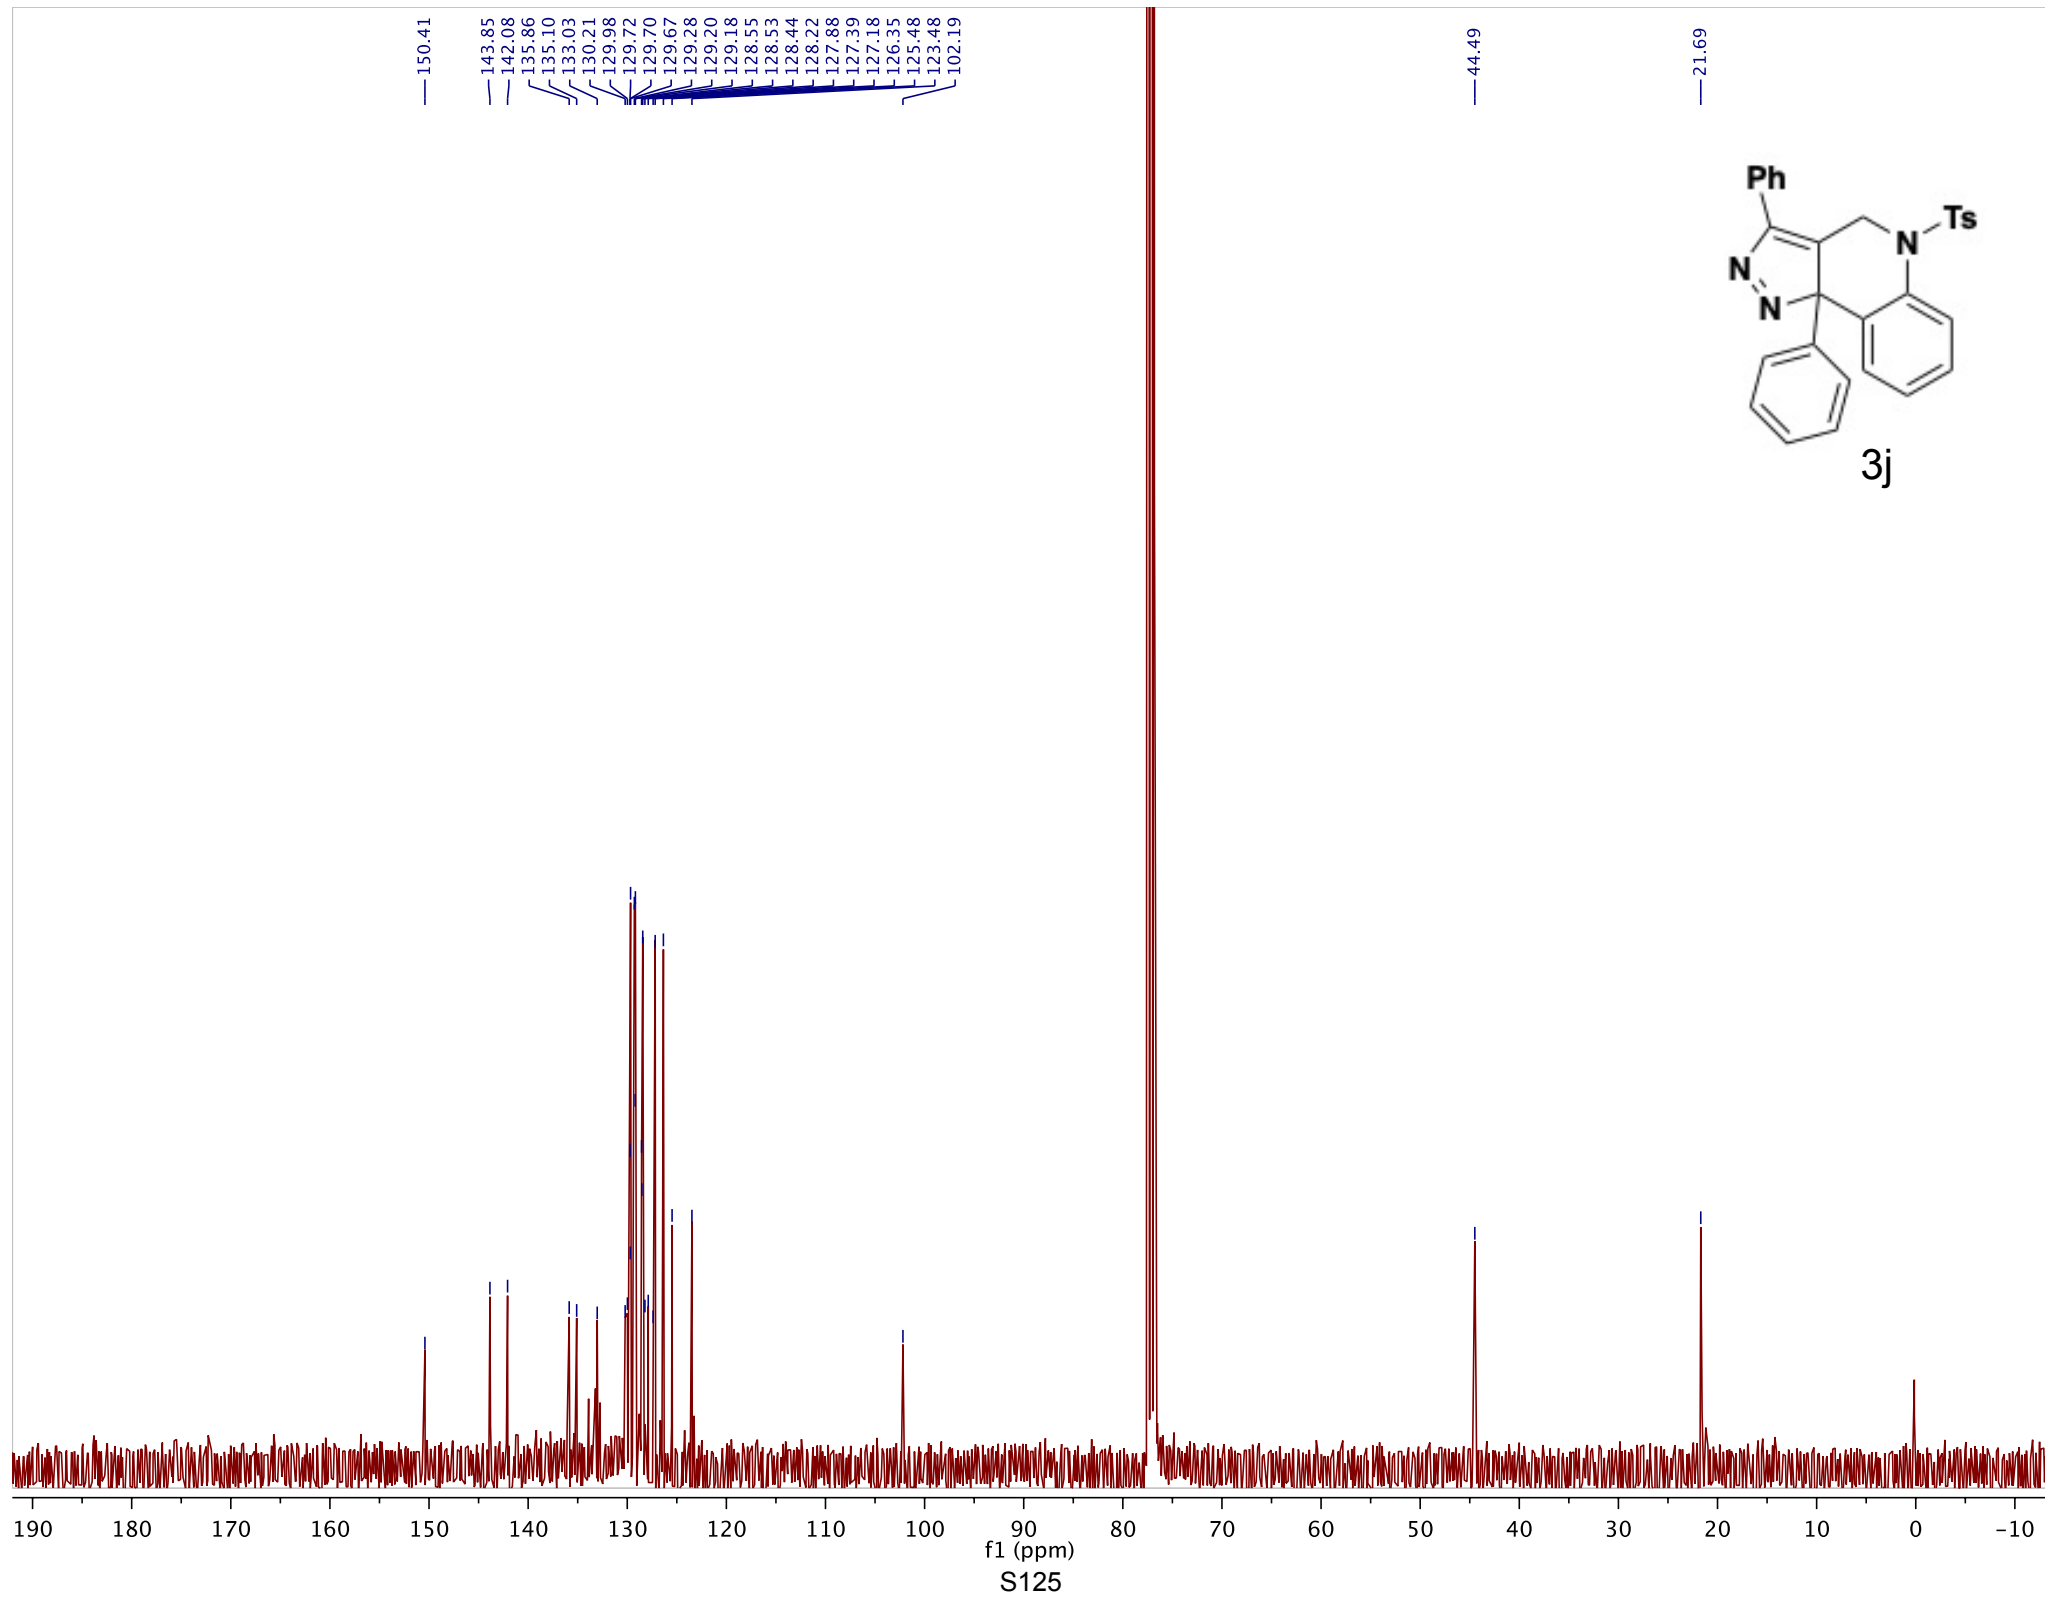

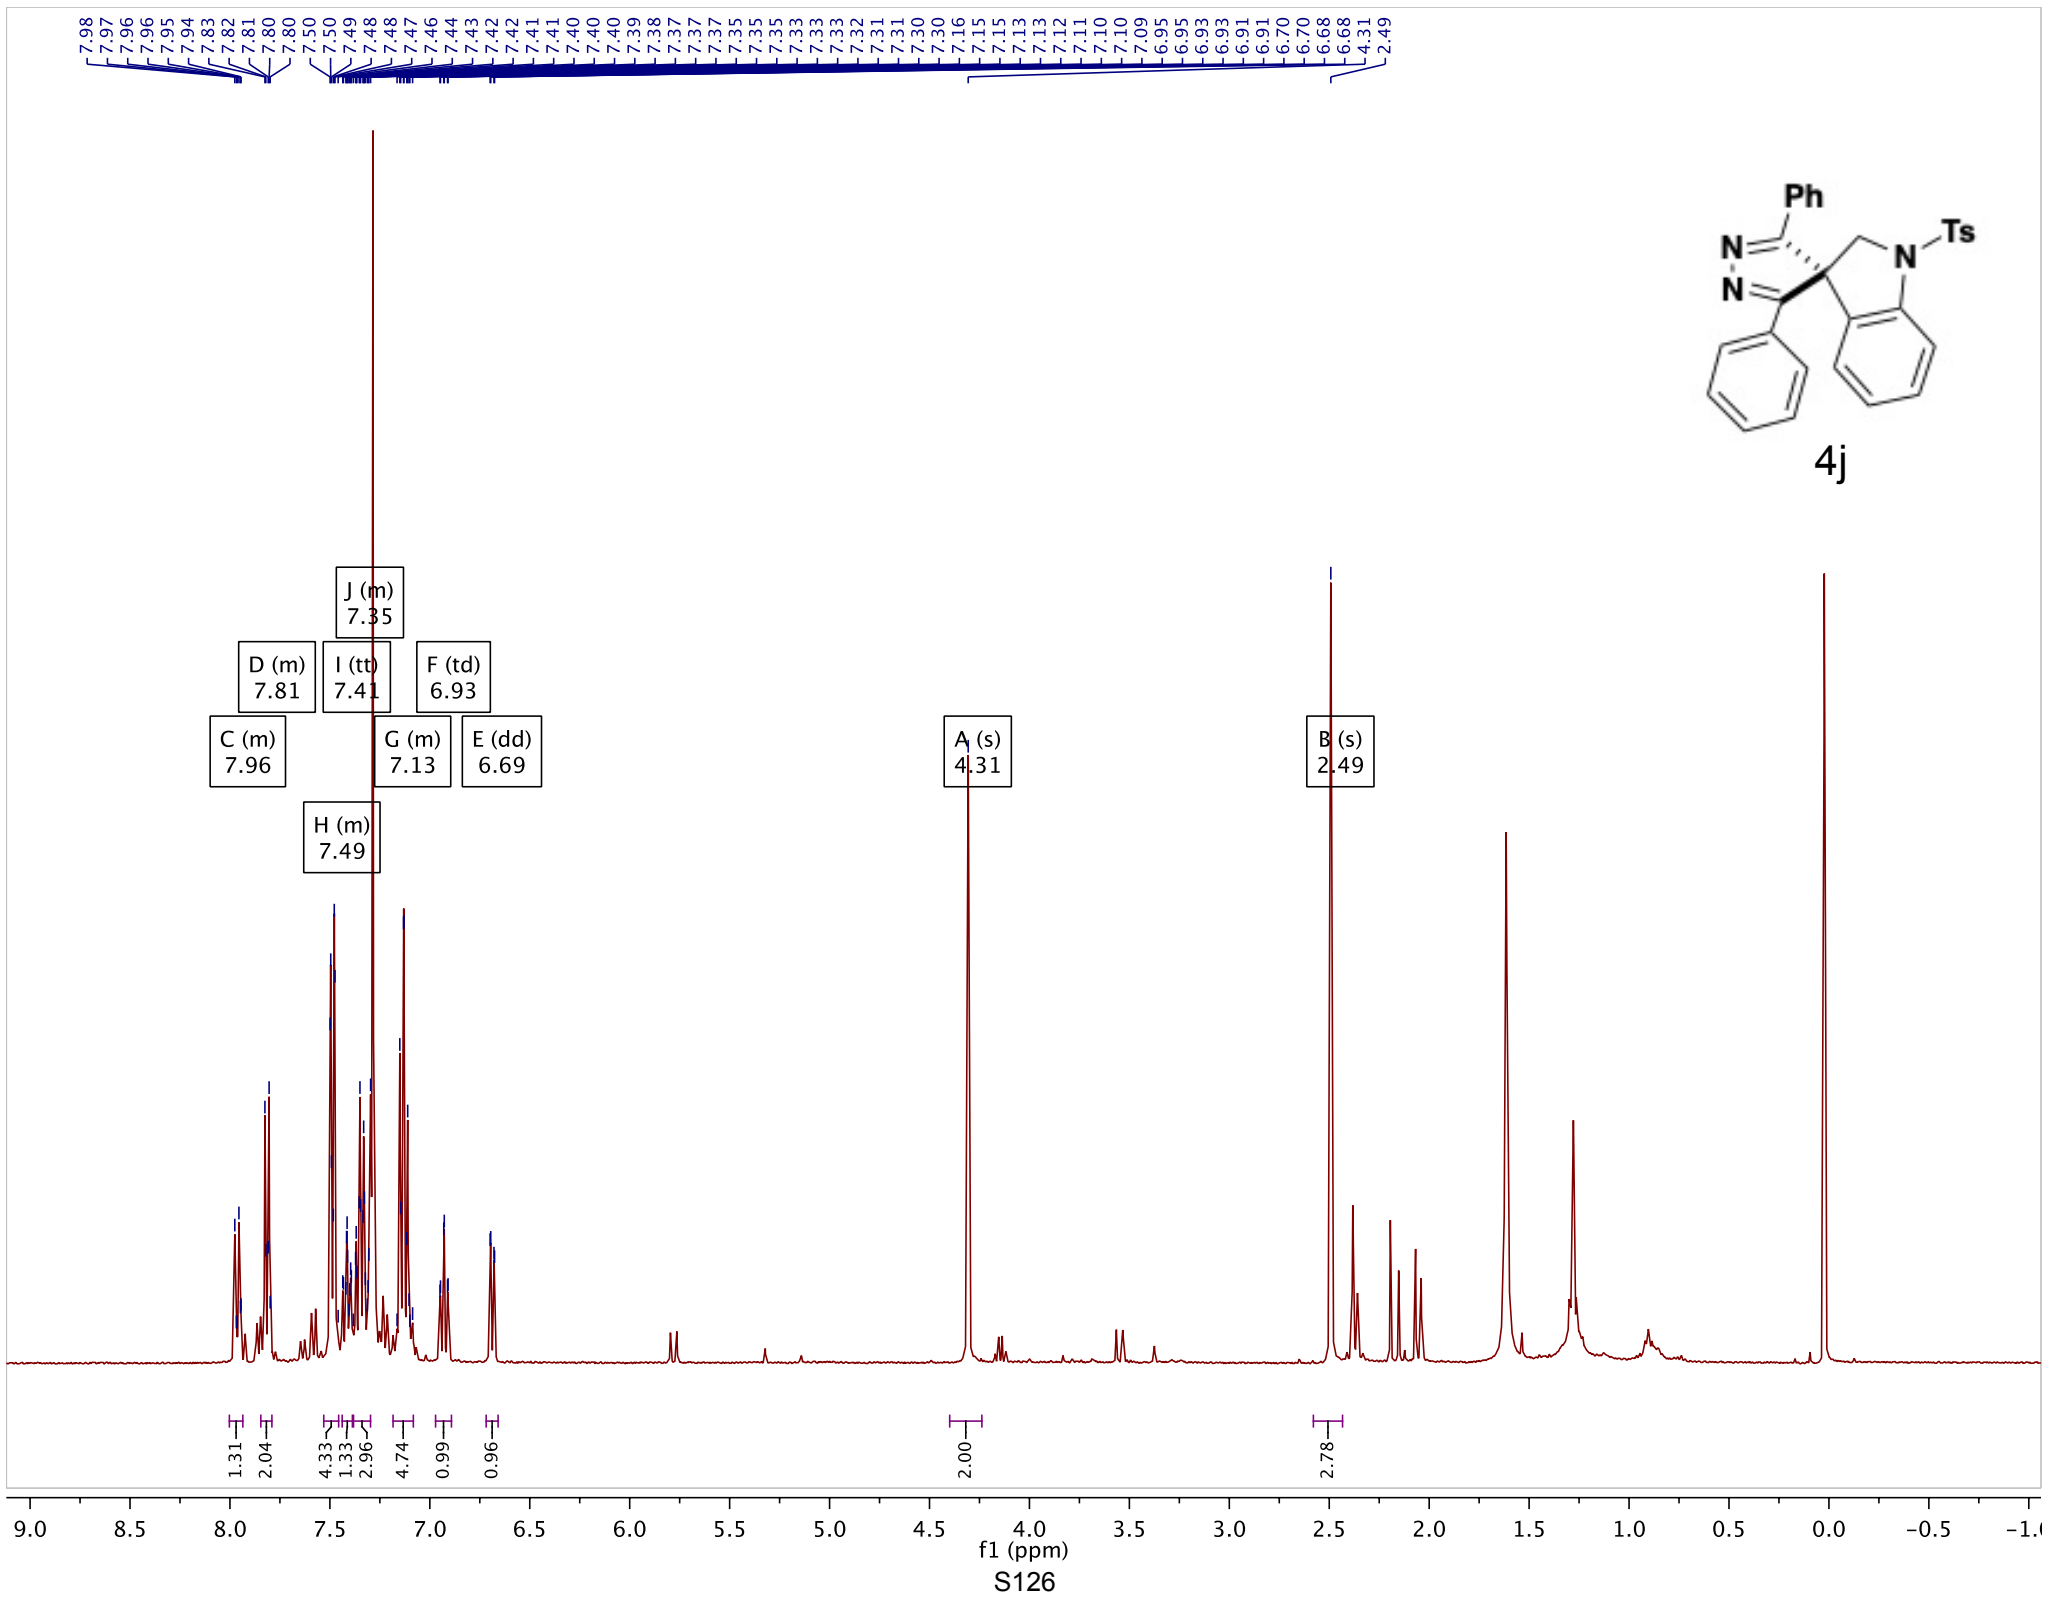

134.73  
134.37  
132.18  
131.19  
129.83  
129.44  
129.27  
129.02  
128.95  
128.58  
128.47  
128.38  
128.29  
128.23  
128.17  
127.38  
127.29  
126.17  
126.10  
117.17  
115.73

48.18

29.86

26.82

21.71

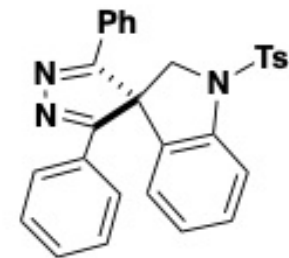

4j

190 180 170 160 150 140 130 120 110 100 90 80 70 60 50 40 30 20 10 0

f1 (ppm)

S127

7.99  
7.97  
7.96  
7.58  
7.56  
7.54  
7.54  
7.48  
7.47  
7.46  
7.44  
7.43  
7.42  
7.31  
7.31  
7.30  
7.29  
7.28

4.48  
4.47  
4.45  
4.43  
4.24  
4.22  
4.22  
4.21  
4.20  
4.18  
3.98  
3.96  
3.95  
3.94  
3.94  
3.92  
3.41  
3.39  
3.38  
3.37  
3.35  
3.33  
3.31  
3.30  
3.28  
3.27  
3.25  
3.24

1.52  
1.50

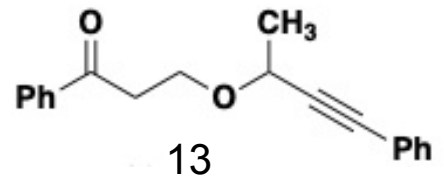

F (m) 7.98  
H (m) 7.44  
G (m) 7.56  
I (m) 7.30  
A (q) 4.46  
B (m) 4.21  
C (m) 3.95  
D (qt) 3.32  
E (d) 1.51

2.13  
1.04  
4.33  
3.04  
0.98  
1.05  
1.01  
2.17  
2.92

9.0 8.5 8.0 7.5 7.0 6.5 6.0 5.5 5.0 4.5 4.0 3.5 3.0 2.5 2.0 1.5 1.0 0.5 0.0 -0.5 -1.0

f1 (ppm)  
S128



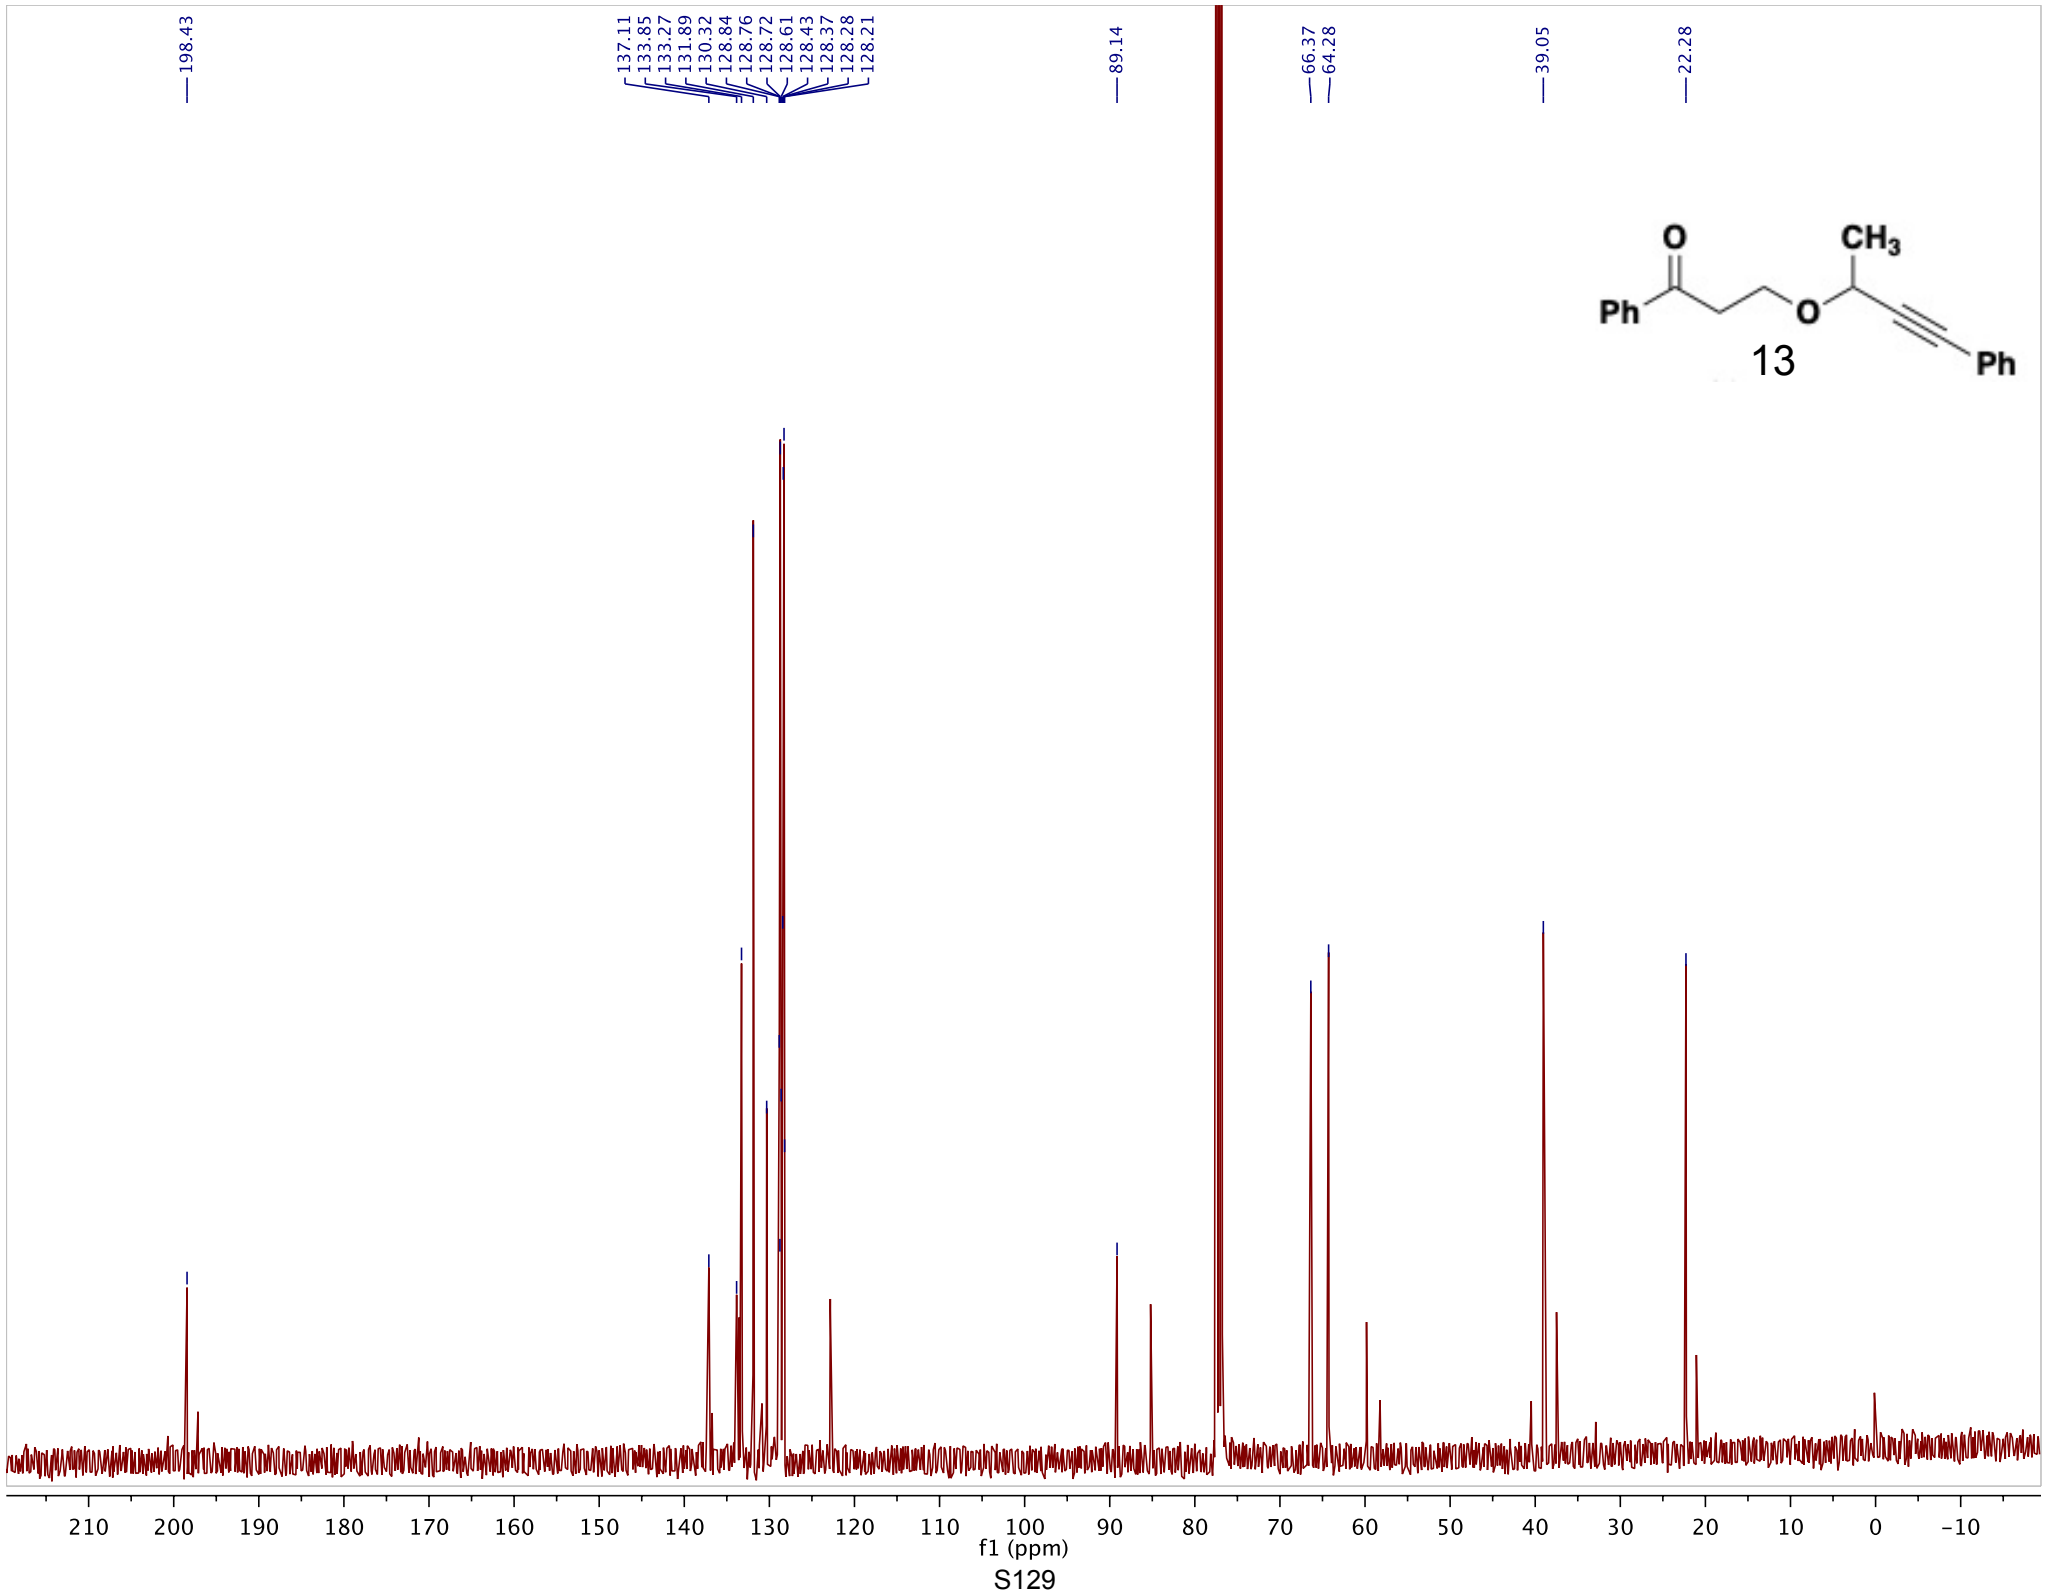

198.43

137.11  
133.85  
133.27  
131.89  
130.32  
128.84  
128.76  
128.72  
128.61  
128.43  
128.37  
128.28  
128.21

89.14

66.37  
64.28

39.05

22.28

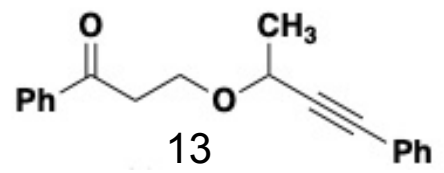

210 200 190 180 170 160 150 140 130 120 110 100 90 80 70 60 50 40 30 20 10 0 -10

f1 (ppm)  
S129

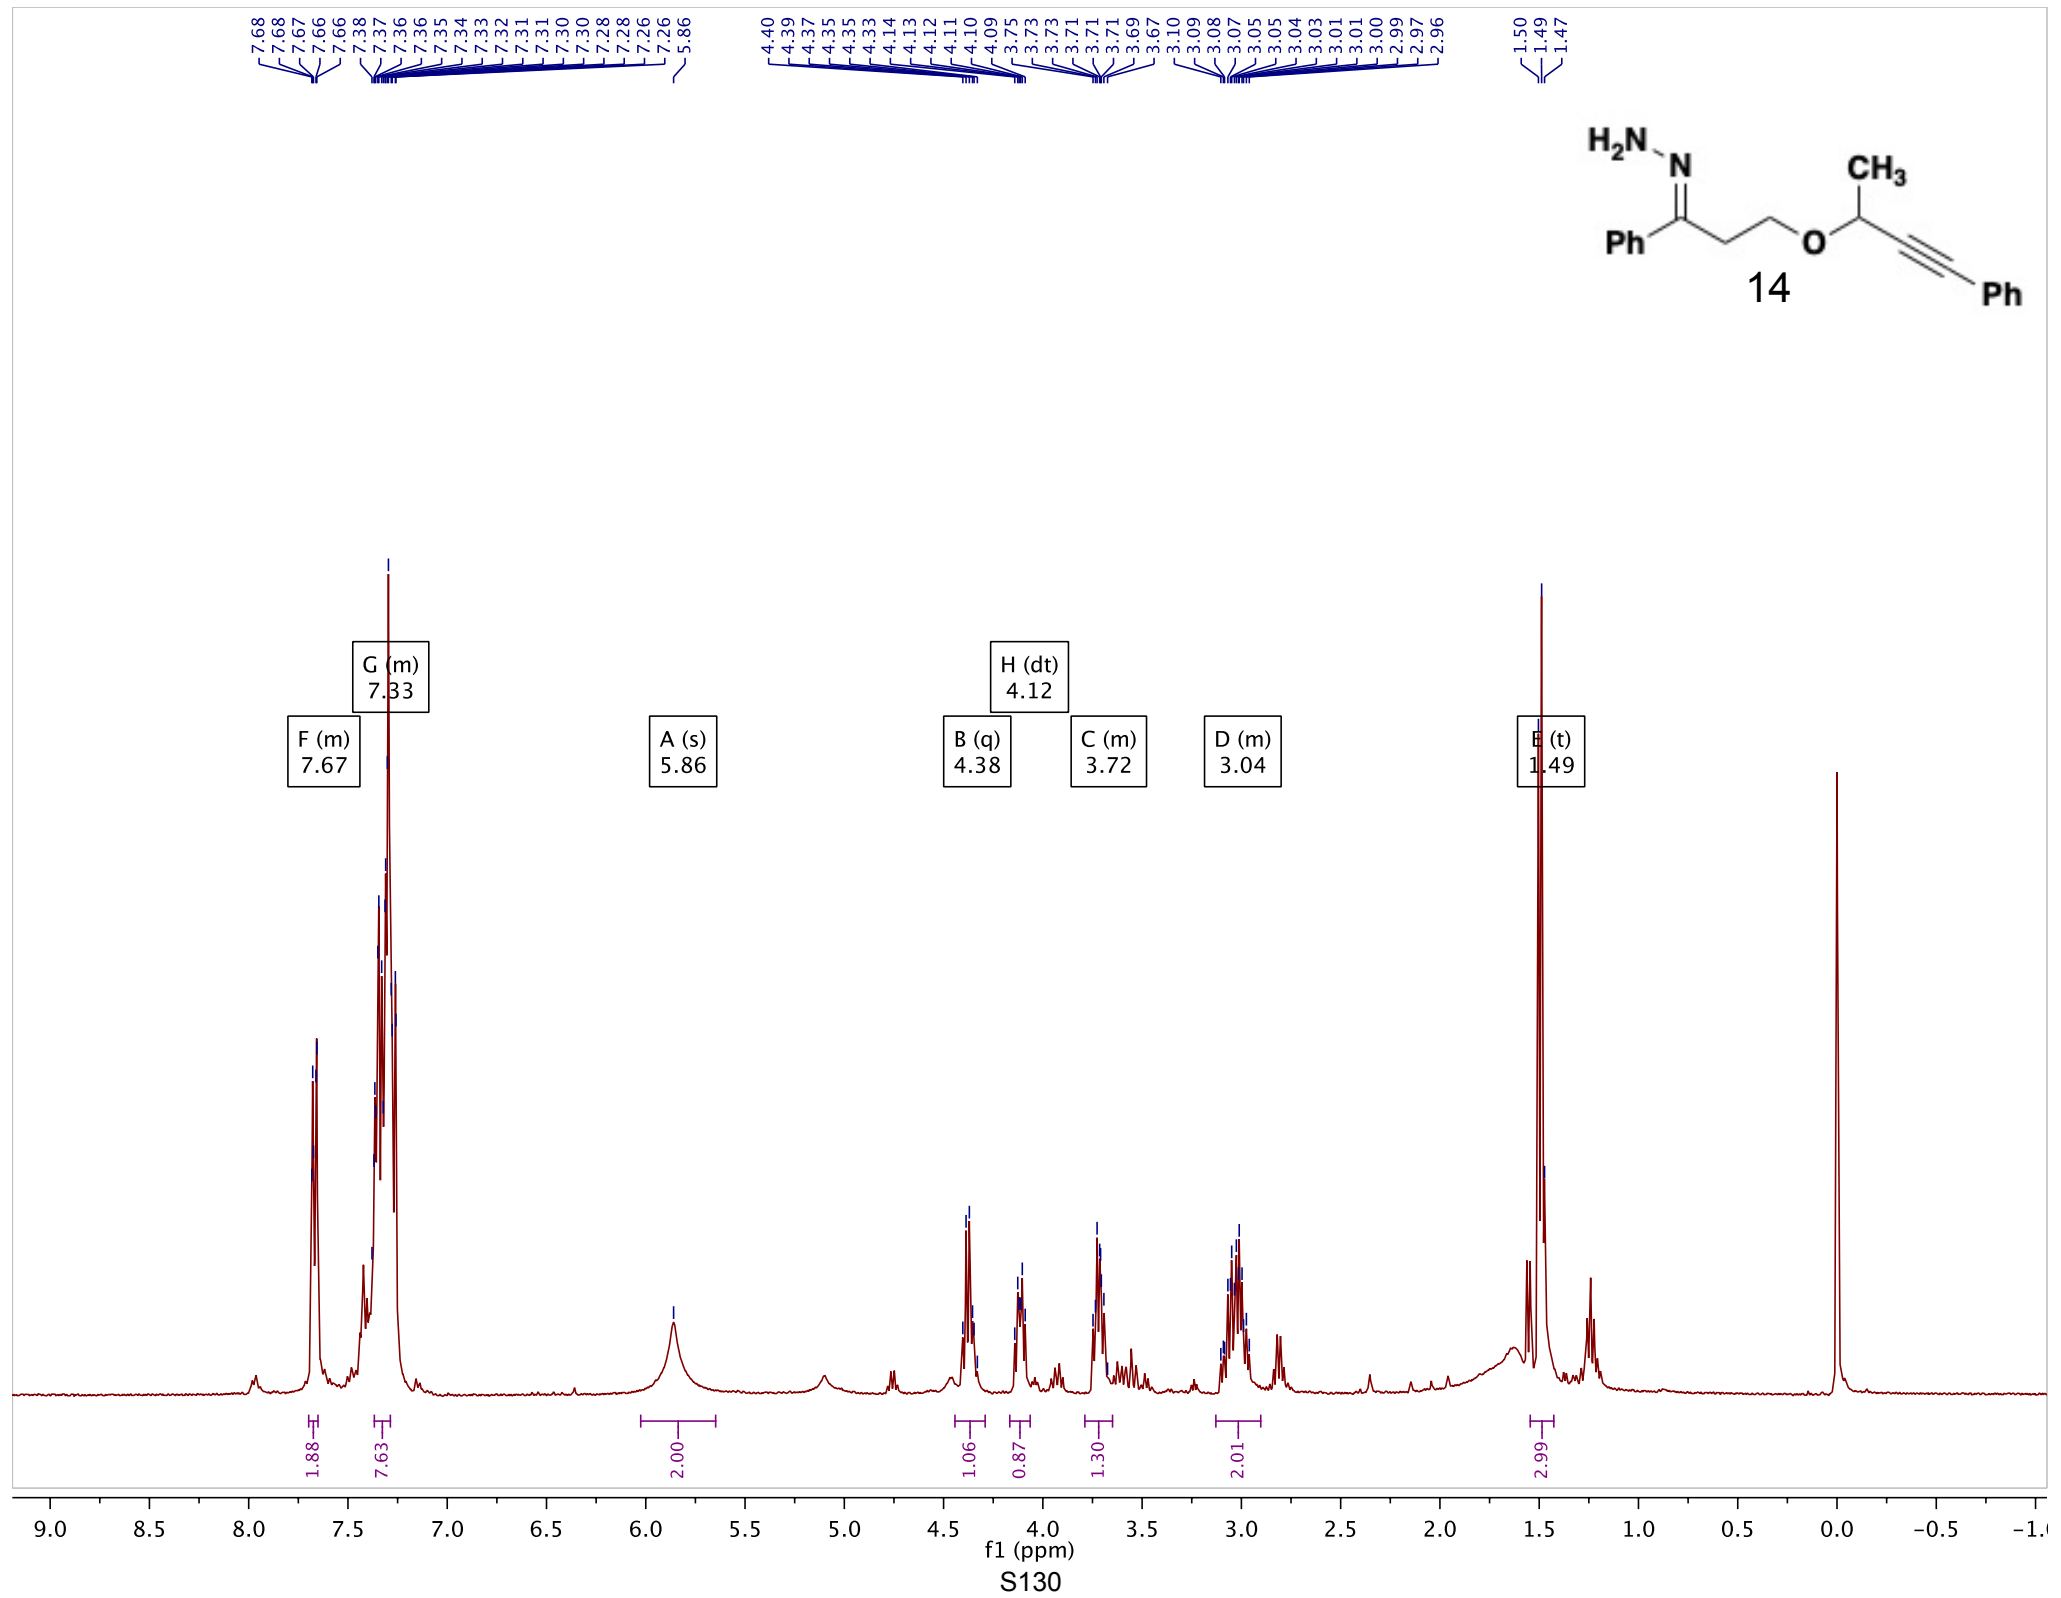

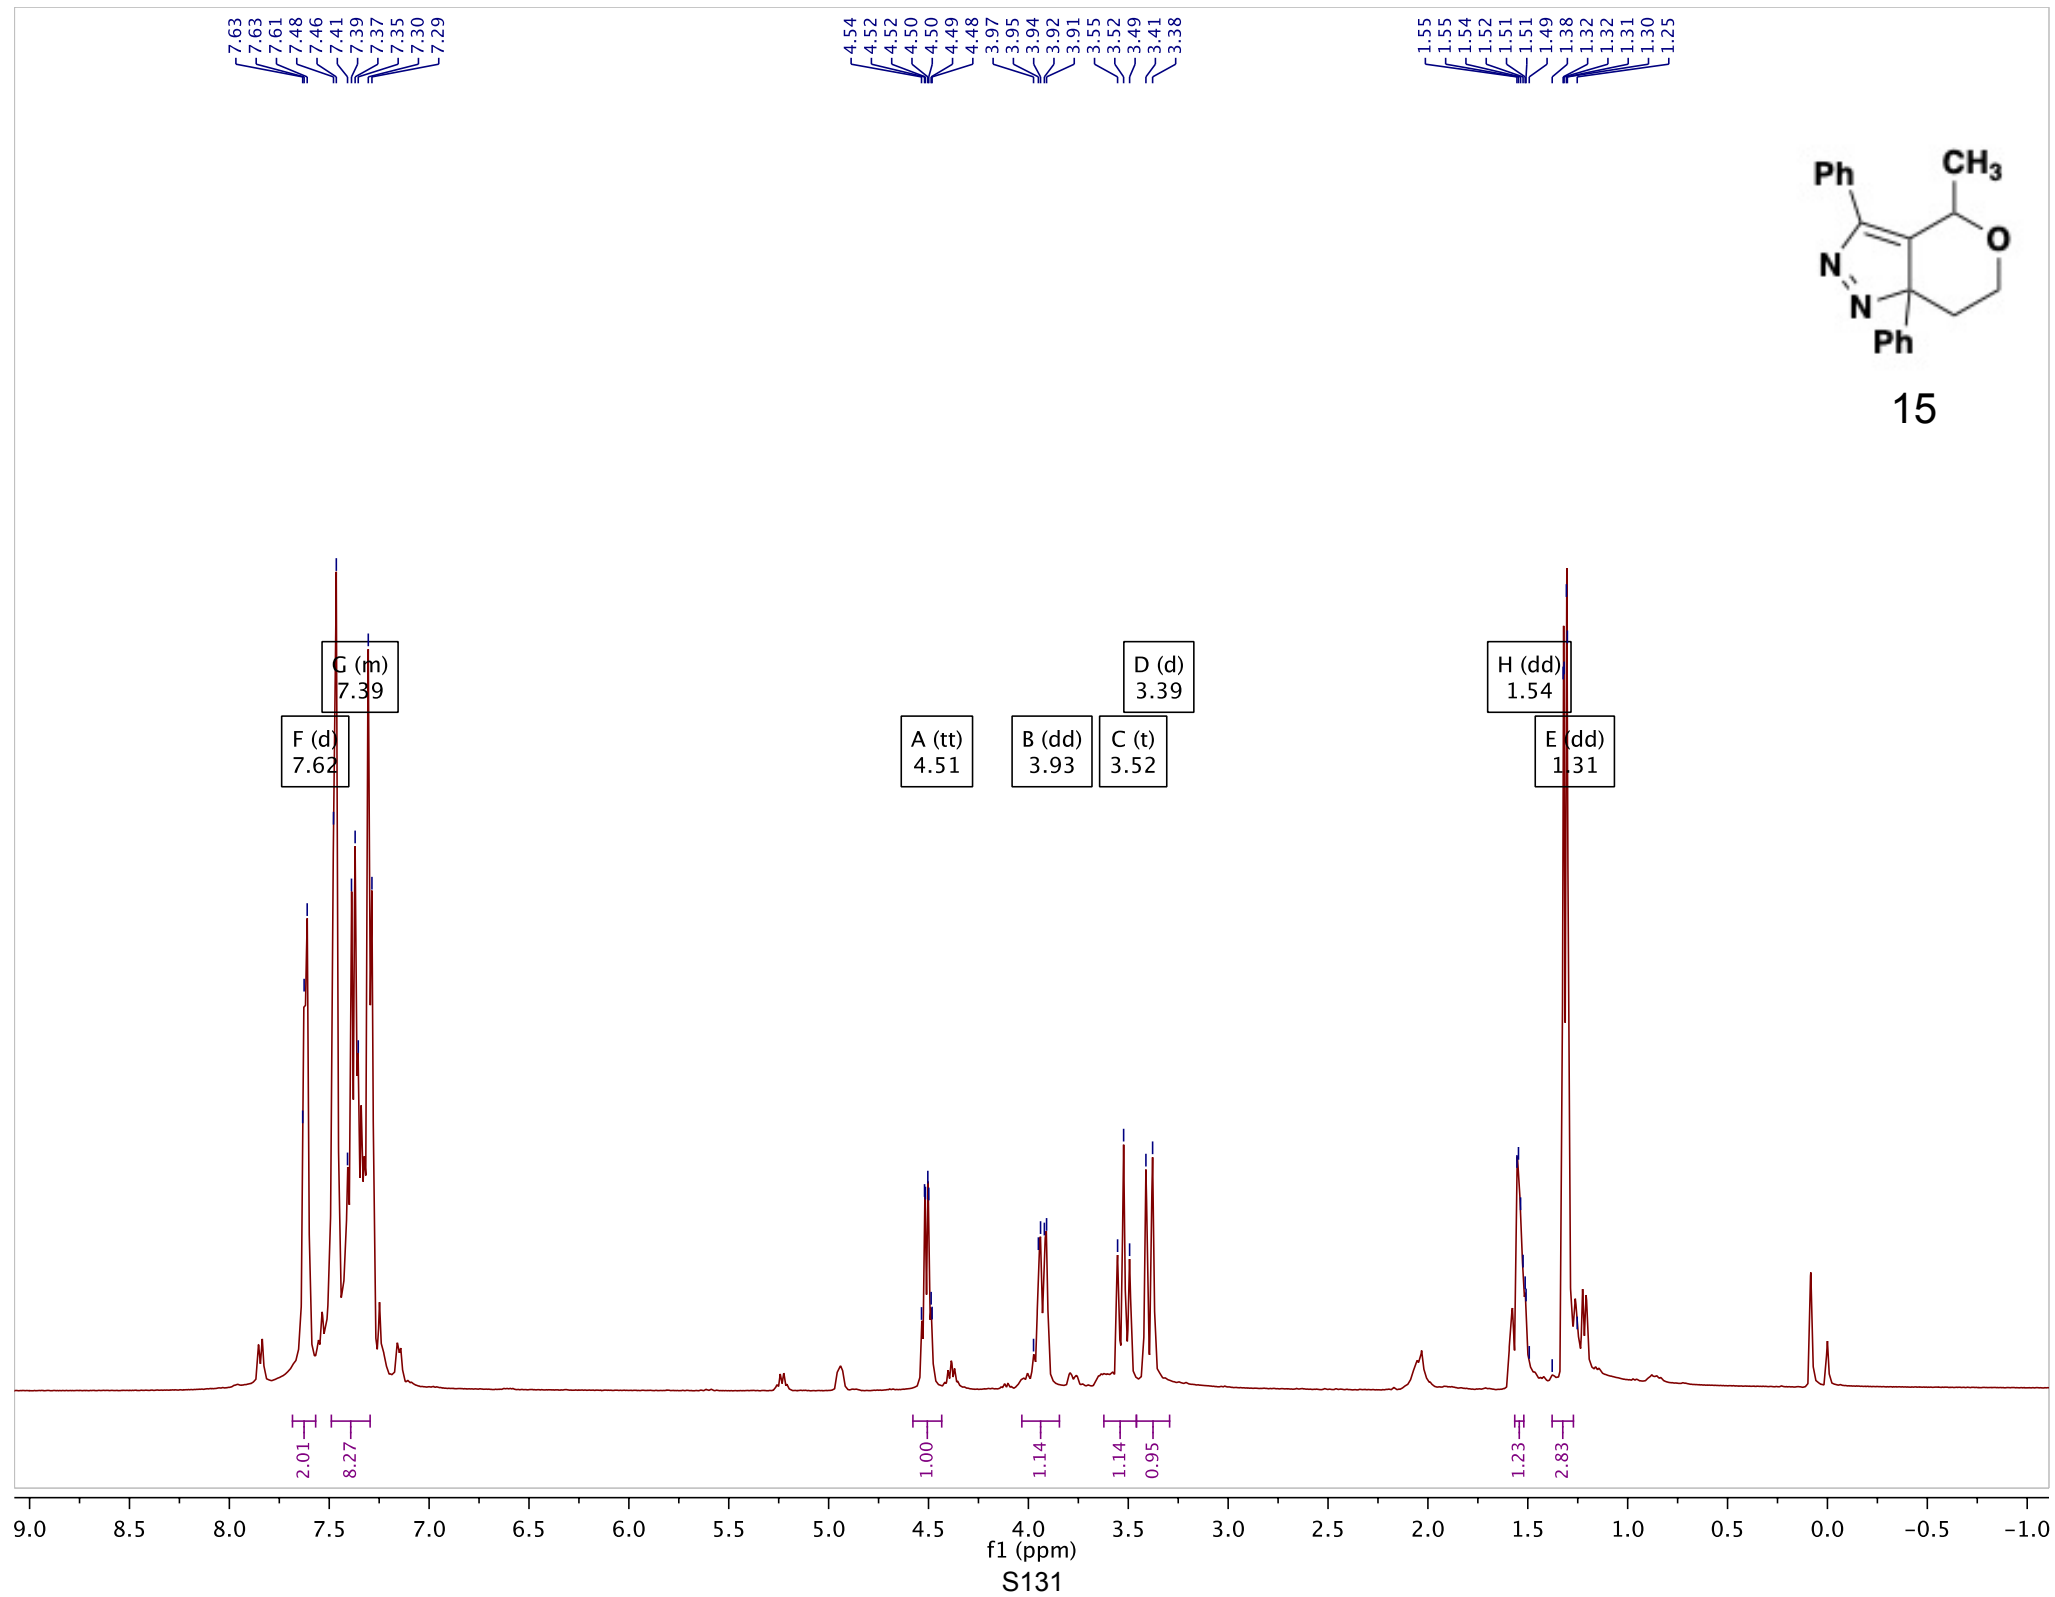

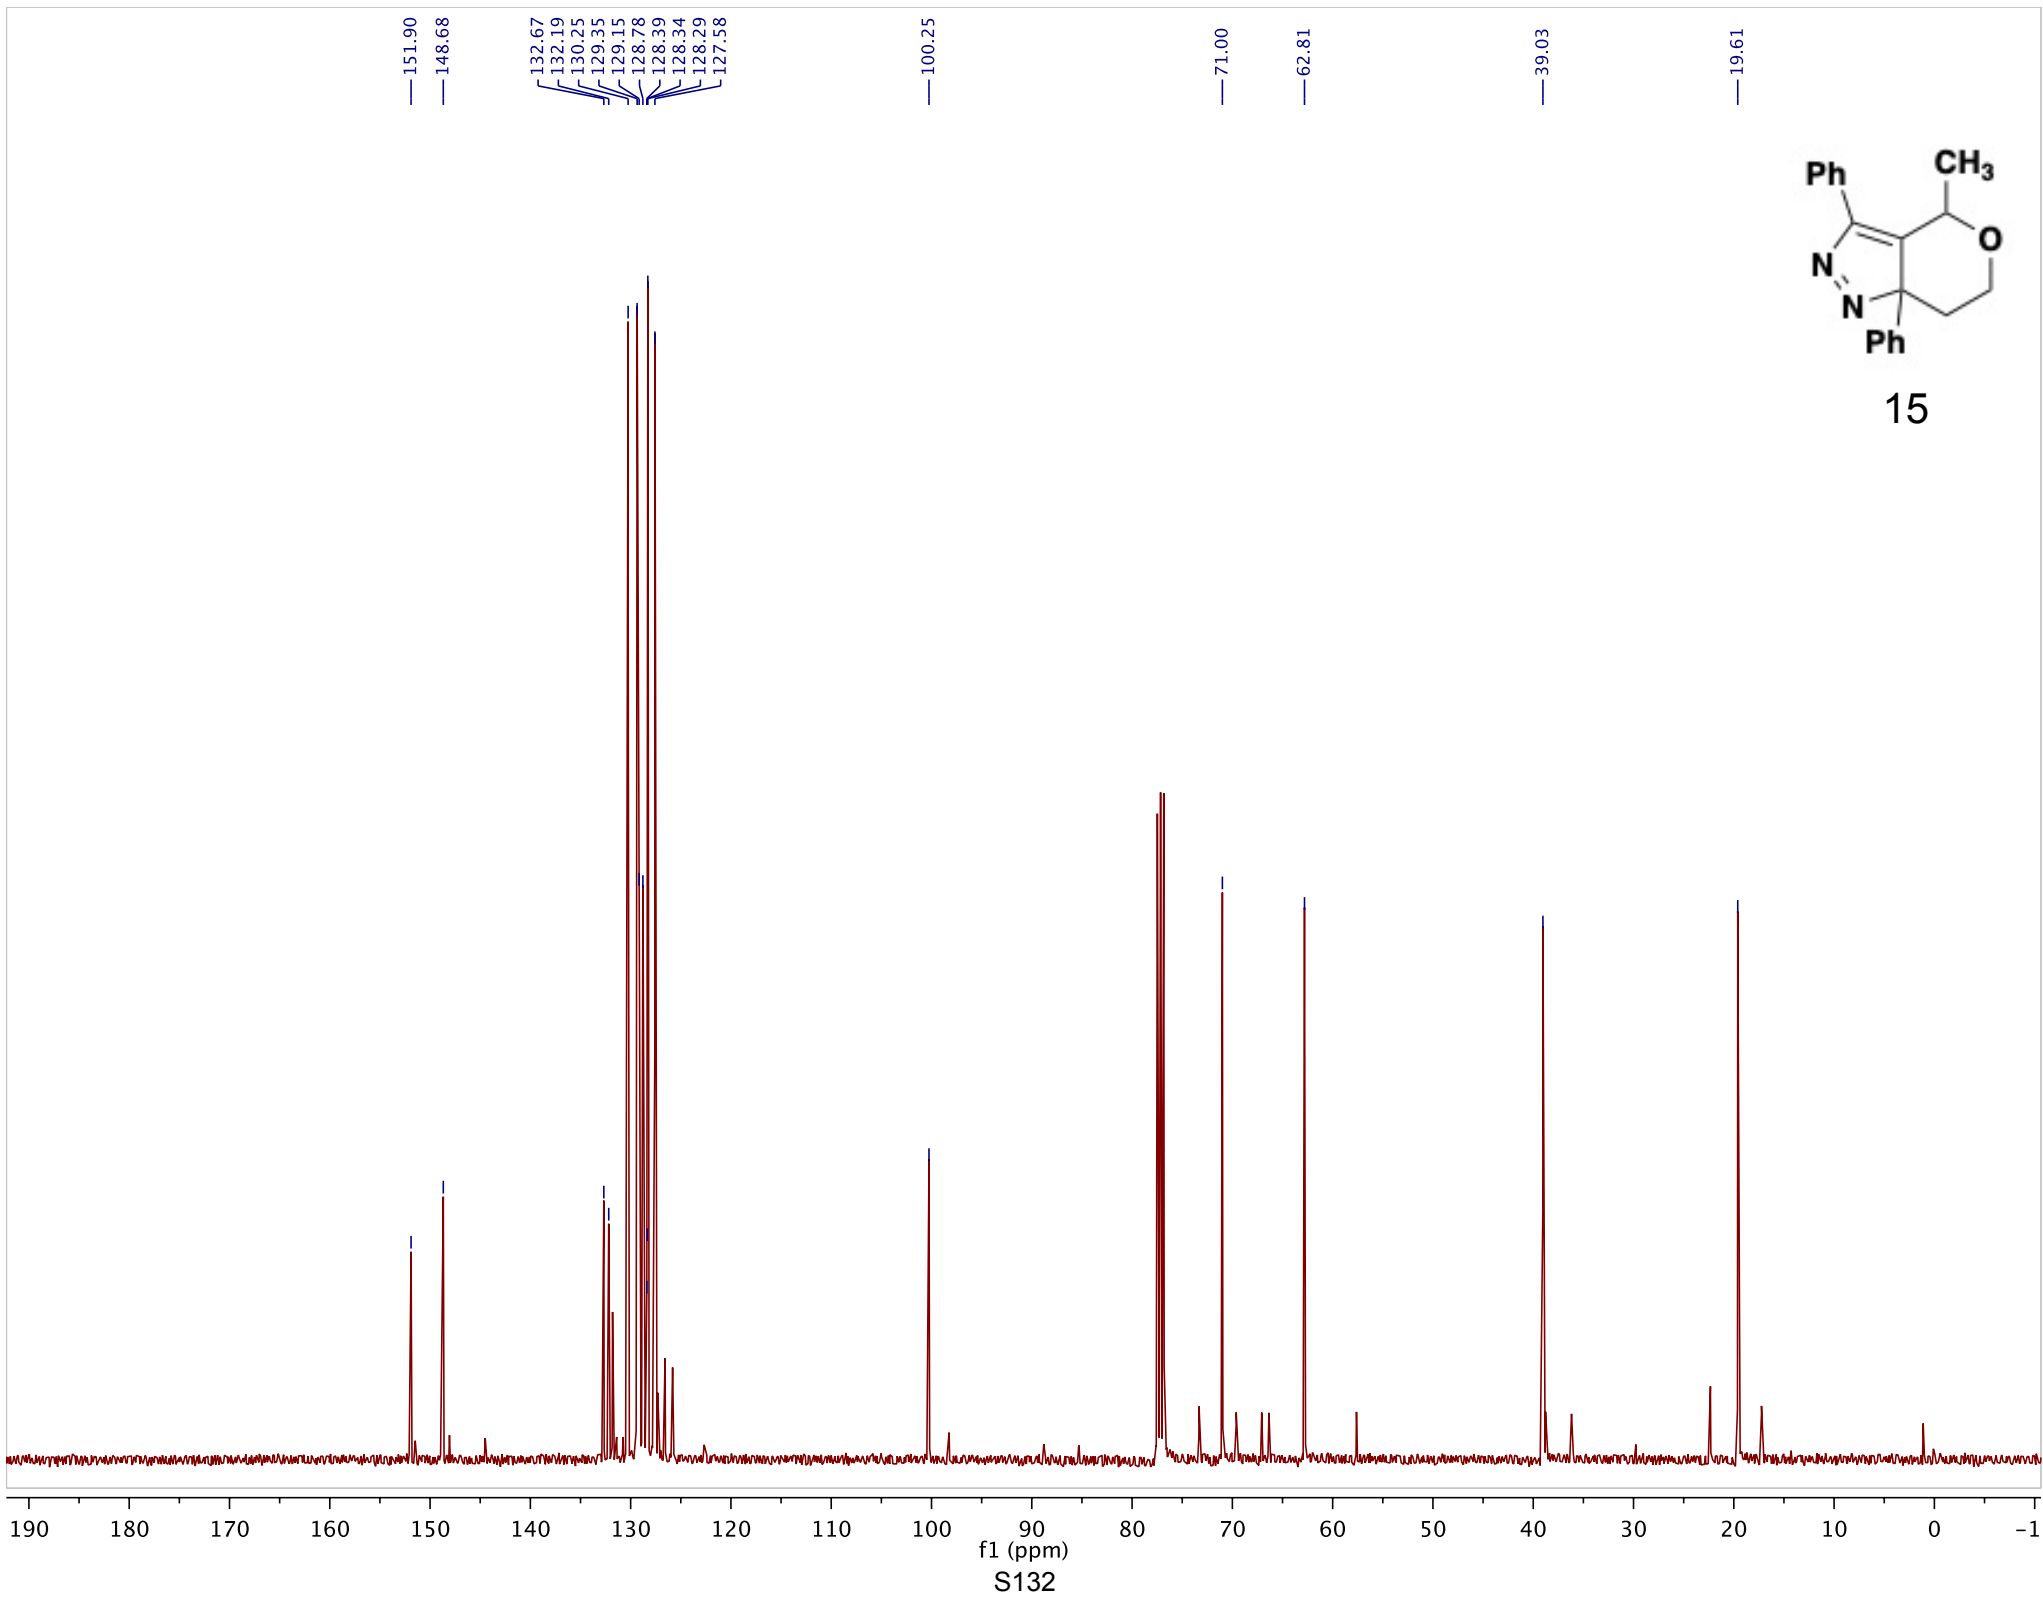

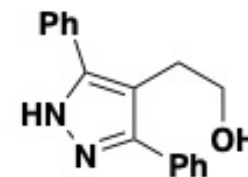

19

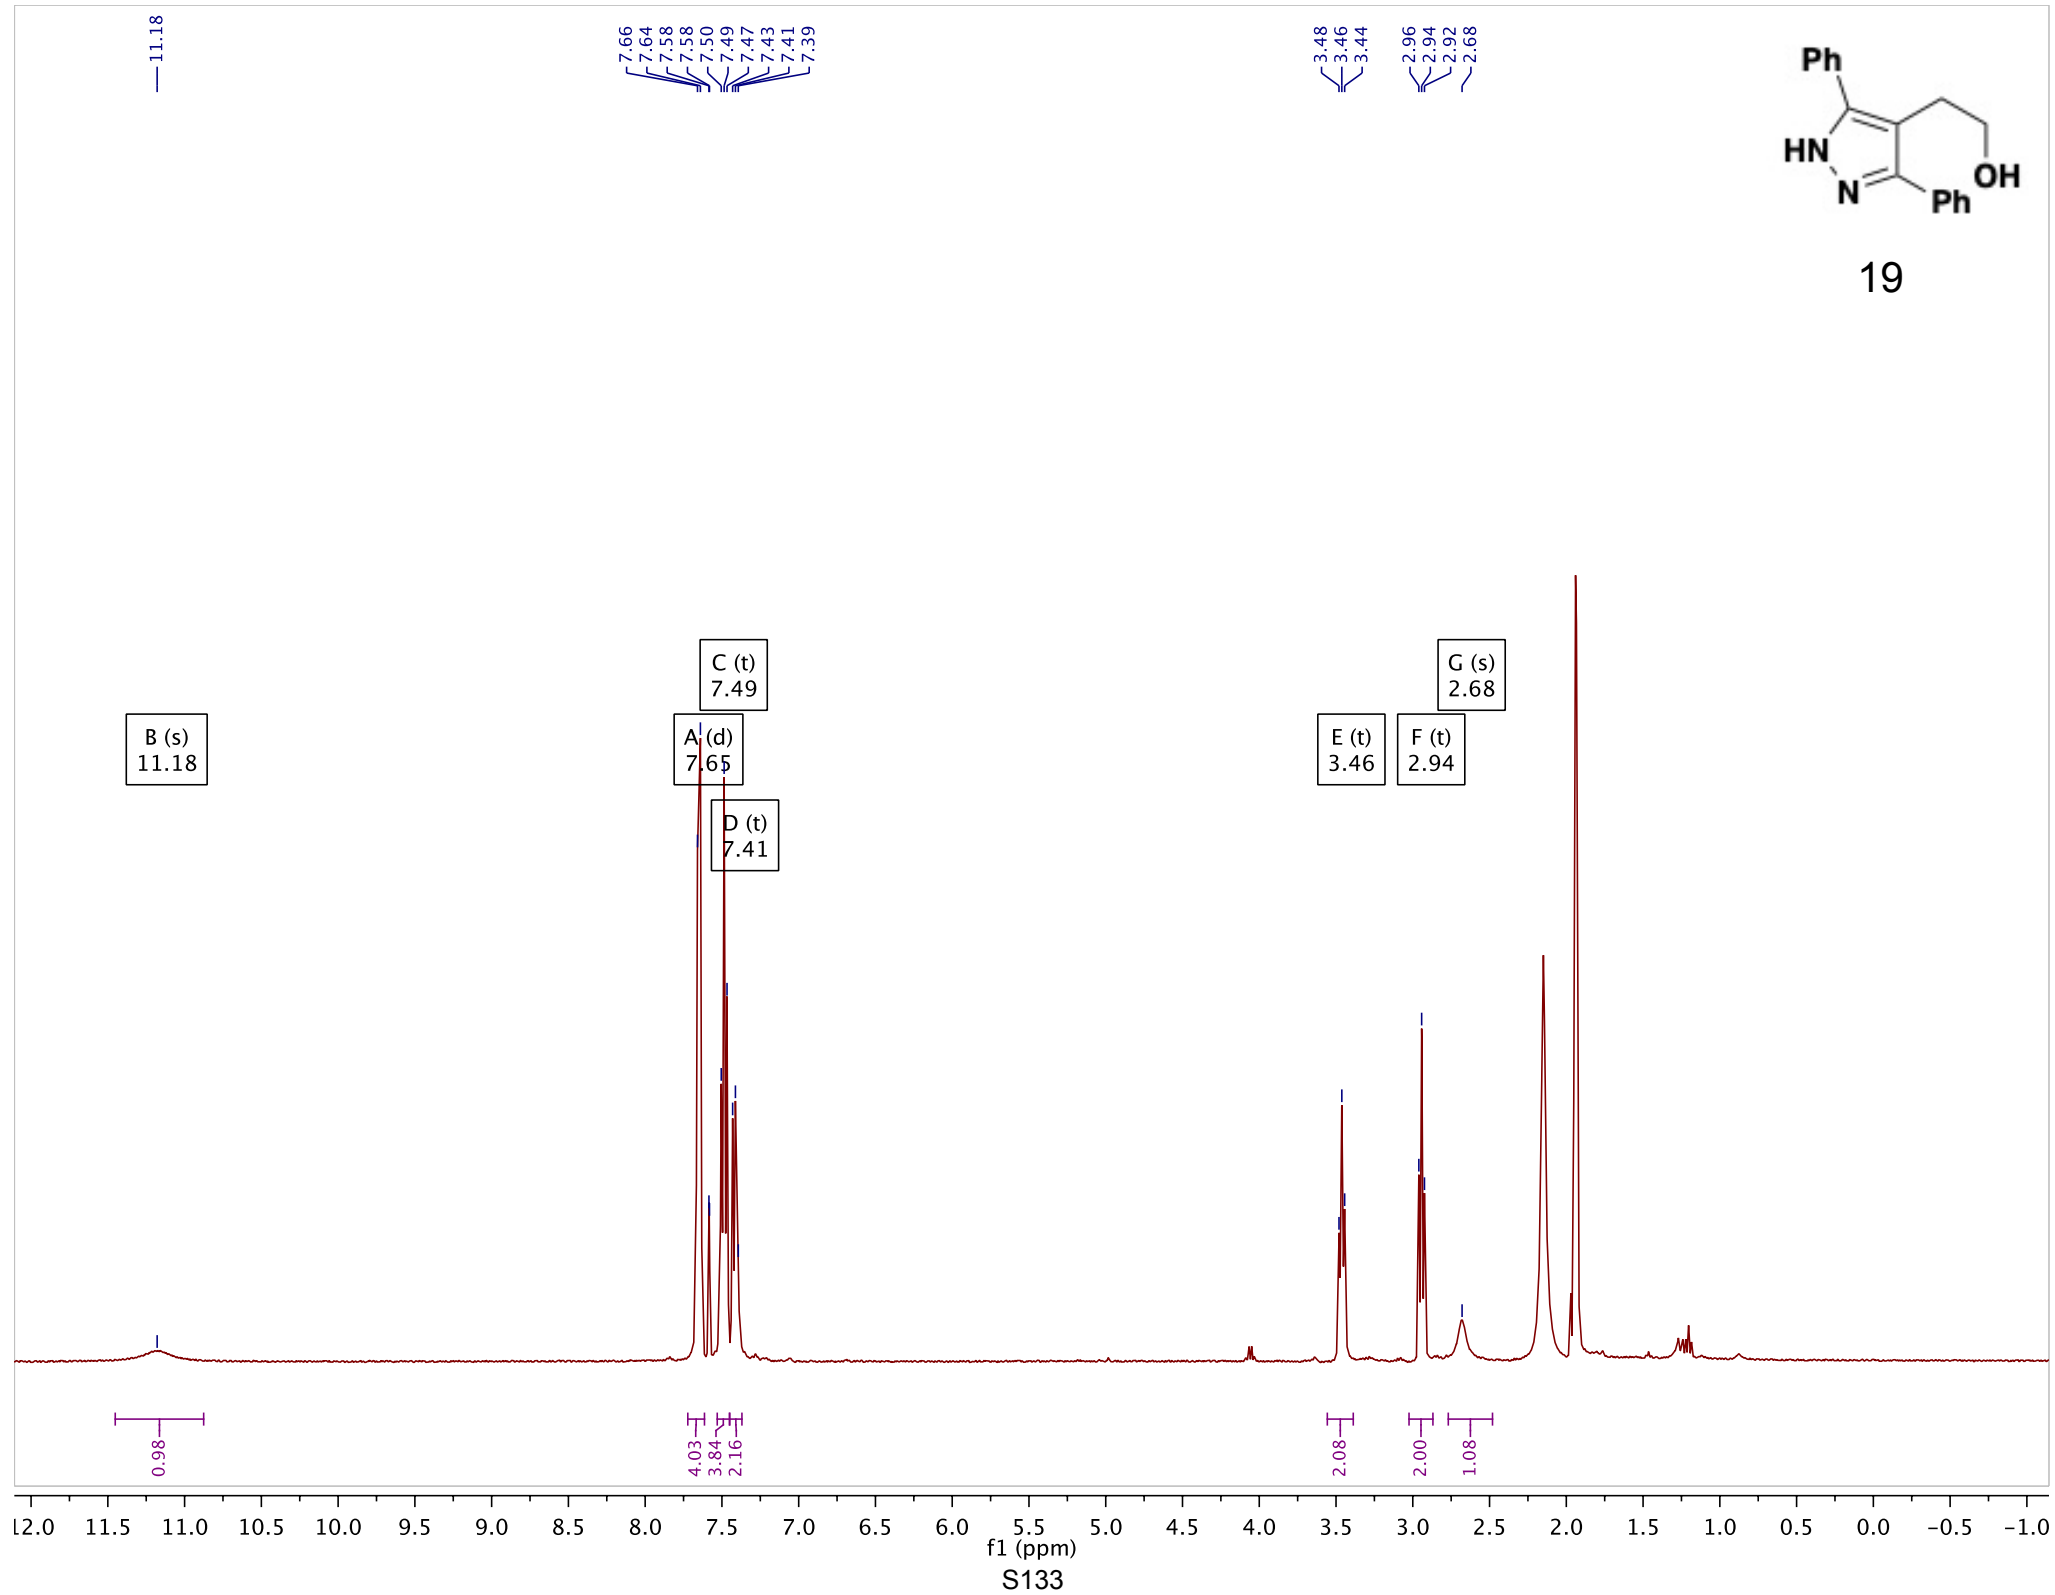

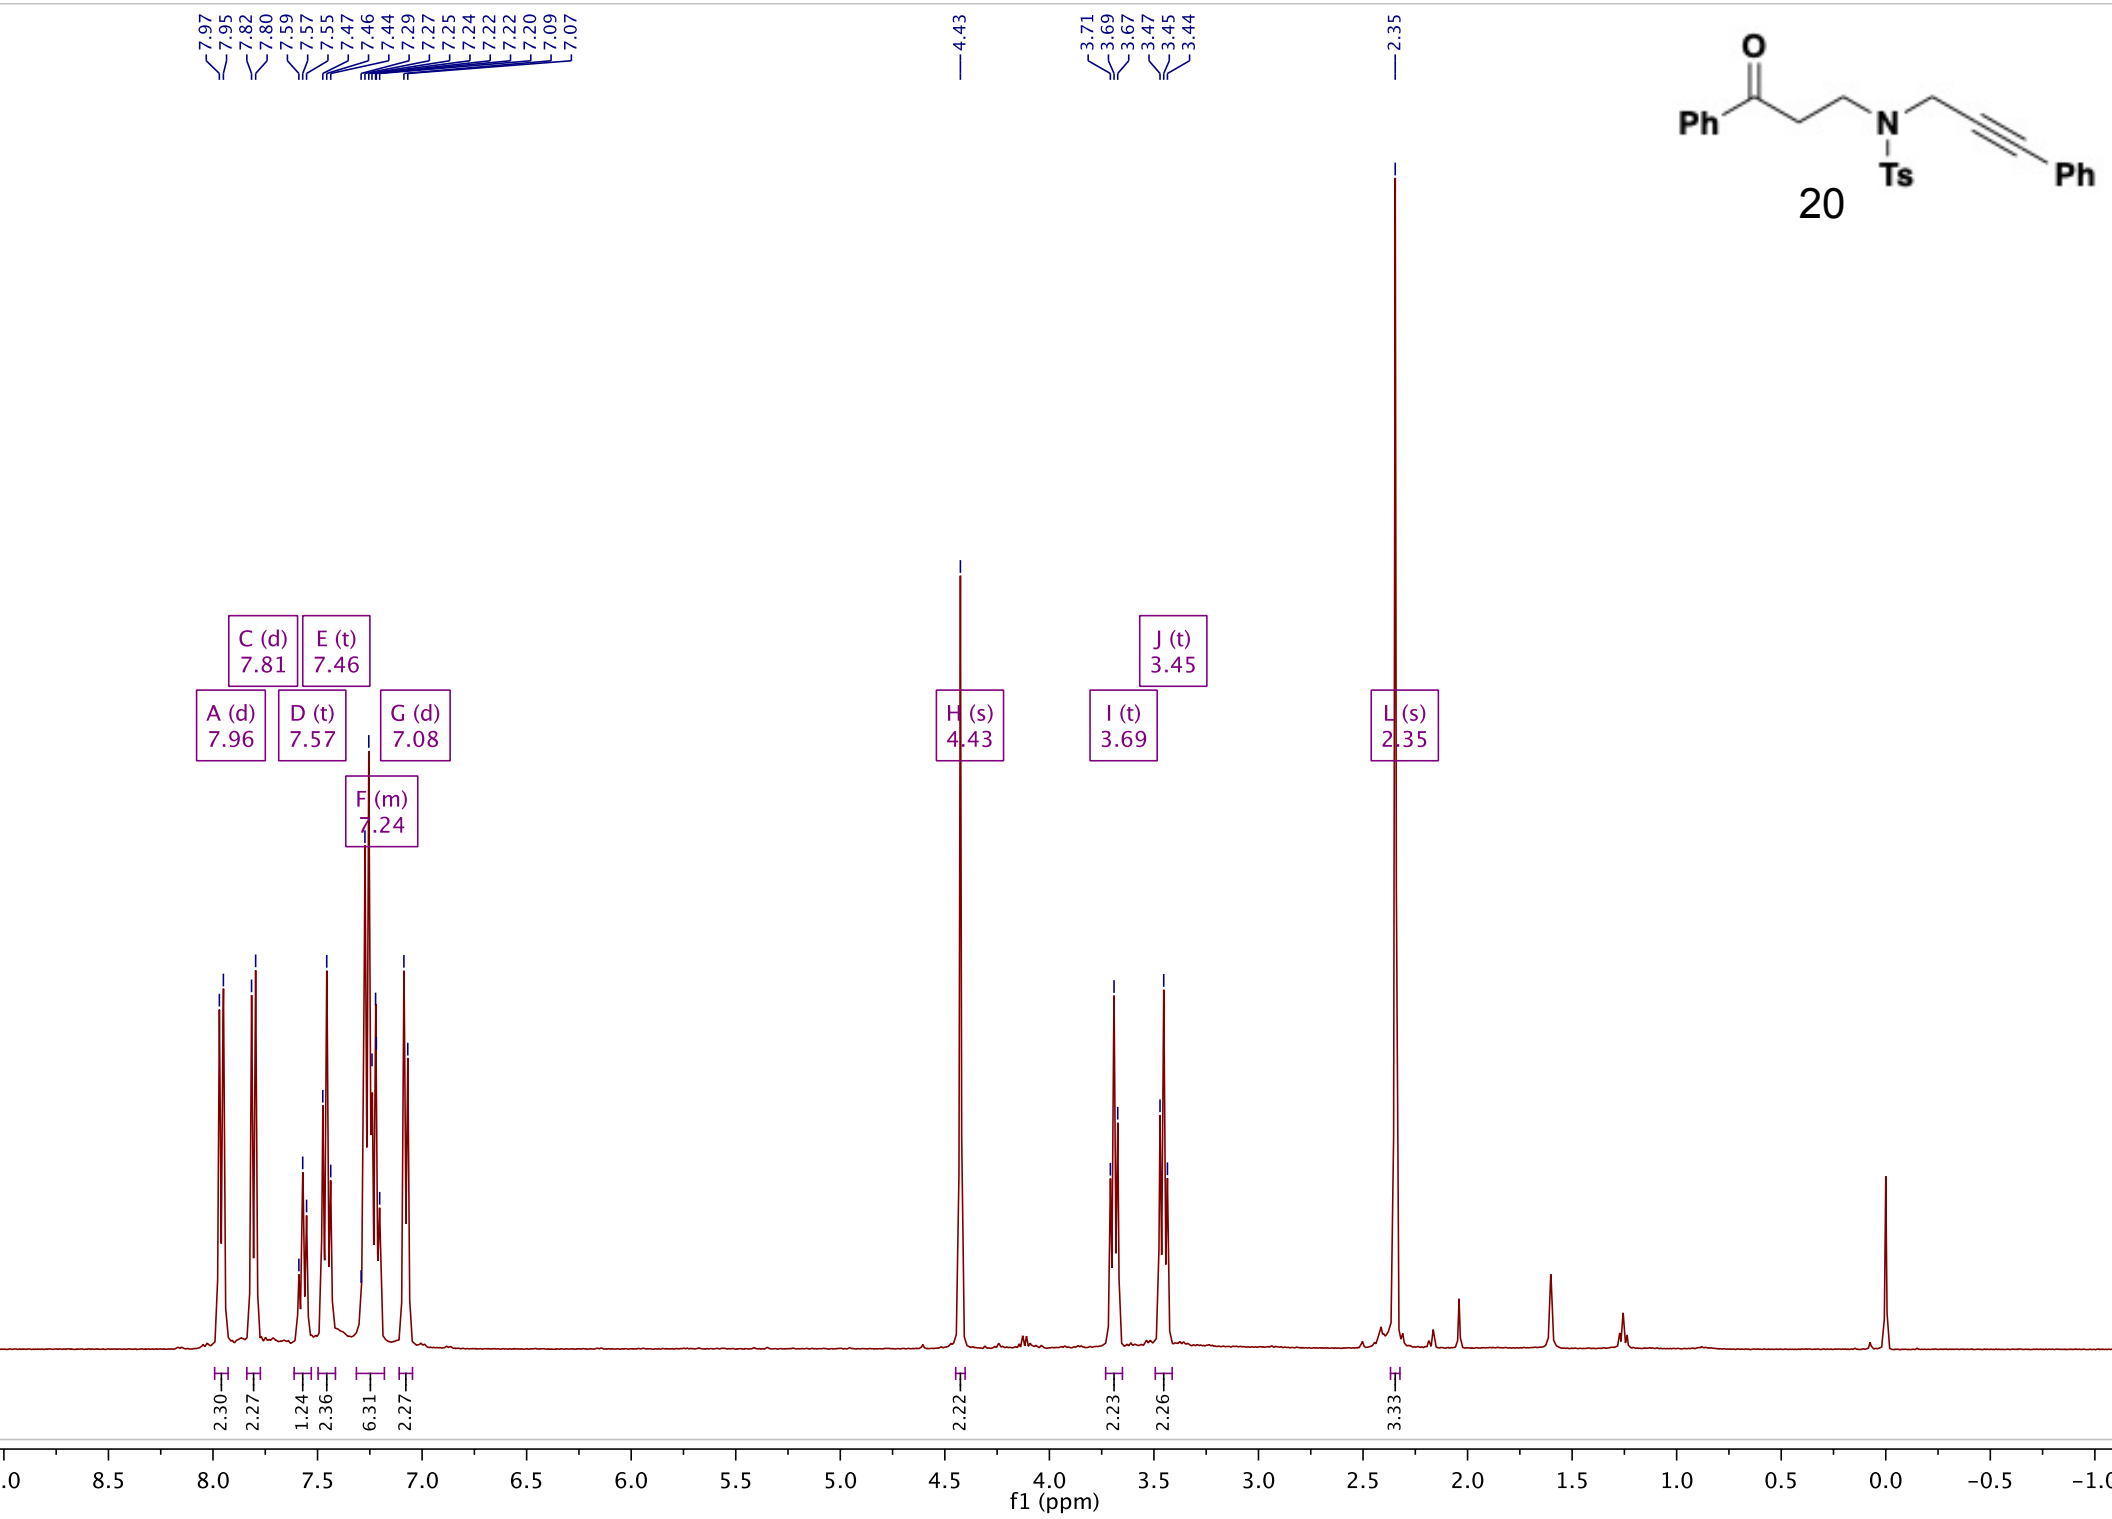

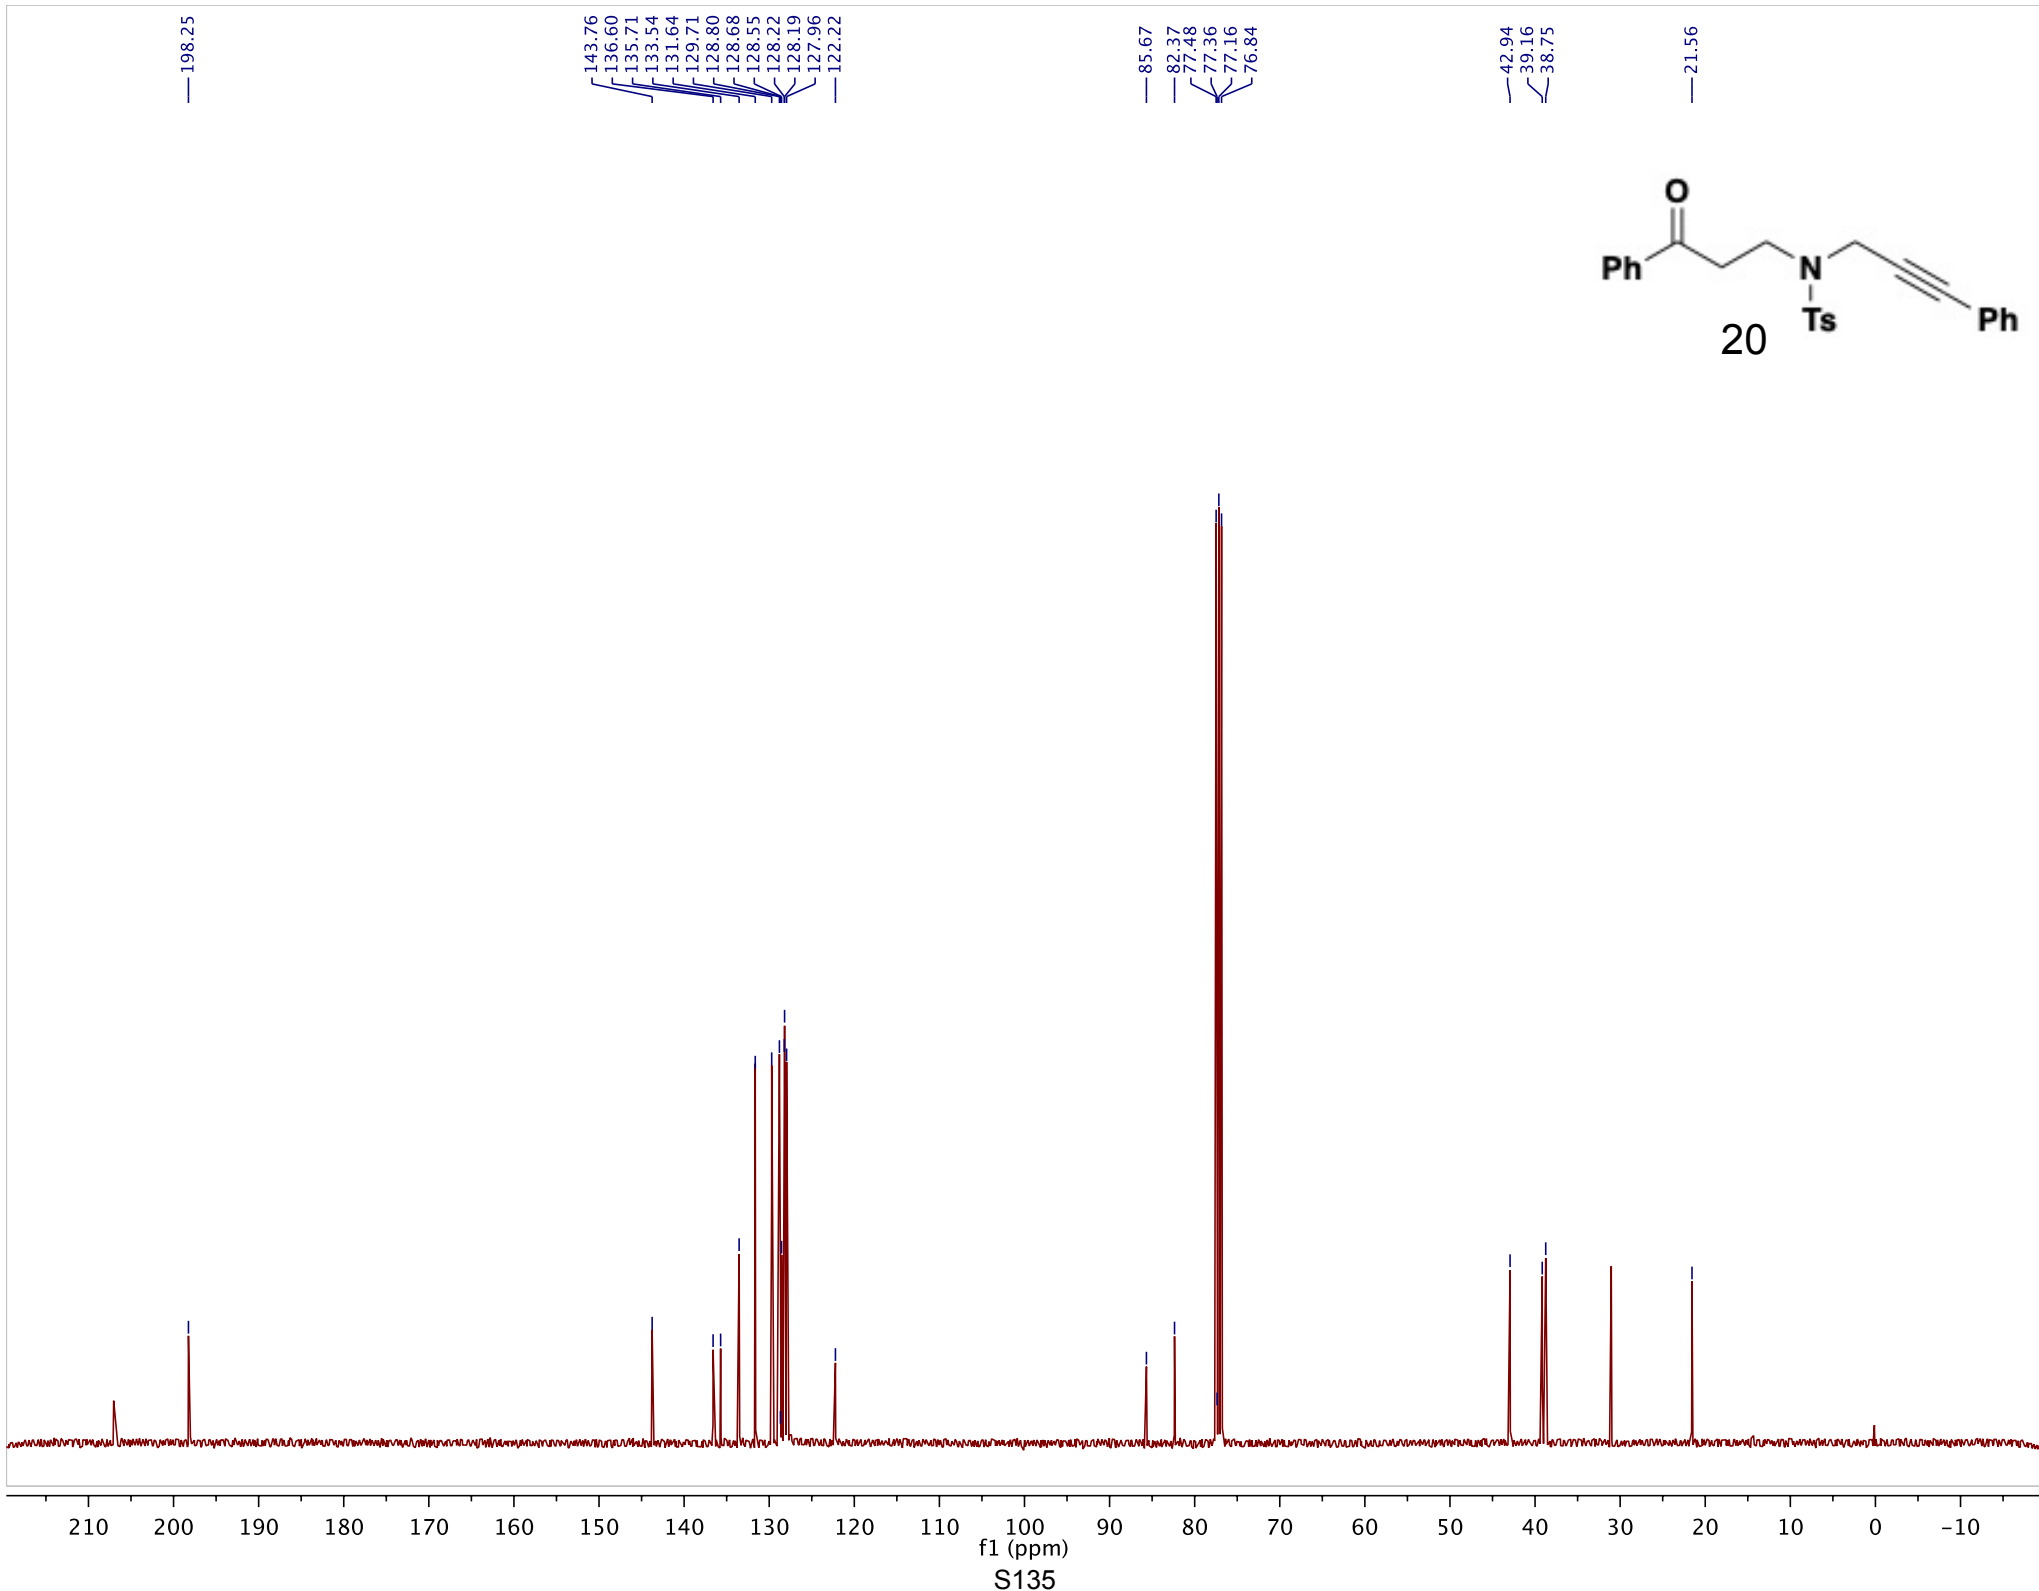

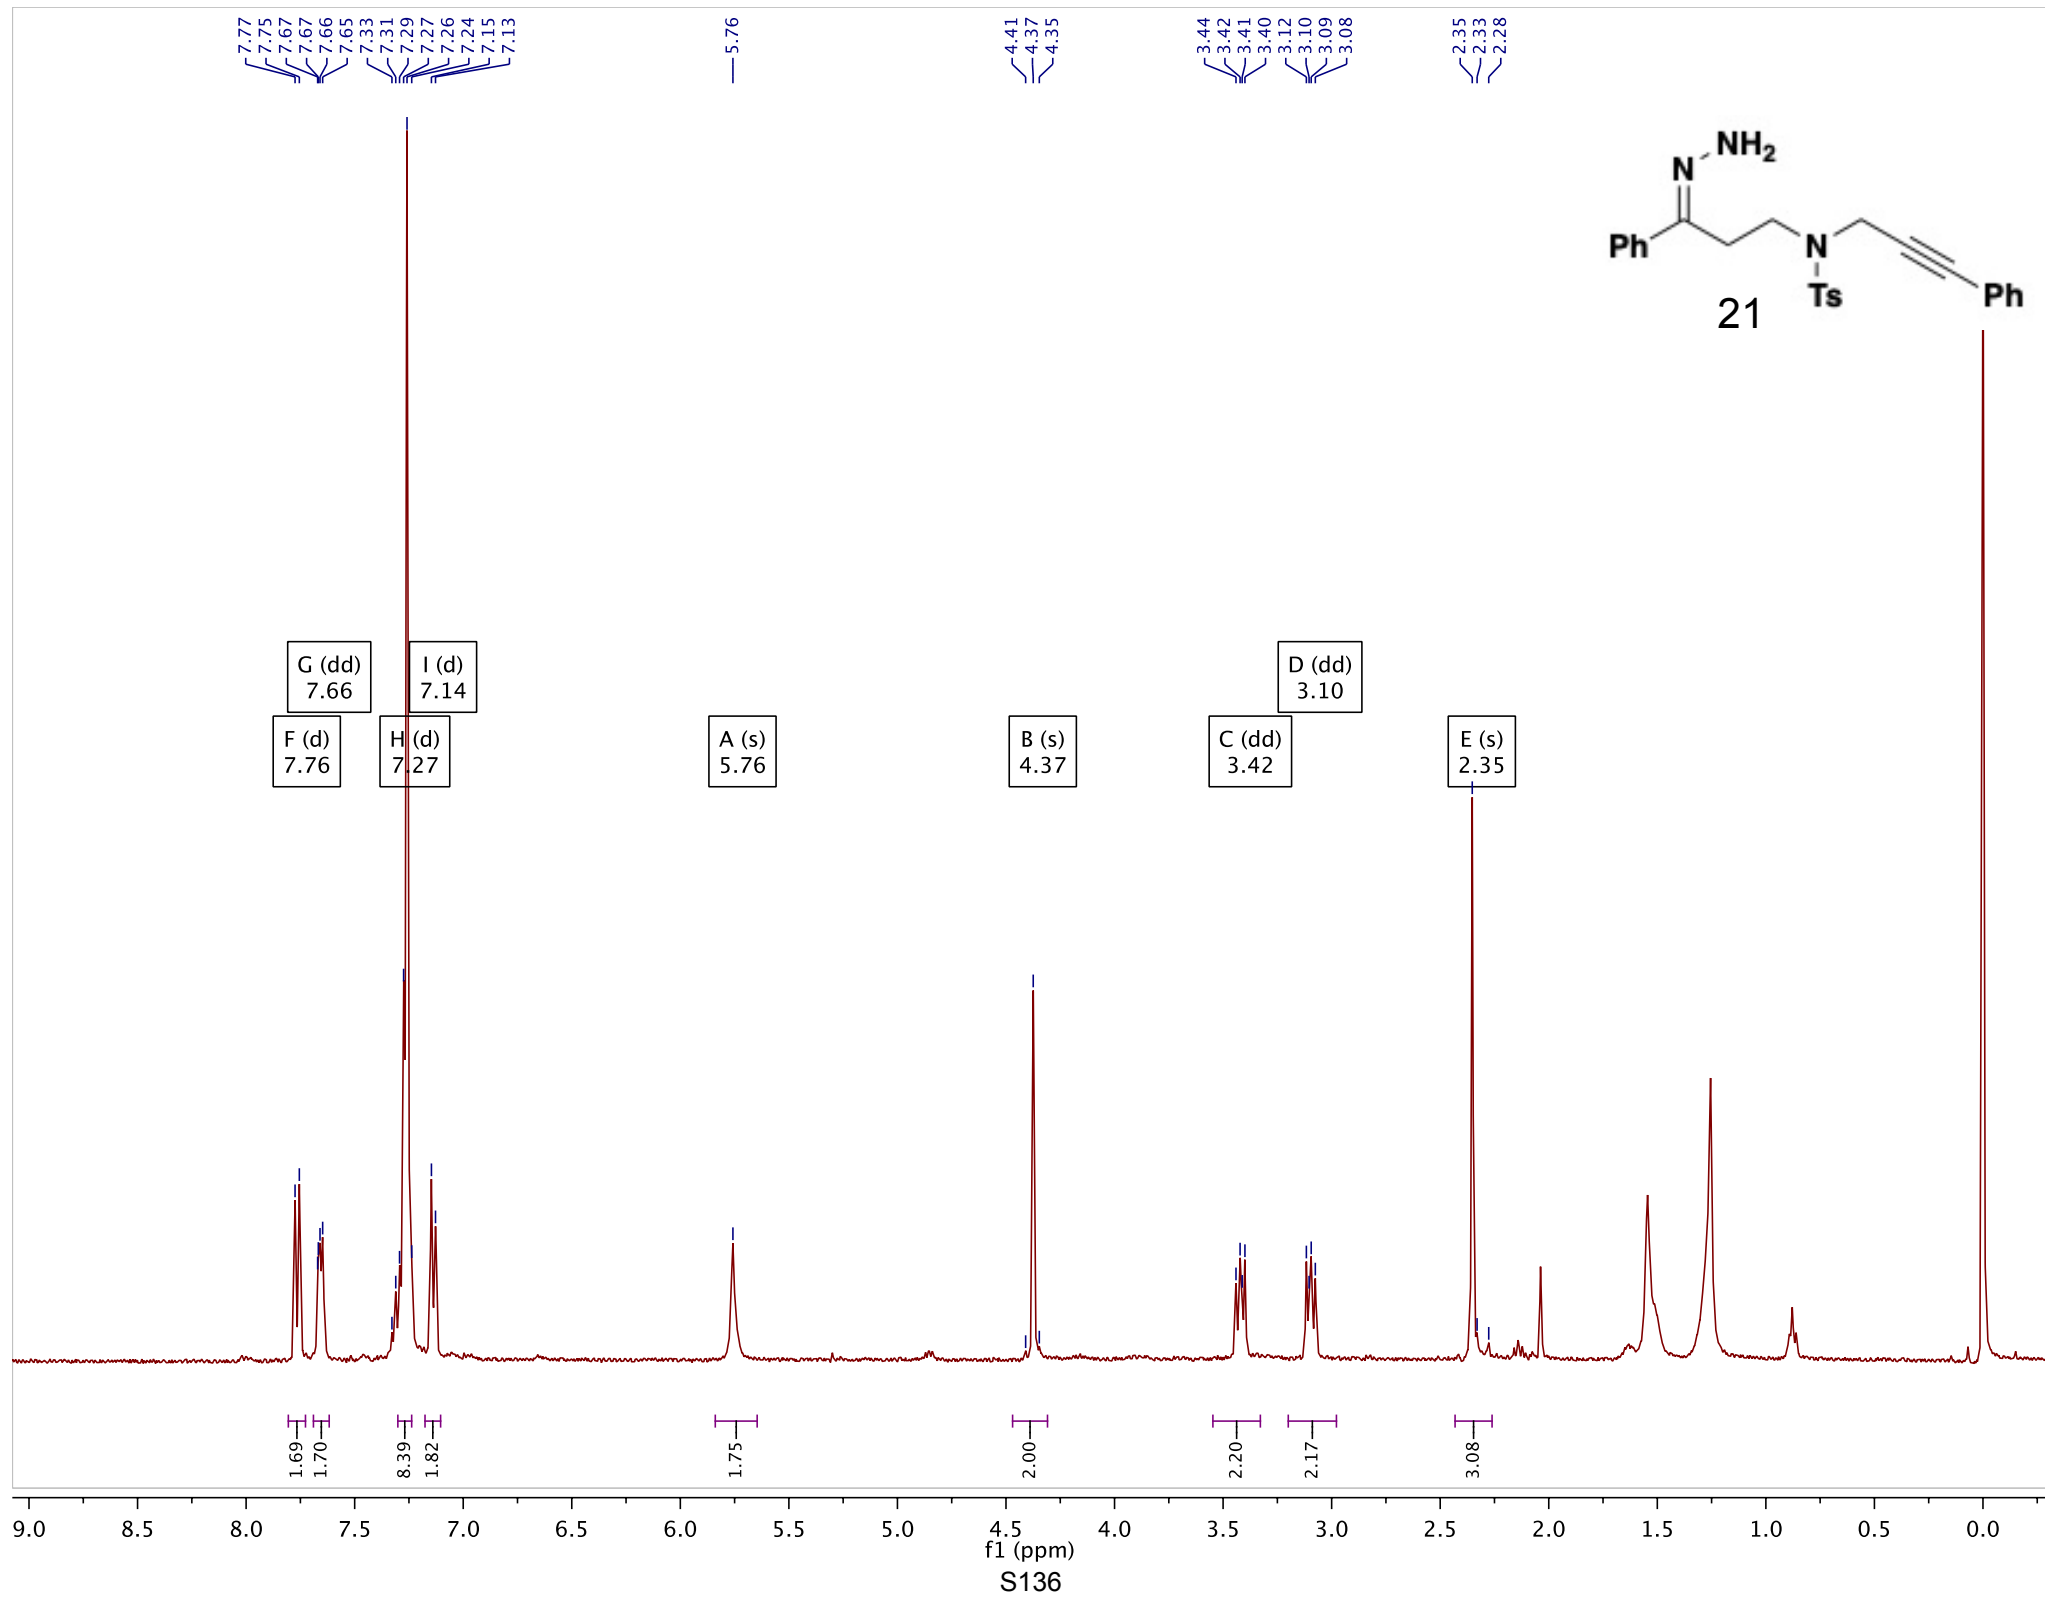



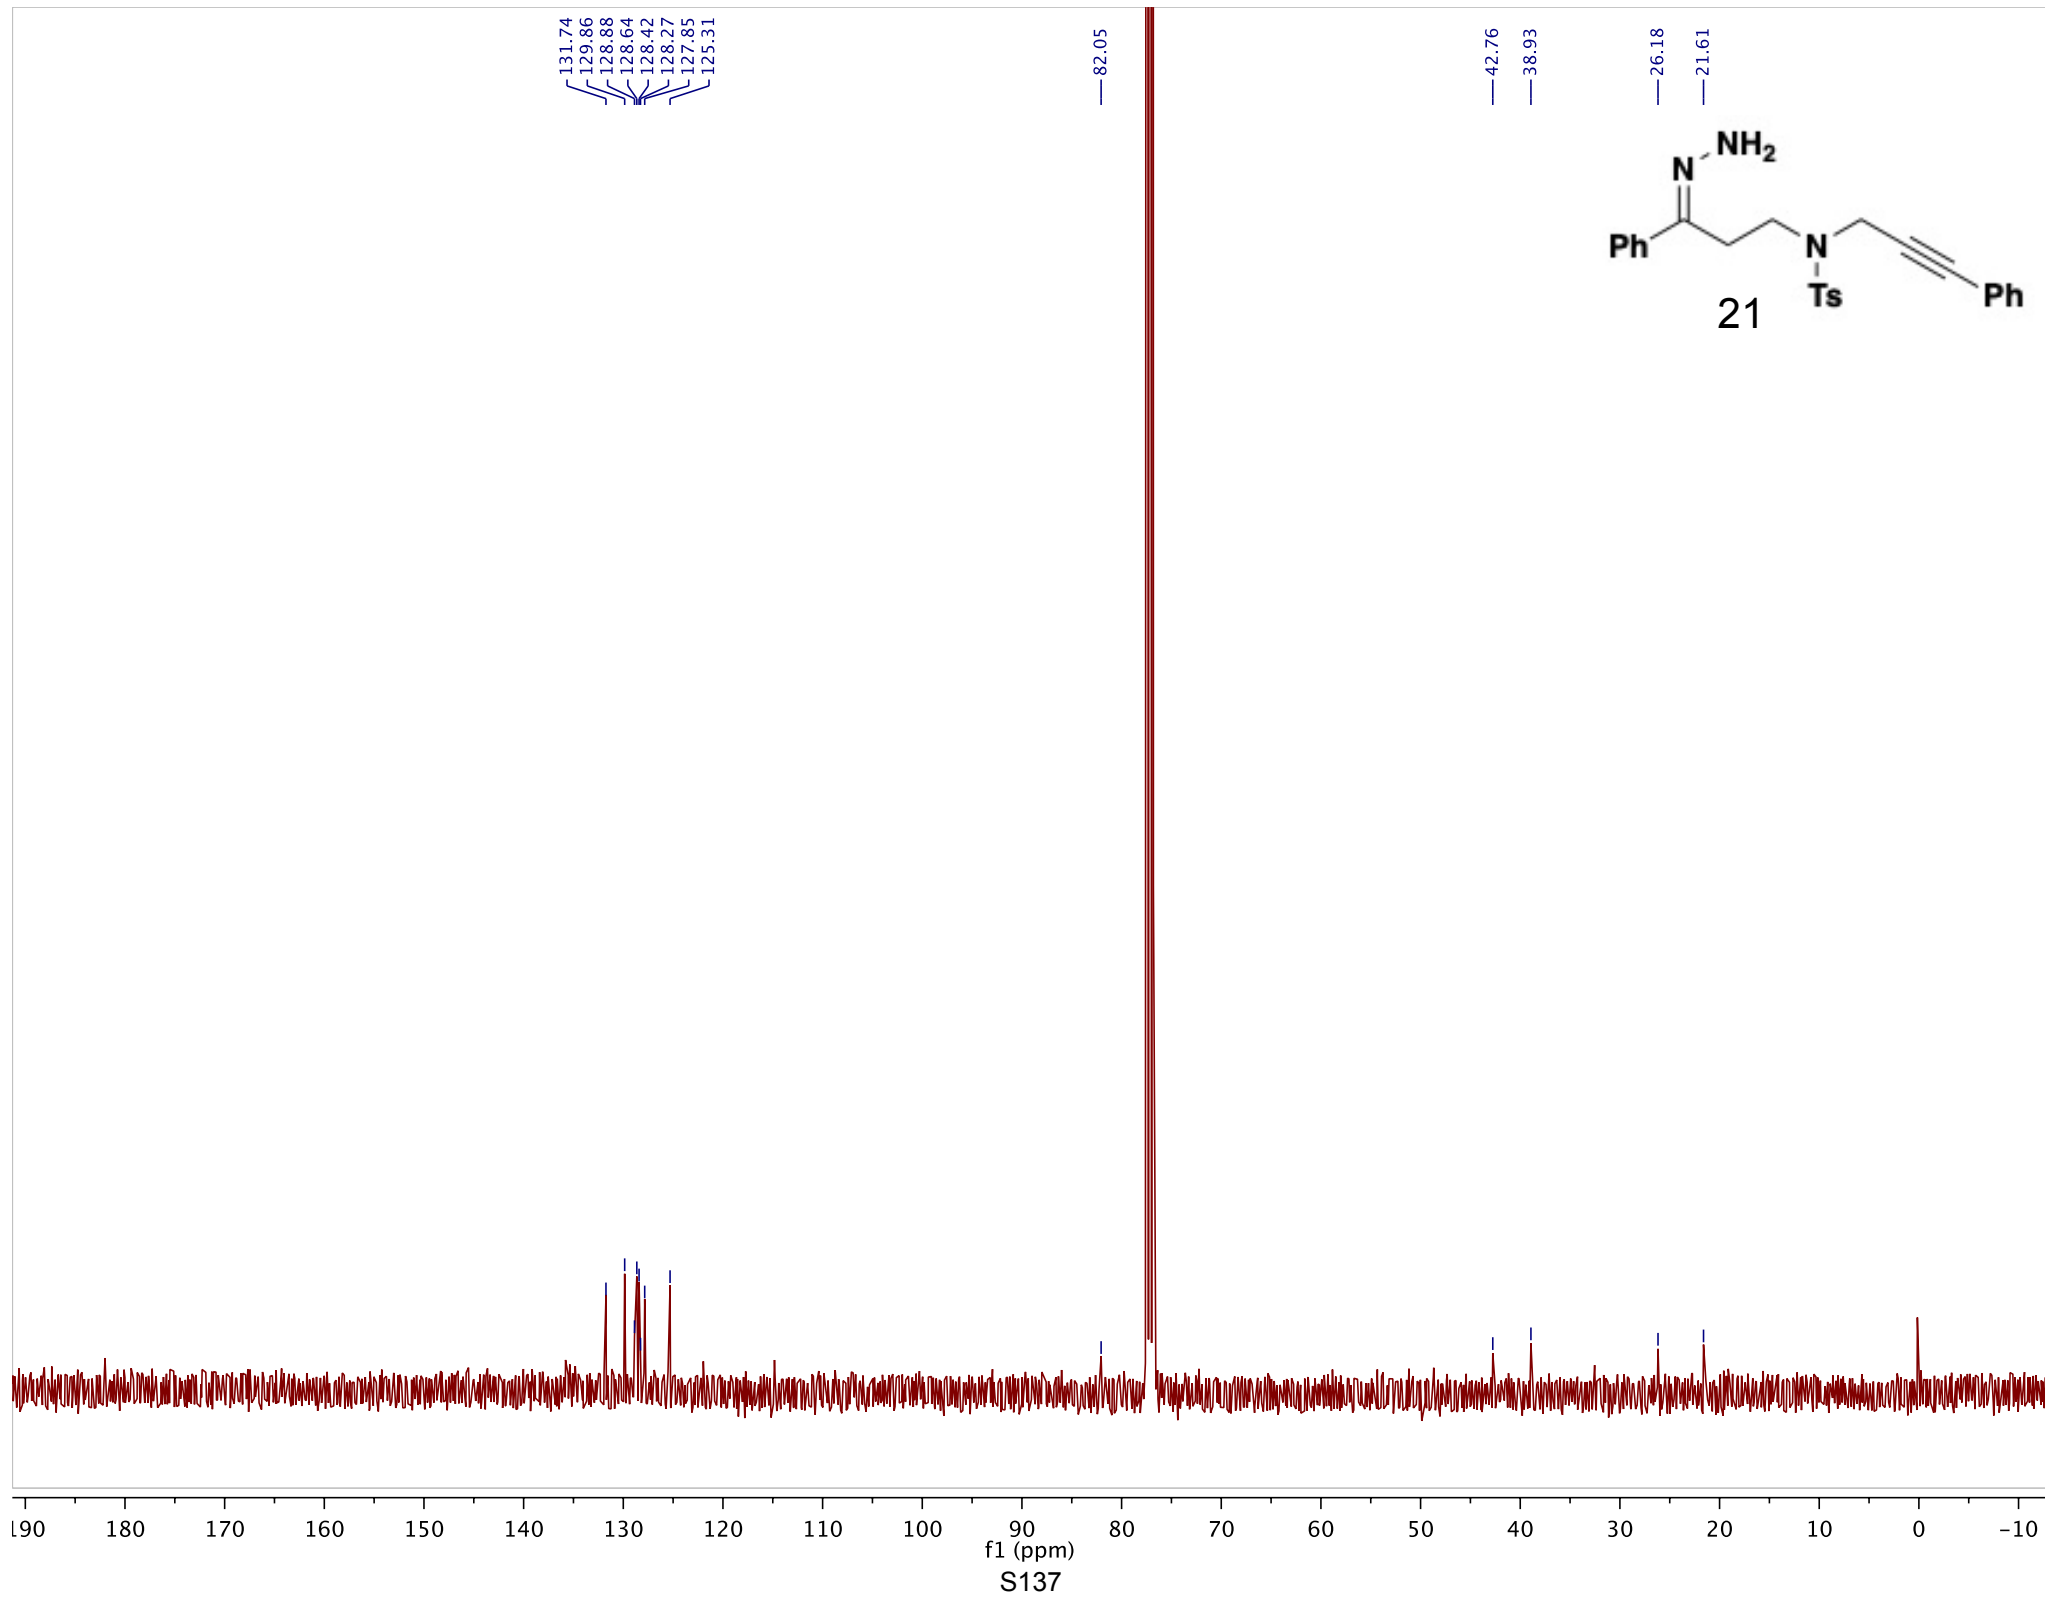

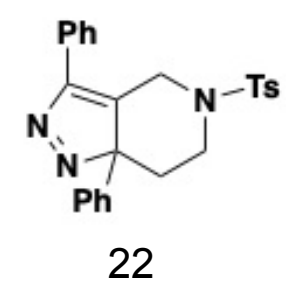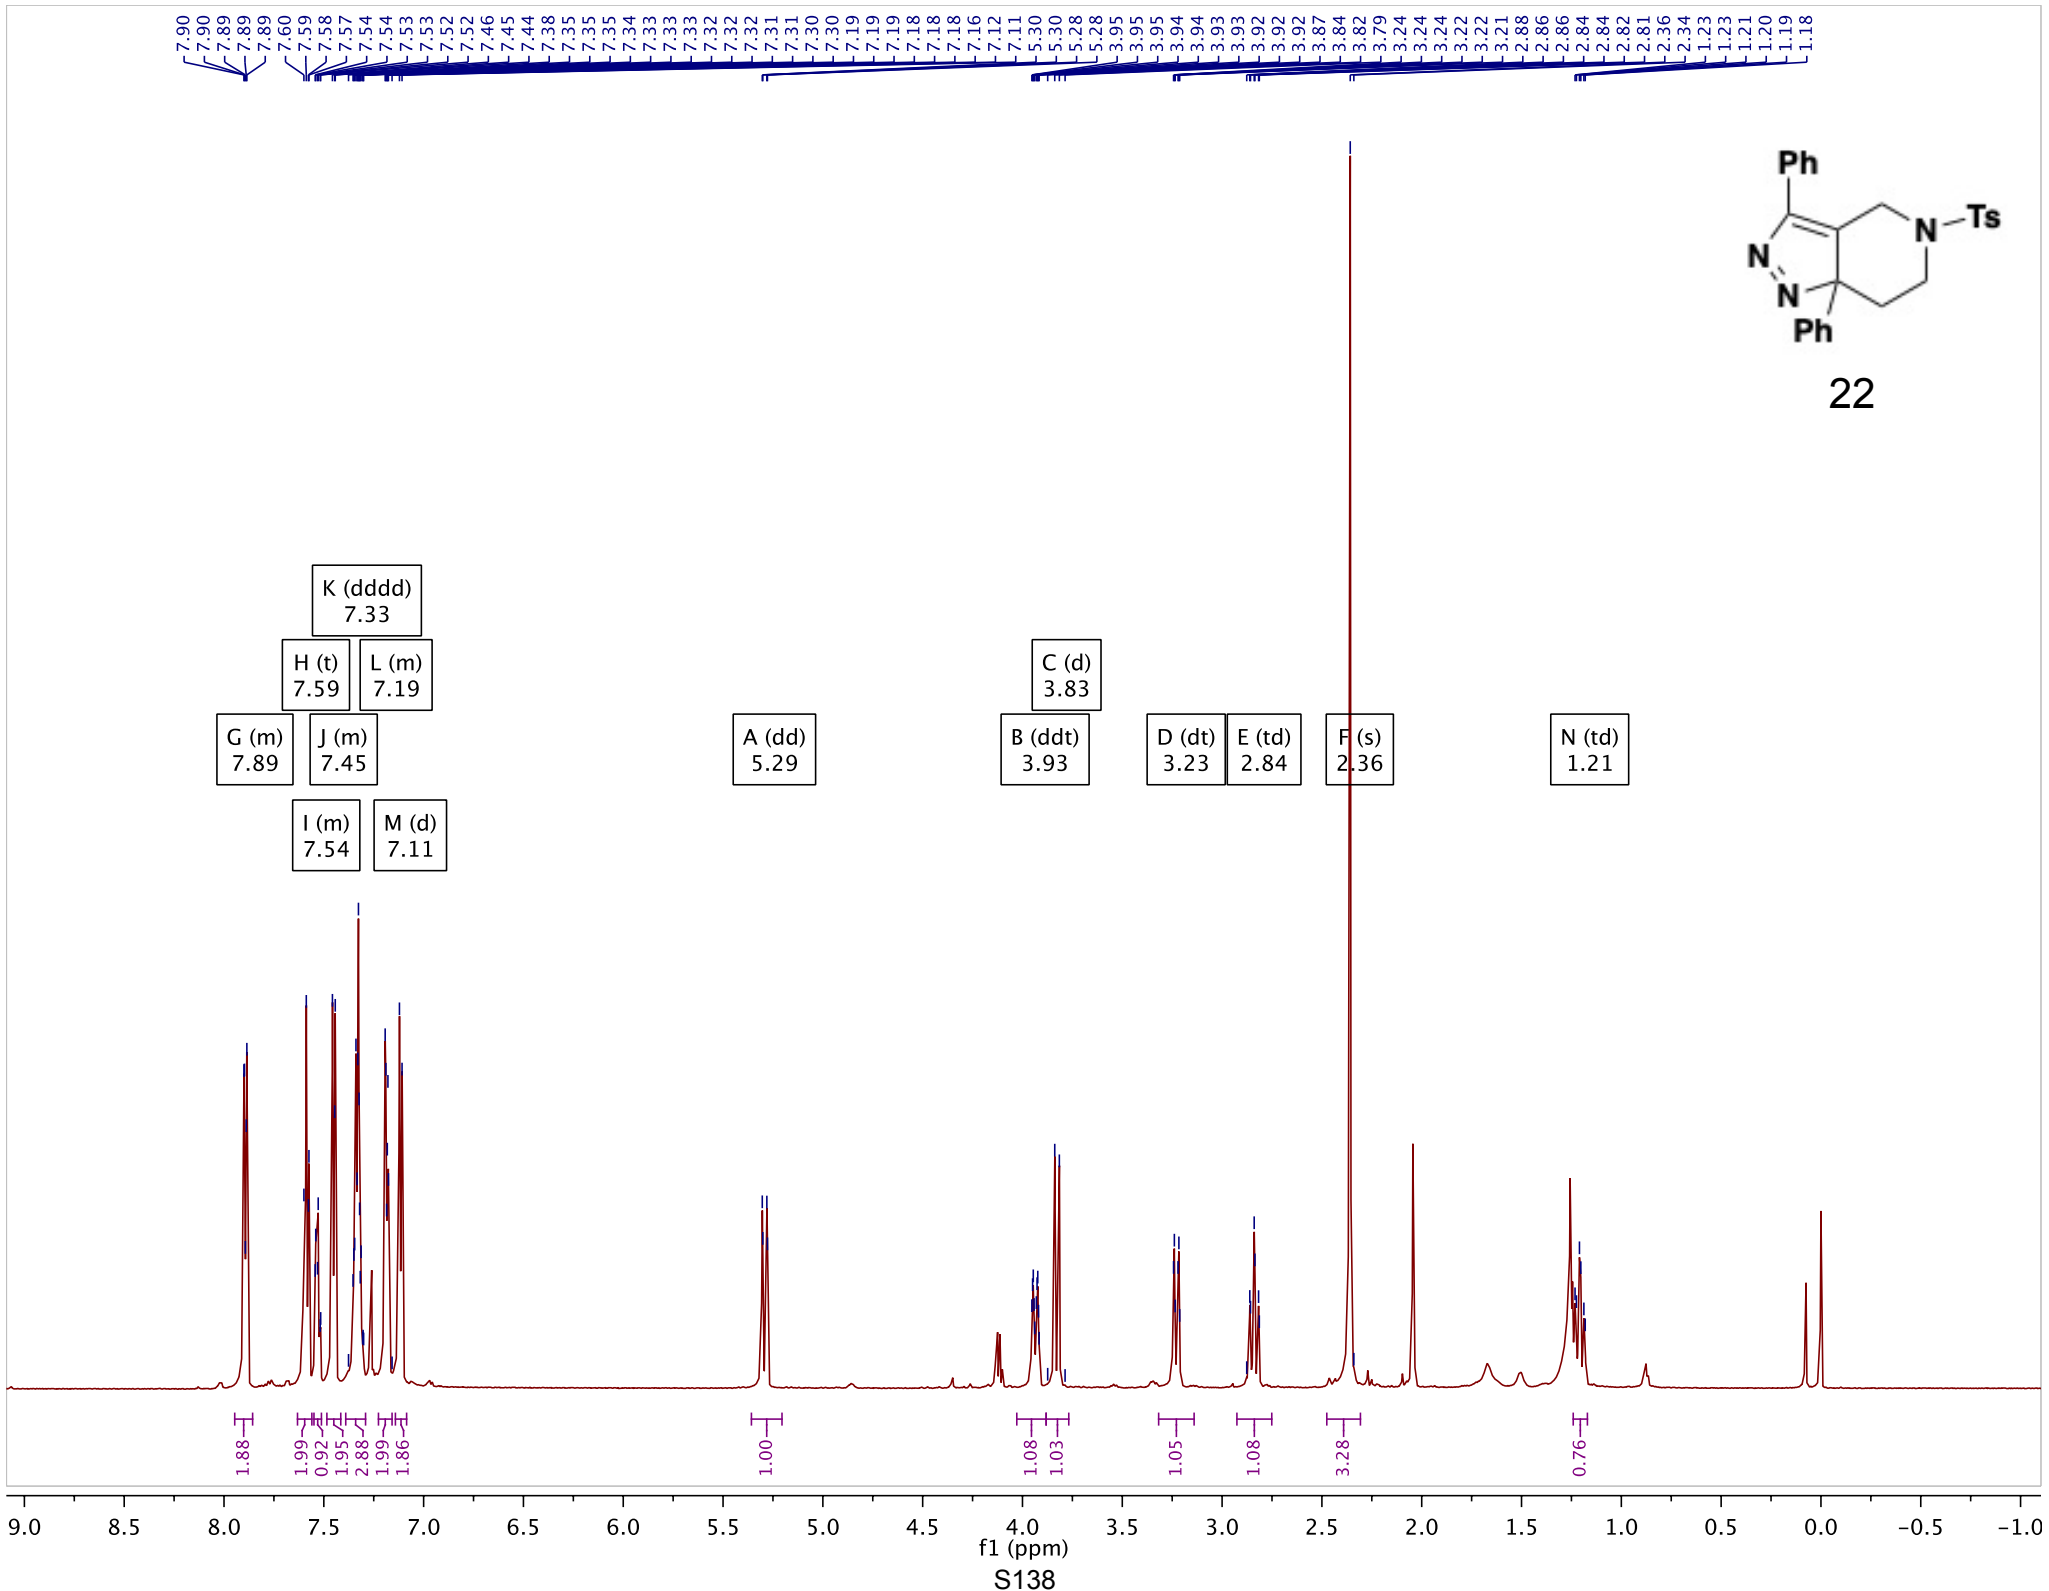

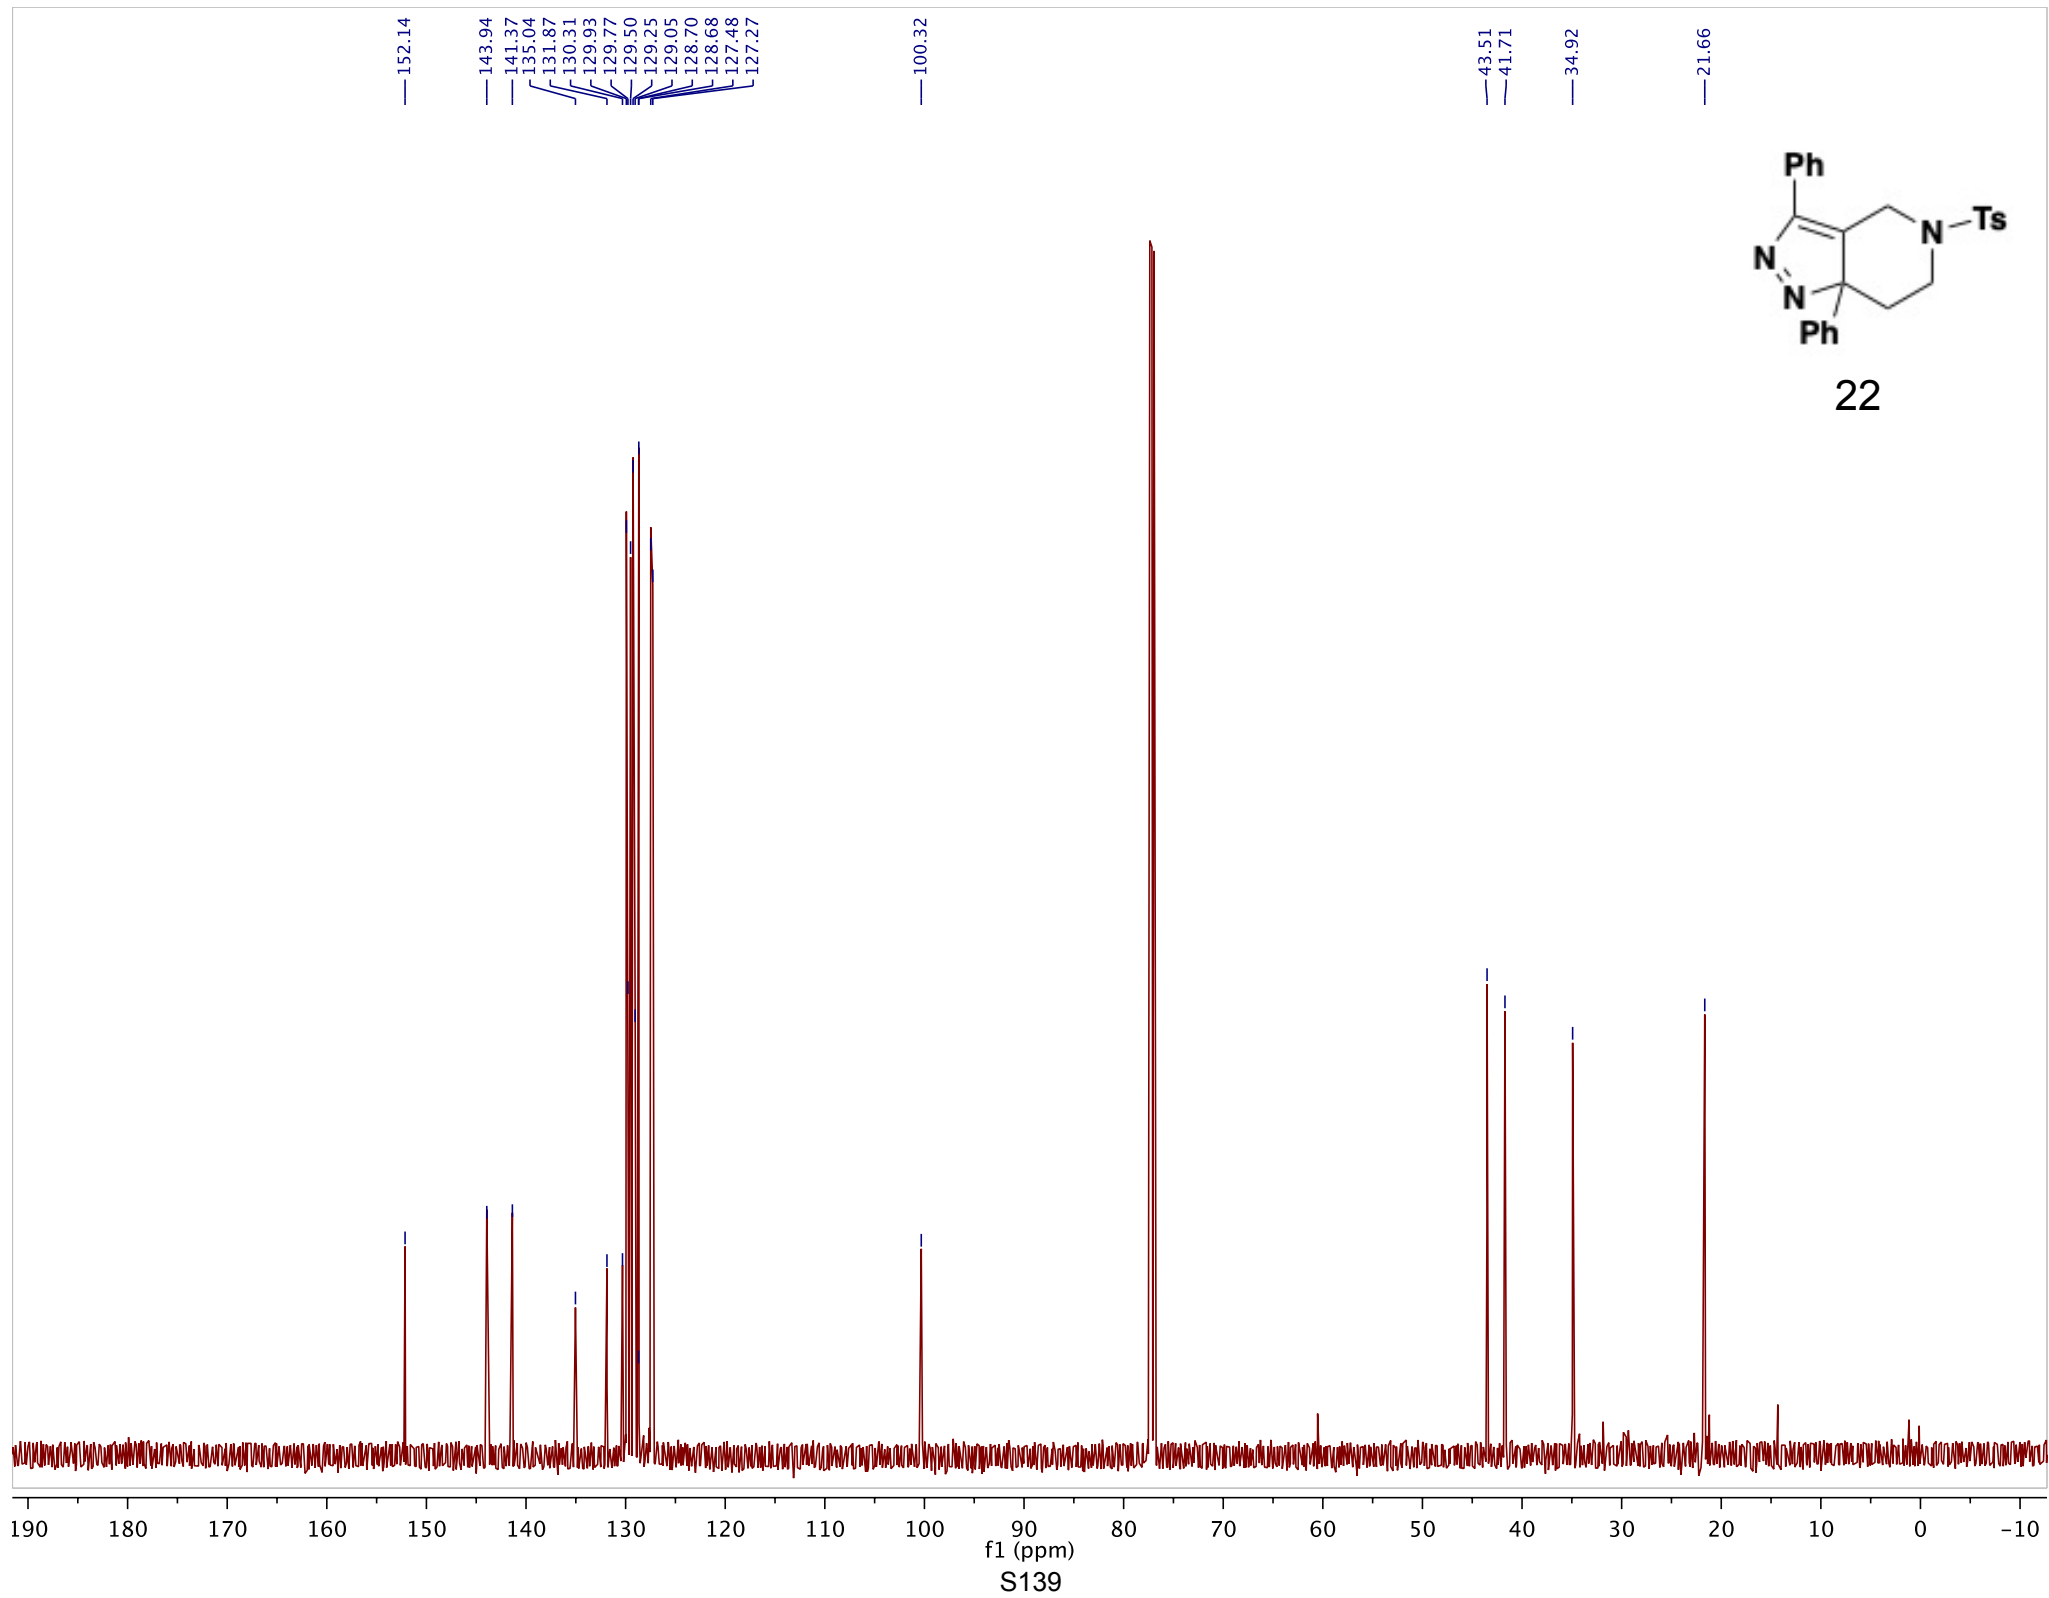

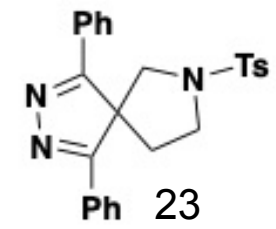

7.68  
7.67  
7.38  
7.37  
7.37  
7.29  
7.28  
7.27  
7.26  
7.24  
7.23  
7.22  
7.14  
7.13  
7.08  
7.07  
7.06  
6.94  
6.93  
5.66  
5.65

3.77  
3.75  
3.74

2.67  
2.66  
2.65  
2.37

F (d) 7.67  
G (m) 7.24  
E (d) 6.93  
A (s) 5.65  
B (t) 3.75  
C (t) 2.66  
D (s) 2.37  
H (dd) 7.38

2.27  
2.43  
7.06  
2.11  
2.00  
2.38  
2.31  
3.68

9.0 8.5 8.0 7.5 7.0 6.5 6.0 5.5 5.0 4.5 4.0 3.5 3.0 2.5 2.0 1.5 1.0 0.5 0.0 -0.5 -1.0

f1 (ppm)

S140

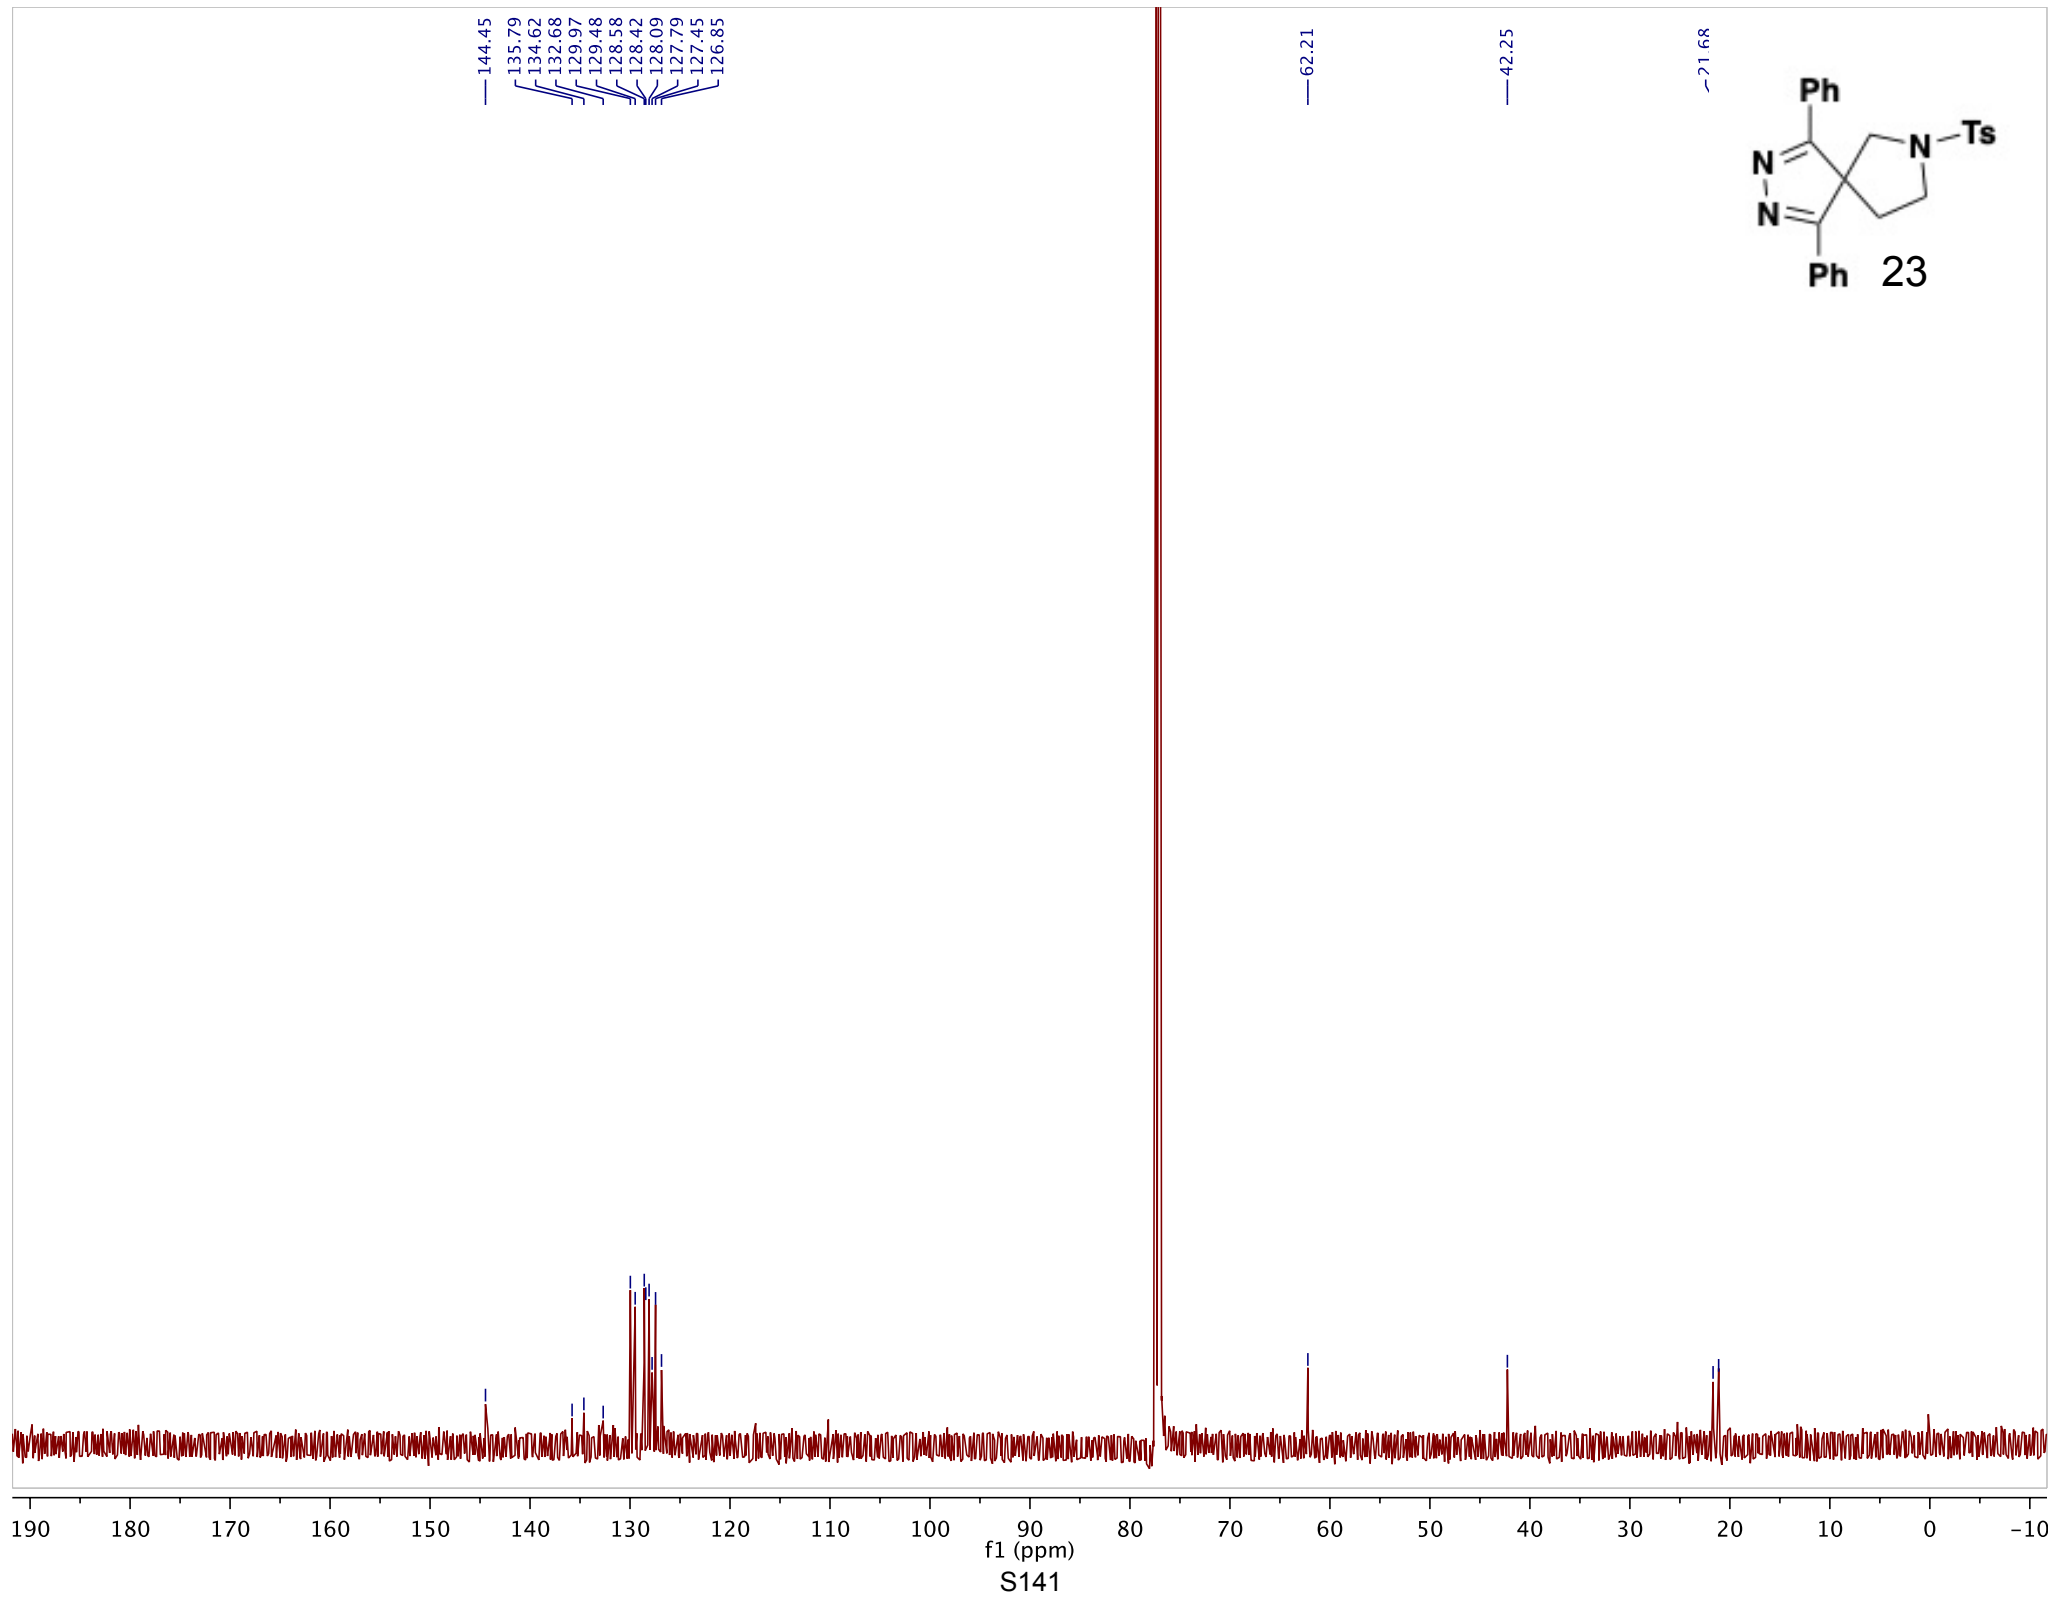

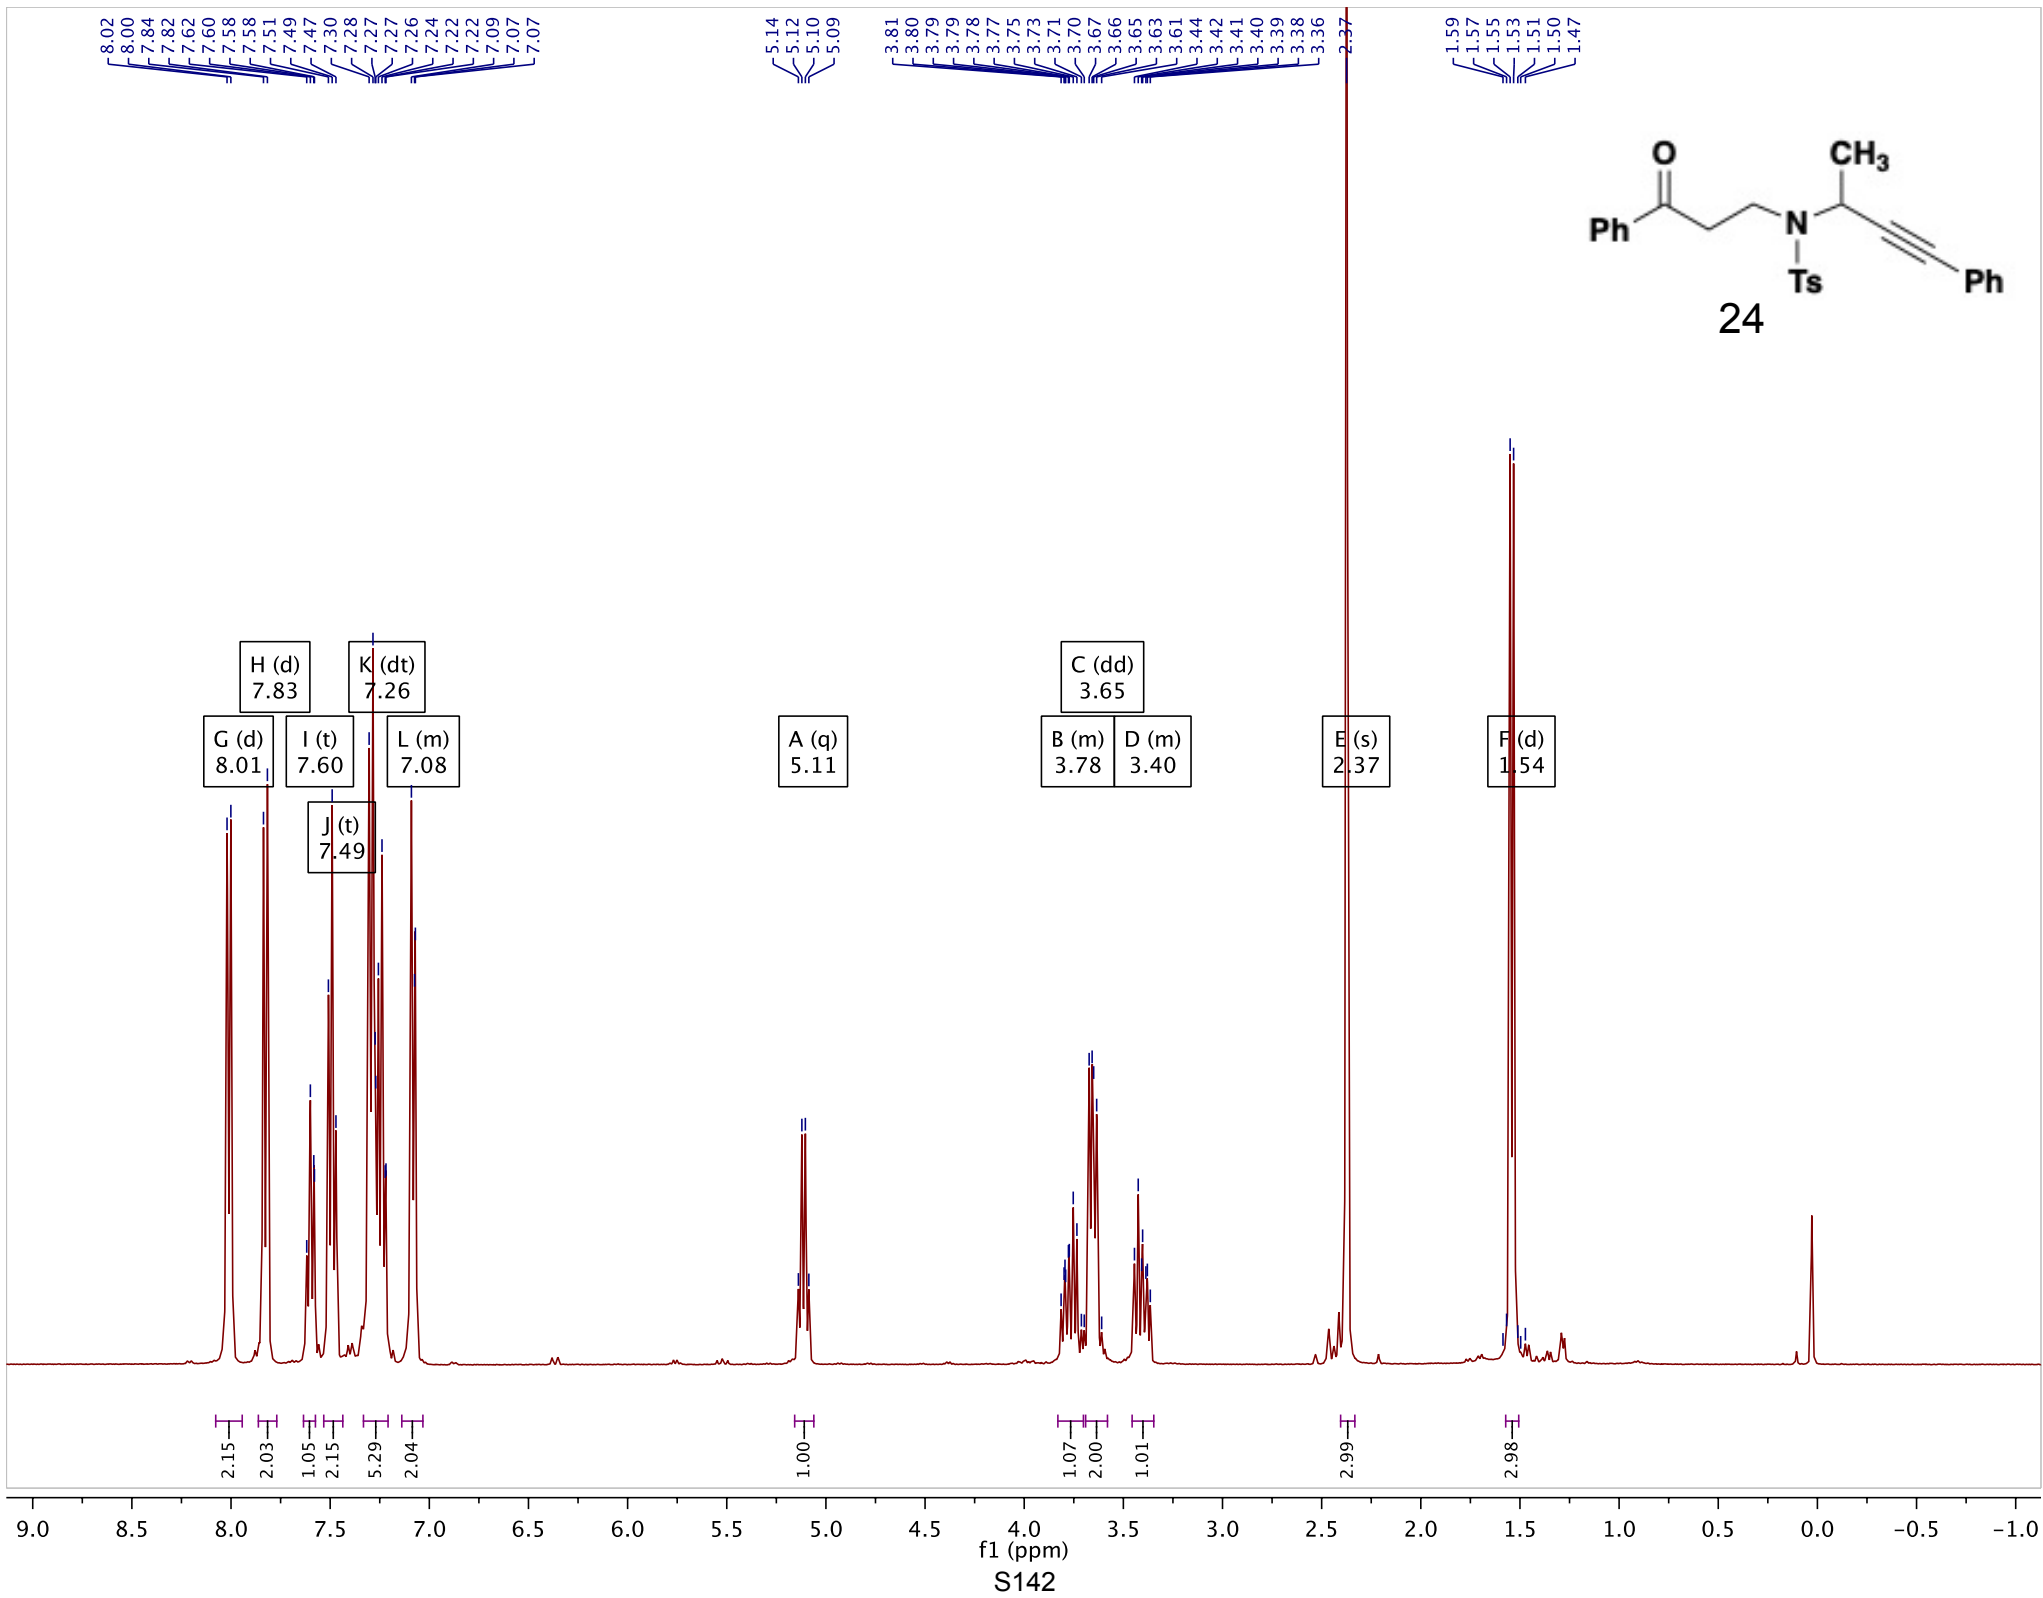

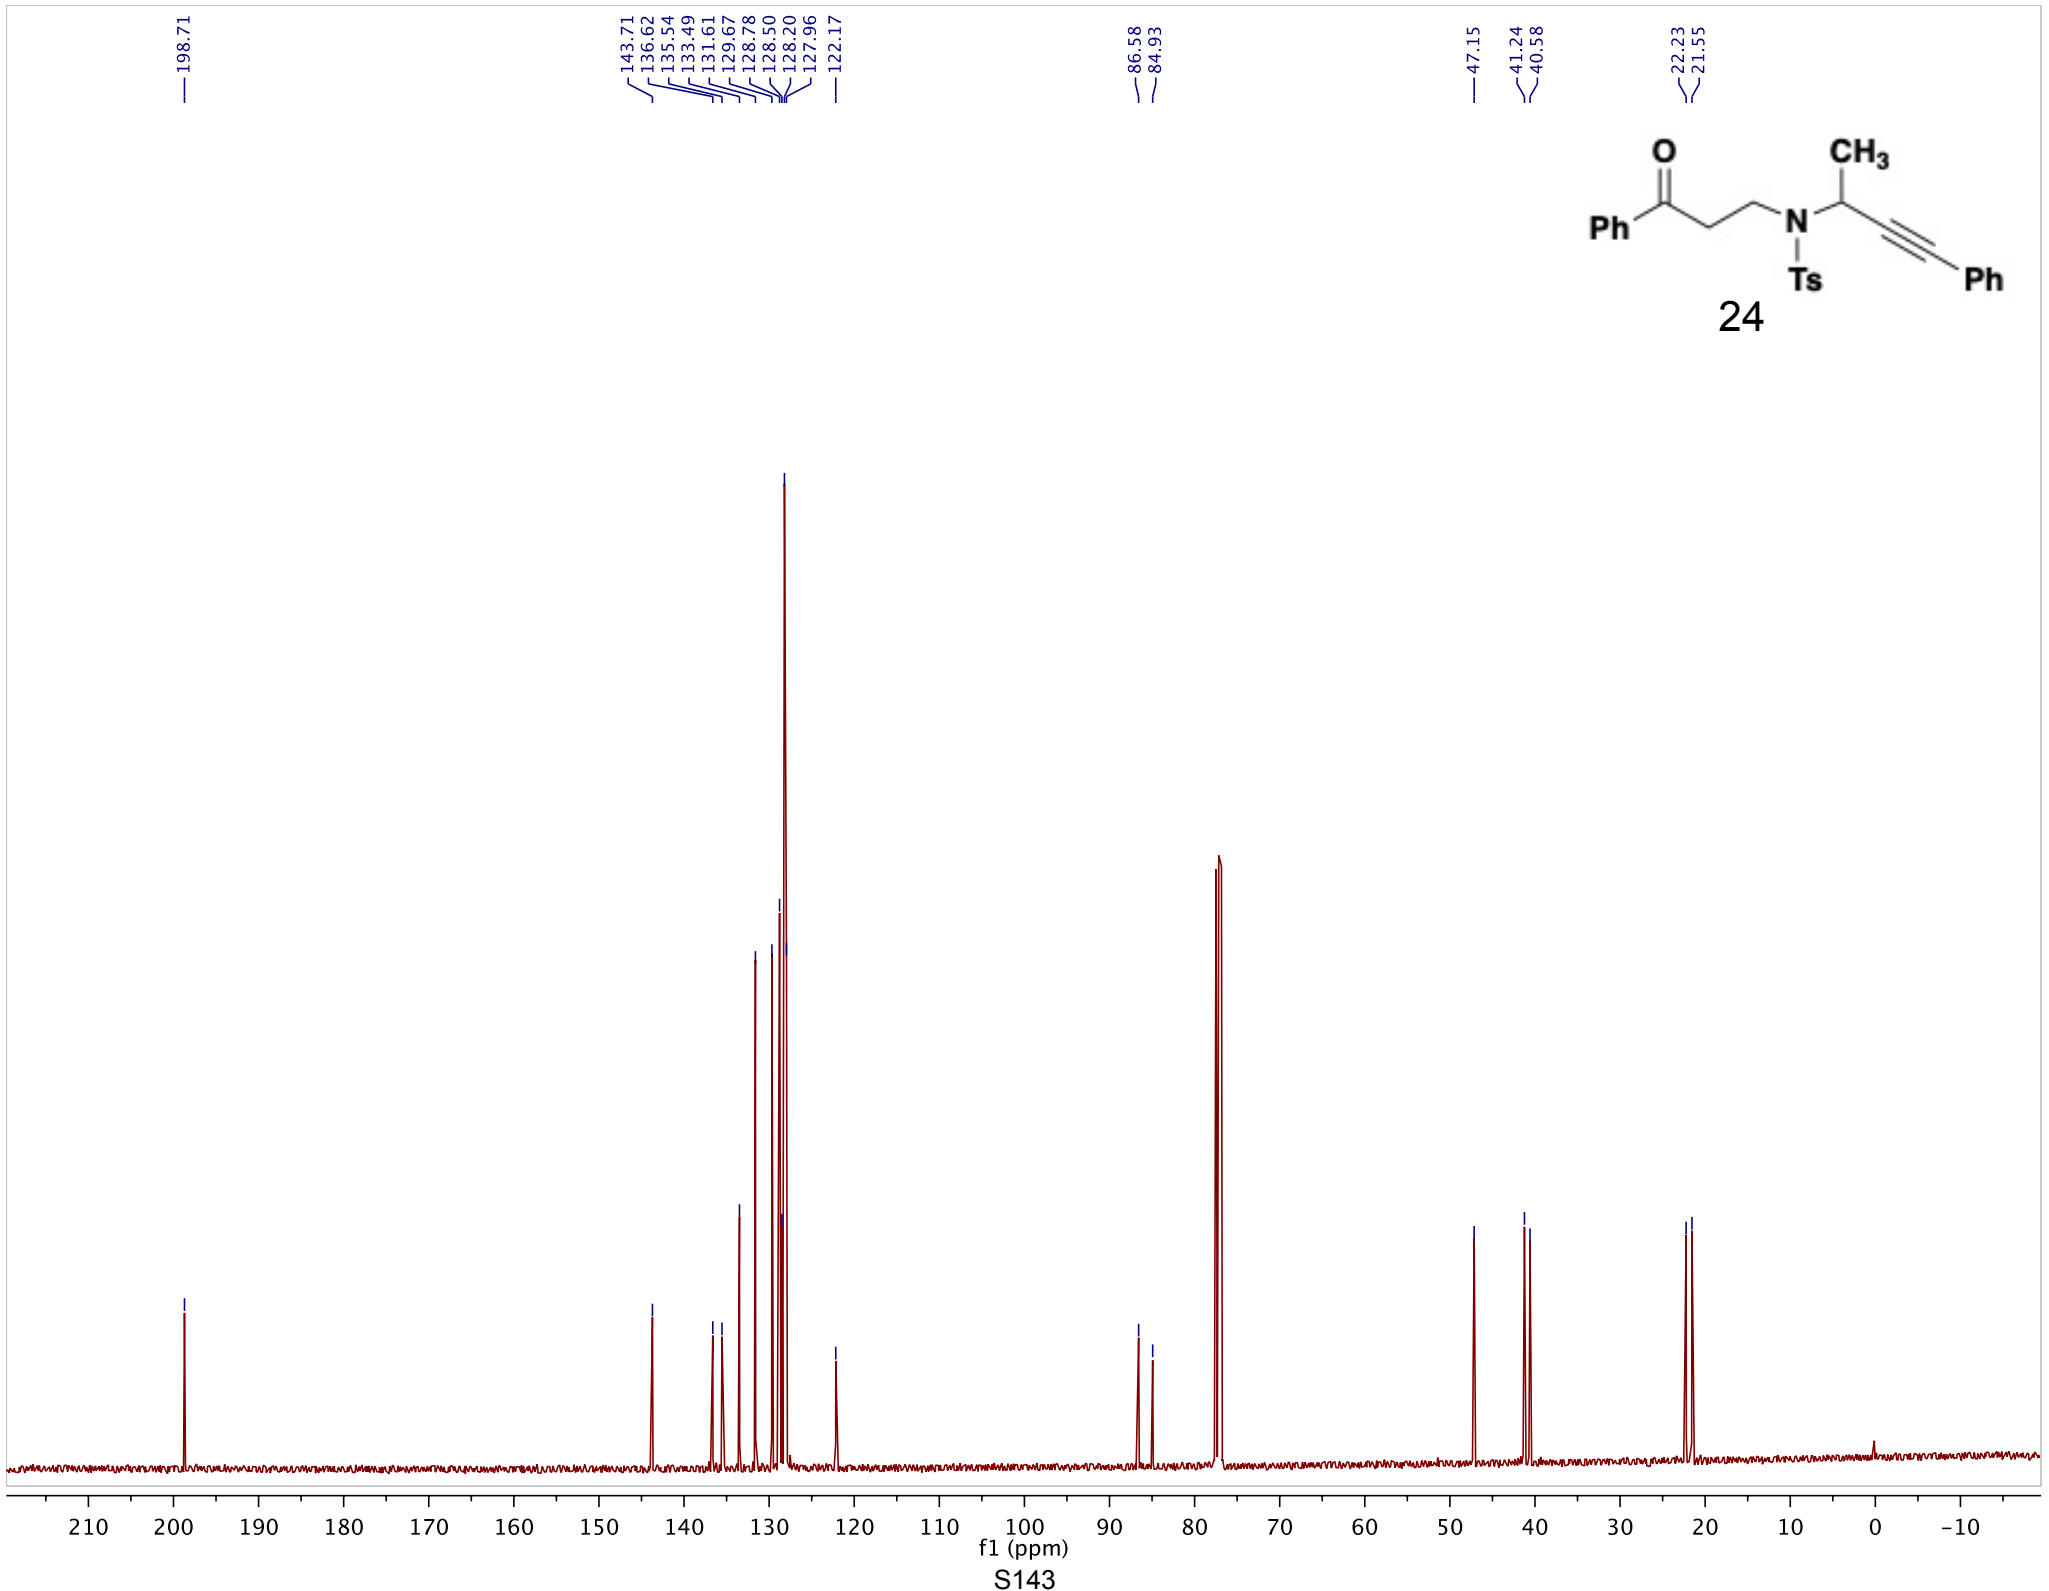

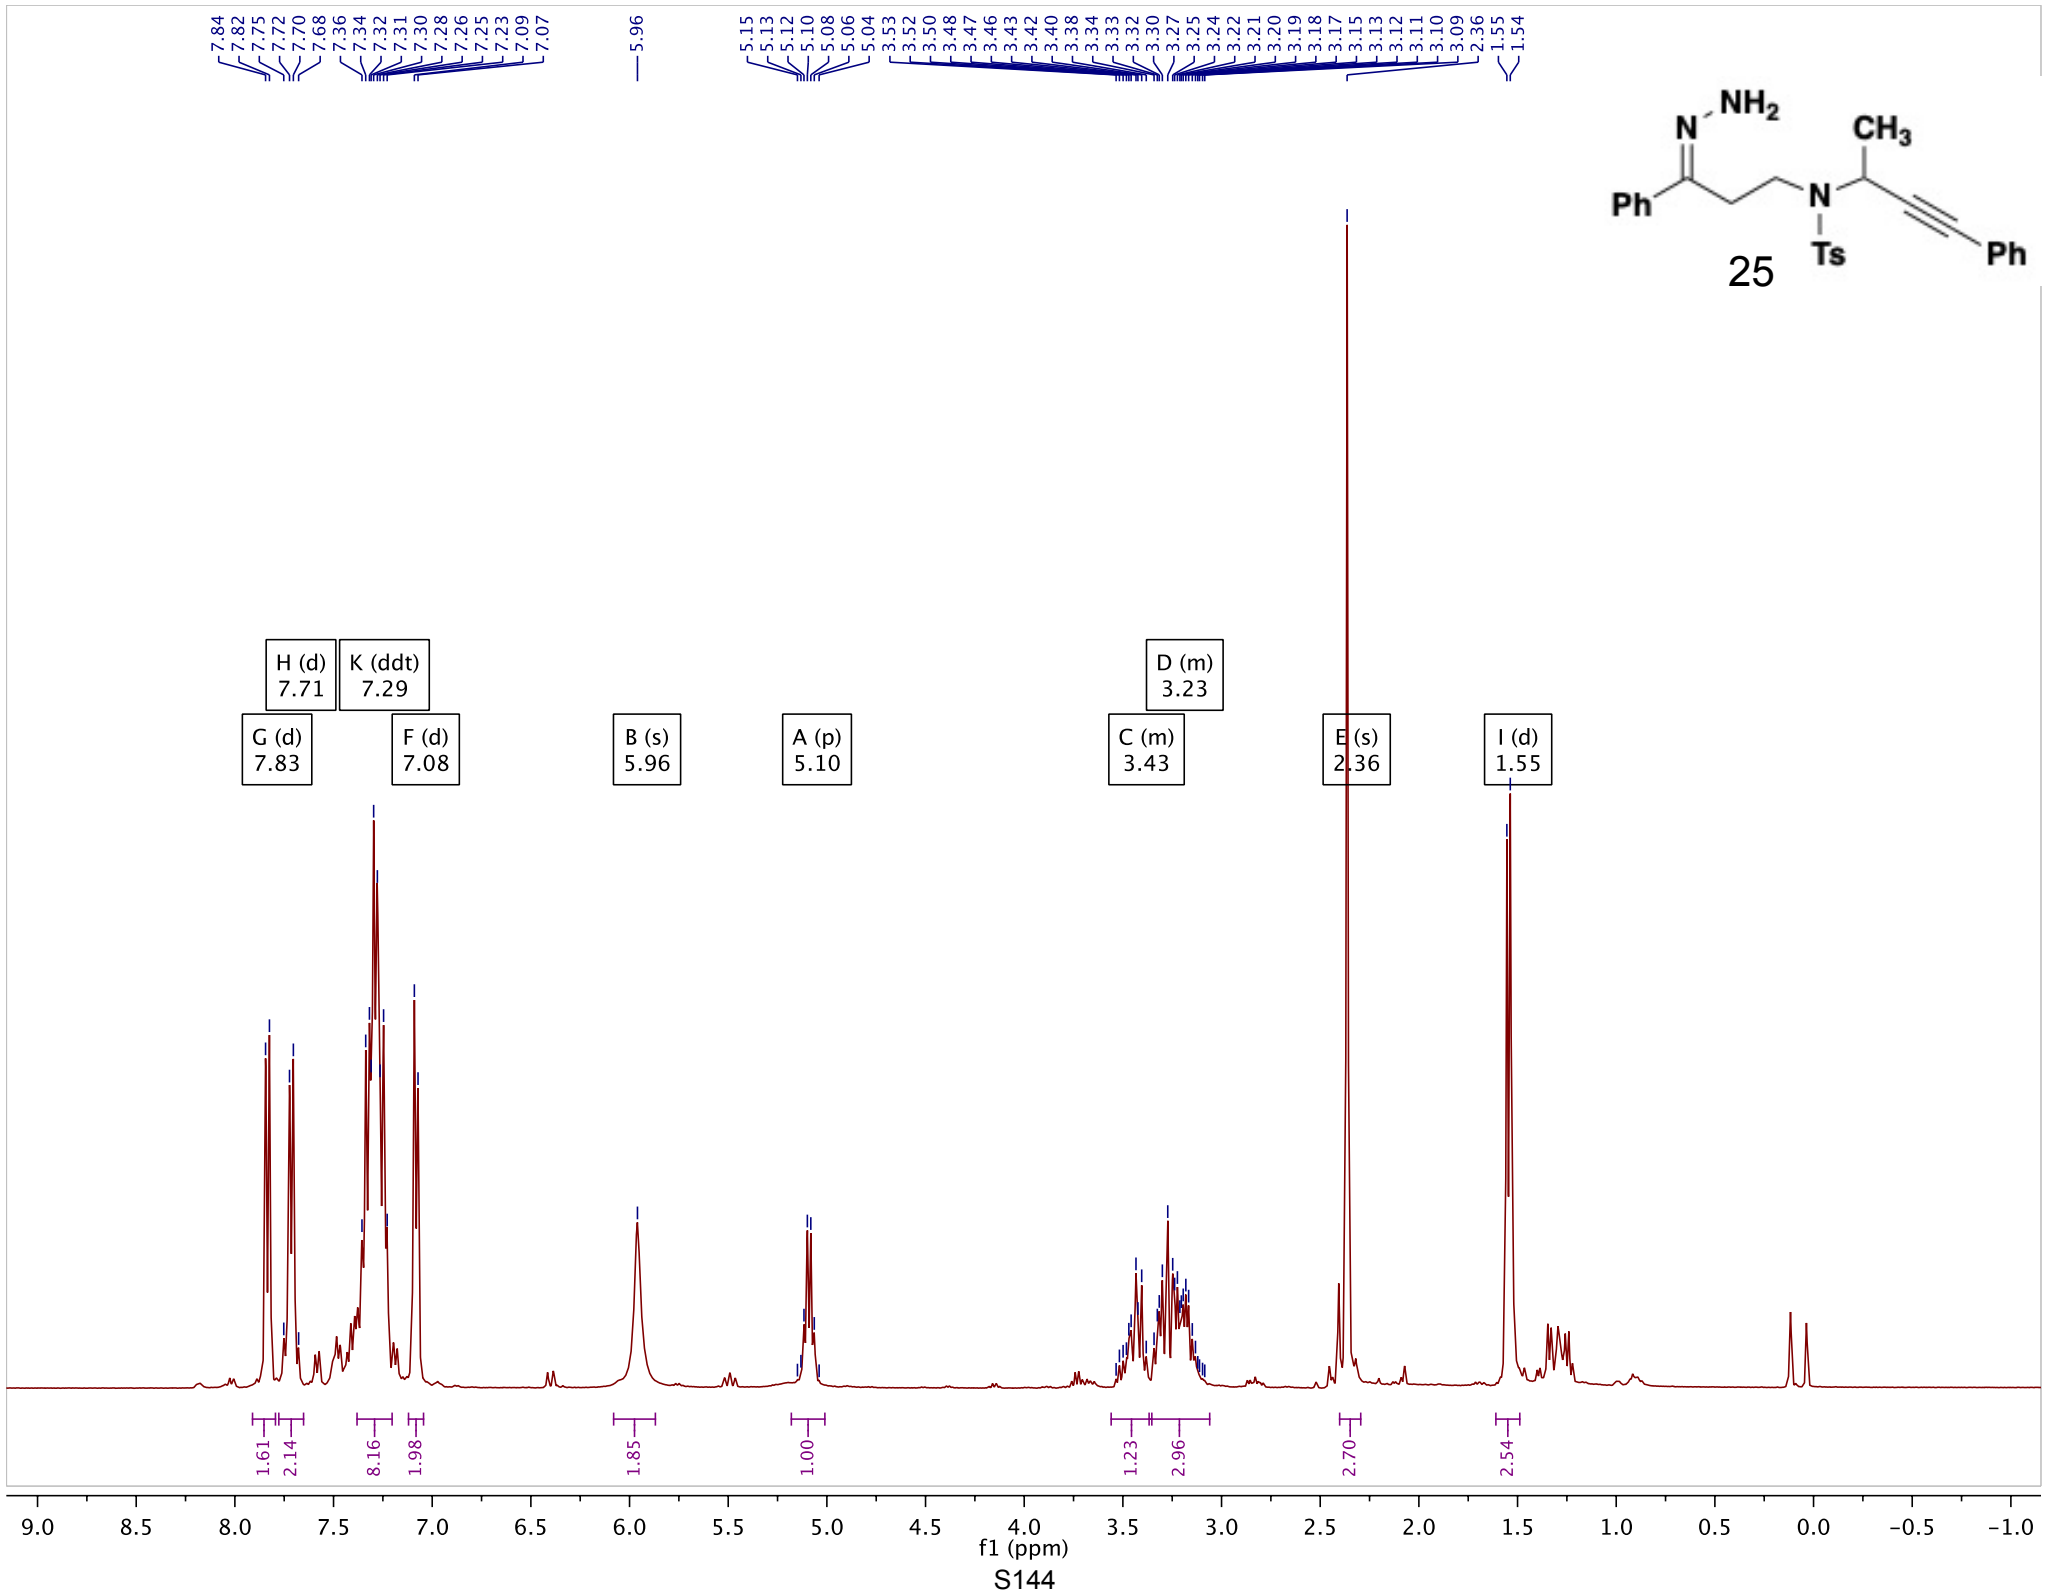



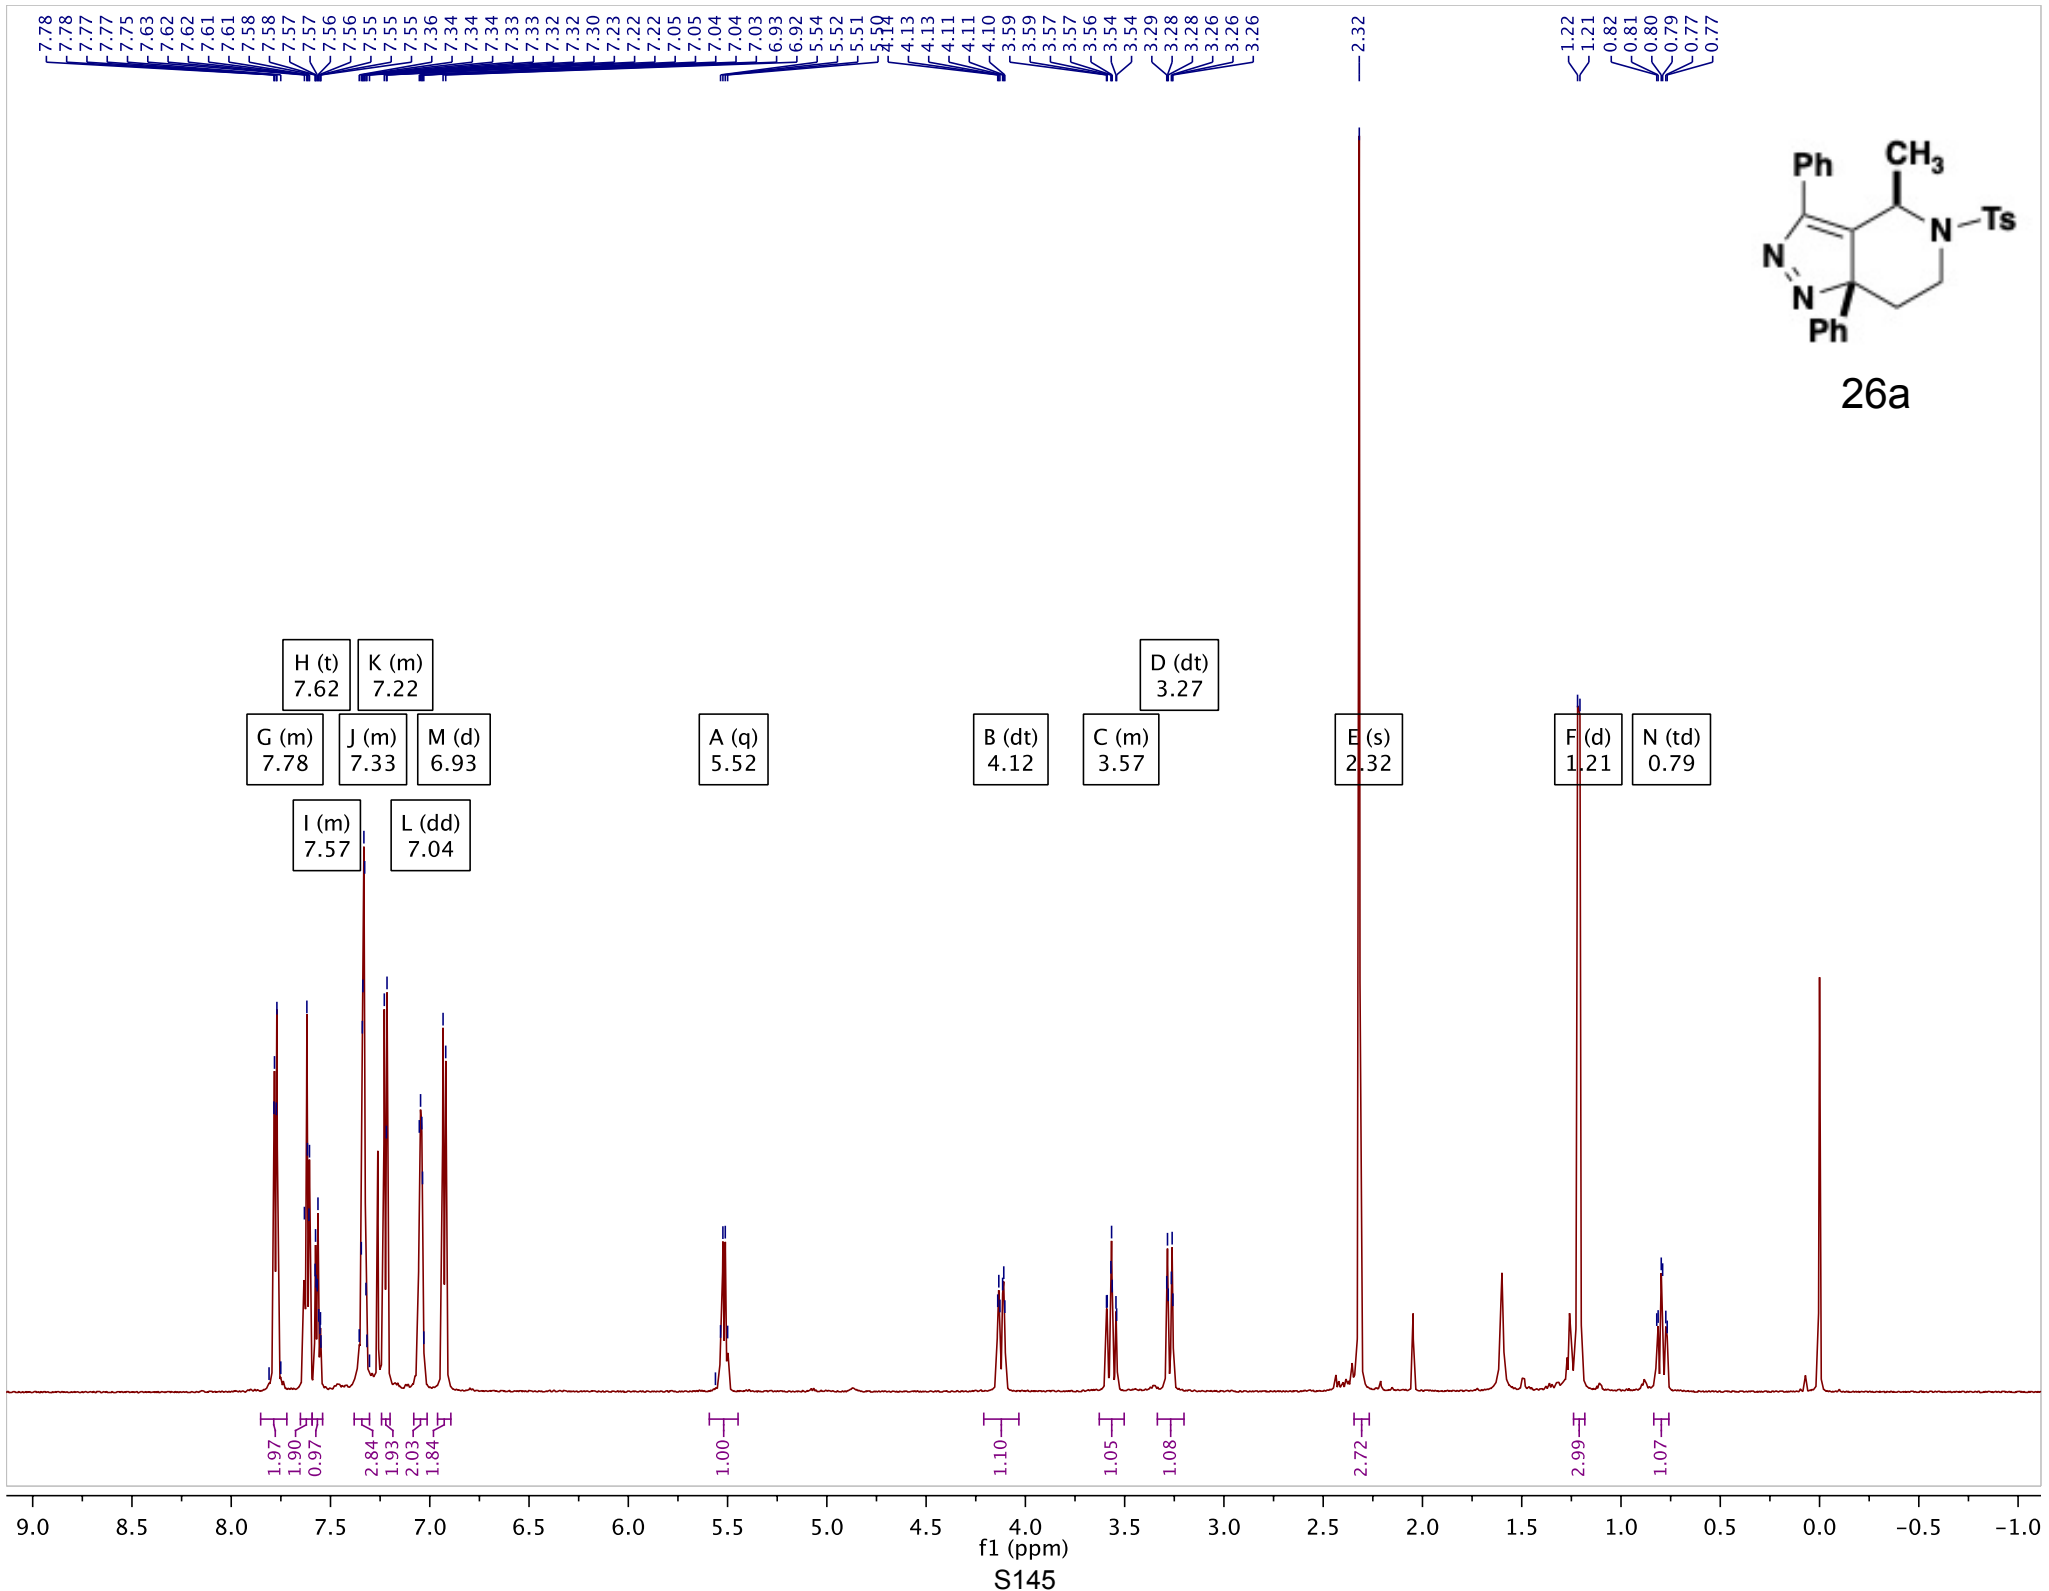

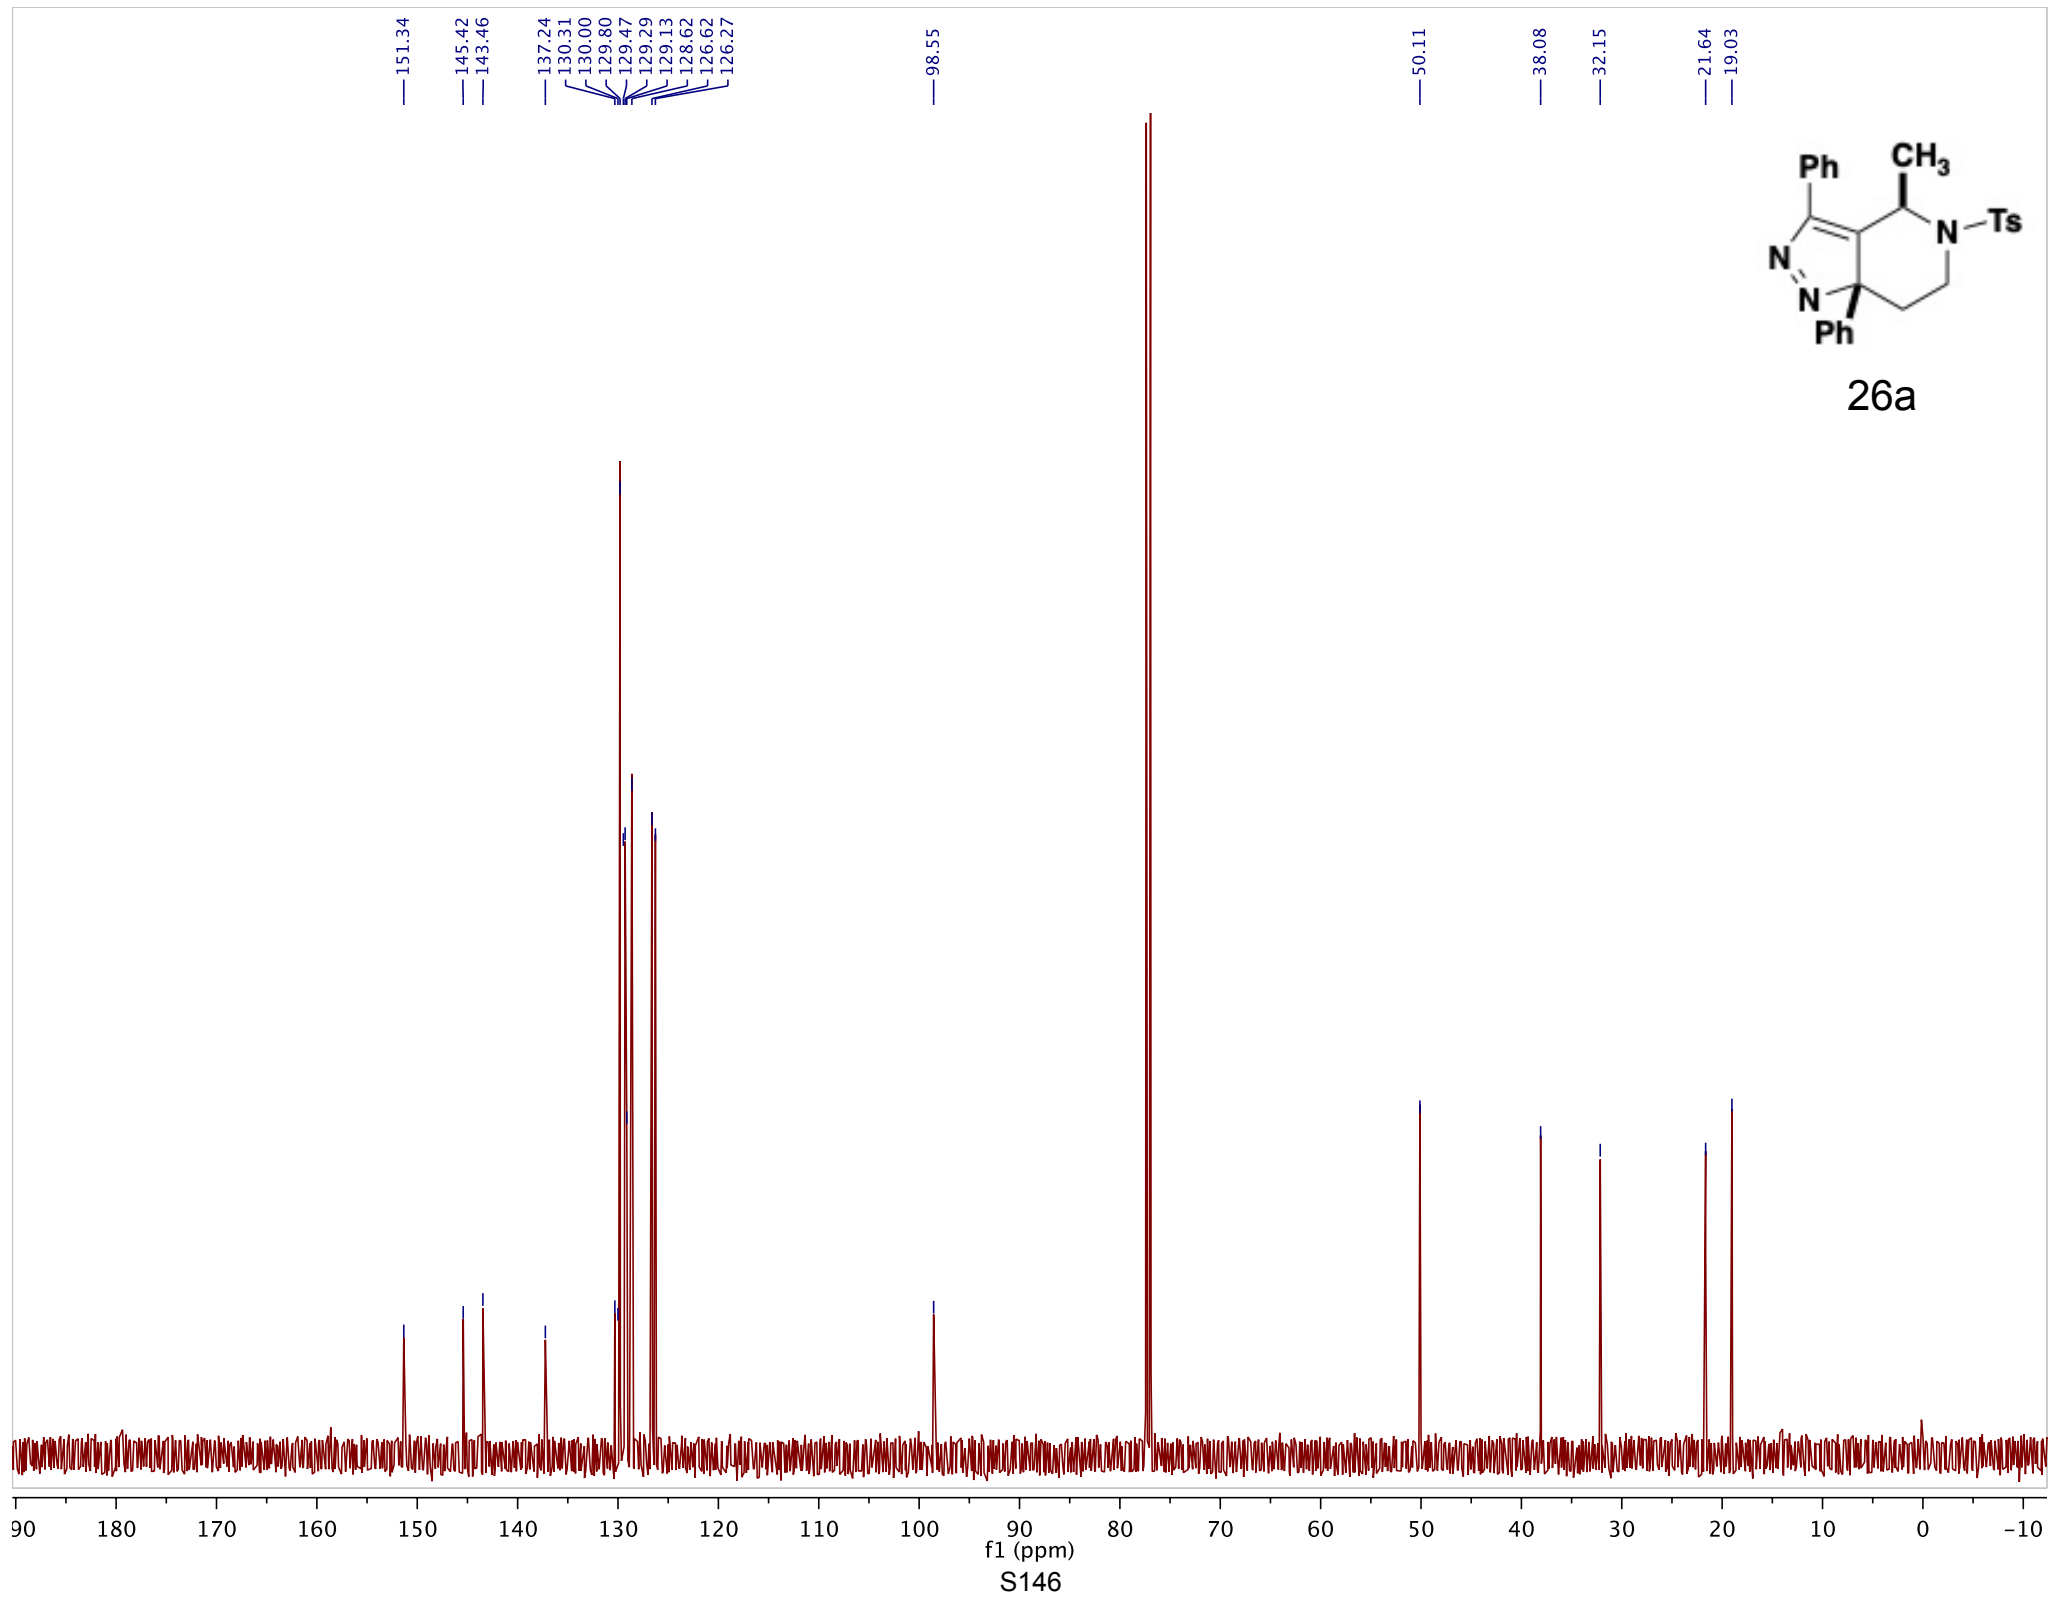

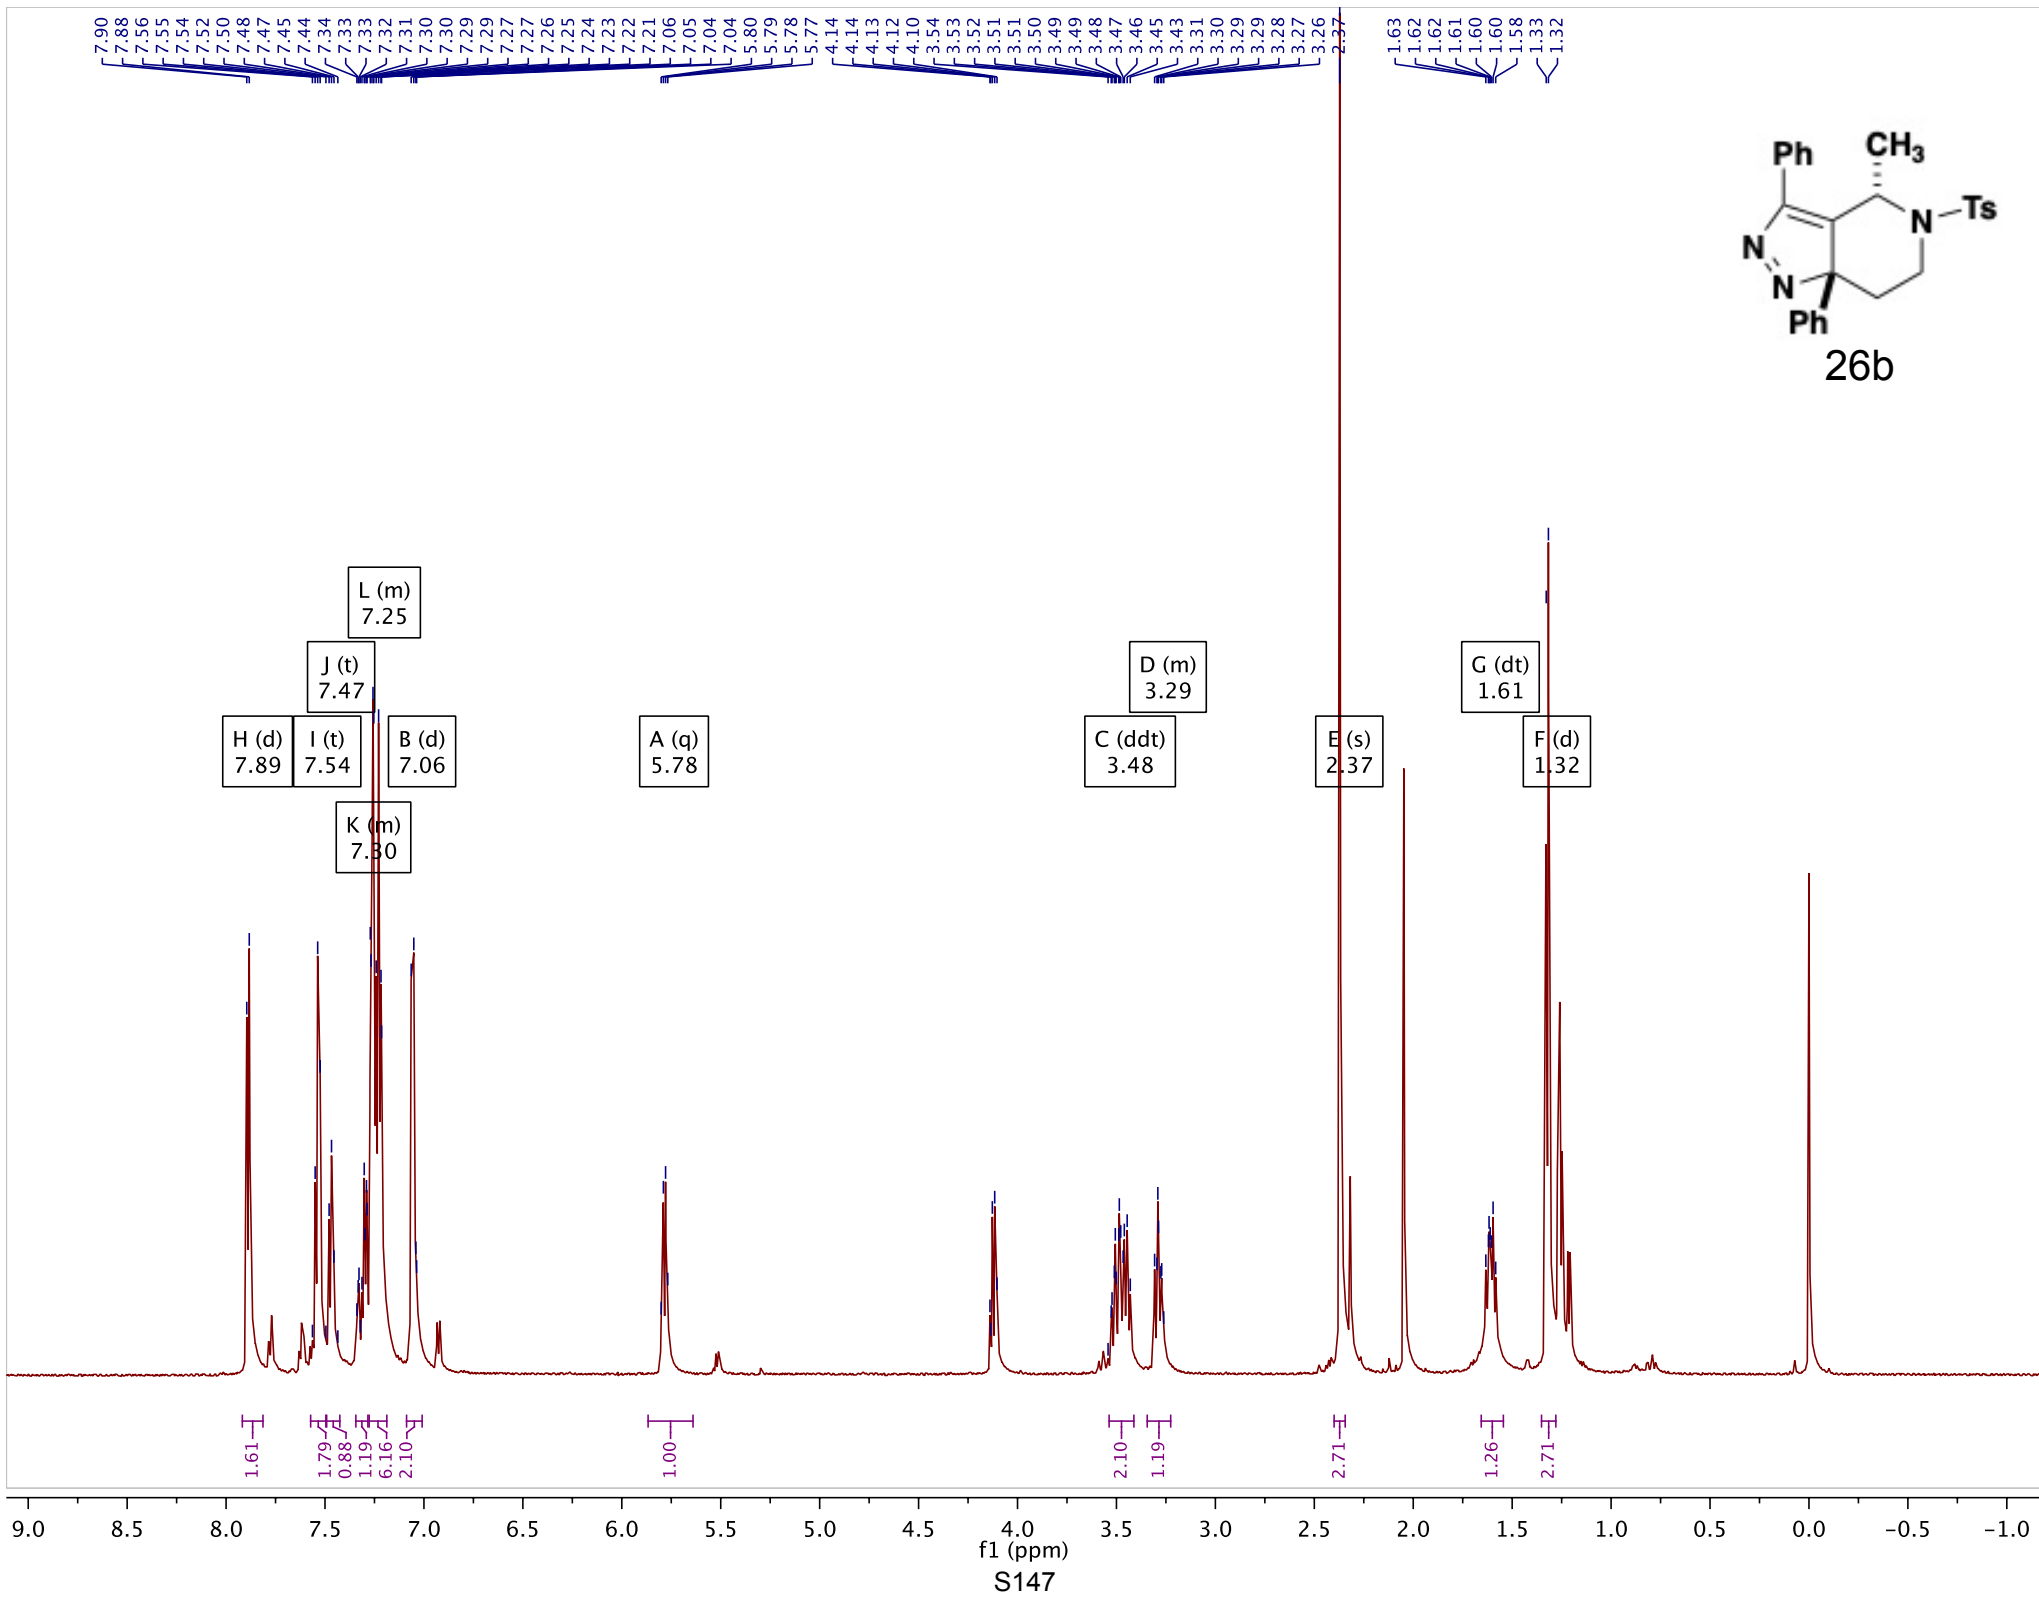

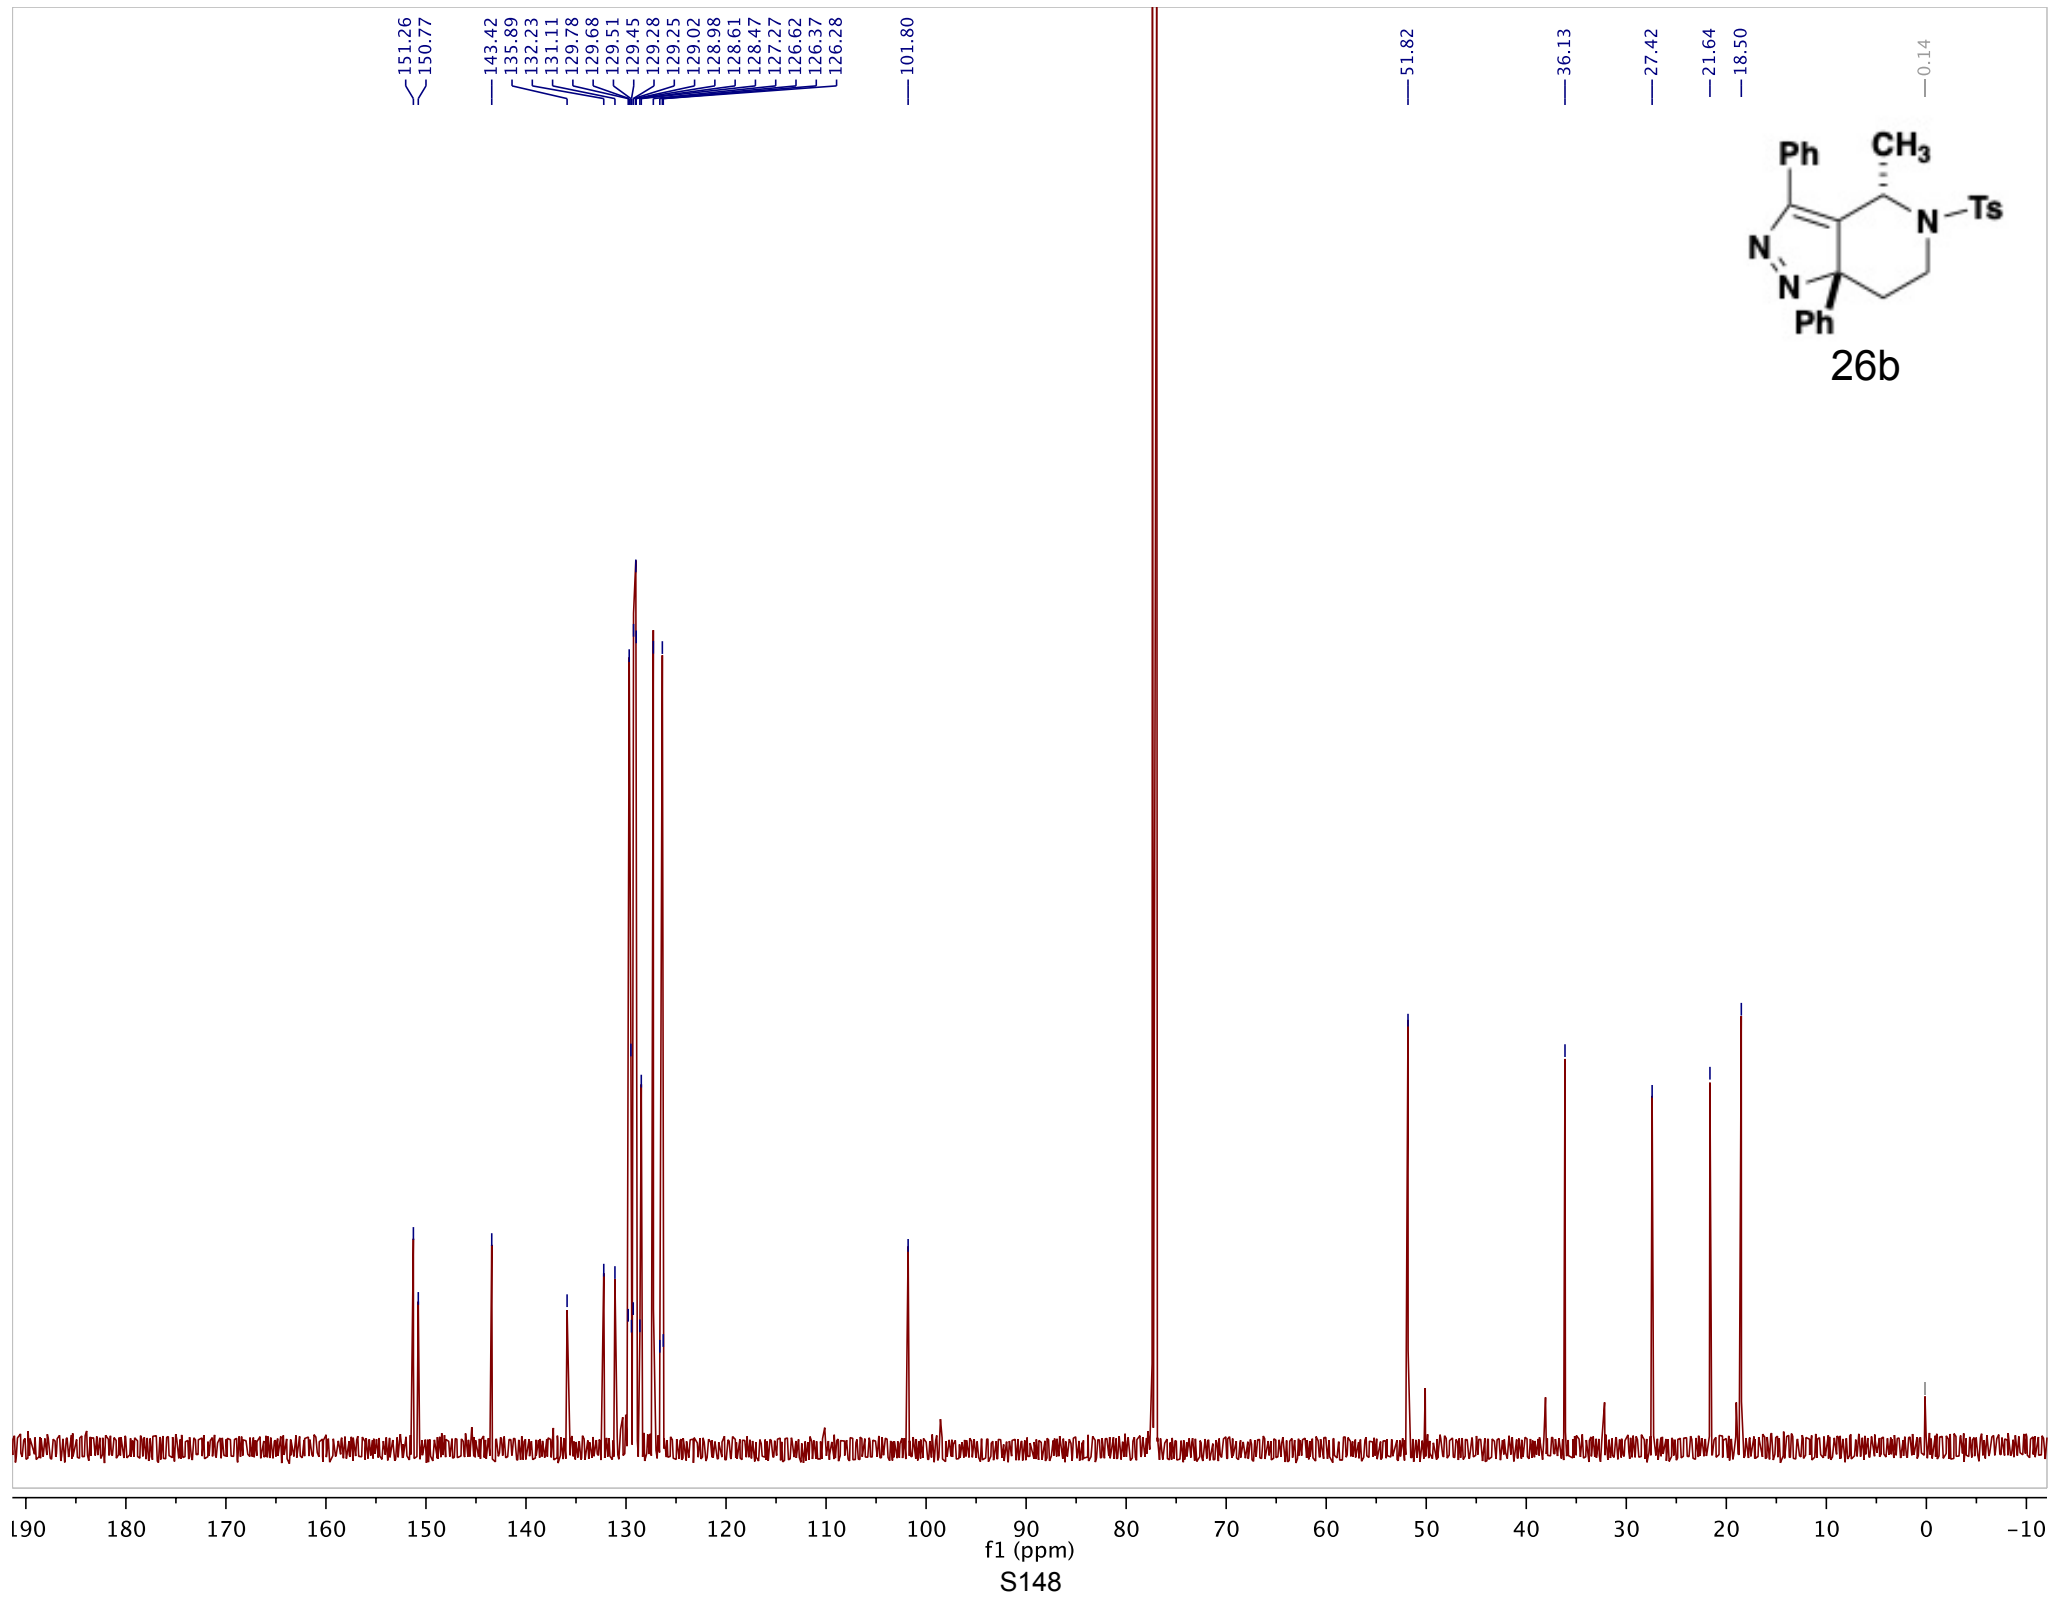

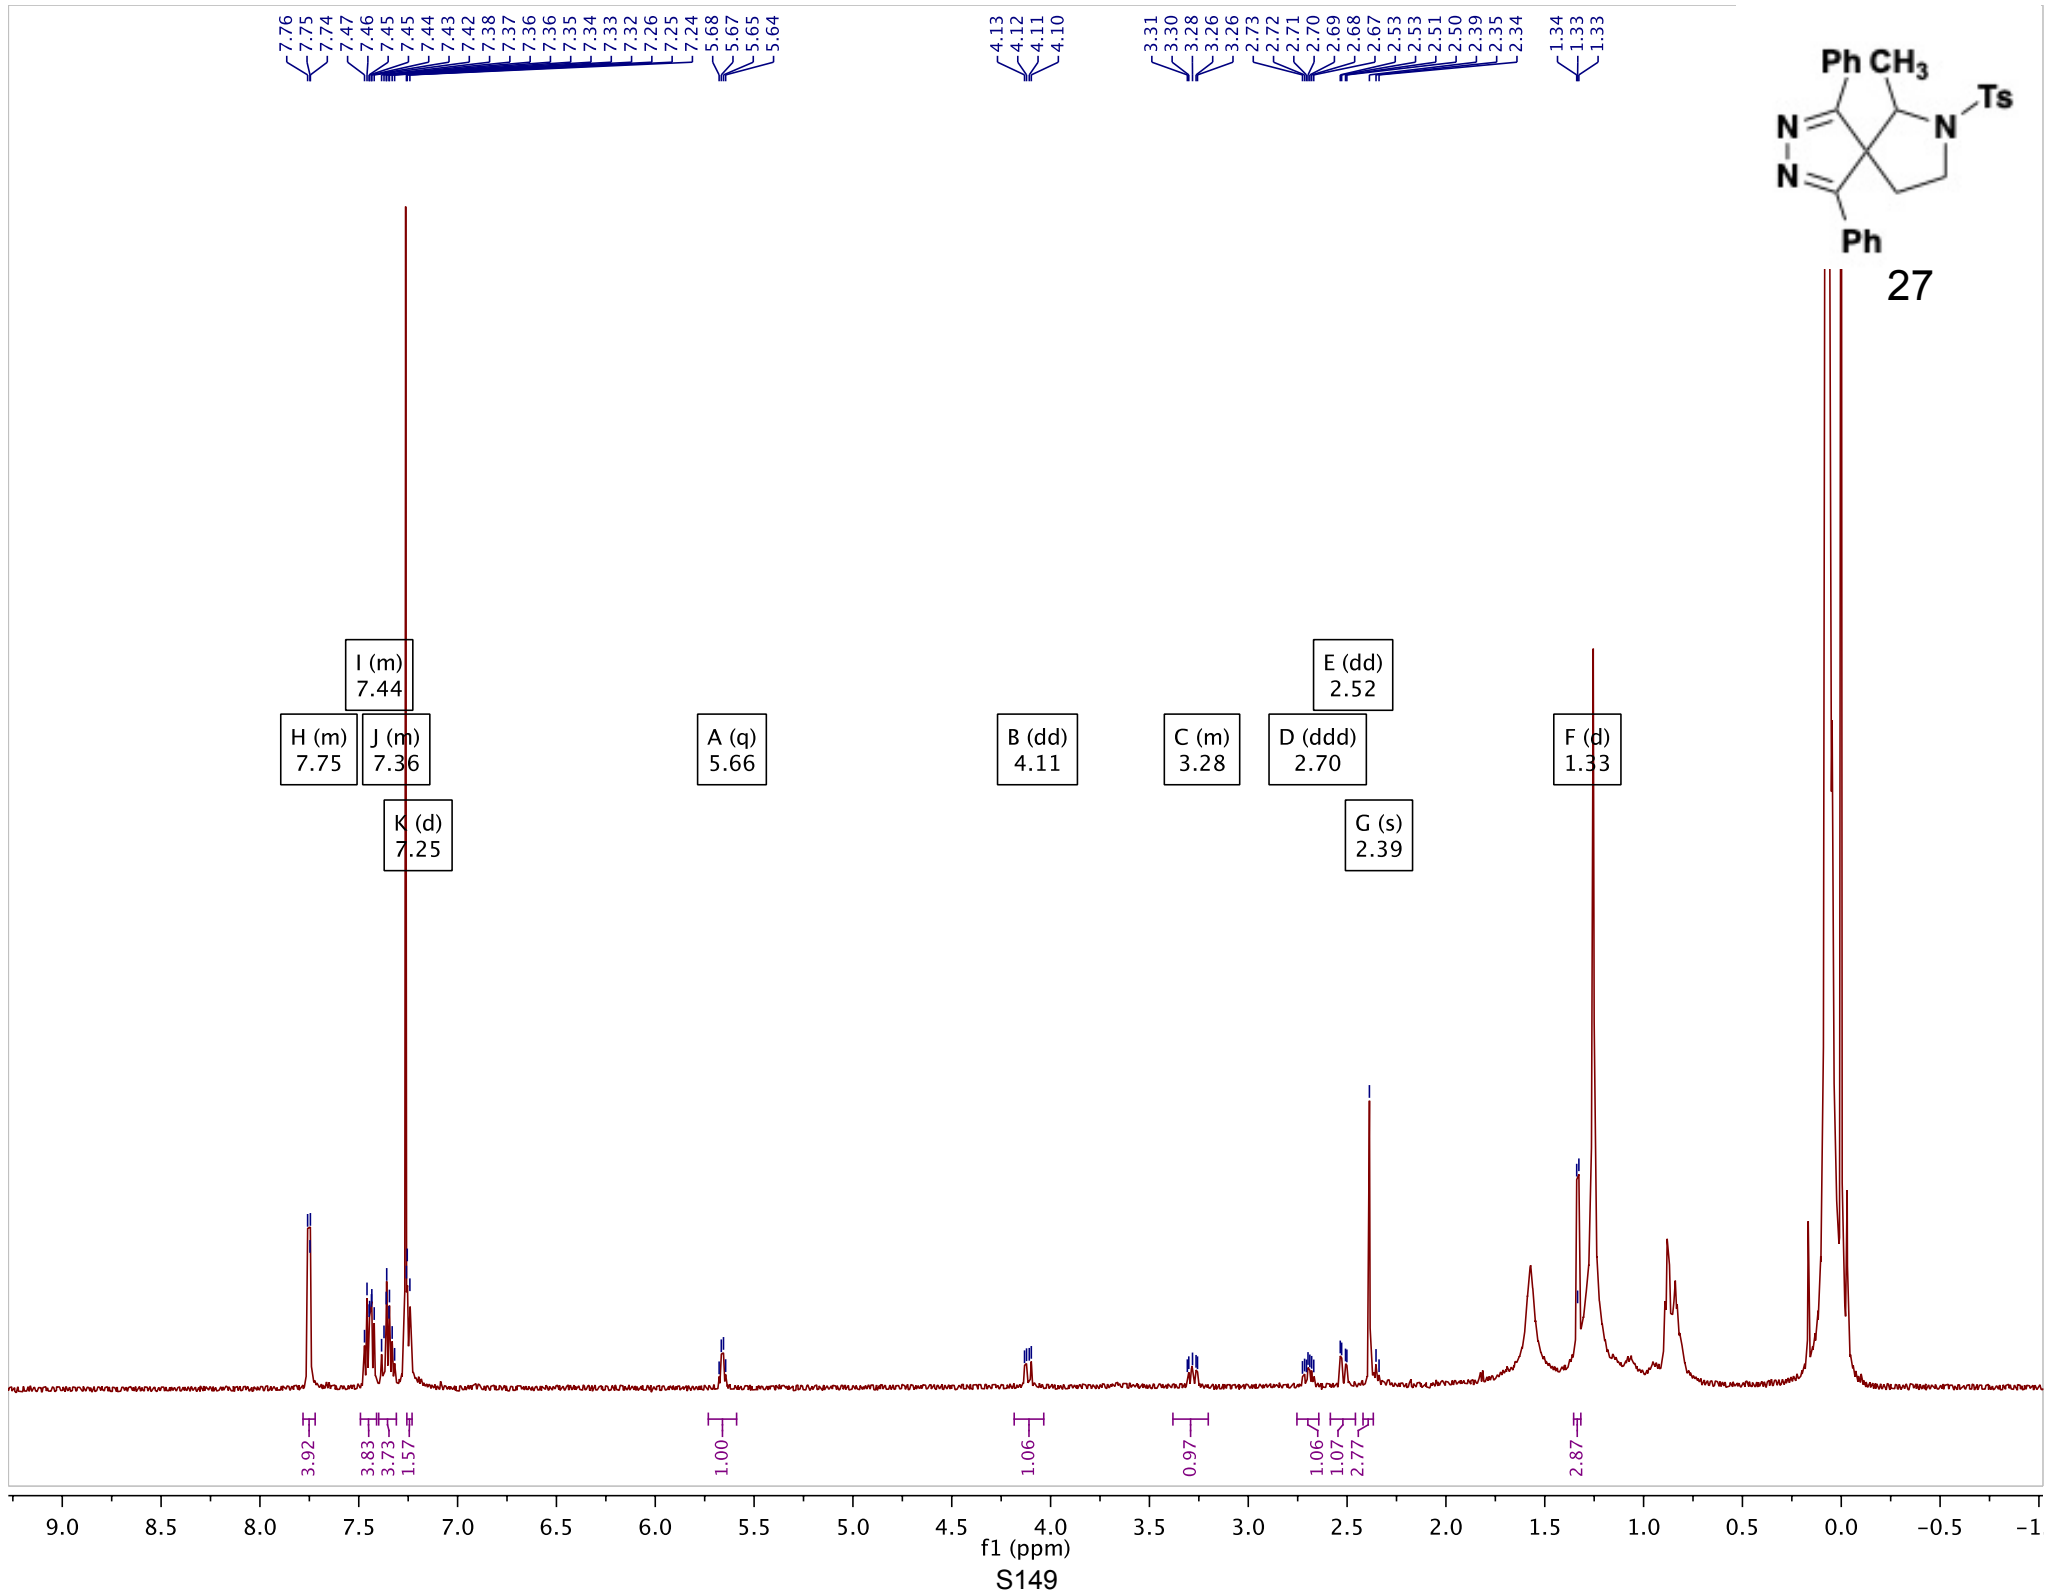

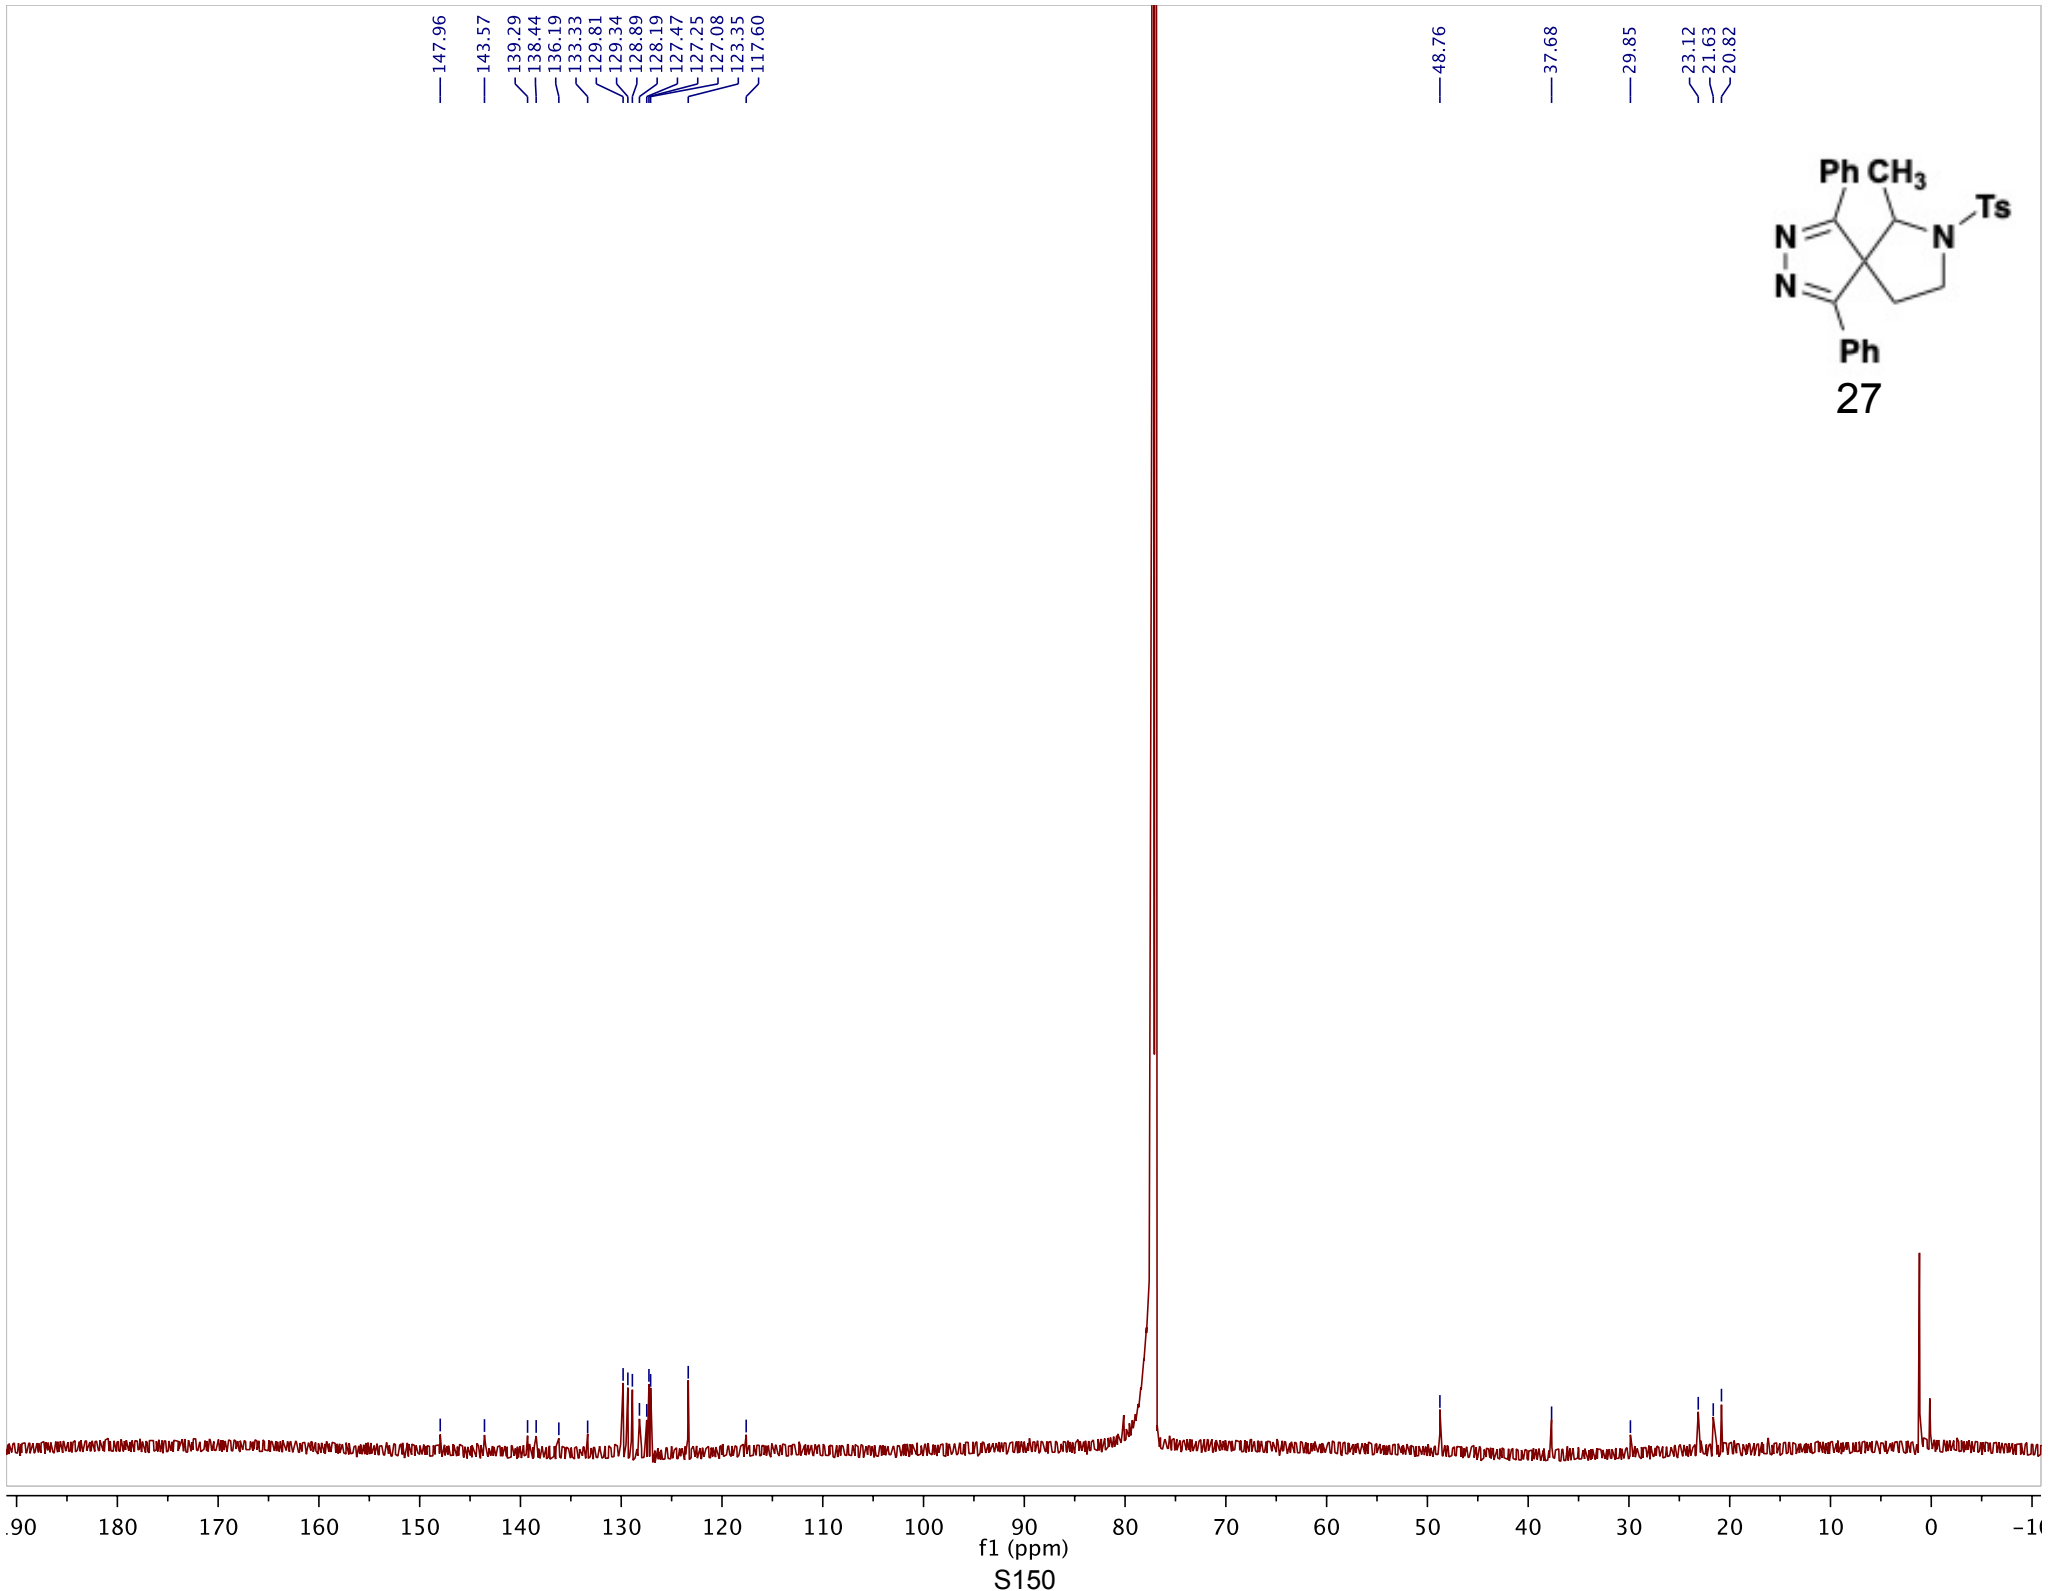

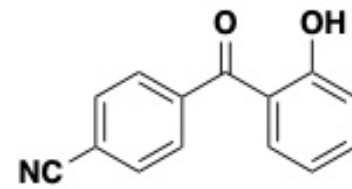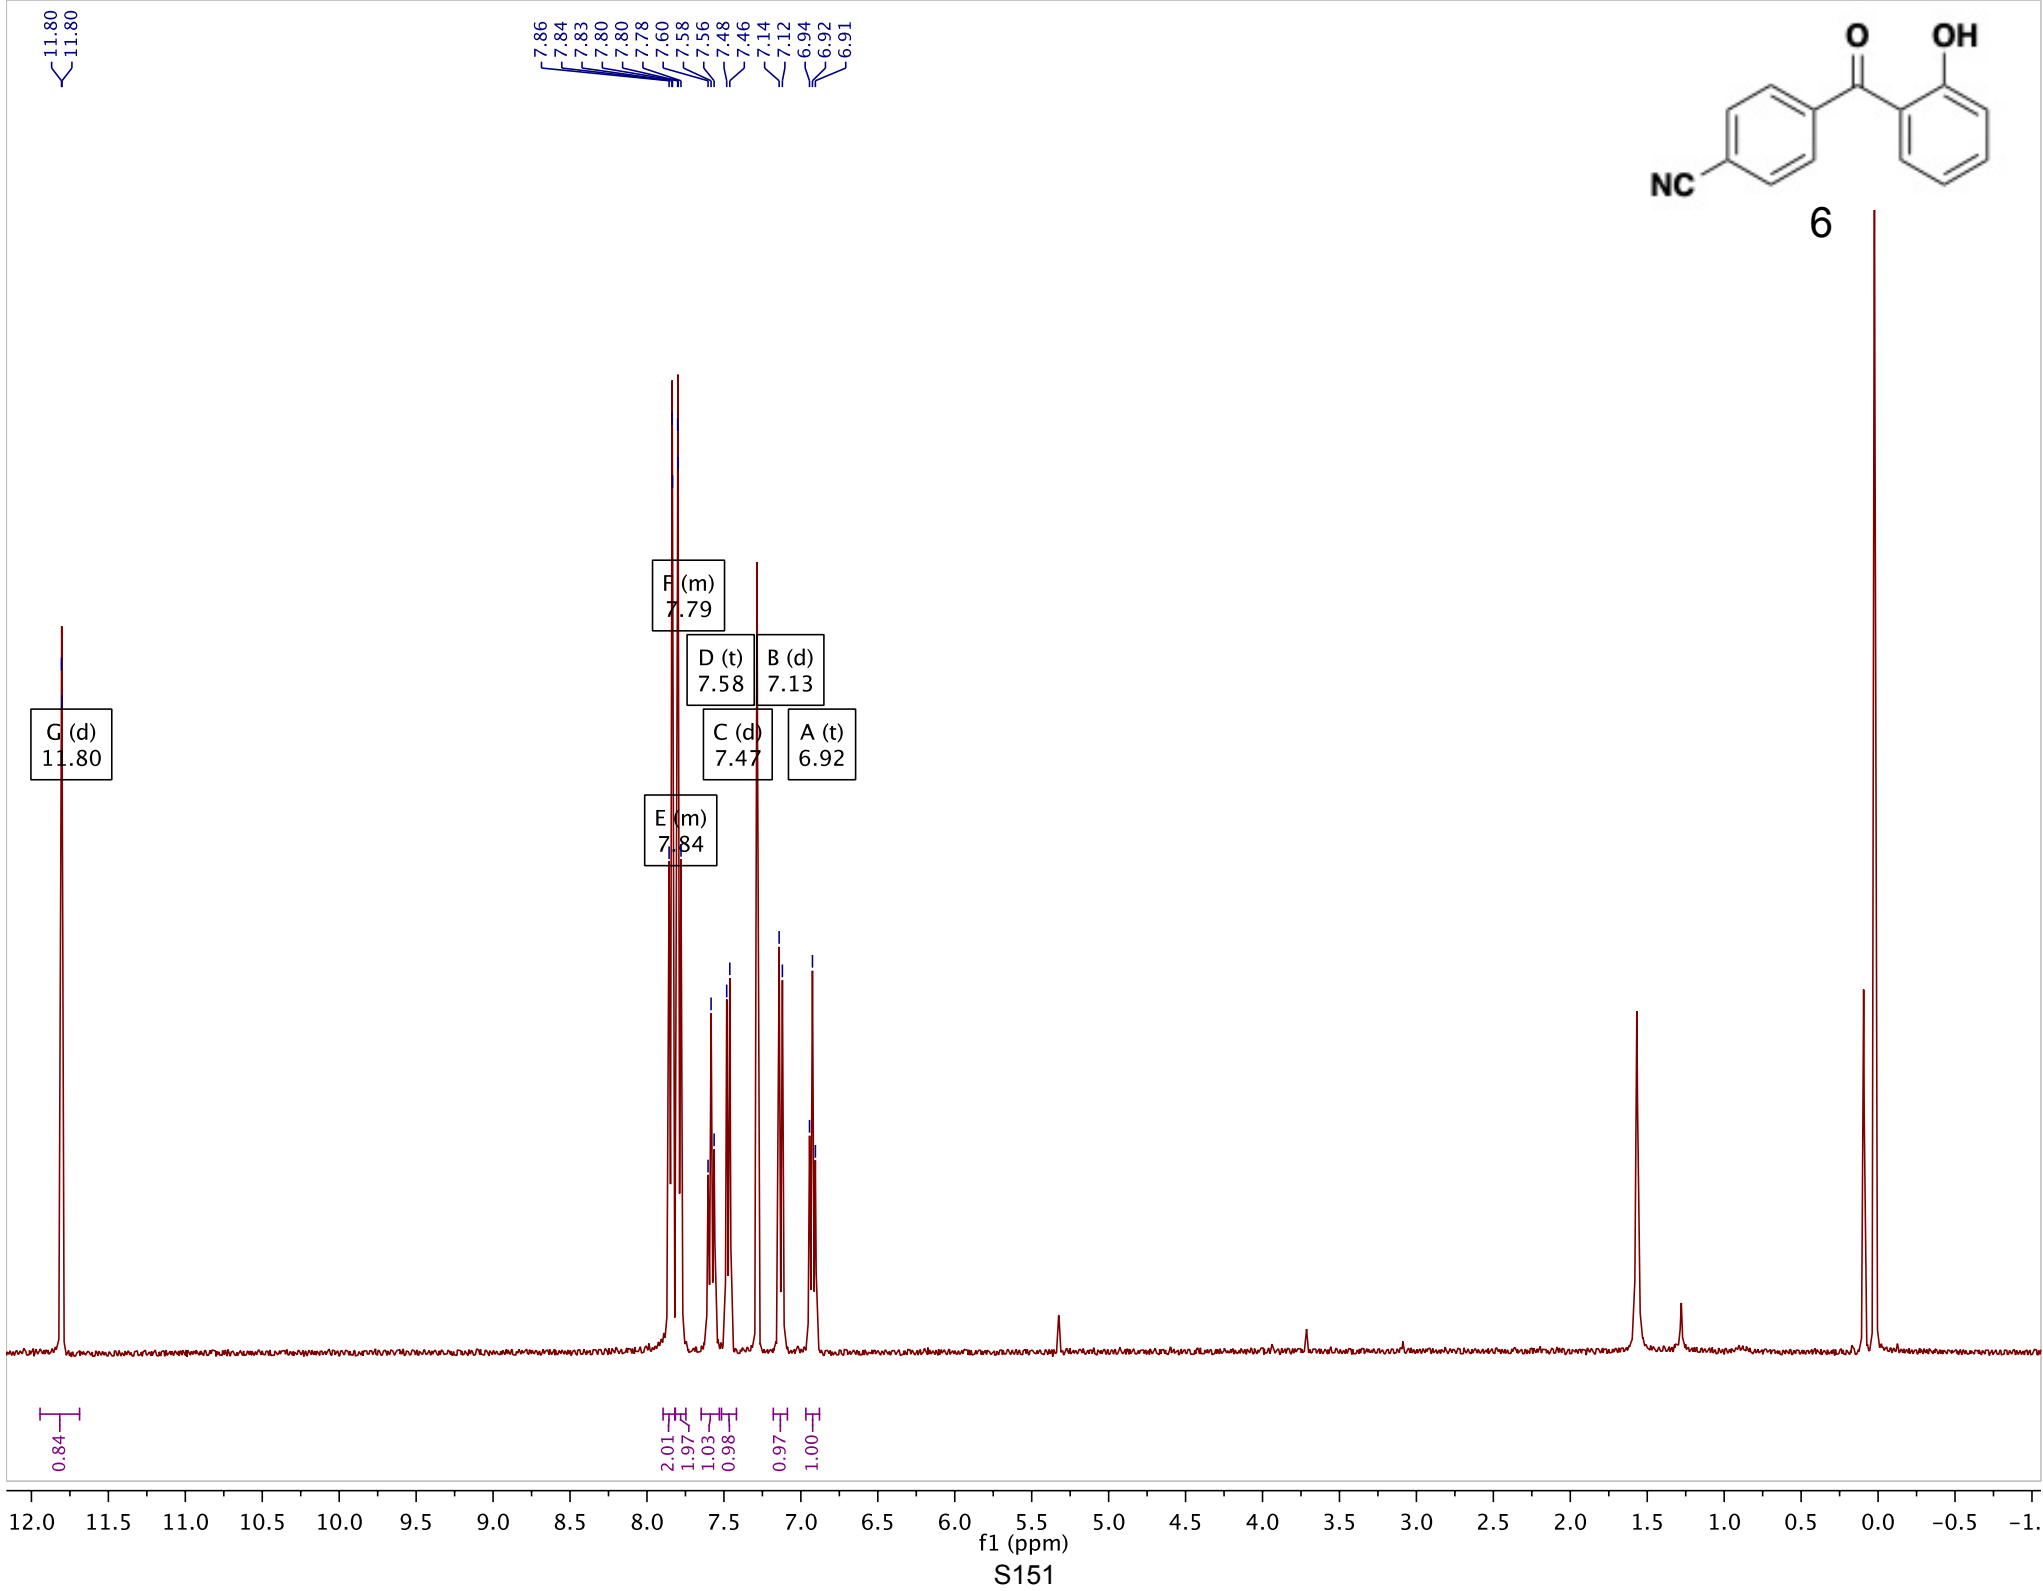

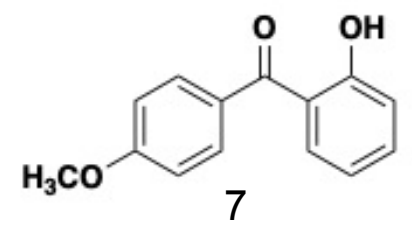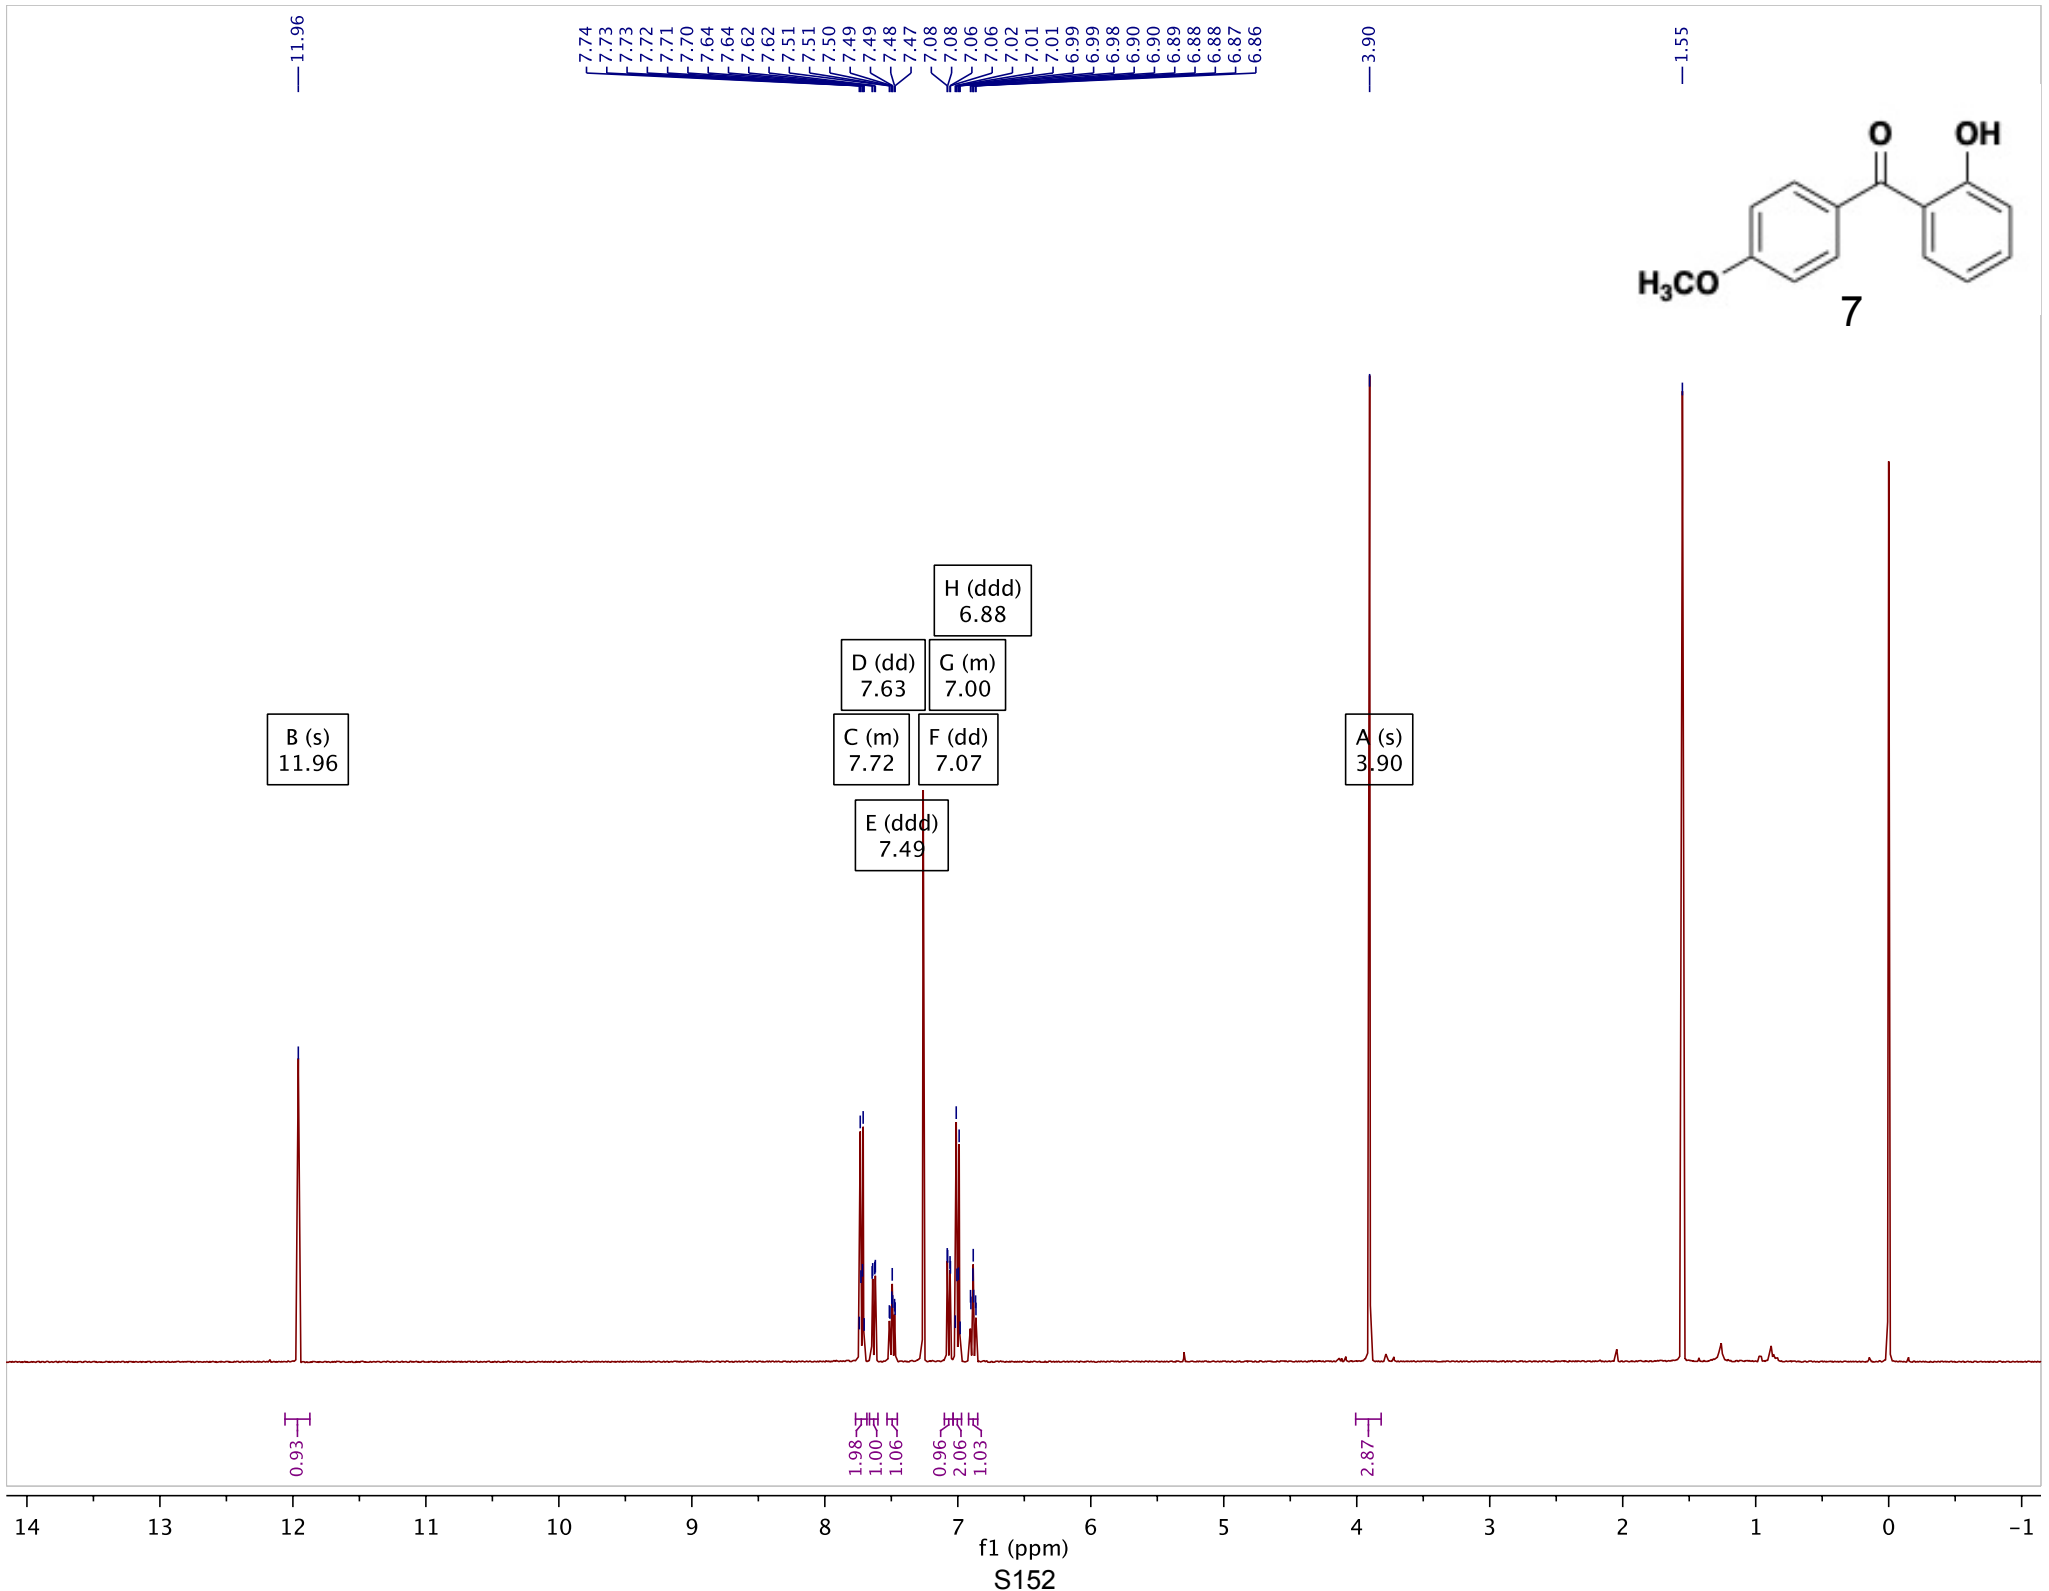



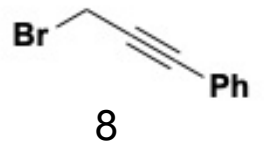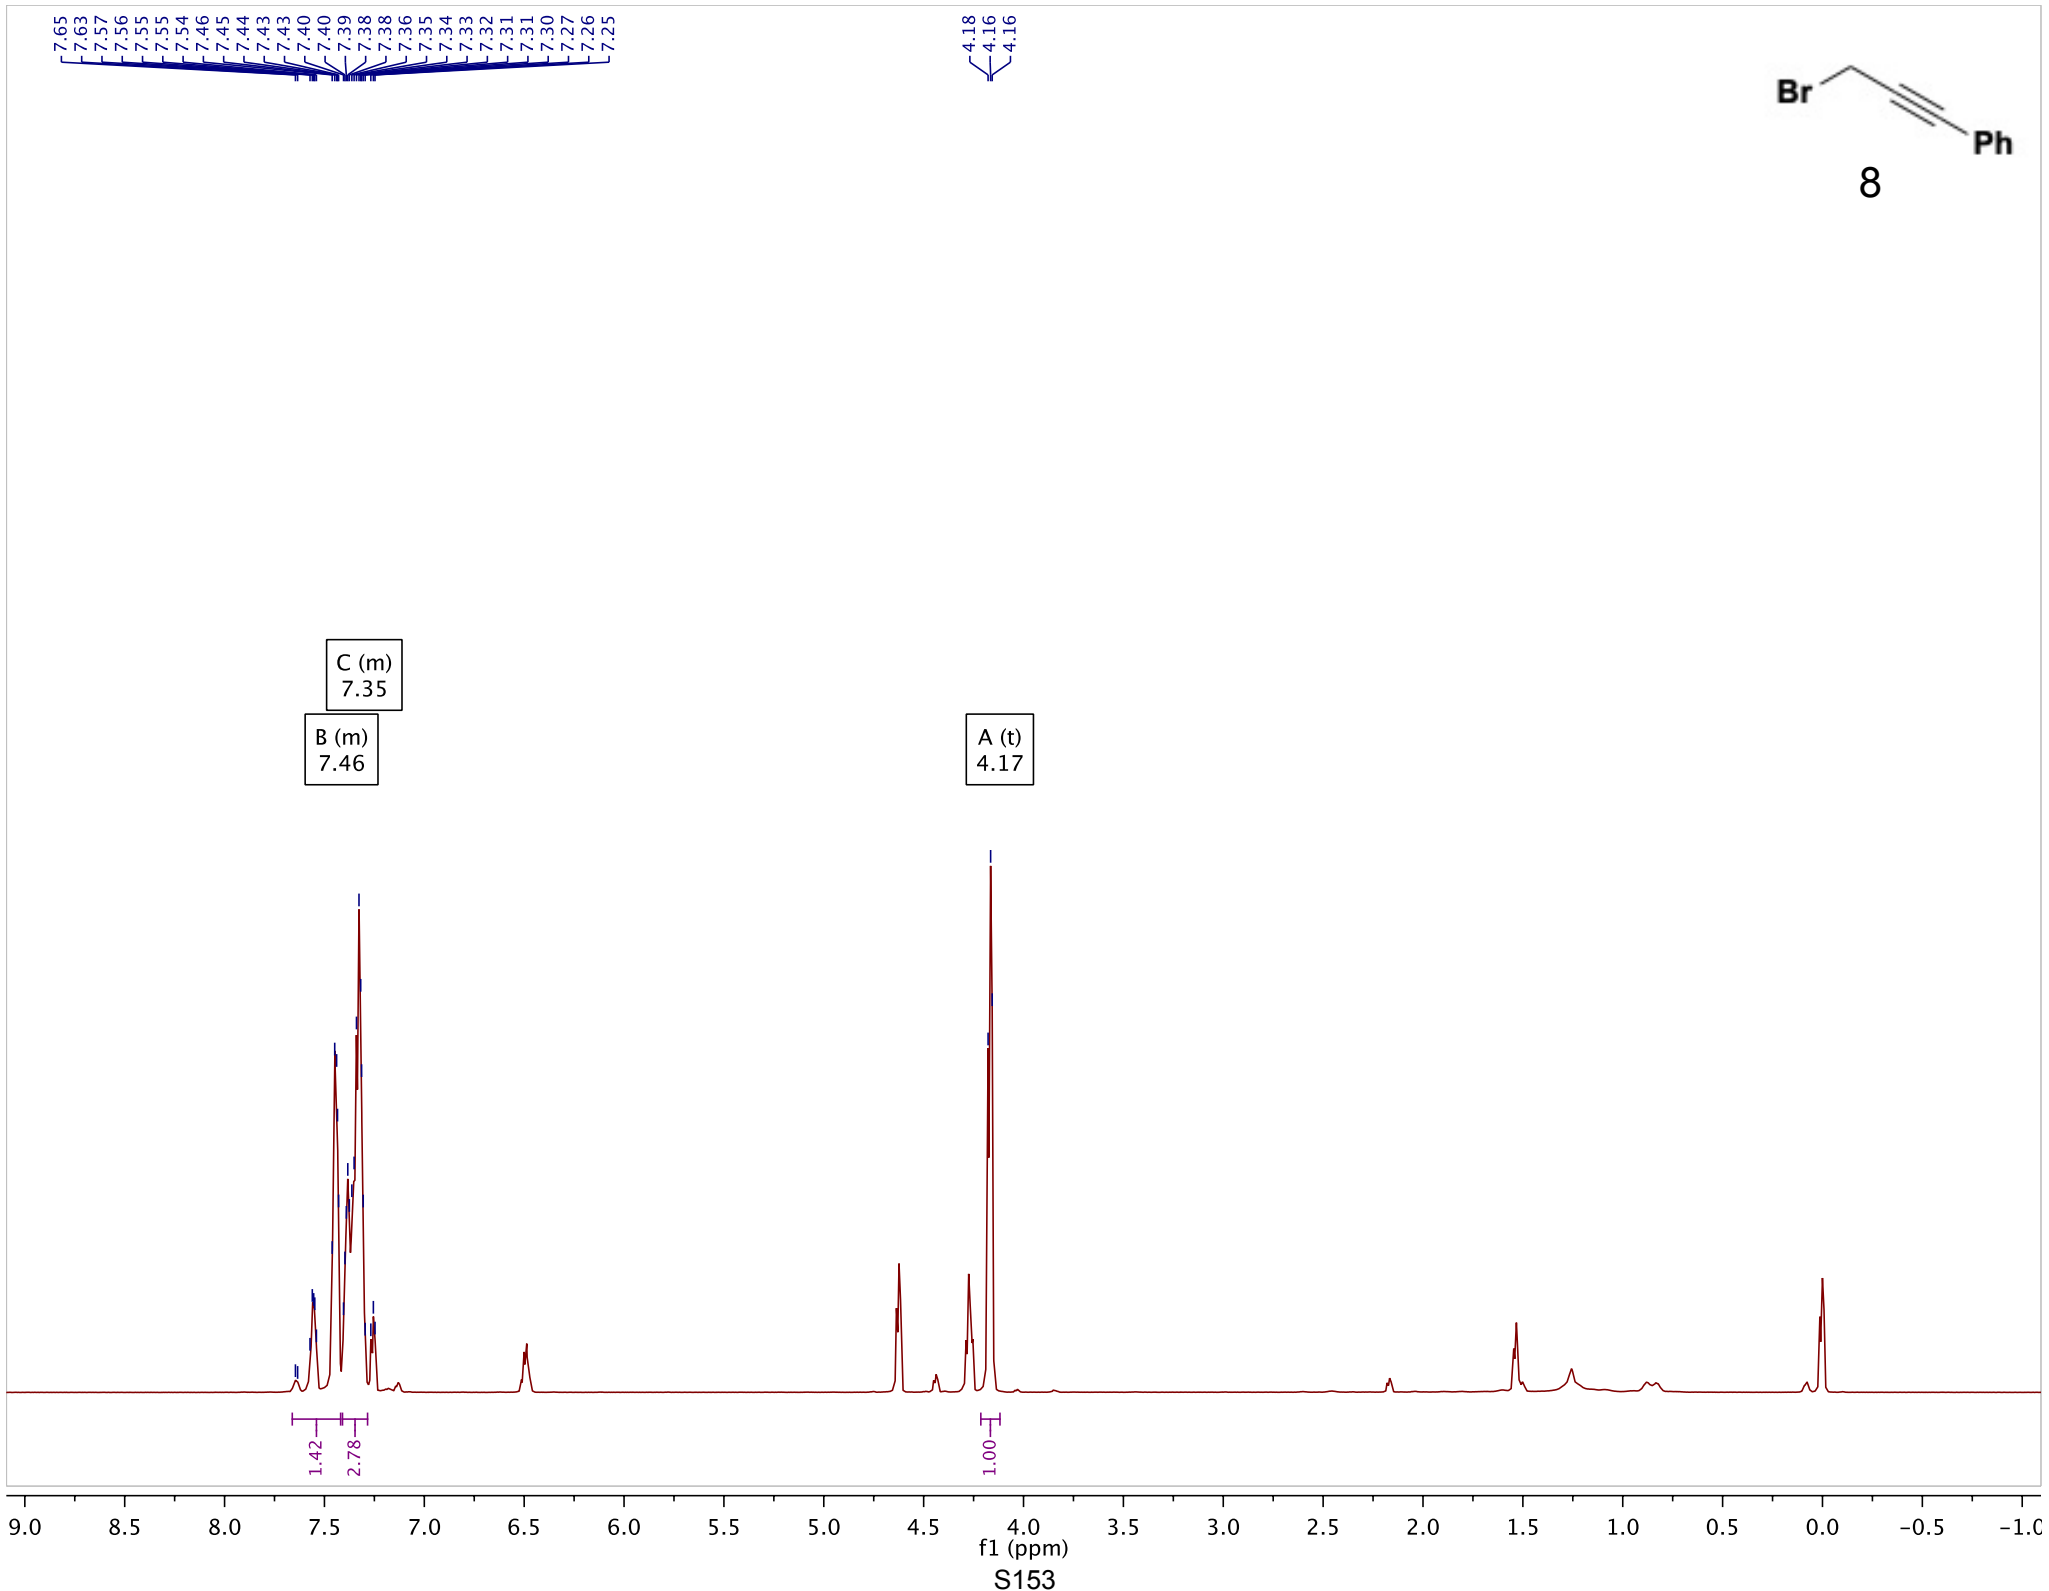

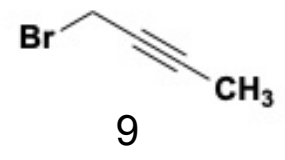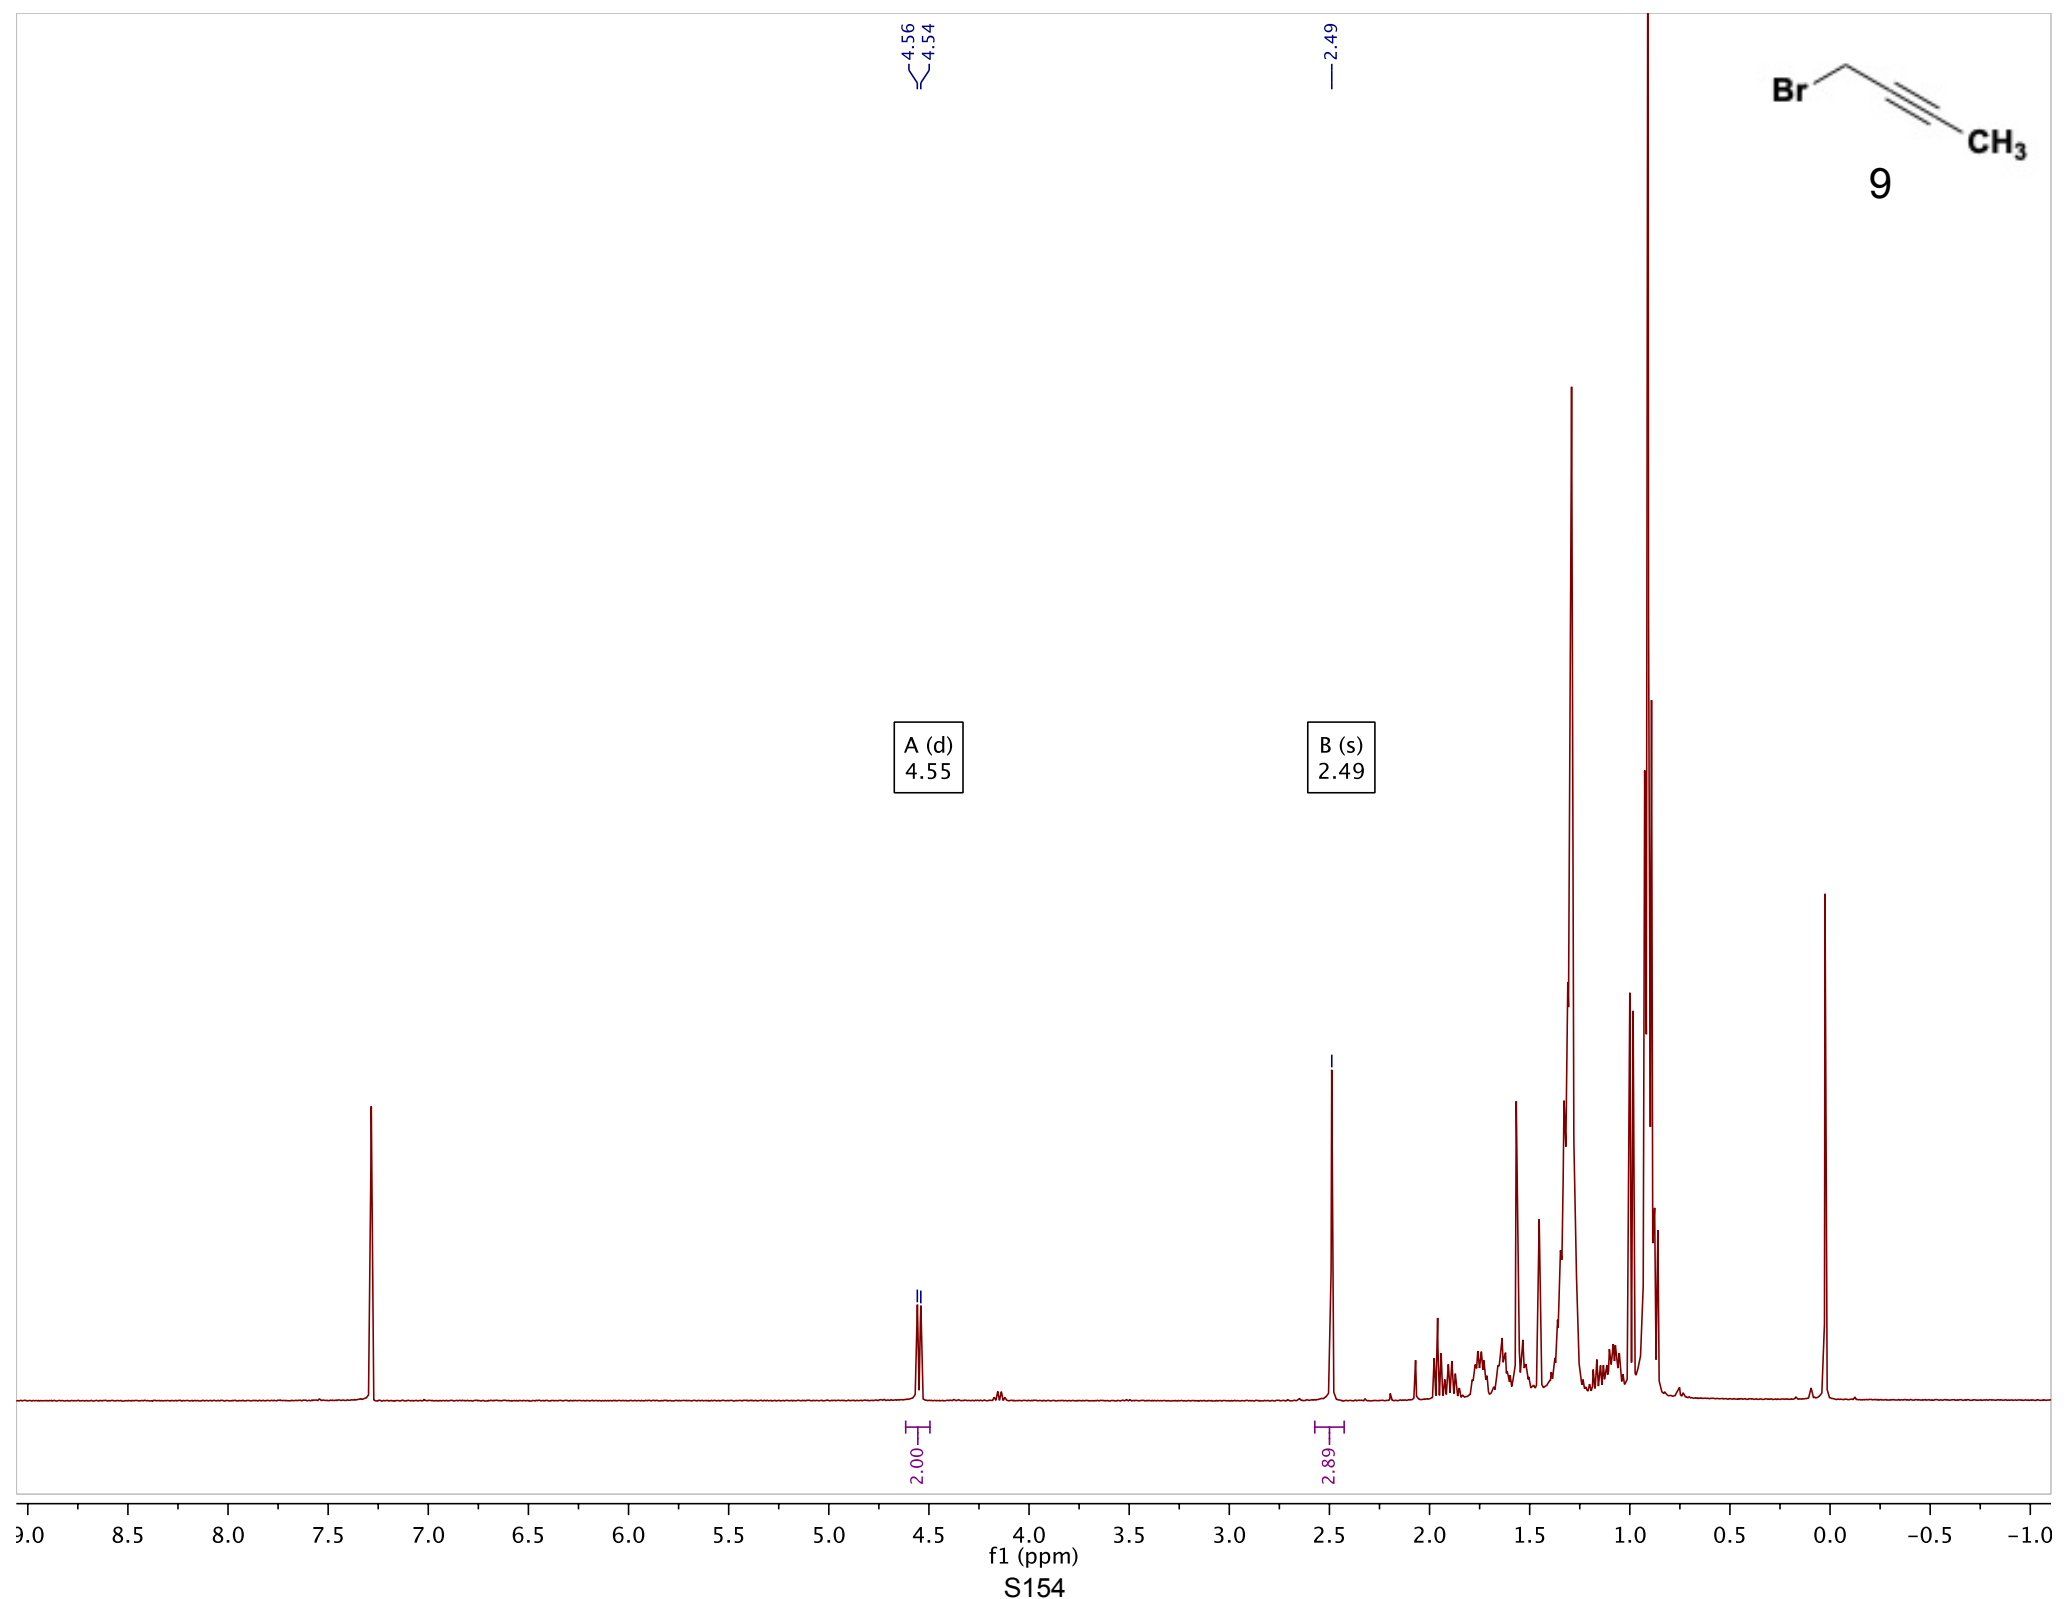

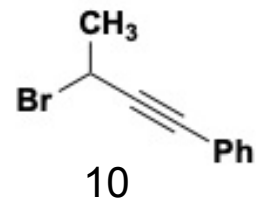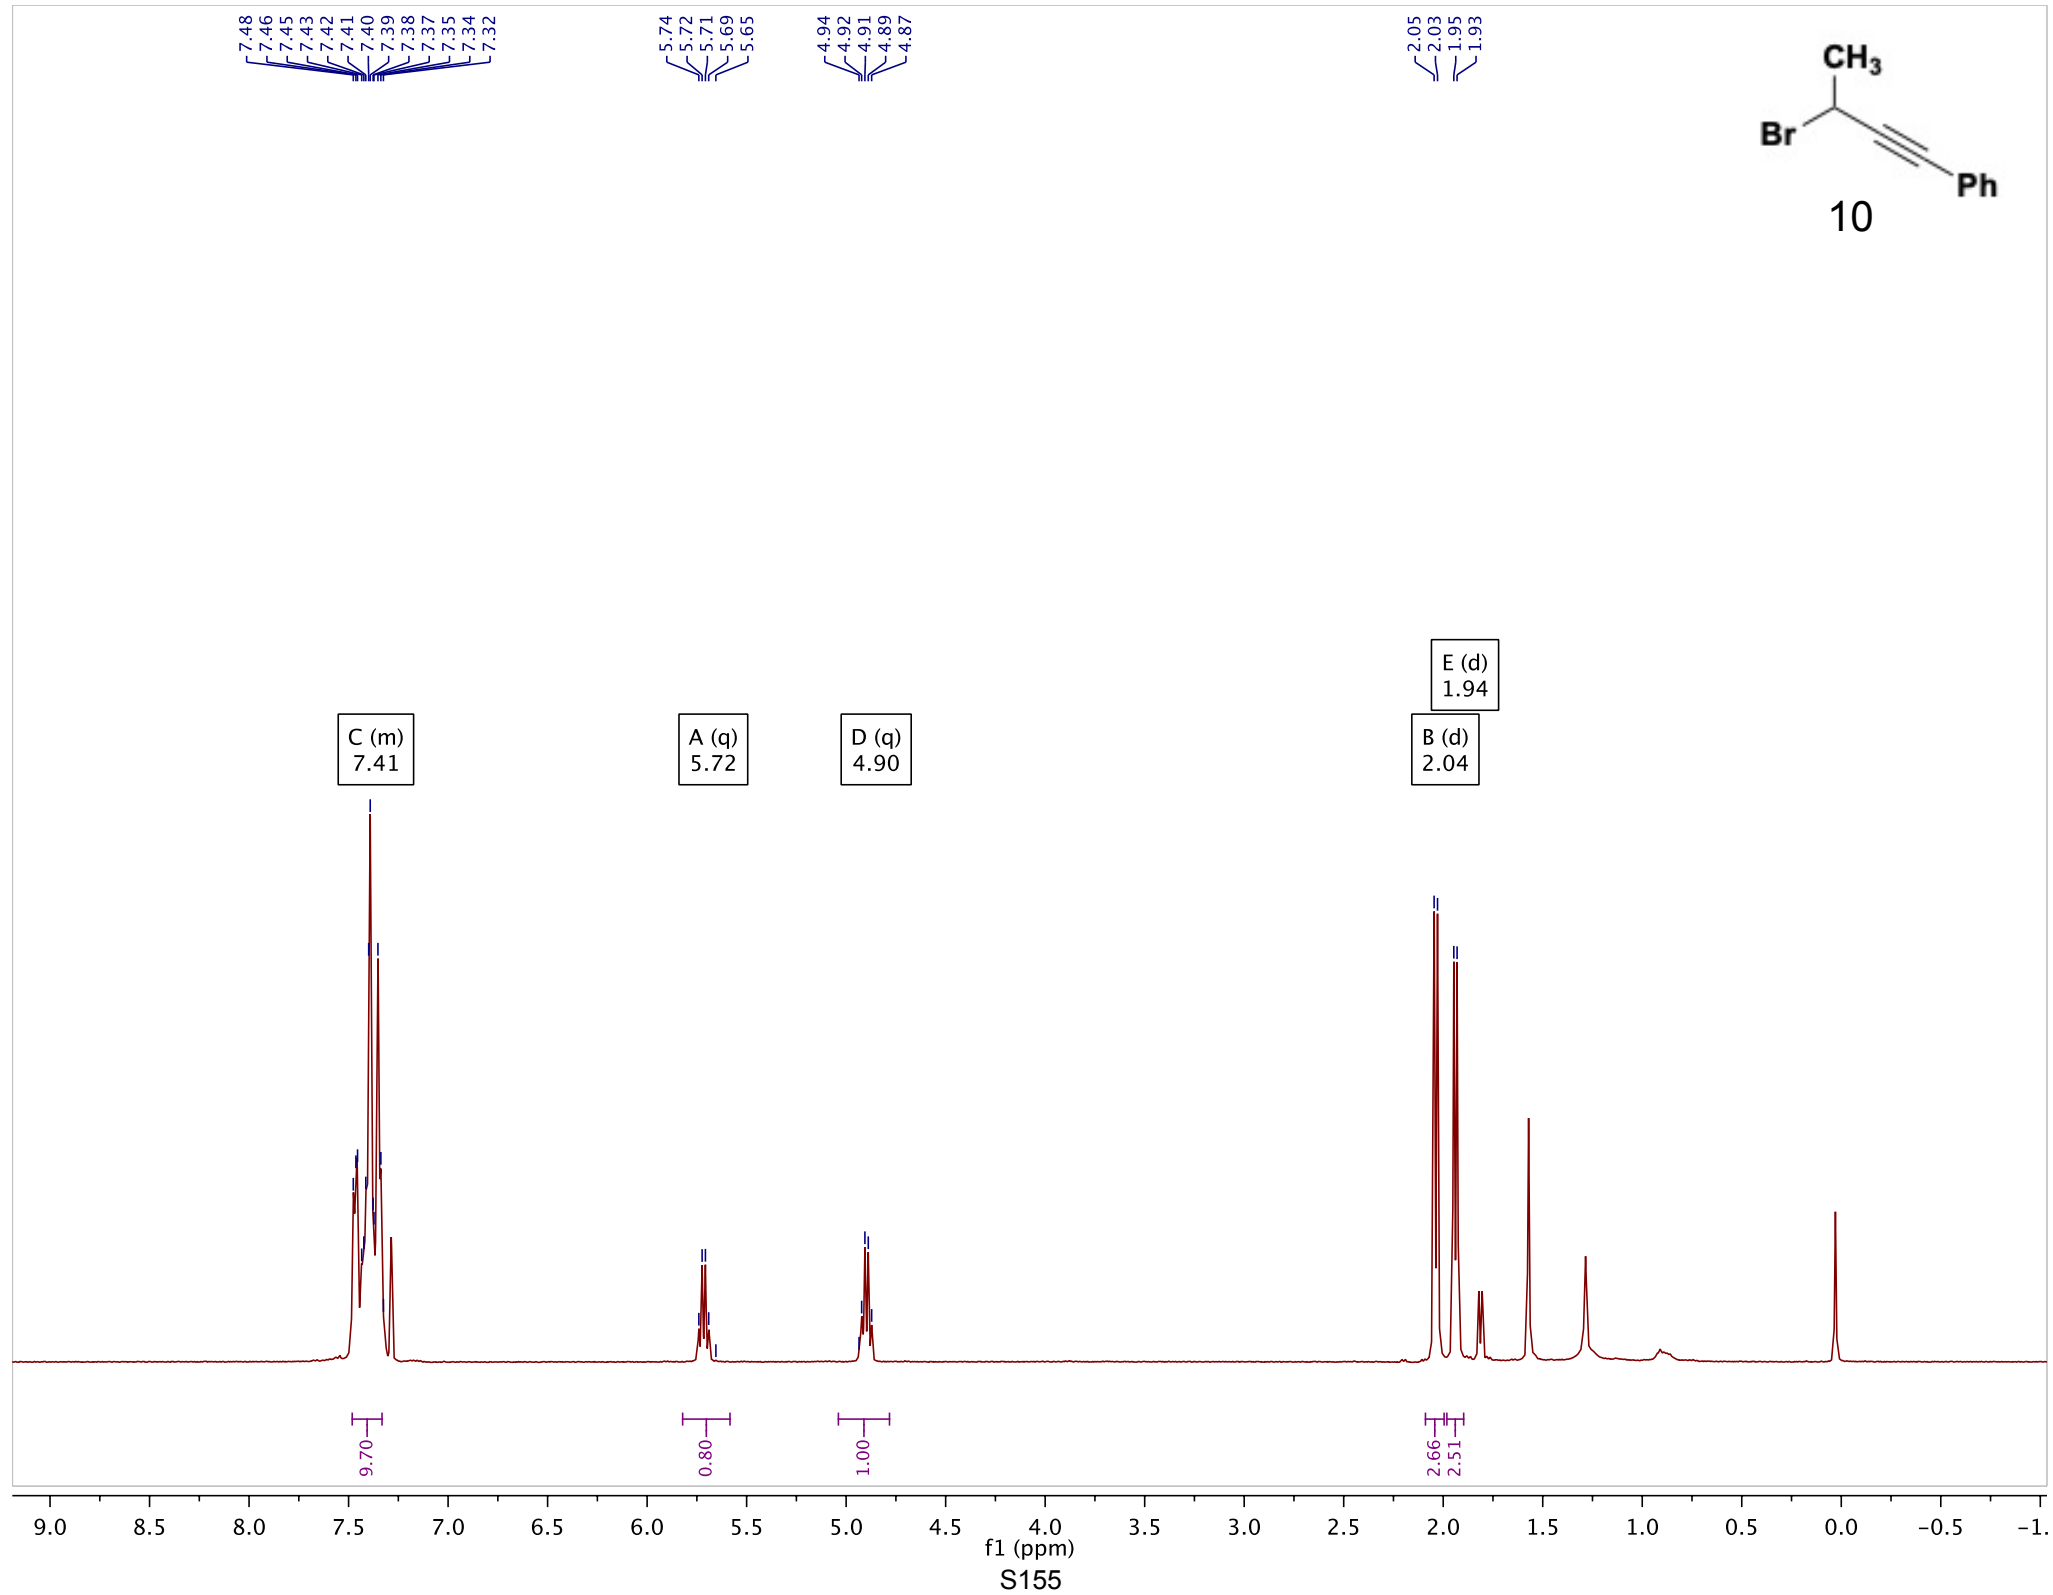

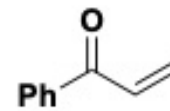

11

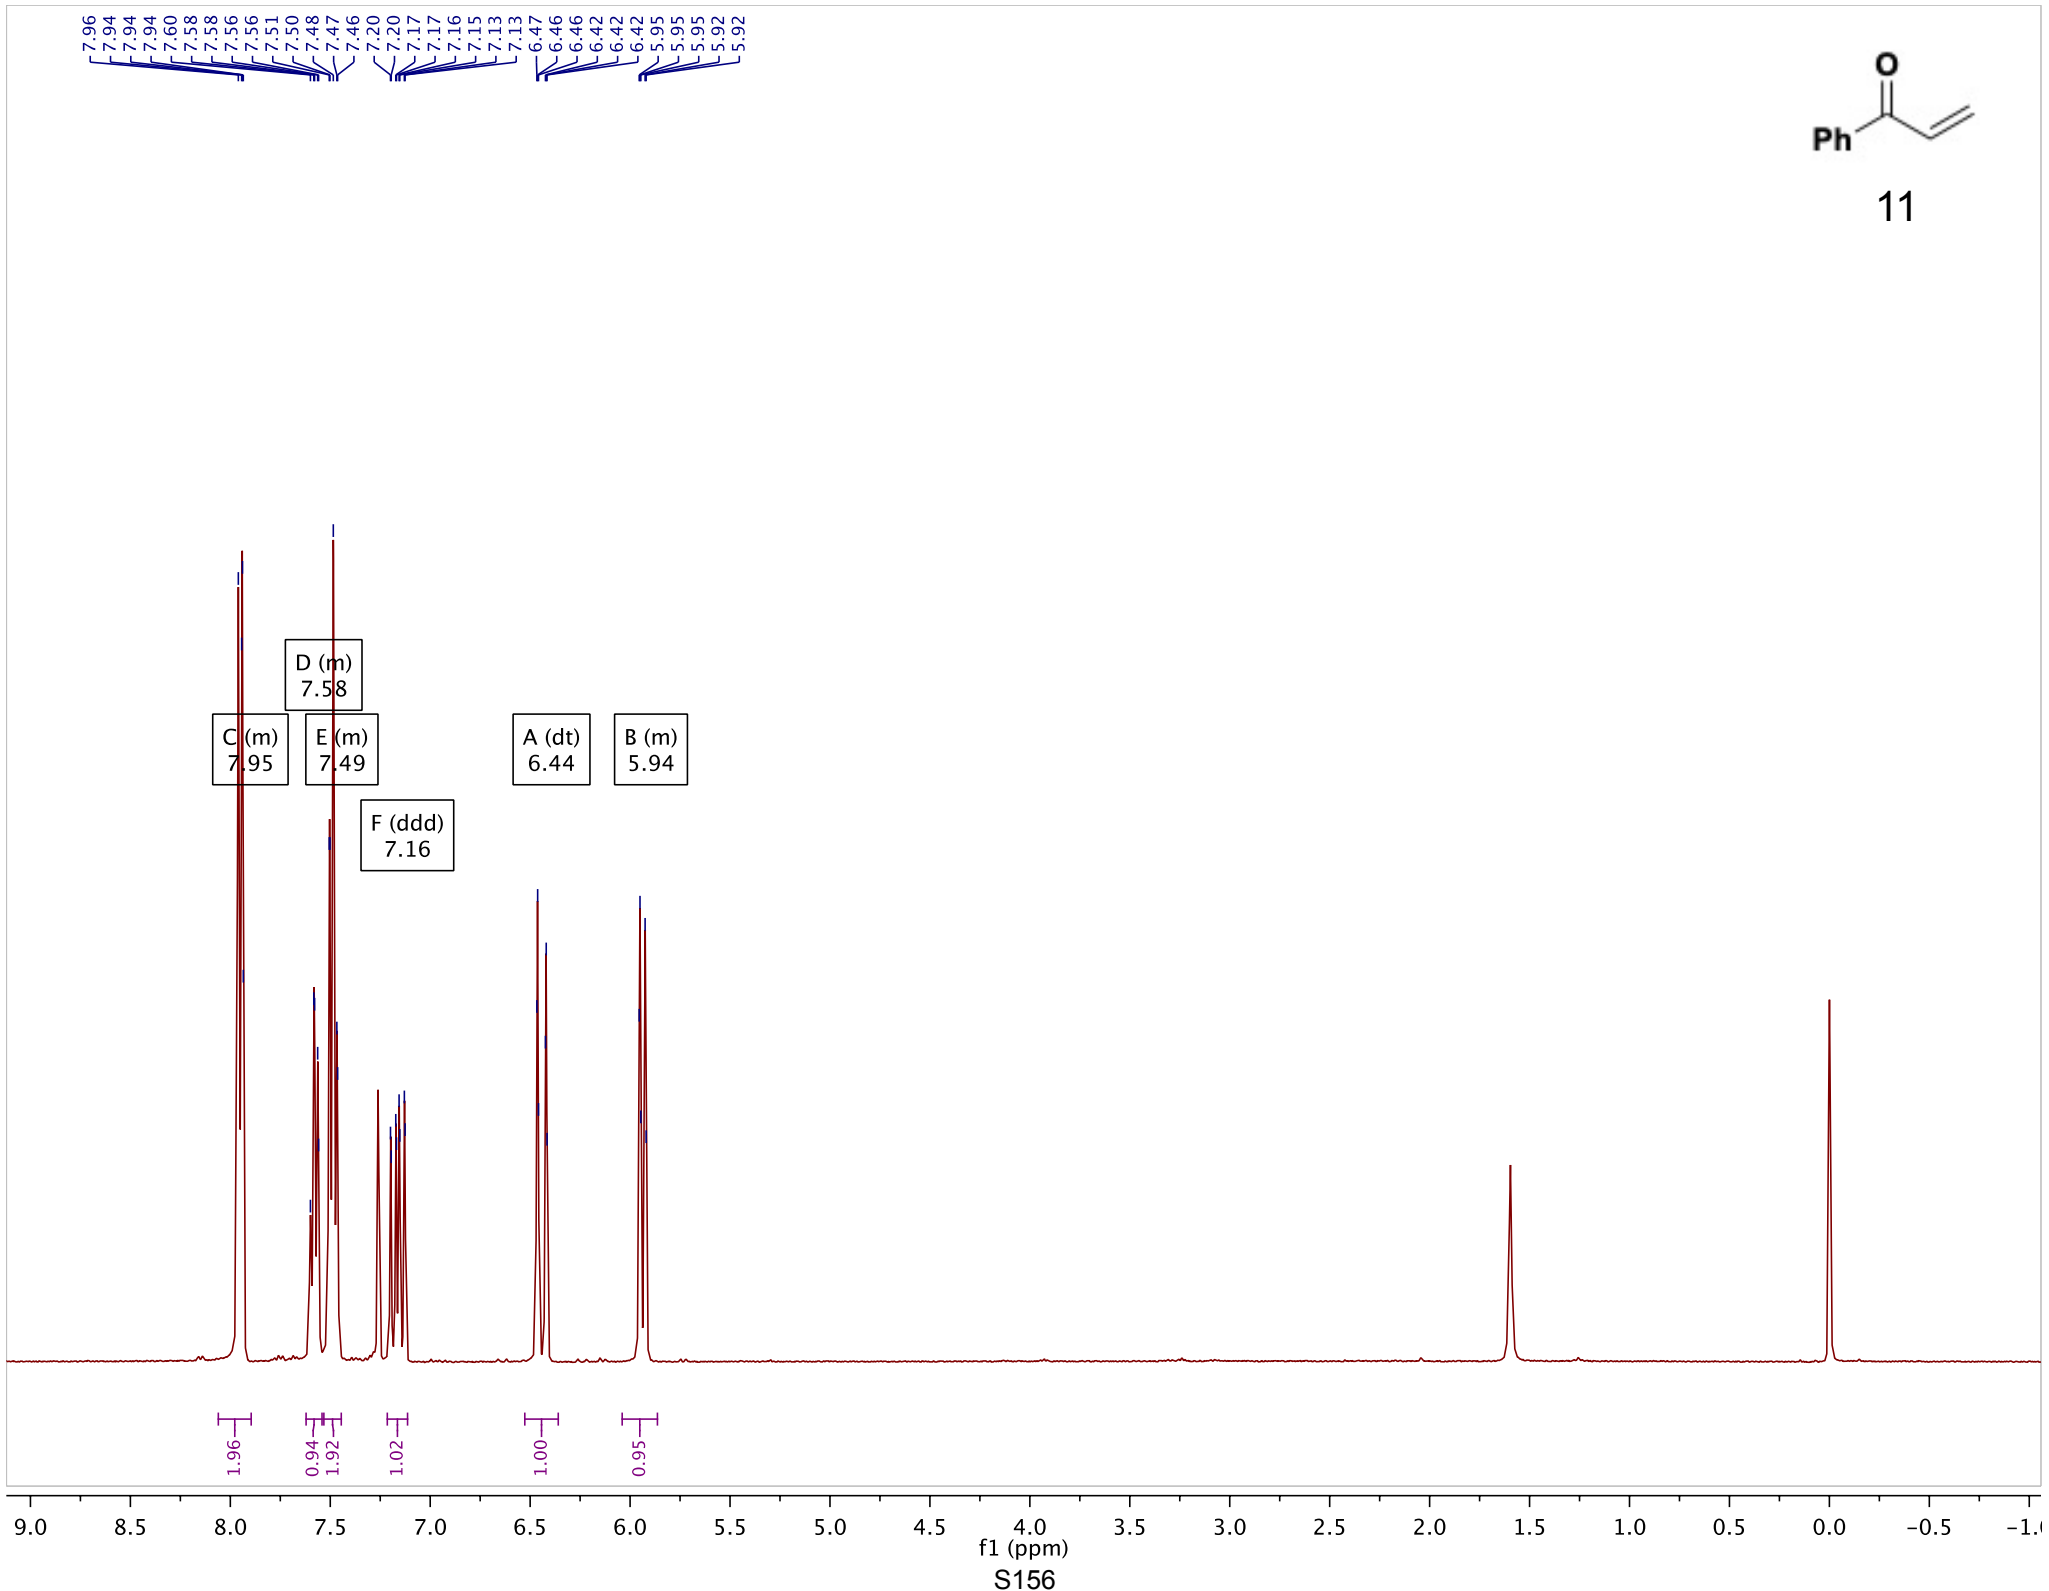

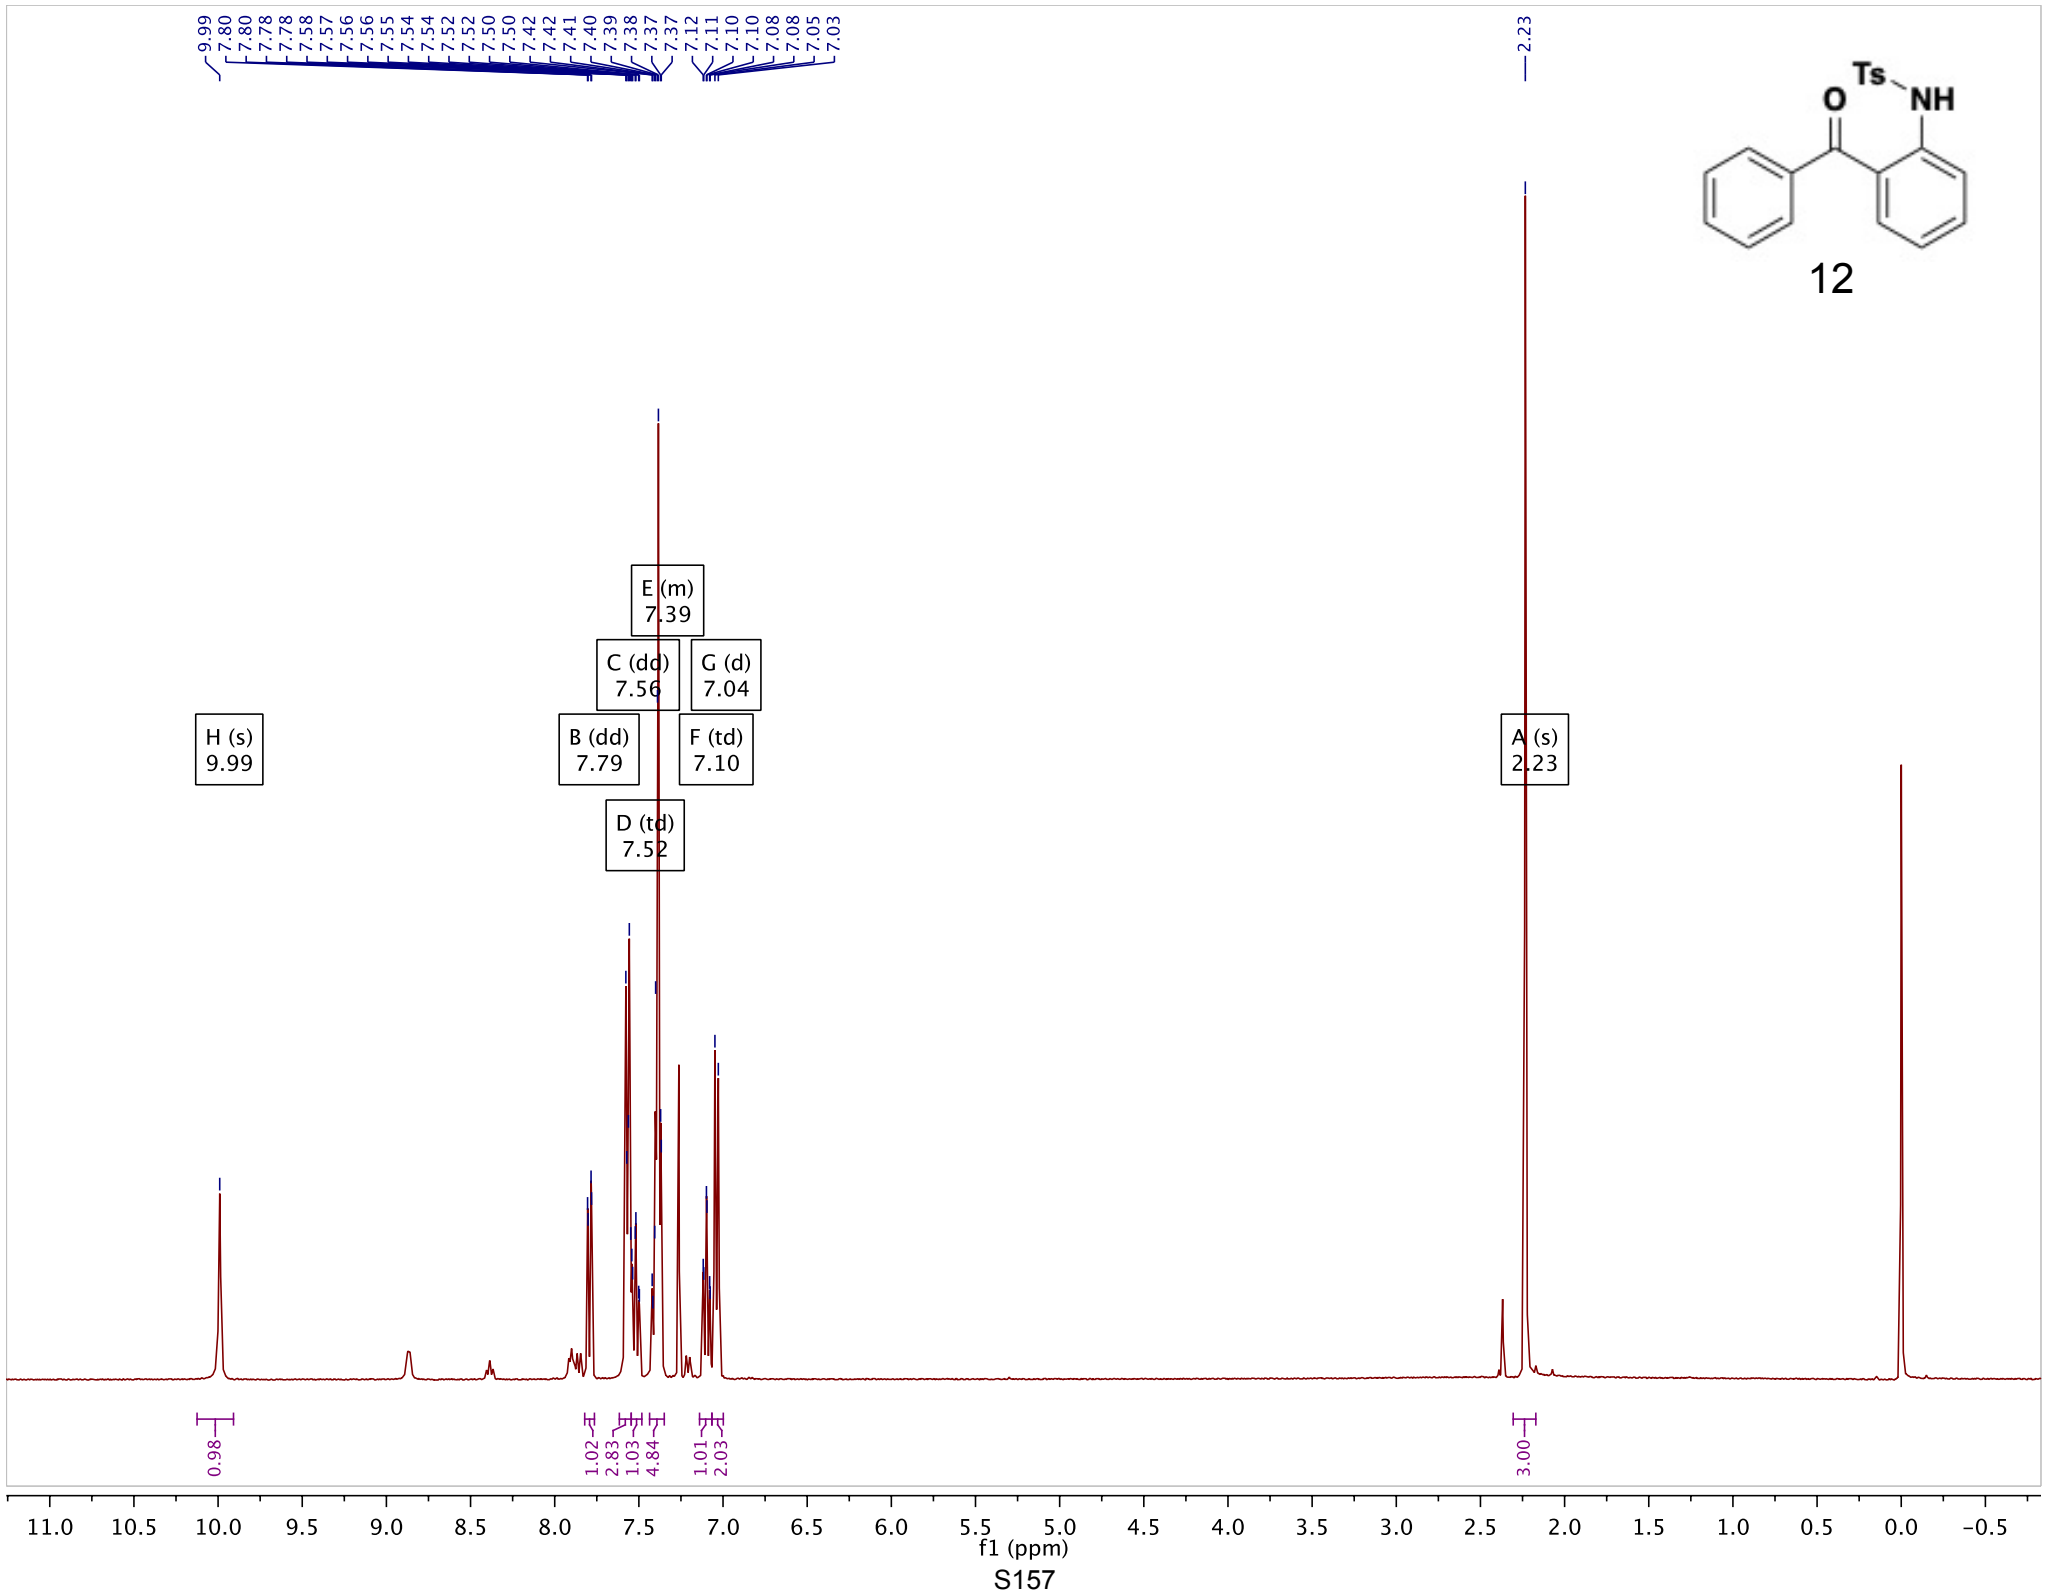

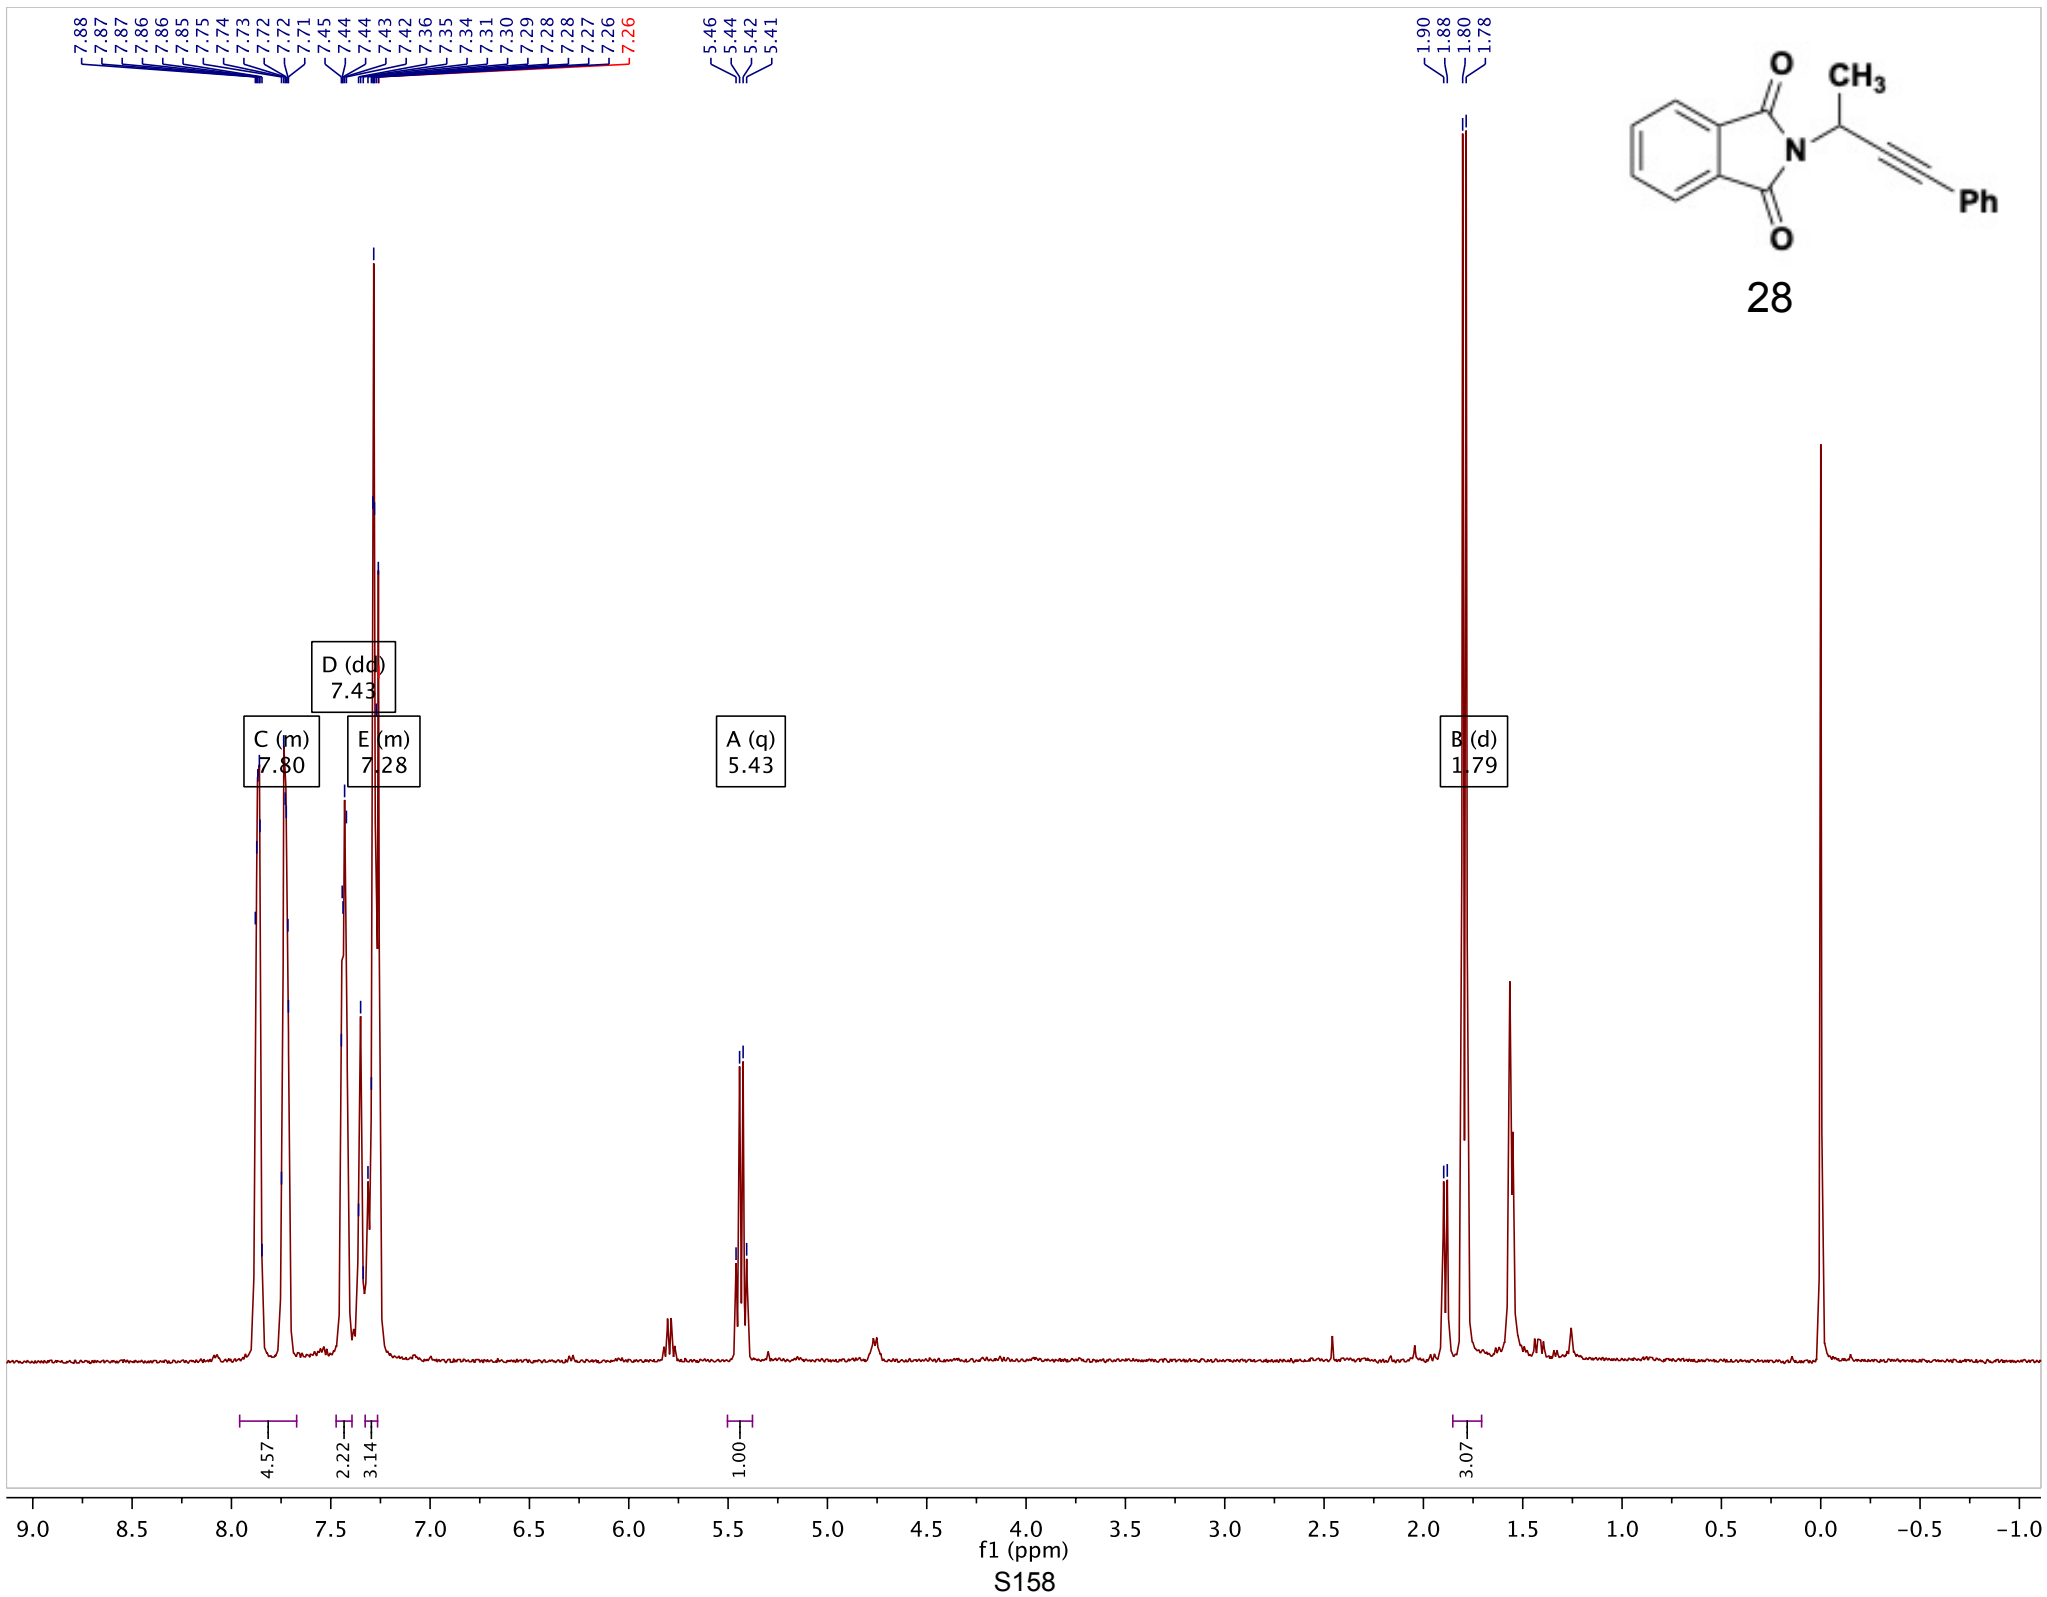

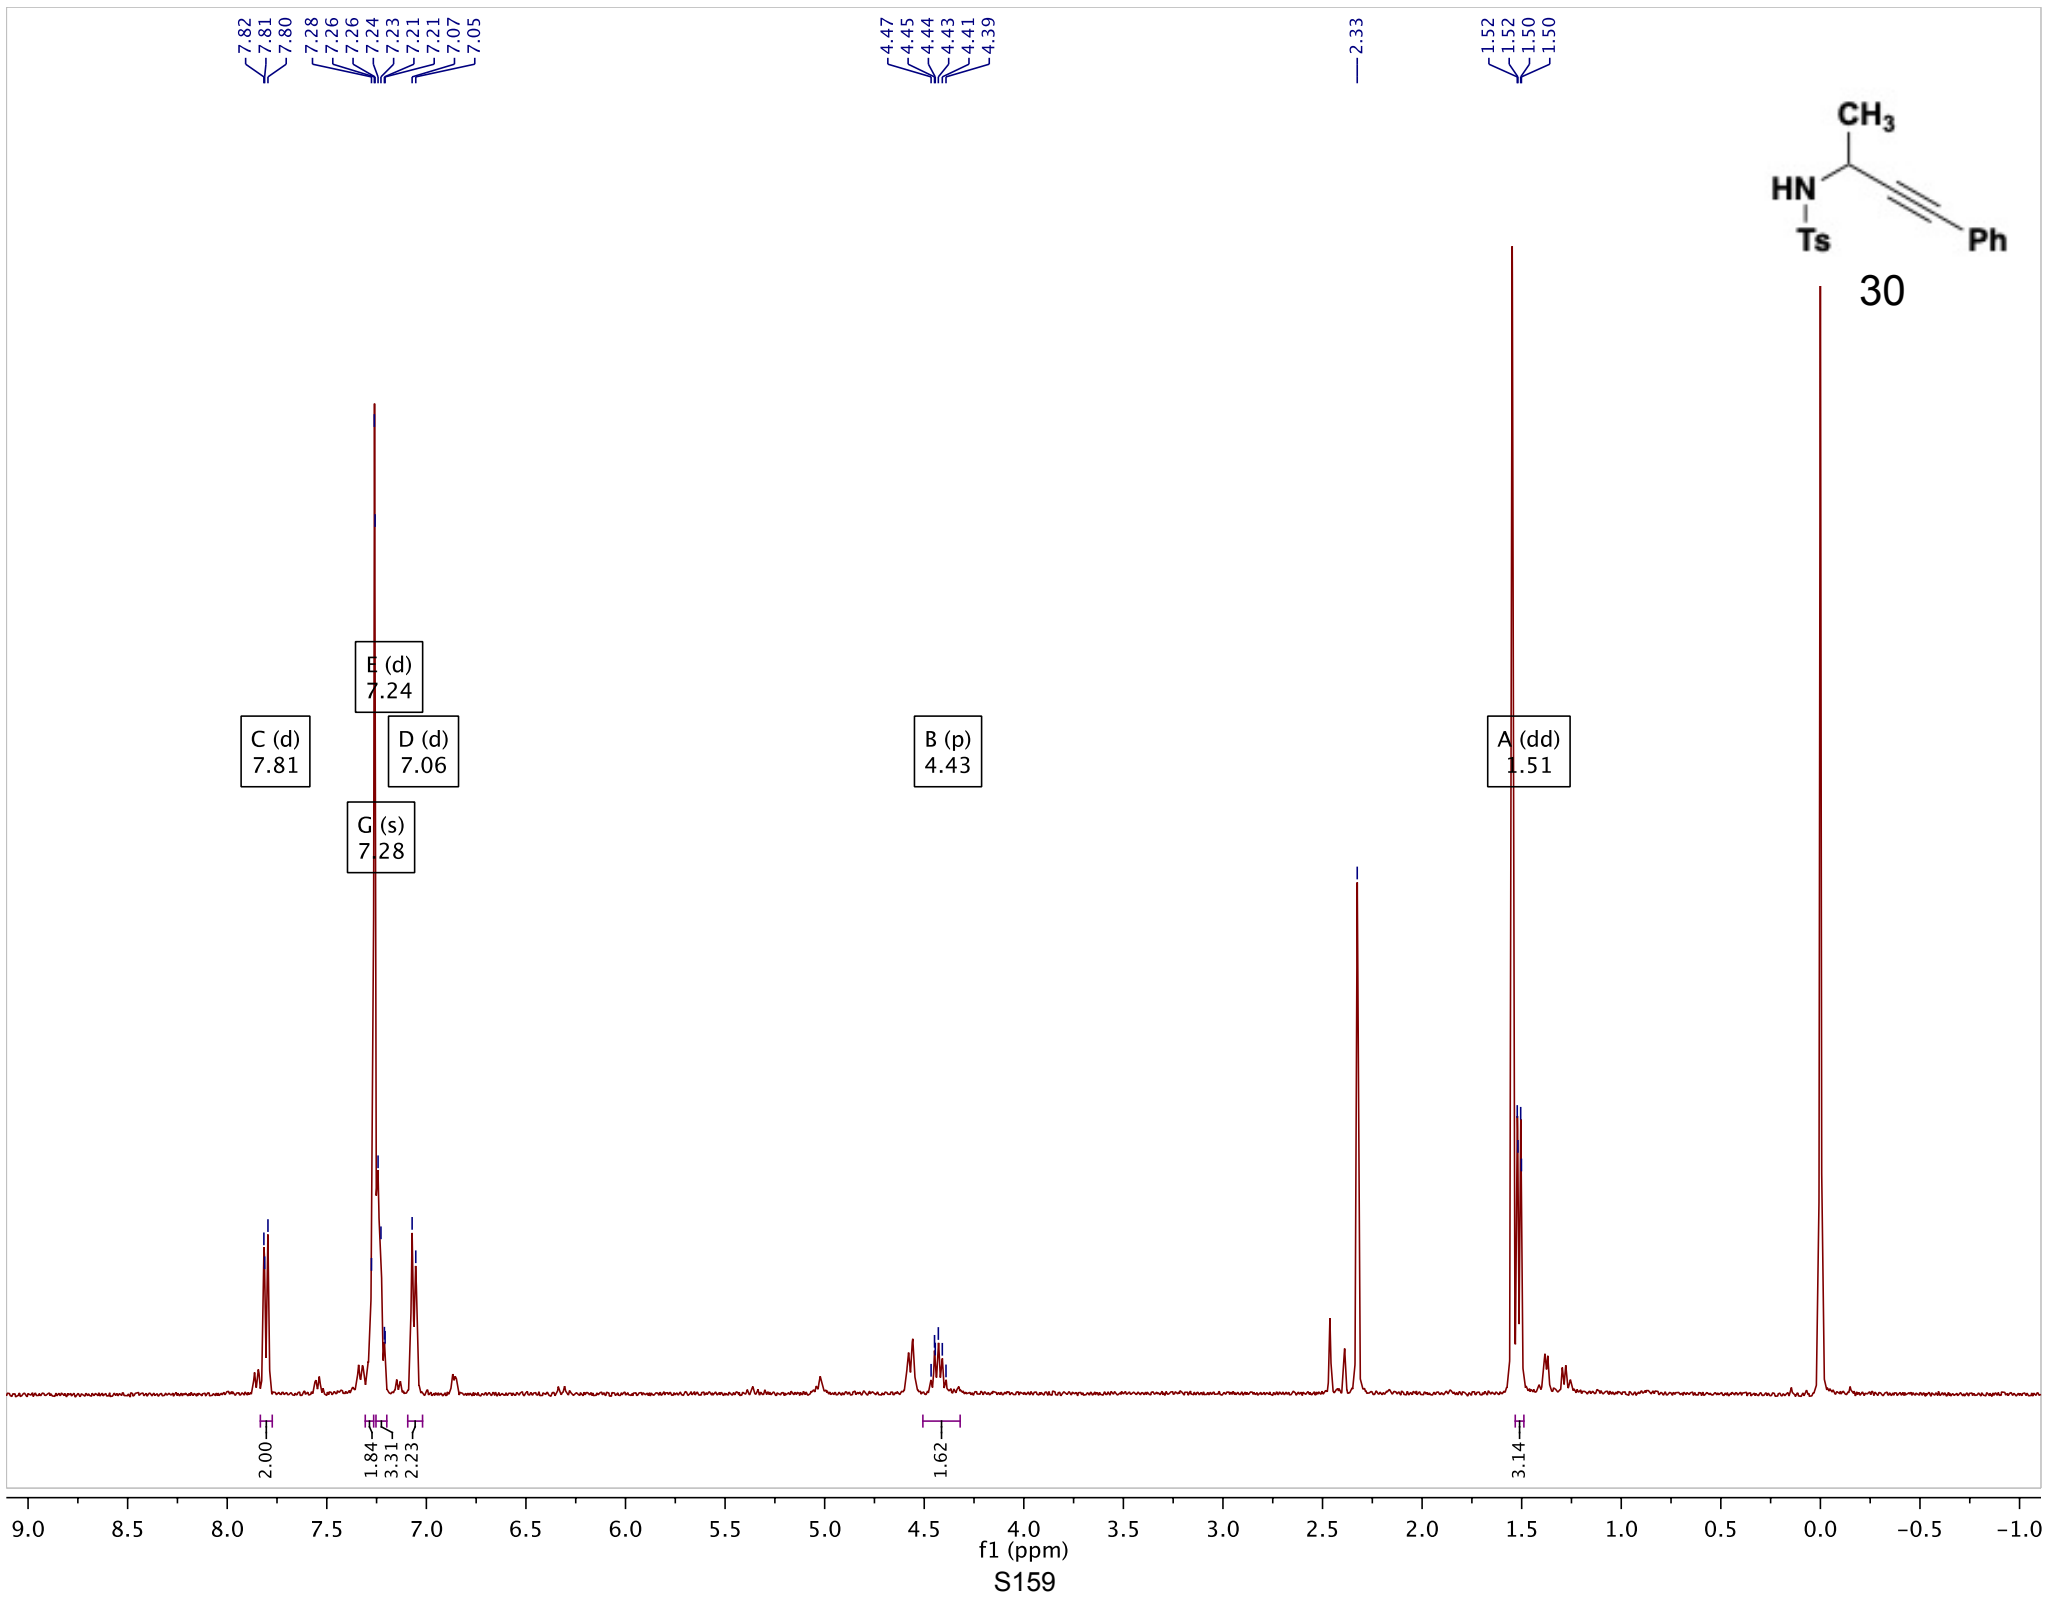

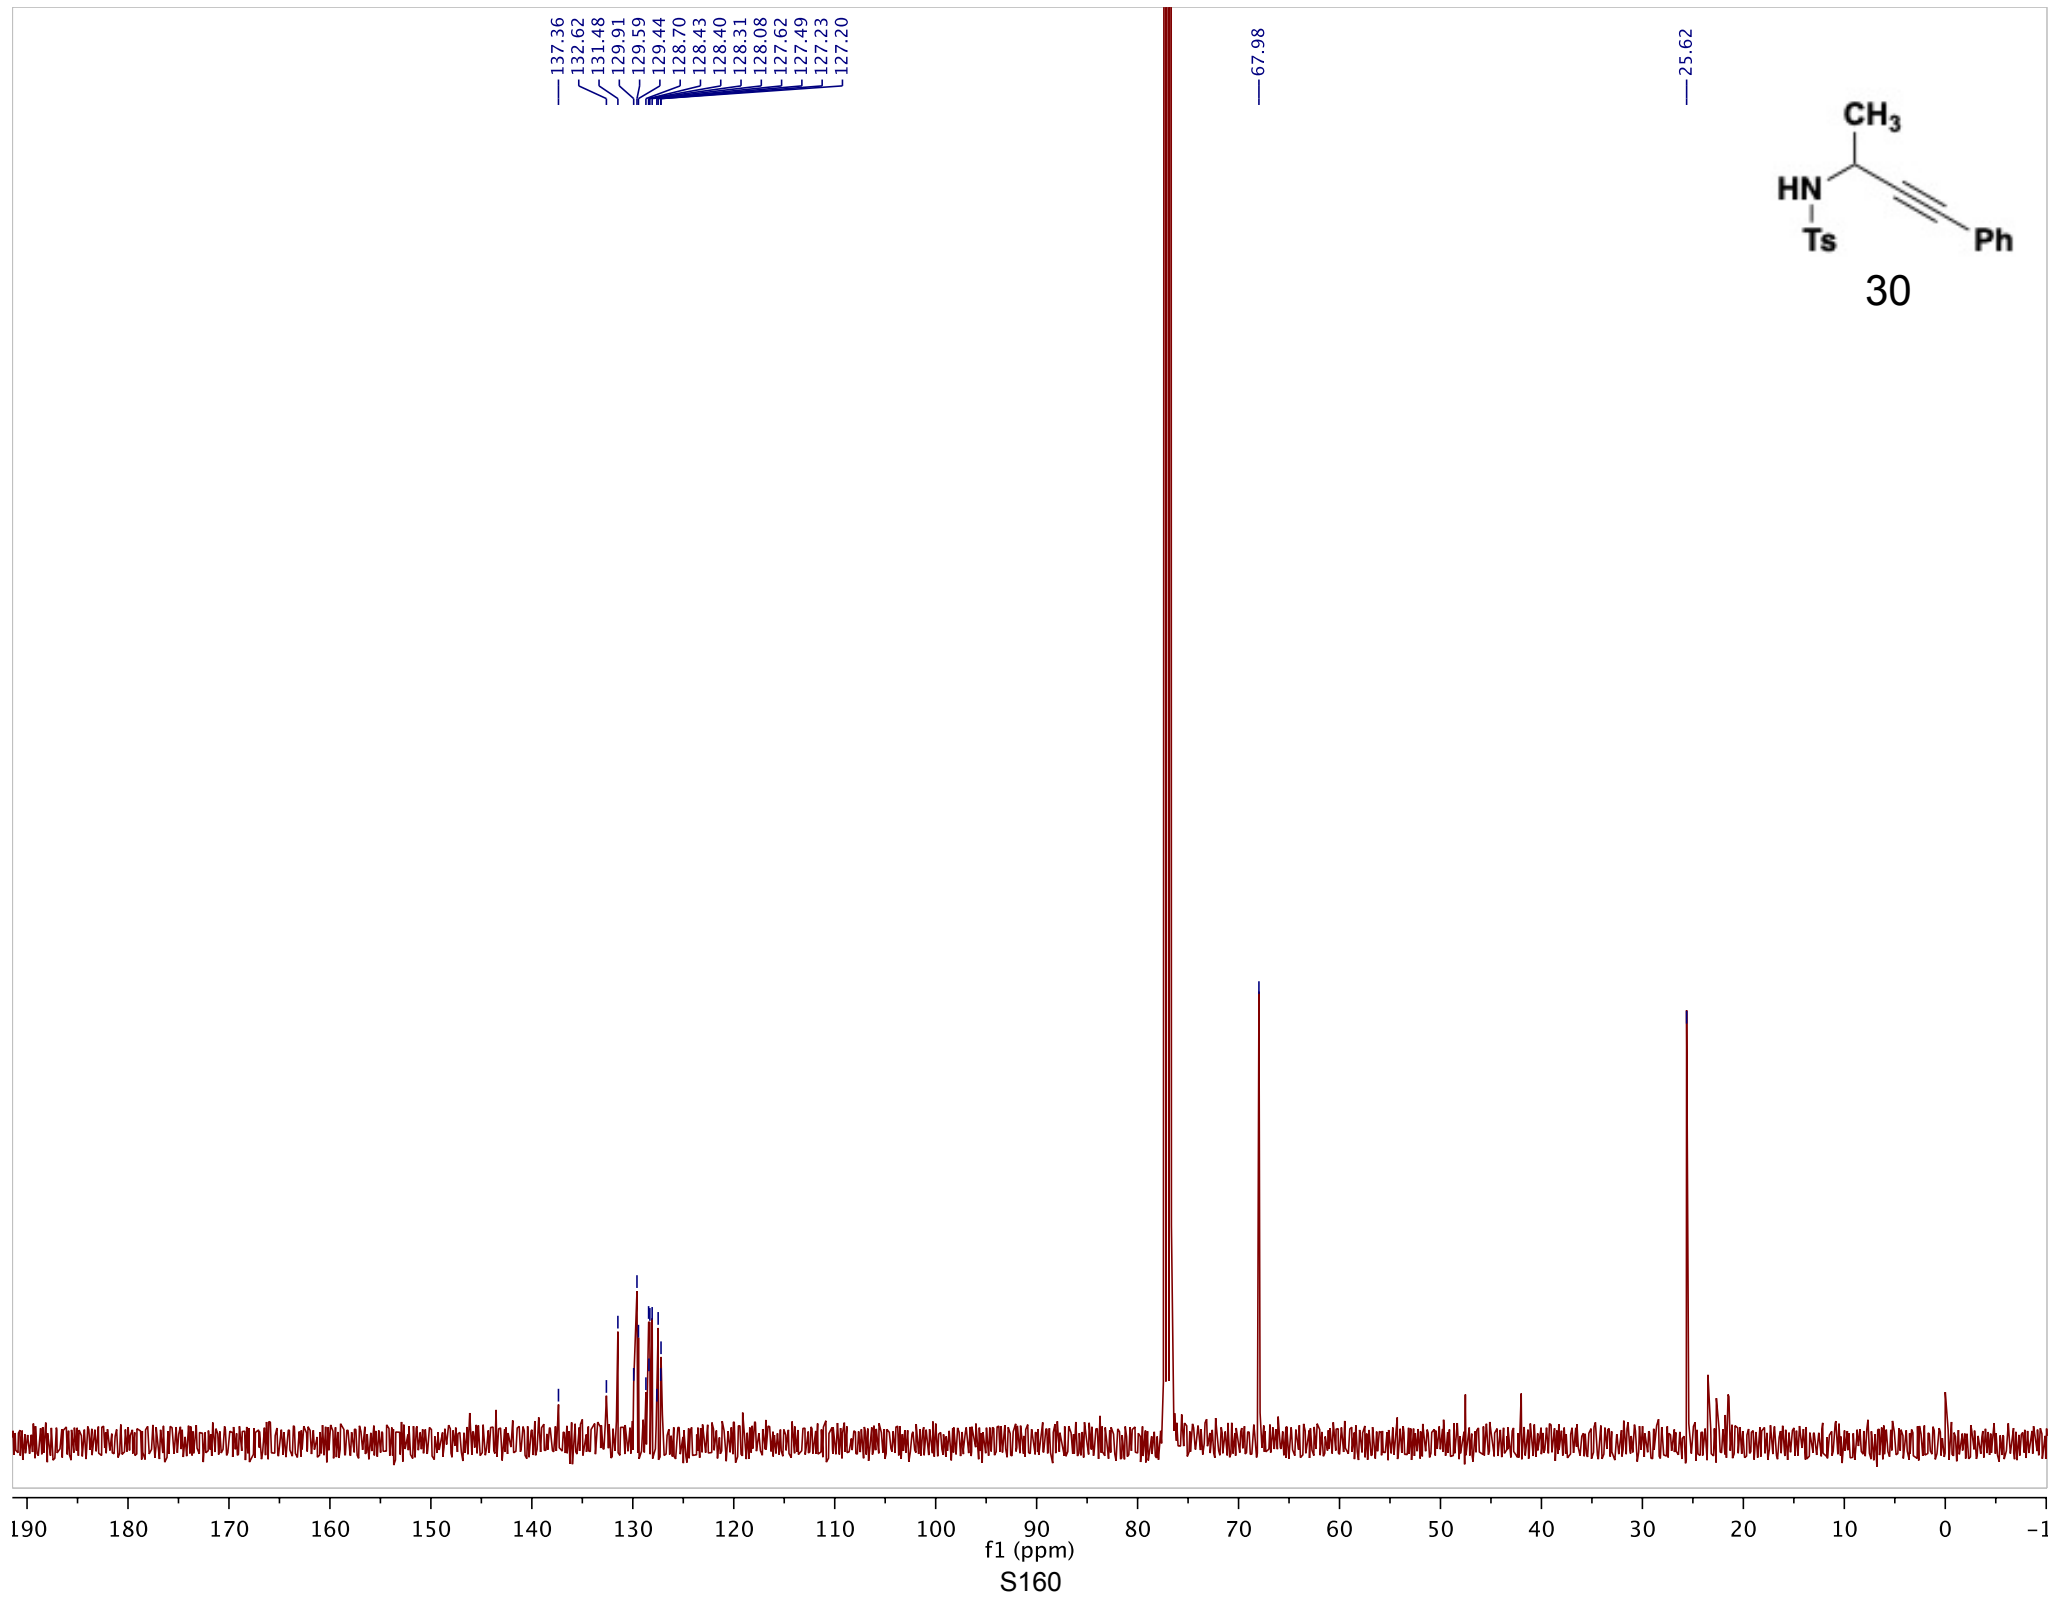



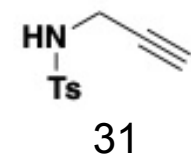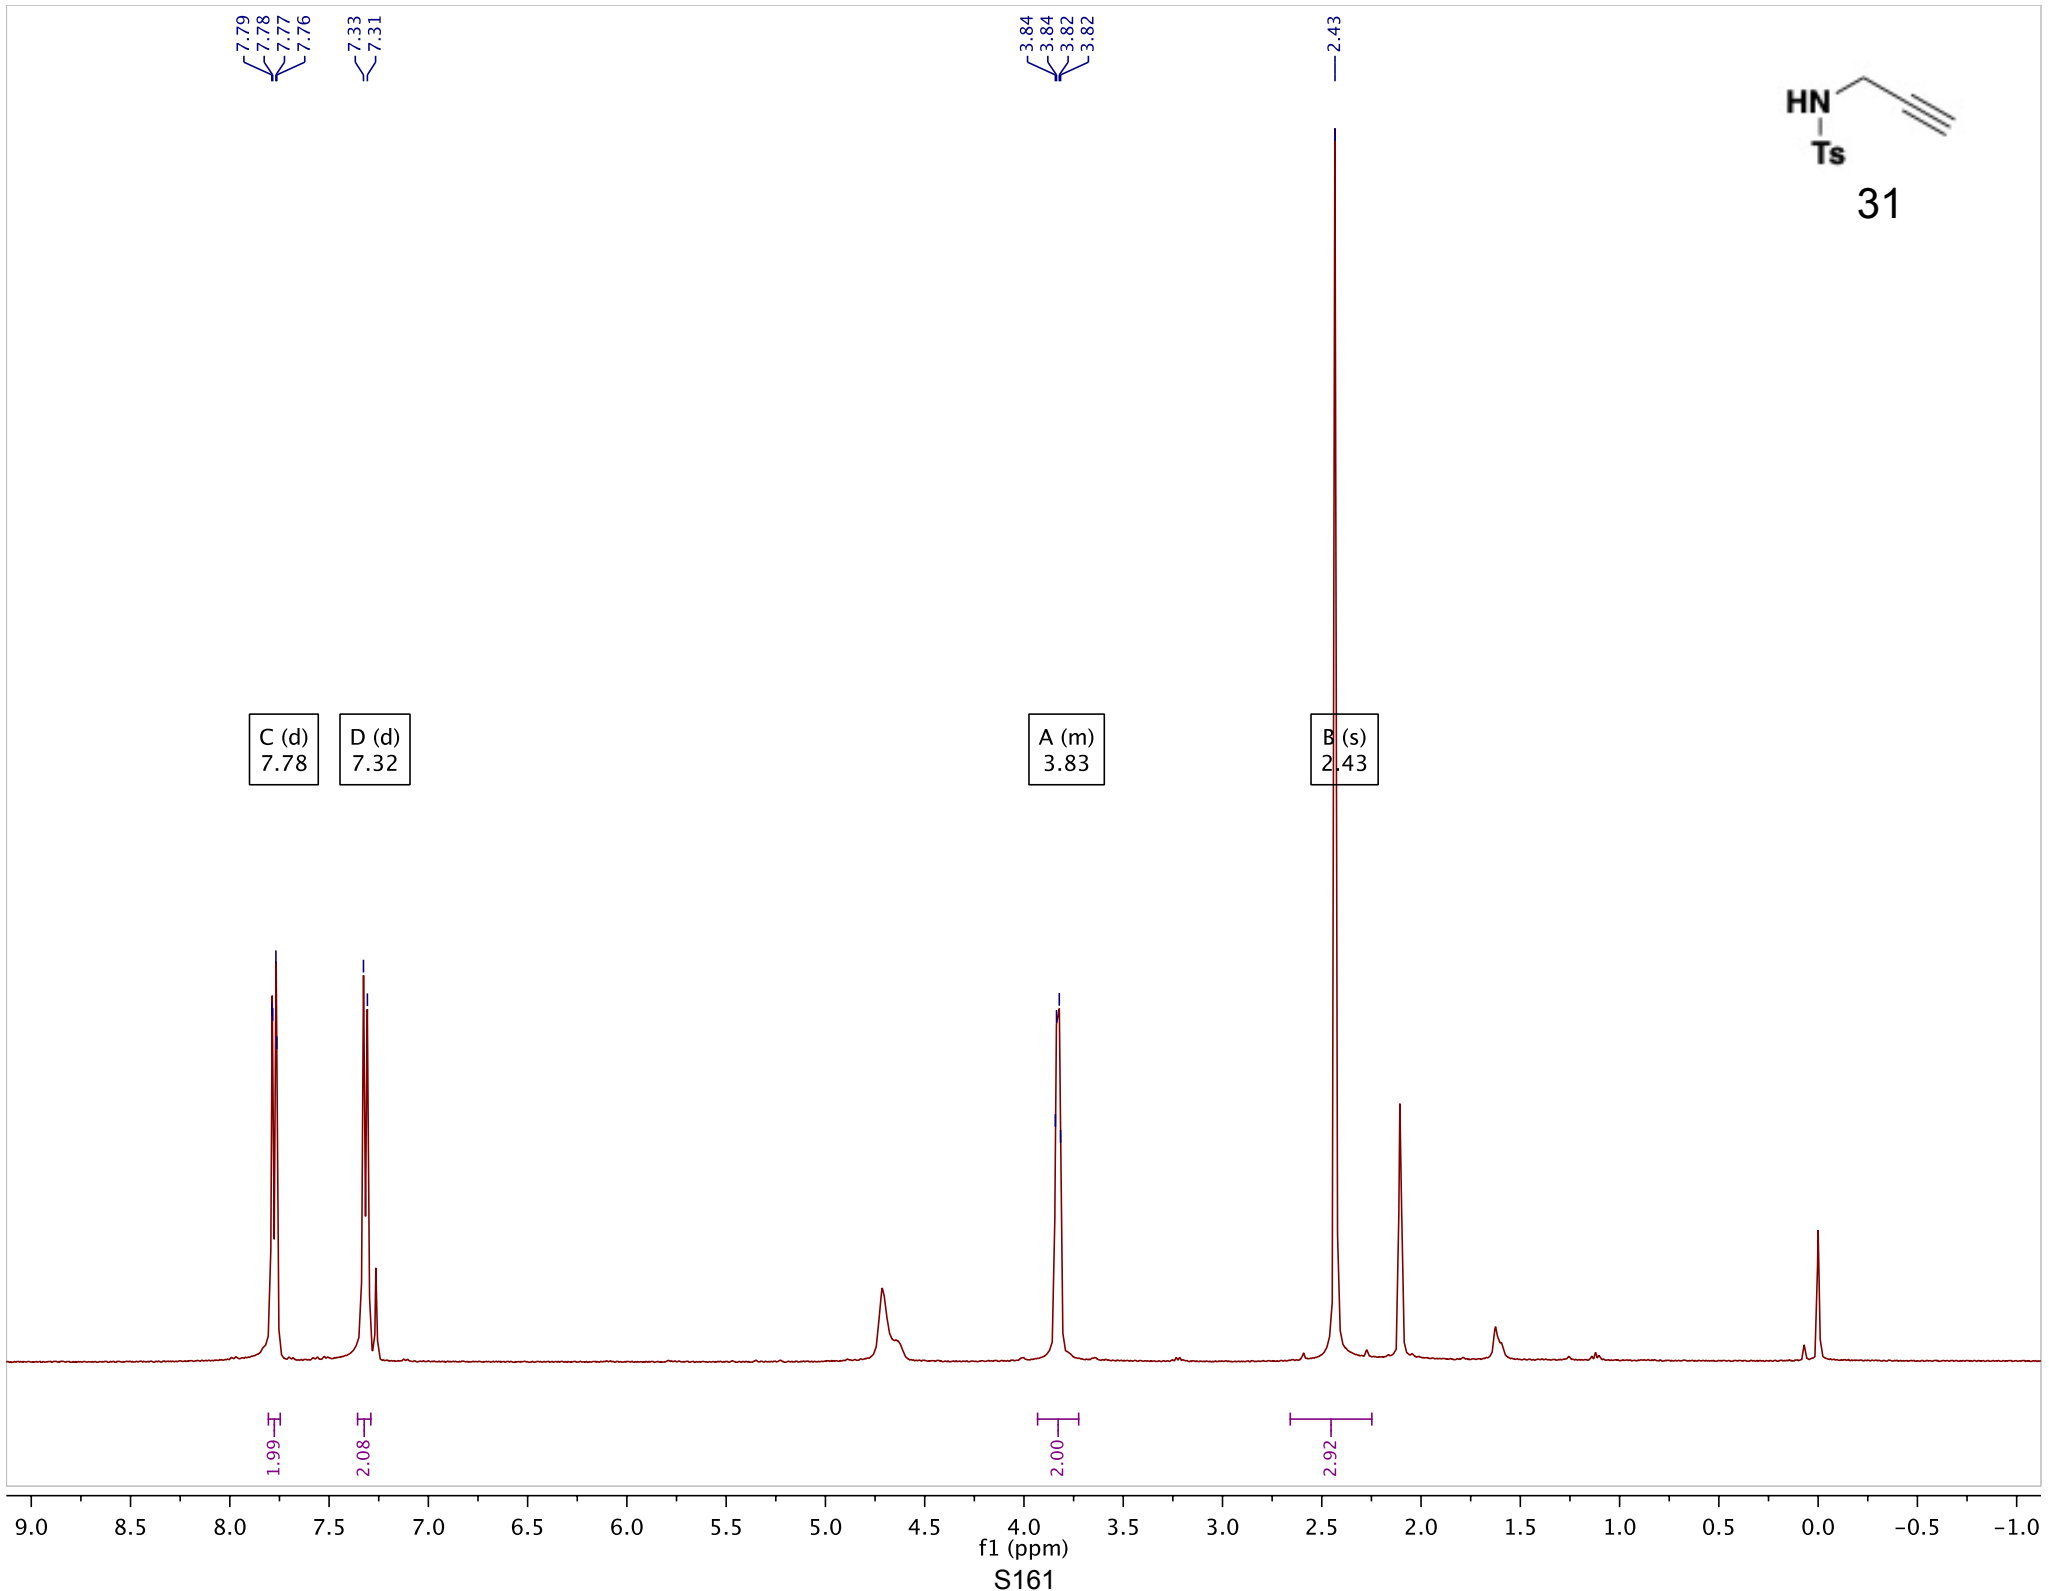

7.82  
7.81  
7.80  
7.31  
7.29  
7.27  
7.26  
7.25  
7.25  
7.23  
7.22  
7.15  
7.14  
7.13  
7.12

4.11  
4.09  
4.07

2.40  
2.36

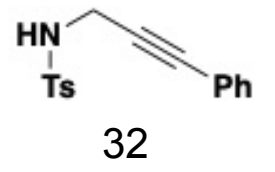

C (d)  
7.81

E (m)  
7.27

D (dd)  
7.13

A (d)  
4.08

B (s)  
2.36

1.99

5.90

2.04

2.00

2.91

9.0 8.5 8.0 7.5 7.0 6.5 6.0 5.5 5.0 4.5 4.0 3.5 3.0 2.5 2.0 1.5 1.0 0.5 -0.5 -1.0

f1 (ppm)

S162

## 6. Computational Work

### i. Computational Details

Geometries of all stationary points were fully optimized by using M062X/6-31+G(d,p)<sup>1,2</sup> with the Gaussian 09 package.<sup>3</sup> Solvation effects were included by considering the PCM (dichloromethane).<sup>4-6</sup>

All the reported energies - electronic energies (SCF), enthalpy (H), entropy corrections (TS) and Gibbs free energies (G) - are expressed in kcal/mol. The relative energies correspond to relative Gibbs free energies. The energies at the transition state structures (TSSs) are expressed as: relative Gibbs free energy (energy barrier) and at the products the energies are expressed as: relative Gibbs free energies (Maxwell Boltzman relative population, computed at T=298 K).

A frequency analysis was performed at all the stationary points, we confirmed that there were 0 imaginary frequencies for those structures identified as minima and 1 as those identified as TSS. The connectivity among the reactants, products and TSSs were confirmed by following the intrinsic reaction coordinate through IRC computations.<sup>7-9</sup> The stability of the wave function was checked for all the stationary points computed and reported in this manuscript. The visualization of all the stationary points was accomplished by using MOLDEN.<sup>10</sup>

A conformational analysis was carried out for each of the minima here presented by running molecular dynamics with the program Gabedit<sup>11,12</sup> and from the lowest-energy conformation the transition states were derived, as a consequence even the cartesian coordinates are going to be provided only for the lowest energy conformer (for the sake of clarity), the energy of all the explored conformations are also going to be presented.

In an attempt to decrease the computational demand of studying these systems, the experimentally chosen protecting group Tosylate was simulated as the smaller Mesilate, since the electronic and steric influence of both groups is expectedly similar.

Cartesian coordinates are divided into four sets:

- Set 1 corresponds to the cartesian coordinates for benzophenone derivatives (see A at **Figure S1**)
- Set 2 corresponds to the cartesian coordinates for alkylphenone derivatives without methylation at alpha position (see B at **Figure S1**)
- Set 3 corresponds to the cartesian coordinates for alkyl-methylated-phenone derivatives methylated at alpha position (see C at **Figure S1**)

Each set of Cartesians is going to be preceded by the report of the energies corresponding to the conformational study of each system.

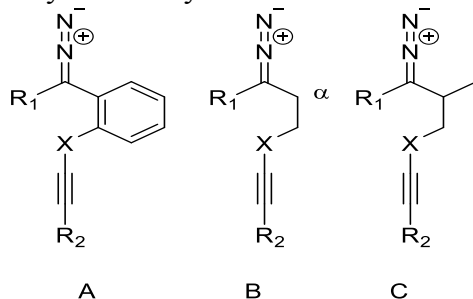

**Figure S1:** Scheme on the different diazoderivatives explored in the manuscript. In this figure R1, R2 and X represent different groups and/or heteroatoms.

A discussion on the effect of the alkyl chain in the diazo derivative is presented in the following section. The Cartesians related to this study are presented at set 4.

## ii. Discussion on some structural motives and their effect on the reaction outcome

In this manuscript it has been demonstrated, both experimentally and computationally, that alkyl and phenyl diazo derivatives are governed by a similar reactivity. Thus, the change on the nature of the migrating group from alkyl to aryl does not have a strong influence on the outcome of the reaction.

A rapid structural analysis of **B** would invite to suggest that the phenyl ring would migrate preferentially to the alkyl chain, according to their migration aptitude. In fact, such is the case for those systems in which the alkyl chain is removed (see **Figure S2**), for the cases computed (entries 1 and 2) the C-C migration of the phenyl group is energetically less demanding than that of the alkyl group, however in entry 3 the migration of the H results preferential. We have rationalized these results attending to the steric clash between the migrating systems and the methyl group. For the system X=H the steric clash among the H and the methyl groups is drastically reduced, and consequently this turns to be the preferred path. Thus, the migration seems to be controlled not only by the migratory ability of the migrating group (electronic properties) but also for the steric hindrance present at the position where the group is going to migrate.

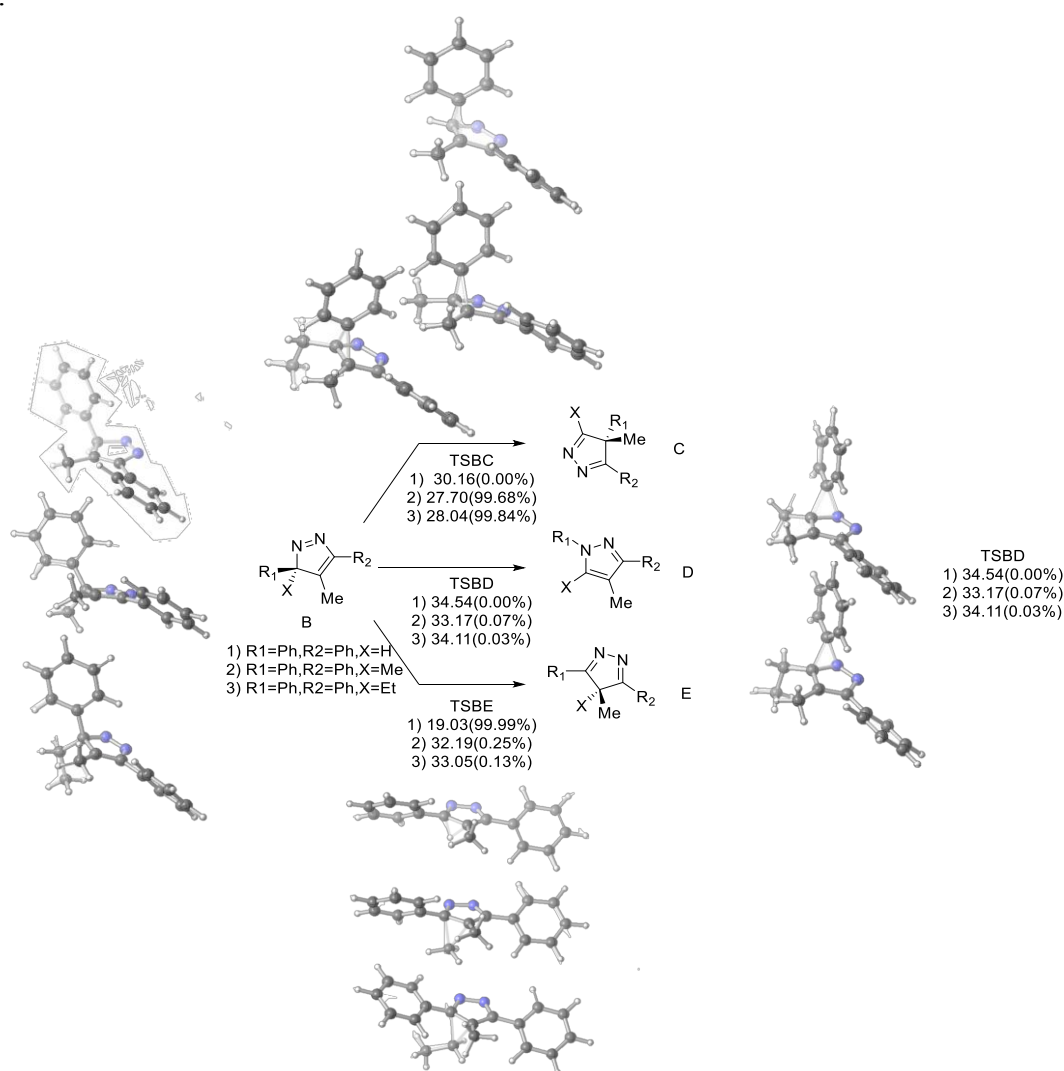

**Figure S2:** Analysis of the influence on the reaction outcome of the migrating group X (X=H, Me, Et).

**iii. Relative energies and barriers of the dipolar cycloadditions and subsequent rearrangements presented in the manuscript:**

**a) Report on the relative energies and barriers for the aryl derivatives:**

Computations reveal the insensitive nature of the DPC and subsequent C-C migration to the nature of the groups R1 and R2 and to the electronic nature of the alkyl chain. Thus, the substitution of the R2 group by Ph, Me and H reveals that the preferred evolution of intermediate **B** is the ring contraction yielding the spirocycle **E**. Similarly, the change of X from O to NMs and to CH<sub>2</sub> does not alter the reaction outcome, in all cases the spirocycle is formed selectively.

|                | FILE       | -SCF E     | -SCF+ZPVE   | H           | TS           | G            | ΔG     | ΔEr    |
|----------------|------------|------------|-------------|-------------|--------------|--------------|--------|--------|
| R1Ph_R2H_XO    | A_conf4    | 502779.654 | 502628.936  | -502618.195 | 39.2369072   | -502657.4317 | 0.00   |        |
|                | TS_A_B     | 502758.897 | 502608.278  | -502598.392 | 36.6045053   | -502634.997  | 22.43  |        |
|                | B_conf1    | 502827.241 | 502673.173  | -502663.936 | 35.3532516   | -502699.2892 | -41.86 | -64.29 |
|                | TS_B_C     | 502797.952 | 502644.899  | -502636     | 34.1132931   | -502670.1135 | -12.68 |        |
|                | C_conf1    | 502837.566 | 502683.206  | -502674.081 | 34.9290553   | -502709.0099 | -51.58 | -38.90 |
|                | TS_B_D     | 502795.342 | 502642.511  | -502633.553 | 34.208047    | -502667.7611 | -10.33 |        |
|                | D_conf1    | 502856.721 | 502701.609  | -502692.519 | 34.9303103   | -502727.4493 | -70.02 | -59.69 |
|                | TS_B_E     | 502802.108 | 502649.322  | -502640.296 | 35.2007668   | -502675.4963 | -18.06 |        |
| E              | 502837.44  | 502683.333 | -502674.026 | 35.5346018  | -502709.5608 | -52.13       | -34.06 |        |
| R1Ph_R2Me_XO   | A_conf11   | 527444.458 | 527275.707  | -527263.782 | 42.9712156   | -527306.7531 | 0.00   |        |
|                | TS_A_B     | 527421.825 | 527253.251  | -527242.276 | 39.1760388   | -527281.4519 | 25.30  |        |
|                | B          | 527491.186 | 527319.733  | -527309.392 | 37.7039018   | -527347.0957 | -40.34 | -65.64 |
|                | TS_B_C     | 527461.376 | 527290.983  | -527280.969 | 36.4444905   | -527317.4132 | -10.66 |        |
|                | C_conf5    | 527503.031 | 527331.186  | -527320.997 | 37.0443894   | -527358.0417 | -51.29 | -40.63 |
|                | TS_B_D     | 527458.818 | 527288.748  | -527278.587 | 37.0098764   | -527315.597  | -8.84  |        |
|                | D_conf1    | 527519.144 | 527346.759  | -527336.506 | 37.4792534   | -527373.9855 | -67.23 | -58.39 |
|                | TS_B_E     | 527464.772 | 527294.641  | -527284.47  | 37.5225516   | -527321.9927 | -15.24 |        |
| E              | 527502.99  | 527331.508 | -527321.093 | 37.9580431  | -527359.0511 | -52.30       | -37.06 |        |
| R1Ph_R2Ph_XCH2 | A_conf9    | 625201.988 | 624984.424  | -624970.53  | 48.9363199   | -625019.4659 | 0.00   |        |
|                | TS_A_B     | 625179.045 | 624961.739  | -624948.688 | 44.8148382   | -624993.5029 | 25.96  |        |
|                | B_conf4    | 625249.451 | 625029.102  | -625016.777 | 43.0433792   | -625059.82   | -40.35 | -66.32 |
|                | TS_B_C     | 625222.151 | 625002.787  | -624990.771 | 41.2505849   | -625032.0215 | -12.56 |        |
|                | C_conf2    | 625258.949 | 625038.097  | -625025.86  | 42.1397657   | -625067.9999 | -48.53 | -35.98 |
|                | TS_B_D     | 625218.588 | 624999.441  | -624987.384 | 41.5172764   | -625028.901  | -9.44  |        |
|                | D_conf3    | 625277.502 | 625056.214  | -625043.992 | 42.2232244   | -625086.215  | -66.75 | -57.31 |
|                | TS_B_E     | 625223.258 | 625004.129  | -624992.006 | 42.0010861   | -625034.0071 | -14.54 |        |
| E              | 625258.035 | 625037.593 | -625025.142 | 43.0082387  | -625068.1498 | -48.68       | -34.14 |        |
| R1Ph_R2Ph_XO   | A_conf6    | 647721.165 | 647518.594  | -647504.954 | 47.5156386   | -647552.4695 | 0.00   |        |
|                | TS_A_B     | 647699.862 | 647497.715  | -647484.81  | 44.6441557   | -647529.4541 | 23.02  |        |
|                | B_conf2    | 647768.12  | 647563.068  | -647550.823 | 42.7660201   | -647593.5893 | -41.12 | -64.14 |
|                | TS_B_C     | 647740.471 | 647536.398  | -647524.488 | 41.25686     | -647565.7444 | -13.27 |        |
|                | C_conf2    | 647780.126 | 647574.456  | -647562.389 | 41.7005091   | -647604.0893 | -51.62 | -38.34 |
|                | TS_B_D     | 647736.171 | 647532.233  | -647520.285 | 41.4746057   | -647561.7596 | -9.29  |        |
|                | D_conf2    | 647796.682 | 647590.578  | -647578.463 | 42.1792988   | -647620.6421 | -68.17 | -58.88 |
|                | TS_B_E     | 647742.169 | 647538.256  | -647526.244 | 42.062582    | -647568.3066 | -15.84 |        |
| E_conf4        | 647779.843 | 647574.45  | -647562.184 | 42.7798253  | -647604.9642 | -52.49       | -36.66 |        |
| R1Ph_R2Ph_XNMs | A          | 1004107.45 | 1003873.28  | -1003856.52 | 54.6604606   | -1003911.177 | 0.00   |        |
|                | TS_A_B     | 1004086.07 | 1003852.2   | -1003836.21 | 50.94435     | -1003887.149 | 24.03  |        |
|                | B          | 1004156.59 | 1003919.34  | -1003904.22 | 48.475728    | -1003952.697 | -41.52 | -65.55 |
|                | TS_B_C     | 1004129.16 | 1003893.09  | -1003878.24 | 47.6731435   | -1003925.917 | -14.74 |        |
|                | C_conf1    | 1004165.29 | 1003927.56  | -1003912.55 | 47.6574558   | -1003960.203 | -49.03 | -34.29 |
|                | TS_B_D     | 1004125.24 | 1003889.26  | -1003874.37 | 47.8017829   | -1003922.175 | -11.00 |        |
|                | D_conf1    | 1004185.26 | 1003947.17  | -1003932.08 | 48.8698039   | -1003980.955 | -69.78 | -58.78 |
|                | TS_B_E     | 1004129.65 | 1003893.79  | -1003878.78 | 47.8952818   | -1003926.676 | -15.50 |        |
| E_conf7        | 1004166.88 | 1003929.57 | -1003914.28 | 49.2576047  | -1003963.534 | -52.36       | -36.86 |        |

**Table S1:** Electronic and Gibbs free energies, enthalpies, entropic corrections and relative Gibbs free energies and reaction energies for the dipolar cycloaddition and rearrangements of benzophenone derivatives. All energies are reported in kcal/mol and computed at the M062X/6-31+G(d,p) computational level.

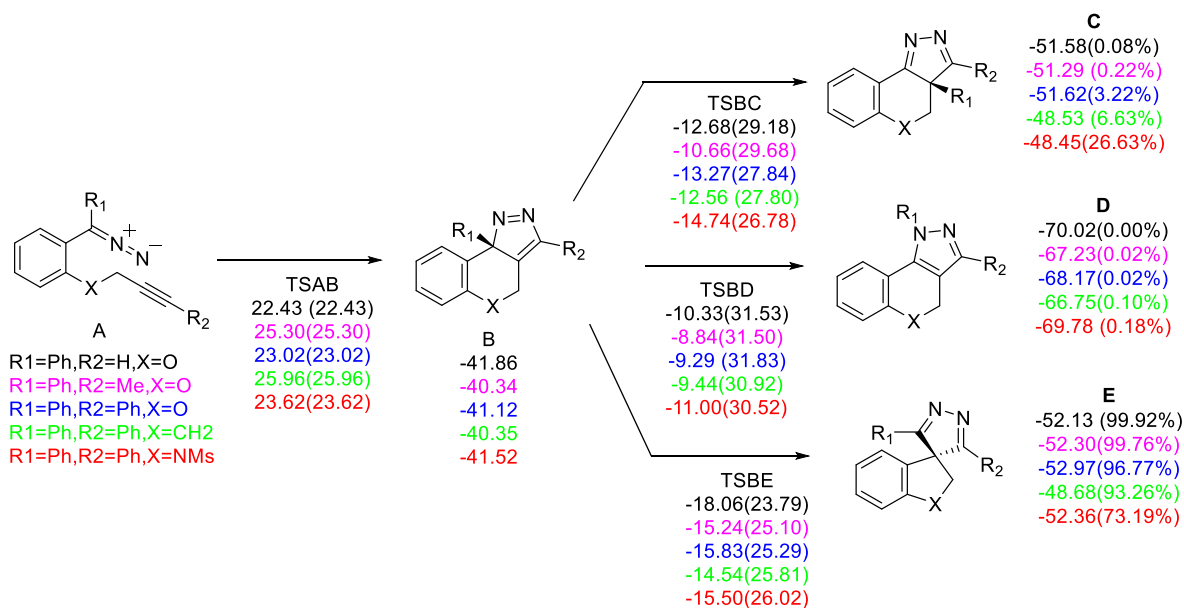

**Figure S3:** Analysis of the influence of the R1, R2 and X nature on the DPC and C-C migration reactions, in some of the most representative benzophenone derivatives studied. Compounds C, D, E correspond to those represented in **Figure 2** in the paper.

**b) Report on the relative energies and barriers for the alkyl systems:**

**b1) Systems non-methylated at position C5.**

|              | FILE        | SCF E       | SCF+ZPVE    | H           | TS           | G            | $\Delta G$ | $\Delta E_r$ |
|--------------|-------------|-------------|-------------|-------------|--------------|--------------|------------|--------------|
| R1Ph_R2Me_XO | A_conf15    | -431821.855 | -431668.308 | -431657.501 | 41.4444853   | -431698.9452 | 0          |              |
|              | TS_A_B      | -431801.19  | -431646.981 | -431637.559 | 35.0357319   | -431672.5944 | 26.35      |              |
|              | B           | -431871.903 | -431714.779 | -431706.03  | 33.6627413   | -431739.6928 | -40.75     | -67.10       |
|              | TS_B_C      | -431837.182 | -431681.172 | -431672.693 | 32.570875    | -431705.2643 | -6.32      |              |
|              | C_conf2     | -431881.994 | -431724.787 | -431716.049 | 33.5548097   | -431749.604  | -50.66     | -44.34       |
|              | TS_B_D      | -431838.625 | -431683.055 | -431674.415 | 33.3552617   | -431707.7704 | -8.83      |              |
|              | D_conf3     | -431898.04  | -431740.359 | -431731.523 | 34.0712499   | -431765.5946 | -66.65     | -57.82       |
|              | TS_B_E      | -431842.759 | -431686.865 | -431678.206 | 33.4876662   | -431711.6941 | -12.75     |              |
| E_conf1      | -431881.513 | -431724.427 | -431715.526 | 34.07376    | -431749.5998 | -50.65       | -37.91     |              |
| R1Ph_R2Ph_XO | A_conf8     | -552101.253 | -551913.482 | -551901.287 | 42.8896394   | -551944.1767 | 0.00       |              |
|              | TS_A_B      | -552079.552 | -551891.772 | -551880.424 | 40.5076138   | -551920.9315 | 23.25      |              |
|              | B_conf1     | -552148.672 | -551957.756 | -551947.144 | 38.4669532   | -551985.6107 | -41.43     | -64.68       |
|              | TS_B_C      | -552116.485 | -551926.611 | -551916.29  | 37.3060608   | -551953.5964 | -9.42      |              |
|              | C_conf2     | -552159.262 | -551968.228 | -551957.607 | 38.4280476   | -551996.0351 | -51.86     | -42.44       |
|              | TS_B_D      | -552115.861 | -551926.463 | -551916.007 | 37.9511405   | -551953.9578 | -9.78      |              |
|              | D_conf7     | -552175.707 | -551984.032 | -551973.406 | 38.6263406   | -552012.0327 | -67.86     | -58.07       |
|              | TS_B_E      | -552120.995 | -551931.229 | -551920.765 | 38.0007137   | -551958.7658 | -14.59     |              |
| E_conf4      | -552156.469 | -551965.442 | -551954.683 | 38.8378113  | -551993.5203 | -49.34       | -34.75     |              |
| R1P          | A_conf2     | -419361.104 | -419199.344 | -419188.557 | 40.3419513   | -419228.8991 | 0.00       |              |

|                |                            |             |             |             |              |              |        |        |
|----------------|----------------------------|-------------|-------------|-------------|--------------|--------------|--------|--------|
|                | TS_A_B                     | -419340.134 | -419178.028 | -419168.484 | 35.2948932   | -419203.779  | 25.12  |        |
|                | B_conf1                    | -419411.841 | -419246.67  | -419237.849 | 33.7662804   | -419271.6154 | -42.72 | -67.84 |
|                | TS_B_C                     | -419376.252 | -419212.271 | -419203.713 | 32.6769241   | -419236.3901 | -7.49  |        |
|                | C_conf4                    | -419421.711 | -419256.588 | -419247.719 | 34.3674344   | -419282.0859 | -53.19 | -45.70 |
|                | TS_B_D                     | -419377.596 | -419214.014 | -419205.322 | 33.3910298   | -419238.7131 | -9.81  |        |
|                | D_conf1                    | -419436.913 | -419271.256 | -419262.361 | 34.1346284   | -419296.4955 | -67.60 | -57.78 |
|                | TS_B_E                     | -419381.867 | -419218.037 | -419209.319 | 33.5165316   | -419242.8355 | -13.94 |        |
|                | E                          | -419418.227 | -419253.129 | -419244.214 | 34.0015964   | -419278.2154 | -49.32 | -35.38 |
| R1Ph_R2Me_XNMs | A_conf8                    | -788212.864 | -788027.164 | -788013.505 | 47.4372      | -788060.9418 | 0.00   |        |
|                | TS_A_B                     | -788190.808 | -788004.487 | -787992.148 | 41.7419247   | -788033.8896 | 27.05  |        |
|                | B_conf3                    | -788261.083 | -788072.004 | -788060.27  | 40.7529699   | -788101.0227 | -40.08 | -67.13 |
|                | TS_B_C                     | -788229.577 | -788042.055 | -788030.372 | 40.6626086   | -788071.0351 | -10.09 |        |
|                | C_conf5                    | -788270.893 | -788081.776 | -788069.983 | 40.5258115   | -788110.5084 | -49.57 | -39.47 |
|                | TS_B_D                     | -788224.096 | -788036.678 | -788024.916 | 40.8903945   | -788065.8062 | -4.86  |        |
|                | D_conf2                    | -788287.795 | -788098.23  | -788086.322 | 41.224857    | -788127.547  | -66.61 | -61.74 |
|                | TS_B_E                     | -788230.402 | -788042.476 | -788030.949 | 39.8355512   | -788070.7844 | -9.84  |        |
| E_conf6        | -788268.83                 | -788079.635 | -788067.8   | 40.7623826  | -788108.5621 | -47.62       | -37.78 |        |
| R1Ph_R2Ph_XNMs | A_conf18                   | -908490.756 | -908270.765 | -908255.605 | 49.7683974   | -908305.3733 | 0.00   |        |
|                | TS_A_B                     | -908469.047 | -908249.16  | -908234.883 | 47.2075315   | -908282.0907 | 23.28  |        |
|                | B                          | -908537.214 | -908314.463 | -908300.769 | 45.670761    | -908346.4402 | -41.07 | -64.35 |
|                | TS_B_C                     | -908508.58  | -908286.993 | -908273.555 | 44.6422731   | -908318.1971 | -12.82 |        |
|                | C_conf1                    | -908547.809 | -908324.858 | -908311.167 | 45.4580354   | -908356.6252 | -51.25 | -38.43 |
|                | TS_B_D                     | -908503.848 | -908282.507 | -908268.979 | 45.1373781   | -908314.1163 | -8.74  |        |
|                | D_conf2                    | -908564.412 | -908341.167 | -908327.296 | 46.7626274   | -908374.0582 | -68.68 | -59.94 |
|                | TS_B_E -<br>isom-<br>nocar | -908507.791 | -908286.328 | -908272.75  | 45.3199833   | -908318.0703 | -12.70 |        |
| E              | -908543.118                | -908320.022 | -908306.235 | 45.9857708  | -908352.2204 | -46.85       | -34.15 |        |

**Table S2:** Electronic and Gibbs Free Energies, enthalpies, entropic corrections and relative Gibbs free energies and reaction energies for the dipolar cycloaddition and rearrangements of alkyl-phenone derivatives. All energies are reported in kcal/mol and computed at the M062X/6-31+G(d,p) computational level.



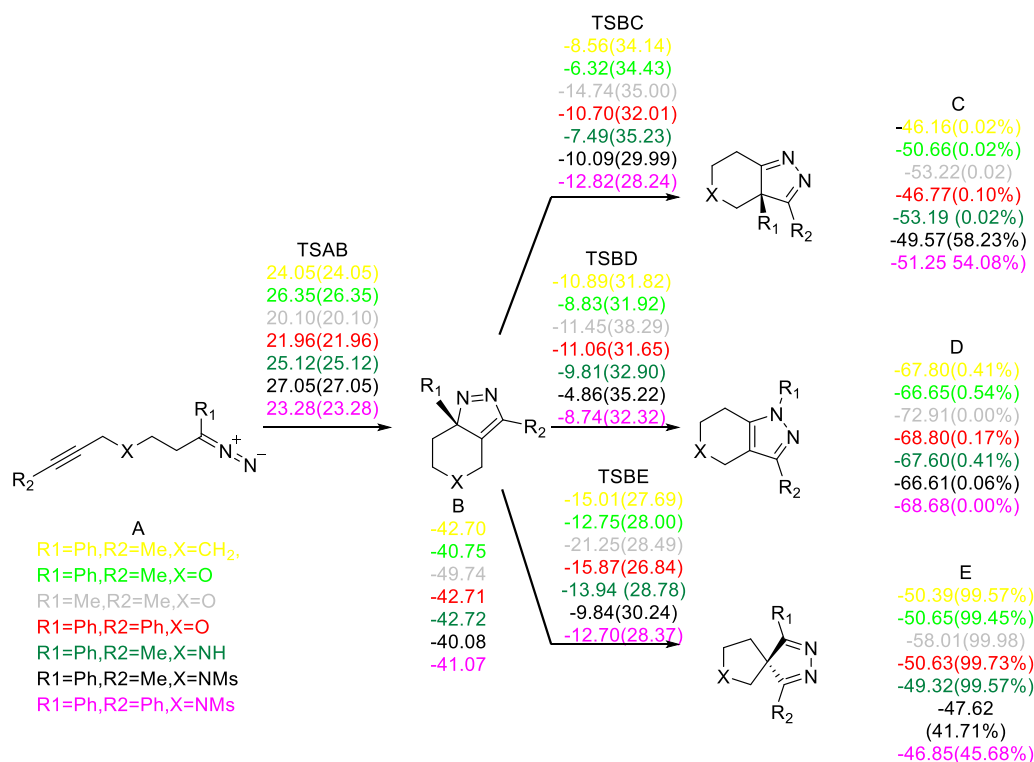

**Figure S4:** Analysis of the influence of the R1, R2 and X nature on the DPC and C-C migration reactions, at some of the most representative alkyl benzene studied derivatives.

From the results presented at **Figure S4** and **Table S2** it is clear that the electronic nature of the X group does not have an impact on the reaction outcome. Nonetheless, the protection of X with a bulky group introduces a strong steric component that has an impact on the reaction outcome. Specifically, the presence of the Mesilate group induces a lowering of the energy penalty of **TSBC** thus allowing the formation not only of the spirocycle **E** but also **C**. This effect is not observed in the aromatic substituents, please see **Table S1** and **Figure S3**, we propose that this result is the consequence of the greatest rigidity of the **B** intermediate, its structural restriction diminishes the steric impact of the protecting group on the evolution of the system.

## b2) Systems methylated at position C5.

|                 | FILE              | SCF E        | SCF+ZPVE    | H          | TS          | G           | ΔG     | ΔEr    |
|-----------------|-------------------|--------------|-------------|------------|-------------|-------------|--------|--------|
| R1Ph_R2Me_XO_Me | A_conf3           | -456484.6309 | -456313.369 | 456301.763 | 42.3970445  | -456344.16  | 0.00   |        |
|                 | TS_A_B_Meax       | -456461.2286 | -456289.368 | -456279.09 | 36.6785515  | -456315.768 | 28.39  |        |
|                 | B_Meax_conf1      | -456532.4536 | -456357.67  | 456348.038 | 35.3764695  | -456383.414 | -39.25 | -67.65 |
|                 | TS_B_C_Meax       | -456495.169  | -456321.412 | -456312.07 | 34.208047   | -456346.278 | -2.12  |        |
|                 | C_Meax_conf1      | -456542.2271 | -456367.385 | 456357.798 | 35.0093765  | -456392.807 | -48.65 | -46.53 |
|                 | TS_B_D_Meax       | -456500.2644 | -456327.12  | 456317.563 | 35.2685379  | -456352.831 | -8.67  |        |
|                 | D_Meax_conf3      | -456559.6083 | -456384.341 | -456374.62 | 35.8791045  | -456410.499 | -66.34 | -57.67 |
|                 | TS_B_E_Meax       | -456503.4017 | -456329.627 | 456320.148 | 34.9039549  | -456355.052 | -10.89 |        |
|                 | E_Meax_conf2      | -456543.5837 | -456368.892 | 456359.087 | 35.9638183  | -456395.051 | -50.89 | -40.00 |
|                 | A_conf3           | -456484.6309 | -456313.369 | 456301.763 | 42.3970445  | -456344.16  | 0.00   |        |
|                 | TS_A_B_Meec       | -456463.3414 | -456291.734 | 456281.366 | 37.0839225  | -456318.449 | 25.71  |        |
|                 | B_Meec_conf1      | -456533.2566 | -456358.464 | 456348.837 | 35.6255907  | -456384.462 | -40.30 | -66.01 |
|                 | TS_B_C_Meec       | -456498.6431 | -456324.847 | 456315.555 | 34.1245882  | -456349.68  | -5.52  |        |
|                 | C_Meec_conf1      | -456542.7877 | -456367.939 | 456358.355 | 35.0991103  | -456393.454 | -49.29 | -43.77 |
|                 | TS_B_D_Meec       | -456500.504  | -456327.179 | 456317.764 | 34.7878657  | -456352.552 | -8.39  |        |
|                 | D_Meec_conf1      | -456560.4461 | -456385.132 | 456375.469 | 35.681439   | -456411.15  | -66.99 | -58.60 |
| TS_B_E_Meec     | -456503.631       | -456329.948  | 456320.492  | 34.9961988 | -456355.489 | -11.33      |        |        |
| E_Meec          | -456542.9503      | -456368.351  | 456358.492  | 36.2361573 | -456394.728 | -50.57      | -39.24 |        |
| R1Ph_R2Ph_XO_Me | A_conf2           | -564299.4479 | -564086.023 | 564072.713 | 46.5229188  | -564119.236 | 0.00   |        |
|                 | TS_A_B_Meax-Hax   | -564277.787  | -564064.321 | 564052.032 | 42.2225969  | -564094.255 | 24.98  |        |
|                 | B_Meax_conf3      | -564349.1598 | -564132.496 | -564120.96 | 40.1461684  | -564161.107 | -41.87 | -66.85 |
|                 | TS_B_C_Meax-Hax   | -564314.1632 | -564098.572 | 564087.294 | 39.0731273  | -564126.367 | -7.13  |        |
|                 | C_Meax_conf1      | -564355.2254 | -564138.624 | 564127.007 | 40.0244315  | -564167.031 | -47.80 | -40.66 |
|                 | TS_B_D_Meax-Hax   | -564315.0566 | -564099.903 | 564088.469 | 39.9265401  | -564128.396 | -9.16  |        |
|                 | D_Meax            | -564374.9695 | -564157.871 | 564146.204 | 40.7956406  | -564187     | -67.76 | -58.60 |
|                 | TS_B_E_Meax_conf1 | -564314.6551 | -564099.31  | 564087.803 | 41.0824124  | -564128.885 | -9.65  |        |
|                 | E_Meax_conf4      | -564355.309  | -564138.798 | 564127.116 | 40.4988286  | -564167.615 | -48.38 | -38.73 |
|                 | A_Me_conf2        | -564299.4479 | -564086.023 | 564072.713 | 46.5229188  | -564119.236 | 0.00   |        |
|                 | TS_A_B_Meeq-Hax   | -564279.9588 | -564066.667 | 564054.303 | 42.4208899  | -564096.724 | 22.51  |        |
|                 | B_Meeq_conf6      | -564347.4925 | -564131.104 | 564119.473 | 40.8094458  | -564160.283 | -41.05 | -63.56 |
|                 | TS_B_C_Meeq-Hax   | -564318.7243 | -564103.484 | 564092.173 | 39.2318872  | -564131.405 | -12.17 |        |
|                 | C_Meeq_conf2      | -564358.7239 | -564141.991 | 564130.458 | 39.9296776  | -564170.388 | -51.15 | -38.98 |
|                 | TS_B_D_Meeq-Hax   | -564313.9189 | -564098.947 | 564087.481 | 40.0338442  | -564127.515 | -8.28  |        |
|                 | D_Meeq_conf3      | -564375.1852 | -564158.14  | -564146.48 | 40.7121818  | -564187.192 | -67.96 | -59.68 |
| TS_B_E_Meeq-Hax | -564318.8387      | -564103.546  | 564092.068  | 39.8681817 | -564131.936 | -12.70      | -35.82 |        |

|                   |                |              |             |            |             |             |        |        |
|-------------------|----------------|--------------|-------------|------------|-------------|-------------|--------|--------|
|                   | E_Meeq_conf5   | -564355.7219 | -564138.985 | 564127.326 | 40.4285476  | -564167.755 | -48.52 |        |
| R1Ph_R2Me_XNMs_Me | A_Me_conf14    | -812869.9136 | -812666.559 | 812651.936 | 49.6968613  | -812701.632 | 0.00   |        |
|                   | TS_A_B_Meax    | -812848.8259 | -812645.057 | 812631.723 | 43.8484738  | -812675.572 | 26.06  |        |
|                   | B_Meax_conf5   | -812920.8869 | -812714.205 | 812701.554 | 42.4736007  | -812744.027 | -42.39 | -68.46 |
|                   | TS_B_CMeax     | -812883.3208 | -812677.474 | 812665.168 | 41.0290741  | -812706.197 | -4.56  |        |
|                   | C_Meax_conf6   | -812921.6043 | -812714.864 | 812702.208 | 42.0261865  | -812744.234 | -42.60 | -38.04 |
|                   | TS_B_D_Meax    | -812888.2833 | -812683.013 | 812670.485 | 42.294133   | -812712.78  | -11.15 |        |
|                   | D_Meax_conf8   | -812948.97   | -812741.756 | 812728.985 | 43.2962655  | -812772.282 | -70.65 | -59.50 |
|                   | TS_B_E_Meax    | -812887.4142 | -812681.86  | 812669.398 | 42.1717687  | -812711.57  | -9.94  |        |
|                   | E_Meax_conf9   | -812928.5921 | -812721.763 | 812709.049 | 42.4899159  | -812751.538 | -49.91 | -39.97 |
|                   | A_conf14       | -812869.9136 | -812666.559 | 812651.936 | 49.6968613  | -812701.632 | 0.00   |        |
|                   | TS_A_B_Mec     | -812848.8406 | -812644.911 | 812631.721 | 43.3194833  | -812675.041 | 26.59  |        |
|                   | B_Meec_conf2   | -812918.7472 | -812712.233 | 812699.439 | 42.9793733  | -812742.418 | -40.79 | -67.38 |
|                   | TS_B_C_Meaxec  | -812888.5172 | -812682.969 | 812670.516 | 41.6176779  | -812712.134 | -10.50 |        |
|                   | C_Meec_conf3   | -812931.5075 | -812724.602 | 812712.063 | 41.3032957  | -812753.366 | -51.73 | -41.23 |
|                   | TS_B_D_Meaxec  | -812885.3199 | -812680.331 | 812667.647 | 42.6831888  | -812710.33  | -8.70  |        |
|                   | D_Meec_conf14  | -812948.97   | -812741.756 | 812728.985 | 43.2987755  | -812772.284 | -70.65 | -61.95 |
|                   | TS_B_E_Meaxec  | -812885.8791 | -812680.001 | -812667.67 | 41.1470458  | -812708.817 | -7.18  |        |
| E_Meec_conf3      | -812927.2893   | -812720.63   | 812707.876  | 42.9298    | -812750.805 | -49.17      | -41.99 |        |
| R1Ph_R2Ph_XNMs_Me | A_Me_conf7     | -933148.1093 | -932910.496 | 932894.449 | 52.1366178  | -932946.586 | 0.00   |        |
|                   | TS_A_B_Meax_Ph | -933127.1166 | -932889.672 | 932874.434 | 49.0787645  | -932923.512 | 23.07  |        |
|                   | B_Meax_conf1   | -933199.0004 | -932958.507 | 932944.006 | 46.9904133  | -932990.997 | -44.41 | -67.48 |
|                   | TS_B_C_Meax_Ph | -933162.4179 | -932922.956 | 932908.722 | 45.9569053  | -932954.679 | -8.09  |        |
|                   | C_Meax_conf5   | -933197.3776 | -932956.599 | 932942.142 | 46.7494497  | -932988.891 | -42.31 | -34.21 |
|                   | TS_B_D_Meax_Ph | -933164.344  | -932925.332 | 932910.927 | 46.9891583  | -932957.916 | -11.33 |        |
|                   | D_Meax_conf2   | -933226.0369 | -932984.896 | 932970.289 | 47.7584848  | -933018.048 | -71.46 | -60.13 |
|                   | TS_B_E_Meax_Ph | -933163.0457 | -932923.81  | -932909.43 | 46.7795701  | -932956.209 | -9.62  |        |
|                   | E_Meax_conf5   | -933204.1576 | -932963.587 | 932948.921 | 47.6248253  | -932996.546 | -49.96 | -40.34 |
|                   | A_Me_conf7     | -933148.1093 | -932910.496 | 932894.449 | 52.1366178  | -932946.586 | 0.00   |        |
|                   | TS_A_B_Meec_Ph | -933126.8663 | -932889.212 | 932874.134 | 48.4010544  | -932922.535 | 24.05  |        |
|                   | B_Meec_conf3   | -933196.1212 | -932955.796 | 932941.187 | 47.0588118  | -932988.246 | -41.66 | -65.71 |

|                |              |             |            |            |             |        |        |
|----------------|--------------|-------------|------------|------------|-------------|--------|--------|
| TS_B_C_Meec_Ph | -933168.1106 | -932928.959 | 932914.586 | 46.3905143 | -932960.977 | -14.39 |        |
| C_Meec_conf5   | -933207.7492 | -932967.14  | 932952.588 | 46.6804236 | -932999.269 | -52.68 | -38.29 |
| TS_B_D_Meec_Ph | -933166.198  | -932927.029 | 932912.758 | 45.9525128 | -932958.711 | -12.12 |        |
| D_Meec_conf4   | -933226.0369 | -932984.897 | -932970.29 | 47.7616223 | -933018.051 | -71.47 | -59.34 |
| TS_B_E_Meec_Ph | -933160.4549 | -932921.233 | 932906.856 | 46.5988474 | -932953.455 | -6.87  |        |
| E_Meec_Ph      | -933204.1576 | -932963.587 | 932948.921 | 47.6229428 | -932996.544 | -49.96 | -43.09 |

**Table S3:** Electronic and Gibbs Free Energies, enthalpies, entropic corrections and relative Gibbs free energies and reaction energies for the dipolar cycloaddition and rearrangements of alkyl-methylated-phenone derivatives. All energies are reported in kcal/mol and computed at the M062X/6-31+G(d,p) computational level.

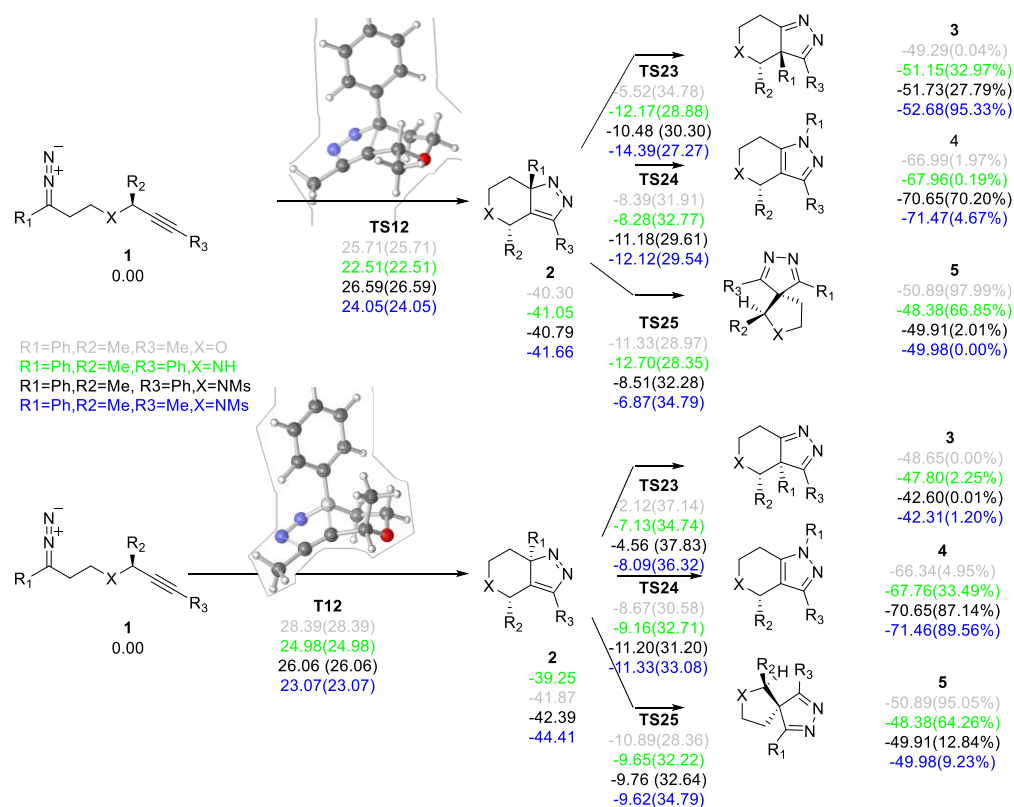

**Figure S4:** Analysis of the influence of the R1, R2, R3 and X nature on the DPC and C-C migration reactions, at some of the most representative alkyl-methylated benzene derivatives studied.

For the systems reported in this section we observe that the DPC reaction with the phenyl groups in axial-equatorial relative positions is only the preferred path when X is O and NH, because for those cases the 1,3-interaction between the phenyl and methyl groups is unfavourable. However, when the protecting group at the nitrogen position increases its volume (from H to Ts/Ms) then, the TSS

with the phenyl-methyl groups located at diaxial disposition is the preferred one. This preference is caused because it avoids the steric hindrance between the methyl and the mesylate groups (a 1,2-diequatorial interaction).

#### References:

- [1] Zhao, Y.; Truhlar, D. G. *Theor. Chem. Acc.* 2008, 120, 215–241
- [2] V. A. Rassolov, M. A. Ratner, J. A. Pople, P. C. Redfern and L. A. Curtiss, 6-31G\* basis set for third-row atoms, *J. Comput. Chem.*, 2001, 22, 976–984
- [3] M. J. Frisch, G. W. Trucks, H. B. Schlegel, G. E. Scuseria, M. A. Robb, J. R. Cheeseman, G. Scalmani, V. Barone, B. Mennucci, G. A. Petersson, H. Nakatsuji, M. Caricato, X. Li, H. P. Hratchian, A. F. Izmaylov, J. Bloino, G. Zheng, J. L. Sonnenberg, M. Hada, M. Ehara, K. Toyota, R. Fukuda, J. Hasegawa, M. Ishida, T. Nakajima, Y. Honda, O. Kitao, H. Nakai, T. Vreven, J. A. Montgomery, Jr., J. E. Peralta, F. Ogliaro, M. Bearpark, J. J. Heyd, E. Brothers, K. N. Kudin, V. N. Staroverov, R. Kobayashi, J. Normand, K. Raghavachari, A. Rendell, J. C. Burant, S. S. Iyengar, J. Tomasi, M. Cossi, N. Rega, J. M. Millam, M. Klene, J. E. Knox, J. B. Cross, V. Bakken, C. Adamo, J. Jaramillo, R. Gomperts, R. E. Stratmann, O. Yazyev, A. J. Austin, R. Cammi, C. Pomelli, J. W. Ochterski, R. L. Martin, K. Morokuma, V. G. Zakrzewski, G. A. Voth, P. Salvador, J. J. Dannenberg, S. Dapprich, A. D. Daniels, . Farkas, J. B. Foresman, J. V. Ortiz, J. Cioslowski, and D. J. Fox, *Gaussian 09* (Gaussian, Inc., Wallingford CT, 2009).
- [4] Tomasi, J.; Persico, M. *Molecular Interactions in Solution: An Overview of Methods Based on Continuous Distributions of the Solvent.* *Chem. Rev.* 1994, 94, 2027–2094.
- [5] Tomasi, J.; Mennucci, B.; Cammi, R. *Quantum Mechanical Continuum Solvation Models.* *Chem. Rev.* 2005, 105, 2999–3094.
- [6] Cancès, E.; Mennucci, B. *The Escaped Charge Problem in Solvation Continuum Models.* *J. Chem. Phys.* 2001, 115, 6130–6135.
- [7] C. González and H. B. Schlegel, *Reaction path following in mass-weighted internal coordinates,* *J. Phys. Chem.*, 1990, 94, 5523–5527.
- [8] K. Fukui, *The path of chemical reactions – the IRC approach,* *Acc. Chem. Res.*, 1981, 14, 363–368
- [9] S. Maeda, Y. Harabuchi, Y. Ono, T. Taketsugu and K. Morokuma, *Intrinsic reaction coordinate: Calculation, bifurcation, and automated search,* *Int. J. Quantum Chem.*, 2015, 115, 258–269
- [10] G. Schaftenaar and J. H. Noordik, "Molden: a pre- and post-processing program for molecular and electronic structures", *J. Comput. Aided Mol. Design*, 2000, 14, 123–134.
- [11] A. R. Allouche, E. Gabedit - A graphical user interface for computational chemistry softwares, *J. Comp. Chem.*, 2011, 32, 174–182.
- [12] To run the conformational analysis the amber potential was chosen, the number of selected geometries chosen was 20, the temperature chosen was 273 K, using a quasi Newton gradient.

#### iv. Cartesian coordinates

Set 1 corresponds to the cartesian coordinates for benzophenone derivatives:

**R1Ph\_R2H\_XO:**

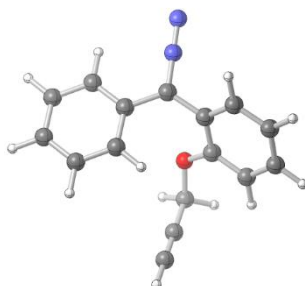

| FILE                 | SCF E       | SCF+ZPVE    | H           | TS         | G            |
|----------------------|-------------|-------------|-------------|------------|--------------|
| A_R1Ph_R2H_XO_conf4  | -502779.654 | -502628.936 | -502618.195 | 39.2369072 | -502657.4317 |
| A_R1Ph_R2H_XO_conf9  | -502779.662 | -502628.942 | -502618.202 | 39.2212195 | -502657.4235 |
| A_R1Ph_R2H_XO_conf10 | -502779.084 | -502628.513 | -502617.739 | 39.4138649 | -502657.1527 |
| A_R1Ph_R2H_XO        | -502779.256 | -502628.537 | -502617.741 | 39.4075898 | -502657.1487 |
| A_R1Ph_R2H_XO_conf5  | -502779.12  | -502628.363 | -502617.61  | 39.3743318 | -502656.9845 |
| A_R1Ph_R2H_XO_conf6  | -502779.12  | -502628.364 | -502617.611 | 39.3711943 | -502656.982  |
| A_R1Ph_R2H_XO_conf8  | -502779.12  | -502628.364 | -502617.611 | 39.3711943 | -502656.982  |
| A_R1Ph_R2H_XO_conf1  | -502778.601 | -502627.952 | -502617.138 | 39.5023437 | -502656.6403 |
| A_R1Ph_R2H_XO_conf3  | -502778.601 | -502627.951 | -502617.138 | 39.4715958 | -502656.6098 |
| A_R1Ph_R2H_XO_conf2  | -502778.601 | -502627.951 | -502617.139 | 39.4653207 | -502656.604  |
| A_R1Ph_R2H_XO_conf7  | -502778.595 | -502627.949 | -502617.138 | 39.4402203 | -502656.5781 |
| A_R1Ph_R2H_XO_conf11 | -502778.212 | -502627.72  | -502616.913 | 39.58894   | -502656.5019 |
| B_R1Ph_R2H_XO_conf1  | -502827.241 | -502673.173 | -502663.936 | 35.3532516 | -502699.2892 |
| B_R1Ph_R2H_XO        | -502827.241 | -502673.173 | -502663.936 | 35.3526241 | -502699.2886 |
| B_R1Ph_R2H_XO_conf2  | -502827.241 | -502673.173 | -502663.936 | 35.3513691 | -502699.2873 |
| C_R1Ph_R2H_XO_conf1  | -502837.566 | -502683.206 | -502674.081 | 34.9290553 | -502709.0099 |
| C_R1Ph_R2H_XO        | -502837.352 | -502682.986 | -502673.885 | 34.8154761 | -502708.7004 |
| C_R1Ph_R2H_XO_conf2  | -502837.352 | -502682.985 | -502673.884 | 34.8135935 | -502708.6979 |
| D_R1Ph_R2H_XO_conf1  | -502856.721 | -502701.609 | -502692.519 | 34.9303103 | -502727.4493 |
| D_R1Ph_R2H_XO_conf2  | -502856.721 | -502701.61  | -502692.52  | 34.9296828 | -502727.4493 |
| D_R1Ph_R2H_XO_conf3  | -502856.721 | -502701.61  | -502692.52  | 34.9296828 | -502727.4493 |
| D_R1Ph_R2H_XO        | -502856.721 | -502701.61  | -502692.52  | 34.9284278 | -502727.4481 |
| E_R1Ph_R2H_XO        | -502837.44  | -502683.333 | -502674.026 | 35.5346018 | -502709.5608 |
| E_R1Ph_R2H_XO_conf1  | -502837.44  | -502683.333 | -502674.026 | 35.5339743 | -502709.5602 |
| E_R1Ph_R2H_XO_conf2  | -502837.44  | -502683.333 | -502674.026 | 35.5333468 | -502709.5596 |
| TS_A_B_R1Ph_R2H_XO   | -502758.897 | -502608.278 | -502598.392 | 36.6045053 | -502634.997  |
| TS_B_C_R1Ph_R2H_XO   | -502797.952 | -502644.899 | -502636     | 34.1132931 | -502670.1135 |
| TS_B_D_R1Ph_R2H_XO   | -502795.342 | -502642.511 | -502633.553 | 34.208047  | -502667.7611 |
| TS_B_E_R1Ph_R2H_XO   | -502802.108 | -502649.322 | -502640.296 | 35.2007668 | -502675.4963 |

A\_R1Ph\_R2H\_XO\_conf4  
 SCF Energy: -801.230483994  
 Num. Imaginary Frequencies: 0

|   |           |           |           |
|---|-----------|-----------|-----------|
| C | -0.520447 | -1.386140 | 0.138294  |
| N | -0.824994 | -2.588665 | 0.539970  |
| N | -1.091194 | -3.638277 | 0.889233  |
| C | 0.915111  | -1.125847 | -0.114929 |
| C | 1.681257  | -2.005879 | -0.883556 |
| C | 1.538114  | 0.016473  | 0.427024  |
| C | 3.031175  | -1.763540 | -1.130418 |
| H | 1.201064  | -2.885464 | -1.304029 |
| C | 2.879053  | 0.285037  | 0.150910  |
| C | 3.620291  | -0.609675 | -0.621839 |
| H | 3.607824  | -2.458578 | -1.730827 |
| H | 3.357472  | 1.176633  | 0.538518  |
| H | 4.664879  | -0.394383 | -0.822164 |
| C | -1.628638 | -0.454300 | -0.118305 |
| C | -1.393260 | 0.727111  | -0.838813 |
| C | -2.933434 | -0.723280 | 0.324599  |
| C | -2.433397 | 1.613199  | -1.101221 |
| H | -0.391208 | 0.954298  | -1.190333 |
| C | -3.970930 | 0.164308  | 0.051765  |
| H | -3.142426 | -1.626048 | 0.892321  |
| C | -3.728903 | 1.339048  | -0.660379 |
| H | -2.227613 | 2.523494  | -1.656416 |
| H | -4.972227 | -0.063154 | 0.404318  |
| H | -4.538031 | 2.031599  | -0.867827 |
| O | 0.756075  | 0.786548  | 1.235422  |
| C | 1.212043  | 2.082084  | 1.593277  |
| H | 0.467280  | 2.459323  | 2.295822  |
| H | 2.173700  | 2.028213  | 2.116148  |
| C | 1.306536  | 2.982685  | 0.434243  |
| C | 1.378933  | 3.721480  | -0.517500 |
| H | 1.442977  | 4.373695  | -1.362243 |

B\_R1Ph\_R2H\_XO\_conf1  
 SCF Energy: -801.306319109  
 Num. Imaginary Frequencies: 0

|   |           |           |           |
|---|-----------|-----------|-----------|
| C | -0.153487 | 0.621700  | -0.418851 |
| N | -0.334228 | 1.342141  | -1.706400 |
| N | -0.364413 | 2.574895  | -1.503065 |
| C | 1.159660  | -0.132563 | -0.390744 |
| C | 1.583684  | -0.908018 | -1.474504 |
| C | 1.949801  | -0.077988 | 0.767405  |
| C | 2.774762  | -1.621375 | -1.418892 |
| H | 0.958003  | -0.943711 | -2.361402 |
| C | 3.146868  | -0.800598 | 0.827185  |
| C | 3.553464  | -1.564094 | -0.258979 |
| H | 3.093322  | -2.217434 | -2.266945 |
| H | 3.741104  | -0.743626 | 1.733002  |
| H | 4.484818  | -2.118265 | -0.200284 |
| C | -1.387123 | -0.251358 | -0.160372 |
| C | -1.273428 | -1.574402 | 0.265399  |
| C | -2.658018 | 0.316403  | -0.308325 |
| C | -2.420365 | -2.324628 | 0.537338  |
| H | -0.294141 | -2.027074 | 0.384458  |
| C | -3.798999 | -0.432882 | -0.040836 |
| H | -2.755143 | 1.348680  | -0.635609 |
| C | -3.682511 | -1.758560 | 0.383835  |
| H | -2.319817 | -3.353561 | 0.867693  |

|   |           |           |           |
|---|-----------|-----------|-----------|
| H | -4.779115 | 0.016617  | -0.164086 |
| H | -4.572345 | -2.343783 | 0.592517  |
| O | 1.648069  | 0.654466  | 1.879586  |
| C | 0.405187  | 1.375645  | 1.943151  |
| H | -0.342687 | 0.733037  | 2.424550  |
| H | 0.591234  | 2.248109  | 2.568556  |
| C | -0.027856 | 1.733317  | 0.570924  |
| C | -0.168031 | 2.872984  | -0.110752 |
| H | -0.120947 | 3.904529  | 0.209235  |

C\_R1Ph\_R2H\_XO\_conf1  
 SCF Energy: -801.322773063  
 Num. Imaginary Frequencies: 0

|   |           |           |           |
|---|-----------|-----------|-----------|
| C | 0.583867  | 1.242395  | -0.428938 |
| N | 0.605793  | 2.355979  | -1.074169 |
| N | -0.584898 | 3.079347  | -0.746604 |
| C | 1.659310  | 0.271026  | -0.292061 |
| C | 2.673091  | 0.078730  | -1.239118 |
| C | 1.647799  | -0.503026 | 0.882352  |
| C | 3.649617  | -0.885041 | -1.032399 |
| H | 2.665436  | 0.685009  | -2.139709 |
| C | 2.629867  | -1.472345 | 1.091700  |
| C | 3.618766  | -1.660683 | 0.133364  |
| H | 4.428956  | -1.039360 | -1.770285 |
| H | 2.604819  | -2.056942 | 2.004935  |
| H | 4.379742  | -2.416515 | 0.299243  |
| C | -1.590733 | -0.034870 | 0.016610  |
| C | -2.748354 | -0.246693 | 0.774065  |
| C | -1.359210 | -0.826216 | -1.110690 |
| C | -3.654749 | -1.240695 | 0.415743  |
| H | -2.950138 | 0.369268  | 1.646967  |
| C | -2.268751 | -1.822491 | -1.468765 |
| H | -0.469681 | -0.675147 | -1.714777 |
| C | -3.415569 | -2.033817 | -0.707440 |
| H | -4.548387 | -1.393601 | 1.012210  |
| H | -2.075114 | -2.432652 | -2.345153 |
| H | -4.120977 | -2.809619 | -0.987040 |
| O | 0.699691  | -0.351251 | 1.852006  |
| C | -0.070841 | 0.851803  | 1.843603  |
| H | -0.858772 | 0.703962  | 2.582024  |
| H | 0.561459  | 1.696400  | 2.145528  |
| C | -0.634626 | 1.082178  | 0.432641  |
| C | -1.247781 | 2.423044  | 0.134738  |
| H | -2.191349 | 2.792125  | 0.522993  |

D\_R1Ph\_R2H\_XO\_conf1  
 SCF Energy: -801.353299147  
 Num. Imaginary Frequencies: 0

|   |           |           |           |
|---|-----------|-----------|-----------|
| C | 0.524929  | 0.849703  | -0.069599 |
| N | -0.788930 | 1.205607  | -0.040949 |
| N | -0.939160 | 2.546787  | -0.000138 |
| C | 1.185243  | -0.448892 | -0.165319 |
| C | 0.612165  | -1.657908 | -0.575280 |
| C | 2.557453  | -0.423121 | 0.165297  |
| C | 1.370134  | -2.825213 | -0.605256 |
| H | -0.431370 | -1.684616 | -0.870585 |
| C | 3.311160  | -1.593604 | 0.149618  |
| C | 2.714244  | -2.793567 | -0.229881 |
| H | 0.912579  | -3.756036 | -0.922424 |

|   |           |           |           |
|---|-----------|-----------|-----------|
| H | 4.358756  | -1.543367 | 0.427093  |
| H | 3.306273  | -3.702904 | -0.247245 |
| C | -1.941355 | 0.371515  | 0.054761  |
| C | -2.010608 | -0.593859 | 1.057692  |
| C | -2.988128 | 0.553672  | -0.845884 |
| C | -3.139342 | -1.405907 | 1.141380  |
| H | -1.188055 | -0.704459 | 1.757767  |
| C | -4.119429 | -0.253239 | -0.743688 |
| H | -2.906511 | 1.318419  | -1.610973 |
| C | -4.193967 | -1.236514 | 0.243429  |
| H | -3.198556 | -2.162618 | 1.916700  |
| H | -4.939510 | -0.117524 | -1.441023 |
| H | -5.074132 | -1.866937 | 0.315830  |
| O | 3.177633  | 0.728011  | 0.570570  |
| C | 2.745199  | 1.941905  | -0.065446 |
| H | 3.223681  | 2.750445  | 0.487130  |
| H | 3.123140  | 1.947119  | -1.097440 |
| C | 1.254222  | 2.020298  | -0.025506 |
| C | 0.293451  | 3.046968  | 0.008268  |
| H | 0.437049  | 4.118217  | 0.040688  |

E\_R1Ph\_R2H\_XO\_conf1

SCF Energy: -801.322572010

Num. Imaginary Frequencies: 0

|   |           |           |           |
|---|-----------|-----------|-----------|
| C | -0.784608 | 1.253834  | -0.048654 |
| N | -1.046719 | 2.417238  | -0.540694 |
| N | 0.097624  | 3.259242  | -0.410726 |
| C | 1.508012  | 0.155555  | -0.233779 |
| C | 1.843067  | 0.017617  | -1.572838 |
| C | 1.963942  | -0.757743 | 0.711123  |
| C | 2.654107  | -1.058164 | -1.945352 |
| H | 1.481243  | 0.727419  | -2.311832 |
| C | 2.767359  | -1.835121 | 0.364388  |
| C | 3.106116  | -1.967680 | -0.984836 |
| H | 2.932899  | -1.188106 | -2.985217 |
| H | 3.110985  | -2.538649 | 1.114224  |
| H | 3.735169  | -2.797693 | -1.290137 |
| C | -1.770550 | 0.161667  | -0.046659 |
| C | -1.489274 | -1.073056 | 0.552423  |
| C | -3.020583 | 0.359746  | -0.654753 |
| C | -2.442208 | -2.090864 | 0.543918  |
| H | -0.533236 | -1.253820 | 1.032534  |
| C | -3.965981 | -0.657904 | -0.662354 |
| H | -3.234378 | 1.316351  | -1.119177 |
| C | -3.679353 | -1.887316 | -0.062727 |
| H | -2.213252 | -3.042589 | 1.011997  |
| H | -4.928263 | -0.495337 | -1.136946 |
| H | -4.418946 | -2.681609 | -0.070047 |
| O | 1.507657  | -0.503773 | 1.969436  |
| C | 0.846043  | 0.774950  | 1.962457  |
| H | -0.093934 | 0.677916  | 2.507418  |
| H | 1.493163  | 1.494258  | 2.470495  |
| C | 0.639220  | 1.183143  | 0.471851  |
| C | 1.031980  | 2.596180  | 0.158984  |
| H | 2.007217  | 3.027627  | 0.361985  |

TS\_A\_B\_R1Ph\_R2H\_XO

SCF Energy: -801.197406899

Num. Imaginary Frequencies: 1

Imaginary Frequency: -502.9657

|   |           |           |           |
|---|-----------|-----------|-----------|
| C | -0.150860 | 0.441759  | -0.586071 |
| N | -0.256547 | 1.308442  | -1.612410 |
| N | -0.414633 | 2.417780  | -1.876097 |
| C | 1.197375  | -0.182510 | -0.426891 |
| C | 1.750832  | -0.918523 | -1.486530 |
| C | 1.931838  | -0.061300 | 0.763779  |
| C | 3.005104  | -1.505288 | -1.391928 |
| H | 1.167465  | -1.018637 | -2.397811 |
| C | 3.193873  | -0.663464 | 0.862562  |
| C | 3.726756  | -1.374020 | -0.202381 |
| H | 3.412951  | -2.060531 | -2.229336 |
| H | 3.739815  | -0.547933 | 1.793012  |
| H | 4.707448  | -1.828272 | -0.103631 |
| C | -1.381707 | -0.339475 | -0.294263 |
| C | -1.286894 | -1.597024 | 0.314749  |
| C | -2.651554 | 0.201685  | -0.549680 |
| C | -2.440570 | -2.298215 | 0.665311  |
| H | -0.310296 | -2.027935 | 0.514580  |
| C | -3.797925 | -0.505978 | -0.207297 |
| H | -2.741744 | 1.179916  | -1.013697 |
| C | -3.697871 | -1.758500 | 0.404107  |
| H | -2.351708 | -3.271123 | 1.138034  |
| H | -4.773502 | -0.077468 | -0.413632 |
| H | -4.594760 | -2.307154 | 0.672590  |
| O | 1.551912  | 0.620287  | 1.879172  |
| C | 0.239403  | 1.173838  | 2.008859  |
| H | -0.491621 | 0.363274  | 2.114093  |
| H | 0.279003  | 1.733444  | 2.944394  |
| C | -0.120682 | 2.056802  | 0.882805  |
| C | -0.380098 | 3.109117  | 0.287360  |
| H | -0.582223 | 4.143155  | 0.100627  |

TS\_B\_C\_R1Ph\_R2H\_XO

SCF Energy: -801.259643701

Num. Imaginary Frequencies: 1

Imaginary Frequency: -555.2526

|   |           |           |           |
|---|-----------|-----------|-----------|
| C | 0.022391  | 0.841351  | -0.585263 |
| N | -0.403673 | 1.584564  | -1.652879 |
| N | -1.177534 | 2.554373  | -1.179340 |
| C | 1.277826  | 0.082324  | -0.538604 |
| C | 1.787323  | -0.647311 | -1.613929 |
| C | 1.996781  | 0.150806  | 0.665827  |
| C | 3.011957  | -1.295133 | -1.503902 |
| H | 1.211712  | -0.690475 | -2.533668 |
| C | 3.228619  | -0.497733 | 0.776820  |
| C | 3.728657  | -1.213652 | -0.305506 |
| H | 3.408009  | -1.858919 | -2.341234 |
| H | 3.774539  | -0.428361 | 1.711581  |
| H | 4.685604  | -1.716968 | -0.211475 |
| C | -1.354025 | -0.167487 | 0.057295  |
| C | -0.983007 | -1.335582 | 0.715524  |
| C | -2.615696 | -0.049887 | -0.528612 |
| C | -1.889075 | -2.396881 | 0.795754  |
| H | 0.004241  | -1.453173 | 1.150884  |
| C | -3.503337 | -1.113013 | -0.450922 |
| H | -2.903835 | 0.863219  | -1.039994 |
| C | -3.146900 | -2.291248 | 0.215314  |
| H | -1.592822 | -3.305695 | 1.308823  |
| H | -4.482430 | -1.019113 | -0.908848 |
| H | -3.848642 | -3.116198 | 0.276313  |



|   |           |          |          |
|---|-----------|----------|----------|
| O | 1.583486  | 0.878044 | 1.748303 |
| C | 0.192063  | 1.172146 | 1.945323 |
| H | -0.265623 | 0.360248 | 2.517156 |
| H | 0.169143  | 2.080648 | 2.547337 |
| C | -0.501930 | 1.416692 | 0.636449 |
| C | -1.239613 | 2.520524 | 0.159331 |
| H | -1.831530 | 3.232373 | 0.716832 |

|   |          |          |          |
|---|----------|----------|----------|
| C | 0.845514 | 2.723345 | 0.693252 |
| H | 1.132502 | 3.762016 | 0.585767 |

TS\_B\_E\_R1Ph\_R2H\_XO  
 SCF Energy: -801.266267678  
 Num. Imaginary Frequencies: 1  
 Imaginary Frequency: -514.5067

TS\_B\_D\_R1Ph\_R2H\_XO  
 SCF Energy: -801.255484962  
 Num. Imaginary Frequencies: 1  
 Imaginary Frequency: -583.9048

|   |           |           |           |
|---|-----------|-----------|-----------|
| C | -0.040967 | 0.715206  | 0.562683  |
| N | 0.856804  | 0.762304  | 1.662184  |
| N | 1.404154  | 1.971835  | 1.681008  |
| C | -1.249022 | -0.110661 | 0.403905  |
| C | -1.751092 | -1.014300 | 1.340075  |
| C | -1.954378 | 0.117585  | -0.789607 |
| C | -2.914460 | -1.729769 | 1.062952  |
| H | -1.231865 | -1.147317 | 2.284535  |
| C | -3.110929 | -0.601161 | -1.073525 |
| C | -3.580721 | -1.531964 | -0.147509 |
| H | -3.301397 | -2.435037 | 1.790348  |
| H | -3.629708 | -0.417316 | -2.008329 |
| H | -4.484073 | -2.091893 | -0.366755 |
| C | 1.472150  | -0.263622 | 0.293333  |
| C | 1.374548  | -1.629666 | 0.532883  |
| C | 2.462253  | 0.262391  | -0.530428 |
| C | 2.274455  | -2.489985 | -0.096771 |
| H | 0.621186  | -2.023817 | 1.204059  |
| C | 3.353895  | -0.608380 | -1.147625 |
| H | 2.542290  | 1.332917  | -0.688332 |
| C | 3.262435  | -1.987084 | -0.939853 |
| H | 2.201885  | -3.556726 | 0.088537  |
| H | 4.122640  | -0.203201 | -1.797642 |
| H | 3.961524  | -2.659431 | -1.425425 |
| O | -1.487103 | 1.015550  | -1.714493 |
| C | -0.985566 | 2.254371  | -1.186716 |
| H | -0.498185 | 2.750999  | -2.027007 |
| H | -1.833155 | 2.870479  | -0.857532 |
| C | -0.047036 | 1.986185  | -0.055152 |

|   |           |           |           |
|---|-----------|-----------|-----------|
| C | -0.133526 | 1.026239  | -0.454764 |
| N | 0.096485  | 1.774180  | -1.587443 |
| N | 1.024835  | 2.680999  | -1.316465 |
| C | 1.207318  | -0.068266 | -0.147616 |
| C | 1.929785  | -0.489499 | -1.263671 |
| C | 1.184783  | -0.837404 | 1.018867  |
| C | 2.571730  | -1.722052 | -1.215912 |
| H | 1.935316  | 0.117386  | -2.163488 |
| C | 1.807140  | -2.080561 | 1.062347  |
| C | 2.489242  | -2.521163 | -0.068748 |
| H | 3.112920  | -2.075116 | -2.086740 |
| H | 1.780144  | -2.660049 | 1.978426  |
| H | 2.980023  | -3.488503 | -0.050276 |
| C | -1.404893 | 0.261093  | -0.315858 |
| C | -1.644881 | -0.855004 | -1.121157 |
| C | -2.380836 | 0.694362  | 0.583631  |
| C | -2.856081 | -1.534924 | -1.025603 |
| H | -0.877150 | -1.188349 | -1.814640 |
| C | -3.590677 | 0.007547  | 0.683261  |
| H | -2.203183 | 1.574808  | 1.194660  |
| C | -3.828564 | -1.106742 | -0.119930 |
| H | -3.039915 | -2.401092 | -1.653033 |
| H | -4.346266 | 0.346253  | 1.384667  |
| H | -4.770200 | -1.640812 | -0.042065 |
| O | 0.591991  | -0.289661 | 2.111544  |
| C | 0.685678  | 1.140906  | 2.040964  |
| C | 0.744305  | 1.540082  | 0.593485  |
| C | 1.428061  | 2.594965  | -0.044753 |
| H | 2.205135  | 3.229642  | 0.357284  |
| H | -0.198805 | 1.549157  | 2.532381  |
| H | 1.585310  | 1.470237  | 2.570568  |

R1Ph\_R2Me\_XO:

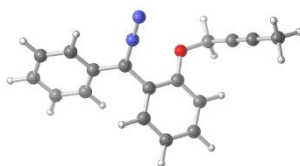

| FILE               | SCF E       | SCF+ZPVE    | H           | TS         | G            |
|--------------------|-------------|-------------|-------------|------------|--------------|
| A_Me_OPh_Ph_conf11 | -527444.458 | -527275.707 | -527263.782 | 42.9712156 | -527306.7531 |
| A_Me_OPh_Ph_conf5  | -527444.263 | -527275.601 | -527263.67  | 42.7051517 | -527306.3756 |
| A_Me_OPh_Ph_conf12 | -527444.263 | -527275.6   | -527263.67  | 42.6951115 | -527306.365  |
| A_Me_OPh_Ph        | -527443.795 | -527275.173 | -527263.181 | 42.8206134 | -527306.0015 |
| A_Me_OPh_Ph_conf4  | -527443.795 | -527275.171 | -527263.18  | 42.8042981 | -527305.9846 |
| A_Me_OPh_Ph_conf1  | -527443.134 | -527274.655 | -527262.63  | 43.1977465 | -527305.8281 |
| A_Me_OPh_Ph_conf9  | -527443.656 | -527274.959 | -527263.032 | 42.696994  | -527305.7287 |
| A_Me_OPh_Ph_conf6  | -527443.656 | -527274.959 | -527263.032 | 42.6863264 | -527305.718  |
| A_Me_OPh_Ph_conf7  | -527443.654 | -527274.961 | -527263.034 | 42.6838163 | -527305.7179 |
| A_Me_OPh_Ph_conf13 | -527443.654 | -527274.961 | -527263.034 | 42.6838163 | -527305.7179 |
| A_Me_OPh_Ph_conf2  | -527443.134 | -527274.635 | -527262.63  | 42.728997  | -527305.3588 |
| A_Me_OPh_Ph_conf3  | -527443.134 | -527274.635 | -527262.63  | 42.7271145 | -527305.3569 |
| A_Me_OPh_Ph_conf8  | -527443.133 | -527274.613 | -527262.624 | 42.4955635 | -527305.1196 |
| A_Me_OPh_Ph_conf16 | -527442.896 | -527274.406 | -527262.476 | 42.1422757 | -527304.6179 |
| A_Me_OPh_Ph_conf14 | -527441.363 | -527273.039 | -527260.991 | 43.5623295 | -527304.5537 |
| A_Me_OPh_Ph_conf10 | -527443.134 | -527274.673 | -527263.223 | 40.8998071 | -527304.1224 |
| A_Me_OPh_Ph_conf15 | -527441.362 | -527273.111 | -527261.587 | 42.060072  | -527303.6466 |
| B_Me_OPh_Ph        | -527491.186 | -527319.733 | -527309.392 | 37.7039018 | -527347.0957 |
| B_Me_OPh_Ph_conf2  | -527491.186 | -527319.733 | -527309.392 | 37.7039018 | -527347.0957 |
| B_Me_OPh_Ph_conf1  | -527491.186 | -527319.733 | -527309.392 | 37.7032743 | -527347.095  |
| C_Me_OPh_Ph_conf5  | -527503.031 | -527331.186 | -527320.997 | 37.0443894 | -527358.0417 |
| C_Me_OPh_Ph        | -527503.032 | -527331.186 | -527320.997 | 37.0425069 | -527358.0399 |
| C_Me_OPh_Ph_conf2  | -527503.032 | -527331.186 | -527320.997 | 37.0425069 | -527358.0399 |
| C_Me_OPh_Ph_conf1  | -527503.032 | -527331.187 | -527320.999 | 37.0412519 | -527358.0399 |
| C_Me_OPh_Ph_conf3  | -527502.746 | -527330.9   | -527320.727 | 37.047527  | -527357.7742 |
| C_Me_OPh_Ph_conf4  | -527502.746 | -527330.9   | -527320.727 | 37.0437619 | -527357.7704 |
| D_Me_OPh_Ph_conf1  | -527519.144 | -527346.759 | -527336.506 | 37.4792534 | -527373.9855 |
| D_Me_OPh_Ph_conf4  | -527519.144 | -527346.759 | -527336.506 | 37.4798809 | -527373.9862 |
| D_Me_OPh_Ph_conf2  | -527519.144 | -527346.758 | -527336.505 | 37.4817635 | -527373.9867 |
| D_Me_OPh_Ph        | -527519.144 | -527346.759 | -527336.506 | 37.4805085 | -527373.9868 |
| D_Me_OPh_Ph_conf3  | -527519.144 | -527346.759 | -527336.506 | 37.4805085 | -527373.9868 |
| E_Me_OPh_Ph        | -527502.99  | -527331.508 | -527321.093 | 37.9580431 | -527359.0511 |
| E_Me_OPh_Ph_conf2  | -527502.98  | -527331.49  | -527321.092 | 37.9448654 | -527359.0367 |
| E_Me_OPh_Ph_conf1  | -527502.98  | -527331.489 | -527321.092 | 37.9448654 | -527359.0367 |
| TS_A_B_Me_OPh_Ph   | -527421.825 | -527253.251 | -527242.276 | 39.1760388 | -527281.4519 |

|                  |             |             |             |            |              |
|------------------|-------------|-------------|-------------|------------|--------------|
| TS_B_C_Me_OPh_Ph | -527461.376 | -527290.983 | -527280.969 | 36.4444905 | -527317.4132 |
| TS_B_D_Me_OPh_Ph | -527458.818 | -527288.748 | -527278.587 | 37.0098764 | -527315.597  |
| TS_B_E_Me_OPh_Ph | -527464.772 | -527294.641 | -527284.47  | 37.5225516 | -527321.9927 |

A\_R1Ph\_R2Me\_XO\_conf11  
SCF Energy: -840.536356097  
Num. Imaginary Frequencies: 0

|   |           |           |           |
|---|-----------|-----------|-----------|
| C | -1.014658 | -0.443794 | -0.299122 |
| N | -0.513325 | -1.620271 | -0.561376 |
| N | -0.081492 | -2.647380 | -0.781247 |
| C | -0.080921 | 0.700623  | -0.271148 |
| C | -0.429014 | 1.908877  | -0.883784 |
| C | 1.172122  | 0.606329  | 0.369532  |
| C | 0.429717  | 3.004819  | -0.861808 |
| H | -1.390181 | 1.980069  | -1.384767 |
| C | 2.047147  | 1.694451  | 0.373430  |
| C | 1.668528  | 2.890588  | -0.235961 |
| H | 0.137717  | 3.932733  | -1.341496 |
| H | 3.020681  | 1.619876  | 0.842655  |
| H | 2.354548  | 3.731340  | -0.221036 |
| C | -2.471442 | -0.369254 | -0.100022 |
| C | -3.324276 | -1.385947 | -0.560445 |
| C | -3.035810 | 0.721967  | 0.580503  |
| C | -4.697119 | -1.313839 | -0.342093 |
| H | -2.915470 | -2.236184 | -1.099664 |
| C | -4.410680 | 0.791813  | 0.787187  |
| H | -2.393455 | 1.511516  | 0.957375  |
| C | -5.250828 | -0.223598 | 0.329164  |
| H | -5.336710 | -2.111352 | -0.707421 |
| H | -4.825490 | 1.643305  | 1.317858  |
| H | -6.321769 | -0.166265 | 0.493482  |
| O | 1.434425  | -0.588001 | 0.973150  |
| C | 2.675366  | -0.755038 | 1.649330  |
| H | 2.827078  | 0.062102  | 2.364493  |
| H | 2.561159  | -1.681760 | 2.214130  |
| C | 3.815945  | -0.861653 | 0.729064  |
| C | 4.753647  | -0.959162 | -0.028156 |
| C | 5.887488  | -1.073585 | -0.946496 |
| H | 5.799839  | -1.974259 | -1.558390 |
| H | 5.933768  | -0.207335 | -1.610650 |
| H | 6.825333  | -1.127810 | -0.388454 |

B\_R1Ph\_R2Me\_XO  
SCF Energy: -840.610823104  
Num. Imaginary Frequencies: 0

|   |           |           |           |
|---|-----------|-----------|-----------|
| C | -0.154610 | 0.336898  | -0.447467 |
| N | -0.347104 | 0.994975  | -1.767962 |
| N | -0.397102 | 2.232758  | -1.620529 |
| C | 1.169631  | -0.395467 | -0.390045 |
| C | 1.598622  | -1.221375 | -1.433867 |
| C | 1.969531  | -0.264564 | 0.755620  |
| C | 2.803351  | -1.909323 | -1.352544 |
| H | 0.965833  | -1.316374 | -2.311437 |
| C | 3.180595  | -0.961117 | 0.841556  |
| C | 3.591628  | -1.775089 | -0.205637 |
| H | 3.125004  | -2.544589 | -2.170485 |
| H | 3.781847  | -0.844715 | 1.737052  |
| H | 4.533639  | -2.308406 | -0.126534 |
| C | -1.373959 | -0.544812 | -0.154940 |

|   |           |           |           |
|---|-----------|-----------|-----------|
| C | -1.242264 | -1.851560 | 0.313860  |
| C | -2.653401 | 0.000184  | -0.316400 |
| C | -2.378289 | -2.607635 | 0.614825  |
| H | -0.256732 | -2.287014 | 0.444970  |
| C | -3.783613 | -0.754527 | -0.020586 |
| H | -2.764902 | 1.020161  | -0.676243 |
| C | -3.648384 | -2.063998 | 0.447096  |
| H | -2.262931 | -3.623533 | 0.979066  |
| H | -4.770039 | -0.322241 | -0.154994 |
| H | -4.529742 | -2.653647 | 0.678192  |
| O | 1.664811  | 0.521066  | 1.829627  |
| C | 0.399477  | 1.206875  | 1.869276  |
| H | -0.323757 | 0.562238  | 2.384687  |
| H | 0.564082  | 2.107834  | 2.460427  |
| C | -0.049769 | 1.496246  | 0.487039  |
| C | -0.203408 | 2.610694  | -0.237279 |
| C | -0.171025 | 4.057390  | 0.107821  |
| H | 0.042251  | 4.200340  | 1.168280  |
| H | 0.595305  | 4.569990  | -0.480067 |
| H | -1.133587 | 4.524369  | -0.120455 |

C\_R1Ph\_R2Me\_XO\_conf5  
SCF Energy: -840.629699660  
Num. Imaginary Frequencies: 0

|   |           |           |           |
|---|-----------|-----------|-----------|
| C | 0.473305  | 1.164316  | -0.511369 |
| N | 0.243648  | 2.227303  | -1.197765 |
| N | -1.034473 | 2.740728  | -0.806479 |
| C | 1.709353  | 0.402475  | -0.406454 |
| C | 2.670313  | 0.305835  | -1.420101 |
| C | 1.923624  | -0.254240 | 0.819395  |
| C | 3.817946  | -0.450707 | -1.228379 |
| H | 2.487845  | 0.819655  | -2.358858 |
| C | 3.076786  | -1.016080 | 1.013201  |
| C | 4.012366  | -1.113144 | -0.010231 |
| H | 4.556412  | -0.531996 | -2.018181 |
| H | 3.224161  | -1.512609 | 1.966226  |
| H | 4.907238  | -1.707345 | 0.144888  |
| C | -1.351469 | -0.478879 | 0.053418  |
| C | -1.845397 | -0.609988 | -1.250498 |
| C | -1.538778 | -1.524517 | 0.958772  |
| C | -2.520005 | -1.762274 | -1.641088 |
| H | -1.703371 | 0.199869  | -1.963425 |
| C | -2.216442 | -2.681004 | 0.565937  |
| H | -1.149030 | -1.459680 | 1.968654  |
| C | -2.708708 | -2.803627 | -0.730462 |
| H | -2.897550 | -1.847206 | -2.654999 |
| H | -2.353212 | -3.486954 | 1.279873  |
| H | -3.234006 | -3.704018 | -1.032295 |
| O | 1.042981  | -0.185420 | 1.860654  |
| C | 0.017244  | 0.808838  | 1.812997  |
| H | -0.684502 | 0.555417  | 2.609350  |
| H | 0.453092  | 1.793420  | 2.023938  |
| C | -0.643437 | 0.822273  | 0.433264  |
| C | -1.523011 | 2.016226  | 0.139042  |
| C | -2.837515 | 2.274101  | 0.787334  |
| H | -2.711865 | 2.407985  | 1.866797  |

|   |           |          |          |
|---|-----------|----------|----------|
| H | -3.298986 | 3.167063 | 0.365164 |
| H | -3.501352 | 1.415920 | 0.638675 |

D\_R1Ph\_R2Me\_XO\_conf1  
SCF Energy: -840.655376852  
Num. Imaginary Frequencies: 0

|   |           |           |           |
|---|-----------|-----------|-----------|
| C | 0.529267  | 0.533949  | -0.077978 |
| N | -0.757476 | 0.977428  | -0.061880 |
| N | -0.811714 | 2.330397  | -0.025941 |
| C | 1.104814  | -0.804917 | -0.168793 |
| C | 0.458573  | -1.974053 | -0.585604 |
| C | 2.474012  | -0.867688 | 0.169480  |
| C | 1.140165  | -3.187674 | -0.613825 |
| H | -0.582760 | -1.932552 | -0.887085 |
| C | 3.151041  | -2.084267 | 0.155999  |
| C | 2.481089  | -3.242972 | -0.230037 |
| H | 0.625988  | -4.086595 | -0.936324 |
| H | 4.198006  | -2.101842 | 0.439863  |
| H | 3.013689  | -4.188387 | -0.245787 |
| C | -1.964841 | 0.230242  | 0.045614  |
| C | -2.086652 | -0.746357 | 1.033259  |
| C | -3.016381 | 0.507418  | -0.825692 |
| C | -3.271205 | -1.473161 | 1.129222  |
| H | -1.260902 | -0.931206 | 1.713596  |
| C | -4.203124 | -0.213422 | -0.710296 |
| H | -2.894498 | 1.279228  | -1.578190 |
| C | -4.330201 | -1.207921 | 0.260257  |
| H | -3.369822 | -2.237793 | 1.892756  |
| H | -5.026145 | -0.002225 | -1.385156 |
| H | -5.253851 | -1.771388 | 0.342544  |
| O | 3.165744  | 0.239928  | 0.580563  |
| C | 2.815669  | 1.481953  | -0.052932 |
| H | 3.334879  | 2.257017  | 0.512655  |
| H | 3.210985  | 1.472057  | -1.078799 |
| C | 1.333008  | 1.651920  | -0.031193 |
| C | 0.450197  | 2.753333  | -0.009363 |
| C | 0.779461  | 4.211766  | 0.024858  |
| H | 1.290620  | 4.520813  | -0.891541 |
| H | -0.135370 | 4.797950  | 0.126642  |
| H | 1.438200  | 4.441817  | 0.867216  |

E\_R1Ph\_R2Me\_XO  
SCF Energy: -840.629634360  
Num. Imaginary Frequencies: 0

|   |           |           |           |
|---|-----------|-----------|-----------|
| C | -0.718040 | 1.214992  | -0.121919 |
| N | -0.743863 | 2.388582  | -0.654191 |
| N | 0.544022  | 2.987212  | -0.560676 |
| C | 1.320136  | -0.310861 | -0.269115 |
| C | 1.612494  | -0.551626 | -1.603679 |
| C | 1.630242  | -1.250838 | 0.707768  |
| C | 2.227843  | -1.760988 | -1.939683 |
| H | 1.366607  | 0.182383  | -2.366677 |
| C | 2.240006  | -2.458995 | 0.398047  |
| C | 2.534652  | -2.696458 | -0.947159 |
| H | 2.467775  | -1.974376 | -2.975477 |
| H | 2.472519  | -3.181270 | 1.172353  |
| H | 3.013263  | -3.630381 | -1.223916 |
| C | -1.904516 | 0.345324  | -0.066572 |
| C | -1.849011 | -0.926281 | 0.518749  |

|   |           |           |           |
|---|-----------|-----------|-----------|
| C | -3.119368 | 0.797673  | -0.605649 |
| C | -2.987249 | -1.730401 | 0.563604  |
| H | -0.924513 | -1.302537 | 0.944421  |
| C | -4.250687 | -0.007466 | -0.560210 |
| H | -3.159935 | 1.783098  | -1.057180 |
| C | -4.188258 | -1.275120 | 0.024747  |
| H | -2.930946 | -2.713175 | 1.020058  |
| H | -5.184304 | 0.351939  | -0.980890 |
| H | -5.073114 | -1.902635 | 0.059485  |
| O | 1.242326  | -0.876275 | 1.958243  |
| C | 0.768517  | 0.483169  | 1.903709  |
| H | -0.194455 | 0.530162  | 2.414743  |
| H | 1.489502  | 1.113723  | 2.429462  |
| C | 0.664397  | 0.882551  | 0.401036  |
| C | 1.345700  | 2.181569  | 0.038039  |
| C | 2.783619  | 2.477398  | 0.284265  |
| H | 3.411009  | 1.709981  | -0.180578 |
| H | 3.037712  | 3.453419  | -0.129637 |
| H | 3.006290  | 2.477451  | 1.356073  |

R1Ph\_R2Ph\_XO:

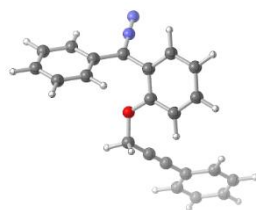

| FILE                  | SCF E       | SCF+ZPVE    | H           | TS         | G            |
|-----------------------|-------------|-------------|-------------|------------|--------------|
| A_R1Ph_R2Ph_XO_conf8  | -647720.249 | -647720.249 | -647720.249 | 47.0349665 | -647767.2836 |
| A_R1Ph_R2Ph_XO_conf6  | -647721.165 | -647518.594 | -647504.954 | 47.5156386 | -647552.4695 |
| A_R1Ph_R2Ph_XO_conf13 | -647720.248 | -647517.758 | -647504.019 | 48.2102915 | -647552.2291 |
| A_R1Ph_R2Ph_XO_conf10 | -647720.249 | -647517.712 | -647504.025 | 48.0483941 | -647552.073  |
| A_R1Ph_R2Ph_XO_conf9  | -647720.312 | -647517.752 | -647504.035 | 47.9687004 | -647552.0041 |
| A_R1Ph_R2Ph_XO        | -647720.304 | -647517.781 | -647504.055 | 47.9392075 | -647551.9942 |
| A_R1Ph_R2Ph_XO_conf2  | -647720.304 | -647517.781 | -647504.055 | 47.9354424 | -647551.9904 |
| A_R1Ph_R2Ph_XO_conf1  | -647720.312 | -647517.752 | -647504.035 | 47.9417175 | -647551.9772 |
| A_R1Ph_R2Ph_XO_conf4  | -647720.246 | -647517.686 | -647504.009 | 47.8620238 | -647551.8706 |
| A_R1Ph_R2Ph_XO_conf11 | -647720.082 | -647517.855 | -647504.14  | 47.038104  | -647551.1779 |
| A_R1Ph_R2Ph_XO_conf3  | -647720.24  | -647517.8   | -647504.098 | 47.0362215 | -647551.1345 |
| A_R1Ph_R2Ph_XO_conf7  | -647720.24  | -647517.8   | -647504.098 | 47.0349665 | -647551.1332 |
| A_R1Ph_R2Ph_XO_conf12 | -647720.24  | -647517.799 | -647504.098 | 47.0318289 | -647551.1301 |
| A_R1Ph_R2Ph_XO_conf15 | -647719.512 | -647517.374 | -647503.639 | 47.4190022 | -647551.0583 |
| A_R1Ph_R2Ph_XO_conf5  | -647720.246 | -647517.84  | -647504.149 | 46.8843642 | -647551.0333 |
| A_R1Ph_R2Ph_XO_conf14 | -647720.019 | -647517.63  | -647503.933 | 47.0261813 | -647550.9594 |
| B_R1Ph_R2Ph_XO_conf2  | -647768.12  | -647563.068 | -647550.823 | 42.7660201 | -647593.5893 |
| B_R1Ph_R2Ph_XO        | -647768.12  | -647563.068 | -647550.823 | 42.764765  | -647593.5881 |
| B_R1Ph_R2Ph_XO_conf1  | -647766.772 | -647561.519 | -647549.328 | 42.6028676 | -647591.9313 |
| C_R1Ph_R2Ph_XO_conf2  | -647780.126 | -647574.456 | -647562.389 | 41.7005091 | -647604.0893 |
| C_R1Ph_R2Ph_XO_conf1  | -647780.126 | -647574.456 | -647562.389 | 41.6992541 | -647604.0881 |
| C_R1Ph_R2Ph_XO        | -647780.126 | -647574.456 | -647562.389 | 41.6992541 | -647604.0881 |
| C_R1Ph_R2Ph_XO_conf4  | -647780.126 | -647574.456 | -647562.389 | 41.6986266 | -647604.0881 |
| C_R1Ph_R2Ph_XO_conf3  | -647780.126 | -647574.456 | -647562.389 | 41.6992541 | -647604.0881 |
| D_R1Ph_R2Ph_XO_conf2  | -647796.682 | -647590.578 | -647578.463 | 42.1792988 | -647620.6421 |
| D_R1Ph_R2Ph_XO        | -647796.682 | -647590.577 | -647578.463 | 42.1774163 | -647620.6408 |
| D_R1Ph_R2Ph_XO_conf4  | -647796.682 | -647590.577 | -647578.463 | 42.1767887 | -647620.6402 |
| D_R1Ph_R2Ph_XO_conf3  | -647796.682 | -647590.576 | -647578.463 | 42.1730237 | -647620.6357 |
| D_R1Ph_R2Ph_XO_conf1  | -647795.6   | -647589.461 | -647577.331 | 42.2909955 | -647619.6224 |
| E_R1Ph_R2Ph_XO_conf4  | -647779.843 | -647574.45  | -647562.184 | 42.7798253 | -647604.9642 |
| E_R1Ph_R2Ph_XO        | -647779.843 | -647574.45  | -647562.184 | 42.7766877 | -647604.961  |
| E_R1Ph_R2Ph_XO_conf2  | -647779.843 | -647574.45  | -647562.185 | 42.7754327 | -647604.9603 |
| E_R1Ph_R2Ph_XO_conf3  | -647779.843 | -647574.45  | -647562.184 | 42.7748052 | -647604.9591 |
| E_R1Ph_R2Ph_XO_conf1  | -647779.843 | -647574.45  | -647562.186 | 42.7697851 | -647604.9553 |
| TS_A_B_R1Ph_R2Ph_XO   | -647699.862 | -647497.715 | -647484.81  | 44.6441557 | -647529.4541 |

|                     |             |             |             |            |              |
|---------------------|-------------|-------------|-------------|------------|--------------|
| TS_B_C_R1Ph_R2Ph_XO | -647740.471 | -647536.398 | -647524.488 | 41.25686   | -647565.7444 |
| TS_B_D_R1Ph_R2Ph_XO | -647736.171 | -647532.233 | -647520.285 | 41.4746057 | -647561.7596 |
| TS_B_E_R1Ph_R2Ph_XO | -647742.169 | -647538.256 | -647526.244 | 42.062582  | -647568.3066 |

|                               |           |           |           |   |           |           |           |
|-------------------------------|-----------|-----------|-----------|---|-----------|-----------|-----------|
| A_R1Ph_R2Ph_XO_conf8          |           |           |           | H | -2.094550 | 1.490884  | 2.402597  |
| SCF Energy: -1032.20805491    |           |           |           | C | -2.171983 | 2.926564  | -1.204304 |
| Num. Imaginary Frequencies: 0 |           |           |           | C | -2.813824 | 3.601201  | -0.168255 |
|                               |           |           |           | H | -3.281445 | 3.629764  | 1.937012  |
| C                             | 2.558949  | 0.617442  | 0.897317  | H | -2.179604 | 3.306086  | -2.220523 |
| N                             | 2.681471  | 0.913901  | 2.160806  | H | -3.335544 | 4.529012  | -0.380005 |
| N                             | 2.800472  | 1.156308  | 3.266087  | C | -1.645962 | -1.334550 | 0.240947  |
| C                             | 1.623271  | 1.458594  | 0.114549  | C | -1.051030 | -2.601177 | 0.251993  |
| C                             | 1.723813  | 2.851249  | 0.133946  | C | -3.008271 | -1.217945 | -0.029868 |
| C                             | 0.602646  | 0.862235  | -0.654810 | C | -1.811534 | -3.737616 | -0.003673 |
| C                             | 0.843608  | 3.651214  | -0.593185 | H | 0.011611  | -2.696942 | 0.463778  |
| H                             | 2.515050  | 3.307738  | 0.722633  | C | -3.770057 | -2.359347 | -0.290788 |
| C                             | -0.267133 | 1.656674  | -1.403738 | H | -3.480192 | -0.240418 | -0.040544 |
| C                             | -0.141851 | 3.046691  | -1.367065 | C | -3.175954 | -3.618343 | -0.277975 |
| H                             | 0.937629  | 4.731176  | -0.563672 | H | -1.340856 | -4.715459 | 0.010163  |
| H                             | -1.060664 | 1.210080  | -1.990822 | H | -4.829599 | -2.258281 | -0.503184 |
| H                             | -0.830176 | 3.652648  | -1.947500 | H | -3.769965 | -4.503869 | -0.480190 |
| C                             | 3.419193  | -0.447148 | 0.362790  | O | -0.942318 | 1.059424  | -1.983007 |
| C                             | 4.134340  | -1.311648 | 1.206963  | C | 0.278650  | 0.336089  | -1.763149 |
| C                             | 3.553604  | -0.600006 | -1.026055 | H | 0.213388  | -0.551330 | -2.401258 |
| C                             | 4.960441  | -2.297702 | 0.674544  | H | 1.118930  | 0.953049  | -2.103128 |
| H                             | 4.042491  | -1.221009 | 2.285930  | C | 0.443680  | -0.029722 | -0.332149 |
| C                             | 4.377369  | -1.591017 | -1.551172 | C | 1.511411  | -0.148119 | 0.475778  |
| H                             | 3.011261  | 0.062815  | -1.693650 | C | 2.949156  | -0.105329 | 0.199538  |
| C                             | 5.086840  | -2.446099 | -0.706723 | C | 3.440775  | -0.457737 | -1.065177 |
| H                             | 5.503808  | -2.955805 | 1.345546  | C | 3.848561  | 0.301214  | 1.195705  |
| H                             | 4.467897  | -1.691965 | -2.628440 | C | 4.804899  | -0.383013 | -1.335833 |
| H                             | 5.729218  | -3.217024 | -1.119405 | H | 2.759998  | -0.819688 | -1.830521 |
| O                             | 0.542817  | -0.496781 | -0.599928 | C | 5.211608  | 0.369767  | 0.922193  |
| C                             | -0.397649 | -1.171538 | -1.424562 | H | 3.471228  | 0.566722  | 2.177752  |
| H                             | -0.314255 | -0.820558 | -2.460198 | C | 5.693009  | 0.032712  | -0.343888 |
| H                             | -0.097484 | -2.220345 | -1.396084 | H | 5.174693  | -0.661136 | -2.317451 |
| C                             | -1.778785 | -1.034794 | -0.942182 | H | 5.899931  | 0.688885  | 1.698230  |
| C                             | -2.914447 | -0.921538 | -0.538340 | H | 6.756394  | 0.086553  | -0.553940 |
| C                             | -4.262668 | -0.772660 | -0.063874 |   |           |           |           |
| C                             | -4.865950 | 0.494300  | -0.048541 |   |           |           |           |
| C                             | -4.982891 | -1.888905 | 0.387410  |   |           |           |           |
| C                             | -6.170944 | 0.638702  | 0.413014  |   |           |           |           |
| H                             | -4.304561 | 1.355414  | -0.397068 |   |           |           |           |
| C                             | -6.288654 | -1.736453 | 0.844635  |   |           |           |           |
| H                             | -4.512781 | -2.866885 | 0.376245  |   |           |           |           |
| C                             | -6.884504 | -0.474617 | 0.859108  | C | -1.041842 | -1.073822 | -0.677292 |
| H                             | -6.631634 | 1.621184  | 0.424110  | N | -0.537781 | -1.905392 | -1.521121 |
| H                             | -6.841216 | -2.603525 | 1.191734  | N | 0.874980  | -1.872304 | -1.386380 |
| H                             | -7.902297 | -0.358998 | 1.217652  | C | -2.436696 | -0.904284 | -0.305062 |
|                               |           |           |           | C | -3.520691 | -1.148124 | -1.157524 |
|                               |           |           |           | C | -2.671657 | -0.487483 | 1.017420  |
|                               |           |           |           | C | -4.820058 | -0.958451 | -0.709326 |
|                               |           |           |           | H | -3.319371 | -1.470120 | -2.174472 |
|                               |           |           |           | C | -3.978110 | -0.295723 | 1.469615  |
|                               |           |           |           | C | -5.041139 | -0.527546 | 0.604733  |
|                               |           |           |           | H | -5.658204 | -1.138434 | -1.373248 |
|                               |           |           |           | H | -4.138226 | 0.023424  | 2.493802  |
|                               |           |           |           | H | -6.055441 | -0.376847 | 0.960231  |
|                               |           |           |           | C | 0.013026  | 1.147836  | -0.196285 |
|                               |           |           |           | C | -0.233888 | 2.127952  | 0.767299  |
|                               |           |           |           | C | 0.283508  | 1.539312  | -1.512758 |
|                               |           |           |           | C | -0.197173 | 3.479620  | 0.419091  |
|                               |           |           |           | H | -0.464398 | 1.852114  | 1.790763  |
| B_R1Ph_R2Ph_XO_conf2          |           |           |           |   |           |           |           |
| SCF Energy: -1032.28434239    |           |           |           |   |           |           |           |
| Num. Imaginary Frequencies: 0 |           |           |           |   |           |           |           |
| C                             | -0.770928 | -0.111402 | 0.537578  |   |           |           |           |
| N                             | -0.197174 | -0.250510 | 1.899374  |   |           |           |           |
| N                             | 1.047886  | -0.286786 | 1.835735  |   |           |           |           |
| C                             | -1.480292 | 1.213039  | 0.368050  |   |           |           |           |
| C                             | -2.115603 | 1.903729  | 1.399192  |   |           |           |           |
| C                             | -1.501296 | 1.735603  | -0.932808 |   |           |           |           |
| C                             | -2.783492 | 3.098024  | 1.133477  |   |           |           |           |

|   |           |           |           |
|---|-----------|-----------|-----------|
| C | 0.317943  | 2.886614  | -1.858728 |
| H | 0.474803  | 0.783365  | -2.271635 |
| C | 0.079270  | 3.863254  | -0.890584 |
| H | -0.389243 | 4.230646  | 1.178702  |
| H | 0.532943  | 3.173038  | -2.883149 |
| H | 0.107188  | 4.914761  | -1.157414 |
| O | -1.665574 | -0.256573 | 1.909501  |
| C | -0.343499 | -0.691261 | 1.583095  |
| H | 0.315755  | -0.192949 | 2.296443  |
| H | -0.269480 | -1.775679 | 1.731512  |
| C | 0.000037  | -0.348254 | 0.129613  |
| C | 1.211402  | -1.061485 | -0.437193 |
| C | 2.608506  | -0.848409 | -0.034976 |
| C | 3.618691  | -1.670898 | -0.558381 |
| C | 2.949265  | 0.160313  | 0.875488  |
| C | 4.940997  | -1.484124 | -0.175481 |
| H | 3.350527  | -2.454960 | -1.258438 |
| C | 4.277374  | 0.344060  | 1.256881  |
| H | 2.184758  | 0.818974  | 1.275528  |
| C | 5.274556  | -0.476128 | 0.733547  |
| H | 5.715196  | -2.126212 | -0.582929 |
| H | 4.530078  | 1.130645  | 1.960254  |
| H | 6.308371  | -0.333115 | 1.031391  |

D\_R1Ph\_R2Ph\_XO\_conf2  
 SCF Energy: -1032.32985879  
 Num. Imaginary Frequencies: 0

|   |           |           |           |
|---|-----------|-----------|-----------|
| C | 0.485274  | 0.455703  | 0.090059  |
| N | 0.385501  | -0.901875 | 0.091522  |
| N | -0.900068 | -1.305024 | 0.078365  |
| C | 1.638924  | 1.348819  | 0.138934  |
| C | 2.935153  | 1.029910  | 0.558365  |
| C | 1.354152  | 2.675710  | -0.246400 |
| C | 3.938926  | 1.994373  | 0.543973  |
| H | 3.158002  | 0.023360  | 0.896242  |
| C | 2.361286  | 3.636407  | -0.275171 |
| C | 3.653340  | 3.291647  | 0.114812  |
| H | 4.940393  | 1.733913  | 0.868901  |
| H | 2.114219  | 4.643072  | -0.595298 |
| H | 4.435427  | 4.043781  | 0.097380  |
| C | 1.423065  | -1.876342 | 0.007474  |
| C | 1.447000  | -2.925887 | 0.922873  |
| C | 2.378932  | -1.774779 | -1.001808 |
| C | 2.454619  | -3.883789 | 0.829602  |
| H | 0.683323  | -2.980720 | 1.691343  |
| C | 3.390861  | -2.729031 | -1.076422 |
| H | 2.327128  | -0.957017 | -1.714073 |
| C | 3.429739  | -3.783533 | -0.163388 |
| H | 2.480708  | -4.704870 | 1.538387  |
| H | 4.141121  | -2.654135 | -1.856603 |
| H | 4.216062  | -4.528383 | -0.228560 |
| O | 0.105332  | 3.047379  | -0.665840 |
| C | -1.006834 | 2.428157  | -0.000721 |
| H | -1.098941 | 2.865086  | 1.004482  |
| H | -1.885950 | 2.704942  | -0.584868 |
| C | -0.801630 | 0.948412  | 0.051373  |
| C | -1.636621 | -0.192604 | 0.055447  |
| C | -3.107805 | -0.257285 | 0.026511  |
| C | -3.760437 | -1.365962 | -0.528788 |
| C | -3.872990 | 0.790630  | 0.552308  |
| C | -5.150914 | -1.420585 | -0.559333 |

|   |           |           |           |
|---|-----------|-----------|-----------|
| H | -3.167323 | -2.176451 | -0.940386 |
| C | -5.265492 | 0.737013  | 0.515004  |
| H | -3.381497 | 1.641137  | 1.016802  |
| C | -5.908291 | -0.367951 | -0.041434 |
| H | -5.645746 | -2.283283 | -0.994428 |
| H | -5.846718 | 1.555044  | 0.928677  |
| H | -6.992427 | -0.410416 | -0.070107 |

E\_R1Ph\_R2Ph\_XO\_conf4  
 SCF Energy: -1032.30302537  
 Num. Imaginary Frequencies: 0

|   |           |           |           |
|---|-----------|-----------|-----------|
| C | 1.143013  | -1.247276 | -0.133246 |
| N | 0.705667  | -2.330191 | -0.681914 |
| N | -0.705594 | -2.330200 | -0.681925 |
| C | 0.000049  | 0.999231  | -0.401046 |
| C | -0.000002 | 1.321623  | -1.749355 |
| C | -0.000104 | 1.995187  | 0.569397  |
| C | -0.000081 | 2.673501  | -2.106880 |
| H | 0.000078  | 0.542013  | -2.506454 |
| C | -0.000047 | 3.342858  | 0.239373  |
| C | -0.000067 | 3.664159  | -1.121325 |
| H | -0.000140 | 2.953763  | -3.154386 |
| H | -0.000016 | 4.106017  | 1.009370  |
| H | -0.000080 | 4.709013  | -1.414655 |
| C | 2.579432  | -0.964550 | 0.015068  |
| C | 3.514736  | -1.925050 | -0.403445 |
| C | 3.039594  | 0.237555  | 0.569855  |
| C | 4.876454  | -1.684468 | -0.271291 |
| H | 3.157570  | -2.855967 | -0.830421 |
| C | 4.407048  | 0.474210  | 0.701597  |
| H | 2.343265  | 1.001690  | 0.898873  |
| C | 5.327685  | -0.483213 | 0.281925  |
| H | 5.589479  | -2.434146 | -0.598815 |
| H | 4.749028  | 1.409676  | 1.131999  |
| H | 6.391933  | -0.297021 | 0.384906  |
| O | -0.000159 | 1.509506  | 1.842570  |
| C | 0.000054  | 0.067979  | 1.797865  |
| H | 0.890871  | -0.290534 | 2.317524  |
| H | -0.890545 | -0.290790 | 2.317711  |
| C | 0.000003  | -0.350375 | 0.294980  |
| C | -1.142986 | -1.247302 | -0.133250 |
| C | -2.579402 | -0.964611 | 0.015035  |
| C | -3.039542 | 0.237337  | 0.570176  |
| C | -3.514719 | -1.924968 | -0.403778 |
| C | -4.406987 | 0.474002  | 0.701955  |
| H | -2.343174 | 1.001300  | 0.899508  |
| C | -4.876430 | -1.684377 | -0.271589 |
| H | -3.157570 | -2.855778 | -0.831004 |
| C | -5.327638 | -0.483265 | 0.281961  |
| H | -4.748949 | 1.409340  | 1.132649  |
| H | -5.589474 | -2.433938 | -0.599339 |
| H | -6.391884 | -0.297075 | 0.384970  |

TS\_A\_B\_R1Ph\_R2Ph\_XO  
 SCF Energy: -1032.17556649  
 Num. Imaginary Frequencies: 1  
 Imaginary Frequency: -468.6440

|   |           |           |           |
|---|-----------|-----------|-----------|
| C | -0.953387 | 0.111630  | -0.574307 |
| N | -0.096074 | -0.084374 | -1.597410 |

|   |           |           |           |
|---|-----------|-----------|-----------|
| N | 1.005702  | -0.252366 | -1.871892 |
| C | -1.939395 | -0.993544 | -0.365183 |
| C | -2.828477 | -1.329762 | -1.398428 |
| C | -2.009232 | -1.708468 | 0.841309  |
| C | -3.748716 | -2.359875 | -1.263865 |
| H | -2.777046 | -0.759748 | -2.322212 |
| C | -2.945387 | -2.742696 | 0.980143  |
| C | -3.802495 | -3.068037 | -0.060094 |
| H | -4.417049 | -2.605385 | -2.081728 |
| H | -2.971348 | -3.280624 | 1.921991  |
| H | -4.516979 | -3.874673 | 0.069229  |
| C | -1.355624 | 1.529021  | -0.362476 |
| C | -2.598590 | 1.828976  | 0.207523  |
| C | -0.466935 | 2.575046  | -0.656074 |
| C | -2.946347 | 3.152100  | 0.480013  |
| H | -3.294696 | 1.027975  | 0.437697  |
| C | -0.822829 | 3.892461  | -0.391729 |
| H | 0.506109  | 2.356727  | -1.087889 |
| C | -2.063744 | 4.186839  | 0.179391  |
| H | -3.912894 | 3.370271  | 0.922810  |
| H | -0.128380 | 4.692531  | -0.627236 |
| H | -2.337544 | 5.216191  | 0.386724  |
| O | -1.220383 | -1.516540 | 1.933317  |
| C | -0.370627 | -0.370529 | 2.030303  |
| H | -0.987078 | 0.533846  | 2.107059  |
| H | 0.164715  | -0.511344 | 2.970537  |
| C | 0.574305  | -0.267636 | 0.900966  |
| C | 1.688796  | -0.318603 | 0.357689  |
| C | 3.117397  | -0.361357 | 0.178370  |
| C | 3.720975  | -1.351309 | -0.614028 |
| C | 3.930229  | 0.595797  | 0.808632  |
| C | 5.104867  | -1.392420 | -0.753801 |
| H | 3.095514  | -2.082293 | -1.116903 |
| C | 5.313364  | 0.557935  | 0.650165  |
| H | 3.467719  | 1.365397  | 1.418911  |
| C | 5.907160  | -0.437301 | -0.126571 |
| H | 5.558508  | -2.168325 | -1.362668 |
| H | 5.928792  | 1.306402  | 1.139737  |
| H | 6.985483  | -0.467063 | -0.245166 |

TS\_B\_C\_R1Ph\_R2Ph\_XO  
 SCF Energy: -1032.24028174  
 Num. Imaginary Frequencies: 1  
 Imaginary Frequency: -548.2544

|   |           |           |           |
|---|-----------|-----------|-----------|
| C | 0.871410  | -0.294067 | 0.835002  |
| N | 0.330106  | -0.405500 | 2.093081  |
| N | -0.975615 | -0.536419 | 1.956351  |
| C | 2.232729  | -0.714912 | 0.479724  |
| C | 3.351847  | -0.488384 | 1.282479  |
| C | 2.369261  | -1.409293 | -0.732950 |
| C | 4.599944  | -0.961017 | 0.894335  |
| H | 3.224705  | 0.055654  | 2.213623  |
| C | 3.622291  | -1.885416 | -1.123933 |
| C | 4.727401  | -1.660970 | -0.309887 |
| H | 5.467724  | -0.787384 | 1.520958  |
| H | 3.708360  | -2.425790 | -2.060520 |
| H | 5.698749  | -2.032262 | -0.620548 |
| C | 0.482654  | 1.315516  | 0.126016  |
| C | 1.389760  | 1.783579  | -0.822570 |
| C | -0.345238 | 2.207274  | 0.815309  |
| C | 1.471599  | 3.153681  | -1.081028 |

|   |           |           |           |
|---|-----------|-----------|-----------|
| H | 2.053309  | 1.106520  | -1.350957 |
| C | -0.246846 | 3.566704  | 0.557695  |
| H | -1.061596 | 1.844307  | 1.546127  |
| C | 0.659032  | 4.048065  | -0.394158 |
| H | 2.183323  | 3.509761  | -1.818320 |
| H | -0.889763 | 4.254417  | 1.096902  |
| H | 0.724099  | 5.111993  | -0.595267 |
| O | 1.312999  | -1.706151 | -1.550488 |
| C | 0.127602  | -0.897479 | -1.533731 |
| H | 0.247989  | -0.074652 | -2.245486 |
| H | -0.675369 | -1.549497 | -1.882648 |
| C | -0.186099 | -0.418565 | -0.146310 |
| C | -1.340112 | -0.577080 | 0.656860  |
| C | -2.735437 | -0.650602 | 0.225456  |
| C | -3.713898 | -1.218264 | 1.055436  |
| C | -3.111739 | -0.141902 | -1.025506 |
| C | -5.037769 | -1.281476 | 0.634348  |
| H | -3.422452 | -1.611777 | 2.024096  |
| C | -4.438903 | -0.212255 | -1.445878 |
| H | -2.369254 | 0.334119  | -1.661939 |
| C | -5.404769 | -0.782860 | -0.618462 |
| H | -5.786983 | -1.725549 | 1.282213  |
| H | -4.718058 | 0.187636  | -2.415480 |
| H | -6.438551 | -0.836504 | -0.944349 |

TS\_B\_D\_R1Ph\_R2Ph\_XO  
 SCF Energy: -1032.23342945  
 Num. Imaginary Frequencies: 1  
 Imaginary Frequency: -583.5228

|   |           |           |           |
|---|-----------|-----------|-----------|
| C | -0.690398 | -0.177361 | -0.544561 |
| N | -0.250925 | 0.678435  | -1.585833 |
| N | 1.070964  | 0.723133  | -1.536274 |
| C | -1.932340 | -0.962155 | -0.464291 |
| C | -2.915759 | -1.046727 | -1.449194 |
| C | -2.059532 | -1.716743 | 0.713434  |
| C | -4.045302 | -1.835243 | -1.237185 |
| H | -2.788891 | -0.498859 | -2.378272 |
| C | -3.189236 | -2.497508 | 0.932751  |
| C | -4.184417 | -2.545009 | -0.043246 |
| H | -4.811738 | -1.898173 | -2.001958 |
| H | -3.271276 | -3.060178 | 1.856578  |
| H | -5.065848 | -3.155417 | 0.124442  |
| C | -1.025290 | 1.590385  | -0.207836 |
| C | -2.310920 | 2.039818  | -0.482949 |
| C | -0.190072 | 2.260716  | 0.679784  |
| C | -2.781721 | 3.175038  | 0.178089  |
| H | -2.937089 | 1.526689  | -1.202950 |
| C | -0.674002 | 3.391711  | 1.328648  |
| H | 0.821638  | 1.912751  | 0.863324  |
| C | -1.971132 | 3.851578  | 1.086348  |
| H | -3.784787 | 3.531061  | -0.033367 |
| H | -0.030828 | 3.913759  | 2.029682  |
| H | -2.340368 | 4.734645  | 1.596653  |
| O | -1.093852 | -1.653269 | 1.685420  |
| C | 0.263514  | -1.683313 | 1.218045  |
| H | 0.878052  | -1.449437 | 2.090826  |
| H | 0.498283  | -2.705490 | 0.887343  |
| C | 0.447238  | -0.698022 | 0.108747  |
| C | 1.517625  | -0.120569 | -0.556789 |
| C | 2.961657  | -0.281598 | -0.318278 |
| C | 3.859305  | 0.701027  | -0.757260 |



|   |          |           |           |
|---|----------|-----------|-----------|
| C | 3.454435 | -1.406696 | 0.354244  |
| C | 5.223825 | 0.559958  | -0.521120 |
| H | 3.474782 | 1.572348  | -1.276874 |
| C | 4.820671 | -1.545836 | 0.588517  |
| H | 2.776241 | -2.190528 | 0.677817  |
| C | 5.708186 | -0.562065 | 0.153435  |
| H | 5.910894 | 1.328198  | -0.861358 |
| H | 5.191073 | -2.424726 | 1.106254  |
| H | 6.772402 | -0.669785 | 0.337253  |

TS\_B\_E\_R1Ph\_R2Ph\_XO  
 SCF Energy: -1032.24298777  
 Num. Imaginary Frequencies: 1  
 Imaginary Frequency: -509.4344

|   |           |           |           |
|---|-----------|-----------|-----------|
| C | 0.803949  | -0.560147 | -0.691362 |
| N | 0.292049  | -0.712399 | -1.960138 |
| N | -1.026597 | -0.736603 | -1.887097 |
| C | 0.524767  | 1.074584  | -0.123667 |
| C | 0.410378  | 2.073533  | -1.091585 |
| C | 0.941365  | 1.386108  | 1.173471  |
| C | 0.785661  | 3.369515  | -0.757142 |
| H | 0.087895  | 1.819410  | -2.096358 |
| C | 1.340601  | 2.675941  | 1.505097  |
| C | 1.271153  | 3.661923  | 0.524217  |
| H | 0.728699  | 4.150550  | -1.507233 |
| H | 1.658653  | 2.894466  | 2.518402  |
| H | 1.577107  | 4.674436  | 0.765286  |

|   |           |           |           |
|---|-----------|-----------|-----------|
| C | 2.217085  | -0.938600 | -0.411017 |
| C | 2.494014  | -2.077236 | 0.347994  |
| C | 3.263940  | -0.187807 | -0.951069 |
| C | 3.816086  | -2.460745 | 0.570816  |
| H | 1.679045  | -2.671333 | 0.751816  |
| C | 4.583221  | -0.575914 | -0.732917 |
| H | 3.037818  | 0.700874  | -1.534854 |
| C | 4.860392  | -1.710877 | 0.031443  |
| H | 4.028170  | -3.345827 | 1.161807  |
| H | 5.394804  | 0.008622  | -1.154019 |
| H | 5.889167  | -2.009850 | 0.205200  |
| O | 0.867761  | 0.387011  | 2.091756  |
| C | -0.205945 | -0.493471 | 1.731764  |
| C | -0.327377 | -0.498679 | 0.231827  |
| C | -1.455729 | -0.641911 | -0.617472 |
| C | -2.881858 | -0.595205 | -0.272691 |
| C | -3.789202 | 0.029940  | -1.141148 |
| C | -3.362633 | -1.172406 | 0.910898  |
| C | -5.143626 | 0.082835  | -0.825972 |
| H | -3.418564 | 0.476168  | -2.058588 |
| C | -4.718400 | -1.110458 | 1.227988  |
| H | -2.683639 | -1.705068 | 1.570805  |
| C | -5.612078 | -0.481381 | 0.362195  |
| H | -5.835032 | 0.571527  | -1.505260 |
| H | -5.076899 | -1.565516 | 2.145806  |
| H | -6.668136 | -0.435637 | 0.608229  |
| H | 0.036665  | -1.483477 | 2.122688  |
| H | -1.130582 | -0.129658 | 2.192879  |

R1Ph\_R2Ph\_XCH2:

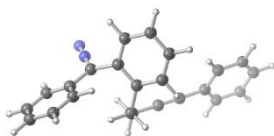

| FILE                    | SCF E       | SCF+ZPVE    | H           | TS         | G            |
|-------------------------|-------------|-------------|-------------|------------|--------------|
| A_R1Ph_R2Ph_XCH2_conf9  | -625201.988 | -624984.424 | -624970.53  | 48.9363199 | -625019.4659 |
| A_R1Ph_R2Ph_XCH2_conf6  | -625201.988 | -624984.423 | -624970.53  | 48.9331824 | -625019.4627 |
| A_R1Ph_R2Ph_XCH2_conf12 | -625203.054 | -624985.424 | -624971.614 | 47.2119241 | -625018.8259 |
| A_R1Ph_R2Ph_XCH2_conf11 | -625201.322 | -624983.762 | -624969.811 | 48.7505771 | -625018.5616 |
| A_R1Ph_R2Ph_XCH2_conf8  | -625201.322 | -624983.762 | -624969.811 | 48.7499496 | -625018.5609 |
| A_R1Ph_R2Ph_XCH2_conf10 | -625201.322 | -624983.762 | -624969.811 | 48.7493221 | -625018.5603 |
| A_R1Ph_R2Ph_XCH2_conf14 | -625202.779 | -624985.128 | -624971.36  | 47.1428981 | -625018.503  |
| A_R1Ph_R2Ph_XCH2_conf2  | -625202.779 | -624985.126 | -624971.36  | 47.1359955 | -625018.4961 |
| A_R1Ph_R2Ph_XCH2_conf5  | -625200.833 | -624983.237 | -624969.339 | 48.0226662 | -625017.3614 |
| A_R1Ph_R2Ph_XCH2_conf7  | -625202.189 | -624984.433 | -624970.692 | 46.5768846 | -625017.269  |
| A_R1Ph_R2Ph_XCH2        | -625200.309 | -624982.67  | -624968.758 | 48.4989459 | -625017.2568 |
| A_R1Ph_R2Ph_XCH2_conf13 | -625200.351 | -624982.7   | -624968.805 | 48.0603168 | -625016.8657 |
| A_R1Ph_R2Ph_XCH2_conf4  | -625200.935 | -624983.227 | -624969.396 | 47.4579078 | -625016.8535 |
| B_R1Ph_R2Ph_XCH2_conf4  | -625249.451 | -625029.102 | -625016.777 | 43.0433792 | -625059.82   |
| B_R1Ph_R2Ph_XCH2_conf5  | -625249.452 | -625029.104 | -625016.779 | 43.0151413 | -625059.7944 |
| B_R1Ph_R2Ph_XCH2_conf2  | -625249.452 | -625029.104 | -625016.779 | 43.0113762 | -625059.7907 |
| B_R1Ph_R2Ph_XCH2_conf3  | -625249.452 | -625029.104 | -625016.779 | 43.0088662 | -625059.7882 |
| B_R1Ph_R2Ph_XCH2        | -625248.736 | -625028.344 | -625016.014 | 42.6329881 | -625058.6473 |
| B_R1Ph_R2Ph_XCH2_conf1  | -625248.736 | -625028.344 | -625016.014 | 42.6329881 | -625058.6473 |
| C_R1Ph_R2Ph_XCH2_conf2  | -625258.949 | -625038.097 | -625025.86  | 42.1397657 | -625067.9999 |
| C_R1Ph_R2Ph_XCH2        | -625258.949 | -625038.096 | -625025.86  | 42.1385107 | -625067.9986 |
| C_R1Ph_R2Ph_XCH2_conf1  | -625258.949 | -625038.096 | -625025.86  | 42.1385107 | -625067.9986 |
| D_R1Ph_R2Ph_XCH2_conf3  | -625277.502 | -625056.214 | -625043.992 | 42.2232244 | -625086.215  |
| D_R1Ph_R2Ph_XCH2        | -625277.502 | -625056.214 | -625043.992 | 42.2213419 | -625086.2131 |
| D_R1Ph_R2Ph_XCH2_conf4  | -625276.381 | -625055.118 | -625042.872 | 42.359394  | -625085.2312 |
| D_R1Ph_R2Ph_XCH2_conf2  | -625276.381 | -625055.118 | -625042.872 | 42.3575114 | -625085.23   |
| D_R1Ph_R2Ph_XCH2_conf1  | -625276.381 | -625055.118 | -625042.873 | 42.3562564 | -625085.2293 |
| E_R1Ph_R2Ph_XCH2        | -625258.035 | -625037.593 | -625025.142 | 43.0082387 | -625068.1498 |
| E_R1Ph_R2Ph_XCH2_conf5  | -625258.035 | -625037.593 | -625025.141 | 43.0076112 | -625068.1486 |
| E_R1Ph_R2Ph_XCH2_conf4  | -625258.035 | -625037.593 | -625025.141 | 43.0069837 | -625068.1479 |
| E_R1Ph_R2Ph_XCH2_conf2  | -625258.035 | -625037.592 | -625025.14  | 43.0076112 | -625068.1479 |
| E_R1Ph_R2Ph_XCH2_conf6  | -625258.035 | -625037.593 | -625025.142 | 43.0051011 | -625068.1467 |
| E_R1Ph_R2Ph_XCH2_conf3  | -625258.035 | -625037.592 | -625025.141 | 43.0051011 | -625068.146  |
| E_R1Ph_R2Ph_XCH2_conf1  | -625258.035 | -625037.593 | -625025.142 | 43.0038461 | -625068.1454 |
| TS_A_B_R1Ph_R2Ph_XCH2   | -625179.045 | -624961.739 | -624948.688 | 44.8148382 | -624993.5029 |

|                       |             |             |             |            |              |
|-----------------------|-------------|-------------|-------------|------------|--------------|
| TS_B_C_R1Ph_R2Ph_XCH2 | -625222.151 | -625002.787 | -624990.771 | 41.2505849 | -625032.0215 |
| TS_B_D_R1Ph_R2Ph_XCH2 | -625218.588 | -624999.441 | -624987.384 | 41.5172764 | -625028.901  |
| TS_B_E_R1Ph_R2Ph_XCH2 | -625223.258 | -625004.129 | -624992.006 | 42.0010861 | -625034.0071 |

|                               |           |           |           |                               |           |           |           |
|-------------------------------|-----------|-----------|-----------|-------------------------------|-----------|-----------|-----------|
| <b>A_R1Ph_R2Ph_XCH2_conf9</b> |           |           |           | C                             | 1.952716  | 2.011243  | -1.359854 |
| SCF Energy: -996.322918125    |           |           |           | C                             | 1.600324  | 1.678278  | 1.025473  |
| Num. Imaginary Frequencies: 0 |           |           |           | C                             | 2.590315  | 3.224642  | -1.096023 |
| C                             | 2.258935  | 0.184603  | 0.927483  | H                             | 1.839333  | 1.657802  | -2.379400 |
| N                             | 2.069467  | -0.244676 | 2.143137  | C                             | 2.236518  | 2.894815  | 1.271316  |
| N                             | 1.910696  | -0.634965 | 3.200144  | C                             | 2.731632  | 3.665646  | 0.218065  |
| C                             | 1.218683  | 1.096490  | 0.372938  | H                             | 2.973268  | 3.821977  | -1.917246 |
| C                             | 0.987045  | 2.328384  | 0.995400  | H                             | 2.342485  | 3.242653  | 2.295489  |
| C                             | 0.471127  | 0.731125  | -0.763910 | H                             | 3.223583  | 4.610738  | 0.425526  |
| C                             | 0.023022  | 3.206583  | 0.505426  | C                             | 1.661771  | -1.301016 | -0.256639 |
| H                             | 1.578193  | 2.598386  | 1.866364  | C                             | 1.088598  | -2.535080 | 0.067459  |
| C                             | -0.477773 | 1.633458  | -1.253291 | C                             | 3.047507  | -1.205539 | -0.394387 |
| C                             | -0.706427 | 2.859141  | -0.629608 | C                             | 1.891962  | -3.657271 | 0.256427  |
| H                             | -0.147109 | 4.157269  | 1.000234  | H                             | 0.009796  | -2.618763 | 0.172822  |
| H                             | -1.061542 | 1.356527  | -2.127488 | C                             | 3.851491  | -2.329956 | -0.204167 |
| H                             | -1.455252 | 3.536984  | -1.027625 | H                             | 3.502603  | -0.252063 | -0.644861 |
| C                             | 3.505917  | -0.200175 | 0.253435  | C                             | 3.277263  | -3.556912 | 0.123103  |
| C                             | 3.890935  | 0.466265  | -0.921296 | H                             | 1.435563  | -4.608845 | 0.510043  |
| C                             | 4.333547  | -1.220285 | 0.751345  | H                             | 4.928157  | -2.243295 | -0.311247 |
| C                             | 5.068624  | 0.118120  | -1.576988 | H                             | 3.904197  | -4.429840 | 0.274450  |
| H                             | 3.263505  | 1.259793  | -1.317367 | C                             | 1.075219  | 0.797877  | 2.134486  |
| C                             | 5.513123  | -1.557155 | 0.093734  | H                             | 1.762281  | -0.048855 | 2.258786  |
| H                             | 4.054639  | -1.758196 | 1.653454  | H                             | 1.064382  | 1.341777  | 3.081829  |
| C                             | 5.888270  | -0.893138 | -1.074878 | C                             | -0.333794 | 0.244902  | 1.824495  |
| H                             | 5.348169  | 0.645617  | -2.483790 | H                             | -0.507491 | -0.658954 | 2.421245  |
| H                             | 6.138711  | -2.348286 | 0.495328  | H                             | -1.105707 | 0.968128  | 2.112362  |
| H                             | 6.806482  | -1.160719 | -1.587136 | C                             | -0.466010 | -0.051969 | 0.366404  |
| C                             | 0.610612  | -0.628294 | -1.405497 | C                             | -1.521417 | -0.151765 | -0.464066 |
| H                             | 0.166504  | -0.601798 | -2.404847 | C                             | -2.966537 | -0.119067 | -0.214866 |
| H                             | 1.662490  | -0.904434 | -1.520657 | C                             | -3.485221 | -0.454603 | 1.044024  |
| C                             | -0.084214 | -1.736860 | -0.582294 | C                             | -3.850630 | 0.256918  | -1.236912 |
| H                             | 0.054746  | -2.699311 | -1.085019 | C                             | -4.856710 | -0.398471 | 1.280127  |
| H                             | 0.393872  | -1.819075 | 0.400909  | H                             | -2.817854 | -0.782203 | 1.834866  |
| C                             | -1.514878 | -1.473804 | -0.407310 | C                             | -5.221131 | 0.309347  | -0.997570 |
| C                             | -2.687245 | -1.192677 | -0.285263 | H                             | -3.455095 | 0.509442  | -2.215074 |
| C                             | -4.070052 | -0.830956 | -0.134553 | C                             | -5.728692 | -0.014201 | 0.261464  |
| C                             | -4.429147 | 0.521318  | -0.017148 | H                             | -5.244779 | -0.663928 | 2.258399  |
| C                             | -5.071240 | -1.813621 | -0.104452 | H                             | -5.894678 | 0.604960  | -1.795770 |
| C                             | -5.766238 | 0.880130  | 0.127507  | H                             | -6.797474 | 0.027120  | 0.445696  |
| H                             | -3.651563 | 1.278992  | -0.039381 | <b>C_R1Ph_R2Ph_XCH2_conf2</b> |           |           |           |
| C                             | -6.406517 | -1.447098 | 0.041279  | SCF Energy: -996.413691002    |           |           |           |
| H                             | -4.793977 | -2.858990 | -0.195048 | Num. Imaginary Frequencies: 0 |           |           |           |
| C                             | -6.757839 | -0.101563 | 0.157265  | C                             | 1.076133  | -1.046222 | 0.566438  |
| H                             | -6.034675 | 1.927920  | 0.218105  | N                             | 0.606937  | -1.910148 | 1.398240  |
| H                             | -7.174328 | -2.213879 | 0.064353  | N                             | -0.806964 | -1.903546 | 1.302715  |
| H                             | -7.799637 | 0.180742  | 0.270691  | C                             | 2.487463  | -0.852517 | 0.241740  |
| <b>B_R1Ph_R2Ph_XCH2_conf4</b> |           |           |           | C                             | 3.502774  | -1.131232 | 1.166097  |
| SCF Energy: -996.398555569    |           |           |           | C                             | 2.794890  | -0.415886 | -1.058304 |
| Num. Imaginary Frequencies: 0 |           |           |           | C                             | 4.833450  | -0.964575 | 0.806882  |
| C                             | 0.756682  | -0.088662 | -0.504269 | H                             | 3.229678  | -1.467052 | 2.161714  |
| N                             | 0.198978  | -0.209911 | -1.874253 | C                             | 4.141347  | -0.261530 | -1.403189 |
| N                             | -1.046768 | -0.254711 | -1.820873 | C                             | 5.151167  | -0.528356 | -0.483303 |
| C                             | 1.463471  | 1.243262  | -0.304431 | H                             | 5.621533  | -1.171491 | 1.523300  |
|                               |           |           |           | H                             | 4.397192  | 0.066395  | -2.407511 |

|   |           |           |           |
|---|-----------|-----------|-----------|
| H | 6.189790  | -0.400346 | -0.771765 |
| C | -0.051813 | 1.158113  | 0.173158  |
| C | -0.203396 | 2.172402  | -0.774831 |
| C | 0.014823  | 1.508480  | 1.527311  |
| C | -0.278009 | 3.508866  | -0.379460 |
| H | -0.274103 | 1.936120  | -1.832275 |
| C | -0.061781 | 2.840393  | 1.924116  |
| H | 0.123380  | 0.729697  | 2.279371  |
| C | -0.205625 | 3.847772  | 0.969344  |
| H | -0.394351 | 4.282463  | -1.131798 |
| H | -0.008766 | 3.090538  | 2.978855  |
| H | -0.262906 | 4.887264  | 1.275630  |
| C | 1.710288  | -0.118750 | -2.075252 |
| H | 1.685991  | 0.965213  | -2.232516 |
| H | 1.993050  | -0.559299 | -3.036459 |
| C | 0.309612  | -0.623686 | -1.689154 |
| H | -0.445694 | -0.187538 | -2.349083 |
| H | 0.256623  | -1.709478 | -1.827232 |
| C | 0.001542  | -0.328087 | -0.205447 |
| C | -1.183619 | -1.070165 | 0.388498  |
| C | -2.603905 | -0.887593 | 0.047886  |
| C | -3.576204 | -1.684188 | 0.674626  |
| C | -3.009853 | 0.059227  | -0.900578 |
| C | -4.920020 | -1.533161 | 0.356616  |
| H | -3.261539 | -2.419504 | 1.407241  |
| C | -4.359431 | 0.208778  | -1.217359 |
| H | -2.278969 | 0.693776  | -1.388040 |
| C | -5.316877 | -0.585523 | -0.591177 |
| H | -5.662006 | -2.155265 | 0.846811  |
| H | -4.659074 | 0.948332  | -1.952768 |
| H | -6.367372 | -0.469336 | -0.838114 |

D\_R1Ph\_R2Ph\_XCH2\_conf3  
 SCF Energy: -996.443256579  
 Num. Imaginary Frequencies: 0

|   |           |           |           |
|---|-----------|-----------|-----------|
| C | -0.480414 | 0.479488  | 0.026504  |
| N | -0.373226 | -0.880209 | 0.074007  |
| N | 0.912794  | -1.278422 | 0.090399  |
| C | -1.665914 | 1.339870  | 0.110010  |
| C | -2.896622 | 0.953133  | 0.652650  |
| C | -1.467029 | 2.674554  | -0.307010 |
| C | -3.941708 | 1.869823  | 0.745320  |
| H | -3.038424 | -0.059509 | 1.015527  |
| C | -2.523978 | 3.577477  | -0.202682 |
| C | -3.759310 | 3.181797  | 0.311601  |
| H | -4.892773 | 1.559546  | 1.165912  |
| H | -2.375785 | 4.604794  | -0.525075 |
| H | -4.570688 | 3.899033  | 0.384790  |
| C | -1.398828 | -1.864772 | -0.018278 |
| C | -2.358932 | -1.766005 | -1.024433 |
| C | -1.409537 | -2.924816 | 0.885706  |
| C | -3.359473 | -2.731343 | -1.106830 |
| H | -2.319570 | -0.940249 | -1.728118 |
| C | -2.405910 | -3.893769 | 0.784895  |
| H | -0.644004 | -2.978388 | 1.652328  |
| C | -3.384726 | -3.795631 | -0.204585 |
| H | -4.112172 | -2.657167 | -1.884831 |
| H | -2.420436 | -4.721999 | 1.485768  |
| H | -4.162469 | -4.548937 | -0.275578 |
| C | -0.125058 | 3.087714  | -0.874932 |
| H | -0.072579 | 2.759964  | -1.922375 |

|   |           |           |           |
|---|-----------|-----------|-----------|
| H | -0.044330 | 4.178008  | -0.872841 |
| C | 1.052910  | 2.456496  | -0.116448 |
| H | 1.986892  | 2.658596  | -0.649023 |
| H | 1.144060  | 2.909866  | 0.880358  |
| C | 0.808545  | 0.980685  | -0.005881 |
| C | 1.642848  | -0.161912 | 0.051676  |
| C | 3.115318  | -0.230865 | 0.048300  |
| C | 3.877578  | 0.810650  | 0.591839  |
| C | 3.773287  | -1.342717 | -0.495073 |
| C | 5.270289  | 0.746263  | 0.584211  |
| H | 3.380532  | 1.664653  | 1.042420  |
| C | 5.163859  | -1.407884 | -0.496603 |
| H | 3.183505  | -2.149144 | -0.919395 |
| C | 5.917700  | -0.361946 | 0.039406  |
| H | 5.848563  | 1.559342  | 1.011892  |
| H | 5.661374  | -2.273665 | -0.922644 |
| H | 7.001952  | -0.412059 | 0.033854  |

E\_R1Ph\_R2Ph\_XCH2\_conf1  
 SCF Energy: -996.412233872  
 Num. Imaginary Frequencies: 0

|   |           |           |           |
|---|-----------|-----------|-----------|
| C | 1.139062  | -1.219963 | -0.167213 |
| N | 0.705365  | -2.284212 | -0.755575 |
| N | -0.705377 | -2.284191 | -0.755605 |
| C | 0.000068  | 1.030981  | -0.366172 |
| C | 0.000012  | 1.294413  | -1.732277 |
| C | 0.000058  | 2.058764  | 0.575837  |
| C | 0.000003  | 2.624234  | -2.154399 |
| H | -0.000045 | 0.481531  | -2.454724 |
| C | 0.000139  | 3.385938  | 0.150890  |
| C | 0.000092  | 3.662144  | -1.217622 |
| H | -0.000051 | 2.853791  | -3.215001 |
| H | 0.000183  | 4.195918  | 0.874943  |
| H | 0.000138  | 4.692704  | -1.558336 |
| C | 2.579220  | -0.958746 | -0.002023 |
| C | 3.051542  | 0.246684  | 0.533573  |
| C | 3.505662  | -1.943722 | -0.381544 |
| C | 4.420323  | 0.463965  | 0.684756  |
| H | 2.358927  | 1.029062  | 0.823459  |
| C | 4.869157  | -1.723622 | -0.230033 |
| H | 3.140008  | -2.878790 | -0.791971 |
| C | 5.331931  | -0.518192 | 0.304138  |
| H | 4.771002  | 1.403856  | 1.098554  |
| H | 5.574566  | -2.493248 | -0.526602 |
| H | 6.397323  | -0.348108 | 0.422580  |
| C | -0.000086 | 1.525913  | 1.987283  |
| H | 0.877717  | 1.874255  | 2.542138  |
| H | -0.878064 | 1.874194  | 2.541895  |
| C | -0.000047 | -0.018956 | 1.835207  |
| H | 0.878353  | -0.464429 | 2.307037  |
| H | -0.878523 | -0.464391 | 2.306924  |
| C | 0.000015  | -0.338252 | 0.301703  |
| C | -1.139080 | -1.219966 | -0.167246 |
| C | -2.579241 | -0.958688 | -0.002045 |
| C | -3.051587 | 0.246841  | 0.533325  |
| C | -3.505661 | -1.943779 | -0.381307 |
| C | -4.420371 | 0.464102  | 0.684491  |
| H | -2.358988 | 1.029282  | 0.823074  |
| C | -4.869167 | -1.723681 | -0.229841 |
| H | -3.139975 | -2.878948 | -0.791476 |
| C | -5.331962 | -0.518152 | 0.304074  |

|   |           |           |           |
|---|-----------|-----------|-----------|
| H | -4.771074 | 1.404058  | 1.098123  |
| H | -5.574554 | -2.493404 | -0.526209 |
| H | -6.397356 | -0.348076 | 0.422510  |

E\_R1Ph\_R2Ph\_XCH2\_conf2  
 SCF Energy: -996.412233815  
 Num. Imaginary Frequencies: 0

|   |           |           |           |
|---|-----------|-----------|-----------|
| C | 1.139412  | -1.219565 | -0.167783 |
| N | 0.705866  | -2.283957 | -0.756093 |
| N | -0.704915 | -2.284243 | -0.755816 |
| C | -0.000688 | 1.031058  | -0.366168 |
| C | -0.002419 | 1.294574  | -1.732231 |
| C | 0.000099  | 2.058739  | 0.575928  |
| C | -0.003108 | 2.624408  | -2.154247 |
| H | -0.003291 | 0.481699  | -2.454695 |
| C | -0.000711 | 3.385939  | 0.151097  |
| C | -0.002229 | 3.662234  | -1.217390 |
| H | -0.004411 | 2.854059  | -3.214829 |
| H | -0.000147 | 4.195852  | 0.875224  |
| H | -0.002816 | 4.692817  | -1.558037 |
| C | 2.579529  | -0.958254 | -0.002472 |
| C | 3.505951  | -1.943581 | -0.381112 |
| C | 3.051829  | 0.247591  | 0.532195  |
| C | 4.869441  | -1.723463 | -0.229532 |
| H | 3.140273  | -2.878948 | -0.790844 |
| C | 4.420596  | 0.464867  | 0.683490  |
| H | 2.359205  | 1.030329  | 0.821089  |
| C | 5.332200  | -0.517670 | 0.303825  |
| H | 5.574852  | -2.493366 | -0.525380 |
| H | 4.771284  | 1.405072  | 1.096569  |
| H | 6.397582  | -0.347579 | 0.422357  |
| C | 0.001823  | 1.525713  | 1.987263  |
| H | 0.880747  | 1.873472  | 2.540724  |
| H | -0.875048 | 1.874418  | 2.543359  |
| C | 0.000801  | -0.019142 | 1.835066  |
| H | 0.878956  | -0.465260 | 2.306735  |
| H | -0.877918 | -0.464036 | 2.306860  |
| C | 0.000262  | -0.338226 | 0.301579  |
| C | -1.138635 | -1.220231 | -0.167182 |
| C | -2.578779 | -0.959022 | -0.001801 |
| C | -3.051190 | 0.246184  | 0.534256  |
| C | -3.505116 | -1.944075 | -0.381334 |
| C | -4.419986 | 0.463250  | 0.685579  |
| H | -2.358631 | 1.028483  | 0.824506  |
| C | -4.868629 | -1.724189 | -0.229662 |
| H | -3.139338 | -2.879069 | -0.791835 |
| C | -5.331507 | -0.518911 | 0.304763  |
| H | -4.770751 | 1.402962  | 1.099713  |
| H | -5.573961 | -2.493880 | -0.526246 |
| H | -6.396910 | -0.348984 | 0.423336  |

E\_R1Ph\_R2Ph\_XCH2\_conf3  
 SCF Energy: -996.412233878  
 Num. Imaginary Frequencies: 0

|   |           |           |          |
|---|-----------|-----------|----------|
| C | -1.138990 | -1.219973 | 0.167268 |
| N | -0.705285 | -2.284220 | 0.755593 |
| N | 0.705446  | -2.284195 | 0.755612 |
| C | -0.000039 | 1.031060  | 0.366188 |
| C | -0.000005 | 1.294503  | 1.732323 |

|   |           |           |           |
|---|-----------|-----------|-----------|
| C | -0.000182 | 2.058807  | -0.575858 |
| C | -0.000150 | 2.624317  | 2.154393  |
| H | 0.000131  | 0.481628  | 2.454778  |
| C | -0.000342 | 3.385975  | -0.150940 |
| C | -0.000334 | 3.662195  | 1.217572  |
| H | -0.000128 | 2.853920  | 3.214985  |
| H | -0.000447 | 4.195939  | -0.875008 |
| H | -0.000465 | 4.692760  | 1.558275  |
| C | -2.579147 | -0.958746 | 0.002029  |
| C | -3.505532 | -1.943754 | 0.381599  |
| C | -3.051533 | 0.246605  | -0.533689 |
| C | -4.869044 | -1.723745 | 0.230074  |
| H | -3.139810 | -2.878781 | 0.792060  |
| C | -4.420326 | 0.463791  | -0.684890 |
| H | -2.358960 | 1.028973  | -0.823686 |
| C | -5.331883 | -0.518383 | -0.304185 |
| H | -5.574407 | -2.493397 | 0.526685  |
| H | -4.771060 | 1.403621  | -1.098783 |
| H | -6.397284 | -0.348367 | -0.422645 |
| C | -0.000011 | 1.525901  | -1.987263 |
| H | -0.877879 | 1.874105  | -2.542099 |
| H | 0.877899  | 1.874303  | -2.541910 |
| C | 0.000156  | -0.018983 | -1.835146 |
| H | -0.878201 | -0.464543 | -2.306965 |
| H | 0.878687  | -0.464352 | -2.306819 |
| C | 0.000061  | -0.338190 | -0.301621 |
| C | 1.139114  | -1.219894 | 0.167339  |
| C | 2.579250  | -0.958617 | 0.002090  |
| C | 3.505654  | -1.943746 | 0.381294  |
| C | 3.051599  | 0.246926  | -0.533229 |
| C | 4.869157  | -1.723692 | 0.229751  |
| H | 3.139946  | -2.878904 | 0.791476  |
| C | 4.420381  | 0.464144  | -0.684477 |
| H | 2.358999  | 1.029416  | -0.822856 |
| C | 5.331959  | -0.518165 | -0.304166 |
| H | 5.574541  | -2.493435 | 0.526077  |
| H | 4.771096  | 1.404111  | -1.098076 |
| H | 6.397352  | -0.348119 | -0.422661 |

E\_R1Ph\_R2Ph\_XCH2\_conf4  
 SCF Energy: -996.412233890  
 Num. Imaginary Frequencies: 0

|   |           |           |           |
|---|-----------|-----------|-----------|
| C | -1.139019 | -1.219941 | 0.167312  |
| N | -0.705296 | -2.284110 | 0.755781  |
| N | 0.705405  | -2.284050 | 0.755893  |
| C | -0.000124 | 1.031101  | 0.366173  |
| C | -0.000187 | 1.294660  | 1.732258  |
| C | -0.000111 | 2.058792  | -0.575940 |
| C | -0.000204 | 2.624501  | 2.154253  |
| H | -0.000200 | 0.481841  | 2.454774  |
| C | -0.000153 | 3.386021  | -0.151102 |
| C | -0.000176 | 3.662318  | 1.217385  |
| H | -0.000227 | 2.854158  | 3.214835  |
| H | -0.000122 | 4.195938  | -0.875221 |
| H | -0.000182 | 4.692901  | 1.558032  |
| C | -2.579193 | -0.958753 | 0.002034  |
| C | -3.505576 | -1.943828 | 0.381440  |
| C | -3.051599 | 0.246635  | -0.533577 |
| C | -4.869087 | -1.723827 | 0.229909  |
| H | -3.139857 | -2.878902 | 0.791796  |
| C | -4.420392 | 0.463816  | -0.684790 |

|   |           |           |           |
|---|-----------|-----------|-----------|
| H | -2.359065 | 1.029088  | -0.823435 |
| C | -5.331939 | -0.518413 | -0.304222 |
| H | -5.574440 | -2.493533 | 0.526405  |
| H | -4.771128 | 1.403687  | -1.098588 |
| H | -6.397340 | -0.348405 | -0.422692 |
| C | 0.000233  | 1.525836  | -1.987330 |
| H | -0.877480 | 1.874111  | -2.542372 |
| H | 0.878288  | 1.874114  | -2.541828 |
| C | 0.000134  | -0.019000 | -1.835089 |
| H | -0.878294 | -0.464463 | -2.306862 |
| H | 0.878589  | -0.464532 | -2.306756 |
| C | 0.000030  | -0.338240 | -0.301604 |
| C | 1.139095  | -1.219815 | 0.167466  |
| C | 2.579254  | -0.958644 | 0.002189  |
| C | 3.051655  | 0.246969  | -0.532908 |
| C | 3.505611  | -1.943930 | 0.381089  |
| C | 4.420438  | 0.464133  | -0.684205 |
| H | 2.359077  | 1.029551  | -0.822332 |
| C | 4.869121  | -1.723942 | 0.229485  |
| H | 3.139900  | -2.879158 | 0.791092  |
| C | 5.331975  | -0.518327 | -0.304183 |
| H | 4.771175  | 1.404165  | -1.097632 |
| H | 5.574458  | -2.493833 | 0.525545  |
| H | 6.397371  | -0.348340 | -0.422735 |

E\_R1Ph\_R2Ph\_XCH2\_conf5  
 SCF Energy: -996.412233923  
 Num. Imaginary Frequencies: 0

|   |           |           |           |
|---|-----------|-----------|-----------|
| C | 1.139082  | -1.219790 | -0.167690 |
| N | 0.705383  | -2.283952 | -0.756187 |
| N | -0.705323 | -2.283916 | -0.756263 |
| C | 0.000027  | 1.031256  | -0.366253 |
| C | 0.000103  | 1.294967  | -1.732324 |
| C | -0.000048 | 2.058804  | 0.575967  |
| C | 0.000118  | 2.624853  | -2.154151 |
| H | 0.000154  | 0.482238  | -2.454939 |
| C | -0.000118 | 3.386069  | 0.151303  |
| C | -0.000003 | 3.662552  | -1.217150 |
| H | 0.000210  | 2.854646  | -3.214703 |
| H | -0.000252 | 4.195893  | 0.875527  |
| H | -0.000018 | 4.693180  | -1.557661 |
| C | 2.579239  | -0.958697 | -0.002158 |
| C | 3.051616  | 0.246660  | 0.533538  |
| C | 3.505611  | -1.943819 | -0.381461 |
| C | 4.420397  | 0.463751  | 0.684993  |
| H | 2.359046  | 1.029115  | 0.823319  |
| C | 4.869108  | -1.723910 | -0.229674 |
| H | 3.139894  | -2.878855 | -0.791902 |
| C | 5.331944  | -0.518535 | 0.304563  |
| H | 4.771128  | 1.403591  | 1.098866  |
| H | 5.574466  | -2.493650 | -0.526069 |
| H | 6.397336  | -0.348602 | 0.423223  |
| C | -0.000252 | 1.525663  | 1.987276  |
| H | 0.877497  | 1.873954  | 2.542248  |
| H | -0.878290 | 1.873784  | 2.541896  |
| C | -0.000107 | -0.019193 | 1.834920  |
| H | 0.878340  | -0.464655 | 2.306662  |
| H | -0.878545 | -0.464806 | 2.306541  |
| C | 0.000018  | -0.338136 | 0.301351  |
| C | -1.139026 | -1.219773 | -0.167732 |
| C | -2.579183 | -0.958652 | -0.002276 |

|   |           |           |           |
|---|-----------|-----------|-----------|
| C | -3.051643 | 0.246928  | 0.532859  |
| C | -3.505487 | -1.944072 | -0.380969 |
| C | -4.420435 | 0.463936  | 0.684320  |
| H | -2.359140 | 1.029613  | 0.822169  |
| C | -4.868999 | -1.724235 | -0.229193 |
| H | -3.139697 | -2.879291 | -0.790931 |
| C | -5.331914 | -0.518637 | 0.304463  |
| H | -4.771233 | 1.403947  | 1.097746  |
| H | -5.574297 | -2.494212 | -0.525115 |
| H | -6.397313 | -0.348756 | 0.423136  |

E\_R1Ph\_R2Ph\_XCH2\_conf6  
 SCF Energy: -996.412233893  
 Num. Imaginary Frequencies: 0

|   |           |           |           |
|---|-----------|-----------|-----------|
| C | -1.138999 | -1.219913 | 0.167503  |
| N | -0.705304 | -2.283970 | 0.756186  |
| N | 0.705445  | -2.283928 | 0.756254  |
| C | -0.000052 | 1.031093  | 0.366206  |
| C | -0.000156 | 1.294680  | 1.732302  |
| C | -0.000121 | 2.058775  | -0.575890 |
| C | -0.000380 | 2.624539  | 2.154283  |
| H | -0.000094 | 0.481872  | 2.454832  |
| C | -0.000264 | 3.385997  | -0.151091 |
| C | -0.000443 | 3.662342  | 1.217405  |
| H | -0.000479 | 2.854209  | 3.214861  |
| H | -0.000254 | 4.195895  | -0.875232 |
| H | -0.000593 | 4.692933  | 1.558027  |
| C | -2.579148 | -0.958775 | 0.002091  |
| C | -3.505535 | -1.943908 | 0.381326  |
| C | -3.051513 | 0.246649  | -0.533481 |
| C | -4.869036 | -1.723950 | 0.229612  |
| H | -3.139823 | -2.878998 | 0.791652  |
| C | -4.420294 | 0.463785  | -0.684872 |
| H | -2.358938 | 1.029136  | -0.823169 |
| C | -5.331856 | -0.518516 | -0.304503 |
| H | -5.574405 | -2.493701 | 0.525954  |
| H | -4.771015 | 1.403672  | -1.098644 |
| H | -6.397247 | -0.348544 | -0.423119 |
| C | 0.000101  | 1.525769  | -1.987266 |
| H | -0.877708 | 1.874007  | -2.542179 |
| H | 0.878088  | 1.874051  | -2.541863 |
| C | 0.000161  | -0.019102 | -1.835046 |
| H | -0.878164 | -0.464683 | -2.306894 |
| H | 0.878698  | -0.464500 | -2.306677 |
| C | 0.000061  | -0.338232 | -0.301530 |
| C | 1.139135  | -1.219869 | 0.167600  |
| C | 2.579279  | -0.958660 | 0.002155  |
| C | 3.051602  | 0.246914  | -0.533134 |
| C | 3.505714  | -1.943867 | 0.381085  |
| C | 4.420374  | 0.464144  | -0.684470 |
| H | 2.358993  | 1.029428  | -0.822671 |
| C | 4.869204  | -1.723813 | 0.229439  |
| H | 3.140057  | -2.879109 | 0.791112  |
| C | 5.331979  | -0.518206 | -0.304339 |
| H | 4.771052  | 1.404146  | -1.098022 |
| H | 5.574599  | -2.493630 | 0.525545  |
| H | 6.397363  | -0.348158 | -0.422902 |

E\_R1Ph\_R2Ph\_XCH2  
 SCF Energy: -996.412233912



|   |           |           |           |
|---|-----------|-----------|-----------|
| C | 1.234780  | -1.978063 | -1.497003 |
| H | 1.561348  | -2.225014 | -2.510814 |
| H | 0.862987  | -2.909182 | -1.051200 |
| C | 0.066756  | -0.971556 | -1.559653 |
| H | 0.295717  | -0.154729 | -2.249485 |
| H | -0.831597 | -1.467550 | -1.937081 |
| C | -0.205906 | -0.461298 | -0.168642 |
| C | -1.357882 | -0.577367 | 0.647612  |
| C | -2.760146 | -0.618058 | 0.230168  |
| C | -3.738442 | -1.194610 | 1.054177  |
| C | -3.144822 | -0.059336 | -0.996995 |
| C | -5.069682 | -1.218090 | 0.651595  |
| H | -3.441293 | -1.625340 | 2.005259  |
| C | -4.479310 | -0.089214 | -1.398966 |
| H | -2.399621 | 0.419553  | -1.627498 |
| C | -5.444824 | -0.669505 | -0.577548 |
| H | -5.818133 | -1.669511 | 1.295403  |
| H | -4.764725 | 0.349637  | -2.349865 |
| H | -6.484069 | -0.691858 | -0.889621 |

TS\_B\_D\_R1Ph\_R2Ph\_XCH2  
 SCF Energy: -996.349370987  
 Num. Imaginary Frequencies: 1  
 Imaginary Frequency: -585.5287

|   |           |           |           |
|---|-----------|-----------|-----------|
| C | -0.690856 | -0.203656 | -0.511811 |
| N | -0.258767 | 0.624966  | -1.578837 |
| N | 1.064478  | 0.666206  | -1.546025 |
| C | -1.952359 | -0.967246 | -0.433643 |
| C | -2.854694 | -1.083052 | -1.490781 |
| C | -2.158117 | -1.658595 | 0.774264  |
| C | -3.996916 | -1.868369 | -1.339296 |
| H | -2.654607 | -0.570552 | -2.427331 |
| C | -3.303035 | -2.442409 | 0.906658  |
| C | -4.222550 | -2.542246 | -0.139637 |
| H | -4.702520 | -1.960048 | -2.158573 |
| H | -3.474903 | -2.982486 | 1.833916  |
| H | -5.109343 | -3.156766 | -0.020801 |
| C | -1.011863 | 1.574377  | -0.225350 |
| C | -2.302082 | 2.019946  | -0.490118 |
| C | -0.164141 | 2.270824  | 0.631693  |
| C | -2.761147 | 3.174626  | 0.145216  |
| H | -2.940816 | 1.485431  | -1.183325 |
| C | -0.636139 | 3.420565  | 1.255572  |
| H | 0.850124  | 1.926496  | 0.808954  |
| C | -1.936491 | 3.876214  | 1.021174  |
| H | -3.767342 | 3.525494  | -0.060470 |
| H | 0.019000  | 3.961528  | 1.930886  |
| H | -2.296632 | 4.774176  | 1.511659  |
| C | -1.126091 | -1.518967 | 1.871656  |
| H | -1.236251 | -0.530915 | 2.339090  |
| H | -1.299770 | -2.267454 | 2.648631  |
| C | 0.307876  | -1.636147 | 1.320559  |
| H | 1.032865  | -1.392454 | 2.104752  |
| H | 0.501089  | -2.673361 | 1.014974  |
| C | 0.453212  | -0.714788 | 0.148066  |
| C | 1.514650  | -0.155137 | -0.550006 |
| C | 2.962311  | -0.309351 | -0.322595 |
| C | 3.847210  | 0.698176  | -0.730574 |

|   |          |           |           |
|---|----------|-----------|-----------|
| C | 3.472275 | -1.453466 | 0.304080  |
| C | 5.215083 | 0.564267  | -0.509025 |
| H | 3.449684 | 1.583553  | -1.215866 |
| C | 4.842061 | -1.585644 | 0.523145  |
| H | 2.801508 | -2.252776 | 0.602829  |
| C | 5.716368 | -0.576773 | 0.119695  |
| H | 5.891338 | 1.352222  | -0.825292 |
| H | 5.226152 | -2.479484 | 1.004332  |
| H | 6.783054 | -0.679709 | 0.292010  |

TS\_B\_E\_R1Ph\_R2Ph\_XCH2  
 SCF Energy: -996.356813995  
 Num. Imaginary Frequencies: 1  
 Imaginary Frequency: -510.8757

|   |           |           |           |
|---|-----------|-----------|-----------|
| C | 0.824669  | -0.555848 | -0.685236 |
| N | 0.320934  | -0.695510 | -1.954780 |
| N | -0.999636 | -0.732555 | -1.882441 |
| C | 0.504390  | 1.100669  | -0.086556 |
| C | 0.282675  | 2.057724  | -1.075756 |
| C | 0.952789  | 1.445582  | 1.191560  |
| C | 0.552243  | 3.389585  | -0.780092 |
| H | -0.059120 | 1.760674  | -2.062135 |
| C | 1.229218  | 2.785521  | 1.463796  |
| C | 1.039260  | 3.753325  | 0.479911  |
| H | 0.398169  | 4.145116  | -1.543418 |
| H | 1.564416  | 3.069360  | 2.457209  |
| H | 1.254077  | 4.794539  | 0.696727  |
| C | 2.249318  | -0.907334 | -0.429067 |
| C | 2.551734  | -2.099766 | 0.233667  |
| C | 3.280704  | -0.087719 | -0.892351 |
| C | 3.880948  | -2.466408 | 0.439295  |
| H | 1.746463  | -2.740372 | 0.583777  |
| C | 4.608583  | -0.457589 | -0.690124 |
| H | 3.036810  | 0.840667  | -1.402383 |
| C | 4.909920  | -1.645000 | -0.021207 |
| H | 4.111597  | -3.392484 | 0.955966  |
| H | 5.407887  | 0.181741  | -1.050915 |
| H | 5.944877  | -1.929701 | 0.139452  |
| C | 0.962186  | 0.321915  | 2.191099  |
| H | 1.917730  | -0.213270 | 2.158491  |
| H | 0.820875  | 0.687631  | 3.210124  |
| C | -0.197499 | -0.591544 | 1.751728  |
| H | -0.056370 | -1.625627 | 2.082767  |
| H | -1.135882 | -0.225453 | 2.178567  |
| C | -0.298284 | -0.537940 | 0.249539  |
| C | -1.422813 | -0.667731 | -0.609821 |
| C | -2.852244 | -0.634796 | -0.269313 |
| C | -3.752706 | 0.033925  | -1.111876 |
| C | -3.343875 | -1.269390 | 0.880118  |
| C | -5.110369 | 0.072415  | -0.806658 |
| H | -3.374121 | 0.524760  | -2.003123 |
| C | -4.702533 | -1.223249 | 1.187334  |
| H | -2.667799 | -1.827182 | 1.521213  |
| C | -5.589391 | -0.551170 | 0.346768  |
| H | -5.795537 | 0.595306  | -1.466643 |
| H | -5.069159 | -1.723098 | 2.078414  |
| H | -6.647553 | -0.517216 | 0.585909  |



R1Ph\_R2Ph\_XNMs:

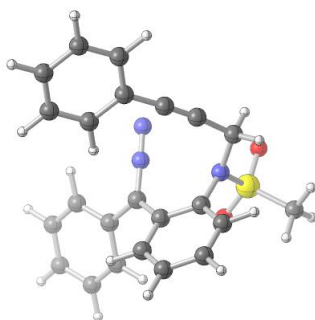

| FILE                        | SCF E       | SCF+ZPVE    | H           | TS         | G            |
|-----------------------------|-------------|-------------|-------------|------------|--------------|
| A_R1Ph_R2Ph_XNMs            | -1004107.45 | -1003873.28 | -1003856.52 | 54.6604606 | -1003911.177 |
| A_R1Ph_R2Ph_XNMs_conf15     | -1004107.12 | -1003873    | -1003856.24 | 54.721329  | -1003910.964 |
| A_R1Ph_R2Ph_XNMs_conf18     | -1004107.43 | -1003873.3  | -1003856.52 | 54.2983877 | -1003910.818 |
| A_R1Ph_R2Ph_XNMs_conf5      | -1004109.04 | -1003874.78 | -1003858.17 | 52.4447249 | -1003910.618 |
| A_R1Ph_R2Ph_XNMs_conf16     | -1004109.04 | -1003874.78 | -1003858.17 | 52.4409599 | -1003910.614 |
| A_R1Ph_R2Ph_XNMs_conf17     | -1004109.04 | -1003874.78 | -1003858.17 | 52.4390773 | -1003910.611 |
| A_R1Ph_R2Ph_XNMs_conf8      | -1004106.67 | -1003872.64 | -1003855.86 | 54.6962286 | -1003910.552 |
| A_R1Ph_R2Ph_XNMs_conf7      | -1004106.75 | -1003872.68 | -1003855.9  | 54.5079758 | -1003910.412 |
| A_R1Ph_R2Ph_XNMs_conf6      | -1004107.93 | -1003873.79 | -1003857.12 | 52.9894031 | -1003910.105 |
| A_R1Ph_R2Ph_XNMs_conf4      | -1004107.93 | -1003873.79 | -1003857.12 | 52.9799904 | -1003910.095 |
| A_R1Ph_R2Ph_XNMs_conf13     | -1004106.54 | -1003872.36 | -1003855.62 | 54.3128204 | -1003909.929 |
| A_R1Ph_R2Ph_XNMs_conf10     | -1004106.45 | -1003872.37 | -1003855.58 | 54.0800144 | -1003909.66  |
| A_R1Ph_R2Ph_XNMs_conf3      | -1004106.45 | -1003872.37 | -1003855.58 | 54.0423638 | -1003909.623 |
| A_R1Ph_R2Ph_XNMs_conf9      | -1004106.55 | -1003872.48 | -1003855.71 | 53.4437199 | -1003909.154 |
| A_R1Ph_R2Ph_XNMs_conf12     | -1004105.21 | -1003870.94 | -1003854.24 | 53.95012   | -1003908.194 |
| A_R1Ph_R2Ph_XNMs_conf14     | -1004105.24 | -1003871.04 | -1003854.34 | 53.0772544 | -1003907.414 |
| A_R1Ph_R2Ph_XNMs_conf11     | -1004104.59 | -1003870.36 | -1003853.68 | 53.4123444 | -1003907.097 |
| A_R1Ph_R2Ph_XNMs_conf1      | -1004104.59 | -1003870.33 | -1003853.67 | 53.0145034 | -1003906.682 |
| A_R1Ph_R2Ph_XNMs_conf2      | -1004104.24 | -1003870.02 | -1003853.3  | 53.3521035 | -1003906.654 |
| B_R1Ph_R2Ph_XNMs            | -1004156.59 | -1003919.34 | -1003904.22 | 48.475728  | -1003952.697 |
| B_R1Ph_R2Ph_XNMs_conf2      | -1004156.59 | -1003919.34 | -1003904.22 | 48.4751005 | -1003952.696 |
| B_R1Ph_R2Ph_XNMs_conf1      | -1004150.96 | -1003913.79 | -1003898.63 | 49.0969623 | -1003947.727 |
| B_R1Ph_R2Ph_XNMs_conf1_prim | -1004150.96 | -1003913.79 | -1003898.63 | 49.0913147 | -1003947.722 |
| C_R1Ph_R2Ph_XNMs_conf1      | -1004165.29 | -1003927.56 | -1003912.55 | 47.6574558 | -1003960.203 |
| C_R1Ph_R2Ph_XNMs_conf3      | -1004165.29 | -1003927.56 | -1003912.55 | 47.6568283 | -1003960.202 |
| C_R1Ph_R2Ph_XNMs_conf2      | -1004165.29 | -1003927.56 | -1003912.54 | 47.6574558 | -1003960.202 |
| C_R1Ph_R2Ph_XNMs            | -1004164.18 | -1003926.37 | -1003911.3  | 48.3257533 | -1003959.625 |
| D_R1Ph_R2Ph_XNMs_1          | -1004185.26 | -1003947.17 | -1003932.08 | 48.8698039 | -1003980.955 |
| D_R1Ph_R2Ph_XNMs            | -1004185.26 | -1003947.17 | -1003932.08 | 48.8666664 | -1003980.952 |
| D_R1Ph_R2Ph_XNMs_5          | -1004185.26 | -1003947.17 | -1003932.08 | 48.8660389 | -1003980.951 |
| D_R1Ph_R2Ph_XNMs_4          | -1004185.26 | -1003947.17 | -1003932.08 | 48.8654114 | -1003980.95  |
| D_R1Ph_R2Ph_XNMs_2          | -1004184.7  | -1003946.58 | -1003931.52 | 48.7223392 | -1003980.238 |
| D_R1Ph_R2Ph_XNMs_3          | -1004180.35 | -1003942.31 | -1003927.08 | 49.4728404 | -1003976.556 |

|                         |             |             |             |            |              |
|-------------------------|-------------|-------------|-------------|------------|--------------|
| E_R1Ph_R2Ph_XNMs_conf7  | -1004166.88 | -1003929.57 | -1003914.28 | 49.2576047 | -1003963.534 |
| E_R1Ph_R2Ph_XNMs_conf9  | -1004166.88 | -1003929.57 | -1003914.28 | 49.2563497 | -1003963.533 |
| E_R1Ph_R2Ph_XNMs        | -1004166.88 | -1003929.57 | -1003914.28 | 49.2519571 | -1003963.528 |
| E_R1Ph_R2Ph_XNMs_conf10 | -1004166.88 | -1003929.57 | -1003914.28 | 49.2507021 | -1003963.526 |
| E_R1Ph_R2Ph_XNMs_conf5  | -1004166.88 | -1003929.57 | -1003914.28 | 49.244427  | -1003963.52  |
| E_R1Ph_R2Ph_XNMs_conf6  | -1004166.88 | -1003929.57 | -1003914.27 | 49.2387794 | -1003963.513 |
| E_R1Ph_R2Ph_XNMs_conf1  | -1004166.3  | -1003929.1  | -1003913.82 | 48.975853  | -1003962.794 |
| E_R1Ph_R2Ph_XNMs_conf2  | -1004166.3  | -1003929.1  | -1003913.82 | 48.9739705 | -1003962.792 |
| E_R1Ph_R2Ph_XNMs_conf4  | -1004166.3  | -1003929.1  | -1003913.82 | 48.9727155 | -1003962.791 |
| E_R1Ph_R2Ph_XNMs_conf8  | -1004164.54 | -1003927.33 | -1003911.98 | 49.4822531 | -1003961.461 |
| E_R1Ph_R2Ph_XNMs_conf3  | -1004164.54 | -1003927.33 | -1003911.98 | 49.479743  | -1003961.458 |
| TS_A_B_R1Ph_R2Ph_XNMs   | -1004086.07 | -1003852.2  | -1003836.21 | 50.94435   | -1003887.149 |
| TS_B_C_R1Ph_R2Ph_XNMs   | -1004129.16 | -1003893.09 | -1003878.24 | 47.6731435 | -1003925.917 |
| TS_B_D_R1Ph_R2Ph_XNMs   | -1004125.24 | -1003889.26 | -1003874.37 | 47.8017829 | -1003922.175 |
| TS_B_E_R1Ph_R2Ph_XNMs   | -1004129.65 | -1003893.79 | -1003878.78 | 47.8952818 | -1003926.676 |

A\_R1Ph\_R2Ph\_XNMs\_conf10  
SCF Energy: -1600.14569811  
Num. Imaginary Frequencies: 0

|   |           |           |           |
|---|-----------|-----------|-----------|
| C | 0.311950  | -1.280817 | 0.933156  |
| N | -0.741222 | -2.041944 | 0.819677  |
| N | -1.663241 | -2.696127 | 0.702990  |
| C | 0.065487  | 0.098001  | 1.415184  |
| C | -0.615961 | 0.305952  | 2.620813  |
| C | 0.473978  | 1.218764  | 0.666552  |
| C | -0.858915 | 1.589148  | 3.100741  |
| H | -0.938621 | -0.559588 | 3.193023  |
| C | 0.233654  | 2.503016  | 1.156249  |
| C | -0.415612 | 2.691974  | 2.372409  |
| H | -1.380654 | 1.725766  | 4.042082  |
| H | 0.538357  | 3.361330  | 0.567233  |
| H | -0.592475 | 3.698598  | 2.736035  |
| C | 1.623340  | -1.844520 | 0.590298  |
| C | 2.786123  | -1.185334 | 1.014349  |
| C | 1.747061  | -3.023917 | -0.162662 |
| C | 4.040535  | -1.690307 | 0.686275  |
| H | 2.706352  | -0.269885 | 1.593001  |
| C | 3.005565  | -3.528951 | -0.475989 |
| H | 0.859055  | -3.545061 | -0.511678 |
| C | 4.159263  | -2.864220 | -0.057294 |
| H | 4.928994  | -1.158606 | 1.012806  |
| H | 3.083503  | -4.441381 | -1.059013 |
| H | 5.138729  | -3.255798 | -0.311502 |
| N | 1.078402  | 1.054307  | -0.616534 |
| C | 0.462058  | 0.233799  | -1.685729 |
| H | 0.692053  | 0.697447  | -2.650490 |
| H | 0.899851  | -0.771052 | -1.698050 |
| C | -0.987528 | 0.152554  | -1.512986 |
| C | -2.174601 | 0.052704  | -1.302129 |
| C | -3.566589 | -0.063503 | -0.969201 |
| C | -3.970527 | 0.158746  | 0.356853  |
| C | -4.520452 | -0.400876 | -1.939652 |
| C | -5.313387 | 0.043188  | 0.703006  |
| H | -3.224318 | 0.421414  | 1.102315  |
| C | -5.861601 | -0.515454 | -1.583721 |
| H | -4.204371 | -0.572212 | -2.963508 |

|   |           |           |           |
|---|-----------|-----------|-----------|
| C | -6.260714 | -0.294321 | -0.265018 |
| H | -5.621010 | 0.215813  | 1.729330  |
| H | -6.596494 | -0.778182 | -2.337781 |
| H | -7.307214 | -0.384699 | 0.007832  |
| S | 2.596837  | 1.651461  | -0.946958 |
| O | 3.242103  | 0.699549  | -1.846480 |
| C | 2.332767  | 3.149584  | -1.876068 |
| O | 3.219714  | 2.006354  | 0.322715  |
| H | 1.719273  | 2.917747  | -2.747112 |
| H | 1.844772  | 3.880265  | -1.232538 |
| H | 3.317363  | 3.502582  | -2.186080 |

A\_R1Ph\_R2Ph\_XNMs\_conf11  
SCF Energy: -1600.14273243  
Num. Imaginary Frequencies: 0

|   |           |           |           |
|---|-----------|-----------|-----------|
| C | 0.181642  | 0.029262  | 1.428658  |
| N | 1.428424  | -0.081951 | 1.798102  |
| N | 2.516977  | -0.162689 | 2.117856  |
| C | -0.549069 | -1.241269 | 1.252987  |
| C | -0.349603 | -2.284540 | 2.171569  |
| C | -1.395236 | -1.485158 | 0.151960  |
| C | -0.960268 | -3.522971 | 2.010947  |
| H | 0.290110  | -2.109585 | 3.032098  |
| C | -1.997817 | -2.733172 | -0.007249 |
| C | -1.794043 | -3.752439 | 0.917758  |
| H | -0.788870 | -4.305488 | 2.742824  |
| H | -2.615724 | -2.915852 | -0.880947 |
| H | -2.274138 | -4.715084 | 0.779821  |
| C | -0.326150 | 1.403052  | 1.251014  |
| C | -1.629672 | 1.721438  | 1.649347  |
| C | 0.493655  | 2.409437  | 0.723295  |
| C | -2.107437 | 3.021077  | 1.509079  |
| H | -2.271069 | 0.944954  | 2.053624  |
| C | 0.016986  | 3.712418  | 0.600442  |
| H | 1.502490  | 2.164624  | 0.398640  |
| C | -1.286741 | 4.022631  | 0.988846  |
| H | -3.124701 | 3.251705  | 1.810431  |
| H | 0.661372  | 4.483231  | 0.188968  |
| H | -1.660948 | 5.035923  | 0.883516  |

|   |           |           |           |
|---|-----------|-----------|-----------|
| N | -1.563230 | -0.467625 | -0.850648 |
| C | -0.712580 | -0.565337 | -2.053945 |
| H | -0.883596 | -1.522119 | -2.566429 |
| H | -0.997942 | 0.246704  | -2.729036 |
| C | 0.709933  | -0.440543 | -1.730317 |
| C | 1.891012  | -0.351659 | -1.483420 |
| C | 3.284837  | -0.233195 | -1.156072 |
| C | 3.911030  | 1.021932  | -1.178614 |
| C | 4.021803  | -1.369644 | -0.790401 |
| C | 5.253343  | 1.136880  | -0.827790 |
| H | 3.340173  | 1.897925  | -1.471033 |
| C | 5.363214  | -1.247012 | -0.442809 |
| H | 3.532385  | -2.338267 | -0.772363 |
| C | 5.980262  | 0.005101  | -0.456904 |
| H | 5.731887  | 2.110736  | -0.843691 |
| H | 5.927654  | -2.128599 | -0.156565 |
| H | 7.025995  | 0.097827  | -0.181762 |
| S | -3.068486 | 0.220457  | -1.085723 |
| O | -2.837358 | 1.522917  | -1.703723 |
| C | -3.939544 | -0.764169 | -2.295126 |
| O | -3.784617 | 0.116938  | 0.179530  |
| H | -4.178794 | -1.734273 | -1.862471 |
| H | -4.853747 | -0.215777 | -2.527333 |
| H | -3.323516 | -0.861588 | -3.189874 |

A\_R1Ph\_R2Ph\_XNMs\_conf13  
 SCF Energy: -1600.14582975  
 Num. Imaginary Frequencies: 0

|   |           |           |           |
|---|-----------|-----------|-----------|
| C | -2.191968 | 1.595481  | -0.615689 |
| N | -2.213311 | 2.534221  | -1.523355 |
| N | -2.236306 | 3.340294  | -2.324508 |
| C | -1.223656 | 1.777209  | 0.486978  |
| C | -1.065576 | 3.034393  | 1.086201  |
| C | -0.417056 | 0.712574  | 0.937465  |
| C | -0.154021 | 3.231801  | 2.117829  |
| H | -1.685887 | 3.859437  | 0.747190  |
| C | 0.493445  | 0.916452  | 1.973746  |
| C | 0.620130  | 2.165953  | 2.573570  |
| H | -0.057460 | 4.212501  | 2.571582  |
| H | 1.123505  | 0.096408  | 2.300163  |
| H | 1.331507  | 2.306750  | 3.380247  |
| C | -3.189099 | 0.516130  | -0.738154 |
| C | -3.636806 | -0.144546 | 0.413897  |
| C | -3.715079 | 0.146188  | -1.983694 |
| C | -4.584899 | -1.157449 | 0.318690  |
| H | -3.228197 | 0.126535  | 1.382910  |
| C | -4.674256 | -0.860615 | -2.071130 |
| H | -3.368955 | 0.638469  | -2.889235 |
| C | -5.112023 | -1.518754 | -0.922201 |
| H | -4.911204 | -1.667562 | 1.219797  |
| H | -5.071662 | -1.136688 | -3.042866 |
| H | -5.852502 | -2.308763 | -0.993454 |
| N | -0.504910 | -0.542473 | 0.256167  |
| C | 0.091009  | -0.628538 | -1.085484 |
| H | -0.218628 | -1.574899 | -1.536368 |
| H | -0.342332 | 0.171851  | -1.694388 |
| C | 1.555977  | -0.507513 | -1.049324 |
| C | 2.757648  | -0.393039 | -0.954370 |
| C | 4.181901  | -0.241386 | -0.838942 |
| C | 4.713925  | 0.737446  | 0.014572  |
| C | 5.047549  | -1.066419 | -1.572576 |

|   |           |           |           |
|---|-----------|-----------|-----------|
| C | 6.092991  | 0.885228  | 0.130192  |
| H | 4.039893  | 1.374613  | 0.578660  |
| C | 6.425522  | -0.910371 | -1.452624 |
| H | 4.633234  | -1.822350 | -2.231769 |
| C | 6.950807  | 0.063466  | -0.602292 |
| H | 6.498685  | 1.643977  | 0.791530  |
| H | 7.090206  | -1.550407 | -2.023756 |
| H | 8.025680  | 0.182057  | -0.511061 |
| S | -0.775885 | -1.967458 | 1.073857  |
| O | -1.419741 | -2.873128 | 0.126737  |
| C | 0.811121  | -2.688072 | 1.455765  |
| O | -1.441646 | -1.611870 | 2.321678  |
| H | 1.372719  | -2.800107 | 0.527372  |
| H | 1.339127  | -2.048022 | 2.160833  |
| H | 0.603711  | -3.662482 | 1.900900  |

A\_R1Ph\_R2Ph\_XNMs\_conf14  
 SCF Energy: -1600.14376044  
 Num. Imaginary Frequencies: 0

|   |           |           |           |
|---|-----------|-----------|-----------|
| C | 0.558231  | 1.727343  | 0.226387  |
| N | -0.105240 | 2.544949  | -0.538848 |
| N | -0.720920 | 3.233410  | -1.203613 |
| C | 2.016907  | 1.609881  | -0.027758 |
| C | 2.855925  | 2.709754  | 0.183178  |
| C | 2.582020  | 0.400536  | -0.473265 |
| C | 4.231182  | 2.611688  | -0.008613 |
| H | 2.416335  | 3.642395  | 0.524498  |
| C | 3.961741  | 0.303687  | -0.656139 |
| C | 4.785804  | 1.399315  | -0.413784 |
| H | 4.866155  | 3.473095  | 0.169086  |
| H | 4.394111  | -0.627640 | -1.004526 |
| H | 5.856869  | 1.306868  | -0.559163 |
| C | -0.177086 | 1.029171  | 1.287860  |
| C | -1.566453 | 1.167802  | 1.433613  |
| C | 0.515254  | 0.194732  | 2.176410  |
| C | -2.244588 | 0.475866  | 2.431226  |
| H | -2.129610 | 1.800945  | 0.753039  |
| C | -0.171458 | -0.500219 | 3.168933  |
| H | 1.589381  | 0.072312  | 2.081855  |
| C | -1.553232 | -0.366656 | 3.303613  |
| H | -3.321641 | 0.588029  | 2.516179  |
| H | 0.381816  | -1.152922 | 3.837414  |
| H | -2.085341 | -0.912650 | 4.075828  |
| N | 1.717801  | -0.696399 | -0.786131 |
| C | 0.815028  | -0.597584 | -1.949925 |
| H | 1.140935  | 0.275297  | -2.522409 |
| H | 0.962334  | -1.466693 | -2.601793 |
| C | -0.611890 | -0.478293 | -1.627724 |
| C | -1.798166 | -0.387113 | -1.407881 |
| C | -3.198078 | -0.291789 | -1.101290 |
| C | -3.933821 | 0.840265  | -1.482248 |
| C | -3.831458 | -1.323715 | -0.392582 |
| C | -5.284540 | 0.935380  | -1.158303 |
| H | -3.437569 | 1.639875  | -2.024042 |
| C | -5.181982 | -1.221176 | -0.072013 |
| H | -3.254042 | -2.191674 | -0.090385 |
| C | -5.910896 | -0.093303 | -0.452908 |
| H | -5.848067 | 1.814310  | -1.454680 |
| H | -5.665860 | -2.021375 | 0.478917  |
| H | -6.963575 | -0.015918 | -0.200171 |
| S | 1.918494  | -2.192392 | -0.088744 |

|   |          |           |           |
|---|----------|-----------|-----------|
| O | 0.600352 | -2.813979 | -0.041410 |
| C | 2.904009 | -3.169976 | -1.210976 |
| O | 2.689808 | -1.993607 | 1.132775  |
| H | 2.416713 | -3.198782 | -2.185502 |
| H | 3.902436 | -2.741201 | -1.277073 |
| H | 2.945247 | -4.172614 | -0.782806 |

SCF Energy: -1600.14982472  
 Num. Imaginary Frequencies: 0

|   |           |           |           |
|---|-----------|-----------|-----------|
| C | 0.523607  | 1.376407  | 0.940928  |
| N | -0.339510 | 2.301641  | 0.639916  |
| N | -1.119284 | 3.086448  | 0.374584  |
| C | 1.922663  | 1.558326  | 0.480258  |
| C | 2.733229  | 2.572498  | 0.999787  |
| C | 2.463991  | 0.679653  | -0.473890 |
| C | 4.062363  | 2.696113  | 0.600461  |
| H | 2.316518  | 3.252433  | 1.736880  |
| C | 3.797143  | 0.796638  | -0.864651 |
| C | 4.599226  | 1.796962  | -0.319923 |
| H | 4.680097  | 3.484882  | 1.016847  |
| H | 4.193946  | 0.109371  | -1.605861 |
| H | 5.636419  | 1.881341  | -0.626673 |
| C | 0.055729  | 0.199758  | 1.682423  |
| C | 0.996217  | -0.651956 | 2.283265  |
| C | -1.309452 | -0.106343 | 1.803146  |
| C | 0.578581  | -1.784138 | 2.978844  |
| H | 2.056203  | -0.436501 | 2.190320  |
| C | -1.718908 | -1.240809 | 2.498028  |
| H | -2.055940 | 0.533661  | 1.340010  |
| C | -0.778862 | -2.088569 | 3.088319  |
| H | 1.321660  | -2.433937 | 3.430709  |
| H | -2.779031 | -1.465114 | 2.570546  |
| H | -1.100907 | -2.974265 | 3.626005  |
| N | 1.599955  | -0.276837 | -1.099935 |
| C | 0.735448  | 0.184446  | -2.201860 |
| H | 1.084185  | 1.177449  | -2.498072 |
| H | 0.877562  | -0.472164 | -3.067767 |
| C | -0.687142 | 0.240813  | -1.835743 |
| C | -1.856803 | 0.272945  | -1.525070 |
| C | -3.235621 | 0.297523  | -1.121704 |
| C | -3.868186 | -0.888945 | -0.719036 |
| C | -3.947828 | 1.505843  | -1.098257 |
| C | -5.194856 | -0.863202 | -0.299421 |
| H | -3.309949 | -1.820294 | -0.731703 |
| C | -5.275923 | 1.522201  | -0.680540 |
| H | -3.450730 | 2.422106  | -1.400196 |
| C | -5.901195 | 0.340666  | -0.280094 |
| H | -5.678130 | -1.783365 | 0.013031  |
| H | -5.822205 | 2.459724  | -0.664204 |
| H | -6.935615 | 0.357853  | 0.047685  |
| S | 1.954421  | -1.905119 | -1.037616 |
| O | 2.929521  | -2.080311 | 0.033417  |
| C | 0.406798  | -2.657346 | -0.583442 |
| O | 2.287943  | -2.385324 | -2.380666 |
| H | 0.085557  | -2.245739 | 0.373889  |
| H | -0.319930 | -2.446861 | -1.369199 |
| H | 0.600389  | -3.729263 | -0.515322 |

A\_R1Ph\_R2Ph\_XNMs\_conf15  
 SCF Energy: -1600.14675982  
 Num. Imaginary Frequencies: 0

|   |           |           |           |
|---|-----------|-----------|-----------|
| C | 1.824248  | 0.612247  | -0.832682 |
| N | 0.628779  | 0.907924  | -1.263608 |
| N | -0.419564 | 1.181097  | -1.607154 |
| C | 2.252799  | -0.799453 | -0.936290 |
| C | 3.512831  | -1.107984 | -1.464488 |
| C | 1.427449  | -1.852957 | -0.512409 |
| C | 3.928927  | -2.429342 | -1.591880 |
| H | 4.159518  | -0.298000 | -1.788962 |
| C | 1.841728  | -3.177725 | -0.646974 |
| C | 3.087697  | -3.469310 | -1.194585 |
| H | 4.905349  | -2.647363 | -2.011739 |
| H | 1.191506  | -3.976973 | -0.303074 |
| H | 3.405868  | -4.501550 | -1.294297 |
| C | 2.644354  | 1.715196  | -0.304875 |
| C | 3.706122  | 1.432561  | 0.569180  |
| C | 2.371497  | 3.053535  | -0.628473 |
| C | 4.478351  | 2.464853  | 1.093861  |
| H | 3.911635  | 0.403572  | 0.847754  |
| C | 3.141847  | 4.081037  | -0.090308 |
| H | 1.560962  | 3.294867  | -1.311064 |
| C | 4.202065  | 3.793722  | 0.769274  |
| H | 5.294248  | 2.228008  | 1.769619  |
| H | 2.916370  | 5.109828  | -0.353244 |
| H | 4.804828  | 4.595640  | 1.182595  |
| N | 0.149062  | -1.543384 | 0.062861  |
| C | -1.017682 | -2.314174 | -0.417151 |
| H | -0.786024 | -2.601714 | -1.445885 |
| H | -1.165184 | -3.226814 | 0.170186  |
| C | -2.242393 | -1.508646 | -0.397799 |
| C | -3.236940 | -0.819549 | -0.376767 |
| C | -4.387966 | 0.039803  | -0.354758 |
| C | -4.280925 | 1.353651  | -0.836817 |
| C | -5.614365 | -0.417957 | 0.149449  |
| C | -5.388998 | 2.195646  | -0.812044 |
| H | -3.328477 | 1.699731  | -1.226303 |
| C | -6.718194 | 0.429871  | 0.166779  |
| H | -5.691992 | -1.433705 | 0.523309  |
| C | -6.608314 | 1.736139  | -0.312149 |
| H | -5.301315 | 3.210998  | -1.184996 |
| H | -7.665215 | 0.070790  | 0.556502  |
| H | -7.470981 | 2.394458  | -0.295795 |
| S | 0.145822  | -1.150330 | 1.708698  |
| O | 1.537539  | -1.091609 | 2.143291  |
| C | -0.530420 | 0.493412  | 1.773858  |
| O | -0.785858 | -2.052923 | 2.383742  |
| H | 0.198247  | 1.173837  | 1.331850  |
| H | -1.476093 | 0.499800  | 1.230861  |
| H | -0.680092 | 0.719223  | 2.830838  |

A\_R1Ph\_R2Ph\_XNMs\_conf17  
 SCF Energy: -1600.14982503  
 Num. Imaginary Frequencies: 0

|   |           |           |           |
|---|-----------|-----------|-----------|
| C | 0.523637  | -1.375468 | -0.942104 |
| N | -0.339756 | -2.300707 | -0.641866 |
| N | -1.119749 | -3.085509 | -0.377166 |
| C | 1.922495  | -1.558036 | -0.481125 |
| C | 2.732948  | -2.572030 | -1.001191 |
| C | 2.463760  | -0.680262 | 0.473884  |

A\_R1Ph\_R2Ph\_XNMs\_conf16

|   |           |           |           |
|---|-----------|-----------|-----------|
| C | 4.061917  | -2.696351 | -0.601551 |
| H | 2.316266  | -3.251260 | -1.738951 |
| C | 3.796766  | -0.797960 | 0.864959  |
| C | 4.598743  | -1.798078 | 0.319712  |
| H | 4.679547  | -3.484977 | -1.018360 |
| H | 4.193524  | -0.111395 | 1.606838  |
| H | 5.635812  | -1.882992 | 0.626733  |
| C | 0.056219  | -0.198251 | -1.682963 |
| C | -1.308842 | 0.108442  | -1.803531 |
| C | 0.997051  | 0.653398  | -2.283363 |
| C | -1.717843 | 1.243451  | -2.497794 |
| H | -2.055572 | -0.531545 | -1.340771 |
| C | 0.579867  | 1.786128  | -2.978320 |
| H | 2.056945  | 0.437411  | -2.190599 |
| C | -0.777457 | 2.091164  | -3.087607 |
| H | -2.777874 | 1.468219  | -2.570203 |
| H | 1.323195  | 2.435865  | -3.429865 |
| H | -1.099149 | 2.977288  | -3.624800 |
| N | 1.599920  | 0.276009  | 1.100552  |
| C | 0.734965  | -0.185777 | 2.201899  |
| H | 1.083781  | -1.178766 | 2.498073  |
| H | 0.876553  | 0.470670  | 3.068011  |
| C | -0.687485 | -0.242278 | 1.835248  |
| C | -1.857129 | -0.274298 | 1.524487  |
| C | -3.235987 | -0.298511 | 1.121230  |
| C | -3.868492 | 0.888308  | 0.719503  |
| C | -3.948358 | -1.506707 | 1.097083  |
| C | -5.195247 | 0.863022  | 0.300140  |
| H | -3.310145 | 1.819571  | 0.732703  |
| C | -5.276540 | -1.522607 | 0.679624  |
| H | -3.451329 | -2.423228 | 1.398302  |
| C | -5.901746 | -0.340732 | 0.280121  |
| H | -5.678464 | 1.783456  | -0.011573 |
| H | -5.822939 | -2.460042 | 0.662752  |
| H | -6.936233 | -0.357561 | -0.047459 |
| S | 1.954515  | 1.904296  | 1.039156  |
| O | 2.930232  | 2.079914  | -0.031241 |
| C | 0.407268  | 2.657013  | 0.584511  |
| O | 2.287302  | 2.383756  | 2.382652  |
| H | 0.600906  | 3.729006  | 0.517754  |
| H | 0.086803  | 2.246486  | -0.373539 |
| H | -0.320110 | 2.445652  | 1.369435  |

A\_R1Ph\_R2Ph\_XNMs\_conf18  
 SCF Energy: -1600.14725613  
 Num. Imaginary Frequencies: 0

|   |           |           |           |
|---|-----------|-----------|-----------|
| C | 1.143994  | -0.937142 | 0.089248  |
| N | 0.308484  | -1.007867 | -0.909231 |
| N | -0.404260 | -1.054040 | -1.794116 |
| C | 0.780244  | -0.040550 | 1.208193  |
| C | 0.873362  | -0.497423 | 2.529099  |
| C | 0.343365  | 1.274252  | 0.983849  |
| C | 0.518598  | 0.324703  | 3.593614  |
| H | 1.215373  | -1.511795 | 2.712420  |
| C | -0.021166 | 2.095024  | 2.049746  |
| C | 0.059154  | 1.620874  | 3.355586  |
| H | 0.589521  | -0.050511 | 4.609218  |
| H | -0.351554 | 3.110855  | 1.853722  |
| H | -0.222268 | 2.263822  | 4.182677  |
| C | 2.354246  | -1.772463 | 0.022831  |
| C | 2.430357  | -2.885780 | -0.828977 |

|   |           |           |           |
|---|-----------|-----------|-----------|
| C | 3.471968  | -1.440784 | 0.804724  |
| C | 3.595422  | -3.644923 | -0.896542 |
| H | 1.573645  | -3.167617 | -1.435292 |
| C | 4.629064  | -2.211861 | 0.739830  |
| H | 3.435708  | -0.567736 | 1.449059  |
| C | 4.699538  | -3.316533 | -0.109898 |
| H | 3.634679  | -4.502800 | -1.560550 |
| H | 5.484376  | -1.939512 | 1.350328  |
| H | 5.604354  | -3.913257 | -0.159251 |
| N | 0.281516  | 1.760174  | -0.365992 |
| C | -0.971084 | 2.393124  | -0.822868 |
| H | -1.167344 | 3.330562  | -0.289352 |
| H | -0.859555 | 2.648031  | -1.880827 |
| C | -2.090570 | 1.463931  | -0.652490 |
| C | -2.999176 | 0.679210  | -0.501321 |
| C | -4.071960 | -0.262862 | -0.337938 |
| C | -3.938995 | -1.567911 | -0.836418 |
| C | -5.254655 | 0.113458  | 0.316183  |
| C | -4.977349 | -2.481352 | -0.678999 |
| H | -3.021597 | -1.852131 | -1.342562 |
| C | -6.289313 | -0.805445 | 0.465935  |
| H | -5.353500 | 1.123342  | 0.700886  |
| C | -6.153274 | -2.102918 | -0.029650 |
| H | -4.869102 | -3.489723 | -1.065280 |
| H | -7.202553 | -0.508506 | 0.971416  |
| H | -6.961576 | -2.817215 | 0.089841  |
| S | 1.695398  | 2.398611  | -1.014192 |
| O | 2.776732  | 2.074699  | -0.091597 |
| C | 1.917314  | 1.463575  | -2.510439 |
| O | 1.454308  | 3.792831  | -1.385584 |
| H | 2.144983  | 0.434538  | -2.230303 |
| H | 1.003614  | 1.524041  | -3.102914 |
| H | 2.753435  | 1.918495  | -3.043111 |

A\_R1Ph\_R2Ph\_XNMs\_conf1  
 SCF Energy: -1600.14272309  
 Num. Imaginary Frequencies: 0

|   |           |           |           |
|---|-----------|-----------|-----------|
| C | 0.224457  | 0.133431  | 1.393155  |
| N | 1.472876  | 0.132557  | 1.775602  |
| N | 2.560140  | 0.147681  | 2.109363  |
| C | -0.398296 | -1.194835 | 1.239202  |
| C | -0.072005 | -2.219558 | 2.143198  |
| C | -1.259137 | -1.513583 | 0.168529  |
| C | -0.570372 | -3.508672 | 1.995199  |
| H | 0.579243  | -1.991572 | 2.982393  |
| C | -1.747151 | -2.812011 | 0.020763  |
| C | -1.416539 | -3.812100 | 0.929845  |
| H | -0.300819 | -4.274038 | 2.715632  |
| H | -2.375116 | -3.046989 | -0.833234 |
| H | -1.808114 | -4.815228 | 0.801081  |
| C | -0.382502 | 1.463707  | 1.176354  |
| C | -1.676393 | 1.726653  | 1.640065  |
| C | 0.342475  | 2.486149  | 0.550966  |
| C | -2.238865 | 2.988186  | 1.468064  |
| H | -2.243361 | 0.936230  | 2.121172  |
| C | -0.217752 | 3.752189  | 0.395677  |
| H | 1.342816  | 2.281055  | 0.176589  |
| C | -1.511914 | 4.006758  | 0.850502  |
| H | -3.247921 | 3.176247  | 1.821954  |
| H | 0.353488  | 4.536604  | -0.091159 |
| H | -1.951798 | 4.990541  | 0.721555  |

|   |           |           |           |
|---|-----------|-----------|-----------|
| N | -1.560255 | -0.513251 | -0.819897 |
| C | -0.760224 | -0.530617 | -2.061927 |
| H | -0.920404 | -1.468599 | -2.611955 |
| H | -1.098792 | 0.302031  | -2.685022 |
| C | 0.667663  | -0.381327 | -1.778115 |
| C | 1.847138  | -0.283512 | -1.527963 |
| C | 3.236132  | -0.165157 | -1.181882 |
| C | 3.952276  | -1.296239 | -0.761720 |
| C | 3.876361  | 1.081858  | -1.233243 |
| C | 5.287844  | -1.176344 | -0.391013 |
| H | 3.451060  | -2.258229 | -0.721120 |
| C | 5.212407  | 1.194154  | -0.858833 |
| H | 3.321431  | 1.953811  | -1.565460 |
| C | 5.918946  | 0.067909  | -0.435167 |
| H | 5.836307  | -2.053563 | -0.063315 |
| H | 5.702176  | 2.161781  | -0.896992 |
| H | 6.959884  | 0.159035  | -0.141885 |
| S | -3.126790 | 0.045770  | -0.974941 |
| O | -3.036999 | 1.350692  | -1.623450 |
| C | -3.986011 | -1.026488 | -2.116505 |
| O | -3.758073 | -0.091044 | 0.331673  |
| H | -4.128687 | -2.001888 | -1.654036 |
| H | -4.949880 | -0.552032 | -2.307295 |
| H | -3.412867 | -1.096909 | -3.042005 |

A\_R1Ph\_R2Ph\_XNMs\_conf2  
 SCF Energy: -1600.14216273  
 Num. Imaginary Frequencies: 0

|   |           |           |           |
|---|-----------|-----------|-----------|
| C | -0.087421 | 1.005801  | 1.003914  |
| N | 1.074831  | 1.592702  | 0.956340  |
| N | 2.082147  | 2.117262  | 0.888847  |
| C | -0.079383 | -0.432364 | 1.360873  |
| C | 0.577734  | -0.868127 | 2.517711  |
| C | -0.676719 | -1.396464 | 0.526276  |
| C | 0.630365  | -2.219968 | 2.849417  |
| H | 1.043620  | -0.131157 | 3.165926  |
| C | -0.625299 | -2.747083 | 0.862743  |
| C | 0.017693  | -3.162943 | 2.026909  |
| H | 1.141733  | -2.533562 | 3.753618  |
| H | -1.070895 | -3.481321 | 0.199219  |
| H | 0.049713  | -4.217384 | 2.279364  |
| C | -1.273443 | 1.835722  | 0.740902  |
| C | -2.510941 | 1.464096  | 1.281825  |
| C | -1.190395 | 3.007935  | -0.026133 |
| C | -3.641141 | 2.243791  | 1.053536  |
| H | -2.588693 | 0.554538  | 1.868682  |
| C | -2.321585 | 3.790791  | -0.239130 |
| H | -0.241445 | 3.303692  | -0.466273 |
| C | -3.553473 | 3.412474  | 0.296901  |
| H | -4.594072 | 1.935075  | 1.472331  |
| H | -2.241248 | 4.694212  | -0.835813 |
| H | -4.435426 | 4.020329  | 0.122913  |
| N | -1.241235 | -0.957109 | -0.718648 |
| C | -0.376122 | -0.955533 | -1.922901 |
| H | -0.340388 | -1.958245 | -2.372707 |
| H | -0.817987 | -0.265923 | -2.647517 |
| C | 0.995967  | -0.558238 | -1.608848 |
| C | 2.154013  | -0.320206 | -1.351080 |
| C | 3.517075  | -0.062046 | -0.979289 |
| C | 3.991948  | -0.532915 | 0.254881  |
| C | 4.371815  | 0.660260  | -1.823411 |

|   |           |           |           |
|---|-----------|-----------|-----------|
| C | 5.304924  | -0.276987 | 0.638092  |
| H | 3.321846  | -1.089993 | 0.904197  |
| C | 5.684916  | 0.908550  | -1.433517 |
| H | 4.000113  | 1.025129  | -2.775421 |
| C | 6.153507  | 0.443338  | -0.204041 |
| H | 5.666595  | -0.640156 | 1.594715  |
| H | 6.343008  | 1.468952  | -2.089699 |
| H | 7.177173  | 0.641470  | 0.096958  |
| S | -2.871493 | -1.141552 | -1.016834 |
| O | -3.246427 | -0.088383 | -1.956123 |
| C | -3.093675 | -2.689657 | -1.878987 |
| O | -3.532751 | -1.248144 | 0.277438  |
| H | -2.534182 | -2.666494 | -2.814199 |
| H | -2.772110 | -3.509007 | -1.237494 |
| H | -4.162413 | -2.764459 | -2.085613 |

A\_R1Ph\_R2Ph\_XNMs\_conf3  
 SCF Energy: -1600.14569818  
 Num. Imaginary Frequencies: 0

|   |           |           |           |
|---|-----------|-----------|-----------|
| C | 0.311870  | -1.280799 | 0.933451  |
| N | -0.741314 | -2.041955 | 0.820246  |
| N | -1.663172 | -2.696387 | 0.703563  |
| C | 0.065524  | 0.098068  | 1.415358  |
| C | -0.615966 | 0.306176  | 2.620942  |
| C | 0.474159  | 1.218731  | 0.666651  |
| C | -0.858798 | 1.589429  | 3.100769  |
| H | -0.938732 | -0.559293 | 3.193201  |
| C | 0.234035  | 2.503045  | 1.156301  |
| C | -0.415276 | 2.692151  | 2.372410  |
| H | -1.380575 | 1.726174  | 4.042071  |
| H | 0.538994  | 3.361298  | 0.567331  |
| H | -0.591983 | 3.698820  | 2.735990  |
| C | 1.623204  | -1.844561 | 0.590480  |
| C | 2.786056  | -1.185221 | 1.014108  |
| C | 1.746806  | -3.024100 | -0.162276 |
| C | 4.040414  | -1.690167 | 0.685792  |
| H | 2.706381  | -0.269674 | 1.592618  |
| C | 3.005260  | -3.529119 | -0.475818 |
| H | 0.858751  | -3.545353 | -0.510999 |
| C | 4.159026  | -2.864223 | -0.057567 |
| H | 4.928923  | -1.158337 | 1.011978  |
| H | 3.083105  | -4.441661 | -1.058678 |
| H | 5.138451  | -3.255784 | -0.311958 |
| N | 1.078543  | 1.054090  | -0.616427 |
| C | 0.462177  | 0.233458  | -1.685509 |
| H | 0.692254  | 0.696928  | -2.650335 |
| H | 0.899896  | -0.771427 | -1.697668 |
| C | -0.987425 | 0.152331  | -1.512830 |
| C | -2.174514 | 0.052549  | -1.302033 |
| C | -3.566546 | -0.063510 | -0.969237 |
| C | -4.520316 | -0.400984 | -1.939745 |
| C | -3.970621 | 0.158961  | 0.356736  |
| C | -5.861515 | -0.515420 | -1.583952 |
| H | -4.204125 | -0.572511 | -2.963534 |
| C | -5.313530 | 0.043544  | 0.702749  |
| H | -3.224476 | 0.421676  | 1.102245  |
| C | -6.260769 | -0.294050 | -0.265331 |
| H | -6.596335 | -0.778224 | -2.338056 |
| H | -5.621262 | 0.216345  | 1.729011  |
| H | -7.307306 | -0.384315 | 0.007411  |
| S | 2.596854  | 1.651441  | -0.947070 |

|   |          |          |           |
|---|----------|----------|-----------|
| O | 3.242333 | 0.699379 | -1.846278 |
| C | 2.332401 | 3.149210 | -1.876644 |
| O | 3.219666 | 2.006841 | 0.322494  |
| H | 1.843742 | 3.879794 | -1.233507 |
| H | 3.316936 | 3.502640 | -2.186357 |
| H | 1.719376 | 2.916845 | -2.747876 |

SCF Energy: -1600.14982465  
 Num. Imaginary Frequencies: 0

|   |           |           |           |
|---|-----------|-----------|-----------|
| C | 0.523990  | 1.376557  | 0.940961  |
| N | -0.338994 | 2.301895  | 0.639866  |
| N | -1.118638 | 3.086828  | 0.374525  |
| C | 1.923008  | 1.558238  | 0.480077  |
| C | 2.733748  | 2.572378  | 0.999397  |
| C | 2.464071  | 0.679483  | -0.474146 |
| C | 4.062790  | 2.695933  | 0.599746  |
| H | 2.317228  | 3.252358  | 1.736557  |
| C | 3.797124  | 0.796440  | -0.865270 |
| C | 4.599373  | 1.796762  | -0.320778 |
| H | 4.680660  | 3.484682  | 1.015964  |
| H | 4.193726  | 0.109137  | -1.606551 |
| H | 5.636486  | 1.881107  | -0.627811 |
| C | 0.055960  | 0.200112  | 1.682661  |
| C | -1.309258 | -0.105780 | 1.803484  |
| C | 0.996357  | -0.651610 | 2.283628  |
| C | -1.718839 | -1.240086 | 2.498549  |
| H | -2.055673 | 0.534266  | 1.340290  |
| C | 0.578594  | -1.783630 | 2.979389  |
| H | 2.056366  | -0.436261 | 2.190672  |
| C | -0.778883 | -2.087883 | 3.088926  |
| H | -2.778988 | -1.464240 | 2.571139  |
| H | 1.321595  | -2.433439 | 3.431369  |
| H | -1.101026 | -2.973452 | 3.626762  |
| N | 1.599865  | -0.277086 | -1.099837 |
| C | 0.735123  | 0.184098  | -2.201631 |
| H | 1.083902  | 1.177005  | -2.498120 |
| H | 0.876954  | -0.472678 | -3.067455 |
| C | -0.687390 | 0.240672  | -1.835246 |
| C | -1.857060 | 0.272918  | -1.524622 |
| C | -3.235958 | 0.297473  | -1.121549 |
| C | -3.868495 | -0.888993 | -0.718812 |
| C | -3.948316 | 1.505712  | -1.098499 |
| C | -5.195265 | -0.863322 | -0.299514 |
| H | -3.310173 | -1.820296 | -0.731206 |
| C | -5.276512 | 1.522001  | -0.681094 |
| H | -3.451267 | 2.421972  | -1.400521 |
| C | -5.901745 | 0.340472  | -0.280568 |
| H | -5.678512 | -1.783486 | 0.012983  |
| H | -5.822902 | 2.459467  | -0.665074 |
| H | -6.936244 | 0.357603  | 0.046963  |
| S | 1.954421  | -1.905366 | -1.037566 |
| O | 2.929720  | -2.080568 | 0.033282  |
| C | 0.406870  | -2.657563 | -0.583117 |
| O | 2.287720  | -2.385578 | -2.380670 |
| H | 0.085809  | -2.245904 | 0.374253  |
| H | -0.319977 | -2.447081 | -1.368768 |
| H | 0.600435  | -3.729483 | -0.514998 |

A\_R1Ph\_R2Ph\_XNMs\_conf4  
 SCF Energy: -1600.14804986  
 Num. Imaginary Frequencies: 0

|   |           |           |           |
|---|-----------|-----------|-----------|
| C | -0.134459 | 1.024541  | 0.947479  |
| N | 1.000414  | 1.641855  | 0.789052  |
| N | 1.981742  | 2.197165  | 0.635327  |
| C | -0.085817 | -0.398183 | 1.361626  |
| C | 0.520361  | -0.779604 | 2.563304  |
| C | -0.646297 | -1.394645 | 0.545646  |
| C | 0.554151  | -2.117452 | 2.952166  |
| H | 0.957449  | -0.014447 | 3.198621  |
| C | -0.625051 | -2.730354 | 0.940304  |
| C | -0.032421 | -3.093534 | 2.148047  |
| H | 1.027210  | -2.394627 | 3.888562  |
| H | -1.060968 | -3.484656 | 0.290278  |
| H | -0.020145 | -4.134710 | 2.452280  |
| C | -1.371703 | 1.786051  | 0.730966  |
| C | -1.397828 | 2.947576  | -0.057720 |
| C | -2.561953 | 1.347042  | 1.330406  |
| C | -2.586297 | 3.650212  | -0.238362 |
| H | -0.489565 | 3.296109  | -0.542349 |
| C | -3.748155 | 2.051393  | 1.140418  |
| H | -2.559422 | 0.443933  | 1.932410  |
| C | -3.768801 | 3.206190  | 0.357182  |
| H | -2.589335 | 4.543649  | -0.855001 |
| H | -4.660369 | 1.692226  | 1.606711  |
| H | -4.694531 | 3.752686  | 0.210125  |
| N | -1.127019 | -1.016619 | -0.758959 |
| C | -0.204821 | -1.350136 | -1.874190 |
| H | -0.168219 | -2.435824 | -2.030072 |
| H | -0.589537 | -0.897407 | -2.792461 |
| C | 1.140331  | -0.847156 | -1.593106 |
| C | 2.263847  | -0.491199 | -1.318506 |
| C | 3.586362  | -0.090324 | -0.927097 |
| C | 4.428340  | 0.592956  | -1.815541 |
| C | 4.031834  | -0.376581 | 0.372886  |
| C | 5.699110  | 0.985563  | -1.404342 |
| H | 4.079708  | 0.814531  | -2.819027 |
| C | 5.302176  | 0.022696  | 0.776785  |
| H | 3.372084  | -0.905119 | 1.055680  |
| C | 6.137633  | 0.703926  | -0.109782 |
| H | 6.347445  | 1.514814  | -2.095178 |
| H | 5.640711  | -0.197796 | 1.784027  |
| H | 7.127987  | 1.014460  | 0.207323  |
| S | -2.743180 | -1.332609 | -1.112230 |
| O | -3.451815 | -1.439594 | 0.157930  |
| C | -3.255452 | 0.146821  | -1.955529 |
| O | -2.823262 | -2.444110 | -2.063101 |
| H | -3.150674 | 0.987444  | -1.269021 |
| H | -2.637115 | 0.275093  | -2.844181 |
| H | -4.297702 | -0.010566 | -2.237874 |

A\_R1Ph\_R2Ph\_XNMs\_conf6  
 SCF Energy: -1600.14804993  
 Num. Imaginary Frequencies: 0

|   |           |           |          |
|---|-----------|-----------|----------|
| C | -0.134660 | 1.024326  | 0.947374 |
| N | 1.000295  | 1.641457  | 0.788855 |
| N | 1.981659  | 2.196688  | 0.635056 |
| C | -0.086266 | -0.398327 | 1.361799 |
| C | 0.519447  | -0.779569 | 2.563766 |
| C | -0.646626 | -1.394876 | 0.545847 |

A\_R1Ph\_R2Ph\_XNMs\_conf5

|   |           |           |           |
|---|-----------|-----------|-----------|
| C | 0.552897  | -2.117336 | 2.952935  |
| H | 0.956440  | -0.014335 | 3.199056  |
| C | -0.625740 | -2.730499 | 0.940822  |
| C | -0.033573 | -3.093500 | 2.148844  |
| H | 1.025617  | -2.394380 | 3.889541  |
| H | -1.061562 | -3.484877 | 0.290821  |
| H | -0.021570 | -4.134610 | 2.453316  |
| C | -1.371778 | 1.786055  | 0.730938  |
| C | -1.397691 | 2.947727  | -0.057540 |
| C | -2.562136 | 1.347094  | 1.330208  |
| C | -2.586058 | 3.650525  | -0.238188 |
| H | -0.489344 | 3.296249  | -0.542016 |
| C | -3.748230 | 2.051633  | 1.140236  |
| H | -2.559782 | 0.443876  | 1.932048  |
| C | -3.768672 | 3.206546  | 0.357171  |
| H | -2.588934 | 4.544062  | -0.854684 |
| H | -4.660529 | 1.692505  | 1.606395  |
| H | -4.694325 | 3.753171  | 0.210113  |
| N | -1.126742 | -1.017118 | -0.759059 |
| C | -0.204262 | -1.351398 | -1.873817 |
| H | -0.167598 | -2.437196 | -2.028903 |
| H | -0.588784 | -0.899416 | -2.792535 |
| C | 1.140807  | -0.848157 | -1.592780 |
| C | 2.264207  | -0.491838 | -1.318170 |
| C | 3.586633  | -0.090552 | -0.926832 |
| C | 4.428430  | 0.592785  | -1.815405 |
| C | 4.032215  | -0.376494 | 0.373181  |
| C | 5.699126  | 0.985741  | -1.404308 |
| H | 4.079719  | 0.814141  | -2.818912 |
| C | 5.302474  | 0.023141  | 0.776981  |
| H | 3.372618  | -0.905070 | 1.056083  |
| C | 6.137750  | 0.704415  | -0.109718 |
| H | 6.347314  | 1.515037  | -2.095246 |
| H | 5.641089  | -0.197108 | 1.784248  |
| H | 7.128044  | 1.015224  | 0.207307  |
| S | -2.742931 | -1.332300 | -1.112875 |
| O | -3.452018 | -1.439242 | 0.157034  |
| C | -3.254185 | 0.147572  | -1.956040 |
| O | -2.823193 | -2.443547 | -2.064020 |
| H | -4.296155 | -0.009511 | -2.239575 |
| H | -3.149989 | 0.987845  | -1.269018 |
| H | -2.634832 | 0.276232  | -2.843938 |

A\_R1Ph\_R2Ph\_XNMs\_conf7  
 SCF Energy: -1600.14617001  
 Num. Imaginary Frequencies: 0

|   |           |           |           |
|---|-----------|-----------|-----------|
| C | 2.146443  | 1.613468  | 0.610033  |
| N | 2.137348  | 2.446232  | 1.612191  |
| N | 2.135428  | 3.164634  | 2.494383  |
| C | 1.049473  | 1.726999  | -0.378628 |
| C | 0.762476  | 2.942142  | -1.010662 |
| C | 0.281264  | 0.596951  | -0.706420 |
| C | -0.248387 | 3.025896  | -1.964828 |
| H | 1.354490  | 3.818707  | -0.763458 |
| C | -0.723524 | 0.678995  | -1.669350 |
| C | -0.981253 | 1.889859  | -2.307389 |
| H | -0.453477 | 3.974331  | -2.450322 |
| H | -1.313192 | -0.204156 | -1.897675 |
| H | -1.763010 | 1.947567  | -3.057532 |
| C | 3.285500  | 0.689936  | 0.483172  |
| C | 3.641103  | 0.212114  | -0.787641 |

|   |           |           |           |
|---|-----------|-----------|-----------|
| C | 4.036597  | 0.284037  | 1.596186  |
| C | 4.726547  | -0.646559 | -0.938301 |
| H | 3.058972  | 0.506204  | -1.655783 |
| C | 5.122741  | -0.574095 | 1.437961  |
| H | 3.767021  | 0.631387  | 2.590279  |
| C | 5.474432  | -1.043850 | 0.171599  |
| H | 4.985344  | -1.008330 | -1.928593 |
| H | 5.691589  | -0.881064 | 2.310033  |
| H | 6.319048  | -1.714284 | 0.051804  |
| N | 0.493149  | -0.603067 | 0.051571  |
| C | -0.255008 | -0.684918 | 1.320814  |
| H | -0.002974 | -1.622343 | 1.823064  |
| H | 0.111046  | 0.127057  | 1.958448  |
| C | -1.709192 | -0.576856 | 1.146517  |
| C | -2.896845 | -0.444108 | 0.955929  |
| C | -4.300815 | -0.269748 | 0.706686  |
| C | -4.734219 | 0.766372  | -0.135072 |
| C | -5.243816 | -1.127332 | 1.292349  |
| C | -6.092440 | 0.938450  | -0.385317 |
| H | -3.999545 | 1.426480  | -0.586148 |
| C | -6.600606 | -0.946209 | 1.039370  |
| H | -4.905459 | -1.929192 | 1.940484  |
| C | -7.027704 | 0.084556  | 0.201173  |
| H | -6.421569 | 1.740455  | -1.038180 |
| H | -7.325582 | -1.612301 | 1.495961  |
| H | -8.086257 | 0.221624  | 0.004989  |
| S | 0.741448  | -2.046013 | -0.762772 |
| O | 1.262798  | -1.694213 | -2.079729 |
| C | 2.027448  | -2.820232 | 0.194054  |
| O | -0.448298 | -2.893279 | -0.673503 |
| H | 2.891273  | -2.155850 | 0.212265  |
| H | 1.653405  | -3.023229 | 1.197242  |
| H | 2.256947  | -3.756727 | -0.317091 |

A\_R1Ph\_R2Ph\_XNMs\_conf8  
 SCF Energy: -1600.14603714  
 Num. Imaginary Frequencies: 0

|   |           |           |           |
|---|-----------|-----------|-----------|
| C | -2.181817 | 1.686241  | -0.323093 |
| N | -2.180349 | 2.663699  | -1.184266 |
| N | -2.186823 | 3.508958  | -1.945993 |
| C | -1.084368 | 1.650493  | 0.671421  |
| C | -0.824831 | 2.741544  | 1.508006  |
| C | -0.291435 | 0.497341  | 0.797471  |
| C | 0.184548  | 2.678131  | 2.465426  |
| H | -1.436338 | 3.634556  | 1.415632  |
| C | 0.711698  | 0.430681  | 1.763197  |
| C | 0.942493  | 1.515958  | 2.605131  |
| H | 0.369518  | 3.530721  | 3.110521  |
| H | 1.320397  | -0.465992 | 1.835486  |
| H | 1.723642  | 1.458406  | 3.355688  |
| C | -3.309715 | 0.741458  | -0.343192 |
| C | -4.067375 | 0.517691  | -1.502428 |
| C | -3.647190 | 0.053231  | 0.832661  |
| C | -5.140882 | -0.370027 | -1.481935 |
| H | -3.812084 | 1.030754  | -2.426071 |
| C | -4.720756 | -0.833273 | 0.845656  |
| H | -3.061103 | 0.206970  | 1.733736  |
| C | -5.474206 | -1.050054 | -0.309390 |
| H | -5.714561 | -0.534623 | -2.388641 |
| H | -4.965980 | -1.358582 | 1.763503  |
| H | -6.309032 | -1.742974 | -0.297217 |



|   |           |           |           |
|---|-----------|-----------|-----------|
| N | -0.477689 | -0.554592 | -0.160925 |
| C | 0.270045  | -0.398736 | -1.423235 |
| H | 0.025520  | -1.234401 | -2.084569 |
| H | -0.102393 | 0.510167  | -1.907039 |
| C | 1.723678  | -0.312747 | -1.231675 |
| C | 2.911518  | -0.217945 | -1.020208 |
| C | 4.318639  | -0.130588 | -0.743878 |
| C | 5.108938  | 0.849153  | -1.363334 |
| C | 4.909043  | -1.028503 | 0.159053  |
| C | 6.470006  | 0.926130  | -1.082059 |
| H | 4.649614  | 1.542787  | -2.060164 |
| C | 6.269976  | -0.942135 | 0.437634  |
| H | 4.293654  | -1.785920 | 0.634383  |
| C | 7.052855  | 0.033000  | -0.181860 |
| H | 7.076277  | 1.685558  | -1.565205 |
| H | 6.720332  | -1.638196 | 1.137938  |
| H | 8.114058  | 0.096859  | 0.036290  |
| S | -0.705031 | -2.123785 | 0.379579  |
| O | -1.204777 | -2.025827 | 1.747135  |
| C | -2.003381 | -2.721945 | -0.681250 |
| O | 0.488933  | -2.927713 | 0.115795  |
| H | -2.210984 | -3.742056 | -0.353774 |
| H | -2.874536 | -2.078835 | -0.555603 |
| H | -1.649630 | -2.723377 | -1.712040 |

A\_R1Ph\_R2Ph\_XNMs\_conf9  
 SCF Energy: -1600.14584955  
 Num. Imaginary Frequencies: 0

|   |           |           |           |
|---|-----------|-----------|-----------|
| C | -0.374885 | 1.312333  | 0.830585  |
| N | 0.610593  | 2.128054  | 0.581001  |
| N | 1.475574  | 2.830454  | 0.356244  |
| C | -0.022947 | -0.022892 | 1.364828  |
| C | 0.704470  | -0.165867 | 2.550251  |
| C | -0.412291 | -1.176326 | 0.661447  |
| C | 1.010952  | -1.429701 | 3.049523  |
| H | 1.013480  | 0.726090  | 3.088116  |
| C | -0.109103 | -2.440719 | 1.164268  |
| C | 0.587994  | -2.567724 | 2.363709  |
| H | 1.569483  | -1.524713 | 3.974881  |
| H | -0.401961 | -3.321086 | 0.600546  |
| H | 0.818655  | -3.555745 | 2.747836  |
| C | -1.749708 | 1.758184  | 0.568210  |
| C | -2.810253 | 1.141573  | 1.252081  |
| C | -2.036800 | 2.784012  | -0.345565 |
| C | -4.122098 | 1.552534  | 1.034471  |
| H | -2.602281 | 0.336141  | 1.950427  |
| C | -3.352642 | 3.190657  | -0.557676 |
| H | -1.230620 | 3.263685  | -0.895397 |
| C | -4.401668 | 2.579588  | 0.130444  |
| H | -4.929099 | 1.064590  | 1.572198  |
| H | -3.557281 | 3.985279  | -1.268291 |
| H | -5.425166 | 2.897675  | -0.038080 |
| N | -1.050031 | -1.026370 | -0.606527 |
| C | -0.355009 | -0.402956 | -1.757451 |
| H | -0.526592 | -1.027185 | -2.642304 |
| H | -0.778454 | 0.592877  | -1.949267 |
| C | 1.082101  | -0.275936 | -1.526116 |
| C | 2.256128  | -0.117673 | -1.282392 |
| C | 3.632850  | 0.069551  | -0.920157 |
| C | 4.017333  | -0.107840 | 0.418173  |
| C | 4.590625  | 0.432842  | -1.877546 |

|   |           |           |           |
|---|-----------|-----------|-----------|
| C | 5.345874  | 0.076748  | 0.789246  |
| H | 3.267998  | -0.391225 | 1.152509  |
| C | 5.917047  | 0.615911  | -1.496577 |
| H | 4.289156  | 0.569191  | -2.911015 |
| C | 6.297342  | 0.438782  | -0.165622 |
| H | 5.639112  | -0.062273 | 1.824847  |
| H | 6.655260  | 0.897306  | -2.240586 |
| H | 7.332611  | 0.582031  | 0.126720  |
| S | -2.446904 | -1.860093 | -0.960860 |
| O | -3.059831 | -2.217301 | 0.314128  |
| C | -3.443914 | -0.642560 | -1.793486 |
| O | -2.167062 | -2.924104 | -1.926865 |
| H | -3.559315 | 0.222781  | -1.140168 |
| H | -2.966271 | -0.378016 | -2.736954 |
| H | -4.404456 | -1.124763 | -1.983273 |

A\_R1Ph\_R2Ph\_XNMs  
 SCF Energy: -1600.14728117  
 Num. Imaginary Frequencies: 0

|   |           |           |           |
|---|-----------|-----------|-----------|
| C | 0.760724  | -1.013490 | -0.152145 |
| N | 0.130109  | -0.656149 | -1.239078 |
| N | -0.411062 | -0.377983 | -2.197053 |
| C | 0.678405  | -0.145831 | 1.034754  |
| C | 0.624404  | -0.737691 | 2.307947  |
| C | 0.645495  | 1.258976  | 0.965275  |
| C | 0.529223  | 0.032755  | 3.460405  |
| H | 0.641329  | -1.820615 | 2.383216  |
| C | 0.529894  | 2.029234  | 2.123450  |
| C | 0.473832  | 1.424694  | 3.374247  |
| H | 0.481385  | -0.456161 | 4.427970  |
| H | 0.484812  | 3.111831  | 2.038446  |
| H | 0.388117  | 2.031265  | 4.269163  |
| C | 1.516727  | -2.278869 | -0.225361 |
| C | 1.130580  | -3.303692 | -1.102221 |
| C | 2.659407  | -2.465176 | 0.567982  |
| C | 1.868415  | -4.481746 | -1.184265 |
| H | 0.244093  | -3.183766 | -1.719446 |
| C | 3.385307  | -3.650345 | 0.491372  |
| H | 2.985452  | -1.672969 | 1.234973  |
| C | 2.996274  | -4.664668 | -0.384636 |
| H | 1.553190  | -5.262349 | -1.869577 |
| H | 4.267916  | -3.775201 | 1.111026  |
| H | 3.567197  | -5.585438 | -0.444836 |
| N | 0.690830  | 1.904570  | -0.319033 |
| C | -0.445337 | 2.779839  | -0.679605 |
| H | -0.498066 | 3.666214  | -0.033366 |
| H | -0.293990 | 3.113955  | -1.708361 |
| C | -1.681050 | 2.001368  | -0.565213 |
| C | -2.631591 | 1.266428  | -0.425608 |
| C | -3.708203 | 0.331493  | -0.256821 |
| C | -3.419346 | -0.961613 | 0.207433  |
| C | -5.032824 | 0.685208  | -0.549641 |
| C | -4.445885 | -1.885977 | 0.374614  |
| H | -2.390627 | -1.227841 | 0.436066  |
| C | -6.053568 | -0.246086 | -0.378606 |
| H | -5.252412 | 1.685152  | -0.909347 |
| C | -5.763754 | -1.530798 | 0.082518  |
| H | -4.217233 | -2.884192 | 0.733798  |
| H | -7.077517 | 0.031831  | -0.606607 |
| H | -6.562580 | -2.253511 | 0.213978  |
| S | 2.196097  | 2.295156  | -0.927886 |

|   |          |          |           |
|---|----------|----------|-----------|
| O | 1.971787 | 2.771877 | -2.289537 |
| C | 2.818907 | 3.656858 | 0.039814  |
| O | 3.055245 | 1.143174 | -0.688335 |
| H | 2.932712 | 3.324363 | 1.071896  |
| H | 3.786503 | 3.925363 | -0.386795 |
| H | 2.120559 | 4.490863 | -0.041018 |

B\_R1Ph\_R2Ph\_XNMs\_conf1  
SCF Energy: -1600.21662349  
Num. Imaginary Frequencies: 0

|   |           |           |           |
|---|-----------|-----------|-----------|
| C | -1.137988 | -0.702664 | 0.612319  |
| N | -0.728466 | -1.285459 | 1.916223  |
| N | 0.489922  | -1.548401 | 1.897221  |
| C | -1.742185 | 0.676613  | 0.787411  |
| C | -2.825233 | 0.851572  | 1.653592  |
| C | -1.291799 | 1.759583  | 0.015269  |
| C | -3.457694 | 2.083100  | 1.764140  |
| H | -3.168422 | 0.000012  | 2.234025  |
| C | -1.965232 | 2.984500  | 0.092928  |
| C | -3.029206 | 3.149037  | 0.969653  |
| H | -4.289736 | 2.207920  | 2.448769  |
| H | -1.635506 | 3.807954  | -0.530348 |
| H | -3.531438 | 4.109122  | 1.025515  |
| C | -2.095480 | -1.686071 | -0.086496 |
| C | -3.180061 | -1.233432 | -0.839449 |
| C | -1.826529 | -3.058621 | -0.031194 |
| C | -3.991721 | -2.143050 | -1.521141 |
| H | -3.402934 | -0.172421 | -0.896084 |
| C | -2.640479 | -3.963676 | -0.705179 |
| H | -0.979778 | -3.424237 | 0.543223  |
| C | -3.728032 | -3.508045 | -1.453076 |
| H | -4.832645 | -1.777062 | -2.101548 |
| H | -2.425335 | -5.025774 | -0.645783 |
| H | -4.363446 | -4.214275 | -1.977718 |
| N | -0.182695 | 1.635664  | -0.888277 |
| C | 0.149670  | 0.259524  | -1.342934 |
| H | -0.626940 | -0.044052 | -2.052626 |
| H | 1.109538  | 0.273634  | -1.857668 |
| C | 0.149629  | -0.613112 | -0.137234 |
| C | 1.095627  | -1.164495 | 0.639592  |
| C | 2.530344  | -1.380063 | 0.436690  |
| C | 3.410575  | -1.320490 | 1.524446  |
| C | 3.035859  | -1.638691 | -0.843588 |
| C | 4.778432  | -1.491866 | 1.327230  |
| H | 3.018894  | -1.128439 | 2.518262  |
| C | 4.404078  | -1.806652 | -1.037857 |
| H | 2.353150  | -1.732240 | -1.683449 |
| C | 5.278884  | -1.730077 | 0.046669  |
| H | 5.454938  | -1.437252 | 2.174149  |
| H | 4.786594  | -2.008536 | -2.033304 |
| H | 6.345302  | -1.863952 | -0.104517 |
| S | 1.191546  | 2.594720  | -0.576773 |
| C | 1.472647  | 3.345290  | -2.162821 |
| O | 0.813524  | 3.628681  | 0.377742  |
| O | 2.325154  | 1.724418  | -0.276515 |
| H | 2.376536  | 3.948328  | -2.067471 |
| H | 1.613578  | 2.556593  | -2.902256 |
| H | 0.607531  | 3.962464  | -2.402604 |

B\_R1Ph\_R2Ph\_XNMs\_conf1\_prim

SCF Energy: -1600.21662351  
Num. Imaginary Frequencies: 0

|   |           |           |           |
|---|-----------|-----------|-----------|
| C | -1.138045 | -0.702528 | 0.612263  |
| N | -0.728532 | -1.285227 | 1.916216  |
| N | 0.489839  | -1.548245 | 1.897213  |
| C | -1.742193 | 0.676788  | 0.787234  |
| C | -2.825255 | 0.851873  | 1.653372  |
| C | -1.291737 | 1.759679  | 0.015025  |
| C | -3.457651 | 2.083446  | 1.763804  |
| H | -3.168508 | 0.000381  | 2.233867  |
| C | -1.965094 | 2.984641  | 0.092572  |
| C | -3.029086 | 3.149304  | 0.969251  |
| H | -4.289705 | 2.208364  | 2.448400  |
| H | -1.635293 | 3.808022  | -0.530765 |
| H | -3.531269 | 4.109420  | 1.025032  |
| C | -2.095586 | -1.685973 | -0.086437 |
| C | -3.180191 | -1.233379 | -0.839381 |
| C | -1.826666 | -3.058524 | -0.031018 |
| C | -3.991909 | -2.143043 | -1.520943 |
| H | -3.403041 | -0.172369 | -0.896108 |
| C | -2.640671 | -3.963624 | -0.704875 |
| H | -0.979895 | -3.424107 | 0.543391  |
| C | -3.728253 | -3.508038 | -1.452758 |
| H | -4.832853 | -1.777089 | -2.101343 |
| H | -2.425551 | -5.025722 | -0.645386 |
| H | -4.363713 | -4.214303 | -1.977297 |
| N | -0.182579 | 1.635669  | -0.888450 |
| C | 0.149660  | 0.259481  | -1.343056 |
| H | -0.626997 | -0.044045 | -2.052716 |
| H | 1.109507  | 0.273500  | -1.857830 |
| C | 0.149569  | -0.613104 | -0.137315 |
| C | 1.095546  | -1.164482 | 0.639542  |
| C | 2.530251  | -1.380135 | 0.436641  |
| C | 3.410505  | -1.320546 | 1.524377  |
| C | 3.035731  | -1.638846 | -0.843633 |
| C | 4.778352  | -1.491982 | 1.327141  |
| H | 3.018852  | -1.128427 | 2.518191  |
| C | 4.403940  | -1.806868 | -1.037923 |
| H | 2.353002  | -1.732408 | -1.683477 |
| C | 5.278770  | -1.730273 | 0.046580  |
| H | 5.454878  | -1.437352 | 2.174043  |
| H | 4.786427  | -2.008814 | -2.033368 |
| H | 6.345180  | -1.864193 | -0.104621 |
| S | 1.191750  | 2.594503  | -0.576595 |
| C | 1.473170  | 3.345348  | -2.162455 |
| O | 0.813729  | 3.628332  | 0.378063  |
| O | 2.325212  | 1.724004  | -0.276351 |
| H | 2.376947  | 3.948500  | -2.066753 |
| H | 1.614435  | 2.556784  | -2.901961 |
| H | 0.608035  | 3.962440  | -2.402373 |

B\_R1Ph\_R2Ph\_XNMs\_conf2  
SCF Energy: -1600.22560308  
Num. Imaginary Frequencies: 0

|   |           |           |           |
|---|-----------|-----------|-----------|
| C | -0.067411 | 0.690940  | -1.032313 |
| N | 0.785039  | 1.317121  | -2.074972 |
| N | 1.987468  | 1.188275  | -1.771870 |
| C | -0.817874 | -0.509320 | -1.579562 |
| C | -1.106009 | -0.686829 | -2.930756 |
| C | -1.210547 | -1.483323 | -0.643103 |

|   |           |           |           |
|---|-----------|-----------|-----------|
| C | -1.814290 | -1.812598 | -3.350397 |
| H | -0.785797 | 0.064031  | -3.645318 |
| C | -1.899386 | -2.620197 | -1.069580 |
| C | -2.212258 | -2.770077 | -2.420052 |
| H | -2.047727 | -1.941417 | -4.401943 |
| H | -2.180247 | -3.375101 | -0.345886 |
| H | -2.753022 | -3.653062 | -2.744247 |
| C | -0.994477 | 1.759699  | -0.452969 |
| C | -2.221362 | 2.030987  | -1.063653 |
| C | -0.609580 | 2.493527  | 0.673169  |
| C | -3.064442 | 3.009360  | -0.540262 |
| H | -2.526928 | 1.466172  | -1.939546 |
| C | -1.456563 | 3.468885  | 1.199143  |
| H | 0.349600  | 2.303807  | 1.146913  |
| C | -2.688265 | 3.724397  | 0.597389  |
| H | -4.018676 | 3.207610  | -1.017695 |
| H | -1.153666 | 4.024101  | 2.080933  |
| H | -3.350568 | 4.477977  | 1.010955  |
| N | -0.862257 | -1.282358 | 0.728682  |
| C | 0.464524  | -0.719645 | 1.058128  |
| H | 0.372985  | -0.150504 | 1.988402  |
| H | 1.175354  | -1.535203 | 1.235596  |
| C | 0.929692  | 0.143144  | -0.062753 |
| C | 2.147532  | 0.456233  | -0.538070 |
| C | 3.494724  | 0.151661  | -0.049385 |
| C | 4.574744  | 0.105200  | -0.942576 |
| C | 3.718908  | -0.104538 | 1.310621  |
| C | 5.850277  | -0.209558 | -0.482918 |
| H | 4.405699  | 0.312016  | -1.994172 |
| C | 4.996254  | -0.422129 | 1.765511  |
| H | 2.901217  | -0.027145 | 2.021266  |
| C | 6.064078  | -0.478013 | 0.869971  |
| H | 6.679384  | -0.246692 | -1.182233 |
| H | 5.158536  | -0.615212 | 2.820963  |
| H | 7.059856  | -0.722147 | 1.225806  |
| S | -2.044898 | -1.326655 | 1.908944  |
| C | -3.181076 | -0.009719 | 1.529319  |
| O | -2.776202 | -2.582503 | 1.780315  |
| O | -1.363937 | -1.025571 | 3.165128  |
| H | -4.002696 | -0.100746 | 2.241364  |
| H | -2.660127 | 0.942183  | 1.642169  |
| H | -3.538611 | -0.149384 | 0.507748  |

B\_R1Ph\_R2Ph\_XNMs  
 SCF Energy: -1600.22560309  
 Num. Imaginary Frequencies: 0

|   |           |           |          |
|---|-----------|-----------|----------|
| C | 0.067397  | 0.691131  | 1.032174 |
| N | -0.785053 | 1.317452  | 2.074756 |
| N | -1.987480 | 1.188584  | 1.771656 |
| C | 0.817775  | -0.509124 | 1.579557 |
| C | 1.105855  | -0.686477 | 2.930785 |
| C | 1.210431  | -1.483257 | 0.643227 |
| C | 1.814111  | -1.812191 | 3.350601 |
| H | 0.785617  | 0.064473  | 3.645237 |
| C | 1.899261  | -2.620075 | 1.069888 |
| C | 2.212101  | -2.769782 | 2.420387 |
| H | 2.047516  | -1.940872 | 4.402172 |
| H | 2.180129  | -3.375090 | 0.346319 |
| H | 2.752857  | -3.652728 | 2.744701 |
| C | 0.994528  | 1.759785  | 0.452754 |
| C | 2.221501  | 2.030908  | 1.063332 |

|   |           |           |           |
|---|-----------|-----------|-----------|
| C | 0.609625  | 2.493717  | -0.673317 |
| C | 3.064676  | 3.009175  | 0.539911  |
| H | 2.527095  | 1.466021  | 1.939166  |
| C | 1.456712  | 3.468965  | -1.199338 |
| H | -0.349650 | 2.304199  | -1.146959 |
| C | 2.688507  | 3.724290  | -0.597694 |
| H | 4.018982  | 3.207265  | 1.017266  |
| H | 1.153822  | 4.024249  | -2.081088 |
| H | 3.350886  | 4.477770  | -1.011318 |
| N | 0.862150  | -1.282505 | -0.728605 |
| C | -0.464536 | -0.719606 | -1.058159 |
| H | -0.372818 | -0.150488 | -1.988425 |
| H | -1.175456 | -1.535076 | -1.235670 |
| C | -0.929700 | 0.143267  | 0.062652  |
| C | -2.147541 | 0.456415  | 0.537931  |
| C | -3.494735 | 0.151763  | 0.049304  |
| C | -4.574690 | 0.105179  | 0.942569  |
| C | -3.718982 | -0.104414 | -1.310692 |
| C | -5.850222 | -0.209696 | 0.482993  |
| H | -4.405583 | 0.311970  | 1.994160  |
| C | -4.996329 | -0.422126 | -1.765499 |
| H | -2.901345 | -0.026913 | -2.021390 |
| C | -6.064085 | -0.478141 | -0.869887 |
| H | -6.679278 | -0.246932 | 1.182365  |
| H | -5.158668 | -0.615207 | -2.820943 |
| H | -7.059861 | -0.722382 | -1.225656 |
| S | 2.044915  | -1.327001 | -1.908754 |
| C | 3.181130  | -0.010153 | -1.529113 |
| O | 2.776060  | -2.582921 | -1.779970 |
| O | 1.364132  | -1.025949 | -3.165040 |
| H | 4.002907  | -0.101352 | -2.240960 |
| H | 2.660205  | 0.941730  | -1.642256 |
| H | 3.538415  | -0.149676 | -0.507426 |

C\_R1Ph\_R2Ph\_XNMs\_conf1  
 SCF Energy: -1600.23946410  
 Num. Imaginary Frequencies: 0

|   |           |           |           |
|---|-----------|-----------|-----------|
| C | -0.389093 | 1.902993  | 0.015157  |
| N | 0.292696  | 2.992880  | 0.059049  |
| N | 1.665131  | 2.670406  | -0.109220 |
| C | -1.844255 | 1.805068  | -0.026611 |
| C | -2.662589 | 2.834578  | 0.449129  |
| C | -2.416833 | 0.650015  | -0.601574 |
| C | -4.044552 | 2.722390  | 0.386480  |
| H | -2.189926 | 3.711835  | 0.879578  |
| C | -3.811499 | 0.555975  | -0.686742 |
| C | -4.609279 | 1.579057  | -0.181298 |
| H | -4.676311 | 3.516826  | 0.767891  |
| H | -4.269202 | -0.303511 | -1.159596 |
| H | -5.687948 | 1.484046  | -0.251745 |
| C | 0.509366  | -0.237651 | 1.034104  |
| C | 1.135702  | -1.485840 | 0.936104  |
| C | -0.053485 | 0.144873  | 2.255792  |
| C | 1.185968  | -2.339702 | 2.035508  |
| H | 1.579456  | -1.807003 | -0.000893 |
| C | -0.004419 | -0.711892 | 3.356295  |
| H | -0.540278 | 1.110264  | 2.357498  |
| C | 0.611794  | -1.956982 | 3.248758  |
| H | 1.669498  | -3.306429 | 1.940221  |
| H | -0.452693 | -0.402833 | 4.294946  |
| H | 0.645426  | -2.625333 | 4.102996  |

|   |           |           |           |
|---|-----------|-----------|-----------|
| N | -1.554529 | -0.366644 | -1.104781 |
| C | -0.154421 | -0.023159 | -1.409171 |
| H | 0.363344  | -0.944310 | -1.666100 |
| H | -0.141076 | 0.642737  | -2.278933 |
| C | 0.461524  | 0.684420  | -0.187742 |
| C | 1.794623  | 1.405239  | -0.331326 |
| C | 3.118579  | 0.792389  | -0.534255 |
| C | 4.215864  | 1.267065  | 0.196078  |
| C | 3.304002  | -0.241842 | -1.459695 |
| C | 5.476835  | 0.709210  | 0.006988  |
| H | 4.065252  | 2.066058  | 0.914797  |
| C | 4.567908  | -0.794951 | -1.650627 |
| H | 2.470640  | -0.602910 | -2.054565 |
| C | 5.654971  | -0.323227 | -0.915171 |
| H | 6.320266  | 1.076824  | 0.582392  |
| H | 4.702770  | -1.590846 | -2.375646 |
| H | 6.638418  | -0.758529 | -1.060702 |
| S | -1.991204 | -1.988933 | -0.974318 |
| C | -2.368359 | -2.254055 | 0.746162  |
| O | -3.218295 | -2.201897 | -1.735122 |
| O | -0.806081 | -2.757550 | -1.339727 |
| H | -2.758330 | -3.271038 | 0.809450  |
| H | -1.450762 | -2.144173 | 1.324051  |
| H | -3.127492 | -1.533481 | 1.052845  |

D\_R1Ph\_R2Ph\_XNMs\_1

SCF Energy: -1600.27128386

Num. Imaginary Frequencies: 0

|   |           |           |           |
|---|-----------|-----------|-----------|
| C | 0.508302  | 0.271582  | -0.537362 |
| N | 0.449257  | 1.577638  | -0.155824 |
| N | -0.821983 | 2.004609  | -0.044791 |
| C | 1.648274  | -0.598903 | -0.821913 |
| C | 2.928354  | -0.172032 | -1.193445 |
| C | 1.373119  | -1.984018 | -0.784317 |
| C | 3.924544  | -1.103293 | -1.470692 |
| H | 3.142759  | 0.888304  | -1.271548 |
| C | 2.372981  | -2.911044 | -1.069140 |
| C | 3.651818  | -2.470007 | -1.399122 |
| H | 4.913804  | -0.759976 | -1.754378 |
| H | 2.133442  | -3.967323 | -1.027292 |
| H | 4.428976  | -3.193718 | -1.620403 |
| C | 1.513580  | 2.462987  | 0.189039  |
| C | 1.567480  | 3.720933  | -0.406390 |
| C | 2.464637  | 2.065096  | 1.126845  |
| C | 2.600187  | 4.590202  | -0.061388 |
| H | 0.807691  | 4.003110  | -1.127383 |
| C | 3.501491  | 2.935938  | 1.453159  |
| H | 2.392569  | 1.086118  | 1.590734  |
| C | 3.570258  | 4.197728  | 0.861459  |
| H | 2.649720  | 5.572036  | -0.520325 |
| H | 4.248086  | 2.631463  | 2.179084  |
| H | 4.376188  | 4.875577  | 1.122668  |
| N | 0.046584  | -2.440714 | -0.465636 |
| C | -1.055240 | -1.603405 | -0.991881 |
| H | -1.087031 | -1.773109 | -2.074398 |
| H | -1.991555 | -1.972433 | -0.569663 |
| C | -0.795717 | -0.165903 | -0.658649 |
| C | -1.594180 | 0.958817  | -0.347341 |
| C | -3.062985 | 1.064409  | -0.311659 |
| C | -3.688895 | 1.975363  | 0.549475  |
| C | -3.851097 | 0.254766  | -1.138384 |

|   |           |           |           |
|---|-----------|-----------|-----------|
| C | -5.077167 | 2.070456  | 0.582607  |
| H | -3.078029 | 2.600236  | 1.193339  |
| C | -5.241406 | 0.346943  | -1.098646 |
| H | -3.378408 | -0.431772 | -1.835199 |
| C | -5.858005 | 1.253980  | -0.237926 |
| H | -5.551986 | 2.778138  | 1.254961  |
| H | -5.841072 | -0.284434 | -1.746512 |
| H | -6.940465 | 1.326541  | -0.207430 |
| S | -0.169594 | -3.070564 | 1.081091  |
| O | -1.558796 | -3.514073 | 1.145975  |
| O | 0.906869  | -4.030002 | 1.297596  |
| C | 0.050594  | -1.731088 | 2.239293  |
| H | -0.038226 | -2.164806 | 3.236560  |
| H | 1.047270  | -1.312693 | 2.089977  |
| H | -0.727383 | -0.987415 | 2.063229  |

E\_R1Ph\_R2Ph\_XNMs\_conf7

SCF Energy: -1600.24199700

Num. Imaginary Frequencies: 0

|   |           |           |           |
|---|-----------|-----------|-----------|
| C | -1.447944 | -1.687946 | -0.362850 |
| N | -1.157370 | -2.940244 | -0.472903 |
| N | 0.242386  | -3.117286 | -0.406680 |
| C | -0.189526 | -0.116313 | 1.161335  |
| C | -0.268216 | -0.646773 | 2.438633  |
| C | -0.080815 | 1.259585  | 0.957972  |
| C | -0.223402 | 0.226859  | 3.528446  |
| H | -0.353749 | -1.720511 | 2.584333  |
| C | -0.044715 | 2.144667  | 2.031805  |
| C | -0.109519 | 1.601500  | 3.318726  |
| H | -0.278447 | -0.165157 | 4.537918  |
| H | 0.021419  | 3.214688  | 1.876706  |
| H | -0.078563 | 2.272833  | 4.170592  |
| C | -2.835713 | -1.200123 | -0.381751 |
| C | -3.886742 | -2.129665 | -0.445549 |
| C | -3.135805 | 0.168144  | -0.342295 |
| C | -5.206385 | -1.697148 | -0.468334 |
| H | -3.652516 | -3.188235 | -0.474239 |
| C | -4.462156 | 0.596987  | -0.366573 |
| H | -2.348641 | 0.913355  | -0.297479 |
| C | -5.498790 | -0.331198 | -0.428562 |
| H | -6.010269 | -2.424597 | -0.515668 |
| H | -4.680828 | 1.659313  | -0.337077 |
| H | -6.530422 | 0.005429  | -0.446025 |
| N | -0.054115 | 1.539342  | -0.432767 |
| C | 0.035554  | 0.279295  | -1.213970 |
| H | -0.719557 | 0.277428  | -2.000995 |
| H | 1.022029  | 0.178544  | -1.678711 |
| C | -0.195642 | -0.850714 | -0.170344 |
| C | 0.818298  | -1.975350 | -0.248598 |
| C | 2.281035  | -1.828934 | -0.191254 |
| C | 3.095781  | -2.878343 | -0.643520 |
| C | 2.882428  | -0.658236 | 0.290199  |
| C | 4.479982  | -2.755626 | -0.611272 |
| H | 2.629118  | -3.780087 | -1.025362 |
| C | 4.270286  | -0.537240 | 0.318028  |
| H | 2.272124  | 0.155069  | 0.669715  |
| C | 5.071935  | -1.584356 | -0.132410 |
| H | 5.100329  | -3.571991 | -0.966561 |
| H | 4.721803  | 0.374183  | 0.697290  |
| H | 6.152796  | -1.489642 | -0.112193 |
| S | 0.649462  | 2.911133  | -1.065863 |

|   |          |          |           |
|---|----------|----------|-----------|
| C | 2.383025 | 2.804432 | -0.667450 |
| O | 0.487369 | 2.792943 | -2.508666 |
| O | 0.087272 | 4.048637 | -0.350889 |
| H | 2.850397 | 3.712200 | -1.051891 |
| H | 2.481751 | 2.751604 | 0.418687  |
| H | 2.798674 | 1.921115 | -1.154796 |

TS\_A\_B\_R1Ph\_R2Ph\_XNMs  
 SCF Energy: -1600.11321058  
 Num. Imaginary Frequencies: 1  
 Imaginary Frequency: -437.6933

|   |           |           |           |
|---|-----------|-----------|-----------|
| C | 0.100149  | -0.007211 | 1.344525  |
| N | -1.028358 | -0.077043 | 2.072107  |
| N | -2.175185 | -0.109943 | 2.026546  |
| C | 0.852456  | -1.278696 | 1.233372  |
| C | 0.884256  | -2.248073 | 2.239065  |
| C | 1.516964  | -1.521944 | 0.019051  |
| C | 1.597488  | -3.429716 | 2.051853  |
| H | 0.369521  | -2.060618 | 3.176588  |
| C | 2.228620  | -2.705371 | -0.163543 |
| C | 2.280878  | -3.652079 | 0.857084  |
| H | 1.628136  | -4.170615 | 2.843680  |
| H | 2.740348  | -2.889118 | -1.102115 |
| H | 2.844669  | -4.567257 | 0.711509  |
| C | 0.784073  | 1.318402  | 1.352545  |
| C | 2.173688  | 1.401694  | 1.474799  |
| C | 0.030291  | 2.491013  | 1.213822  |
| C | 2.803879  | 2.644126  | 1.451761  |
| H | 2.765008  | 0.495859  | 1.571439  |
| C | 0.662384  | 3.730253  | 1.201643  |
| H | -1.049486 | 2.428042  | 1.103960  |
| C | 2.051855  | 3.810052  | 1.318670  |
| H | 3.884579  | 2.697629  | 1.536542  |
| H | 0.071799  | 4.634218  | 1.092401  |
| H | 2.544072  | 4.777164  | 1.301679  |
| N | 1.382292  | -0.533105 | -0.997006 |
| C | 0.045697  | -0.223377 | -1.544103 |
| H | 0.127865  | 0.734820  | -2.063818 |
| H | -0.237152 | -0.994309 | -2.271821 |
| C | -1.037876 | -0.126034 | -0.535168 |
| C | -2.253297 | -0.120469 | -0.282277 |
| C | -3.684667 | -0.095755 | -0.455864 |
| C | -4.506575 | -1.068843 | 0.135192  |
| C | -4.275839 | 0.909531  | -1.238937 |
| C | -5.883115 | -1.044489 | -0.067591 |
| H | -4.056065 | -1.839085 | 0.753621  |
| C | -5.655581 | 0.935101  | -1.427515 |
| H | -3.644840 | 1.666599  | -1.694371 |
| C | -6.464226 | -0.042081 | -0.846559 |
| H | -6.505777 | -1.806941 | 0.390085  |
| H | -6.098963 | 1.719792  | -2.032701 |
| H | -7.538858 | -0.021610 | -0.996641 |
| S | 2.706852  | 0.139332  | -1.740019 |
| C | 2.905365  | -0.731364 | -3.282146 |
| O | 2.367299  | 1.518851  | -2.077161 |
| O | 3.858815  | -0.143365 | -0.891985 |
| H | 3.125851  | -1.777324 | -3.072422 |
| H | 1.982900  | -0.629469 | -3.855107 |
| H | 3.735396  | -0.258343 | -3.808632 |

TS\_B\_C\_R1Ph\_R2Ph\_XNMs  
 SCF Energy: -1600.18187572  
 Num. Imaginary Frequencies: 1  
 Imaginary Frequency: -532.1011

|   |           |           |           |
|---|-----------|-----------|-----------|
| C | -0.619002 | 0.715190  | -0.925168 |
| N | -0.062472 | 0.722438  | -2.184427 |
| N | 1.200136  | 0.360525  | -2.065152 |
| C | -2.051380 | 0.483303  | -0.664290 |
| C | -3.066339 | 1.169316  | -1.329130 |
| C | -2.371656 | -0.466976 | 0.323684  |
| C | -4.397800 | 0.899676  | -1.028199 |
| H | -2.799983 | 1.910357  | -2.076697 |
| C | -3.707979 | -0.719847 | 0.635916  |
| C | -4.714838 | -0.041106 | -0.045556 |
| H | -5.188122 | 1.428954  | -1.549620 |
| H | -3.939921 | -1.451986 | 1.400578  |
| H | -5.752657 | -0.242223 | 0.198137  |
| C | -0.015600 | 2.090638  | 0.052262  |
| C | -0.879498 | 2.538250  | 1.051140  |
| C | 0.974652  | 2.936012  | -0.459406 |
| C | -0.752179 | 3.840808  | 1.538138  |
| H | -1.668666 | 1.904359  | 1.442101  |
| C | 1.082490  | 4.231281  | 0.024216  |
| H | 1.657636  | 2.586654  | -1.227633 |
| C | 0.223233  | 4.690089  | 1.028707  |
| H | -1.430825 | 4.182625  | 2.312312  |
| H | 1.850706  | 4.883080  | -0.378087 |
| H | 0.319884  | 5.701678  | 1.408028  |
| N | -1.327764 | -1.191388 | 1.001379  |
| C | -0.081873 | -0.443537 | 1.282005  |
| H | -0.289284 | 0.249006  | 2.100214  |
| H | 0.674387  | -1.151000 | 1.625269  |
| C | 0.373093  | 0.254577  | 0.026523  |
| C | 1.512573  | 0.049920  | -0.786775 |
| C | 2.860144  | -0.334866 | -0.367881 |
| C | 3.741524  | -0.951311 | -1.268440 |
| C | 3.285422  | -0.082499 | 0.943722  |
| C | 5.020015  | -1.313340 | -0.857773 |
| H | 3.410747  | -1.146482 | -2.283806 |
| C | 4.565691  | -0.451989 | 1.352242  |
| H | 2.621964  | 0.426885  | 1.638710  |
| C | 5.435051  | -1.068896 | 0.453849  |
| H | 5.694632  | -1.792978 | -1.559899 |
| H | 4.885303  | -0.249822 | 2.369488  |
| H | 6.432334  | -1.355920 | 0.771336  |
| S | -1.131773 | -2.794356 | 0.493734  |
| C | -0.701966 | -2.728511 | -1.235716 |
| O | 0.003580  | -3.317710 | 1.245799  |
| O | -2.435706 | -3.433094 | 0.612460  |
| H | -0.618623 | -3.762464 | -1.573960 |
| H | -1.499982 | -2.211725 | -1.771224 |
| H | 0.253882  | -2.210969 | -1.338088 |

TS\_B\_D\_R1Ph\_R2Ph\_XNMs  
 SCF Energy: -1600.17563125  
 Num. Imaginary Frequencies: 1  
 Imaginary Frequency: -574.8442

|   |           |          |           |
|---|-----------|----------|-----------|
| C | -0.205555 | 0.535164 | -1.053364 |
| N | 0.467257  | 1.655897 | -1.604524 |
| N | 1.760380  | 1.485132 | -1.400480 |

|   |           |           |           |   |           |           |           |
|---|-----------|-----------|-----------|---|-----------|-----------|-----------|
| C | -1.494884 | -0.015924 | -1.509189 | C | 0.451402  | -1.263457 | 2.349707  |
| C | -2.224996 | 0.501200  | -2.580320 | C | -0.685105 | 0.611203  | 1.296482  |
| C | -1.928752 | -1.190171 | -0.868349 | C | 0.012762  | -0.808027 | 3.586985  |
| C | -3.411689 | -0.112757 | -2.972564 | H | 1.035217  | -2.174010 | 2.259657  |
| H | -1.853789 | 1.377441  | -3.103072 | C | -1.140168 | 1.057801  | 2.538676  |
| C | -3.108262 | -1.812190 | -1.275386 | C | -0.801105 | 0.326905  | 3.674410  |
| C | -3.855866 | -1.259291 | -2.313068 | H | 0.283374  | -1.354857 | 4.483348  |
| H | -3.981557 | 0.295395  | -3.800438 | H | -1.703187 | 1.980709  | 2.613934  |
| H | -3.424954 | -2.720084 | -0.776251 | H | -1.151412 | 0.665729  | 4.643523  |
| H | -4.775698 | -1.743059 | -2.624142 | C | -1.519572 | -1.635419 | -0.668780 |
| C | -0.427795 | 2.056230  | -0.056890 | C | -1.868109 | -1.429247 | -2.007050 |
| C | -1.670709 | 2.665355  | -0.181132 | C | -2.494356 | -2.020425 | 0.254084  |
| C | 0.392054  | 2.292596  | 1.042536  | C | -3.187976 | -1.609616 | -2.419788 |
| C | -2.123052 | 3.487292  | 0.853944  | H | -1.105273 | -1.144234 | -2.726752 |
| H | -2.290063 | 2.504155  | -1.054903 | C | -3.813036 | -2.199962 | -0.160566 |
| C | -0.071642 | 3.114785  | 2.062806  | H | -2.217059 | -2.177156 | 1.293435  |
| H | 1.380117  | 1.846440  | 1.105235  | C | -4.161083 | -1.994687 | -1.496470 |
| C | -1.335146 | 3.707667  | 1.980313  | H | -3.453883 | -1.451084 | -3.459800 |
| H | -3.097321 | 3.956778  | 0.765149  | H | -4.567980 | -2.500679 | 0.558652  |
| H | 0.561152  | 3.293121  | 2.926239  | H | -5.188225 | -2.134777 | -1.817592 |
| H | -1.691109 | 4.347135  | 2.780762  | N | -0.803989 | 1.273694  | 0.064540  |
| N | -1.112238 | -1.760148 | 0.163014  | C | 0.335629  | 1.005881  | -0.826710 |
| C | 0.350736  | -1.709474 | -0.040122 | C | 0.804828  | -0.373028 | -0.457495 |
| H | 0.835089  | -1.967706 | 0.904927  | C | 2.098113  | -0.960071 | -0.467509 |
| H | 0.602135  | -2.496826 | -0.761816 | C | 3.411081  | -0.306612 | -0.539086 |
| C | 0.765699  | -0.366960 | -0.560480 | C | 4.469287  | -0.790554 | 0.244478  |
| C | 1.974034  | 0.266143  | -0.813960 | C | 3.635356  | 0.790095  | -1.382813 |
| C | 3.347978  | -0.176204 | -0.520666 | C | 5.720171  | -0.183021 | 0.190888  |
| C | 4.381706  | 0.767301  | -0.440928 | H | 4.296304  | -1.641095 | 0.896496  |
| C | 3.640634  | -1.529527 | -0.310208 | C | 4.887038  | 1.401411  | -1.428082 |
| C | 5.681320  | 0.361809  | -0.151764 | H | 2.842816  | 1.146791  | -2.034333 |
| H | 4.153470  | 1.815421  | -0.602967 | C | 5.931502  | 0.918406  | -0.640646 |
| C | 4.942936  | -1.932609 | -0.023119 | H | 6.530467  | -0.564932 | 0.803923  |
| H | 2.859842  | -2.278900 | -0.389972 | H | 5.048187  | 2.247329  | -2.088678 |
| C | 5.965642  | -0.988346 | 0.059259  | H | 6.906483  | 1.393680  | -0.678261 |
| H | 6.473692  | 1.100776  | -0.088303 | H | 0.009014  | 1.041908  | -1.868403 |
| H | 5.157672  | -2.984863 | 0.132512  | H | 1.125317  | 1.747542  | -0.667330 |
| H | 6.979552  | -1.302860 | 0.285042  | S | -1.987941 | 2.380379  | -0.310531 |
| S | -1.703561 | -1.781940 | 1.730264  | C | -3.480683 | 1.419645  | -0.252103 |
| C | -1.706663 | -0.101455 | 2.315875  | O | -2.059387 | 3.393267  | 0.737228  |
| O | -3.087352 | -2.233914 | 1.654321  | O | -1.702943 | 2.787605  | -1.681473 |
| O | -0.734520 | -2.541039 | 2.514760  | H | -4.304817 | 2.113094  | -0.425867 |
| H | -2.161881 | -0.113147 | 3.307521  | H | -3.423330 | 0.659018  | -1.031676 |
| H | -0.673771 | 0.243406  | 2.366496  | H | -3.560253 | 0.967482  | 0.738302  |
| H | -2.294773 | 0.508071  | 1.625697  |   |           |           |           |

TS\_B\_E\_R1Ph\_R2Ph\_XNMs

SCF Energy: -1600.18266993

Num. Imaginary Frequencies: 1

Imaginary Frequency: -519.1486

|   |           |           |           |
|---|-----------|-----------|-----------|
| C | -0.085905 | -1.516017 | -0.274758 |
| N | 0.697057  | -2.642517 | -0.192751 |
| N | 1.967086  | -2.283657 | -0.282672 |
| C | 0.060406  | -0.572224 | 1.203823  |

Set 2 corresponds to the cartesian coordinates for alkylphenone derivatives without methylation at alpha position

**R1Ph\_R2Me\_XO:**

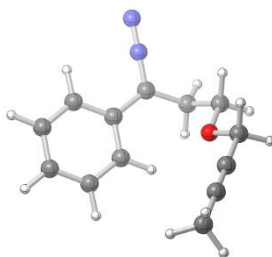

| FILE                   | SCF E       | SCF+ZPVE    | H           | TS         | G            |
|------------------------|-------------|-------------|-------------|------------|--------------|
| A_Ph_C2H4O_H_Me_conf1  | -431821.13  | -431821.13  | -431821.13  | 40.9838934 | -431862.1136 |
| A_Ph_C2H4O_H_Me_conf5  | -431821.433 | -431821.433 | -431821.433 | 40.6274681 | -431862.06   |
| A_Ph_C2H4O_H_Me_conf15 | -431821.855 | -431668.308 | -431657.501 | 41.4444853 | -431698.9452 |
| A_Ph_C2H4O_H_Me_conf7  | -431821.433 | -431667.961 | -431657.097 | 41.7130593 | -431698.8098 |
| A_Ph_C2H4O_H_Me_conf9  | -431821.697 | -431668.232 | -431657.408 | 41.2424273 | -431698.6501 |
| A_Ph_C2H4O_H_Me_conf8  | -431821.856 | -431668.261 | -431657.497 | 40.6306056 | -431698.1278 |
| A_Ph_C2H4O_H_Me_conf4  | -431821.856 | -431668.261 | -431657.498 | 40.6274681 | -431698.1257 |
| A_Ph_C2H4O_H_Me_conf11 | -431821.433 | -431667.929 | -431657.094 | 40.8916495 | -431697.9854 |
| A_Ph_C2H4O_H_Me        | -431820.329 | -431666.962 | -431656.004 | 41.5059812 | -431697.51   |
| A_Ph_C2H4O_H_Me_conf6  | -431822.159 | -431668.294 | -431657.699 | 39.7960181 | -431697.4951 |
| A_Ph_C2H4O_H_Me_conf10 | -431820.327 | -431666.956 | -431655.999 | 41.4030697 | -431697.4021 |
| A_Ph_C2H4O_H_Me_conf12 | -431821.154 | -431667.491 | -431656.768 | 40.525184  | -431697.2934 |
| A_Ph_C2H4O_H_Me_conf2  | -431821.13  | -431667.568 | -431656.801 | 40.4341952 | -431697.2355 |
| A_Ph_C2H4O_H_Me_conf14 | -431820.402 | -431666.736 | -431655.97  | 40.5885625 | -431696.5582 |
| A_Ph_C2H4O_H_Me_conf13 | -431819.215 | -431665.624 | -431654.756 | 41.2267395 | -431695.9826 |
| A_Ph_C2H4O_H_Me_conf3  | -431817.223 | -431663.645 | -431652.85  | 40.9838934 | -431693.8341 |
| B_Ph_C2H4O_H_Me        | -431871.903 | -431714.779 | -431706.03  | 33.6627413 | -431739.6928 |
| B_Ph_C2H4O_H_Me_conf2  | -431871.903 | -431714.779 | -431706.03  | 33.6627413 | -431739.6928 |
| B_Ph_C2H4O_H_Me_conf1  | -431871.903 | -431714.779 | -431706.03  | 33.6621138 | -431739.6922 |
| B_Ph_C2H4O_H_Me_conf6  | -431867.137 | -431710.241 | -431701.324 | 34.3912797 | -431735.7148 |
| B_Ph_C2H4O_H_Me_conf5  | -431867.137 | -431710.24  | -431701.323 | 34.3881422 | -431735.7111 |
| B_Ph_C2H4O_H_Me_conf3  | -431867.137 | -431710.24  | -431701.323 | 34.3875147 | -431735.7104 |
| B_Ph_C2H4O_H_Me_conf7  | -431867.137 | -431710.24  | -431701.323 | 34.3862596 | -431735.7091 |
| B_Ph_C2H4O_H_Me_conf4  | -431867.137 | -431710.24  | -431701.323 | 34.3856321 | -431735.7085 |
| C_Ph_C2H4O_H_Me_conf2  | -431881.994 | -431724.787 | -431716.049 | 33.5548097 | -431749.604  |
| C_Ph_C2H4O_H_Me_conf3  | -431881.994 | -431724.788 | -431716.05  | 33.5541822 | -431749.6039 |
| C_Ph_C2H4O_H_Me_conf1  | -431881.994 | -431724.787 | -431716.049 | 33.5548097 | -431749.6033 |
| C_Ph_C2H4O_H_Me_conf5  | -431875.086 | -431718.32  | -431709.346 | 34.4151251 | -431743.7608 |
| C_Ph_C2H4O_H_Me_conf4  | -431875.301 | -431718.259 | -431709.404 | 33.9200202 | -431743.3244 |
| C_Ph_C2H4O_H_Me        | -431875.301 | -431718.258 | -431709.404 | 33.9187651 | -431743.3232 |
| D_Ph_C2H4O_H_Me_conf3  | -431898.04  | -431740.359 | -431731.523 | 34.0712499 | -431765.5946 |
| D_Ph_C2H4O_H_Me_conf1  | -431898.04  | -431740.359 | -431731.523 | 34.0706224 | -431765.5934 |
| D_Ph_C2H4O_H_Me_conf5  | -431898.04  | -431740.359 | -431731.523 | 34.0706224 | -431765.5934 |
| D_Ph_C2H4O_H_Me_conf2  | -431896.909 | -431739.284 | -431730.395 | 34.3228812 | -431764.7176 |

|                       |             |             |             |            |              |
|-----------------------|-------------|-------------|-------------|------------|--------------|
| D_Ph_C2H4O_H_Me       | -431896.909 | -431739.284 | -431730.395 | 34.3228812 | -431764.7176 |
| D_Ph_C2H4O_H_Me_conf6 | -431896.909 | -431739.284 | -431730.395 | 34.3228812 | -431764.7176 |
| D_Ph_C2H4O_H_Me_conf4 | -431896.909 | -431739.284 | -431730.395 | 34.3222537 | -431764.717  |
| E_Ph_C2H4O_H_Me_conf1 | -431881.513 | -431724.427 | -431715.526 | 34.07376   | -431749.5998 |
| E_Ph_C2H4O_H_Me_conf6 | -431881.513 | -431724.427 | -431715.525 | 34.0743875 | -431749.5998 |
| E_Ph_C2H4O_H_Me_conf3 | -431881.513 | -431724.426 | -431715.525 | 34.072505  | -431749.5979 |
| E_Ph_C2H4O_H_Me_conf2 | -431881.513 | -431724.427 | -431715.525 | 34.072505  | -431749.5979 |
| E_Ph_C2H4O_H_Me_conf5 | -431881.513 | -431724.425 | -431715.525 | 34.0681124 | -431749.5935 |
| E_Ph_C2H4O_H_Me       | -431880.643 | -431723.412 | -431714.557 | 33.943238  | -431748.5    |
| E_Ph_C2H4O_H_Me_conf4 | -431878.962 | -431722.109 | -431713.05  | 34.6115355 | -431747.6617 |
| TS_A_B_Ph_C2H4O_H_Me  | -431801.19  | -431646.981 | -431637.559 | 35.0357319 | -431672.5944 |
| TS_B_C_Ph_C2H4O_H_Me  | -431837.182 | -431681.172 | -431672.693 | 32.570875  | -431705.2643 |
| TS_B_D_Ph_C2H4O_H_Me  | -431838.625 | -431683.055 | -431674.415 | 33.3552617 | -431707.7704 |
| TS_B_E_Ph_C2H4O_H_Me  | -431842.759 | -431686.865 | -431678.206 | 33.4876662 | -431711.6941 |

A\_Ph\_C2H4O\_H\_Me\_conf10  
SCF Energy: -688.149584895  
Num. Imaginary Frequencies: 0

|   |           |           |           |
|---|-----------|-----------|-----------|
| C | -1.293857 | 0.596242  | -0.005138 |
| N | -1.320591 | 1.893436  | -0.007567 |
| N | -1.369679 | 3.034030  | -0.009488 |
| C | -2.576778 | -0.112127 | -0.002357 |
| C | -2.590107 | -1.516593 | -0.000349 |
| C | -3.806578 | 0.570269  | -0.001207 |
| C | -3.797062 | -2.212783 | 0.003025  |
| H | -1.657600 | -2.071202 | -0.001405 |
| C | -5.006148 | -0.132594 | 0.002153  |
| H | -3.828410 | 1.656542  | -0.002799 |
| C | -5.011491 | -1.528951 | 0.004378  |
| H | -3.783368 | -3.298366 | 0.004629  |
| H | -5.943319 | 0.415362  | 0.003116  |
| H | -5.949410 | -2.074244 | 0.007120  |
| C | 3.565685  | 0.879937  | 0.023065  |
| H | 3.575101  | 1.546935  | -0.851145 |
| C | 4.755389  | 0.025892  | 0.010273  |
| C | 5.748224  | -0.663703 | -0.000281 |
| C | 0.044142  | -0.103305 | -0.004842 |
| H | 0.119834  | -0.747569 | -0.889142 |
| H | 0.116595  | -0.750886 | 0.877239  |
| C | 1.224282  | 0.854401  | -0.000072 |
| H | 1.205124  | 1.502340  | -0.890023 |
| H | 1.199069  | 1.499406  | 0.891824  |
| O | 2.400606  | 0.071870  | 0.002343  |
| H | 3.567919  | 1.511236  | 0.923447  |
| C | 6.947706  | -1.503184 | -0.014287 |
| H | 7.455350  | -1.472023 | 0.952576  |
| H | 6.682683  | -2.541350 | -0.228636 |
| H | 7.647038  | -1.164410 | -0.782314 |

A\_Ph\_C2H4O\_H\_Me\_conf11  
SCF Energy: -688.151346454  
Num. Imaginary Frequencies: 0

|   |           |          |           |
|---|-----------|----------|-----------|
| C | -1.422885 | 1.091468 | -0.360135 |
| N | -1.869686 | 2.293093 | -0.144705 |

|   |           |           |           |
|---|-----------|-----------|-----------|
| N | -2.281207 | 3.339532  | 0.037572  |
| C | -2.358118 | -0.024458 | -0.185357 |
| C | -3.687564 | 0.177234  | 0.227820  |
| C | -1.931948 | -1.339042 | -0.439994 |
| C | -4.555838 | -0.898775 | 0.377022  |
| H | -4.048476 | 1.180961  | 0.434443  |
| C | -2.808180 | -2.411109 | -0.288255 |
| H | -0.913055 | -1.531664 | -0.760233 |
| C | -4.124180 | -2.201305 | 0.120922  |
| H | -5.577227 | -0.716544 | 0.696627  |
| H | -2.454757 | -3.417208 | -0.492012 |
| H | -4.803639 | -3.038737 | 0.239267  |
| C | 3.079982  | -0.118009 | 0.989814  |
| H | 3.109894  | 0.640820  | 1.785196  |
| C | 4.424417  | -0.319988 | 0.444197  |
| C | 5.538954  | -0.488918 | 0.007411  |
| C | 0.028972  | 0.951337  | -0.741930 |
| H | 0.407021  | 1.905363  | -1.119510 |
| H | 0.124202  | 0.227093  | -1.558141 |
| C | 0.889443  | 0.502970  | 0.434415  |
| H | 0.883967  | 1.273413  | 1.220154  |
| H | 0.496038  | -0.427363 | 0.871681  |
| O | 2.204546  | 0.298878  | -0.043920 |
| H | 2.713615  | -1.053686 | 1.436865  |
| C | 6.887037  | -0.692314 | -0.526578 |
| H | 6.894601  | -0.537163 | -1.608191 |
| H | 7.592894  | 0.009226  | -0.075769 |
| H | 7.234244  | -1.708460 | -0.325212 |

A\_Ph\_C2H4O\_H\_Me\_conf12  
SCF Energy: -688.150902707  
Num. Imaginary Frequencies: 0

|   |           |           |           |
|---|-----------|-----------|-----------|
| C | 0.716908  | 0.849231  | 0.998665  |
| N | -0.025341 | 0.291292  | 1.909253  |
| N | -0.654997 | -0.210583 | 2.714554  |
| C | 1.745718  | 0.021056  | 0.363413  |
| C | 1.924073  | -1.333335 | 0.701312  |
| C | 2.581563  | 0.576663  | -0.620469 |
| C | 2.907049  | -2.096893 | 0.081152  |
| H | 1.291570  | -1.795379 | 1.454252  |



|   |           |           |           |
|---|-----------|-----------|-----------|
| C | 3.562707  | -0.195735 | -1.237897 |
| H | 2.472154  | 1.617622  | -0.906486 |
| C | 3.734180  | -1.535559 | -0.893320 |
| H | 3.024893  | -3.139236 | 0.360877  |
| H | 4.196403  | 0.257650  | -1.993920 |
| H | 4.498909  | -2.134297 | -1.376686 |
| C | -1.668491 | 0.299303  | -1.190715 |
| H | -1.614247 | 0.440845  | -2.279261 |
| C | -2.888919 | -0.433146 | -0.844092 |
| C | -3.891751 | -1.049361 | -0.567884 |
| C | 0.353146  | 2.252877  | 0.584751  |
| H | 1.261349  | 2.853742  | 0.463595  |
| H | -0.230904 | 2.719669  | 1.382883  |
| C | -0.470471 | 2.293178  | -0.704905 |
| H | -0.737801 | 3.328776  | -0.937102 |
| H | 0.103190  | 1.892776  | -1.550889 |
| O | -1.677888 | 1.562611  | -0.539757 |
| H | -0.788411 | -0.284478 | -0.886135 |
| C | -5.106958 | -1.792613 | -0.229535 |
| H | -5.522674 | -2.276301 | -1.116711 |
| H | -4.896865 | -2.562537 | 0.516546  |
| H | -5.864619 | -1.118687 | 0.177594  |

A\_Ph\_C2H4O\_H\_Me\_conf13  
 SCF Energy: -688.147812839  
 Num. Imaginary Frequencies: 0

|   |           |           |           |
|---|-----------|-----------|-----------|
| C | -1.254327 | 0.715807  | -0.078920 |
| N | -1.378986 | 2.004889  | 0.006374  |
| N | -1.517768 | 3.135024  | 0.085560  |
| C | -2.477885 | -0.089879 | -0.032794 |
| C | -2.388866 | -1.487345 | -0.142382 |
| C | -3.749808 | 0.490910  | 0.119070  |
| C | -3.537136 | -2.275484 | -0.099763 |
| H | -1.422008 | -1.964688 | -0.263112 |
| C | -4.890397 | -0.303206 | 0.160123  |
| H | -3.851069 | 1.569137  | 0.206514  |
| C | -4.793727 | -1.691980 | 0.051499  |
| H | -3.444204 | -3.353660 | -0.186748 |
| H | -5.861571 | 0.167357  | 0.278277  |
| H | -5.685791 | -2.308596 | 0.084032  |
| C | 3.027158  | -0.155388 | 0.574106  |
| H | 2.927320  | 0.391009  | 1.523378  |
| C | 4.439078  | -0.446743 | 0.313384  |
| C | 5.603641  | -0.698221 | 0.108533  |
| C | 0.128478  | 0.125608  | -0.218133 |
| H | 0.194606  | -0.440282 | -1.156136 |
| H | 0.283122  | -0.585176 | 0.602945  |
| C | 1.234502  | 1.181163  | -0.214266 |
| H | 1.058996  | 1.913620  | -1.007177 |
| H | 1.256203  | 1.714138  | 0.748603  |
| O | 2.506995  | 0.629082  | -0.488967 |
| H | 2.473835  | -1.098488 | 0.670735  |
| C | 7.014829  | -0.997689 | -0.141616 |
| H | 7.151609  | -2.054758 | -0.381198 |
| H | 7.386176  | -0.405242 | -0.981304 |
| H | 7.620851  | -0.761726 | 0.736338  |

A\_Ph\_C2H4O\_H\_Me\_conf14  
 SCF Energy: -688.149703115  
 Num. Imaginary Frequencies: 0

|   |           |           |           |
|---|-----------|-----------|-----------|
| C | -1.305549 | 0.993096  | -0.288805 |
| N | -1.636432 | 2.240153  | -0.130782 |
| N | -1.945603 | 3.328801  | 0.000527  |
| C | -2.360725 | -0.015239 | -0.144365 |
| C | -2.063141 | -1.372040 | -0.355973 |
| C | -3.680476 | 0.333367  | 0.195474  |
| C | -3.054117 | -2.343260 | -0.232997 |
| H | -1.055642 | -1.676969 | -0.620168 |
| C | -4.663976 | -0.642493 | 0.315360  |
| H | -3.943035 | 1.373406  | 0.368218  |
| C | -4.359597 | -1.988169 | 0.102899  |
| H | -2.798956 | -3.384889 | -0.401773 |
| H | -5.675254 | -0.347774 | 0.578162  |
| H | -5.128702 | -2.747298 | 0.198784  |
| C | 3.094057  | 0.628558  | 0.045313  |
| H | 2.862265  | 1.064048  | -0.935633 |
| C | 4.432126  | 0.032928  | 0.006895  |
| C | 5.541042  | -0.446884 | -0.032105 |
| C | 0.144137  | 0.690999  | -0.573069 |
| H | 0.630033  | 1.600829  | -0.936608 |
| H | 0.214957  | -0.051178 | -1.376777 |
| C | 0.861415  | 0.156650  | 0.673974  |
| H | 0.933546  | 0.952719  | 1.430261  |
| H | 0.292500  | -0.670254 | 1.107000  |
| O | 2.145383  | -0.368442 | 0.391817  |
| H | 3.068106  | 1.440687  | 0.786869  |
| C | 6.882640  | -1.031829 | -0.074399 |
| H | 6.869899  | -2.042887 | 0.339841  |
| H | 7.250800  | -1.087235 | -1.101493 |
| H | 7.583639  | -0.432450 | 0.511350  |

A\_Ph\_C2H4O\_H\_Me\_conf15  
 SCF Energy: -688.152018935  
 Num. Imaginary Frequencies: 0

|   |           |           |           |
|---|-----------|-----------|-----------|
| C | 0.927245  | 0.019585  | 1.161503  |
| N | 0.366358  | 1.119215  | 1.567895  |
| N | -0.105248 | 2.091156  | 1.928006  |
| C | 2.066662  | 0.135028  | 0.247864  |
| C | 2.699303  | -1.023266 | -0.235667 |
| C | 2.562292  | 1.385192  | -0.167363 |
| C | 3.788338  | -0.930883 | -1.099442 |
| H | 2.344653  | -2.005022 | 0.060299  |
| C | 3.649915  | 1.468578  | -1.029560 |
| H | 2.095563  | 2.300659  | 0.185329  |
| C | 4.272533  | 0.312284  | -1.503247 |
| H | 4.258893  | -1.841305 | -1.457922 |
| H | 4.012434  | 2.445708  | -1.333721 |
| H | 5.120250  | 0.380528  | -2.176821 |
| C | -2.618784 | -1.330567 | -0.647761 |
| H | -2.085957 | -1.403482 | -1.607020 |
| C | -3.709117 | -0.358018 | -0.756000 |
| C | -4.616954 | 0.434116  | -0.855366 |
| C | 0.283164  | -1.275426 | 1.587850  |
| H | -0.285619 | -1.114045 | 2.508308  |
| H | 1.059187  | -2.011111 | 1.821062  |
| C | -0.654483 | -1.842527 | 0.529568  |
| H | -0.128746 | -1.972215 | -0.428738 |
| H | -1.037315 | -2.823130 | 0.848894  |
| O | -1.722893 | -0.927814 | 0.372881  |
| H | -3.028699 | -2.325121 | -0.418455 |

|   |           |          |           |
|---|-----------|----------|-----------|
| C | -5.712391 | 1.398486 | -0.973098 |
| H | -5.457536 | 2.327971 | -0.458244 |
| H | -5.908664 | 1.632888 | -2.022075 |
| H | -6.629397 | 1.002101 | -0.530941 |

A\_Ph\_C2H4O\_H\_Me\_conf1  
 SCF Energy: -688.150863371  
 Num. Imaginary Frequencies: 0

|   |           |           |           |
|---|-----------|-----------|-----------|
| C | -1.703442 | -1.027700 | 0.195050  |
| N | -2.530090 | -1.592421 | -0.633237 |
| N | -3.259306 | -2.083566 | -1.359491 |
| C | -1.631715 | 0.438379  | 0.184177  |
| C | -2.540161 | 1.213092  | -0.559865 |
| C | -0.651515 | 1.102307  | 0.940173  |
| C | -2.469268 | 2.602325  | -0.544773 |
| H | -3.312764 | 0.730174  | -1.152009 |
| C | -0.592468 | 2.493811  | 0.955195  |
| H | 0.085604  | 0.528287  | 1.489794  |
| C | -1.497495 | 3.254435  | 0.215589  |
| H | -3.182223 | 3.177381  | -1.127691 |
| H | 0.176164  | 2.984595  | 1.544637  |
| H | -1.445180 | 4.338157  | 0.227829  |
| C | 2.493663  | -1.694951 | -0.201130 |
| H | 2.995719  | -2.437921 | 0.435930  |
| C | 3.336819  | -0.504429 | -0.337553 |
| C | 4.039332  | 0.472231  | -0.456204 |
| C | -0.930852 | -1.955709 | 1.104140  |
| H | -1.545645 | -2.832944 | 1.330486  |
| H | -0.748728 | -1.445365 | 2.054974  |
| C | 0.392525  | -2.441626 | 0.528737  |
| H | 0.848616  | -3.174280 | 1.211625  |
| H | 0.227668  | -2.934003 | -0.442224 |
| O | 1.249586  | -1.328842 | 0.368042  |
| H | 2.334673  | -2.155470 | -1.187064 |
| C | 4.884805  | 1.658868  | -0.600633 |
| H | 5.350890  | 1.682250  | -1.588565 |
| H | 4.288011  | 2.566833  | -0.484182 |
| H | 5.674911  | 1.668751  | 0.153795  |

B\_Ph\_C2H4O\_H\_Me\_conf1  
 SCF Energy: -688.231775463  
 Num. Imaginary Frequencies: 0

|   |           |           |           |
|---|-----------|-----------|-----------|
| C | -0.293420 | 0.059862  | -0.642214 |
| N | -0.578900 | -1.011288 | -1.629334 |
| N | -1.556510 | -1.689307 | -1.248867 |
| C | 1.146927  | -0.121258 | -0.174916 |
| C | 2.201511  | 0.170226  | -1.048228 |
| C | 1.442547  | -0.632229 | 1.092004  |
| C | 3.522837  | -0.023894 | -0.653935 |
| H | 1.993728  | 0.535631  | -2.049291 |
| C | 2.766633  | -0.823368 | 1.489327  |
| H | 0.639588  | -0.890113 | 1.775558  |
| C | 3.810342  | -0.515582 | 0.620128  |
| H | 4.328324  | 0.205519  | -1.344327 |
| H | 2.977497  | -1.214812 | 2.479485  |
| H | 4.840375  | -0.662236 | 0.929001  |
| C | -1.571385 | 0.917575  | 1.423777  |
| H | -0.712248 | 0.993278  | 2.107082  |
| C | -1.351156 | -0.143763 | 0.394289  |

|   |           |           |           |
|---|-----------|-----------|-----------|
| C | -2.093263 | -1.185179 | -0.006841 |
| C | -0.679235 | 2.472652  | -0.123420 |
| H | 0.263791  | 2.521400  | 0.443142  |
| H | -0.894287 | 3.463466  | -0.527378 |
| C | -0.564490 | 1.451916  | -1.258238 |
| H | -1.510219 | 1.415285  | -1.809153 |
| H | 0.227372  | 1.741238  | -1.953124 |
| O | -1.751903 | 2.164688  | 0.754776  |
| H | -2.474193 | 0.739146  | 2.009832  |
| C | -3.311516 | -1.833597 | 0.551328  |
| H | -3.650144 | -1.319886 | 1.452509  |
| H | -4.119490 | -1.823391 | -0.185513 |
| H | -3.104997 | -2.878033 | 0.803012  |

B\_Ph\_C2H4O\_H\_Me\_conf2  
 SCF Energy: -688.231775470  
 Num. Imaginary Frequencies: 0

|   |           |           |           |
|---|-----------|-----------|-----------|
| C | -0.293489 | 0.059644  | -0.642182 |
| N | -0.578868 | -1.011914 | -1.628899 |
| N | -1.556485 | -1.689795 | -1.248179 |
| C | 1.146848  | -0.121338 | -0.174813 |
| C | 1.442507  | -0.631557 | 1.092388  |
| C | 2.201380  | 0.169469  | -1.048398 |
| C | 2.766601  | -0.822598 | 1.489711  |
| H | 0.639575  | -0.888949 | 1.776163  |
| C | 3.522710  | -0.024555 | -0.654104 |
| H | 1.993531  | 0.534241  | -2.049681 |
| C | 3.810267  | -0.515473 | 0.620238  |
| H | 2.977506  | -1.213461 | 2.480092  |
| H | 4.328165  | 0.204332  | -1.344712 |
| H | 4.840311  | -0.662060 | 0.929111  |
| C | -1.571654 | 0.918212  | 1.423422  |
| H | -0.712811 | 0.993777  | 2.107121  |
| C | -1.351291 | -0.143456 | 0.394278  |
| C | -2.093363 | -1.185060 | -0.006511 |
| C | -0.678694 | 2.472581  | -0.124163 |
| H | 0.264396  | 2.521092  | 0.442322  |
| H | -0.893363 | 3.463377  | -0.528368 |
| C | -0.564502 | 1.451479  | -1.258689 |
| H | -1.510400 | 1.414862  | -1.809318 |
| H | 0.227233  | 1.740360  | -1.953902 |
| O | -1.751461 | 2.165310  | 0.754154  |
| H | -2.474789 | 0.740257  | 2.009110  |
| C | -3.311562 | -1.833532 | 0.551697  |
| H | -3.650406 | -1.319710 | 1.452727  |
| H | -4.119475 | -1.823668 | -0.185228 |
| H | -3.104850 | -2.877866 | 0.803638  |

B\_Ph\_C2H4O\_H\_Me\_conf3  
 SCF Energy: -688.224181120  
 Num. Imaginary Frequencies: 0

|   |           |           |           |
|---|-----------|-----------|-----------|
| C | -0.314258 | 0.095926  | -0.648609 |
| N | -0.585564 | -0.993022 | -1.626705 |
| N | -1.544764 | -1.688696 | -1.234676 |
| C | 1.128676  | -0.093752 | -0.187017 |
| C | 1.433691  | -0.580743 | 1.085747  |
| C | 2.174190  | 0.155837  | -1.083700 |
| C | 2.760736  | -0.783898 | 1.468016  |
| H | 0.638747  | -0.807824 | 1.788503  |

|   |           |           |           |
|---|-----------|-----------|-----------|
| C | 3.497628  | -0.053027 | -0.705986 |
| H | 1.953841  | 0.503356  | -2.089066 |
| C | 3.796238  | -0.517839 | 0.575917  |
| H | 2.979905  | -1.152554 | 2.465136  |
| H | 4.296094  | 0.144322  | -1.414280 |
| H | 4.828155  | -0.675185 | 0.873065  |
| C | -1.534535 | 0.894897  | 1.471649  |
| H | -1.047085 | 0.604919  | 2.407552  |
| C | -1.357792 | -0.130362 | 0.396530  |
| C | -2.085310 | -1.184565 | 0.005424  |
| C | -1.265352 | 2.427873  | -0.282314 |
| H | -0.949514 | 3.459326  | -0.443673 |
| H | -2.357996 | 2.378819  | -0.392516 |
| C | -0.583201 | 1.485452  | -1.296117 |
| H | -1.234089 | 1.355896  | -2.165911 |
| H | 0.357764  | 1.913594  | -1.645243 |
| O | -0.919873 | 2.107605  | 1.058665  |
| H | -2.603269 | 1.058401  | 1.675242  |
| C | -3.285571 | -1.848333 | 0.585002  |
| H | -3.662658 | -1.288760 | 1.443149  |
| H | -4.078069 | -1.925527 | -0.164510 |
| H | -3.041391 | -2.862393 | 0.915659  |

B\_Ph\_C2H4O\_H\_Me\_conf4  
 SCF Energy: -688.224181050  
 Num. Imaginary Frequencies: 0

|   |           |           |           |
|---|-----------|-----------|-----------|
| C | -0.314202 | 0.096174  | -0.648595 |
| N | -0.585375 | -0.992551 | -1.626990 |
| N | -1.544434 | -1.688496 | -1.235099 |
| C | 1.128734  | -0.093577 | -0.187010 |
| C | 1.433750  | -0.580929 | 1.085617  |
| C | 2.174255  | 0.156320  | -1.083604 |
| C | 2.760804  | -0.784094 | 1.467861  |
| H | 0.638812  | -0.808285 | 1.788291  |
| C | 3.497697  | -0.052561 | -0.705919 |
| H | 1.953906  | 0.504118  | -2.088873 |
| C | 3.796309  | -0.517706 | 0.575866  |
| H | 2.979974  | -1.153014 | 2.464884  |
| H | 4.296165  | 0.145043  | -1.414139 |
| H | 4.828230  | -0.675050 | 0.872998  |
| C | -1.534608 | 0.894409  | 1.471889  |
| H | -1.046815 | 0.604449  | 2.407619  |
| C | -1.357684 | -0.130541 | 0.396501  |
| C | -2.085022 | -1.184777 | 0.005159  |
| C | -1.266285 | 2.427577  | -0.281957 |
| H | -0.951462 | 3.459353  | -0.443254 |
| H | -2.358870 | 2.377442  | -0.392249 |
| C | -0.583149 | 1.485896  | -1.295721 |
| H | -1.233417 | 1.356602  | -2.166016 |
| H | 0.357915  | 1.914516  | -1.643986 |
| O | -0.920580 | 2.107486  | 1.059003  |
| H | -2.603371 | 1.057392  | 1.675754  |
| C | -3.285121 | -1.848921 | 0.584648  |
| H | -3.040805 | -2.863153 | 0.914676  |
| H | -3.662022 | -1.289846 | 1.443198  |
| H | -4.077795 | -1.925738 | -0.164715 |

B\_Ph\_C2H4O\_H\_Me\_conf5  
 SCF Energy: -688.224181123  
 Num. Imaginary Frequencies: 0

|   |           |           |           |
|---|-----------|-----------|-----------|
| C | -0.314238 | -0.095837 | 0.648598  |
| N | -0.585498 | 0.993215  | 1.626580  |
| N | -1.544679 | 1.688882  | 1.234485  |
| C | 1.128689  | 0.093778  | 0.186964  |
| C | 1.433731  | 0.580395  | -1.085932 |
| C | 2.174167  | -0.155543 | 1.083761  |
| C | 2.760787  | 0.783463  | -1.468208 |
| H | 0.638801  | 0.807261  | -1.788775 |
| C | 3.497613  | 0.053240  | 0.706039  |
| H | 1.953759  | -0.502791 | 2.089210  |
| C | 3.796258  | 0.517696  | -0.575986 |
| H | 2.979992  | 1.151834  | -2.465426 |
| H | 4.296058  | -0.143884 | 1.414420  |
| H | 4.828182  | 0.674986  | -0.873138 |
| C | -1.534662 | -0.895047 | -1.471516 |
| H | -1.047218 | -0.605221 | -2.407470 |
| C | -1.357796 | 0.130331  | -0.396526 |
| C | -2.085252 | 1.184638  | -0.005548 |
| C | -1.265445 | -2.427807 | 0.282659  |
| H | -0.949665 | -3.459264 | 0.444106  |
| H | -2.358073 | -2.378658 | 0.392984  |
| C | -0.583095 | -1.485314 | 1.296251  |
| H | -1.233781 | -1.355680 | 2.166184  |
| H | 0.357954  | -1.913435 | 1.645190  |
| O | -0.920086 | -2.107757 | -1.058403 |
| H | -2.603420 | -1.058473 | -1.675055 |
| C | -3.285534 | 1.848346  | -0.585165 |
| H | -4.078081 | 1.925430  | 0.164307  |
| H | -3.041408 | 2.862445  | -0.915739 |
| H | -3.662527 | 1.288796  | -1.443367 |

B\_Ph\_C2H4O\_H\_Me\_conf6  
 SCF Energy: -688.224181091  
 Num. Imaginary Frequencies: 0

|   |           |           |           |
|---|-----------|-----------|-----------|
| C | -0.314316 | -0.096227 | 0.648675  |
| N | -0.585798 | 0.992277  | 1.627199  |
| N | -1.544908 | 1.688114  | 1.235340  |
| C | 1.128622  | 0.093669  | 0.187177  |
| C | 1.433513  | 0.581704  | -1.085231 |
| C | 2.174250  | -0.156676 | 1.083516  |
| C | 2.760510  | 0.785117  | -1.467514 |
| H | 0.638494  | 0.809383  | -1.787713 |
| C | 3.497656  | 0.052436  | 0.705792  |
| H | 1.954066  | -0.504964 | 2.088644  |
| C | 3.796124  | 0.518278  | -0.575767 |
| H | 2.979563  | 1.154587  | -2.464358 |
| H | 4.296199  | -0.145524 | 1.413826  |
| H | 4.828008  | 0.675814  | -0.872923 |
| C | -1.534296 | -0.894446 | -1.472031 |
| H | -1.046791 | -0.604042 | -2.407773 |
| C | -1.357705 | 0.130495  | -0.396567 |
| C | -2.085281 | 1.184541  | -0.005124 |
| C | -1.265096 | -2.428138 | 0.281316  |
| H | -0.949033 | -3.459579 | 0.442277  |
| H | -2.357771 | -2.379385 | 0.391366  |
| C | -0.583377 | -1.485945 | 1.295657  |
| H | -1.234637 | -1.356709 | 2.165221  |
| H | 0.357494  | -1.914058 | 1.645058  |
| O | -0.919541 | -2.107267 | -1.059462 |
| H | -2.602985 | -1.058011 | -1.675755 |

|   |           |          |           |
|---|-----------|----------|-----------|
| C | -3.285503 | 1.848577 | -0.584486 |
| H | -3.041677 | 2.863306 | -0.913310 |
| H | -3.661733 | 1.290162 | -1.443757 |
| H | -4.078534 | 1.924092 | 0.164640  |

B\_Ph\_C2H4O\_H\_Me\_conf7  
 SCF Energy: -688.224181088  
 Num. Imaginary Frequencies: 0

|   |           |           |           |
|---|-----------|-----------|-----------|
| C | -0.314300 | 0.096075  | -0.648655 |
| N | -0.585616 | -0.992757 | -1.626877 |
| N | -1.544784 | -1.688505 | -1.234879 |
| C | 1.128635  | -0.093709 | -0.187081 |
| C | 2.174183  | 0.156002  | -1.083694 |
| C | 1.433609  | -0.580952 | 1.085601  |
| C | 3.497609  | -0.052912 | -0.705965 |
| H | 1.953884  | 0.503681  | -2.089014 |
| C | 2.760644  | -0.784152 | 1.467888  |
| H | 0.638650  | -0.808193 | 1.788288  |
| C | 3.796178  | -0.517916 | 0.575880  |
| H | 4.296099  | 0.144563  | -1.414197 |
| H | 2.979777  | -1.152977 | 2.464954  |
| H | 4.828087  | -0.675276 | 0.873047  |
| C | -1.534342 | 0.894745  | 1.471814  |
| H | -1.046823 | 0.604631  | 2.407637  |
| C | -1.357774 | -0.130359 | 0.396505  |
| C | -2.085282 | -1.184535 | 0.005321  |
| C | -1.265538 | 2.427772  | -0.281999 |
| H | -0.950209 | 3.459380  | -0.443374 |
| H | -2.358182 | 2.378226  | -0.391958 |
| C | -0.583237 | 1.485691  | -1.295980 |
| H | -1.234069 | 1.356321  | -2.165840 |
| H | 0.357709  | 1.913975  | -1.644970 |
| O | -0.919625 | 2.107444  | 1.058856  |
| H | -2.603049 | 1.058298  | 1.675534  |
| C | -3.285454 | -1.848450 | 0.584914  |
| H | -4.078092 | -1.925408 | -0.164473 |
| H | -3.041221 | -2.862614 | 0.915214  |
| H | -3.662356 | -1.289122 | 1.443297  |

B\_Ph\_C2H4O\_H\_Me  
 SCF Energy: -688.231775477  
 Num. Imaginary Frequencies: 0

|   |           |           |           |
|---|-----------|-----------|-----------|
| C | -0.293408 | 0.059777  | -0.642191 |
| N | -0.578877 | -1.011449 | -1.629239 |
| N | -1.556504 | -1.689431 | -1.248734 |
| C | 1.146940  | -0.121288 | -0.174879 |
| C | 2.201501  | 0.169963  | -1.048299 |
| C | 1.442600  | -0.631962 | 1.092152  |
| C | 3.522838  | -0.024075 | -0.654007 |
| H | 1.993682  | 0.535112  | -2.049448 |
| C | 2.766700  | -0.823012 | 1.489478  |
| H | 0.639671  | -0.889687 | 1.775800  |
| C | 3.810383  | -0.515448 | 0.620170  |
| H | 4.328301  | 0.205154  | -1.344487 |
| H | 2.977594  | -1.214215 | 2.479724  |
| H | 4.840425  | -0.662033 | 0.929045  |
| C | -1.571468 | 0.917686  | 1.423668  |
| H | -0.712378 | 0.993495  | 2.107018  |
| C | -1.351158 | -0.143757 | 0.394306  |

|   |           |           |           |
|---|-----------|-----------|-----------|
| C | -2.093264 | -1.185199 | -0.006755 |
| C | -0.679261 | 2.472620  | -0.123634 |
| H | 0.263738  | 2.521431  | 0.442968  |
| H | -0.894305 | 3.463394  | -0.527695 |
| C | -0.564463 | 1.451780  | -1.258351 |
| H | -1.510174 | 1.415101  | -1.809294 |
| H | 0.227425  | 1.741033  | -1.953237 |
| O | -1.751979 | 2.164722  | 0.754525  |
| H | -2.474308 | 0.739299  | 2.009695  |
| C | -3.311524 | -1.833531 | 0.551496  |
| H | -3.650241 | -1.319578 | 1.452509  |
| H | -4.119448 | -1.823567 | -0.185404 |
| H | -3.104976 | -2.877886 | 0.803490  |

C\_Ph\_C2H4O\_H\_Me\_conf2  
 SCF Energy: -688.247856916  
 Num. Imaginary Frequencies: 0

|   |           |           |           |
|---|-----------|-----------|-----------|
| C | 1.390373  | -0.004775 | -0.950283 |
| N | 2.028087  | 1.035588  | -1.351261 |
| N | 1.685167  | 2.135010  | -0.499422 |
| C | -0.924348 | 0.000671  | 0.079791  |
| C | -1.628073 | -0.960360 | 0.808027  |
| C | -1.605980 | 0.757629  | -0.882070 |
| C | -2.994353 | -1.148921 | 0.587542  |
| H | -1.118346 | -1.580287 | 1.537178  |
| C | -2.966858 | 0.568528  | -1.102851 |
| H | -1.063669 | 1.504769  | -1.458902 |
| C | -3.667283 | -0.387017 | -0.364161 |
| H | -3.528708 | -1.899164 | 1.161841  |
| H | -3.479726 | 1.166133  | -1.849712 |
| H | -4.728875 | -0.536723 | -0.532807 |
| C | 1.232272  | -0.600666 | 1.378927  |
| H | 0.664007  | -0.554929 | 2.310997  |
| C | 0.562750  | 0.263292  | 0.276929  |
| C | 0.885271  | 1.728239  | 0.423568  |
| C | 2.115642  | -2.170344 | -0.149410 |
| H | 2.117149  | -3.246052 | -0.328168 |
| H | 3.139443  | -1.842405 | 0.080609  |
| C | 1.594795  | -1.409123 | -1.387993 |
| H | 2.313023  | -1.469732 | -2.208409 |
| H | 0.642164  | -1.849227 | -1.702177 |
| O | 1.281916  | -1.953184 | 0.978980  |
| H | 2.246372  | -0.217060 | 1.563706  |
| C | 0.335461  | 2.609472  | 1.490501  |
| H | 0.703895  | 3.628350  | 1.368106  |
| H | -0.758706 | 2.610078  | 1.450549  |
| H | 0.625857  | 2.237779  | 2.479036  |

D\_Ph\_C2H4O\_H\_Me\_conf3  
 SCF Energy: -688.273427670  
 Num. Imaginary Frequencies: 0

|   |           |           |           |
|---|-----------|-----------|-----------|
| C | -0.820995 | -0.392450 | 0.043504  |
| N | 0.229846  | 0.474698  | 0.113464  |
| N | -0.191252 | 1.761868  | 0.172375  |
| C | 1.617348  | 0.186621  | 0.068485  |
| C | 2.474546  | 1.059360  | -0.605807 |
| C | 2.118280  | -0.953607 | 0.698530  |
| C | 3.837233  | 0.779328  | -0.652291 |
| H | 2.064220  | 1.942413  | -1.082026 |

|                               |           |           |           |   |           |           |           |
|-------------------------------|-----------|-----------|-----------|---|-----------|-----------|-----------|
| C                             | 3.482358  | -1.231996 | 0.629804  | N | 1.686206  | -2.294616 | -0.067571 |
| H                             | 1.455113  | -1.604632 | 1.256978  | C | -1.427908 | -0.427522 | -0.009410 |
| C                             | 4.345725  | -0.368975 | -0.042995 | C | -2.468235 | -1.362943 | 0.108296  |
| H                             | 4.503104  | 1.458182  | -1.175337 | C | -1.742621 | 0.934693  | -0.109609 |
| H                             | 3.869526  | -2.119230 | 1.120213  | C | -3.792697 | -0.943439 | 0.122684  |
| H                             | 5.407843  | -0.585829 | -0.087963 | H | -2.221303 | -2.416074 | 0.189081  |
| C                             | -3.325704 | -0.249673 | -0.021934 | C | -3.073955 | 1.350434  | -0.095917 |
| H                             | -3.792042 | -0.028034 | -0.994762 | H | -0.955972 | 1.678130  | -0.202844 |
| C                             | -1.964203 | 0.370230  | 0.072622  | C | -4.100389 | 0.415930  | 0.020274  |
| C                             | -1.518068 | 1.712340  | 0.150016  | H | -4.588378 | -1.675707 | 0.215616  |
| C                             | -2.218172 | -2.248179 | -0.648576 | H | -3.305377 | 2.407644  | -0.176676 |
| H                             | -2.331008 | -1.920031 | -1.692355 | H | -5.135490 | 0.742276  | 0.032333  |
| H                             | -2.374806 | -3.326918 | -0.600833 | C | 1.334807  | 0.993464  | -1.185456 |
| C                             | -0.822239 | -1.877578 | -0.131093 | H | 0.539073  | 0.893154  | -1.925984 |
| H                             | -0.638339 | -2.391769 | 0.818554  | C | 1.204540  | -0.028762 | -0.008829 |
| H                             | -0.054903 | -2.202137 | -0.842264 | C | 2.230913  | -1.129474 | -0.046981 |
| O                             | -3.234381 | -1.659426 | 0.150945  | C | 1.884163  | 2.183877  | 0.664918  |
| H                             | -3.994950 | 0.112269  | 0.763427  | H | 1.621408  | 3.068457  | 1.246055  |
| C                             | -2.344656 | 2.956970  | 0.211111  | H | 2.975979  | 2.141556  | 0.539458  |
| H                             | -2.974686 | 3.051385  | -0.678637 | C | 1.343614  | 0.877778  | 1.251605  |
| H                             | -3.004776 | 2.945507  | 1.083705  | H | 1.999743  | 0.439868  | 2.006866  |
| H                             | -1.698124 | 3.833929  | 0.274614  | H | 0.361726  | 1.040177  | 1.702130  |
|                               |           |           |           | O | 1.252441  | 2.280921  | -0.603819 |
|                               |           |           |           | H | 2.304791  | 0.867886  | -1.682658 |
|                               |           |           |           | C | 3.707091  | -0.924472 | -0.032600 |
|                               |           |           |           | H | 4.006096  | -0.318883 | 0.829387  |
|                               |           |           |           | H | 4.214107  | -1.888550 | 0.016956  |
|                               |           |           |           | H | 4.038913  | -0.396483 | -0.932490 |
| E_Ph_C2H4O_H_Me_conf1         |           |           |           |   |           |           |           |
| SCF Energy: -688.247090204    |           |           |           |   |           |           |           |
| Num. Imaginary Frequencies: 0 |           |           |           |   |           |           |           |
| C                             | -0.030236 | -0.894405 | -0.029491 |   |           |           |           |
| N                             | 0.272455  | -2.148495 | -0.064369 |   |           |           |           |

R1Ph\_R2Ph\_XO:

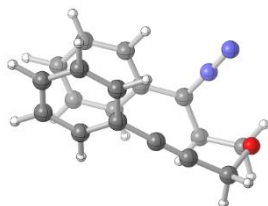

| FILE                  | SCF E       | SCF+ZPVE    | H           | TS         | G           |
|-----------------------|-------------|-------------|-------------|------------|-------------|
| A_R1Ph_R2Ph_XO_conf8  | -552101.253 | -551913.482 | -551901.287 | 42.8896394 | 551944.1767 |
| A_R1Ph_R2Ph_XO_conf3  | -552101.253 | -551913.482 | -551901.288 | 42.8821093 | 551944.1698 |
| A_R1Ph_R2Ph_XO_conf13 | -552098.384 | -551910.855 | -551898.387 | 45.4737231 | 551943.8606 |
| A_R1Ph_R2Ph_XO_conf9  | -552096.883 | -551909.559 | -551896.903 | 46.8868742 | 551943.7897 |
| A_R1Ph_R2Ph_XO_conf10 | -552098.351 | -551910.807 | -551898.351 | 45.2158167 | 551943.5668 |
| A_R1Ph_R2Ph_XO_conf1  | -552097.935 | -551910.451 | -551897.967 | 45.5609469 | 551943.5284 |
| A_R1Ph_R2Ph_XO_conf11 | -552097.559 | -551909.959 | -551897.517 | 45.8571313 | 551943.3738 |
| A_R1Ph_R2Ph_XO_conf7  | -552100.439 | -551912.699 | -551900.491 | 42.6361256 | -551943.127 |
| A_R1Ph_R2Ph_XO_conf17 | -552097.099 | -551909.511 | -551897.02  | 46.0547968 | 551943.0748 |
| A_R1Ph_R2Ph_XO_conf14 | -552097.099 | -551909.511 | -551897.02  | 46.0541693 | 551943.0742 |
| A_R1Ph_R2Ph_XO_conf16 | -552097.099 | -551909.511 | -551897.02  | 46.0460117 | -551943.066 |
| A_R1Ph_R2Ph_XO        | -552097.023 | -551909.68  | -551897.047 | 45.8496012 | 551942.8962 |
| A_R1Ph_R2Ph_XO_conf15 | -552098.387 | -551910.726 | -551898.395 | 44.164111  | 551942.5593 |
| A_R1Ph_R2Ph_XO_conf6  | -552097.043 | -551909.341 | -551897.031 | 44.1258329 | 551941.1568 |
| A_R1Ph_R2Ph_XO_conf2  | -552097.205 | -551909.567 | -551897.31  | 43.4669481 | 551940.7774 |
| A_R1Ph_R2Ph_XO_conf4  | -552097.205 | -551909.566 | -551897.31  | 43.4581629 | 551940.7687 |
| B_R1Ph_R2Ph_XO_conf1  | -552148.672 | -551957.756 | -551947.144 | 38.4669532 | 551985.6107 |
| B_R1Ph_R2Ph_XO        | -552148.672 | -551957.756 | -551947.144 | 38.4644432 | 551985.6082 |
| B_R1Ph_R2Ph_XO_conf2  | -552147.568 | -551956.694 | -551946.065 | 38.7173295 | 551984.7827 |
| B_R1Ph_R2Ph_XO_conf3  | -552147.568 | -551956.694 | -551946.065 | 38.716702  | 551984.7815 |
| B_R1Ph_R2Ph_XO_conf8  | -552144.805 | -551954.155 | -551943.376 | 39.4395928 | 551982.8155 |
| B_R1Ph_R2Ph_XO_conf9  | -552144.805 | -551954.155 | -551943.377 | 39.4358277 | -551982.813 |
| B_R1Ph_R2Ph_XO_conf7  | -552144.805 | -551954.154 | -551943.376 | 39.4364552 | 551982.8123 |
| B_R1Ph_R2Ph_XO_conf6  | -552144.805 | -551954.154 | -551943.377 | 39.4352002 | 551982.8117 |
| B_R1Ph_R2Ph_XO_conf4  | -552144.805 | -551954.155 | -551943.377 | 39.4326902 | 551982.8099 |
| B_R1Ph_R2Ph_XO_conf5  | -552145.245 | -551954.483 | -551943.777 | 38.9438604 | 551982.7206 |
| C_R1Ph_R2Ph_XO_conf2  | -552159.262 | -551968.228 | -551957.607 | 38.4280476 | 551996.0351 |
| C_R1Ph_R2Ph_XO_conf1  | -552159.262 | -551968.228 | -551957.607 | 38.4274201 | 551996.0345 |
| C_R1Ph_R2Ph_XO_conf3  | -552159.262 | -551968.228 | -551957.607 | 38.4267926 | 551996.0339 |
| C_R1Ph_R2Ph_XO        | -552152.08  | -551961.351 | -551950.555 | 39.1076403 | 551989.6631 |
| C_R1Ph_R2Ph_XO_conf4  | -552151.884 | -551961.194 | -551950.36  | 39.0800299 | 551989.4396 |
| D_R1Ph_R2Ph_XO_conf7  | -552175.707 | -551984.032 | -551973.406 | 38.6263406 | 552012.0327 |
| D_R1Ph_R2Ph_XO_conf2  | -552175.707 | -551984.032 | -551973.406 | 38.6244581 | 552012.0308 |
| D_R1Ph_R2Ph_XO_conf5  | -552175.707 | -551984.031 | -551973.406 | 38.6244581 | 552012.0308 |
| D_R1Ph_R2Ph_XO_conf4  | -552174.843 | -551983.381 | -551972.669 | 39.0241816 | 552011.6935 |

|                      |             |             |             |            |             |
|----------------------|-------------|-------------|-------------|------------|-------------|
| D_R1Ph_R2Ph_XO       | -552174.843 | -551983.38  | -551972.669 | 39.0235541 | 552011.6929 |
| D_R1Ph_R2Ph_XO_conf1 | -552174.843 | -551983.381 | -551972.67  | 39.022299  | 552011.6922 |
| D_R1Ph_R2Ph_XO_conf3 | -552174.843 | -551983.381 | -551972.669 | 39.0229265 | 552011.6922 |
| D_R1Ph_R2Ph_XO_conf6 | -552174.843 | -551983.38  | -551972.669 | 39.0216715 | 552011.691  |
| E_R1Ph_R2Ph_XO_conf4 | -552156.469 | -551965.442 | -551954.683 | 38.8378113 | 551993.5203 |
| E_R1Ph_R2Ph_XO       | -552156.469 | -551965.442 | -551954.683 | 38.8365563 | 551993.5197 |
| E_R1Ph_R2Ph_XO_conf3 | -552156.469 | -551965.442 | -551954.683 | 38.8365563 | 551993.5191 |
| E_R1Ph_R2Ph_XO_conf2 | -552156.469 | -551965.441 | -551954.682 | 38.8353012 | 551993.5172 |
| E_R1Ph_R2Ph_XO_conf1 | -552156.469 | -551965.441 | -551954.682 | 38.8353012 | 551993.5172 |
| TS_A_B_R1Ph_R2Ph_XO  | -552079.552 | -551891.772 | -551880.424 | 40.5076138 | 551920.9315 |
| TS_B_C_R1Ph_R2Ph_XO  | -552116.485 | -551926.611 | -551916.29  | 37.3060608 | 551953.5964 |
| TS_B_D_R1Ph_R2Ph_XO  | -552115.861 | -551926.463 | -551916.007 | 37.9511405 | 551953.9578 |
| TS_B_E_R1Ph_R2Ph_XO  | -552120.995 | -551931.229 | -551920.765 | 38.0007137 | 551958.7658 |

A\_R1Ph\_R2Ph\_XO\_conf8  
SCF Energy: -879.829465954  
Num. Imaginary Frequencies: 0

SCF Energy: -879.905033195  
Num. Imaginary Frequencies: 0

|   |           |           |           |   |           |           |           |
|---|-----------|-----------|-----------|---|-----------|-----------|-----------|
| C | 1.561798  | 1.125861  | 0.376393  | C | -1.062916 | 0.565243  | 0.631729  |
| N | 1.894400  | 0.659128  | 1.539471  | N | -0.577256 | 0.051936  | 1.936073  |
| N | 2.159333  | 0.253721  | 2.572018  | N | 0.621975  | -0.281393 | 1.845759  |
| C | 0.185152  | 1.593210  | 0.200127  | C | -2.239963 | -0.309929 | 0.208421  |
| C | -0.189547 | 2.201934  | -1.008704 | C | -2.124123 | -1.238837 | -0.829223 |
| C | -0.791109 | 1.438243  | 1.201528  | C | -3.447867 | -0.227828 | 0.911213  |
| C | -1.496951 | 2.644308  | -1.205050 | C | -3.203992 | -2.051669 | -1.176976 |
| H | 0.541292  | 2.338631  | -1.799268 | H | -1.187955 | -1.339404 | -1.369718 |
| C | -2.091849 | 1.882165  | 0.997972  | C | -4.523922 | -1.041726 | 0.567482  |
| H | -0.535751 | 0.954199  | 2.140521  | H | -3.546820 | 0.462060  | 1.743710  |
| C | -2.455290 | 2.489847  | -0.206154 | C | -4.407553 | -1.952594 | -0.483495 |
| H | -1.763060 | 3.113428  | -2.147656 | H | -3.098713 | -2.763031 | -1.989927 |
| H | -2.830264 | 1.742148  | 1.781807  | H | -5.452719 | -0.967113 | 1.124075  |
| H | -3.473737 | 2.830209  | -0.363437 | H | -5.247874 | -2.583806 | -0.754133 |
| C | 2.954148  | -1.906490 | -0.907724 | C | 0.154675  | 1.204195  | -1.553009 |
| H | 3.242057  | -1.650389 | -1.936592 | H | -0.521965 | 0.720852  | -2.274116 |
| C | 1.488307  | -1.867442 | -0.765581 | C | 0.150227  | 0.485018  | -0.239876 |
| C | 0.293635  | -1.788558 | -0.581129 | C | 1.131912  | -0.035827 | 0.516756  |
| C | 2.559567  | 1.051986  | -0.751854 | C | -1.509921 | 2.644448  | -0.668196 |
| H | 2.864993  | 2.060106  | -1.062113 | H | -2.288911 | 2.130326  | -1.252282 |
| H | 2.056835  | 0.597969  | -1.615941 | H | -1.750523 | 3.708084  | -0.625906 |
| C | 3.830261  | 0.270721  | -0.428559 | C | -1.429651 | 2.061910  | 0.743532  |
| H | 4.471499  | 0.261063  | -1.320316 | H | -0.642983 | 2.578792  | 1.303133  |
| H | 4.383898  | 0.753981  | 0.381571  | H | -2.375956 | 2.199571  | 1.271647  |
| O | 3.607718  | -1.057124 | 0.020794  | O | -0.262302 | 2.549868  | -1.338125 |
| H | 3.310685  | -2.919713 | -0.704304 | H | 1.155928  | 1.254360  | -1.983438 |
| C | -1.119161 | -1.671287 | -0.346298 | C | 2.539630  | -0.328224 | 0.224520  |
| C | -1.930877 | -0.972038 | -1.251163 | C | 2.932469  | -0.729092 | -1.059564 |
| C | -3.294593 | -0.843263 | -1.007785 | C | 4.273709  | -0.979340 | -1.339055 |
| C | -3.860547 | -1.406872 | 0.136224  | C | 5.233857  | -0.844784 | -0.335991 |
| C | -3.056588 | -2.102489 | 1.040680  | C | 4.846667  | -0.464096 | 0.949674  |
| C | -1.691768 | -2.237411 | 0.803077  | C | 3.507313  | -0.208592 | 1.231438  |
| H | -1.481810 | -0.521104 | -2.130442 | H | 2.181999  | -0.872261 | -1.831996 |
| H | -3.914956 | -0.291972 | -1.707462 | H | 4.566884  | -1.291840 | -2.336147 |
| H | -4.924379 | -1.301707 | 0.324677  | H | 6.278350  | -1.044579 | -0.552910 |
| H | -3.493247 | -2.540712 | 1.932539  | H | 5.589897  | -0.364770 | 1.734336  |
| H | -1.059448 | -2.773622 | 1.503640  | H | 3.203436  | 0.090345  | 2.229555  |

B\_R1Ph\_R2Ph\_XO\_conf1

C\_R1Ph\_R2Ph\_XO\_conf2  
SCF Energy: -879.921908602

Num. Imaginary Frequencies: 0

|   |           |           |           |
|---|-----------|-----------|-----------|
| C | 1.533310  | -1.446591 | 0.809989  |
| N | 0.855040  | -2.183396 | 1.616420  |
| N | -0.524640 | -1.886213 | 1.450286  |
| C | 0.960641  | 0.913776  | 0.137126  |
| C | 1.519268  | 1.701068  | -0.872246 |
| C | 0.673627  | 1.498801  | 1.376394  |
| C | 1.767194  | 3.056980  | -0.648984 |
| H | 1.775408  | 1.263866  | -1.831201 |
| C | 0.924087  | 2.849702  | 1.598998  |
| H | 0.243077  | 0.891634  | 2.170305  |
| C | 1.469709  | 3.635529  | 0.582642  |
| H | 2.197983  | 3.658107  | -1.443529 |
| H | 0.690636  | 3.288497  | 2.563810  |
| H | 1.663209  | 4.689867  | 0.752128  |
| C | 0.890539  | -1.110363 | -1.487705 |
| H | 0.383983  | -0.484695 | -2.226599 |
| C | 0.659959  | -0.569709 | -0.047037 |
| C | -0.672200 | -1.000460 | 0.520674  |
| C | 3.034211  | -1.985311 | -1.004294 |
| H | 4.056041  | -1.932099 | -1.381271 |
| H | 2.660660  | -3.012730 | -1.119381 |
| C | 2.975046  | -1.575394 | 0.482997  |
| H | 3.457412  | -2.326765 | 1.111559  |
| H | 3.481439  | -0.612221 | 0.607521  |
| O | 2.264532  | -1.104281 | -1.807224 |
| H | 0.484231  | -2.130218 | -1.550492 |
| C | -1.993713 | -0.511446 | 0.096885  |
| C | -3.156231 | -1.081487 | 0.639269  |
| C | -4.409082 | -0.635489 | 0.236794  |
| C | -4.521190 | 0.383992  | -0.712736 |
| C | -3.372201 | 0.954472  | -1.255946 |
| C | -2.113190 | 0.510696  | -0.853670 |
| H | -3.060706 | -1.875706 | 1.371921  |
| H | -5.301866 | -1.083560 | 0.661052  |
| H | -5.501015 | 0.730244  | -1.025934 |
| H | -3.451743 | 1.748228  | -1.991533 |
| H | -1.226519 | 0.976456  | -1.272410 |

D\_R1Ph\_R2Ph\_XO\_conf7

SCF Energy: -879.948115312

Num. Imaginary Frequencies: 0

|   |           |           |           |
|---|-----------|-----------|-----------|
| C | 0.718584  | 1.176993  | 0.045043  |
| N | 1.060667  | -0.143042 | 0.062263  |
| N | -0.024754 | -0.940579 | 0.042860  |
| C | 2.359047  | -0.718258 | 0.017959  |
| C | 3.402739  | -0.149280 | 0.747823  |
| C | 2.570159  | -1.859871 | -0.757470 |
| C | 4.673750  | -0.717390 | 0.679753  |
| H | 3.221199  | 0.711845  | 1.380922  |
| C | 3.840518  | -2.426967 | -0.804567 |
| H | 1.741173  | -2.286207 | -1.310813 |
| C | 4.896980  | -1.855300 | -0.093777 |
| H | 5.485559  | -0.275088 | 1.247829  |
| H | 4.006277  | -3.314338 | -1.406809 |
| H | 5.886686  | -2.297556 | -0.138787 |
| C | -1.373528 | 2.551687  | 0.009042  |
| H | -2.169736 | 2.590081  | 0.757832  |
| C | -0.656457 | 1.231385  | 0.023871  |
| C | -1.077710 | -0.125159 | 0.024496  |

|   |           |           |           |
|---|-----------|-----------|-----------|
| C | 0.720457  | 3.551453  | -0.444374 |
| H | 1.231384  | 4.502801  | -0.289528 |
| H | 0.467261  | 3.454540  | -1.510298 |
| C | 1.605021  | 2.379884  | -0.003509 |
| H | 2.435296  | 2.241666  | -0.704455 |
| H | 2.030151  | 2.598807  | 0.981887  |
| O | -0.471111 | 3.602300  | 0.327687  |
| H | -1.821016 | 2.748289  | -0.978054 |
| C | -2.445804 | -0.672957 | 0.035366  |
| C | -2.685075 | -1.972593 | 0.504342  |
| C | -3.975647 | -2.493018 | 0.513826  |
| C | -5.049152 | -1.723500 | 0.060393  |
| C | -4.819865 | -0.430598 | -0.407272 |
| C | -3.526808 | 0.090603  | -0.421938 |
| H | -1.850293 | -2.564616 | 0.865315  |
| H | -4.146191 | -3.499976 | 0.881988  |
| H | -6.055687 | -2.129429 | 0.072195  |
| H | -5.646352 | 0.173501  | -0.768181 |
| H | -3.361474 | 1.089948  | -0.812443 |

E\_R1Ph\_R2Ph\_XO\_conf4

SCF Energy: -879.917458022

Num. Imaginary Frequencies: 0

|   |           |           |           |
|---|-----------|-----------|-----------|
| C | -1.109788 | -0.805934 | -0.033996 |
| N | -0.664832 | -2.018974 | -0.046379 |
| N | 0.741014  | -2.008894 | -0.020833 |
| C | -2.559385 | -0.533422 | -0.011995 |
| C | -3.077725 | 0.753089  | -0.211044 |
| C | -3.447108 | -1.598644 | 0.215829  |
| C | -4.456163 | 0.966276  | -0.188084 |
| H | -2.413004 | 1.590241  | -0.397776 |
| C | -4.818819 | -1.380171 | 0.239314  |
| H | -3.044926 | -2.592944 | 0.376273  |
| C | -5.329305 | -0.095146 | 0.037015  |
| H | -4.844577 | 1.966996  | -0.348129 |
| H | -5.492855 | -2.211615 | 0.419191  |
| H | -6.401141 | 0.074834  | 0.057428  |
| C | 0.070412  | 1.164286  | -1.227351 |
| H | -0.539964 | 0.817927  | -2.064054 |
| C | 0.023512  | 0.198504  | -0.000554 |
| C | 1.168486  | -0.790670 | 0.012716  |
| C | -0.035630 | 2.579447  | 0.570749  |
| H | -0.733371 | 3.273808  | 1.042134  |
| H | 0.967644  | 3.023248  | 0.598457  |
| C | -0.060406 | 1.178540  | 1.211061  |
| H | 0.761078  | 1.026913  | 1.913902  |
| H | -0.996313 | 1.017384  | 1.749885  |
| O | -0.450617 | 2.397864  | -0.775899 |
| H | 1.108285  | 1.282879  | -1.563091 |
| C | 2.613498  | -0.498076 | 0.021821  |
| C | 3.111443  | 0.792304  | 0.240588  |
| C | 4.484775  | 1.032496  | 0.248820  |
| C | 5.378735  | -0.014182 | 0.038341  |
| C | 4.892369  | -1.305540 | -0.182317 |
| C | 3.524371  | -1.546538 | -0.191405 |
| H | 2.436660  | 1.622409  | 0.409631  |
| H | 4.851451  | 2.039119  | 0.421023  |
| H | 6.447799  | 0.172607  | 0.043200  |
| H | 5.583293  | -2.125254 | -0.351083 |
| H | 3.141977  | -2.546081 | -0.366369 |



R1Ph\_R2Me\_XNH:

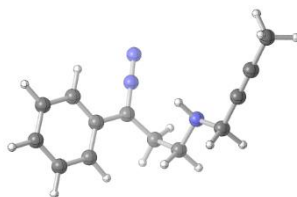

| FILE                   | SCF E       | SCF+ZPVE    | H           | TS         | G           |
|------------------------|-------------|-------------|-------------|------------|-------------|
| A_R1Ph_R2Me_XNH_conf2  | -419361.104 | -419199.344 | -419188.557 | 40.3419513 | 419228.8991 |
| A_R1Ph_R2Me_XNH_conf1  | -419360.603 | -419198.958 | -419188.139 | 40.6720212 | 419228.8108 |
| A_R1Ph_R2Me_XNH_conf12 | -419360.405 | -419198.76  | -419187.899 | 40.7172019 | 419228.6159 |
| A_R1Ph_R2Me_XNH_conf15 | -419360.67  | -419199.006 | -419188.205 | 40.2766903 | 419228.4816 |
| A_R1Ph_R2Me_XNH_conf14 | -419360.03  | -419198.296 | -419187.469 | 40.8803543 | 419228.3495 |
| A_R1Ph_R2Me_XNH_conf10 | -419359.996 | -419198.326 | -419187.482 | 40.8307811 | 419228.3128 |
| A_R1Ph_R2Me_XNH_conf11 | -419360.013 | -419198.291 | -419187.488 | 40.3758368 | 419227.8639 |
| A_R1Ph_R2Me_XNH        | -419359.737 | -419198.152 | -419187.223 | 40.6048777 | 419227.8279 |
| A_R1Ph_R2Me_XNH_conf4  | -419359.669 | -419197.951 | -419187.124 | 40.4912985 | 419227.6155 |
| A_R1Ph_R2Me_XNH_conf17 | -419359.673 | -419197.989 | -419187.173 | 40.3965446 | 419227.5693 |
| A_R1Ph_R2Me_XNH_conf3  | -419362.218 | -419200.204 | -419189.755 | 37.753475  | 419227.5088 |
| A_R1Ph_R2Me_XNH_conf9  | -419360.67  | -419199.061 | -419188.802 | 38.6583436 | 419227.4602 |
| A_R1Ph_R2Me_XNH_conf5  | -419359.486 | -419197.832 | -419187.091 | 40.3250085 | 419227.4165 |
| A_R1Ph_R2Me_XNH_conf13 | -419359.729 | -419198.094 | -419187.224 | 40.1173029 | 419227.3413 |
| A_R1Ph_R2Me_XNH_conf6  | -419359.736 | -419198.201 | -419187.818 | 38.9463704 | 419226.7639 |
| A_R1Ph_R2Me_XNH_conf7  | -419359.111 | -419197.226 | -419186.638 | 38.6344982 | 419225.2727 |
| A_R1Ph_R2Me_XNH_conf16 | -419359.146 | -419197.331 | -419186.76  | 38.3709443 | 419225.1306 |
| A_R1Ph_R2Me_XNH_conf8  | -419355.293 | -419193.399 | -419182.868 | 39.8725743 | 419222.7404 |
| B_R1Ph_R2Me_XNH_conf1  | -419411.841 | -419246.67  | -419237.849 | 33.7662804 | 419271.6154 |
| B_R1Ph_R2Me_XNH_conf2  | -419411.5   | -419246.359 | -419237.527 | 33.9187651 | 419271.446  |
| B_R1Ph_R2Me_XNH        | -419410.676 | -419245.587 | -419236.766 | 33.7631428 | 419270.5294 |
| B_R1Ph_R2Me_XNH_conf5  | -419405.97  | -419241.141 | -419232.162 | 34.3881422 | 419266.5497 |
| B_R1Ph_R2Me_XNH_conf4  | -419405.97  | -419241.141 | -419232.161 | 34.3881422 | 419266.5491 |
| B_R1Ph_R2Me_XNH_conf6  | -419405.697 | -419240.976 | -419231.966 | 34.573885  | 419266.5398 |

|                        |             |             |             |            |             |
|------------------------|-------------|-------------|-------------|------------|-------------|
| B_R1Ph_R2Me_XNH_conf3  | -419405.698 | -419240.976 | -419231.966 | 34.5650998 | -419266.531 |
| C_R1Ph_R2Me_XNH_conf4  | -419421.711 | -419256.588 | -419247.719 | 34.3674344 | 419282.0859 |
| C_R1Ph_R2Me_XNH_conf1  | -419421.746 | -419256.585 | -419247.738 | 33.9375904 | 419281.6753 |
| C_R1Ph_R2Me_XNH_conf2  | -419421.746 | -419256.585 | -419247.738 | 33.9357079 | 419281.6734 |
| C_R1Ph_R2Me_XNH_conf5  | -419420.575 | -419255.532 | -419246.691 | 33.7838506 | -419280.475 |
| C_R1Ph_R2Me_XNH_conf3  | -419420.575 | -419255.531 | -419246.691 | 33.7825956 | 419280.4737 |
| C_R1Ph_R2Me_XNH_conf6  | -419420.575 | -419255.531 | -419246.691 | 33.7825956 | 419280.4737 |
| C_R1Ph_R2Me_XNH_conf8  | -419414.612 | -419249.716 | -419240.672 | 34.6560887 | 419275.3277 |
| C_R1Ph_R2Me_XNH_conf9  | -419415.018 | -419250.019 | -419241.058 | 34.2243622 | 419275.2819 |
| C_R1Ph_R2Me_XNH_conf10 | -419414.207 | -419249.376 | -419240.335 | 34.5017214 | 419274.8364 |
| C_R1Ph_R2Me_XNH_conf7  | -419414.207 | -419249.376 | -419240.334 | 34.5010939 | 419274.8351 |
| C_R1Ph_R2Me_XNH_conf11 | -419414.207 | -419249.375 | -419240.334 | 34.4985838 | 419274.8326 |
| C_R1Ph_R2Me_XNH        | -419413.552 | -419248.635 | -419239.666 | 34.3184886 | 419273.9841 |
| D_R1Ph_R2Me_XNH_conf1  | -419436.913 | -419271.256 | -419262.361 | 34.1346284 | 419296.4955 |
| D_R1Ph_R2Me_XNH_conf5  | -419436.913 | -419271.256 | -419262.36  | 34.1340009 | 419296.4942 |
| D_R1Ph_R2Me_XNH_conf2  | -419436.913 | -419271.256 | -419262.361 | 34.1333734 | 419296.4942 |
| D_R1Ph_R2Me_XNH_conf6  | -419435.877 | -419270.295 | -419261.301 | 34.5318418 | 419295.8325 |
| D_R1Ph_R2Me_XNH_conf3  | -419435.877 | -419270.295 | -419261.3   | 34.5312143 | 419295.8312 |
| D_R1Ph_R2Me_XNH        | -419435.711 | -419270.152 | -419261.19  | 34.440853  | 419295.6306 |
| D_R1Ph_R2Me_XNH_conf4  | -419435.711 | -419270.149 | -419261.187 | 34.4414805 | 419295.6288 |
| E_R1Ph_R2Me_XNH        | -419418.227 | -419253.129 | -419244.214 | 34.0015964 | 419278.2154 |
| E_R1Ph_R2Me_XNH_conf1  | -419417.615 | -419252.595 | -419243.553 | 34.57514   | 419278.1281 |
| E_R1Ph_R2Me_XNH_conf2  | -419417.615 | -419252.594 | -419243.552 | 34.5745125 | 419278.1269 |
| E_R1Ph_R2Me_XNH_conf4  | -419418.374 | -419253.144 | -419244.263 | 33.840954  | 419278.1039 |
| E_R1Ph_R2Me_XNH_conf6  | -419418.374 | -419253.142 | -419244.262 | 33.8353064 | -419278.097 |
| E_R1Ph_R2Me_XNH_conf7  | -419415.679 | -419250.99  | -419241.795 | 35.0520471 | 419276.8474 |
| E_R1Ph_R2Me_XNH_conf5  | -419415.679 | -419250.989 | -419241.794 | 35.0501646 | 419276.8443 |
| E_R1Ph_R2Me_XNH_conf3  | -419415.679 | -419250.989 | -419241.794 | 35.0476545 | 419276.8418 |
| TS_A_B_R1Ph_R2Me_XNH   | -419340.134 | -419178.028 | -419168.484 | 35.2948932 | -419203.779 |
| TS_B_C_R1Ph_R2Me_XNH   | -419376.252 | -419212.271 | -419203.713 | 32.6769241 | 419236.3901 |
| TS_B_D_R1Ph_R2Me_XNH   | -419377.596 | -419214.014 | -419205.322 | 33.3910298 | 419238.7131 |
| TS_B_E_R1Ph_R2Me_XNH   | -419381.867 | -419218.037 | -419209.319 | 33.5165316 | 419242.8355 |

A\_R1Ph\_R2Me\_XNH\_conf2  
SCF Energy: -668.294545935  
Num. Imaginary Frequencies: 0

|   |           |           |           |
|---|-----------|-----------|-----------|
| C | 1.031962  | -0.858412 | 0.928160  |
| N | 0.643005  | -0.445984 | 2.098418  |
| N | 0.321023  | -0.076878 | 3.127068  |
| C | 2.029594  | -0.049018 | 0.221148  |
| C | 2.558184  | -0.502355 | -0.999542 |
| C | 2.489162  | 1.179188  | 0.731001  |
| C | 3.512544  | 0.247999  | -1.682582 |
| H | 2.229221  | -1.446999 | -1.419530 |
| C | 3.443820  | 1.921138  | 0.043897  |
| H | 2.098222  | 1.559783  | 1.670589  |
| C | 3.962705  | 1.462997  | -1.168498 |
| H | 3.906181  | -0.124614 | -2.623289 |
| H | 3.782549  | 2.865309  | 0.459176  |
| H | 4.705971  | 2.045063  | -1.703081 |
| C | -2.732477 | -0.758706 | -1.230899 |
| H | -2.303133 | -0.388563 | -2.177220 |
| C | -3.747116 | 0.193569  | -0.762832 |
| C | -4.571267 | 0.990186  | -0.376537 |
| C | 0.391315  | -2.115955 | 0.389639  |
| H | -0.106192 | -2.637886 | 1.211712  |
| H | 1.171230  | -2.785081 | 0.010068  |
| C | -0.634833 | -1.843157 | -0.713133 |
| H | -0.139298 | -1.407883 | -1.597773 |
| H | -1.074058 | -2.797301 | -1.025952 |
| N | -1.706925 | -0.990318 | -0.211505 |
| H | -3.210950 | -1.718780 | -1.456346 |
| C | -5.572853 | 1.950593  | 0.093214  |
| H | -6.571531 | 1.507442  | 0.077009  |
| H | -5.354955 | 2.260712  | 1.118130  |
| H | -5.582993 | 2.842204  | -0.538309 |
| H | -1.314416 | -0.089550 | 0.058736  |

B\_R1Ph\_R2Me\_XNH\_conf1  
SCF Energy: -668.375400772  
Num. Imaginary Frequencies: 0

|   |           |           |           |
|---|-----------|-----------|-----------|
| C | 0.290678  | 0.064805  | 0.639968  |
| N | 0.573172  | -0.989856 | 1.646349  |
| N | 1.555820  | -1.670548 | 1.280678  |
| C | -1.150969 | -0.115304 | 0.176751  |
| C | -2.206776 | 0.209636  | 1.036824  |
| C | -1.447970 | -0.663700 | -1.074537 |
| C | -3.528511 | 0.012734  | 0.644644  |
| H | -2.000563 | 0.604142  | 2.026923  |
| C | -2.772092 | -0.858214 | -1.469912 |
| H | -0.644971 | -0.948591 | -1.747306 |
| C | -3.816375 | -0.516188 | -0.614207 |
| H | -4.334133 | 0.269257  | 1.325357  |
| H | -2.982704 | -1.279257 | -2.447960 |
| H | -4.846579 | -0.665122 | -0.921514 |
| C | 1.555131  | 0.865617  | -1.468471 |
| H | 0.686225  | 0.911328  | -2.136706 |
| C | 1.343615  | -0.162207 | -0.399091 |
| C | 2.085947  | -1.195754 | 0.027511  |
| C | 0.675158  | 2.492652  | 0.115459  |
| H | -0.281967 | 2.551300  | -0.418856 |
| H | 0.872268  | 3.479963  | 0.541371  |

|   |           |           |           |
|---|-----------|-----------|-----------|
| C | 0.568357  | 1.458838  | 1.249950  |
| H | 1.518972  | 1.412743  | 1.794748  |
| H | -0.211640 | 1.738616  | 1.962547  |
| N | 1.720529  | 2.197684  | -0.863314 |
| H | 2.432829  | 0.637410  | -2.077437 |
| C | 3.300149  | -1.859500 | -0.524260 |
| H | 4.121763  | -1.818088 | 0.196562  |
| H | 3.096820  | -2.913812 | -0.734222 |
| H | 3.620903  | -1.378450 | -1.449947 |
| H | 2.628094  | 2.237104  | -0.403331 |

C\_R1Ph\_R2Me\_XNH\_conf4  
SCF Energy: -668.391128638  
Num. Imaginary Frequencies: 0

|   |           |           |           |
|---|-----------|-----------|-----------|
| C | 1.450525  | -0.117372 | -0.892994 |
| N | 2.126606  | 0.861903  | -1.381472 |
| N | 1.733542  | 2.064421  | -0.714155 |
| C | -0.918550 | 0.006965  | 0.040967  |
| C | -1.457502 | 0.064023  | -1.250943 |
| C | -1.773578 | -0.268626 | 1.111991  |
| C | -2.814483 | -0.159406 | -1.469404 |
| H | -0.806825 | 0.287531  | -2.093641 |
| C | -3.133940 | -0.493790 | 0.894518  |
| H | -1.394987 | -0.307127 | 2.128388  |
| C | -3.658356 | -0.442649 | -0.394946 |
| H | -3.211487 | -0.113149 | -2.478500 |
| H | -3.781515 | -0.708743 | 1.738658  |
| H | -4.715699 | -0.620607 | -0.562425 |
| C | 1.197967  | -0.390721 | 1.489331  |
| H | 0.631061  | -0.153466 | 2.392164  |
| C | 0.559318  | 0.310961  | 0.237180  |
| C | 0.862827  | 1.784638  | 0.193330  |
| C | 2.114354  | -2.210903 | 0.178923  |
| H | 2.103185  | -3.298900 | 0.086153  |
| H | 3.146063  | -1.902009 | 0.383179  |
| C | 1.661277  | -1.562665 | -1.160549 |
| H | 2.411125  | -1.710952 | -1.941185 |
| H | 0.718310  | -2.023816 | -1.477990 |
| N | 1.298926  | -1.827331 | 1.325089  |
| H | 2.207487  | 0.015754  | 1.621705  |
| C | 0.239852  | 2.801441  | 1.085485  |
| H | -0.846809 | 2.805197  | 0.952180  |
| H | 0.438692  | 2.561188  | 2.135664  |
| H | 0.635240  | 3.793362  | 0.864315  |
| H | 0.374354  | -2.248582 | 1.267764  |

D\_R1Ph\_R2Me\_XNH\_conf1  
SCF Energy: -668.415355723  
Num. Imaginary Frequencies: 0

|   |           |           |           |
|---|-----------|-----------|-----------|
| C | -0.820001 | -0.385248 | 0.043106  |
| N | 0.236270  | 0.477221  | 0.115037  |
| N | -0.176618 | 1.767670  | 0.173844  |
| C | 1.621872  | 0.182782  | 0.069526  |
| C | 2.482278  | 1.048265  | -0.610521 |
| C | 2.120257  | -0.955856 | 0.704886  |
| C | 3.843885  | 0.763056  | -0.657482 |
| H | 2.074648  | 1.930329  | -1.090881 |
| C | 3.483194  | -1.239757 | 0.635794  |

|                               |           |           |           |   |           |           |           |
|-------------------------------|-----------|-----------|-----------|---|-----------|-----------|-----------|
| H                             | 1.455203  | -1.601578 | 1.267129  | N | -1.561540 | -2.329472 | -0.082384 |
| C                             | 4.349123  | -0.383826 | -0.042801 | C | 1.493414  | -0.370610 | -0.015183 |
| H                             | 4.511454  | 1.436616  | -1.185273 | C | 1.788996  | 0.996466  | -0.093806 |
| H                             | 3.867626  | -2.125907 | 1.130395  | C | 2.553150  | -1.286543 | 0.088167  |
| H                             | 5.410359  | -0.605006 | -0.088151 | C | 3.111285  | 1.439170  | -0.070795 |
| C                             | -3.333748 | -0.202841 | -0.031237 | H | 0.993608  | 1.728952  | -0.175234 |
| H                             | -3.766527 | 0.036596  | -1.018928 | C | 3.869709  | -0.843506 | 0.110973  |
| C                             | -1.959305 | 0.385094  | 0.069442  | H | 2.326126  | -2.345111 | 0.151848  |
| C                             | -1.503481 | 1.723807  | 0.149691  | C | 4.154463  | 0.522329  | 0.031300  |
| C                             | -2.201158 | -2.265770 | -0.650192 | H | 3.321688  | 2.501898  | -0.133768 |
| H                             | -2.289997 | -1.956806 | -1.706267 | H | 4.677815  | -1.563398 | 0.192801  |
| H                             | -2.318522 | -3.350776 | -0.605710 | H | 5.183450  | 0.866990  | 0.049850  |
| C                             | -0.812433 | -1.871726 | -0.130789 | C | -1.373103 | 0.833577  | 1.230654  |
| H                             | -0.628569 | -2.378296 | 0.823261  | H | -0.405766 | 1.243908  | 1.558379  |
| H                             | -0.033264 | -2.185983 | -0.833651 | C | -1.158815 | -0.046090 | -0.032213 |
| N                             | -3.232373 | -1.650157 | 0.188246  | C | -2.146015 | -1.182433 | -0.063758 |
| H                             | -3.999030 | 0.223190  | 0.727311  | C | -1.737587 | 2.285626  | -0.539266 |
| C                             | -2.325019 | 2.971749  | 0.211235  | H | -0.847658 | 2.922946  | -0.411837 |
| H                             | -2.978980 | 2.966693  | 1.088672  | H | -2.475523 | 2.847210  | -1.116207 |
| H                             | -1.675517 | 3.847227  | 0.265876  | C | -1.348249 | 0.959136  | -1.216094 |
| H                             | -2.961846 | 3.063948  | -0.674054 | H | -2.146401 | 0.609949  | -1.874542 |
| H                             | -4.130778 | -2.081767 | -0.003568 | H | -0.442498 | 1.047365  | -1.818991 |
| E_R1Ph_R2Me_XNH               |           |           |           | N | -2.296560 | 1.851443  | 0.741348  |
| SCF Energy: -668.385577586    |           |           |           | H | -1.804408 | 0.267248  | 2.061026  |
| Num. Imaginary Frequencies: 0 |           |           |           | C | -3.627024 | -1.028173 | -0.037829 |
| C                             | 0.105022  | -0.868541 | -0.040768 | H | -3.931027 | -0.475652 | 0.856518  |
| N                             | -0.154937 | -2.132668 | -0.073618 | H | -3.973996 | -0.449295 | -0.899229 |
|                               |           |           |           | H | -4.102725 | -2.009513 | -0.046462 |
|                               |           |           |           | H | -2.392898 | 2.618938  | 1.400136  |

R1Ph\_R2Me\_XNMs:

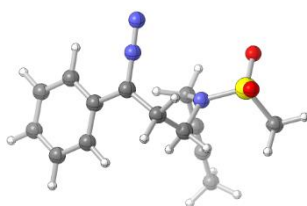

| FILE                    | SCF E      | SCF+ZPVE   | H           | TS         | G           |
|-------------------------|------------|------------|-------------|------------|-------------|
| A_R1Ph_R2Me_XNMs_conf8  | 788212.864 | 788027.164 | -788013.505 | 47.4372    | 788060.9418 |
| A_R1Ph_R2Me_XNMs_conf7  | -788212.8  | 788027.062 | -788013.428 | 46.8937768 | 788060.3214 |
| A_R1Ph_R2Me_XNMs_conf20 | -788212.8  | 788027.054 | -788013.427 | 46.8184757 | 788060.2455 |
| A_R1Ph_R2Me_XNMs_conf14 | -788212.8  | 788027.054 | -788013.427 | 46.8184757 | 788060.2455 |
| A_R1Ph_R2Me_XNMs_conf19 | 788211.638 | 788025.749 | -788012.148 | 46.5580593 | -788058.706 |
| A_R1Ph_R2Me_XNMs_conf1  | 788210.911 | -788025.11 | -788011.481 | 46.9979434 | 788058.4794 |
| A_R1Ph_R2Me_XNMs_conf15 | 788213.195 | -788027.07 | -788013.755 | 44.5092412 | 788058.2645 |
| A_R1Ph_R2Me_XNMs_conf9  | 788210.55  | 788024.664 | -788011.02  | 47.0136311 | 788058.0341 |
| A_R1Ph_R2Me_XNMs_conf2  | 788211.978 | 788025.837 | -788012.475 | 44.9083371 | 788057.3835 |
| A_R1Ph_R2Me_XNMs_conf5  | 788210.163 | 788024.227 | -788010.65  | 46.6063775 | 788057.2562 |
| A_R1Ph_R2Me_XNMs_Me     | 788209.523 | 788023.703 | -788010.041 | 47.0054735 | 788057.0467 |
| A_R1Ph_R2Me_XNMs_conf3  | 788210.354 | 788024.379 | -788010.846 | 45.967573  | 788056.8132 |
| A_R1Ph_R2Me_XNMs_conf12 | 788209.522 | 788023.667 | -788010.028 | 46.7456846 | 788056.7739 |
| A_R1Ph_R2Me_XNMs_conf16 | 788211.002 | -788025.29 | -788012.287 | 44.4678255 | 788056.7546 |
| A_R1Ph_R2Me_XNMs_conf18 | 788209.04  | 788023.294 | -788009.577 | 47.0751271 | -788056.652 |
| A_R1Ph_R2Me_XNMs_conf6  | 788207.754 | 788022.165 | -788008.33  | 48.237902  | 788056.5679 |
| A_R1Ph_R2Me_XNMs_conf10 | 788207.989 | -788022.16 | -788008.457 | 47.5445041 | 788056.0014 |
| A_R1Ph_R2Me_XNMs_conf13 | 788210.509 | 788024.537 | -788011.192 | 44.5123787 | 788055.7041 |
| A_R1Ph_R2Me_XNMs_conf11 | 788208.409 | 788022.523 | -788008.981 | 46.3967894 | 788055.3775 |
| B_R1Ph_R2Me_XNMs_conf3  | 788261.083 | 788072.004 | -788060.27  | 40.7529699 | 788101.0227 |
| B_R1Ph_R2Me_XNMs_conf2  | 788261.083 | 788072.003 | -788060.27  | 40.7492049 | 788101.0189 |
| B_R1Ph_R2Me_XNMs_Me     | 788260.842 | 788071.835 | -788060.008 | 40.9092198 | 788100.9171 |
| B_R1Ph_R2Me_XNMs_conf1  | 788260.842 | 788071.833 | -788060.007 | 40.9098473 | 788100.9165 |
| B_R1Ph_R2Me_XNMs_conf9  | 788259.698 | 788070.747 | -788058.899 | 41.0748823 | 788099.9741 |

|                         |            |            |             |            |             |
|-------------------------|------------|------------|-------------|------------|-------------|
| B_R1Ph_R2Me_XNMs_conf5  | -          | -          | -788058.62  | 40.9663231 | -           |
| B_R1Ph_R2Me_XNMs_conf5  | 788259.473 | 788070.432 | -788058.62  | 40.9663231 | 788099.5864 |
| B_R1Ph_R2Me_XNMs_conf8  | -          | -          | -788056.709 | 41.2694102 | -           |
| B_R1Ph_R2Me_XNMs_conf8  | 788257.49  | 788068.724 | -788056.709 | 41.2694102 | 788097.9788 |
| B_R1Ph_R2Me_XNMs_conf4  | -          | -          | -788056.708 | 41.2625076 | -           |
| B_R1Ph_R2Me_XNMs_conf4  | 788257.49  | 788068.722 | -788056.708 | 41.2625076 | 788097.9705 |
| B_R1Ph_R2Me_XNMs_conf10 | -          | -          | -788055.498 | 41.8555039 | -           |
| B_R1Ph_R2Me_XNMs_conf10 | 788256.197 | 788067.577 | -788055.498 | 41.8555039 | 788097.3532 |
| B_R1Ph_R2Me_XNMs_conf6  | -          | -          | -788055.497 | 41.8529939 | -           |
| B_R1Ph_R2Me_XNMs_conf6  | 788256.197 | 788067.578 | -788055.497 | 41.8529939 | 788097.3503 |
| B_R1Ph_R2Me_XNMs_conf12 | -          | -          | -788055.503 | 41.8435813 | -           |
| B_R1Ph_R2Me_XNMs_conf12 | 788256.197 | 788067.586 | -788055.503 | 41.8435813 | 788097.3464 |
| B_R1Ph_R2Me_XNMs_conf14 | -          | -          | -788055.374 | 41.9659456 | -           |
| B_R1Ph_R2Me_XNMs_conf14 | 788256.091 | 788067.378 | -788055.374 | 41.9659456 | 788097.3401 |
| B_R1Ph_R2Me_XNMs_conf7  | -          | -          | -788055.374 | 41.9596705 | -           |
| B_R1Ph_R2Me_XNMs_conf7  | 788256.091 | 788067.378 | -788055.374 | 41.9596705 | 788097.3338 |
| B_R1Ph_R2Me_XNMs_conf13 | -          | -          | -788056.21  | 41.0071112 | -           |
| B_R1Ph_R2Me_XNMs_conf13 | 788256.922 | 788068.069 | -788056.21  | 41.0071112 | 788097.2173 |
| C_R1Ph_R2Me_XNMs_conf5  | -          | -          | -788069.983 | 40.5258115 | -           |
| C_R1Ph_R2Me_XNMs_conf5  | 788270.893 | 788081.776 | -788069.983 | 40.5258115 | 788110.5084 |
| C_R1Ph_R2Me_XNMs_conf1  | -          | -          | -788069.981 | 40.5220465 | -           |
| C_R1Ph_R2Me_XNMs_conf1  | 788270.894 | 788081.774 | -788069.981 | 40.5220465 | 788110.5034 |
| C_R1Ph_R2Me_XNMs_conf6  | -          | -          | -788068.924 | 40.9399677 | -           |
| C_R1Ph_R2Me_XNMs_conf6  | 788269.795 | 788080.772 | -788068.924 | 40.9399677 | 788109.8642 |
| C_R1Ph_R2Me_XNMs_conf4  | -          | -          | -788068.924 | 40.9393402 | -           |
| C_R1Ph_R2Me_XNMs_conf4  | 788269.795 | 788080.772 | -788068.924 | 40.9393402 | 788109.8629 |
| C_R1Ph_R2Me_XNMs_conf2  | -          | -          | -788070.04  | 39.7169519 | -           |
| C_R1Ph_R2Me_XNMs_conf2  | 788270.971 | 788081.683 | -788070.04  | 39.7169519 | 788109.7574 |
| C_R1Ph_R2Me_XNMs_conf3  | -          | -          | -788068.424 | 40.1882115 | -           |
| C_R1Ph_R2Me_XNMs_conf3  | 788269.243 | 788080.169 | -788068.424 | 40.1882115 | 788108.6121 |
| C_R1Ph_R2Me_XNMs_conf7  | -          | -          | -788067.345 | 40.8765893 | -           |
| C_R1Ph_R2Me_XNMs_conf7  | 788268.197 | 788079.168 | -788067.345 | 40.8765893 | 788108.2219 |
| C_R1Ph_R2Me_XNMs_conf8  | -          | -          | -788066.968 | 40.5672272 | -           |
| C_R1Ph_R2Me_XNMs_conf8  | 788267.804 | 788078.741 | -788066.968 | 40.5672272 | 788107.5348 |
| C_R1Ph_R2Me_XNMs_conf11 | -          | -          | -788064.426 | 40.9688332 | -           |
| C_R1Ph_R2Me_XNMs_conf11 | 788265.205 | 788076.301 | -788064.426 | 40.9688332 | 788105.3945 |
| C_R1Ph_R2Me_XNMs_conf10 | -          | -          | -788064.424 | 40.958793  | -           |
| C_R1Ph_R2Me_XNMs_conf10 | 788265.205 | 788076.298 | -788064.424 | 40.958793  | 788105.3832 |
| C_R1Ph_R2Me_XNMs_conf16 | -          | -          | -788063.671 | 40.8119558 | -           |
| C_R1Ph_R2Me_XNMs_conf16 | 788264.407 | 788075.501 | -788063.671 | 40.8119558 | 788104.4831 |
| C_R1Ph_R2Me_XNMs_Me     | -          | -          | -788063.67  | 40.8056807 | -           |
| C_R1Ph_R2Me_XNMs_Me     | 788264.407 | 788075.498 | -788063.67  | 40.8056807 | 788104.4756 |
| C_R1Ph_R2Me_XNMs_conf12 | -          | -          | -788063.01  | 41.1771663 | -           |
| C_R1Ph_R2Me_XNMs_conf12 | 788263.804 | 788074.927 | -788063.01  | 41.1771663 | 788104.1875 |
| C_R1Ph_R2Me_XNMs_conf15 | -          | -          | -788063.01  | 41.1734012 | -           |
| C_R1Ph_R2Me_XNMs_conf15 | 788263.804 | 788074.926 | -788063.01  | 41.1734012 | 788104.1832 |
| C_R1Ph_R2Me_XNMs_conf13 | -          | -          | -788062.422 | 40.925535  | -           |
| C_R1Ph_R2Me_XNMs_conf13 | 788263.246 | 788074.232 | -788062.422 | 40.925535  | 788103.3474 |
| C_R1Ph_R2Me_XNMs_conf14 | -          | -          | -788061.458 | 41.7030192 | -           |
| C_R1Ph_R2Me_XNMs_conf14 | 788262.373 | 788073.458 | -788061.458 | 41.7030192 | 788103.1609 |
| D_R1Ph_R2Me_XNMs_conf2  | -          | -788098.23 | -788086.322 | 41.224857  | -           |
| D_R1Ph_R2Me_XNMs_conf2  | 788287.795 | -788098.23 | -788086.322 | 41.224857  | -788127.547 |
| D_R1Ph_R2Me_XNMs_conf4  | -          | -          | -788086.366 | 40.7015142 | -           |
| D_R1Ph_R2Me_XNMs_conf4  | 788287.954 | 788098.085 | -788086.366 | 40.7015142 | 788127.0672 |
| D_R1Ph_R2Me_XNMs_conf11 | -          | -          | -788086.366 | 40.6996316 | -           |
| D_R1Ph_R2Me_XNMs_conf11 | 788287.954 | 788098.085 | -788086.366 | 40.6996316 | -788127.066 |
| D_R1Ph_R2Me_XNMs_conf6  | -          | -          | -788086.366 | 40.6990041 | -           |
| D_R1Ph_R2Me_XNMs_conf6  | 788287.954 | 788098.085 | -788086.366 | 40.6990041 | 788127.0653 |
| D_R1Ph_R2Me_XNMs_conf13 | -          | -          | -788085.139 | 41.6019901 | -           |
| D_R1Ph_R2Me_XNMs_conf13 | 788286.626 | 788097.107 | -788085.139 | 41.6019901 | 788126.7415 |
| D_R1Ph_R2Me_XNMs_conf3  | -          | -          | -788085.139 | 41.6013626 | -           |
| D_R1Ph_R2Me_XNMs_conf3  | 788286.626 | 788097.107 | -788085.139 | 41.6013626 | 788126.7408 |

|                          |            |            |             |            |             |
|--------------------------|------------|------------|-------------|------------|-------------|
| D_R1Ph_R2Me_XNMs_conf17  | -          | -          | -788084.974 | 41.356634  | -           |
| D_R1Ph_R2Me_XNMs_conf9   | 788286.495 | 788096.866 | -788085.037 | 41.2286221 | 788126.3304 |
| D_R1Ph_R2Me_XNMs_conf16  | -          | -          | -788085.038 | 41.227367  | -           |
| D_R1Ph_R2Me_XNMs_conf12  | 788286.552 | 788096.932 | -788085.036 | 41.2267395 | 788126.2655 |
| D_R1Ph_R2Me_XNMs_conf1   | -          | -          | -788084.375 | 41.5524169 | -           |
| D_R1Ph_R2Me_XNMs_Me      | 788285.812 | 788096.261 | -788084.374 | 41.5473968 | 788125.9274 |
| D_R1Ph_R2Me_XNMs         | -          | -          | -788084.374 | 41.5467693 | -           |
| D_R1Ph_R2Me_XNMs_conf10  | 788285.812 | 788096.259 | -788084.1   | 41.7187069 | 788125.9212 |
| D_R1Ph_R2Me_XNMs_conf5   | 788285.606 | 788095.968 | -788084.101 | 41.7118043 | -788125.819 |
| D_R1Ph_R2Me_XNMs_conf14  | -          | -          | -788084.001 | 41.6114028 | -           |
| D_R1Ph_R2Me_XNMs_conf7   | 788285.606 | 788095.968 | -788084.001 | 41.6063827 | 788125.8127 |
| D_R1Ph_R2Me_XNMs_conf8   | 788285.456 | 788095.969 | -788084.001 | 41.6063827 | 788125.6071 |
| D_R1Ph_R2Me_XNMs_conf15  | 788285.36  | 788095.866 | -788083.893 | 41.6848214 | -           |
| E_R1Ph_R2Me_XNMs_conf6   | 788285.36  | 788095.861 | -788083.89  | 41.6697612 | 788125.5781 |
| E_R1Ph_R2Me_XNMs_conf3   | 788268.83  | 788079.635 | -788067.8   | 40.7623826 | -           |
| E_R1Ph_R2Me_XNMs_Me      | 788267.288 | 788078.416 | -788066.403 | 41.8410712 | 788108.5621 |
| E_R1Ph_R2Me_XNMs_conf5   | 788267.288 | 788078.413 | -788066.402 | 41.8278935 | 788108.2437 |
| E_R1Ph_R2Me_XNMs_conf1   | 788266.772 | -788078.08 | -788065.938 | 42.2721702 | -           |
| E_R1Ph_R2Me_XNMs_conf4   | 788266.772 | 788078.077 | -788065.936 | 42.2696601 | -788108.21  |
| E_R1Ph_R2Me_XNMs_conf7   | 788266.772 | -788078.07 | -788065.932 | 42.1824363 | -           |
| E_R1Ph_R2Me_XNMs_conf9   | 788266.772 | 788078.307 | -788066.285 | 41.0667246 | 788108.2056 |
| E_R1Ph_R2Me_XNMs_conf10  | 788266.329 | 788077.513 | -788065.485 | 41.8034207 | 788107.1147 |
| E_R1Ph_R2Me_XNMs_conf11  | 788266.329 | 788077.512 | -788065.485 | 41.8015381 | 788107.2884 |
| E_R1Ph_R2Me_XNMs_conf8   | 788266.531 | 788077.721 | -788065.702 | 41.25937   | 788107.2865 |
| E_R1Ph_R2Me_XNMs_conf2   | 788266.898 | 788078.318 | -788066.782 | 40.1681312 | 788106.9609 |
| TS_A_B_R1Ph_R2Me_XNMs_Me | 788265.159 | 788076.396 | -788064.343 | 41.2367797 | -           |
| TS_B_C_R1Ph_R2Me_XNMs_Me | 788190.808 | 788004.487 | -787992.148 | 41.7419247 | 788105.58   |
| TS_B_D_R1Ph_R2Me_XNMs_Me | 788229.577 | 788042.055 | -788030.372 | 40.6626086 | 788033.8896 |
| TS_B_E_R1Ph_R2Me_XNMs_Me | 788224.096 | 788036.678 | -788024.916 | 40.8903945 | 788071.0351 |
| TS_B_E_R1Ph_R2Me_XNMs_Me | 788230.402 | 788042.476 | -788030.949 | 39.8355512 | 788065.8062 |
|                          |            |            |             |            | 788070.7844 |

A\_R1Ph\_R2Me\_XNMs\_conf8  
 SCF Energy: -1256.09731860  
 Num. Imaginary Frequencies: 0

|   |           |           |           |
|---|-----------|-----------|-----------|
| C | 1.431266  | -1.452273 | 0.428824  |
| N | 1.222054  | -2.338046 | -0.500790 |
| N | 1.062904  | -3.115150 | -1.317148 |
| C | 2.550746  | -0.524840 | 0.243644  |
| C | 2.827245  | 0.440507  | 1.227156  |
| C | 3.364399  | -0.558213 | -0.904200 |
| C | 3.882561  | 1.335586  | 1.067213  |
| H | 2.223211  | 0.493224  | 2.127160  |
| C | 4.417496  | 0.337512  | -1.054528 |
| H | 3.175324  | -1.289248 | -1.685504 |
| C | 4.685138  | 1.292015  | -0.071625 |
| H | 4.076259  | 2.070691  | 1.842287  |
| H | 5.031485  | 0.289684  | -1.948570 |
| H | 5.506009  | 1.990798  | -0.193202 |
| C | -0.799301 | 0.622389  | -1.043864 |
| H | 0.286368  | 0.516664  | -1.142410 |
| C | -1.141019 | 2.026101  | -0.753842 |
| C | -1.423772 | 3.174277  | -0.498605 |
| C | 0.407238  | -1.363185 | 1.531130  |
| H | 0.906946  | -1.248957 | 2.499212  |
| H | -0.165222 | -2.293562 | 1.571439  |
| C | -0.571804 | -0.202814 | 1.316558  |
| H | -1.315338 | -0.201850 | 2.119091  |
| H | -0.060041 | 0.764785  | 1.346680  |
| N | -1.223636 | -0.317892 | 0.001982  |
| H | -1.243657 | 0.301665  | -1.988436 |
| C | -1.773162 | 4.564364  | -0.200614 |
| H | -2.700436 | 4.611636  | 0.375750  |
| H | -0.982869 | 5.047719  | 0.378263  |
| H | -1.916774 | 5.128412  | -1.125213 |
| S | -2.782013 | -0.871024 | -0.031930 |
| O | -3.111855 | -1.125487 | -1.432070 |
| O | -2.845781 | -1.959540 | 0.941399  |
| C | -3.844733 | 0.439947  | 0.546917  |
| H | -3.759746 | 1.278222  | -0.144871 |
| H | -4.859606 | 0.039945  | 0.559643  |
| H | -3.531651 | 0.726146  | 1.551636  |

B\_R1Ph\_R2Me\_XNMs\_conf3  
 SCF Energy: -1256.17415963  
 Num. Imaginary Frequencies: 0

|   |           |           |           |
|---|-----------|-----------|-----------|
| C | 0.919432  | 0.403974  | 0.680666  |
| N | 1.222047  | 1.583932  | 1.530856  |
| N | 0.629145  | 2.590313  | 1.089977  |
| C | 2.246123  | -0.137658 | 0.156429  |
| C | 2.654609  | 0.099488  | -1.159464 |
| C | 3.109056  | -0.825461 | 1.017538  |
| C | 3.888444  | -0.366406 | -1.614795 |
| H | 2.016102  | 0.658128  | -1.836934 |
| C | 4.342212  | -1.287567 | 0.564400  |
| H | 2.831421  | -0.989506 | 2.054015  |
| C | 4.733260  | -1.065682 | -0.756409 |
| H | 4.185862  | -0.178819 | -2.641543 |
| H | 4.999572  | -1.817620 | 1.246177  |
| H | 5.692257  | -1.430206 | -1.110263 |
| C | -0.720560 | 0.036848  | -1.283530 |
| H | -0.015859 | -0.470734 | -1.952723 |

|   |           |           |           |
|---|-----------|-----------|-----------|
| C | -0.005920 | 0.963238  | -0.352735 |
| C | -0.165147 | 2.264144  | -0.072009 |
| C | -0.537302 | -1.643658 | 0.536803  |
| H | 0.242504  | -2.200924 | 0.004210  |
| H | -1.142159 | -2.366578 | 1.085539  |
| C | 0.108202  | -0.630733 | 1.492779  |
| H | -0.657240 | -0.095992 | 2.064294  |
| H | 0.742966  | -1.155752 | 2.209526  |
| N | -1.384807 | -1.018564 | -0.489851 |
| H | -1.462253 | 0.544373  | -1.901182 |
| C | -0.991680 | 3.336175  | -0.691579 |
| H | -1.607159 | 2.939048  | -1.501115 |
| H | -1.644245 | 3.795496  | 0.056707  |
| H | -0.350457 | 4.123968  | -1.097641 |
| S | -3.014914 | -0.879598 | -0.217879 |
| O | -3.599360 | -0.415536 | -1.474176 |
| O | -3.447150 | -2.148491 | 0.361801  |
| C | -3.307067 | 0.393648  | 0.999560  |
| H | -4.389104 | 0.520141  | 1.062095  |
| H | -2.906882 | 0.062636  | 1.957624  |
| H | -2.831279 | 1.316263  | 0.663489  |

C\_R1Ph\_R2Me\_XNMs\_conf5  
 SCF Energy: -1256.18979401  
 Num. Imaginary Frequencies: 0

|   |           |           |           |
|---|-----------|-----------|-----------|
| C | 0.781912  | -1.597460 | -1.035241 |
| N | 1.420888  | -2.705448 | -0.944274 |
| N | 2.047917  | -2.767000 | 0.345396  |
| C | 1.538036  | 0.577409  | 0.017628  |
| C | 2.803907  | 0.591940  | -0.581671 |
| C | 0.959588  | 1.783388  | 0.416679  |
| C | 3.483777  | 1.790265  | -0.776364 |
| H | 3.260964  | -0.345303 | -0.894445 |
| C | 1.643942  | 2.985415  | 0.220870  |
| H | -0.028262 | 1.807991  | 0.865178  |
| C | 2.903127  | 2.994222  | -0.373476 |
| H | 4.464437  | 1.784050  | -1.241295 |
| H | 1.182086  | 3.916795  | 0.532891  |
| H | 3.429295  | 3.931317  | -0.524536 |
| C | -0.578780 | -0.714759 | 0.767895  |
| H | -0.640359 | -0.075398 | 1.650475  |
| C | 0.865198  | -0.775519 | 0.224355  |
| C | 1.735508  | -1.719123 | 1.022365  |
| C | -1.547428 | -1.029340 | -1.488196 |
| H | -2.229105 | -0.552984 | -2.192481 |
| H | -1.941251 | -2.019751 | -1.215956 |
| C | -0.151871 | -1.190888 | -2.120031 |
| H | -0.180690 | -1.941795 | -2.911621 |
| H | 0.162210  | -0.229499 | -2.540514 |
| N | -1.439084 | -0.174732 | -0.293502 |
| H | -0.892911 | -1.732420 | 1.044837  |
| C | 2.206847  | -1.453696 | 2.408997  |
| H | 1.354433  | -1.336433 | 3.086434  |
| H | 2.834184  | -2.273556 | 2.759546  |
| H | 2.777398  | -0.519665 | 2.437167  |
| S | -2.812561 | 0.628841  | 0.189969  |
| O | -3.410064 | 1.202729  | -1.010606 |
| C | -3.932859 | -0.596705 | 0.836348  |
| O | -2.410937 | 1.503526  | 1.289277  |
| H | -4.839007 | -0.071327 | 1.140948  |
| H | -4.154174 | -1.314749 | 0.045808  |



H -3.463731 -1.079402 1.694412

D\_R1Ph\_R2Me\_XNMs\_conf2  
SCF Energy: -1256.21672782  
Num. Imaginary Frequencies: 0

|   |           |           |           |
|---|-----------|-----------|-----------|
| C | 0.538687  | 0.127413  | -0.022426 |
| N | 1.808206  | 0.616392  | -0.103598 |
| N | 1.818046  | 1.969380  | -0.176239 |
| C | 3.033135  | -0.098578 | -0.063620 |
| C | 3.148981  | -1.328025 | -0.713220 |
| C | 4.118440  | 0.447762  | 0.624474  |
| C | 4.354472  | -2.025061 | -0.649859 |
| H | 2.316479  | -1.725553 | -1.283158 |
| C | 5.322163  | -0.249912 | 0.665661  |
| H | 4.006506  | 1.407827  | 1.115238  |
| C | 5.443151  | -1.490208 | 0.036824  |
| H | 4.443454  | -2.981099 | -1.155351 |
| H | 6.166323  | 0.174572  | 1.199417  |
| H | 6.381848  | -2.032722 | 0.077314  |
| C | -1.792406 | 1.111380  | 0.036601  |
| H | -2.283627 | 1.655677  | -0.772520 |
| C | -0.302522 | 1.214229  | -0.056765 |
| C | 0.545544  | 2.344856  | -0.152363 |
| C | -1.334879 | -1.230121 | 0.735413  |
| H | -1.790437 | -2.220317 | 0.705343  |
| H | -1.305801 | -0.878045 | 1.776946  |
| C | 0.086039  | -1.285108 | 0.165427  |
| H | 0.740964  | -1.827000 | 0.855342  |
| H | 0.070622  | -1.829454 | -0.784471 |
| N | -2.149974 | -0.316263 | -0.087272 |
| H | -2.146431 | 1.526965  | 0.994389  |
| C | 0.152912  | 3.785133  | -0.229800 |
| H | -0.425189 | 4.080441  | 0.651142  |
| H | 1.043432  | 4.413106  | -0.289147 |
| H | -0.467331 | 3.973814  | -1.111265 |
| S | -3.772883 | -0.649263 | -0.182348 |
| C | -4.465448 | -0.389144 | 1.441342  |
| O | -4.349582 | 0.343837  | -1.084598 |
| O | -3.898648 | -2.070438 | -0.494855 |
| H | -5.529044 | -0.620904 | 1.371634  |
| H | -3.972815 | -1.064436 | 2.141870  |
| H | -4.320535 | 0.653891  | 1.724089  |

E\_R1Ph\_R2Me\_XNMs\_conf6  
SCF Energy: -1256.18650547  
Num. Imaginary Frequencies: 0

|   |           |           |           |
|---|-----------|-----------|-----------|
| C | 1.679666  | 1.089540  | -0.153395 |
| N | 2.196250  | 2.219518  | -0.498196 |
| N | 1.191124  | 3.226658  | -0.482028 |
| C | 2.471359  | -0.149665 | -0.071279 |
| C | 3.860544  | -0.096547 | -0.266772 |
| C | 1.865259  | -1.385873 | 0.193777  |
| C | 4.624300  | -1.254971 | -0.197659 |
| H | 4.326359  | 0.861699  | -0.470465 |
| C | 2.636322  | -2.545785 | 0.261153  |
| H | 0.792172  | -1.459199 | 0.348472  |
| C | 4.014178  | -2.484199 | 0.066447  |
| H | 5.697684  | -1.201843 | -0.348680 |
| H | 2.155276  | -3.496806 | 0.465010  |
| H | 4.612433  | -3.388166 | 0.120295  |
| C | -0.736875 | 0.347511  | -0.714767 |
| H | -0.195974 | -0.317422 | -1.389354 |
| C | 0.207223  | 1.226910  | 0.153187  |
| C | 0.070977  | 2.701388  | -0.134340 |
| C | -1.575358 | 0.315242  | 1.536509  |
| H | -1.822324 | -0.354012 | 2.360376  |
| H | -2.329610 | 1.113916  | 1.478866  |
| C | -0.166153 | 0.893833  | 1.631195  |
| H | -0.112965 | 1.774071  | 2.274779  |
| H | 0.519429  | 0.139970  | 2.023898  |
| N | -1.486567 | -0.441466 | 0.278245  |
| H | -1.396267 | 0.983624  | -1.318357 |
| C | -1.188759 | 3.484792  | 0.009241  |
| H | -1.529695 | 3.475016  | 1.050384  |
| H | -1.020181 | 4.518039  | -0.295279 |
| H | -1.991418 | 3.059454  | -0.602275 |
| S | -2.803132 | -1.298149 | -0.243945 |
| O | -2.389743 | -1.968097 | -1.473308 |
| O | -3.269591 | -2.080048 | 0.896644  |
| C | -4.078249 | -0.119312 | -0.655681 |
| H | -3.718964 | 0.532201  | -1.452758 |
| H | -4.934740 | -0.700367 | -1.000329 |
| H | -4.338695 | 0.445230  | 0.239991  |

R1Ph\_R2Ph\_XNMs:

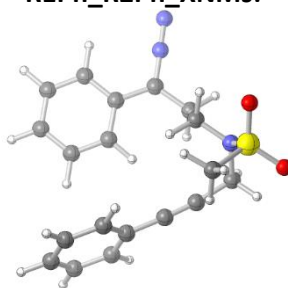

| FILE                    | SCF E       | SCF+ZPVE    | H           | TS         | G            |
|-------------------------|-------------|-------------|-------------|------------|--------------|
| A_R1Ph_R2Ph_XNMs_conf18 | -908490.756 | -908270.765 | -908255.605 | 49.7683974 | -908305.3733 |
| A_R1Ph_R2Ph_XNMs_conf7  | -908490.562 | -908270.712 | -908255.551 | 49.5914397 | -908305.1427 |
| A_R1Ph_R2Ph_XNMs_conf14 | -908489.025 | -908269.086 | -908253.85  | 51.2555946 | -908305.106  |
| A_R1Ph_R2Ph_XNMs_conf10 | -908489.314 | -908269.62  | -908254.291 | 50.4548926 | -908304.7459 |
| A_R1Ph_R2Ph_XNMs_conf13 | -908489.314 | -908269.62  | -908254.291 | 50.4542651 | -908304.7453 |
| A_R1Ph_R2Ph_XNMs_conf5  | -908488.673 | -908268.915 | -908253.585 | 51.1376229 | -908304.7228 |
| A_R1Ph_R2Ph_XNMs_conf8  | -908488.008 | -908268.306 | -908252.915 | 51.7067739 | -908304.6214 |
| A_R1Ph_R2Ph_XNMs_conf6  | -908488.008 | -908268.306 | -908252.914 | 51.7048913 | -908304.6189 |
| A_R1Ph_R2Ph_XNMs_conf1  | -908489.553 | -908269.833 | -908254.627 | 49.8035379 | -908304.4301 |
| A_R1Ph_R2Ph_XNMs_conf17 | -908488.243 | -908268.432 | -908253.227 | 50.8734414 | -908304.1002 |
| A_R1Ph_R2Ph_XNMs_conf2  | -908487.813 | -908268.193 | -908252.857 | 51.1890786 | -908304.0466 |
| A_R1Ph_R2Ph_XNMs_conf15 | -908488.733 | -908268.74  | -908253.491 | 50.547764  | -908304.0391 |
| A_R1Ph_R2Ph_XNMs_conf11 | -908487.502 | -908267.719 | -908252.388 | 51.6295902 | -908304.0173 |
| A_R1Ph_R2Ph_XNMs_conf16 | -908486.736 | -908266.925 | -908251.598 | 51.3101879 | -908302.9084 |
| A_R1Ph_R2Ph_XNMs        | -908486.736 | -908266.926 | -908251.599 | 51.3070504 | -908302.9059 |
| A_R1Ph_R2Ph_XNMs_conf4  | -908488.369 | -908268.578 | -908253.857 | 48.5541667 | -908302.4111 |
| A_R1Ph_R2Ph_XNMs_conf3  | -908488.369 | -908268.577 | -908253.857 | 48.5529117 | -908302.4099 |
| A_R1Ph_R2Ph_XNMs_conf12 | -908486.975 | -908267.114 | -908251.896 | 49.8342859 | -908301.7301 |
| A_R1Ph_R2Ph_XNMs_conf9  | -908489.314 | -908269.62  | -908254.291 | 50.4530101 | -908304.744  |
| B_R1Ph_R2Ph_XNMs        | -908537.214 | -908314.463 | -908300.769 | 45.670761  | -908346.4402 |
| B_R1Ph_R2Ph_XNMs_conf1  | -908537.214 | -908314.463 | -908300.769 | 45.669506  | -908346.4389 |
| B_R1Ph_R2Ph_XNMs_conf3  | -908537.214 | -908314.462 | -908300.768 | 45.6663685 | -908346.4345 |
| B_R1Ph_R2Ph_XNMs_conf2  | -908536.911 | -908314.112 | -908300.424 | 45.9211373 | -908346.3451 |
| B_R1Ph_R2Ph_XNMs_conf5  | -908536.712 | -908313.901 | -908300.278 | 45.7630049 | -908346.0406 |
| B_R1Ph_R2Ph_XNMs_conf4  | -908536.179 | -908313.244 | -908299.656 | 45.398422  | -908345.0545 |
| B_R1Ph_R2Ph_XNMs_conf6  | -908535.035 | -908312.566 | -908298.688 | 46.0974674 | -908344.7852 |
| B_R1Ph_R2Ph_XNMs_conf8  | -908535.045 | -908312.509 | -908298.661 | 45.9612979 | -908344.6227 |
| B_R1Ph_R2Ph_XNMs_conf9  | -908534.182 | -908311.463 | -908297.756 | 45.5452592 | -908343.3014 |
| B_R1Ph_R2Ph_XNMs_conf7  | -908530.245 | -908307.575 | -908293.832 | 45.7805752 | -908339.6127 |
| C_R1Ph_R2Ph_XNMs_conf1  | -908547.809 | -908324.858 | -908311.167 | 45.4580354 | -908356.6252 |
| C_R1Ph_R2Ph_XNMs_conf3  | -908546.439 | -908323.548 | -908309.842 | 45.5973424 | -908355.4393 |
| C_R1Ph_R2Ph_XNMs_conf4  | -908546.439 | -908323.547 | -908309.841 | 45.5948324 | -908355.4362 |
| C_R1Ph_R2Ph_XNMs_conf5  | -908545.912 | -908323.046 | -908309.417 | 45.0106212 | -908354.4276 |
| C_R1Ph_R2Ph_XNMs_conf7  | -908541.843 | -908319.119 | -908305.332 | 45.8621514 | -908351.1941 |
| C_R1Ph_R2Ph_XNMs_conf13 | -908541.843 | -908319.118 | -908305.331 | 45.8596414 | -908351.191  |

|                                      |             |             |             |            |              |
|--------------------------------------|-------------|-------------|-------------|------------|--------------|
| C_R1Ph_R2Ph_XNMs                     | -908541.843 | -908319.115 | -908305.331 | 45.8414436 | -908351.1721 |
| C_R1Ph_R2Ph_XNMs_conf6               | -908541.198 | -908318.468 | -908304.612 | 46.1821812 | -908350.7938 |
| C_R1Ph_R2Ph_XNMs_conf9               | -908541.198 | -908318.466 | -908304.61  | 46.1784161 | -908350.788  |
| C_R1Ph_R2Ph_XNMs_conf12              | -908541.064 | -908318.149 | -908304.388 | 45.5734971 | -908349.962  |
| C_R1Ph_R2Ph_XNMs_conf2               | -908541.064 | -908318.149 | -908304.388 | 45.5734971 | -908349.962  |
| C_R1Ph_R2Ph_XNMs_conf10              | -908541.064 | -908318.149 | -908304.388 | 45.570987  | -908349.959  |
| C_R1Ph_R2Ph_XNMs_conf8               | -908541.065 | -908318.148 | -908304.387 | 45.569732  | -908349.9572 |
| C_R1Ph_R2Ph_XNMs_conf11              | -908540.108 | -908317.323 | -908303.562 | 46.0566793 | -908349.6185 |
| D_R1Ph_R2Ph_XNMs_conf2               | -908564.412 | -908341.167 | -908327.296 | 46.7626274 | -908374.0582 |
| D_R1Ph_R2Ph_XNMs_conf3               | -908565.246 | -908341.764 | -908328.108 | 45.9424726 | -908374.0508 |
| D_R1Ph_R2Ph_XNMs_conf8               | -908564.994 | -908341.575 | -908327.808 | 46.2405396 | -908374.0483 |
| D_R1Ph_R2Ph_XNMs_conf4               | -908564.994 | -908341.574 | -908327.808 | 46.233637  | -908374.0414 |
| D_R1Ph_R2Ph_XNMs_conf7               | -908564.334 | -908340.794 | -908327.136 | 45.8590139 | -908372.9947 |
| D_R1Ph_R2Ph_XNMs_conf9               | -908563.876 | -908340.45  | -908326.7   | 46.0943299 | -908372.7946 |
| D_R1Ph_R2Ph_XNMs_conf10              | -908563.847 | -908340.42  | -908326.658 | 46.1188027 | -908372.7765 |
| D_R1Ph_R2Ph_XNMs_conf5               | -908562.921 | -908339.671 | -908325.781 | 46.9056995 | -908372.6867 |
| D_R1Ph_R2Ph_XNMs                     | -908563.486 | -908340.061 | -908326.35  | 46.168376  | -908372.5181 |
| D_R1Ph_R2Ph_XNMs_conf11              | -908563.486 | -908340.061 | -908326.35  | 46.1664935 | -908372.5163 |
| D_R1Ph_R2Ph_XNMs_conf12              | -908563.101 | -908339.741 | -908325.958 | 46.205399  | -908372.1637 |
| D_R1Ph_R2Ph_XNMs_conf1               | -908562.253 | -908338.959 | -908325.163 | 46.8636564 | -908372.0271 |
| D_R1Ph_R2Ph_XNMs_conf13              | -908562.253 | -908338.958 | -908325.163 | 46.8598913 | -908372.0233 |
| D_R1Ph_R2Ph_XNMs_conf6               | -908563.058 | -908339.676 | -908325.903 | 46.0748771 | -908371.978  |
| D_R1Ph_R2Ph_XNMs_conf14              | -908562.246 | -908338.843 | -908325.088 | 46.8736965 | -908371.9621 |
| E_R1Ph_R2Ph_XNMs                     | -908543.118 | -908320.022 | -908306.235 | 45.9857708 | -908352.2204 |
| E_R1Ph_R2Ph_XNMs_conf4               | -908543.399 | -908320.242 | -908306.486 | 45.7272369 | -908352.2133 |
| E_R1Ph_R2Ph_XNMs_conf2               | -908543.171 | -908320.252 | -908306.471 | 45.5408666 | -908352.0123 |
| E_R1Ph_R2Ph_XNMs_conf1               | -908538.753 | -908316.294 | -908302.297 | 46.3622764 | -908348.6588 |
| E_R1Ph_R2Ph_XNMs_conf3               | -908538.766 | -908316.277 | -908302.329 | 46.0911923 | -908348.4203 |
| TS_A_B_R1Ph_R2Ph_XNMs                | -908469.047 | -908249.16  | -908234.883 | 47.2075315 | -908282.0907 |
| TS_B_C_R1Ph_R2Ph_XNMs                | -908508.58  | -908286.993 | -908273.555 | 44.6422731 | -908318.1971 |
| TS_B_D_R1Ph_R2Ph_XNMs                | -908503.848 | -908282.507 | -908268.979 | 45.1373781 | -908314.1163 |
| TS_B_E_R1Ph_R2Ph_XNMs-<br>isom-nocar | -908507.791 | -908286.328 | -908272.75  | 45.3199833 | -908318.0703 |
| TS_B_E_R1Ph_R2Ph_XNMs                | -908505.661 | -908284.347 | -908270.762 | 45.2365245 | -908315.9985 |

A\_R1Ph\_R2Ph\_XNMs\_conf18  
SCF Energy: -1447.77236473  
Num. Imaginary Frequencies: 0

|   |           |           |           |
|---|-----------|-----------|-----------|
| C | 0.257281  | -2.735062 | 0.530588  |
| N | 0.745495  | -3.927553 | 0.357717  |
| N | 1.151068  | -4.981152 | 0.208781  |
| C | -1.127773 | -2.495440 | 0.109988  |
| C | -1.909249 | -3.502732 | -0.484170 |
| C | -1.705538 | -1.228663 | 0.299959  |
| C | -3.220168 | -3.246465 | -0.871922 |
| H | -1.492950 | -4.493051 | -0.646587 |
| C | -3.018725 | -0.979008 | -0.093077 |
| H | -1.131180 | -0.428609 | 0.756073  |
| C | -3.785231 | -1.983936 | -0.681335 |
| H | -3.803299 | -4.040427 | -1.328236 |
| H | -3.438258 | 0.012240  | 0.061626  |
| H | -4.807255 | -1.787722 | -0.988148 |
| C | 2.081127  | 1.121737  | 1.622236  |
| H | 1.996479  | 0.533304  | 2.540231  |
| C | 0.764359  | 1.670937  | 1.263070  |
| C | -0.339762 | 2.008049  | 0.896762  |
| C | 1.178690  | -1.690226 | 1.109477  |
| H | 2.014805  | -2.171542 | 1.624717  |
| H | 0.620808  | -1.119679 | 1.860317  |
| C | 1.720623  | -0.765774 | 0.013614  |
| H | 2.289712  | -1.357322 | -0.704990 |
| H | 0.880664  | -0.287860 | -0.511682 |
| N | 2.636765  | 0.245620  | 0.573233  |
| H | 2.805357  | 1.913842  | 1.823230  |
| C | -1.659212 | 2.341373  | 0.437264  |
| S | 3.624011  | 1.000788  | -0.546099 |
| O | 4.494687  | 1.901294  | 0.204796  |
| O | 4.211768  | -0.058500 | -1.360565 |
| C | 2.578508  | 1.991163  | -1.599123 |
| H | 1.862347  | 1.335014  | -2.095363 |
| H | 2.072171  | 2.736891  | -0.985050 |
| H | 3.233351  | 2.466848  | -2.330556 |
| C | -1.916005 | 2.414110  | -0.940443 |
| C | -3.203611 | 2.683186  | -1.394544 |
| C | -4.241387 | 2.881758  | -0.482417 |
| C | -3.988489 | 2.813650  | 0.888632  |
| C | -2.703393 | 2.544143  | 1.351770  |
| H | -1.104889 | 2.248268  | -1.643064 |
| H | -3.398268 | 2.733101  | -2.460854 |
| H | -5.245227 | 3.088177  | -0.839327 |
| H | -4.794202 | 2.966708  | 1.599155  |
| H | -2.501571 | 2.481654  | 2.416161  |

B\_R1Ph\_R2Ph\_XNMs\_conf1  
SCF Energy: -1447.84639997  
Num. Imaginary Frequencies: 0

|   |           |           |           |
|---|-----------|-----------|-----------|
| C | -0.900570 | -1.026334 | 0.929927  |
| N | -0.277476 | -2.131944 | 1.697370  |
| N | 0.936908  | -2.213239 | 1.424289  |
| C | -2.013231 | -1.632210 | 0.076452  |
| C | -3.203596 | -2.052457 | 0.680644  |
| C | -1.842566 | -1.838990 | -1.295709 |
| C | -4.211752 | -2.643272 | -0.077039 |
| H | -3.343907 | -1.937266 | 1.750763  |
| C | -2.853624 | -2.428517 | -2.055311 |

|   |           |           |           |
|---|-----------|-----------|-----------|
| H | -0.914752 | -1.550652 | -1.780570 |
| C | -4.042918 | -2.826939 | -1.449902 |
| H | -5.128017 | -2.964895 | 0.407622  |
| H | -2.705930 | -2.576800 | -3.120257 |
| H | -4.830455 | -3.283955 | -2.040340 |
| C | 0.106656  | 0.848688  | -0.549733 |
| H | -0.539677 | 0.731265  | -1.434831 |
| C | 0.250453  | -0.453522 | 0.166772  |
| C | 1.327422  | -1.195071 | 0.475421  |
| C | -1.713174 | 1.333204  | 1.088075  |
| H | -2.508635 | 1.120719  | 0.356555  |
| H | -2.051418 | 2.124987  | 1.757411  |
| C | -1.396119 | 0.073486  | 1.892452  |
| H | -0.606453 | 0.292676  | 2.617734  |
| H | -2.283656 | -0.251775 | 2.438049  |
| N | -0.489871 | 1.802117  | 0.414098  |
| H | 1.074154  | 1.240914  | -0.862879 |
| C | 2.730309  | -1.109278 | 0.055077  |
| S | -0.465714 | 3.400295  | -0.046183 |
| O | -0.897659 | 4.178053  | 1.110989  |
| O | 0.848329  | 3.642710  | -0.634624 |
| C | -1.692046 | 3.600312  | -1.326004 |
| H | -1.667560 | 4.649676  | -1.622799 |
| H | -1.430017 | 2.959761  | -2.168681 |
| H | -2.669259 | 3.342176  | -0.916831 |
| C | 3.062586  | -0.688776 | -1.239543 |
| C | 4.397163  | -0.587091 | -1.624399 |
| C | 5.411004  | -0.915615 | -0.724384 |
| C | 5.085718  | -1.352947 | 0.560378  |
| C | 3.752799  | -1.452872 | 0.949681  |
| H | 2.274301  | -0.469024 | -1.954324 |
| H | 4.644452  | -0.262647 | -2.629994 |
| H | 6.450826  | -0.839331 | -1.025772 |
| H | 5.871877  | -1.615457 | 1.260950  |
| H | 3.496183  | -1.790533 | 1.948773  |

B\_R1Ph\_R2Ph\_XNMs\_conf2  
SCF Energy: -1447.84591748  
Num. Imaginary Frequencies: 0

|   |           |           |           |
|---|-----------|-----------|-----------|
| C | 1.082151  | -0.917947 | -0.894580 |
| N | 0.616246  | -2.105626 | -1.650692 |
| N | -0.574514 | -2.352551 | -1.370977 |
| C | 2.311393  | -1.325987 | -0.089916 |
| C | 3.554081  | -1.463832 | -0.717727 |
| C | 2.203239  | -1.639985 | 1.268767  |
| C | 4.669467  | -1.882763 | 0.004268  |
| H | 3.658599  | -1.261185 | -1.778693 |
| C | 3.320024  | -2.057494 | 1.992381  |
| H | 1.241884  | -1.567972 | 1.769201  |
| C | 4.557702  | -2.174498 | 1.363731  |
| H | 5.625734  | -1.984994 | -0.498712 |
| H | 3.218230  | -2.292190 | 3.047097  |
| H | 5.428041  | -2.497004 | 1.926067  |
| C | -0.101543 | 0.748176  | 0.667363  |
| H | 0.688748  | 0.718475  | 1.434069  |
| C | -0.121648 | -0.531631 | -0.098843 |
| C | -1.103803 | -1.380661 | -0.439322 |
| C | 1.439508  | 1.569463  | -1.085168 |
| H | 2.302153  | 1.526696  | -0.401948 |
| H | 1.575436  | 2.402169  | -1.775925 |
| C | 1.330238  | 0.259989  | -1.870073 |

|   |           |           |           |
|---|-----------|-----------|-----------|
| H | 0.485446  | 0.321838  | -2.562913 |
| H | 2.239019  | 0.102526  | -2.453582 |
| N | 0.192197  | 1.797315  | -0.333745 |
| H | -1.056270 | 0.962013  | 1.146284  |
| C | -2.528736 | -1.436952 | -0.084778 |
| S | -0.160598 | 3.358500  | 0.113174  |
| O | 0.071633  | 4.193560  | -1.061068 |
| O | -1.486012 | 3.317633  | 0.725181  |
| C | 1.015058  | 3.832771  | 1.367255  |
| H | 0.774962  | 4.857716  | 1.653299  |
| H | 0.907467  | 3.163733  | 2.221722  |
| H | 2.017767  | 3.780448  | 0.941530  |
| C | -3.151531 | -2.677298 | 0.104319  |
| C | -4.499230 | -2.738578 | 0.449190  |
| C | -5.238074 | -1.564300 | 0.600166  |
| C | -4.626831 | -0.327081 | 0.395825  |
| C | -3.278968 | -0.261069 | 0.050092  |
| H | -2.573619 | -3.588509 | -0.016349 |
| H | -4.973445 | -3.703223 | 0.599030  |
| H | -6.289021 | -1.613811 | 0.866682  |
| H | -5.201483 | 0.588301  | 0.493746  |
| H | -2.817528 | 0.703506  | -0.144099 |

B\_R1Ph\_R2Ph\_XNMs\_conf3  
 SCF Energy: -1447.84639984  
 Num. Imaginary Frequencies: 0

|   |           |           |           |
|---|-----------|-----------|-----------|
| C | 0.900127  | 1.026437  | 0.929940  |
| N | 0.276672  | 2.131801  | 1.697425  |
| N | -0.937729 | 2.212656  | 1.424378  |
| C | 2.012438  | 1.632831  | 0.076388  |
| C | 1.841660  | 1.839506  | -1.295773 |
| C | 3.202488  | 2.053904  | 0.680618  |
| C | 2.852363  | 2.429703  | -2.055338 |
| H | 0.914034  | 1.550608  | -1.780665 |
| C | 4.210278  | 2.645375  | -0.077022 |
| H | 3.342803  | 1.938865  | 1.750753  |
| C | 4.041369  | 2.828906  | -1.449899 |
| H | 2.704607  | 2.577891  | -3.120290 |
| H | 5.126303  | 2.967628  | 0.407673  |
| H | 4.828627  | 3.286433  | -2.040315 |
| C | -0.106259 | -0.848946 | -0.549775 |
| H | 0.540088  | -0.731104 | -1.434820 |
| C | -0.250678 | 0.453160  | 0.166860  |
| C | -1.327903 | 1.194312  | 0.475527  |
| C | 1.713939  | -1.332611 | 1.087730  |
| H | 2.509112  | -1.119515 | 0.356065  |
| H | 2.052800  | -2.124290 | 1.756874  |
| C | 1.396296  | -0.073200 | 1.892347  |
| H | 0.606786  | -0.292912 | 2.617640  |
| H | 2.283688  | 0.252457  | 2.437941  |
| N | 0.490777  | -1.802125 | 0.413982  |
| H | -1.073523 | -1.241667 | -0.863002 |
| C | -2.730781 | 1.108288  | 0.055169  |
| S | 0.467266  | -3.400318 | -0.046173 |
| O | 0.899555  | -4.177824 | 1.111041  |
| O | -0.846674 | -3.643298 | -0.634573 |
| C | 1.693691  | -3.599941 | -1.325951 |
| H | 1.669533  | -4.649312 | -1.622747 |
| H | 1.431455  | -2.959464 | -2.168625 |
| H | 2.670812  | -3.341505 | -0.916751 |
| C | -3.062971 | 0.687436  | -1.239356 |

|   |           |          |           |
|---|-----------|----------|-----------|
| C | -4.397523 | 0.585518 | -1.624232 |
| C | -5.411425 | 0.914190 | -0.724346 |
| C | -5.086220 | 1.351898 | 0.560306  |
| C | -3.753329 | 1.452049 | 0.949637  |
| H | -2.274639 | 0.467604 | -1.954067 |
| H | -4.644740 | 0.260805 | -2.629758 |
| H | -6.451230 | 0.837747 | -1.025753 |
| H | -5.872428 | 1.614555 | 1.260770  |
| H | -3.496777 | 1.790027 | 1.948637  |

B\_R1Ph\_R2Ph\_XNMs\_conf4  
 SCF Energy: -1447.84475080  
 Num. Imaginary Frequencies: 0

|   |           |           |           |
|---|-----------|-----------|-----------|
| C | 1.343288  | 0.221677  | 0.812556  |
| N | 1.086665  | 1.207643  | 1.888516  |
| N | -0.017250 | 1.758838  | 1.707370  |
| C | 2.603545  | 0.695600  | 0.084290  |
| C | 3.862820  | 0.493733  | 0.660484  |
| C | 2.519556  | 1.398951  | -1.121552 |
| C | 5.013750  | 0.961510  | 0.030612  |
| H | 3.953960  | -0.015929 | 1.614095  |
| C | 3.672282  | 1.865621  | -1.753644 |
| H | 1.551563  | 1.596162  | -1.572405 |
| C | 4.923248  | 1.643461  | -1.182966 |
| H | 5.981826  | 0.796287  | 0.492646  |
| H | 3.587350  | 2.404387  | -2.691973 |
| H | 5.820740  | 2.004029  | -1.675114 |
| C | -0.084808 | -0.727214 | -1.104728 |
| H | 0.644500  | -0.549552 | -1.904015 |
| C | 0.090153  | 0.274523  | -0.005707 |
| C | -0.696814 | 1.210314  | 0.552198  |
| C | 1.431605  | -2.193029 | 0.198340  |
| H | 2.255494  | -1.988751 | -0.494664 |
| H | 1.530059  | -3.219310 | 0.548954  |
| C | 1.466457  | -1.209125 | 1.373434  |
| H | 0.623930  | -1.401025 | 2.047548  |
| H | 2.387686  | -1.335474 | 1.945658  |
| N | 0.191035  | -2.090641 | -0.591506 |
| H | -1.079856 | -0.684639 | -1.549155 |
| C | -2.018166 | 1.759866  | 0.208401  |
| S | -1.137283 | -2.926361 | -0.007474 |
| O | -0.624124 | -4.025151 | 0.807963  |
| O | -2.112622 | -2.008257 | 0.585212  |
| C | -1.852928 | -3.596756 | -1.490398 |
| H | -2.747344 | -4.140322 | -1.183294 |
| H | -2.118240 | -2.777309 | -2.158809 |
| H | -1.121725 | -4.261382 | -1.947833 |
| C | -2.245728 | 3.131621  | 0.388132  |
| C | -3.472466 | 3.692317  | 0.042631  |
| C | -4.487582 | 2.889086  | -0.478315 |
| C | -4.272188 | 1.520823  | -0.642224 |
| C | -3.046430 | 0.954363  | -0.297415 |
| H | -1.454818 | 3.754371  | 0.794596  |
| H | -3.636026 | 4.756327  | 0.181040  |
| H | -5.444672 | 3.325833  | -0.745443 |
| H | -5.065770 | 0.887850  | -1.026806 |
| H | -2.898880 | -0.117451 | -0.376282 |

B\_R1Ph\_R2Ph\_XNMs\_conf5  
 SCF Energy: -1447.84560015

Num. Imaginary Frequencies: 0

|   |           |           |           |
|---|-----------|-----------|-----------|
| C | 1.403101  | 0.167275  | 0.846603  |
| N | 1.112459  | 1.098187  | 1.965742  |
| N | 0.011890  | 1.658104  | 1.783919  |
| C | 2.707337  | 0.608121  | 0.178796  |
| C | 3.908683  | -0.085644 | 0.336040  |
| C | 2.701213  | 1.780839  | -0.587255 |
| C | 5.078819  | 0.378251  | -0.268248 |
| H | 3.953856  | -0.993979 | 0.926720  |
| C | 3.867852  | 2.247353  | -1.185423 |
| H | 1.774321  | 2.335085  | -0.713183 |
| C | 5.063003  | 1.543513  | -1.029882 |
| H | 6.002587  | -0.176407 | -0.138102 |
| H | 3.843403  | 3.159334  | -1.773334 |
| H | 5.973638  | 1.902462  | -1.498573 |
| C | 0.006298  | -0.645723 | -1.161585 |
| H | 0.786456  | -0.524219 | -1.922239 |
| C | 0.201377  | 0.315784  | -0.034560 |
| C | -0.602714 | 1.216231  | 0.553315  |
| C | 1.313111  | -2.255519 | 0.193052  |
| H | 2.176137  | -2.139465 | -0.470992 |
| H | 1.294013  | -3.285319 | 0.547560  |
| C | 1.396721  | -1.280763 | 1.375776  |
| H | 0.514754  | -1.409523 | 2.013401  |
| H | 2.274709  | -1.483601 | 1.992879  |
| N | 0.121346  | -2.030015 | -0.643098 |
| H | -0.963515 | -0.514518 | -1.644222 |
| C | -1.923917 | 1.732138  | 0.181885  |
| S | -1.321237 | -2.689405 | -0.090144 |
| O | -0.968952 | -3.790406 | 0.805319  |
| O | -2.218724 | -1.640769 | 0.395124  |
| C | -2.024783 | -3.362599 | -1.577595 |
| H | -2.987244 | -3.793207 | -1.298282 |
| H | -2.164189 | -2.555394 | -2.297071 |
| H | -1.345139 | -4.122622 | -1.959748 |
| C | -2.263226 | 1.924014  | -1.163613 |
| C | -3.532258 | 2.381345  | -1.510884 |
| C | -4.469904 | 2.662754  | -0.517140 |
| C | -4.131197 | 2.491404  | 0.825894  |
| C | -2.864776 | 2.030894  | 1.176070  |
| H | -1.522275 | 1.742598  | -1.937409 |
| H | -3.784155 | 2.529774  | -2.556101 |
| H | -5.457622 | 3.022264  | -0.787588 |
| H | -4.856113 | 2.714490  | 1.602200  |
| H | -2.600736 | 1.890187  | 2.219432  |

B\_R1Ph\_R2Ph\_XNMs\_conf6

SCF Energy: -1447.84292852

Num. Imaginary Frequencies: 0

|   |           |           |           |
|---|-----------|-----------|-----------|
| C | -0.190917 | -1.192952 | 0.917043  |
| N | 0.694222  | -2.346482 | 1.196318  |
| N | 1.863113  | -2.080923 | 0.847585  |
| C | -1.333291 | -1.643586 | 0.014829  |
| C | -1.140884 | -1.679370 | -1.370975 |
| C | -2.555591 | -2.069621 | 0.541011  |
| C | -2.159895 | -2.110672 | -2.217290 |
| H | -0.189379 | -1.363566 | -1.791561 |
| C | -3.578273 | -2.496773 | -0.306458 |
| H | -2.723383 | -2.073872 | 1.613273  |
| C | -3.386141 | -2.512208 | -1.687171 |

|   |           |           |           |
|---|-----------|-----------|-----------|
| H | -1.997093 | -2.127291 | -3.290246 |
| H | -4.525154 | -2.817243 | 0.116149  |
| H | -4.184142 | -2.840598 | -2.345184 |
| C | 0.255879  | 1.204128  | 0.084038  |
| H | 0.144310  | 1.410581  | -0.986336 |
| C | 0.735274  | -0.189922 | 0.314730  |
| C | 1.959942  | -0.747552 | 0.305955  |
| C | -1.451342 | 0.720711  | 1.974434  |
| H | -2.510692 | 0.461007  | 1.891077  |
| H | -1.349261 | 1.411822  | 2.815954  |
| C | -0.633970 | -0.552120 | 2.246385  |
| H | 0.270711  | -0.316256 | 2.814136  |
| H | -1.222507 | -1.245617 | 2.850910  |
| N | -1.057202 | 1.383991  | 0.716348  |
| H | 0.987150  | 1.926131  | 0.472028  |
| C | 3.272924  | -0.222280 | -0.079749 |
| S | -2.189163 | 2.309055  | -0.039952 |
| O | -3.058577 | 2.859871  | 0.997549  |
| O | -1.476844 | 3.208803  | -0.945981 |
| C | -3.171269 | 1.202839  | -1.032970 |
| H | -3.969640 | 1.797164  | -1.479709 |
| H | -2.527573 | 0.770119  | -1.799239 |
| H | -3.579571 | 0.423098  | -0.386896 |
| C | 3.378444  | 0.873217  | -0.948608 |
| C | 4.627808  | 1.385296  | -1.289039 |
| C | 5.786762  | 0.805424  | -0.773035 |
| C | 5.689915  | -0.292796 | 0.082494  |
| C | 4.442834  | -0.806108 | 0.427761  |
| H | 2.485923  | 1.313705  | -1.382325 |
| H | 4.695331  | 2.231867  | -1.964641 |
| H | 6.760201  | 1.203633  | -1.040716 |
| H | 6.588551  | -0.750550 | 0.483585  |
| H | 4.366019  | -1.658447 | 1.094371  |

B\_R1Ph\_R2Ph\_XNMs\_conf7

SCF Energy: -1447.83529468

Num. Imaginary Frequencies: 0

|   |           |           |           |
|---|-----------|-----------|-----------|
| C | -1.481702 | 0.271432  | -0.831920 |
| N | -1.393964 | 1.453432  | -1.735770 |
| N | -0.373059 | 2.118607  | -1.479927 |
| C | -2.781659 | 0.445846  | -0.052709 |
| C | -2.789245 | 0.944903  | 1.251760  |
| C | -3.998195 | 0.155906  | -0.680462 |
| C | -3.996227 | 1.130903  | 1.927736  |
| H | -1.854523 | 1.192830  | 1.746317  |
| C | -5.201820 | 0.347142  | -0.007895 |
| H | -4.005363 | -0.214120 | -1.702055 |
| C | -5.203642 | 0.831563  | 1.301448  |
| H | -3.987934 | 1.511147  | 2.944252  |
| H | -6.138632 | 0.120060  | -0.506630 |
| H | -6.141810 | 0.975983  | 1.827546  |
| C | 0.179474  | -0.781972 | 0.805727  |
| H | -0.578160 | -0.991681 | 1.570011  |
| C | -0.229609 | 0.382080  | -0.027694 |
| C | 0.423603  | 1.474647  | -0.452155 |
| C | -0.056042 | -1.724814 | -1.535100 |
| H | -0.075713 | -2.693303 | -2.033294 |
| H | 0.708606  | -1.100260 | -2.016028 |
| C | -1.431198 | -1.069102 | -1.625814 |
| H | -1.685198 | -0.891119 | -2.674323 |
| H | -2.173925 | -1.753201 | -1.207088 |

|   |          |           |           |
|---|----------|-----------|-----------|
| N | 0.264335 | -1.967906 | -0.106240 |
| H | 1.137834 | -0.598622 | 1.298076  |
| C | 1.730889 | 2.055859  | -0.115341 |
| S | 1.584626 | -2.952415 | 0.167965  |
| O | 1.593855 | -3.954214 | -0.895809 |
| O | 2.800805 | -2.159993 | 0.381319  |
| C | 1.163456 | -3.725650 | 1.710937  |
| H | 2.001777 | -4.374217 | 1.968613  |
| H | 1.037007 | -2.953475 | 2.470571  |
| H | 0.248251 | -4.297856 | 1.567060  |
| C | 1.870069 | 3.449252  | -0.063044 |
| C | 3.098262 | 4.019264  | 0.261284  |
| C | 4.199915 | 3.204679  | 0.526615  |
| C | 4.070051 | 1.817536  | 0.458414  |
| C | 2.843228 | 1.240953  | 0.135272  |
| H | 1.011667 | 4.079762  | -0.273683 |
| H | 3.196063 | 5.099265  | 0.304879  |
| H | 5.157877 | 3.649822  | 0.776068  |
| H | 4.928083 | 1.179691  | 0.645664  |
| H | 2.763971 | 0.160100  | 0.053710  |

B\_R1Ph\_R2Ph\_XNMs\_conf8  
SCF Energy: -1447.84294366  
Num. Imaginary Frequencies: 0

|   |           |           |           |
|---|-----------|-----------|-----------|
| C | 0.182923  | -1.184266 | -0.919008 |
| N | -0.703340 | -2.336270 | -1.200993 |
| N | -1.871947 | -2.070306 | -0.851564 |
| C | 1.324446  | -1.638581 | -0.017397 |
| C | 2.546382  | -2.064893 | -0.543455 |
| C | 1.130390  | -1.678327 | 1.368312  |
| C | 3.567146  | -2.497231 | 0.303950  |
| H | 2.715770  | -2.065147 | -1.615516 |
| C | 2.147217  | -2.115182 | 2.214316  |
| H | 0.179116  | -1.361995 | 1.788790  |
| C | 3.373372  | -2.517693 | 1.684151  |
| H | 4.514001  | -2.817949 | -0.118640 |
| H | 1.982968  | -2.135380 | 3.286985  |
| H | 4.169749  | -2.850450 | 2.341947  |
| C | -0.255747 | 1.209565  | -0.079577 |
| H | -0.158063 | 1.422871  | 0.990131  |
| C | -0.742461 | -0.181914 | -0.313423 |
| C | -1.967836 | -0.737998 | -0.306872 |
| C | 1.433915  | 0.740301  | -1.975096 |
| H | 2.499374  | 0.496580  | -1.929922 |
| H | 1.295131  | 1.447920  | -2.797837 |
| C | 0.626792  | -0.541523 | -2.247657 |
| H | -0.278050 | -0.311913 | -2.817584 |
| H | 1.219736  | -1.233101 | -2.849887 |
| N | 1.069059  | 1.364513  | -0.690367 |
| H | -0.972588 | 1.935924  | -0.487035 |
| C | -3.280947 | -0.212914 | 0.079078  |
| S | 2.207906  | 2.290504  | 0.054461  |
| O | 3.002106  | 2.935712  | -0.989527 |
| O | 1.514206  | 3.108341  | 1.048450  |
| C | 3.282310  | 1.165130  | 0.921637  |
| H | 4.069429  | 1.765795  | 1.379654  |
| H | 2.693234  | 0.642068  | 1.675756  |
| H | 3.702336  | 0.459430  | 0.203140  |
| C | -3.386719 | 0.894646  | 0.932636  |
| C | -4.636410 | 1.405725  | 1.273177  |
| C | -5.795798 | 0.813235  | 0.772682  |

|   |           |           |           |
|---|-----------|-----------|-----------|
| C | -5.698724 | -0.296603 | -0.067585 |
| C | -4.451270 | -0.808997 | -0.413050 |
| H | -2.494143 | 1.346547  | 1.354095  |
| H | -4.703739 | 2.261851  | 1.936663  |
| H | -6.769466 | 1.210813  | 1.040473  |
| H | -6.597501 | -0.764366 | -0.456642 |
| H | -4.374576 | -1.670428 | -1.067782 |

B\_R1Ph\_R2Ph\_XNMs\_conf9  
SCF Energy: -1447.84156793  
Num. Imaginary Frequencies: 0

|   |           |           |           |
|---|-----------|-----------|-----------|
| C | -0.281152 | -0.968057 | 1.011254  |
| N | 0.591544  | -2.044382 | 1.554560  |
| N | 1.775750  | -1.848862 | 1.219490  |
| C | -1.295728 | -1.647362 | 0.088917  |
| C | -1.101848 | -1.670281 | -1.296435 |
| C | -2.407068 | -2.307315 | 0.624371  |
| C | -2.030087 | -2.290184 | -2.133615 |
| H | -0.226354 | -1.201513 | -1.735087 |
| C | -3.333132 | -2.928028 | -0.210510 |
| H | -2.556577 | -2.345678 | 1.698986  |
| C | -3.155582 | -2.909246 | -1.594526 |
| H | -1.870814 | -2.283250 | -3.207061 |
| H | -4.193471 | -3.428494 | 0.222131  |
| H | -3.883132 | -3.383540 | -2.245090 |
| C | 0.232808  | 1.215966  | -0.284198 |
| H | -0.073413 | 1.125828  | -1.332005 |
| C | 0.687610  | -0.089497 | 0.284775  |
| C | 1.903112  | -0.643372 | 0.431327  |
| C | -0.857211 | 1.346992  | 1.936486  |
| H | -1.666432 | 1.868529  | 2.448765  |
| H | 0.086869  | 1.751477  | 2.317416  |
| C | -0.923602 | -0.171785 | 2.187147  |
| H | -0.388558 | -0.403611 | 3.112173  |
| H | -1.958867 | -0.487351 | 2.324791  |
| N | -0.911155 | 1.677318  | 0.511993  |
| H | 1.041427  | 1.957161  | -0.238382 |
| C | 3.228643  | -0.223325 | -0.031966 |
| S | -2.268991 | 2.281773  | -0.190072 |
| O | -2.875490 | 3.198371  | 0.773486  |
| O | -1.865022 | 2.767981  | -1.508237 |
| C | -3.433014 | 0.952346  | -0.434535 |
| H | -4.332687 | 1.403983  | -0.855790 |
| H | -3.000868 | 0.223886  | -1.121992 |
| H | -3.649396 | 0.498644  | 0.533827  |
| C | 3.365645  | 0.561458  | -1.185362 |
| C | 4.625413  | 0.982986  | -1.603923 |
| C | 5.761106  | 0.617077  | -0.881588 |
| C | 5.632964  | -0.177558 | 0.258745  |
| C | 4.375588  | -0.598646 | 0.682034  |
| H | 2.489735  | 0.818246  | -1.774177 |
| H | 4.720153  | 1.587234  | -2.500324 |
| H | 6.742777  | 0.942755  | -1.210417 |
| H | 6.514873  | -0.469565 | 0.819847  |
| H | 4.272919  | -1.215455 | 1.568875  |

B\_R1Ph\_R2Ph\_XNMs  
SCF Energy: -1447.84640003  
Num. Imaginary Frequencies: 0

|   |           |           |           |   |           |           |           |
|---|-----------|-----------|-----------|---|-----------|-----------|-----------|
| C | 0.900891  | -1.026083 | -0.929880 | H | -1.066628 | 4.878220  | -1.831542 |
| N | 0.278068  | -2.131841 | -1.697319 | C | 0.740423  | -0.842231 | 0.049039  |
| N | -0.936293 | -2.213463 | -1.424251 | H | 0.528685  | -0.906821 | -1.024956 |
| C | 2.013681  | -1.631773 | -0.076452 | C | -0.205951 | 0.174899  | 0.718837  |
| C | 3.203973  | -2.052111 | -0.680731 | C | -1.520843 | -0.461868 | 1.131067  |
| C | 1.843192  | -1.838353 | 1.295760  | C | 2.501609  | 0.792909  | 0.976813  |
| C | 4.212211  | -2.642841 | 0.076903  | H | 2.281385  | 1.651932  | 0.333977  |
| H | 3.344181  | -1.937021 | -1.750875 | H | 3.573938  | 0.772715  | 1.168291  |
| C | 2.854336  | -2.427801 | 2.055316  | C | 1.735311  | 0.905400  | 2.301105  |
| H | 0.915450  | -1.549924 | 1.780693  | H | 2.217609  | 0.318589  | 3.087238  |
| C | 4.043538  | -2.826334 | 1.449812  | H | 1.721990  | 1.952686  | 2.622073  |
| H | 5.128414  | -2.964533 | -0.407827 | N | 2.148945  | -0.470370 | 0.305779  |
| H | 2.706777  | -2.575932 | 3.120301  | H | 0.557209  | -1.831230 | 0.476533  |
| H | 4.831140  | -3.283291 | 2.040211  | C | -2.567221 | -0.958532 | 0.224295  |
| C | -0.106849 | 0.848667  | 0.549808  | S | 3.294054  | -1.279891 | -0.558948 |
| H | 0.539536  | 0.731406  | 1.434901  | O | 2.767775  | -2.623861 | -0.782257 |
| C | -0.250281 | -0.453568 | -0.166716 | C | 3.414945  | -0.473963 | -2.145287 |
| C | -1.327067 | -1.195379 | -0.475394 | O | 4.572411  | -1.098461 | 0.122743  |
| C | 1.712920  | 1.333654  | -1.087826 | H | 4.197189  | -0.987225 | -2.706294 |
| H | 2.508317  | 1.121299  | -0.356188 | H | 2.458131  | -0.570114 | -2.660188 |
| H | 2.051106  | 2.125544  | -1.757067 | H | 3.681615  | 0.571208  | -1.981779 |
| C | 1.396234  | 0.073908  | -1.892323 | C | -2.469878 | -0.783048 | -1.161905 |
| H | 0.606574  | 0.292986  | -2.617641 | C | -3.466541 | -1.272544 | -2.004981 |
| H | 2.283873  | -0.251118 | -2.437888 | C | -4.567465 | -1.939222 | -1.472483 |
| N | 0.489391  | 1.802239  | -0.414059 | C | -4.671226 | -2.116840 | -0.090023 |
| H | -1.074472 | 1.240585  | 0.862947  | C | -3.679757 | -1.631816 | 0.753406  |
| C | -2.729984 | -1.109863 | -0.055084 | H | -1.627617 | -0.250354 | -1.591280 |
| S | 0.464759  | 3.400429  | 0.046143  | H | -3.380793 | -1.128950 | -3.077054 |
| O | 0.896428  | 4.178256  | -1.111093 | H | -5.342801 | -2.320395 | -2.129341 |
| O | -0.849342 | 3.642517  | 0.634583  | H | -5.526294 | -2.637763 | 0.328456  |
| C | 1.691055  | 3.600868  | 1.325923  | H | -3.749703 | -1.770822 | 1.826884  |
| H | 1.666197  | 4.650222  | 1.622729  |   |           |           |           |
| H | 1.429238  | 2.960228  | 2.168604  |   |           |           |           |
| H | 2.668354  | 3.343064  | 0.916736  |   |           |           |           |
| C | -3.062363 | -0.689486 | 1.239554  |   |           |           |           |
| C | -4.396967 | -0.588076 | 1.624389  |   |           |           |           |
| C | -5.410728 | -0.916761 | 0.724340  |   |           |           |           |
| C | -5.085331 | -1.353958 | -0.560441 |   |           |           |           |
| C | -3.752385 | -1.453599 | -0.949731 |   |           |           |           |
| H | -2.274129 | -0.469595 | 1.954364  |   |           |           |           |
| H | -4.644337 | -0.263732 | 2.629996  |   |           |           |           |
| H | -6.450569 | -0.840701 | 1.025714  |   |           |           |           |
| H | -5.871428 | -1.616589 | -1.261038 |   |           |           |           |
| H | -3.495686 | -1.791156 | -1.948837 |   |           |           |           |

C\_R1Ph\_R2Ph\_XNMs\_conf10  
SCF Energy: -1447.85253654  
Num. Imaginary Frequencies: 0

|   |           |           |           |
|---|-----------|-----------|-----------|
| C | 0.342749  | 0.401835  | 2.106154  |
| N | -0.453838 | -0.004377 | 3.024737  |
| N | -1.631613 | -0.520009 | 2.415291  |
| C | -0.414538 | 1.492835  | -0.031304 |
| C | 0.201529  | 1.775921  | -1.251079 |
| C | -1.262512 | 2.449138  | 0.538353  |
| C | -0.032385 | 2.990538  | -1.896940 |
| H | 0.876168  | 1.059677  | -1.710519 |
| C | -1.497477 | 3.660955  | -0.104797 |
| H | -1.747393 | 2.239743  | 1.489846  |
| C | -0.883579 | 3.934801  | -1.327794 |
| H | 0.454672  | 3.194170  | -2.845095 |
| H | -2.161313 | 4.389858  | 0.348524  |

C\_R1Ph\_R2Ph\_XNMs\_conf11  
SCF Energy: -1447.85101199  
Num. Imaginary Frequencies: 0

|   |           |           |           |
|---|-----------|-----------|-----------|
| C | 0.616481  | 0.433828  | 1.819256  |
| N | 0.081916  | -0.210505 | 2.790812  |
| N | -1.091738 | -0.860670 | 2.320520  |
| C | -0.694708 | 1.576715  | -0.019654 |
| C | -0.356091 | 2.075731  | -1.279044 |
| C | -1.585288 | 2.299081  | 0.781737  |
| C | -0.908398 | 3.273552  | -1.734279 |
| H | 0.349472  | 1.545774  | -1.913478 |
| C | -2.135431 | 3.494971  | 0.328446  |
| H | -1.854806 | 1.918327  | 1.765008  |
| C | -1.800257 | 3.984704  | -0.934463 |
| H | -0.635305 | 3.649004  | -2.715206 |
| H | -2.827298 | 4.041842  | 0.960738  |
| H | -2.229920 | 4.915293  | -1.290579 |
| C | 0.823103  | -0.501874 | -0.417518 |
| H | 0.417968  | -0.527245 | -1.434457 |
| C | -0.137624 | 0.259496  | 0.523262  |
| C | -1.233150 | -0.646613 | 1.055742  |
| C | 2.424746  | 1.303423  | 0.397793  |
| H | 1.912572  | 2.135921  | -0.086916 |
| H | 3.491993  | 1.515572  | 0.369046  |
| C | 1.930681  | 1.142459  | 1.841907  |
| H | 2.636439  | 0.569162  | 2.450633  |
| H | 1.825146  | 2.133114  | 2.298631  |
| N | 2.178939  | 0.102526  | -0.429380 |
| H | 0.889289  | -1.532517 | -0.052595 |



|   |           |           |           |
|---|-----------|-----------|-----------|
| C | -2.337591 | -1.227177 | 0.275907  |
| S | 3.419454  | -1.023318 | -0.485745 |
| O | 3.153024  | -2.148072 | 0.414166  |
| C | 3.305750  | -1.625553 | -2.153974 |
| O | 4.670874  | -0.286473 | -0.323602 |
| H | 4.083683  | -2.382474 | -2.262063 |
| H | 2.322433  | -2.073585 | -2.301532 |
| H | 3.470153  | -0.788543 | -2.830946 |
| C | -3.212703 | -2.139188 | 0.887448  |
| C | -4.253167 | -2.705967 | 0.162286  |
| C | -4.435609 | -2.374094 | -1.183134 |
| C | -3.571237 | -1.470815 | -1.797166 |
| C | -2.526636 | -0.898528 | -1.072520 |
| H | -3.060774 | -2.396313 | 1.930213  |
| H | -4.923163 | -3.410853 | 0.643870  |
| H | -5.248802 | -2.819009 | -1.747648 |
| H | -3.708551 | -1.206015 | -2.840430 |
| H | -1.874026 | -0.182367 | -1.560746 |

C\_R1Ph\_R2Ph\_XNMs\_conf12  
 SCF Energy: -1447.85253629  
 Num. Imaginary Frequencies: 0

|   |           |           |           |
|---|-----------|-----------|-----------|
| C | 0.342751  | 0.402509  | 2.105955  |
| N | -0.453743 | -0.003638 | 3.024685  |
| N | -1.631486 | -0.519583 | 2.415417  |
| C | -0.414723 | 1.492899  | -0.031683 |
| C | 0.201388  | 1.775844  | -1.251467 |
| C | -1.262849 | 2.449199  | 0.537750  |
| C | -0.032615 | 2.990327  | -1.897547 |
| H | 0.876113  | 1.059577  | -1.710753 |
| C | -1.497900 | 3.660882  | -0.105616 |
| H | -1.747774 | 2.239906  | 1.489244  |
| C | -0.883945 | 3.934593  | -1.328614 |
| H | 0.454478  | 3.193850  | -2.845708 |
| H | -2.161850 | 4.389788  | 0.347536  |
| H | -1.067060 | 4.877911  | -1.832531 |
| C | 0.740434  | -0.842080 | 0.049147  |
| H | 0.528809  | -0.906794 | -1.024855 |
| C | -0.206000 | 0.175145  | 0.718736  |
| C | -1.520786 | -0.461715 | 1.131174  |
| C | 2.501597  | 0.793244  | 0.976499  |
| H | 2.281352  | 1.651974  | 0.333278  |
| H | 3.573922  | 0.773174  | 1.168014  |
| C | 1.735249  | 0.906256  | 2.300726  |
| H | 2.217485  | 0.319796  | 3.087170  |
| H | 1.721853  | 1.953689  | 2.621208  |
| N | 2.148986  | -0.470283 | 0.305948  |
| H | 0.557164  | -1.831032 | 0.476728  |
| C | -2.567127 | -0.958689 | 0.224533  |
| S | 3.294145  | -1.280014 | -0.558571 |
| O | 2.767841  | -2.623973 | -0.781657 |
| C | 3.415173  | -0.474322 | -2.145029 |
| O | 4.572449  | -1.098467 | 0.123167  |
| H | 4.197443  | -0.987698 | -2.705894 |
| H | 2.458411  | -0.570446 | -2.660032 |
| H | 3.681907  | 0.570851  | -1.981628 |
| C | -2.469537 | -0.783906 | -1.161735 |
| C | -3.466146 | -1.273641 | -2.004736 |
| C | -4.567275 | -1.939851 | -1.472085 |
| C | -4.671286 | -2.116768 | -0.089551 |
| C | -3.679863 | -1.631524 | 0.753798  |

|   |           |           |           |
|---|-----------|-----------|-----------|
| H | -1.627105 | -0.251586 | -1.591243 |
| H | -3.380193 | -1.130599 | -3.076866 |
| H | -5.342580 | -2.321202 | -2.128876 |
| H | -5.526522 | -2.637320 | 0.329045  |
| H | -3.750022 | -1.769974 | 1.827334  |

C\_R1Ph\_R2Ph\_XNMs\_conf13  
 SCF Energy: -1447.85377784  
 Num. Imaginary Frequencies: 0

|   |           |           |           |
|---|-----------|-----------|-----------|
| C | 0.549049  | 0.265247  | 1.920916  |
| N | -0.063410 | -0.372058 | 2.850241  |
| N | -1.259553 | -0.923819 | 2.317007  |
| C | -0.598056 | 1.538583  | 0.050872  |
| C | -0.181294 | 2.019953  | -1.191992 |
| C | -1.455504 | 2.318446  | 0.833887  |
| C | -0.625048 | 3.261694  | -1.648142 |
| H | 0.500965  | 1.440895  | -1.808455 |
| C | -1.896944 | 3.557985  | 0.378743  |
| H | -1.784911 | 1.948988  | 1.803232  |
| C | -1.484129 | 4.032042  | -0.867097 |
| H | -0.293314 | 3.624602  | -2.615595 |
| H | -2.564508 | 4.150875  | 0.995508  |
| H | -1.828709 | 4.996796  | -1.224904 |
| C | 0.793991  | -0.622621 | -0.314621 |
| H | 0.409077  | -0.687014 | -1.335454 |
| C | -0.161008 | 0.177643  | 0.592240  |
| C | -1.335594 | -0.666036 | 1.054237  |
| C | 2.460220  | 1.102880  | 0.605246  |
| H | 2.045216  | 2.026193  | 0.194579  |
| H | 3.544237  | 1.222424  | 0.618223  |
| C | 1.913206  | 0.866437  | 2.019585  |
| H | 2.552925  | 0.197909  | 2.603990  |
| H | 1.873211  | 1.824552  | 2.549167  |
| N | 2.135372  | 0.006266  | -0.329763 |
| H | 0.847631  | -1.645881 | 0.078319  |
| C | -2.448823 | -1.143912 | 0.219277  |
| S | 3.366476  | -0.975421 | -0.838260 |
| O | 4.507177  | -0.120413 | -1.153105 |
| C | 3.831259  | -1.999049 | 0.547753  |
| O | 2.793450  | -1.837774 | -1.868176 |
| H | 4.597477  | -2.689639 | 0.192585  |
| H | 4.231735  | -1.353598 | 1.330145  |
| H | 2.953488  | -2.546616 | 0.893310  |
| C | -3.413049 | -1.998909 | 0.776978  |
| C | -4.464959 | -2.469444 | 0.001319  |
| C | -4.570184 | -2.096629 | -1.341684 |
| C | -3.617372 | -1.249447 | -1.902257 |
| C | -2.560811 | -0.773461 | -1.126953 |
| H | -3.321775 | -2.288032 | 1.818458  |
| H | -5.204331 | -3.130723 | 0.441435  |
| H | -5.392330 | -2.466511 | -1.946019 |
| H | -3.693608 | -0.953923 | -2.943462 |
| H | -1.837661 | -0.100206 | -1.574901 |

C\_R1Ph\_R2Ph\_XNMs\_conf1  
 SCF Energy: -1447.86328488  
 Num. Imaginary Frequencies: 0

|   |           |           |          |
|---|-----------|-----------|----------|
| C | 0.295887  | 0.321220  | 2.172502 |
| N | -0.535701 | -0.087333 | 3.060418 |

|   |           |           |           |
|---|-----------|-----------|-----------|
| N | -1.709500 | -0.555477 | 2.404672  |
| C | -0.349918 | 1.481809  | 0.036084  |
| C | 0.308420  | 1.759153  | -1.163550 |
| C | -1.173138 | 2.459821  | 0.606133  |
| C | 0.133538  | 2.996429  | -1.786713 |
| H | 0.962713  | 1.025435  | -1.623696 |
| C | -1.344491 | 3.693238  | -0.015507 |
| H | -1.689093 | 2.250662  | 1.541466  |
| C | -0.690446 | 3.964802  | -1.218123 |
| H | 0.649049  | 3.198812  | -2.720195 |
| H | -1.989346 | 4.439380  | 0.437489  |
| H | -0.822416 | 4.924875  | -1.706610 |
| C | 0.732327  | -0.881704 | 0.109765  |
| H | 0.506538  | -1.008476 | -0.950680 |
| C | -0.219960 | 0.145724  | 0.766091  |
| C | -1.561382 | -0.463344 | 1.125300  |
| C | 2.589456  | -0.299428 | 1.646009  |
| H | 3.626994  | 0.033395  | 1.632241  |
| H | 2.527917  | -1.279011 | 2.143061  |
| C | 1.711175  | 0.714998  | 2.401250  |
| H | 1.948598  | 0.703768  | 3.466485  |
| H | 1.893835  | 1.715813  | 1.995643  |
| N | 2.111501  | -0.396662 | 0.257341  |
| H | 0.601105  | -1.849816 | 0.615687  |
| C | -2.595908 | -0.906611 | 0.177570  |
| S | 3.207665  | -0.893388 | -0.890928 |
| O | 4.448133  | -0.171944 | -0.628939 |
| C | 3.503422  | -2.628107 | -0.612667 |
| O | 2.542265  | -0.745388 | -2.183230 |
| H | 4.225323  | -2.953526 | -1.362803 |
| H | 3.911071  | -2.752710 | 0.391259  |
| H | 2.560800  | -3.163961 | -0.729689 |
| C | -2.453940 | -0.695566 | -1.199910 |
| C | -3.439338 | -1.132854 | -2.083865 |
| C | -4.572735 | -1.783360 | -1.601511 |
| C | -4.720718 | -1.996807 | -0.228173 |
| C | -3.740657 | -1.563545 | 0.656011  |
| H | -1.586299 | -0.173366 | -1.589949 |
| H | -3.319363 | -0.960803 | -3.148426 |
| H | -5.339524 | -2.123158 | -2.290361 |
| H | -5.601734 | -2.504332 | 0.151219  |
| H | -3.845658 | -1.729019 | 1.722870  |

D\_R1Ph\_R2Ph\_XNMs\_conf2  
 SCF Energy: -1447.88974312  
 Num. Imaginary Frequencies: 0

|   |           |           |           |
|---|-----------|-----------|-----------|
| C | 0.601116  | -0.786759 | -0.086058 |
| N | 1.846769  | -0.236371 | -0.116269 |
| N | 1.799826  | 1.108874  | -0.138353 |
| C | 3.101477  | -0.902311 | -0.093329 |
| C | 3.276084  | -2.085769 | -0.810530 |
| C | 4.149982  | -0.352381 | 0.645740  |
| C | 4.508040  | -2.736075 | -0.765311 |
| H | 2.468205  | -2.481958 | -1.416212 |
| C | 5.380406  | -1.002662 | 0.669268  |
| H | 3.990000  | 0.572121  | 1.188936  |
| C | 5.561814  | -2.198078 | -0.028290 |
| H | 4.645068  | -3.656677 | -1.322949 |
| H | 6.197794  | -0.577252 | 1.242323  |
| H | 6.521322  | -2.703748 | -0.001638 |
| C | -1.778751 | 0.058120  | -0.014735 |

|   |           |           |           |
|---|-----------|-----------|-----------|
| H | -2.308080 | 0.504103  | -0.857154 |
| C | -0.295119 | 0.258210  | -0.110564 |
| C | 0.508209  | 1.431178  | -0.130599 |
| C | -1.157920 | -2.240874 | 0.745963  |
| H | -1.557966 | -3.255075 | 0.750867  |
| H | -1.103024 | -1.868435 | 1.778968  |
| C | 0.233641  | -2.222492 | 0.109187  |
| H | 0.950666  | -2.726840 | 0.764551  |
| H | 0.201405  | -2.764661 | -0.841378 |
| N | -2.053117 | -1.392322 | -0.058974 |
| H | -2.161311 | 0.516160  | 0.912149  |
| C | 0.103232  | 2.849613  | -0.105449 |
| S | -3.655103 | -1.821202 | -0.101329 |
| C | -4.320558 | -1.547276 | 1.531135  |
| O | -4.310049 | -0.892989 | -1.019081 |
| O | -3.705419 | -3.256814 | -0.364707 |
| H | -5.369133 | -1.845935 | 1.499151  |
| H | -3.768584 | -2.165721 | 2.239881  |
| H | -4.233813 | -0.487871 | 1.773935  |
| C | -1.130016 | 3.264456  | -0.622089 |
| C | -1.498736 | 4.608512  | -0.583476 |
| C | -0.638711 | 5.556492  | -0.031797 |
| C | 0.595416  | 5.151857  | 0.480700  |
| C | 0.962600  | 3.809994  | 0.447452  |
| H | -1.799755 | 2.544975  | -1.080661 |
| H | -2.456600 | 4.913581  | -0.992816 |
| H | -0.926258 | 6.602619  | -0.001736 |
| H | 1.270791  | 5.883322  | 0.913504  |
| H | 1.917091  | 3.491152  | 0.853705  |

E\_R1Ph\_R2Ph\_XNMs\_conf1  
 SCF Energy: -1447.84885355  
 Num. Imaginary Frequencies: 0

|   |           |           |           |
|---|-----------|-----------|-----------|
| C | 1.963567  | -1.162542 | 0.205829  |
| N | 1.772290  | -2.253699 | 0.860581  |
| N | 0.381556  | -2.565090 | 0.859403  |
| C | 3.302766  | -0.545447 | 0.092435  |
| C | 3.899177  | -0.317017 | -1.153580 |
| C | 3.989902  | -0.195657 | 1.261242  |
| C | 5.166535  | 0.257862  | -1.226440 |
| H | 3.393361  | -0.621037 | -2.064780 |
| C | 5.253051  | 0.386539  | 1.183921  |
| H | 3.525829  | -0.380976 | 2.225277  |
| C | 5.841687  | 0.616206  | -0.059654 |
| H | 5.628436  | 0.419434  | -2.194992 |
| H | 5.777677  | 0.658060  | 2.094268  |
| H | 6.826893  | 1.067451  | -0.119416 |
| C | 0.360194  | 0.754049  | 0.502871  |
| H | 1.268415  | 1.368519  | 0.542676  |
| C | 0.665834  | -0.560583 | -0.268357 |
| C | -0.255944 | -1.656183 | 0.208120  |
| C | -0.619737 | 0.926493  | -1.732258 |
| H | -0.408702 | 1.758142  | -2.410751 |
| H | -1.577731 | 0.480568  | -2.005718 |
| C | 0.534784  | -0.091391 | -1.731459 |
| H | 0.371570  | -0.914282 | -2.429986 |
| H | 1.460490  | 0.416529  | -2.011518 |
| N | -0.664140 | 1.374804  | -0.330951 |
| H | -0.009910 | 0.584114  | 1.515722  |
| C | -1.729856 | -1.687443 | 0.074274  |
| S | -1.968667 | 2.156155  | 0.287031  |

|   |           |           |           |   |          |           |           |
|---|-----------|-----------|-----------|---|----------|-----------|-----------|
| O | -3.098589 | 1.904321  | -0.604936 | H | 5.684325 | -1.756550 | 0.043784  |
| O | -2.063445 | 1.818027  | 1.705927  | H | 4.445563 | -2.159788 | -2.071670 |
| C | -1.575114 | 3.888636  | 0.172987  | H | 1.963519 | -2.219431 | -2.062197 |
| H | -2.433228 | 4.442698  | 0.555777  |   |          |           |           |
| H | -0.689000 | 4.075582  | 0.779641  |   |          |           |           |
| H | -1.395223 | 4.129085  | -0.875132 |   |          |           |           |
| C | -2.334560 | -1.880093 | -1.173353 |   |          |           |           |
| C | -3.722509 | -1.934624 | -1.275706 |   |          |           |           |
| C | -4.513875 | -1.788686 | -0.135664 |   |          |           |           |
| C | -3.914763 | -1.596971 | 1.108601  |   |          |           |           |
| C | -2.526125 | -1.552418 | 1.215988  |   |          |           |           |
| H | -1.721076 | -2.011435 | -2.060494 |   |          |           |           |
| H | -4.185171 | -2.094373 | -2.244248 |   |          |           |           |
| H | -5.595404 | -1.825857 | -0.217991 |   |          |           |           |
| H | -4.526933 | -1.482289 | 1.997235  |   |          |           |           |
| H | -2.053374 | -1.403676 | 2.181989  |   |          |           |           |

E\_R1Ph\_R2Ph\_XNMs\_conf2  
SCF Energy: -1447.85589275  
Num. Imaginary Frequencies: 0

|   |           |           |           |
|---|-----------|-----------|-----------|
| C | -1.874804 | -1.255775 | -0.113854 |
| N | -1.735301 | -2.494611 | -0.445741 |
| N | -0.360826 | -2.848064 | -0.393186 |
| C | -3.191079 | -0.595495 | -0.076823 |
| C | -4.351325 | -1.368175 | -0.244262 |
| C | -3.315661 | 0.788662  | 0.112202  |
| C | -5.604368 | -0.768697 | -0.224240 |
| H | -4.253280 | -2.438971 | -0.386421 |
| C | -4.575088 | 1.386024  | 0.130682  |
| H | -2.439821 | 1.417217  | 0.244032  |
| C | -5.720340 | 0.611082  | -0.037038 |
| H | -6.493899 | -1.376813 | -0.352669 |
| H | -4.656495 | 2.458208  | 0.275349  |
| H | -6.700000 | 1.077819  | -0.021241 |
| C | -0.118115 | 0.548106  | -0.689202 |
| H | -0.950628 | 0.939763  | -1.275711 |
| C | -0.549717 | -0.621451 | 0.237487  |
| C | 0.322790  | -1.833544 | 0.002611  |
| C | 0.520192  | 1.096234  | 1.617867  |
| H | 0.286227  | 1.898191  | 2.318290  |
| H | 1.537743  | 0.740931  | 1.818503  |
| C | -0.492922 | -0.044723 | 1.679684  |
| H | -0.223130 | -0.806512 | 2.413556  |
| H | -1.476564 | 0.341283  | 1.953624  |
| N | 0.380736  | 1.587378  | 0.233292  |
| H | 0.653926  | 0.217389  | -1.393679 |
| C | 1.802279  | -1.843261 | 0.050254  |
| S | 1.556691  | 2.602031  | -0.337987 |
| O | 1.143118  | 2.996769  | -1.681550 |
| O | 1.767883  | 3.613388  | 0.693535  |
| C | 3.057993  | 1.644423  | -0.481579 |
| H | 3.815955  | 2.318496  | -0.883406 |
| H | 3.349589  | 1.289649  | 0.507733  |
| H | 2.889124  | 0.809816  | -1.164518 |
| C | 2.505315  | -1.632812 | 1.242705  |
| C | 3.898461  | -1.606285 | 1.238518  |
| C | 4.599508  | -1.784488 | 0.045172  |
| C | 3.904795  | -2.010627 | -1.142791 |
| C | 2.511286  | -2.044319 | -1.140778 |
| H | 1.969612  | -1.516093 | 2.179903  |
| H | 4.435703  | -1.450544 | 2.168413  |

E\_R1Ph\_R2Ph\_XNMs\_conf3  
SCF Energy: -1447.84887340  
Num. Imaginary Frequencies: 0

|   |           |           |           |
|---|-----------|-----------|-----------|
| C | -0.237054 | -1.612808 | -0.208836 |
| N | 0.396199  | -2.518412 | -0.869590 |
| N | 1.787323  | -2.211230 | -0.872714 |
| C | -1.709910 | -1.646000 | -0.065582 |
| C | -2.304786 | -1.829853 | 1.188068  |
| C | -2.515284 | -1.524666 | -1.202259 |
| C | -3.691093 | -1.888098 | 1.301484  |
| H | -1.684305 | -1.952448 | 2.071640  |
| C | -3.902703 | -1.573855 | -1.083725 |
| H | -2.050199 | -1.381742 | -2.172853 |
| C | -4.491366 | -1.755860 | 0.166374  |
| H | -4.145858 | -2.040830 | 2.274984  |
| H | -4.521977 | -1.469870 | -1.968846 |
| H | -5.572197 | -1.796266 | 0.257321  |
| C | 0.393325  | 0.797731  | -0.496495 |
| H | 0.027176  | 0.635864  | -1.511509 |
| C | 0.689261  | -0.522682 | 0.270829  |
| C | 1.983953  | -1.126352 | -0.208786 |
| C | -0.590257 | 0.967775  | 1.729936  |
| H | -1.551089 | 0.516671  | 1.984557  |
| H | -0.388536 | 1.790264  | 2.421673  |
| C | 0.561764  | -0.052048 | 1.732470  |
| H | 1.489036  | 0.453888  | 2.011191  |
| H | 0.395917  | -0.872264 | 2.433593  |
| N | -0.621445 | 1.445344  | 0.334528  |
| H | 1.307022  | 1.402890  | -0.530807 |
| C | 3.325756  | -0.515362 | -0.093858 |
| S | -2.020106 | 2.046839  | -0.308214 |
| O | -2.019769 | 1.746337  | -1.739149 |
| O | -3.138284 | 1.618702  | 0.528947  |
| C | -1.863086 | 3.810025  | -0.124918 |
| H | -2.777006 | 4.257769  | -0.517673 |
| H | -1.747988 | 4.033773  | 0.935936  |
| H | -0.992080 | 4.134256  | -0.693857 |
| C | 3.921660  | -0.289052 | 1.152850  |
| C | 5.191440  | 0.280242  | 1.227300  |
| C | 5.869907  | 0.634968  | 0.061336  |
| C | 5.282009  | 0.407230  | -1.182954 |
| C | 4.016320  | -0.169185 | -1.261766 |
| H | 3.413315  | -0.590304 | 2.063532  |
| H | 5.652563  | 0.440437  | 2.196462  |
| H | 6.856966  | 1.081998  | 0.122301  |
| H | 5.809111  | 0.676008  | -2.092687 |
| H | 3.552581  | -0.352650 | -2.226298 |

E\_R1Ph\_R2Ph\_XNMs\_conf4  
SCF Energy: -1447.85625708  
Num. Imaginary Frequencies: 0

|   |           |           |           |
|---|-----------|-----------|-----------|
| C | -0.896908 | -1.752058 | -0.260859 |
| N | -0.376895 | -2.876060 | -0.624990 |
| N | 1.031552  | -2.783977 | -0.592984 |
| C | -2.358953 | -1.597729 | -0.130114 |

|   |           |           |           |   |           |           |           |
|---|-----------|-----------|-----------|---|-----------|-----------|-----------|
| C | -2.996666 | -0.349966 | -0.170843 | C | -0.877015 | -1.780918 | -0.214134 |
| C | -3.139620 | -2.752912 | 0.042583  | N | -0.348207 | -2.911141 | -0.544867 |
| C | -4.382303 | -0.262111 | -0.042191 | N | 1.058793  | -2.804376 | -0.527402 |
| H | -2.441892 | 0.568293  | -0.327122 | C | -2.339854 | -1.632626 | -0.089162 |
| C | -4.520379 | -2.660577 | 0.170809  | C | -2.976306 | -0.383883 | -0.081472 |
| H | -2.645709 | -3.717754 | 0.083108  | C | -3.124212 | -2.792499 | 0.028622  |
| C | -5.147412 | -1.413215 | 0.129702  | C | -4.362578 | -0.297803 | 0.041108  |
| H | -4.858999 | 0.711975  | -0.082359 | H | -2.419996 | 0.539964  | -0.188374 |
| H | -5.108892 | -3.561766 | 0.309615  | C | -4.505408 | -2.702743 | 0.150287  |
| H | -6.225432 | -1.341082 | 0.232370  | H | -2.632530 | -3.759229 | 0.031070  |
| C | 0.147637  | 0.577064  | -0.716548 | C | -5.130731 | -1.453523 | 0.157616  |
| H | -0.707045 | 0.606808  | -1.399375 | H | -4.836370 | 0.678555  | 0.039642  |
| C | 0.173166  | -0.743011 | 0.101708  | H | -5.096405 | -3.607982 | 0.245397  |
| C | 1.378205  | -1.607733 | -0.193136 | H | -6.209435 | -1.384071 | 0.254658  |
| C | -0.449305 | 1.117479  | 1.582004  | C | 0.132447  | 0.533779  | -0.775147 |
| H | -1.544859 | 1.134394  | 1.606042  | H | -0.737524 | 0.520068  | -1.438213 |
| H | -0.071021 | 1.716959  | 2.409936  | C | 0.185437  | -0.747390 | 0.100186  |
| C | 0.087391  | -0.311006 | 1.599335  | C | 1.396880  | -1.611023 | -0.173532 |
| H | 1.084230  | -0.335209 | 2.043962  | C | -0.402208 | 1.174815  | 1.517745  |
| H | -0.556920 | -0.979518 | 2.173648  | H | -1.494520 | 1.217903  | 1.582521  |
| N | 0.087513  | 1.645335  | 0.304987  | H | 0.021182  | 1.789692  | 2.315364  |
| H | 1.058784  | 0.688787  | -1.310075 | C | 0.117879  | -0.260149 | 1.581707  |
| C | 2.789646  | -1.208784 | -0.057679 | H | 1.118458  | -0.281776 | 2.017773  |
| S | -0.587600 | 3.092608  | -0.185664 | H | -0.529148 | -0.898343 | 2.186553  |
| O | -1.836577 | 2.858631  | -0.918936 | N | 0.088184  | 1.646625  | 0.206452  |
| O | -0.637113 | 3.939868  | 1.003276  | H | 1.021099  | 0.640744  | -1.399454 |
| C | 0.624536  | 3.713985  | -1.324583 | C | 2.805323  | -1.196742 | -0.057597 |
| H | 0.267700  | 4.695482  | -1.640179 | S | -0.596290 | 3.049518  | -0.387391 |
| H | 1.577574  | 3.790071  | -0.802571 | O | -0.081372 | 3.205673  | -1.745973 |
| H | 0.684226  | 3.042393  | -2.181398 | O | -2.050051 | 3.032625  | -0.195821 |
| C | 3.796892  | -2.151138 | -0.321544 | C | 0.095832  | 4.300340  | 0.665344  |
| C | 5.136129  | -1.802668 | -0.200260 | H | -0.288315 | 5.251583  | 0.294064  |
| C | 5.493428  | -0.508126 | 0.185925  | H | -0.240878 | 4.131914  | 1.688144  |
| C | 4.501383  | 0.433571  | 0.448632  | H | 1.180791  | 4.254316  | 0.582847  |
| C | 3.155495  | 0.089230  | 0.328347  | C | 3.161209  | 0.123024  | 0.256141  |
| H | 3.512234  | -3.154352 | -0.619804 | C | 4.504369  | 0.483019  | 0.359030  |
| H | 5.904739  | -2.540664 | -0.405803 | C | 5.503357  | -0.465319 | 0.152347  |
| H | 6.540151  | -0.237617 | 0.281271  | C | 5.155774  | -1.782111 | -0.160594 |
| H | 4.770865  | 1.440888  | 0.749135  | C | 3.819231  | -2.145951 | -0.265294 |
| H | 2.402031  | 0.843331  | 0.538700  | H | 2.401188  | 0.882344  | 0.418195  |
|   |           |           |           | H | 4.766510  | 1.508123  | 0.599941  |
|   |           |           |           | H | 6.548017  | -0.182471 | 0.233644  |
|   |           |           |           | H | 5.929868  | -2.525280 | -0.322310 |
|   |           |           |           | H | 3.542083  | -3.166262 | -0.507343 |

E\_R1Ph\_R2Ph\_XNMs  
SCF Energy: -1447.85580829  
Num. Imaginary Frequencies: 0

Set 3 corresponds to the cartesian coordinates for alphyphenone derivatives methylated at alpha position.

**R1Ph\_R2Me\_XO\_Me:**

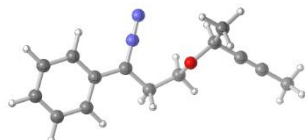

| FILE                      | SCF E       | SCF+ZPVE    | H           | TS         | G           |
|---------------------------|-------------|-------------|-------------|------------|-------------|
| A_R1Ph_R2Me_XO_Me_conf3   | -456484.631 | -456313.369 | -456301.763 | 42.3970445 | -456344.16  |
| A_R1Ph_R2Me_XO_Me_conf1   | -456484.508 | -456313.104 | -456301.682 | 40.9293001 | -456342.611 |
| A_R1Ph_R2Me_XO_Me_conf2   | -456483.42  | -456311.999 | -456300.531 | 41.8749567 | -456342.406 |
| A_R1Ph_R2Me_XO_Me         | -456481.032 | -456309.894 | -456298.152 | 42.7528424 | -456340.905 |
| B_R1Ph_R2Me_XO_Mee3_conf1 | -456533.257 | -456358.464 | -456348.837 | 35.6255907 | -456384.462 |
| B_R1Ph_R2Me_XO_Mee3_conf2 | -456533.257 | -456358.464 | -456348.837 | 35.6249632 | -456384.462 |
| B_R1Ph_R2Me_XO_Meec       | -456533.257 | -456358.463 | -456348.836 | 35.6237082 | -456384.46  |
| B_R1Ph_R2Me_XO_Meax_conf1 | -456532.454 | -456357.67  | -456348.038 | 35.3764695 | -456383.414 |
| B_R1Ph_R2Me_XO_Meax_conf3 | -456532.454 | -456357.669 | -456348.037 | 35.3764695 | -456383.414 |
| B_R1Ph_R2Me_XO_Meax       | -456532.454 | -456357.669 | -456348.038 | 35.3745869 | -456383.413 |
| B_R1Ph_R2Me_XO_Meax_conf2 | -456532.454 | -456357.668 | -456348.037 | 35.3739594 | -456383.411 |
| B_R1Ph_R2Me_XO_Meax_conf4 | -456530.483 | -456355.975 | -456346.211 | 35.8558866 | -456382.066 |
| B_R1Ph_R2Me_XO_Meax_conf6 | -456530.483 | -456355.973 | -456346.209 | 35.8571417 | -456382.066 |
| B_R1Ph_R2Me_XO_Mee3_conf3 | -456528.601 | -456354.219 | -456344.392 | 36.1865841 | -456380.579 |
| B_R1Ph_R2Me_XO_Meax_conf5 | -456528.42  | -456353.898 | -456344.115 | 36.1476785 | -456380.263 |
| B_R1Ph_R2Me_XO_Mee3_conf5 | -456527.573 | -456353.161 | -456343.263 | 36.8787269 | -456380.142 |
| B_R1Ph_R2Me_XO_Mee3_conf4 | -456527.587 | -456353.133 | -456343.262 | 36.6641187 | -456379.926 |
| C_R1Ph_R2Me_XO_Mee3_conf1 | -456542.788 | -456367.939 | -456358.355 | 35.0991103 | -456393.454 |
| C_R1Ph_R2Me_XO_Meax_conf1 | -456542.227 | -456367.385 | -456357.798 | 35.0093765 | -456392.807 |
| C_R1Ph_R2Me_XO_Mee3_conf2 | -456541.954 | -456367.042 | -456357.459 | 35.2541051 | -456392.714 |
| C_R1Ph_R2Me_XO_Mee3_conf4 | -456537.177 | -456362.78  | -456352.99  | 35.779958  | -456388.77  |
| C_R1Ph_R2Me_XO_Mee3_conf3 | -456537.177 | -456362.78  | -456352.99  | 35.778703  | -456388.769 |
| C_R1Ph_R2Me_XO_Meec       | -456537.071 | -456362.586 | -456352.862 | 35.9023223 | -456388.764 |
| C_R1Ph_R2Me_XO_Meax_conf2 | -456533.104 | -456358.239 | -456348.655 | 35.3971773 | -456384.053 |
| C_R1Ph_R2Me_XO_Meax       | -456533.104 | -456358.238 | -456348.655 | 35.3940397 | -456384.049 |
| D_R1Ph_R2Me_XO_Mee3_conf1 | -456560.446 | -456385.132 | -456375.469 | 35.681439  | -456411.15  |
| D_R1Ph_R2Me_XO_Mee3_conf2 | -456560.446 | -456385.132 | -456375.469 | 35.680184  | -456411.149 |
| D_R1Ph_R2Me_XO_Meax_conf3 | -456559.608 | -456384.341 | -456374.62  | 35.8791045 | -456410.499 |
| D_R1Ph_R2Me_XO_Mee3_conf4 | -456559.608 | -456384.341 | -456374.62  | 35.8791045 | -456410.499 |
| D_R1Ph_R2Me_XO_Meax       | -456559.608 | -456384.34  | -456374.62  | 35.877222  | -456410.497 |
| D_R1Ph_R2Me_XO_Meec       | -456559.162 | -456383.866 | -456374.166 | 35.9242852 | -456410.09  |
| D_R1Ph_R2Me_XO_Meax_conf2 | -456559.162 | -456383.864 | -456374.164 | 35.9249127 | -456410.089 |
| D_R1Ph_R2Me_XO_Mee3_conf5 | -456558.375 | -456383.244 | -456373.449 | 36.1734064 | -456409.623 |
| D_R1Ph_R2Me_XO_Meax_conf5 | -456558.375 | -456383.243 | -456373.449 | 36.1734064 | -456409.622 |

|                           |             |             |             |            |             |
|---------------------------|-------------|-------------|-------------|------------|-------------|
| D_R1Ph_R2Me_XO_Meax_conf4 | -456558.375 | -456383.243 | -456373.448 | 36.1727789 | -456409.621 |
| D_R1Ph_R2Me_XO_Meax_conf1 | -456558.375 | -456383.24  | -456373.446 | 36.1727789 | -456409.618 |
| D_R1Ph_R2Me_XO_Mee3_conf3 | -456558.375 | -456383.24  | -456373.446 | 36.1727789 | -456409.618 |
| E_R1Ph_R2Me_XO_Meax_conf2 | -456543.584 | -456368.892 | -456359.087 | 35.9638183 | -456395.051 |
| E_R1Ph_R2Me_XO_Meax_conf1 | -456543.584 | -456368.891 | -456359.087 | 35.9613082 | -456395.048 |
| E_R1Ph_R2Me_XO_Meec       | -456542.95  | -456368.351 | -456358.492 | 36.2361573 | -456394.728 |
| E_R1Ph_R2Me_XO_Mee3_conf1 | -456542.95  | -456368.351 | -456358.492 | 36.2317648 | -456394.724 |
| E_R1Ph_R2Me_XO_Mee3_conf4 | -456540.88  | -456366.524 | -456356.562 | 36.6628637 | -456393.225 |
| E_R1Ph_R2Me_XO_Mee3_conf2 | -456540.934 | -456365.949 | -456356.306 | 35.3990598 | -456391.705 |
| E_R1Ph_R2Me_XO_Meax_conf3 | -456539.174 | -456364.61  | -456354.77  | 36.2374124 | -456391.008 |
| E_R1Ph_R2Me_XO_Meax       | -456539.308 | -456364.546 | -456354.78  | 36.113793  | -456390.894 |
| E_R1Ph_R2Me_XO_Mee3_conf3 | -456538.801 | -456364.044 | -456354.289 | 35.8257662 | -456390.115 |
| TS_A_B_R1Ph_R2Me_XO_Meax  | -456461.229 | -456289.368 | -456279.09  | 36.6785515 | -456315.768 |
| TS_A_B_R1Ph_R2Me_XO_Meec  | -456463.341 | -456291.734 | -456281.366 | 37.0839225 | -456318.449 |
| TS_B_C_R1Ph_R2Me_XO_Meax  | -456495.169 | -456321.412 | -456312.07  | 34.208047  | -456346.278 |
| TS_B_C_R1Ph_R2Me_XO_Meec  | -456498.643 | -456324.847 | -456315.555 | 34.1245882 | -456349.68  |
| TS_B_D_R1Ph_R2Me_XO_Meax  | -456500.264 | -456327.12  | -456317.563 | 35.2685379 | -456352.831 |
| TS_B_D_R1Ph_R2Me_XO_Meec  | -456500.504 | -456327.179 | -456317.764 | 34.7878657 | -456352.552 |
| TS_B_E_R1Ph_R2Me_XO_Meax  | -456500.794 | -456327.201 | -456317.707 | 35.3112085 | -456353.018 |
| TS_B_E_R1Ph_R2Me_XO_Meec  | -456503.631 | -456329.948 | -456320.492 | 34.9961988 | -456355.489 |

### A\_R1Ph\_R2Me\_XO\_Me\_conf3

SCF Energy: -727.454659539

Num. Imaginary Frequencies: 0

|   |           |           |           |
|---|-----------|-----------|-----------|
| C | 1.160760  | -0.006787 | 0.333108  |
| N | 0.722987  | 1.174513  | 0.642876  |
| N | 0.349349  | 2.217600  | 0.912680  |
| C | 2.596346  | -0.162352 | 0.092062  |
| C | 3.492497  | 0.918518  | 0.183924  |
| C | 3.108069  | -1.427340 | -0.242948 |
| C | 4.850476  | 0.735362  | -0.050992 |
| H | 3.127190  | 1.909125  | 0.440329  |
| C | 4.470521  | -1.601668 | -0.477042 |
| H | 2.442752  | -2.280707 | -0.322489 |
| C | 5.351023  | -0.525319 | -0.383194 |
| H | 5.522374  | 1.584690  | 0.025790  |
| H | 4.842650  | -2.588530 | -0.734807 |
| H | 6.411346  | -0.664502 | -0.566045 |
| C | -2.856116 | 0.910267  | -0.124524 |
| H | -2.714204 | 1.402816  | 0.851001  |
| C | -4.018857 | 0.003625  | -0.022075 |
| C | -4.974638 | -0.734384 | 0.056369  |
| C | 0.165554  | -1.141070 | 0.238777  |
| H | 0.452410  | -1.936014 | 0.938077  |
| H | 0.198093  | -1.569517 | -0.770867 |
| C | -1.260436 | -0.722643 | 0.545687  |
| H | -1.917148 | -1.601072 | 0.545449  |
| H | -1.323013 | -0.253754 | 1.540574  |
| O | -1.667936 | 0.202134  | -0.447241 |
| C | -3.052246 | 1.968555  | -1.201007 |
| H | -3.181941 | 1.489715  | -2.174469 |
| H | -3.935904 | 2.570956  | -0.980699 |

|   |           |           |           |
|---|-----------|-----------|-----------|
| H | -2.173708 | 2.617362  | -1.233014 |
| C | -6.133000 | -1.625340 | 0.151255  |
| H | -6.899368 | -1.190080 | 0.797137  |
| H | -6.572096 | -1.797518 | -0.834206 |
| H | -5.842021 | -2.591376 | 0.570875  |

### B\_R1Ph\_R2Me\_XO\_Meax\_conf1

SCF Energy: -727.530869896

Num. Imaginary Frequencies: 0

|   |           |           |           |
|---|-----------|-----------|-----------|
| C | 0.275643  | -0.084773 | -0.845714 |
| N | 0.582123  | -1.279869 | -1.672798 |
| N | 1.537056  | -1.911325 | -1.173414 |
| C | -1.172441 | -0.218351 | -0.370781 |
| C | -1.483165 | -1.251827 | 0.522027  |
| C | -2.195616 | 0.623440  | -0.807170 |
| C | -2.784167 | -1.431995 | 0.979007  |
| H | -0.694116 | -1.916367 | 0.866349  |
| C | -3.502197 | 0.448624  | -0.343902 |
| H | -1.994349 | 1.428920  | -1.504748 |
| C | -3.800474 | -0.575405 | 0.550110  |
| H | -3.005355 | -2.238085 | 1.671393  |
| H | -4.284398 | 1.117666  | -0.688285 |
| H | -4.815751 | -0.709101 | 0.909569  |
| C | 1.516597  | 1.009506  | 1.157175  |
| H | 2.472712  | 0.891493  | 1.674922  |
| C | 1.298276  | -0.162057 | 0.247155  |
| C | 2.035430  | -1.256779 | 0.012779  |
| C | 0.601050  | 1.199208  | -1.631182 |
| H | -0.134762 | 1.393370  | -2.415297 |

|   |           |           |           |
|---|-----------|-----------|-----------|
| H | 1.574201  | 1.063242  | -2.114281 |
| C | 0.693667  | 2.374130  | -0.651479 |
| H | 0.984874  | 3.281121  | -1.184798 |
| H | -0.276896 | 2.558256  | -0.171600 |
| O | 1.701384  | 2.168728  | 0.329039  |
| C | 0.414970  | 1.220387  | 2.193174  |
| H | 0.658434  | 2.091974  | 2.805706  |
| H | -0.563284 | 1.373023  | 1.730732  |
| H | 0.344563  | 0.341453  | 2.840622  |
| C | 3.220851  | -1.842158 | 0.698255  |
| H | 4.058574  | -1.932899 | 0.001156  |
| H | 3.530379  | -1.222916 | 1.541838  |
| H | 2.989309  | -2.844323 | 1.071180  |

B\_R1Ph\_R2Me\_XO\_Mee3\_conf1

SCF Energy: -727.532149524

Num. Imaginary Frequencies: 0

|   |           |           |           |
|---|-----------|-----------|-----------|
| C | 0.020920  | -0.180253 | 0.794330  |
| N | 0.134461  | -1.472040 | 1.510709  |
| N | 1.117405  | -2.107990 | 1.078980  |
| C | -1.357273 | -0.145637 | 0.138872  |
| C | -2.499686 | 0.032671  | 0.927865  |
| C | -1.514825 | -0.360182 | -1.233803 |
| C | -3.768363 | 0.021135  | 0.353279  |
| H | -2.405863 | 0.164982  | 2.001174  |
| C | -2.785236 | -0.368904 | -1.810830 |
| H | -0.644813 | -0.528210 | -1.861402 |
| C | -3.915358 | -0.173110 | -1.020579 |
| H | -4.642895 | 0.159862  | 0.980993  |
| H | -2.886971 | -0.530572 | -2.879304 |
| H | -4.903757 | -0.177609 | -1.468841 |
| C | 1.526887  | 1.077338  | -0.866202 |
| H | 0.675495  | 1.359198  | -1.507536 |
| C | 1.188889  | -0.200683 | -0.146587 |
| C | 1.821083  | -1.368470 | 0.054462  |
| C | 0.540408  | 2.252241  | 0.957348  |
| H | -0.336816 | 2.508266  | 0.343060  |
| H | 0.758255  | 3.091769  | 1.620107  |
| C | 0.266883  | 0.988675  | 1.772547  |
| H | 1.145043  | 0.754835  | 2.383671  |
| H | -0.584801 | 1.138151  | 2.439983  |
| O | 1.680596  | 2.098115  | 0.127640  |
| C | 2.797597  | 1.061416  | -1.689606 |
| H | 2.714196  | 0.346442  | -2.511893 |
| H | 2.962485  | 2.055509  | -2.110775 |
| H | 3.656879  | 0.797630  | -1.067517 |
| C | 3.045907  | -2.015847 | -0.500242 |
| H | 3.372768  | -1.549121 | -1.427492 |
| H | 3.865671  | -1.965726 | 0.223462  |
| H | 2.840292  | -3.072463 | -0.691760 |

C\_R1Ph\_R2Me\_XO\_Meax\_conf1

SCF Energy: -727.546444968

Num. Imaginary Frequencies: 0

|   |           |           |           |
|---|-----------|-----------|-----------|
| C | -1.220987 | 0.040217  | -1.228628 |
| N | -1.794582 | 1.082076  | -1.713362 |
| N | -1.529210 | 2.188476  | -0.848702 |
| C | 0.983283  | 0.029290  | -0.017067 |
| C | 1.513939  | -1.239518 | 0.251948  |

|   |           |           |           |
|---|-----------|-----------|-----------|
| C | 1.852396  | 1.033008  | -0.465422 |
| C | 2.878885  | -1.483406 | 0.104854  |
| H | 0.858679  | -2.041683 | 0.571921  |
| C | 3.216051  | 0.786847  | -0.615705 |
| H | 1.465872  | 2.019172  | -0.708827 |
| C | 3.736810  | -0.472542 | -0.325195 |
| H | 3.269242  | -2.472190 | 0.324888  |
| H | 3.867981  | 1.582520  | -0.962064 |
| H | 4.798701  | -0.665964 | -0.438471 |
| C | -1.321035 | -0.515928 | 1.134885  |
| H | -2.334917 | -0.082804 | 1.151778  |
| C | -0.514026 | 0.318131  | 0.073933  |
| C | -0.839683 | 1.790472  | 0.162605  |
| C | -1.424461 | -1.362779 | -1.667058 |
| H | -0.462862 | -1.851993 | -1.854936 |
| H | -2.039730 | -1.409342 | -2.567991 |
| C | -2.128362 | -2.064484 | -0.487105 |
| H | -3.149997 | -1.672181 | -0.381478 |
| H | -2.175095 | -3.142439 | -0.646944 |
| O | -1.414842 | -1.870402 | 0.722903  |
| C | -0.738262 | -0.497770 | 2.535360  |
| H | -1.394525 | -1.062649 | 3.201121  |
| H | 0.255625  | -0.948131 | 2.556290  |
| H | -0.663345 | 0.525134  | 2.909668  |
| C | -0.439755 | 2.713463  | 1.266029  |
| H | -1.131584 | 2.615685  | 2.109486  |
| H | 0.564785  | 2.479497  | 1.629180  |
| H | -0.472313 | 3.746718  | 0.916997  |

C\_R1Ph\_R2Me\_XO\_Mee3\_conf1

SCF Energy: -727.547338372

Num. Imaginary Frequencies: 0

|   |           |           |           |
|---|-----------|-----------|-----------|
| C | -1.077819 | 0.011532  | 1.196537  |
| N | -1.635905 | 1.060542  | 1.683749  |
| N | -1.391650 | 2.158175  | 0.794767  |
| C | 1.085463  | -0.002017 | -0.097639 |
| C | 1.697364  | -1.000660 | -0.858136 |
| C | 1.877799  | 0.782675  | 0.751185  |
| C | 3.078283  | -1.196682 | -0.782866 |
| H | 1.106152  | -1.646483 | -1.497279 |
| C | 3.253236  | 0.585926  | 0.827705  |
| H | 1.410535  | 1.557853  | 1.355867  |
| C | 3.859973  | -0.406028 | 0.055404  |
| H | 3.538726  | -1.976406 | -1.381441 |
| H | 3.849942  | 1.206342  | 1.488795  |
| H | 4.932554  | -0.562075 | 0.110843  |
| C | -1.207957 | -0.602468 | -1.157160 |
| H | -0.654122 | -0.614891 | -2.100644 |
| C | -0.416215 | 0.270146  | -0.129130 |
| C | -0.726445 | 1.742227  | -0.225610 |
| C | -1.859614 | -2.186142 | 0.525043  |
| H | -1.777752 | -3.257916 | 0.709423  |
| H | -2.922628 | -1.927501 | 0.443474  |
| C | -1.210809 | -1.387330 | 1.675499  |
| H | -1.820744 | -1.442401 | 2.579665  |
| H | -0.217966 | -1.803299 | 1.880011  |
| O | -1.193783 | -1.952165 | -0.707526 |
| C | -2.619890 | -0.088484 | -1.424107 |
| H | -3.177111 | -0.854503 | -1.969201 |
| H | -3.163032 | 0.156789  | -0.506695 |
| H | -2.583654 | 0.811257  | -2.042980 |

|   |           |          |           |
|---|-----------|----------|-----------|
| C | -0.282539 | 2.627637 | -1.337881 |
| H | -0.675081 | 3.635580 | -1.200250 |
| H | 0.811550  | 2.666153 | -1.368482 |
| H | -0.619196 | 2.235793 | -2.303574 |

D\_R1Ph\_R2Me\_XO\_Meax\_conf3

SCF Energy: -727.574143653

Num. Imaginary Frequencies: 0

|   |           |           |           |
|---|-----------|-----------|-----------|
| C | -0.533040 | -0.416772 | -0.163212 |
| N | 0.508694  | 0.462959  | -0.178100 |
| N | 0.076373  | 1.744173  | -0.267706 |
| C | 1.895707  | 0.192321  | -0.061480 |
| C | 2.704683  | 1.075037  | 0.657693  |
| C | 2.444057  | -0.939374 | -0.666934 |
| C | 4.066850  | 0.813604  | 0.774391  |
| H | 2.257977  | 1.951276  | 1.113368  |
| C | 3.806523  | -1.199094 | -0.528329 |
| H | 1.819577  | -1.598072 | -1.260008 |
| C | 4.621853  | -0.326058 | 0.189970  |
| H | 4.695317  | 1.500046  | 1.332604  |
| H | 4.230859  | -2.079620 | -0.999720 |
| H | 5.683142  | -0.528405 | 0.289251  |
| C | -3.050727 | -0.293067 | -0.255987 |
| H | -3.585893 | -0.014225 | -1.171280 |
| C | -1.684012 | 0.330786  | -0.254997 |
| C | -1.249043 | 1.678995  | -0.315264 |
| C | -0.520849 | -1.900498 | 0.010580  |
| H | 0.230911  | -2.216615 | 0.741787  |
| H | -0.306324 | -2.411078 | -0.934846 |
| C | -1.924809 | -2.282440 | 0.491786  |
| H | -2.069597 | -3.363050 | 0.446662  |
| H | -2.061779 | -1.956897 | 1.531707  |
| O | -2.926157 | -1.718044 | -0.343849 |
| C | -3.896778 | 0.115484  | 0.947575  |
| H | -4.874087 | -0.371537 | 0.899824  |
| H | -3.405644 | -0.156711 | 1.886110  |
| H | -4.047649 | 1.199058  | 0.948726  |
| C | -2.077198 | 2.920451  | -0.424942 |
| H | -2.869355 | 2.796128  | -1.169029 |
| H | -2.553308 | 3.164046  | 0.530048  |
| H | -1.449655 | 3.763828  | -0.718863 |

D\_R1Ph\_R2Me\_XO\_Mee3\_conf1

SCF Energy: -727.575478717

Num. Imaginary Frequencies: 0

|   |           |           |           |
|---|-----------|-----------|-----------|
| C | -0.526265 | -0.419838 | -0.043863 |
| N | 0.505903  | 0.464842  | 0.058020  |
| N | 0.062979  | 1.745034  | 0.077629  |
| C | 1.898537  | 0.198000  | 0.077137  |
| C | 2.770912  | 1.070743  | -0.577205 |
| C | 2.388392  | -0.921866 | 0.750786  |
| C | 4.138265  | 0.810606  | -0.560253 |
| H | 2.368828  | 1.937887  | -1.088383 |
| C | 3.757990  | -1.180784 | 0.745664  |
| H | 1.710957  | -1.571966 | 1.293088  |
| C | 4.636709  | -0.317774 | 0.092937  |
| H | 4.816021  | 1.489260  | -1.068075 |
| H | 4.136626  | -2.052361 | 1.269633  |
| H | 5.702805  | -0.519180 | 0.097328  |

|   |           |           |           |
|---|-----------|-----------|-----------|
| C | -3.036723 | -0.319995 | -0.221456 |
| H | -3.429130 | -0.123186 | -1.233850 |
| C | -1.684620 | 0.322650  | -0.072410 |
| C | -1.261029 | 1.674623  | 0.001595  |
| C | -1.841959 | -2.296509 | -0.815766 |
| H | -1.905739 | -1.959944 | -1.860943 |
| H | -1.980670 | -3.378562 | -0.786960 |
| C | -0.484828 | -1.903634 | -0.220299 |
| H | -0.345658 | -2.418368 | 0.736613  |
| H | 0.329301  | -2.207716 | -0.887032 |
| O | -2.905683 | -1.734218 | -0.062941 |
| C | -4.050554 | 0.146826  | 0.808705  |
| H | -4.258364 | 1.212479  | 0.685008  |
| H | -4.985757 | -0.405535 | 0.686305  |
| H | -3.664021 | -0.022120 | 1.817609  |
| C | -2.091354 | 2.919980  | 0.010381  |
| H | -2.614800 | 3.040773  | 0.963716  |
| H | -1.452962 | 3.791891  | -0.143481 |
| H | -2.844984 | 2.893082  | -0.782310 |

E\_R1Ph\_R2Me\_XO\_Meax\_conf2

SCF Energy: -727.548606778

Num. Imaginary Frequencies: 0

|   |           |           |           |
|---|-----------|-----------|-----------|
| C | -0.050044 | -0.916416 | -0.023138 |
| N | 0.247347  | -2.164732 | 0.124106  |
| N | 1.653054  | -2.335207 | 0.039710  |
| C | -1.456490 | -0.469499 | -0.057017 |
| C | -1.798894 | 0.889062  | -0.082928 |
| C | -2.480893 | -1.430193 | -0.074583 |
| C | -3.138094 | 1.277301  | -0.119655 |
| H | -1.022994 | 1.648025  | -0.056483 |
| C | -3.813670 | -1.038788 | -0.110873 |
| H | -2.215341 | -2.481610 | -0.061695 |
| C | -4.147717 | 0.317825  | -0.134163 |
| H | -3.388689 | 2.333171  | -0.135402 |
| H | -4.595257 | -1.791756 | -0.124152 |
| H | -5.189162 | 0.622153  | -0.164745 |
| C | 1.495228  | 0.997464  | 0.896484  |
| H | 2.588459  | 1.016768  | 1.023611  |
| C | 1.193588  | -0.076079 | -0.212872 |
| C | 2.204076  | -1.190766 | -0.164557 |
| C | 1.207322  | 0.774114  | -1.516087 |
| H | 0.221958  | 0.750254  | -1.986072 |
| H | 1.934387  | 0.403442  | -2.241742 |
| C | 1.548957  | 2.191640  | -1.021839 |
| H | 2.633137  | 2.367098  | -1.057682 |
| H | 1.038254  | 2.981005  | -1.574946 |
| O | 1.102083  | 2.231737  | 0.325766  |
| C | 0.835514  | 0.784210  | 2.240723  |
| H | 1.115300  | -0.196191 | 2.638187  |
| H | 1.170774  | 1.550168  | 2.943414  |
| H | -0.252774 | 0.832176  | 2.159488  |
| C | 3.678968  | -1.020566 | -0.304033 |
| H | 4.150310  | -1.993812 | -0.444968 |
| H | 3.921090  | -0.375325 | -1.154168 |
| H | 4.103972  | -0.555740 | 0.591748  |

E\_R1Ph\_R2Me\_XO\_Mee3\_conf1

SCF Energy: -727.547597349

Num. Imaginary Frequencies: 0





|   |           |           |           |   |           |           |           |
|---|-----------|-----------|-----------|---|-----------|-----------|-----------|
| C | -3.903590 | 0.676419  | -0.730711 | N | -0.020965 | -2.120817 | -0.188692 |
| H | -2.253674 | 2.026531  | -1.061606 | N | -1.422536 | -2.318704 | -0.288057 |
| C | -4.317843 | -0.513152 | -0.131539 | C | 1.627687  | -0.357307 | -0.116557 |
| H | -3.728991 | -2.191072 | 1.085405  | C | 1.937019  | 1.004884  | -0.230465 |
| H | -4.607695 | 1.274279  | -1.300468 | C | 2.673297  | -1.271930 | 0.092395  |
| H | -5.346298 | -0.844618 | -0.232991 | C | 3.257717  | 1.442989  | -0.136629 |
| C | 1.314559  | -1.232101 | 0.526124  | H | 1.156583  | 1.740031  | -0.393726 |
| H | 0.434913  | -1.884766 | 0.424062  | C | 3.988114  | -0.833283 | 0.184301  |
| C | 0.980067  | 0.108212  | -0.180411 | H | 2.436403  | -2.326391 | 0.182655  |
| C | 1.967476  | 1.205694  | 0.112559  | C | 4.286032  | 0.527248  | 0.070265  |
| C | 2.042051  | -1.512408 | -1.638017 | H | 3.478107  | 2.501644  | -0.226749 |
| H | 1.616473  | -2.417625 | -2.084199 | H | 4.784483  | -1.552342 | 0.347447  |
| H | 2.971553  | -1.265708 | -2.156186 | H | 5.313623  | 0.868702  | 0.143477  |
| C | 1.015136  | -0.354255 | -1.655535 | C | -1.249894 | 0.832984  | 0.997681  |
| H | 1.294226  | 0.452842  | -2.336257 | H | -0.296306 | 1.333280  | 1.225111  |
| H | 0.022476  | -0.714425 | -1.940089 | C | -1.020200 | -0.039232 | -0.287296 |
| O | 2.366614  | -1.752054 | -0.267478 | C | -2.004550 | -1.172592 | -0.362668 |
| C | 1.735252  | -1.145381 | 1.976426  | C | -1.730455 | 2.253831  | -0.695515 |
| H | 0.936016  | -0.693430 | 2.571771  | H | -0.928428 | 2.991044  | -0.551195 |
| H | 1.935382  | -2.144998 | 2.368301  | H | -2.565591 | 2.733879  | -1.206265 |
| H | 2.637243  | -0.539005 | 2.089623  | C | -1.200391 | 0.999748  | -1.427456 |
| C | 3.433006  | 1.143734  | -0.153281 | H | -1.921891 | 0.636399  | -2.161423 |
| H | 3.611857  | 1.023132  | -1.227795 | H | -0.266540 | 1.192357  | -1.957859 |
| H | 3.911518  | 2.063970  | 0.183602  | O | -2.190455 | 1.797441  | 0.569779  |
| H | 3.885153  | 0.280885  | 0.342582  | C | -1.737172 | 0.107402  | 2.232804  |

E\_R1Ph\_R2Me\_XO\_Meec

SCF Energy: -727.547597429

Num. Imaginary Frequencies: 0

|   |          |           |           |
|---|----------|-----------|-----------|
| C | 0.242505 | -0.856029 | -0.214549 |
|---|----------|-----------|-----------|

|   |           |           |           |
|---|-----------|-----------|-----------|
| H | -2.730496 | -0.320417 | 2.080819  |
| H | -1.042508 | -0.699115 | 2.486520  |
| H | -1.781443 | 0.801236  | 3.074970  |
| C | -3.478244 | -1.018805 | -0.526795 |
| H | -3.862671 | -0.226873 | 0.121496  |
| H | -3.714738 | -0.733589 | -1.557777 |
| H | -3.979239 | -1.962178 | -0.305587 |

### R1Ph\_R2Ph\_XNH\_Me:

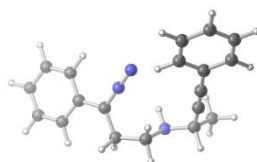

| FILE                       | SCF E       | SCF+ZPVE    | H           | TS         | G           |
|----------------------------|-------------|-------------|-------------|------------|-------------|
| A_R1Ph_R2Ph_XNH_Me_conf2   | -564299.448 | -564086.023 | -564072.713 | 46.5229188 | -564119.236 |
| A_R1Ph_R2Ph_XNH_Me_conf10  | -564299.372 | -564085.85  | -564072.625 | 46.3421961 | -564118.968 |
| A_R1Ph_R2Ph_XNH_Me_conf3   | -564300.952 | -564087.359 | -564074.211 | 44.7552248 | -564118.966 |
| A_R1Ph_R2Ph_XNH_Me_conf8   | -564299.024 | -564085.468 | -564072.176 | 46.4645604 | -564118.64  |
| A_R1Ph_R2Ph_XNH_Me_conf5   | -564297.209 | -564083.953 | -564070.514 | 47.636748  | -564118.151 |
| A_R1Ph_R2Ph_XNH_Me_conf4   | -564297.713 | -564084.529 | -564071.093 | 46.8416936 | -564117.935 |
| A_R1Ph_R2Ph_XNH_Me_conf6   | -564297.2   | -564083.943 | -564070.508 | 47.4202572 | -564117.928 |
| A_R1Ph_R2Ph_XNH_Me_conf1   | -564297.65  | -564084.361 | -564071.002 | 46.8837367 | -564117.886 |
| A_R1Ph_R2Ph_XNH_Me_conf7   | -564297.814 | -564084.436 | -564071.111 | 46.500956  | -564117.612 |
| A_R1Ph_R2Ph_XNH_Me         | -564297.62  | -564084.321 | -564070.92  | 46.5737471 | -564117.494 |
| A_R1Ph_R2Ph_XNH_Me_conf9   | -564298.108 | -564084.645 | -564071.459 | 45.3538688 | -564116.813 |
| B_R1Ph_R2Ph_XNH_Meax_conf3 | -564349.16  | -564132.496 | -564120.96  | 40.1461684 | -564161.107 |

|                            |             |             |             |            |             |
|----------------------------|-------------|-------------|-------------|------------|-------------|
| B_R1Ph_R2Ph_XNH_Meax       | -564349.16  | -564132.496 | -564120.96  | 40.1442858 | -564161.105 |
| B_R1Ph_R2Ph_XNH_Meax_conf4 | -564349.16  | -564132.496 | -564120.96  | 40.1436583 | -564161.104 |
| B_R1Ph_R2Ph_XNH_Meax_conf2 | -564349.16  | -564132.495 | -564120.96  | 40.1430308 | -564161.103 |
| B_R1Ph_R2Ph_XNH_Meeq_conf6 | -564347.493 | -564131.104 | -564119.473 | 40.8094458 | -564160.283 |
| B_R1Ph_R2Ph_XNH_Meeq_conf1 | -564347.493 | -564131.104 | -564119.473 | 40.8069357 | -564160.28  |
| B_R1Ph_R2Ph_XNH_Meeq       | -564347.355 | -564130.88  | -564119.288 | 40.6908465 | -564159.979 |
| B_R1Ph_R2Ph_XNH_Meeq_conf5 | -564347.355 | -564130.88  | -564119.288 | 40.6895915 | -564159.977 |
| B_R1Ph_R2Ph_XNH_Meeq_conf2 | -564347.355 | -564130.879 | -564119.287 | 40.690219  | -564159.977 |
| B_R1Ph_R2Ph_XNH_Meax_conf1 | -564347.325 | -564130.815 | -564119.215 | 40.621193  | -564159.836 |
| B_R1Ph_R2Ph_XNH_Meeq_conf3 | -564344.746 | -564128.282 | -564116.613 | 40.9813834 | -564157.594 |
| B_R1Ph_R2Ph_XNH_Meax_conf5 | -564344.628 | -564128.365 | -564116.676 | 40.8307811 | -564157.506 |
| B_R1Ph_R2Ph_XNH_Meeq_conf4 | -564343.017 | -564127.006 | -564115.23  | 41.0635871 | -564156.294 |
| B_R1Ph_R2Ph_XNH_Meax_conf7 | -564343.521 | -564127.087 | -564115.434 | 40.7134368 | -564156.147 |
| B_R1Ph_R2Ph_XNH_Meax_conf6 | -564343.521 | -564127.085 | -564115.433 | 40.7071617 | -564156.14  |
| B_R1Ph_R2Ph_XNH_Meeq_conf7 | -564339.608 | -564123.446 | -564111.697 | 41.0717447 | -564152.769 |
| C_R1Ph_R2Ph_XNH_Meeq_conf2 | -564358.724 | -564141.991 | -564130.458 | 39.9296776 | -564170.388 |
| C_R1Ph_R2Ph_XNH_Meeq_conf4 | -564358.724 | -564141.989 | -564130.456 | 39.9271676 | -564170.383 |
| C_R1Ph_R2Ph_XNH_Meeq_conf3 | -564358.724 | -564141.989 | -564130.457 | 39.925285  | -564170.382 |
| C_R1Ph_R2Ph_XNH_Meax_conf1 | -564355.225 | -564138.624 | -564127.007 | 40.0244315 | -564167.031 |
| C_R1Ph_R2Ph_XNH_Meeq_conf6 | -564352.835 | -564136.35  | -564124.668 | 40.6130353 | -564165.281 |
| C_R1Ph_R2Ph_XNH_Meeq       | -564351.986 | -564135.705 | -564123.997 | 40.5101238 | -564164.507 |
| C_R1Ph_R2Ph_XNH_Meeq_conf1 | -564351.986 | -564135.703 | -564123.995 | 40.5120063 | -564164.507 |
| C_R1Ph_R2Ph_XNH_Meeq_conf5 | -564348.97  | -564132.437 | -564120.789 | 40.3683067 | -564161.157 |
| C_R1Ph_R2Ph_XNH_Meax       | -564349.129 | -564132.574 | -564120.943 | 39.9554055 | -564160.898 |
| C_R1Ph_R2Ph_XNH_Meax_conf2 | -564348.382 | -564131.888 | -564120.215 | 40.1599736 | -564160.375 |
| D_R1Ph_R2Ph_XNH_Meeq_conf3 | -564375.185 | -564158.14  | -564146.48  | 40.7121818 | -564187.192 |
| D_R1Ph_R2Ph_XNH_Meeq_conf4 | -564375.185 | -564158.14  | -564146.48  | 40.7115543 | -564187.191 |
| D_R1Ph_R2Ph_XNH_Meax       | -564374.97  | -564157.871 | -564146.204 | 40.7956406 | -564187     |
| D_R1Ph_R2Ph_XNH_Meax_conf4 | -564374.575 | -564157.478 | -564145.826 | 40.8521164 | -564186.678 |
| D_R1Ph_R2Ph_XNH_Meeq_conf2 | -564374.575 | -564157.48  | -564145.827 | 40.8502339 | -564186.677 |
| D_R1Ph_R2Ph_XNH_Meeq_conf7 | -564374.575 | -564157.479 | -564145.827 | 40.8502339 | -564186.677 |
| D_R1Ph_R2Ph_XNH_Meax_conf5 | -564374.575 | -564157.478 | -564145.826 | 40.8502339 | -564186.676 |
| D_R1Ph_R2Ph_XNH_Meeq_conf6 | -564374.575 | -564157.478 | -564145.826 | 40.8496064 | -564186.675 |
| D_R1Ph_R2Ph_XNH_Meax_conf2 | -564374.575 | -564157.478 | -564145.826 | 40.8489789 | -564186.675 |
| D_R1Ph_R2Ph_XNH_Meax_conf8 | -564373.937 | -564156.984 | -564145.273 | 40.9613031 | -564186.234 |
| D_R1Ph_R2Ph_XNH_Meeq_conf1 | -564373.937 | -564156.983 | -564145.272 | 40.9606755 | -564186.233 |
| D_R1Ph_R2Ph_XNH_Meax_conf1 | -564373.937 | -564156.984 | -564145.273 | 40.9594205 | -564186.232 |
| D_R1Ph_R2Ph_XNH_Meeq_conf8 | -564373.937 | -564156.983 | -564145.273 | 40.9594205 | -564186.232 |
| D_R1Ph_R2Ph_XNH_Meax_conf3 | -564373.937 | -564156.984 | -564145.273 | 40.9594205 | -564186.232 |
| D_R1Ph_R2Ph_XNH_Meeq_conf5 | -564373.937 | -564156.984 | -564145.273 | 40.9594205 | -564186.232 |
| D_R1Ph_R2Ph_XNH_Meeq       | -564373.809 | -564156.865 | -564145.185 | 40.8483514 | -564186.033 |
| D_R1Ph_R2Ph_XNH_Meax_conf7 | -564373.039 | -564156.055 | -564144.338 | 41.1552035 | -564185.494 |
| D_R1Ph_R2Ph_XNH_Meax_conf6 | -564372.6   | -564155.67  | -564143.933 | 41.4658206 | -564185.399 |
| E_R1Ph_R2Ph_XNH_Meeq_conf5 | -564355.722 | -564138.985 | -564127.326 | 40.4285476 | -564167.755 |
| E_R1Ph_R2Ph_XNH_Meax_conf4 | -564355.309 | -564138.798 | -564127.116 | 40.4988286 | -564167.615 |

|                                  |             |             |             |            |             |
|----------------------------------|-------------|-------------|-------------|------------|-------------|
| E_R1Ph_R2Ph_XNH_Meeq_conf4       | -564355.309 | -564138.798 | -564127.116 | 40.4982011 | -564167.615 |
| E_R1Ph_R2Ph_XNH_Meax_conf7       | -564355.309 | -564138.798 | -564127.116 | 40.4982011 | -564167.614 |
| E_R1Ph_R2Ph_XNH_Meeq             | -564355.309 | -564138.798 | -564127.116 | 40.4969461 | -564167.613 |
| E_R1Ph_R2Ph_XNH_Meax_conf5       | -564355.309 | -564138.798 | -564127.116 | 40.4969461 | -564167.613 |
| E_R1Ph_R2Ph_XNH_Meax_conf6       | -564353.382 | -564137.059 | -564125.221 | 41.5135113 | -564166.734 |
| E_R1Ph_R2Ph_XNH_Meeq_conf6       | -564353.382 | -564137.059 | -564125.221 | 41.5128838 | -564166.734 |
| E_R1Ph_R2Ph_XNH_Meax             | -564351.88  | -564135.207 | -564123.629 | 40.0984776 | -564163.728 |
| E_R1Ph_R2Ph_XNH_Meax_conf3       | -564350.32  | -564133.957 | -564122.169 | 41.0102488 | -564163.18  |
| E_R1Ph_R2Ph_XNH_Meax_conf1       | -564350.32  | -564133.957 | -564122.169 | 41.0089938 | -564163.178 |
| E_R1Ph_R2Ph_XNH_Meeq_conf1       | -564350.32  | -564133.957 | -564122.169 | 41.0089938 | -564163.178 |
| E_R1Ph_R2Ph_XNH_Meax_conf2       | -564350.32  | -564133.957 | -564122.169 | 41.0071112 | -564163.176 |
| E_R1Ph_R2Ph_XNH_Meeq_conf2       | -564350.32  | -564133.957 | -564122.169 | 41.0071112 | -564163.176 |
| E_R1Ph_R2Ph_XNH_Meeq_conf3       | -564350.32  | -564133.955 | -564122.169 | 41.0033462 | -564163.172 |
| TS_A_B_R1Ph_R2Ph_XNH_Meax-Hax    | -564277.787 | -564064.321 | -564052.032 | 42.2225969 | -564094.255 |
| TS_A_B_R1Ph_R2Ph_XNH_Meax-Heq    | -564276.854 | -564063.482 | -564051.177 | 42.3876319 | -564093.564 |
| TS_A_B_R1Ph_R2Ph_XNH_Meax        | -564277.787 | -564064.321 | -564052.032 | 42.2225969 | -564094.255 |
| TS_A_B_R1Ph_R2Ph_XNH_Meeq-Hax    | -564279.959 | -564066.667 | -564054.303 | 42.4208899 | -564096.724 |
| TS_A_B_R1Ph_R2Ph_XNH_Meeq-Heq    | -564278.732 | -564065.414 | -564053.068 | 42.4190074 | -564095.487 |
| TS_A_B_R1Ph_R2Ph_XNH_Meeq        | -564279.959 | -564066.667 | -564054.303 | 42.4208899 | -564096.724 |
| TS_A_B_R1Ph_R2Ph_XNH_Meeq_rot    | -812848.097 | -812644.179 | -812630.933 | 43.5290715 | -812674.462 |
| TS_B_C_R1Ph_R2Ph_XNH_Meax-Hax    | -564314.163 | -564098.572 | -564087.294 | 39.0731273 | -564126.367 |
| TS_B_C_R1Ph_R2Ph_XNH_Meax-Heq    | -564312.581 | -564097.15  | -564085.839 | 39.1735288 | -564125.013 |
| TS_B_C_R1Ph_R2Ph_XNH_Meax        | -564314.163 | -564098.572 | -564087.294 | 39.0731273 | -564126.367 |
| TS_B_C_R1Ph_R2Ph_XNH_Meeq-Hax    | -564318.724 | -564103.484 | -564092.173 | 39.2318872 | -564131.405 |
| TS_B_C_R1Ph_R2Ph_XNH_Meeq-Heq    | -564316.924 | -564101.589 | -564090.27  | 39.2419273 | -564129.512 |
| TS_B_C_R1Ph_R2Ph_XNH_Meeq        | -564318.724 | -564103.484 | -564092.173 | 39.2318872 | -564131.405 |
| TS_B_D_R1Ph_R2Ph_XNH_Meax-Hax    | -564315.057 | -564099.903 | -564088.469 | 39.9265401 | -564128.396 |
| TS_B_D_R1Ph_R2Ph_XNH_Meax-Heq    | -564314.408 | -564099.271 | -564087.862 | 39.8073133 | -564127.669 |
| TS_B_D_R1Ph_R2Ph_XNH_Meax        | -564315.057 | -564099.903 | -564088.469 | 39.9265401 | -564128.396 |
| TS_B_D_R1Ph_R2Ph_XNH_Meeq-Hax    | -564313.919 | -564098.947 | -564087.481 | 40.0338442 | -564127.515 |
| TS_B_D_R1Ph_R2Ph_XNH_Meeq        | -564313.779 | -564098.879 | -564087.424 | 39.9924286 | -564127.417 |
| TS_B_E_R1Ph_R2Ph_XNH_Meax_conf1- | -564314.655 | -564099.31  | -564087.803 | 41.0824124 | -564128.885 |
| TS_B_E_R1Ph_R2Ph_XNH_Meax_conf1- | -564313.642 | -564098.527 | -564087.008 | 40.4630606 | -564127.471 |
| TS_B_E_R1Ph_R2Ph_XNH_Meax_conf1  | -564314.655 | -564099.31  | -564087.803 | 41.0824124 | -564128.885 |
| TS_B_E_R1Ph_R2Ph_XNH_Meax        | -564315.422 | -564100.098 | -564088.668 | 40.0037237 | -564128.672 |
| TS_B_E_R1Ph_R2Ph_XNH_Meeq-Hax    | -564318.839 | -564103.546 | -564092.068 | 39.8681817 | -564131.936 |
| TS_B_E_R1Ph_R2Ph_XNH_Meeq-Heq    | -564317.719 | -564102.447 | -564090.926 | 40.2722977 | -564131.198 |
| TS_B_E_R1Ph_R2Ph_XNH_Meeq-isom   | -564318.839 | -564103.546 | -564092.067 | 39.8688092 | -564131.936 |
| TS_B_E_R1Ph_R2Ph_XNH_Meeq        | -564317.719 | -564102.447 | -564090.926 | 40.2722977 | -564131.198 |

|                                      |                  |                  |                  |                  |                  |                  |                  |
|--------------------------------------|------------------|------------------|------------------|------------------|------------------|------------------|------------------|
| <b>A_R1Ph_R2Ph_XNH_Me_conf2</b>      |                  |                  | <b>C</b>         | <b>-3.451934</b> | <b>-0.497174</b> | <b>-0.072939</b> |                  |
| <b>SCF Energy: -899.268529468</b>    |                  |                  | <b>C</b>         | <b>-3.595367</b> | <b>-1.570152</b> | <b>0.825324</b>  |                  |
| <b>Num. Imaginary Frequencies: 0</b> |                  |                  | <b>C</b>         | <b>-4.608019</b> | <b>0.043385</b>  | <b>-0.659541</b> |                  |
|                                      |                  |                  | <b>C</b>         | <b>-4.853645</b> | <b>-2.079934</b> | <b>1.124883</b>  |                  |
| <b>C</b>                             | <b>-2.140540</b> | <b>0.063333</b>  | <b>-0.410114</b> | <b>H</b>         | <b>-2.719277</b> | <b>-2.007475</b> | <b>1.296431</b>  |
| <b>N</b>                             | <b>-1.087814</b> | <b>-0.541404</b> | <b>0.048565</b>  | <b>C</b>         | <b>-5.865461</b> | <b>-0.472512</b> | <b>-0.352315</b> |
| <b>N</b>                             | <b>-0.159192</b> | <b>-1.059025</b> | <b>0.465501</b>  | <b>H</b>         | <b>-4.529114</b> | <b>0.865508</b>  | <b>-1.363034</b> |











|                               |           |           |           |                               |           |           |           |
|-------------------------------|-----------|-----------|-----------|-------------------------------|-----------|-----------|-----------|
| SCF Energy: -899.385804601    |           |           |           | H                             | -6.134455 | -2.088965 | 0.032435  |
| Num. Imaginary Frequencies: 0 |           |           |           | C                             | 1.408691  | 2.354489  | 0.105514  |
| C                             | -0.769049 | 1.083155  | -0.145780 | H                             | 1.895441  | 2.585482  | -0.853450 |
| N                             | -1.183780 | -0.208894 | -0.033880 | C                             | 0.596202  | 1.083316  | -0.034820 |
| N                             | -0.148729 | -1.070533 | -0.009675 | C                             | 0.935935  | -0.298196 | -0.074848 |
| C                             | -2.517754 | -0.708008 | -0.012818 | C                             | -1.633142 | 2.328920  | 0.000826  |
| C                             | -3.420010 | -0.249598 | 0.946012  | H                             | -2.076285 | 2.438113  | 0.999025  |
| C                             | -2.895086 | -1.669836 | -0.949512 | H                             | -2.458938 | 2.293131  | -0.714584 |
| C                             | -4.723555 | -0.743439 | 0.947918  | C                             | -0.715241 | 3.525781  | -0.308530 |
| H                             | -3.097283 | 0.466835  | 1.694376  | H                             | -0.475928 | 3.529726  | -1.378640 |
| C                             | -4.194916 | -2.169388 | -0.928960 | H                             | -1.235508 | 4.460590  | -0.084852 |
| H                             | -2.168875 | -2.014350 | -1.678078 | N                             | 0.545337  | 3.502650  | 0.428252  |
| C                             | -5.112720 | -1.702154 | 0.012843  | C                             | 2.481648  | 2.251848  | 1.187351  |
| H                             | -5.428969 | -0.389285 | 1.692472  | H                             | 3.006327  | 3.206871  | 1.277666  |
| H                             | -4.492650 | -2.919111 | -1.654732 | H                             | 2.018193  | 2.011849  | 2.150902  |
| H                             | -6.126365 | -2.089271 | 0.022007  | H                             | 3.210092  | 1.471726  | 0.960945  |
| C                             | 1.433478  | 2.315766  | -0.278335 | C                             | 2.263998  | -0.939668 | -0.141259 |
| H                             | 2.154200  | 2.229939  | -1.098650 | H                             | 0.345710  | 3.487859  | 1.427908  |
| C                             | 0.609010  | 1.057783  | -0.195739 | C                             | 3.293852  | -0.363087 | -0.894726 |
| C                             | 0.949262  | -0.319276 | -0.093587 | C                             | 4.542824  | -0.975523 | -0.973018 |
| C                             | -1.608733 | 2.316993  | -0.235091 | C                             | 4.776334  | -2.176832 | -0.302990 |
| H                             | -2.467150 | 2.282051  | 0.439678  | C                             | 3.752440  | -2.762206 | 0.442895  |
| H                             | -1.991620 | 2.435640  | -1.255618 | C                             | 2.504758  | -2.147694 | 0.524725  |
| C                             | -0.701440 | 3.497198  | 0.125464  | H                             | 3.110785  | 0.564353  | -1.431454 |
| H                             | -1.200308 | 4.437858  | -0.118389 | H                             | 5.331322  | -0.518012 | -1.562395 |
| H                             | -0.524046 | 3.486559  | 1.213423  | H                             | 5.749149  | -2.654472 | -0.363197 |
| N                             | 0.533681  | 3.420964  | -0.655580 | H                             | 3.927618  | -3.696738 | 0.966892  |
| C                             | 2.216640  | 2.560208  | 1.019707  | H                             | 1.707688  | -2.596296 | 1.109550  |
| H                             | 2.839267  | 3.455893  | 0.926438  | D_R1Ph_R2Ph_XNH_Meax          |           |           |           |
| H                             | 1.535655  | 2.689967  | 1.866280  | SCF Energy: -899.388880864    |           |           |           |
| H                             | 2.869965  | 1.709578  | 1.239090  | Num. Imaginary Frequencies: 0 |           |           |           |
| C                             | 2.276094  | -0.966287 | -0.038922 | C                             | 0.778777  | 1.091795  | 0.145140  |
| H                             | 1.041801  | 4.297562  | -0.581903 | N                             | 1.185409  | -0.210822 | 0.145401  |
| C                             | 2.449801  | -2.140760 | 0.706602  | N                             | 0.141091  | -1.062143 | 0.150702  |
| C                             | 3.692275  | -2.766848 | 0.763036  | C                             | 2.509293  | -0.721123 | 0.094606  |
| C                             | 4.783379  | -2.226936 | 0.080406  | C                             | 2.774431  | -1.846569 | -0.687881 |
| C                             | 4.619596  | -1.059373 | -0.664189 | C                             | 3.526053  | -0.107629 | 0.826790  |
| C                             | 3.374871  | -0.434946 | -0.725389 | C                             | 4.070140  | -2.352496 | -0.739535 |
| H                             | 1.601763  | -2.552279 | 1.244604  | H                             | 1.966061  | -2.308987 | -1.242959 |
| H                             | 3.810869  | -3.674575 | 1.346695  | C                             | 4.822715  | -0.613744 | 0.754207  |
| H                             | 5.752847  | -2.712727 | 0.128220  | H                             | 3.303160  | 0.741813  | 1.462970  |
| H                             | 5.459743  | -0.636034 | -1.205842 | C                             | 5.098962  | -1.735469 | -0.026025 |
| H                             | 3.256093  | 0.459474  | -1.328118 | H                             | 4.277411  | -3.227464 | -1.347111 |
| D_R1Ph_R2Ph_XNH_Meax_conf8    |           |           |           | H                             | 5.613489  | -0.136391 | 1.323651  |
| SCF Energy: -899.387234855    |           |           |           | H                             | 6.108491  | -2.130050 | -0.074281 |
| Num. Imaginary Frequencies: 0 |           |           |           | C                             | -1.411871 | 2.355946  | 0.068990  |
| C                             | -0.784278 | 1.099718  | -0.055646 | H                             | -2.108371 | 2.423051  | 0.911569  |
| N                             | -1.197023 | -0.197817 | -0.082142 | C                             | -0.600316 | 1.082512  | 0.166984  |
| N                             | -0.159113 | -1.057455 | -0.086780 | C                             | -0.949546 | -0.298035 | 0.162559  |
| C                             | -2.529134 | -0.700008 | -0.059025 | C                             | 1.627454  | 2.315680  | 0.015312  |
| C                             | -2.883790 | -1.630151 | 0.917922  | H                             | 2.478101  | 2.137076  | -0.651511 |
| C                             | -3.453700 | -0.276802 | -1.012925 | H                             | 2.033221  | 2.618771  | 0.988550  |
| C                             | -4.182389 | -2.132417 | 0.943186  | C                             | 0.724145  | 3.434626  | -0.533117 |
| H                             | -2.141208 | -1.948326 | 1.641978  | H                             | 1.241307  | 4.395310  | -0.469886 |
| C                             | -4.755546 | -0.773051 | -0.969357 | H                             | 0.517062  | 3.245150  | -1.591843 |
| H                             | -3.149732 | 0.412862  | -1.793358 | N                             | -0.552185 | 3.549727  | 0.171665  |
| C                             | -5.121949 | -1.699700 | 0.006248  | C                             | -2.227477 | 2.398101  | -1.226099 |
| H                             | -4.462040 | -2.857409 | 1.700603  | H                             | -2.844122 | 3.299980  | -1.249737 |
| H                             | -5.477712 | -0.446400 | -1.710417 | H                             | -1.564920 | 2.402230  | -2.097150 |
|                               |           |           |           | H                             | -2.876373 | 1.520756  | -1.303286 |

|   |           |           |           |
|---|-----------|-----------|-----------|
| C | -2.282085 | -0.933234 | 0.165193  |
| H | -0.368881 | 3.744323  | 1.153128  |
| C | -3.375158 | -0.319127 | 0.788698  |
| C | -4.628495 | -0.928791 | 0.785589  |
| C | -4.805962 | -2.163882 | 0.162903  |
| C | -3.720250 | -2.786225 | -0.455405 |
| C | -2.469037 | -2.175240 | -0.456914 |
| H | -3.244431 | 0.632467  | 1.294490  |
| H | -5.464793 | -0.440354 | 1.275931  |
| H | -5.782175 | -2.638336 | 0.159720  |
| H | -3.850230 | -3.747062 | -0.943806 |
| H | -1.624852 | -2.652194 | -0.944796 |

Num. Imaginary Frequencies: 0

D\_R1Ph\_R2Ph\_XNH\_Meeq\_conf3

SCF Energy: -899.389224490

Num. Imaginary Frequencies: 0

|   |           |           |           |
|---|-----------|-----------|-----------|
| C | -0.786187 | 1.094487  | -0.031937 |
| N | -1.197338 | -0.204174 | 0.045437  |
| N | -0.155826 | -1.059237 | 0.061038  |
| C | -2.523848 | -0.711722 | 0.030971  |
| C | -2.801490 | -1.869795 | -0.697765 |
| C | -3.530505 | -0.062364 | 0.746091  |
| C | -4.099715 | -2.372092 | -0.713039 |
| H | -2.000984 | -2.359884 | -1.240233 |
| C | -4.829718 | -0.565877 | 0.709894  |
| H | -3.298374 | 0.812841  | 1.342628  |
| C | -5.118600 | -1.719756 | -0.017015 |
| H | -4.316661 | -3.272208 | -1.279064 |
| H | -5.612400 | -0.060397 | 1.266124  |
| H | -6.130086 | -2.111777 | -0.037313 |
| C | 1.406822  | 2.355820  | -0.093892 |
| H | 1.921387  | 2.419272  | -1.063756 |
| C | 0.593410  | 1.080074  | -0.046096 |
| C | 0.936828  | -0.300716 | 0.003190  |
| C | -0.711554 | 3.424609  | -0.739399 |
| H | -0.464527 | 3.212025  | -1.786091 |
| H | -1.229229 | 4.386753  | -0.710819 |
| C | -1.631109 | 2.317460  | -0.193300 |
| H | -2.053893 | 2.640197  | 0.765856  |
| H | -2.470183 | 2.128468  | -0.872335 |
| N | 0.542118  | 3.543062  | 0.001559  |
| C | 2.450319  | 2.428562  | 1.018531  |
| H | 2.996409  | 3.373872  | 0.955237  |
| H | 1.958481  | 2.369468  | 1.995815  |
| H | 3.164059  | 1.605348  | 0.950444  |
| C | 2.266163  | -0.943170 | -0.013749 |
| H | 0.332239  | 3.717356  | 0.983783  |
| C | 3.308004  | -0.408030 | -0.781234 |
| C | 4.557092  | -1.024993 | -0.808584 |
| C | 4.779627  | -2.188478 | -0.071800 |
| C | 3.744259  | -2.732180 | 0.689770  |
| C | 2.496349  | -2.113834 | 0.720035  |
| H | 3.136047  | 0.487889  | -1.371617 |
| H | 5.354358  | -0.600064 | -1.410416 |
| H | 5.752793  | -2.668773 | -0.091850 |
| H | 3.910684  | -3.636762 | 1.266506  |
| H | 1.690318  | -2.529210 | 1.316822  |

|   |           |           |           |
|---|-----------|-----------|-----------|
| C | 1.090916  | -0.812554 | 0.032597  |
| N | 0.646970  | -2.023608 | -0.058311 |
| N | -0.757873 | -2.020999 | -0.025240 |
| C | 2.545562  | -0.565930 | 0.113984  |
| C | 3.094748  | 0.717485  | -0.007812 |
| C | 3.405334  | -1.657238 | 0.328469  |
| C | 4.475284  | 0.901328  | 0.075608  |
| H | 2.441645  | 1.567370  | -0.187917 |
| C | 4.779377  | -1.467681 | 0.410521  |
| H | 2.980429  | -2.649479 | 0.432538  |
| C | 5.320792  | -0.185660 | 0.284431  |
| H | 4.887910  | 1.900360  | -0.024967 |
| H | 5.430670  | -2.319764 | 0.577725  |
| H | 6.394192  | -0.038204 | 0.351607  |
| C | -0.187272 | 1.172736  | -1.089749 |
| H | -1.269581 | 1.326334  | -1.230508 |
| C | -0.047832 | 0.187740  | 0.126003  |
| C | -1.186614 | -0.809947 | 0.109342  |
| C | 0.073745  | 1.138653  | 1.359439  |
| H | 1.041487  | 0.980741  | 1.840229  |
| H | -0.696670 | 0.941701  | 2.107308  |
| C | -0.008347 | 2.564049  | 0.780784  |
| H | -1.037441 | 2.949839  | 0.835649  |
| H | 0.638737  | 3.260584  | 1.320027  |
| N | 0.447723  | 2.395272  | -0.598727 |
| C | 0.404062  | 0.679467  | -2.399601 |
| H | 0.192804  | 1.395240  | -3.198916 |
| H | 1.487808  | 0.559046  | -2.319960 |
| H | -0.039362 | -0.281236 | -2.681110 |
| C | -2.636333 | -0.533747 | 0.146064  |
| H | 0.203541  | 3.191131  | -1.182500 |
| C | -3.153710 | 0.690164  | 0.589221  |
| C | -4.530140 | 0.908421  | 0.624462  |
| C | -5.408522 | -0.091932 | 0.214612  |
| C | -4.902904 | -1.314868 | -0.232893 |
| C | -3.531036 | -1.534505 | -0.267764 |
| H | -2.490215 | 1.481624  | 0.915748  |
| H | -4.912452 | 1.861902  | 0.974253  |
| H | -6.479987 | 0.079106  | 0.239790  |
| H | -5.580795 | -2.096882 | -0.559721 |
| H | -3.133120 | -2.479943 | -0.619647 |

E\_R1Ph\_R2Ph\_XNH\_Meeq\_conf5

SCF Energy: -899.358207817

Num. Imaginary Frequencies: 0

|   |           |           |           |
|---|-----------|-----------|-----------|
| C | 1.239182  | -0.770804 | -0.241748 |
| N | 0.819267  | -1.993243 | -0.312397 |
| N | -0.584525 | -2.005211 | -0.363282 |
| C | 2.681655  | -0.467053 | -0.169836 |
| C | 3.600686  | -1.530196 | -0.148199 |
| C | 3.172553  | 0.845487  | -0.122209 |
| C | 4.966175  | -1.285156 | -0.081381 |
| H | 3.225206  | -2.546922 | -0.183435 |
| C | 4.544129  | 1.088775  | -0.054203 |
| H | 2.497388  | 1.693591  | -0.137375 |
| C | 5.444478  | 0.026966  | -0.034123 |
| H | 5.661377  | -2.118429 | -0.064892 |
| H | 4.904262  | 2.111747  | -0.017757 |
| H | 6.511635  | 0.217502  | 0.018464  |

E\_R1Ph\_R2Ph\_XNH\_Meax\_conf4

SCF Energy: -899.357549842

|   |           |           |           |
|---|-----------|-----------|-----------|
| C | 0.035698  | 0.993867  | 1.182536  |
| H | 1.074137  | 1.251426  | 1.421341  |
| C | 0.095041  | 0.204815  | -0.199408 |
| C | -1.031228 | -0.791167 | -0.319457 |
| C | -0.212774 | 2.637866  | -0.442676 |
| H | 0.697889  | 3.237617  | -0.335989 |
| H | -0.962044 | 3.268642  | -0.926665 |
| C | 0.105522  | 1.344728  | -1.253701 |
| H | -0.627844 | 1.152236  | -2.038630 |
| H | 1.075468  | 1.409179  | -1.750512 |
| N | -0.665838 | 2.229668  | 0.887106  |
| C | -0.552892 | 0.226028  | 2.353027  |
| H | -1.624010 | 0.046922  | 2.216472  |
| H | -0.054104 | -0.741835 | 2.463742  |
| H | -0.412356 | 0.793447  | 3.275682  |
| C | -2.488587 | -0.544049 | -0.289467 |
| H | -1.669753 | 2.059548  | 0.886410  |
| C | -3.077835 | 0.643817  | -0.744938 |
| C | -4.459968 | 0.819988  | -0.680792 |
| C | -5.273238 | -0.183884 | -0.160606 |
| C | -4.697048 | -1.371554 | 0.294930  |
| C | -3.319985 | -1.549835 | 0.231675  |
| H | -2.475677 | 1.435434  | -1.175193 |
| H | -4.897630 | 1.744285  | -1.043667 |
| H | -6.347995 | -0.042819 | -0.108130 |
| H | -5.322125 | -2.156986 | 0.707570  |
| H | -2.865538 | -2.464916 | 0.596033  |

TS\_A\_B\_R1Ph\_R2Ph\_XNH\_Meax  
 SCF Energy: -899.234010561  
 Num. Imaginary Frequencies: 1  
 Imaginary Frequency: -452.7642

|   |           |           |           |
|---|-----------|-----------|-----------|
| C | 1.215357  | 0.320820  | 1.105610  |
| N | 0.284636  | -0.279691 | 1.868251  |
| N | -0.812732 | -0.620422 | 1.928356  |
| C | 2.171551  | -0.646708 | 0.488724  |
| C | 1.680760  | -1.811633 | -0.119579 |
| C | 3.549024  | -0.401124 | 0.468765  |
| C | 2.546369  | -2.700495 | -0.746484 |
| H | 0.611057  | -2.004911 | -0.116813 |
| C | 4.415231  | -1.290068 | -0.168349 |
| H | 3.956906  | 0.482566  | 0.948517  |
| C | 3.918544  | -2.439304 | -0.779395 |
| H | 2.150707  | -3.594438 | -1.218072 |
| H | 5.480664  | -1.083218 | -0.180014 |
| H | 4.593659  | -3.129321 | -1.275192 |
| C | 0.364391  | 1.856507  | -1.273427 |
| H | -0.410734 | 2.338412  | -1.881536 |
| C | -0.357434 | 0.872349  | -0.403599 |
| C | -1.407666 | 0.296034  | -0.069174 |
| C | 1.677666  | 1.682398  | 1.574379  |
| H | 2.531215  | 1.599514  | 2.260553  |
| H | 0.860073  | 2.153509  | 2.130563  |
| C | 2.067376  | 2.592336  | 0.392701  |
| H | 2.465034  | 3.522098  | 0.810241  |
| H | 2.879602  | 2.139583  | -0.183964 |
| N | 0.998904  | 2.952326  | -0.528512 |
| C | 1.347447  | 1.195637  | -2.240203 |
| H | 1.782339  | 1.961692  | -2.888054 |
| H | 2.154088  | 0.673391  | -1.721993 |
| H | 0.820748  | 0.463731  | -2.857751 |

|   |           |           |           |
|---|-----------|-----------|-----------|
| C | -2.793981 | -0.105949 | -0.098631 |
| H | 0.278335  | 3.466470  | -0.027474 |
| C | -3.160861 | -1.460739 | -0.056627 |
| C | -4.500889 | -1.832500 | -0.115915 |
| C | -5.499599 | -0.860319 | -0.197750 |
| C | -5.145775 | 0.488979  | -0.225818 |
| C | -3.805439 | 0.865611  | -0.181514 |
| H | -2.385173 | -2.216460 | 0.025147  |
| H | -4.767340 | -2.884682 | -0.089878 |
| H | -6.544223 | -1.152202 | -0.235927 |
| H | -5.915454 | 1.252363  | -0.286747 |
| H | -3.529584 | 1.915409  | -0.210559 |

TS\_A\_B\_R1Ph\_R2Ph\_XNH\_Meeq  
 SCF Energy: -899.237471564  
 Num. Imaginary Frequencies: 1  
 Imaginary Frequency: -449.9543

|   |           |           |           |
|---|-----------|-----------|-----------|
| C | 1.326470  | 0.165458  | -1.129319 |
| N | 0.448639  | -0.551665 | -1.851654 |
| N | -0.636938 | -0.924158 | -1.927407 |
| C | 2.294703  | -0.668149 | -0.358865 |
| C | 1.829581  | -1.776025 | 0.366264  |
| C | 3.658774  | -0.357893 | -0.318372 |
| C | 2.708346  | -2.551742 | 1.113894  |
| H | 0.770038  | -2.018631 | 0.348357  |
| C | 4.537701  | -1.132828 | 0.438852  |
| H | 4.048001  | 0.480820  | -0.886268 |
| C | 4.067172  | -2.230049 | 1.156495  |
| H | 2.332888  | -3.404911 | 1.669925  |
| H | 5.592809  | -0.879133 | 0.459446  |
| H | 4.752223  | -2.832788 | 1.743987  |
| C | 0.513774  | 1.762371  | 1.091590  |
| H | 1.403890  | 1.271377  | 1.508573  |
| C | -0.262199 | 0.767631  | 0.291877  |
| C | -1.315582 | 0.185899  | -0.018549 |
| C | 2.061631  | 2.548104  | -0.657628 |
| H | 2.924770  | 2.225791  | -0.065990 |
| C | 2.357321  | 3.465602  | -1.174862 |
| H | 1.731710  | 1.493722  | -1.733226 |
| H | 0.899693  | 1.858392  | -2.345337 |
| H | 2.599294  | 1.381825  | -2.397419 |
| N | 0.998060  | 2.882992  | 0.276984  |
| C | -0.343163 | 2.300306  | 2.236421  |
| H | -1.209702 | 2.835811  | 1.834358  |
| H | -0.708675 | 1.480800  | 2.859948  |
| H | 0.243188  | 2.989652  | 2.849119  |
| C | -2.700541 | -0.216742 | 0.020463  |
| H | 0.210324  | 3.298300  | -0.217835 |
| C | -3.711386 | 0.755054  | 0.114044  |
| C | -5.051215 | 0.378898  | 0.170702  |
| C | -5.405381 | -0.970503 | 0.146949  |
| C | -4.407653 | -1.942892 | 0.056433  |
| C | -3.068160 | -1.571609 | -0.017138 |
| H | -3.434346 | 1.804704  | 0.141507  |
| H | -5.820124 | 1.142427  | 0.238975  |
| H | -6.449628 | -1.262224 | 0.195545  |
| H | -4.674596 | -2.995036 | 0.034208  |
| H | -2.293181 | -2.327024 | -0.107014 |

TS\_B\_C\_R1Ph\_R2Ph\_XNH\_Meax-Heq

SCF Energy: -899.289457619  
 Num. Imaginary Frequencies: 1  
 Imaginary Frequency: -550.7003

|   |           |           |           |
|---|-----------|-----------|-----------|
| C | 1.246894  | -0.827177 | -1.167746 |
| N | 0.623220  | -0.603428 | -2.370964 |
| N | -0.644993 | -0.322092 | -2.125915 |
| C | 1.433449  | 0.731121  | -0.289536 |
| C | 0.794297  | 1.915557  | -0.692183 |
| C | 2.632207  | 0.819546  | 0.421991  |
| C | 1.354040  | 3.148326  | -0.395606 |
| H | -0.143470 | 1.877084  | -1.236206 |
| C | 3.183380  | 2.065996  | 0.727243  |
| H | 3.174503  | -0.065311 | 0.721651  |
| C | 2.550469  | 3.234544  | 0.324295  |
| H | 0.842388  | 4.049865  | -0.716184 |
| H | 4.119220  | 2.106501  | 1.274852  |
| H | 2.976966  | 4.202548  | 0.564815  |
| C | 0.382239  | -1.525042 | 1.179072  |
| H | -0.646768 | -1.839431 | 1.388302  |
| C | 0.273296  | -0.708189 | -0.097888 |
| C | -0.917418 | -0.389649 | -0.810815 |
| C | 2.439489  | -1.745724 | -1.062735 |
| H | 3.384500  | -1.225954 | -1.244255 |
| H | 2.307203  | -2.471764 | -1.868866 |
| C | 2.470477  | -2.496406 | 0.288897  |
| H | 2.947409  | -3.466557 | 0.132767  |
| H | 3.097122  | -1.962752 | 1.018023  |
| N | 1.116576  | -2.741628 | 0.784907  |
| C | 0.905839  | -0.837107 | 2.447655  |
| H | 0.642675  | -1.452240 | 3.312287  |
| H | 1.989363  | -0.713726 | 2.442618  |
| H | 0.462045  | 0.153585  | 2.582138  |
| C | -2.243252 | -0.081771 | -0.274116 |
| H | 1.148522  | -3.386288 | 1.570220  |
| C | -3.389441 | -0.238812 | -1.069778 |
| C | -4.647073 | 0.058965  | -0.556874 |
| C | -4.784532 | 0.514756  | 0.757328  |
| C | -3.651820 | 0.677616  | 1.552630  |
| C | -2.388658 | 0.385232  | 1.039452  |
| H | -3.279497 | -0.601361 | -2.086808 |
| H | -5.526029 | -0.069791 | -1.180868 |
| H | -5.768171 | 0.742744  | 1.155332  |
| H | -3.747489 | 1.040599  | 2.571152  |
| H | -1.507398 | 0.541604  | 1.655115  |

TS\_B\_C\_R1Ph\_R2Ph\_XNH\_Meax  
 SCF Energy: -899.291979738  
 Num. Imaginary Frequencies: 1  
 Imaginary Frequency: -544.1086

|   |           |           |           |
|---|-----------|-----------|-----------|
| C | -1.250708 | -0.835333 | 1.160752  |
| N | -0.623390 | -0.635571 | 2.367052  |
| N | 0.645285  | -0.351599 | 2.124704  |
| C | -1.435850 | 0.727020  | 0.297896  |
| C | -0.809835 | 1.909695  | 0.725678  |
| C | -2.624252 | 0.816894  | -0.430900 |
| C | -1.371793 | 3.142700  | 0.434513  |
| H | 0.119067  | 1.868269  | 1.284720  |
| C | -3.177563 | 2.063469  | -0.730261 |
| H | -3.155924 | -0.067909 | -0.749746 |
| C | -2.557219 | 3.230495  | -0.303371 |

|   |           |           |           |
|---|-----------|-----------|-----------|
| H | -0.871090 | 4.043414  | 0.774082  |
| H | -4.104549 | 2.105752  | -1.292534 |
| H | -2.985373 | 4.198926  | -0.539165 |
| C | -0.385176 | -1.511583 | -1.200906 |
| H | 0.643880  | -1.826453 | -1.407297 |
| C | -0.278076 | -0.698783 | 0.088894  |
| C | 0.914335  | -0.392685 | 0.808388  |
| C | -2.442840 | -1.749997 | 1.040652  |
| H | -3.390448 | -1.227360 | 1.200954  |
| H | -2.333593 | -2.470021 | 1.856478  |
| C | -2.455407 | -2.513447 | -0.317514 |
| H | -2.921926 | -3.488461 | -0.159998 |
| H | -3.084537 | -1.996880 | -1.047502 |
| N | -1.149517 | -2.738441 | -0.932069 |
| C | -0.896191 | -0.813186 | -2.462397 |
| H | -0.608428 | -1.411268 | -3.329357 |
| H | -1.981931 | -0.712573 | -2.474026 |
| H | -0.471360 | 0.188903  | -2.565138 |
| C | 2.239255  | -0.077198 | 0.273782  |
| H | -0.595374 | -3.352777 | -0.339989 |
| C | 3.386206  | -0.230458 | 1.069433  |
| C | 4.642698  | 0.072814  | 0.557109  |
| C | 4.778756  | 0.530370  | -0.756690 |
| C | 3.645550  | 0.689587  | -1.551938 |
| C | 2.383426  | 0.391723  | -1.039332 |
| H | 3.277691  | -0.593748 | 2.086368  |
| H | 5.521998  | -0.052729 | 1.181284  |
| H | 5.761565  | 0.762624  | -1.154249 |
| H | 3.739851  | 1.053739  | -2.570157 |
| H | 1.501925  | 0.545221  | -1.655271 |

TS\_B\_C\_R1Ph\_R2Ph\_XNH\_Meeq-Heq  
 SCF Energy: -899.296378769  
 Num. Imaginary Frequencies: 1  
 Imaginary Frequency: -523.5773

|   |           |           |           |
|---|-----------|-----------|-----------|
| C | 1.410790  | -0.737263 | 1.091507  |
| N | 0.788132  | -0.592589 | 2.310882  |
| N | -0.498272 | -0.403329 | 2.093453  |
| C | 1.452446  | 0.825577  | 0.228898  |
| C | 2.466276  | 1.007679  | -0.712446 |
| C | 0.833695  | 1.950657  | 0.795075  |
| C | 2.862128  | 2.296213  | -1.081693 |
| H | 2.977694  | 0.166340  | -1.158917 |
| C | 1.242090  | 3.224528  | 0.434366  |
| H | 0.034850  | 1.831252  | 1.520253  |
| C | 2.257304  | 3.408400  | -0.511884 |
| H | 3.653332  | 2.413493  | -1.814848 |
| H | 0.756911  | 4.082208  | 0.888602  |
| H | 2.565226  | 4.408693  | -0.797037 |
| C | 0.602878  | -1.420152 | -1.294566 |
| H | 0.592246  | -0.697445 | -2.117411 |
| C | 0.398599  | -0.708046 | 0.041740  |
| C | -0.792196 | -0.463677 | 0.778859  |
| C | 2.407349  | -2.638219 | -0.088292 |
| H | 3.321280  | -3.200152 | -0.294477 |
| H | 1.679235  | -3.344325 | 0.328549  |
| C | 2.681310  | -1.534544 | 0.954098  |
| H | 2.916569  | -1.967474 | 1.929859  |
| H | 3.532557  | -0.920206 | 0.649918  |
| N | 1.886360  | -2.135659 | -1.354214 |
| C | -0.531596 | -2.432299 | -1.506666 |

|   |           |           |           |
|---|-----------|-----------|-----------|
| H | -0.370956 | -2.933591 | -2.462886 |
| H | -0.520834 | -3.185481 | -0.712811 |
| H | -1.512602 | -1.954433 | -1.513386 |
| C | -2.122777 | -0.101533 | 0.282314  |
| H | 2.590602  | -1.614369 | -1.861179 |
| C | -2.255920 | 0.534650  | -0.959849 |
| C | -3.512748 | 0.905704  | -1.433664 |
| C | -4.650787 | 0.653491  | -0.667927 |
| C | -4.524139 | 0.030721  | 0.576104  |
| C | -3.270476 | -0.343757 | 1.050400  |
| H | -1.367705 | 0.747924  | -1.550784 |
| H | -3.601510 | 1.397869  | -2.397090 |
| H | -5.630343 | 0.941665  | -1.035852 |
| H | -5.406945 | -0.167318 | 1.176049  |
| H | -3.168501 | -0.832400 | 2.014350  |

TS\_B\_C\_R1Ph\_R2Ph\_XNH\_Meeq  
 SCF Energy: -899.299248417  
 Num. Imaginary Frequencies: 1  
 Imaginary Frequency: -516.6258

|   |           |           |           |
|---|-----------|-----------|-----------|
| C | 1.381910  | -0.742901 | 1.106844  |
| N | 0.765432  | -0.551293 | 2.322258  |
| N | -0.514071 | -0.320281 | 2.101412  |
| C | 1.487508  | 0.805365  | 0.217356  |
| C | 2.461420  | 0.917538  | -0.775368 |
| C | 0.956442  | 1.959088  | 0.810800  |
| C | 2.913973  | 2.183609  | -1.159790 |
| H | 2.853982  | 0.026959  | -1.253441 |
| C | 1.421422  | 3.207042  | 0.427844  |
| H | 0.189290  | 1.883385  | 1.575092  |
| C | 2.404433  | 3.328916  | -0.562082 |
| H | 3.671277  | 2.258497  | -1.933607 |
| H | 1.010055  | 4.092411  | 0.901530  |
| H | 2.759123  | 4.309712  | -0.861104 |
| C | 0.547694  | -1.417051 | -1.263486 |
| H | 0.483417  | -0.702153 | -2.093226 |
| C | 0.369485  | -0.698090 | 0.060922  |
| C | -0.812349 | -0.399551 | 0.788777  |
| C | 2.338119  | -2.659113 | -0.071286 |
| H | 3.245794  | -3.224382 | -0.293314 |
| H | 1.594701  | -3.365824 | 0.332382  |
| C | 2.629044  | -1.582978 | 0.981766  |
| H | 2.833277  | -2.030896 | 1.957082  |
| H | 3.498254  | -0.990407 | 0.686789  |
| N | 1.899338  | -2.006116 | -1.306814 |
| C | -0.557020 | -2.472065 | -1.429969 |
| H | -0.405403 | -2.999942 | -2.375868 |
| H | -0.525358 | -3.199906 | -0.613943 |
| H | -1.550244 | -2.018540 | -1.447115 |
| C | -2.140162 | -0.039888 | 0.283284  |
| H | 1.947473  | -2.652790 | -2.088189 |
| C | -2.275127 | 0.545301  | -0.983384 |
| C | -3.531883 | 0.904297  | -1.466822 |
| C | -4.668298 | 0.691140  | -0.686982 |
| C | -4.539816 | 0.119612  | 0.581160  |
| C | -3.286472 | -0.243621 | 1.064836  |
| H | -1.388913 | 0.731746  | -1.585765 |
| H | -3.621531 | 1.357440  | -2.449127 |
| H | -5.647603 | 0.970256  | -1.062470 |
| H | -5.421070 | -0.047887 | 1.192607  |
| H | -3.183346 | -0.693758 | 2.047185  |

TS\_B\_D\_R1Ph\_R2Ph\_XNH\_Meax  
 SCF Energy: -899.293403456  
 Num. Imaginary Frequencies: 1  
 Imaginary Frequency: -604.4428

|   |           |           |           |
|---|-----------|-----------|-----------|
| C | -1.046772 | 0.586543  | -0.942909 |
| N | -0.854067 | -0.620360 | -1.667712 |
| N | 0.364387  | -1.074835 | -1.401263 |
| C | -1.995979 | -0.822290 | -0.318981 |
| C | -1.576669 | -1.383931 | 0.887617  |
| C | -3.309195 | -0.979076 | -0.760916 |
| C | -2.495482 | -2.073128 | 1.670742  |
| H | -0.546836 | -1.279025 | 1.215215  |
| C | -4.222034 | -1.665122 | 0.039180  |
| H | -3.608131 | -0.604294 | -1.733459 |
| C | -3.823695 | -2.210079 | 1.258112  |
| H | -2.170451 | -2.499127 | 2.614576  |
| H | -5.242574 | -1.788247 | -0.308877 |
| H | -4.535081 | -2.746411 | 1.876879  |
| C | 0.304016  | 2.111658  | 0.593704  |
| H | 1.346542  | 2.447005  | 0.573821  |
| C | 0.157280  | 0.872490  | -0.253536 |
| C | 1.003379  | -0.179650 | -0.596170 |
| C | -1.946438 | 1.721943  | -1.365483 |
| H | -2.982168 | 1.413860  | -1.514292 |
| H | -1.570366 | 2.093572  | -2.326670 |
| C | -1.867390 | 2.834571  | -0.307485 |
| H | -2.386722 | 3.722512  | -0.676660 |
| H | -2.393623 | 2.511598  | 0.597466  |
| N | -0.504609 | 3.221716  | 0.058360  |
| C | -0.097129 | 1.837939  | 2.048932  |
| H | 0.036141  | 2.743346  | 2.646074  |
| H | -1.143963 | 1.526175  | 2.113823  |
| H | 0.503515  | 1.033462  | 2.482720  |
| C | 2.420143  | -0.411944 | -0.250039 |
| H | -0.038465 | 3.597984  | -0.764176 |
| C | 3.000371  | 0.143829  | 0.896782  |
| C | 4.343744  | -0.083399 | 1.192221  |
| C | 5.124345  | -0.868853 | 0.345917  |
| C | 4.552870  | -1.430150 | -0.797563 |
| C | 3.211848  | -1.205354 | -1.093267 |
| H | 2.403029  | 0.741311  | 1.576133  |
| H | 4.776866  | 0.350756  | 2.087716  |
| H | 6.170367  | -1.044899 | 0.575918  |
| H | 5.154537  | -2.043097 | -1.461291 |
| H | 2.764139  | -1.638115 | -1.981750 |

TS\_B\_D\_R1Ph\_R2Ph\_XNH\_Meeq-Hax  
 SCF Energy: -899.291590492  
 Num. Imaginary Frequencies: 1  
 Imaginary Frequency: -594.8168

|   |           |           |           |
|---|-----------|-----------|-----------|
| C | -1.144603 | 0.742827  | 0.812036  |
| N | -0.992890 | -0.340605 | 1.718667  |
| N | 0.227170  | -0.839602 | 1.566831  |
| C | -2.062933 | -0.741964 | 0.337625  |
| C | -3.389947 | -0.865835 | 0.746741  |
| C | -1.587861 | -1.447025 | -0.768233 |
| C | -4.259693 | -1.670200 | 0.011639  |
| H | -3.732805 | -0.374293 | 1.650156  |

|   |           |           |           |
|---|-----------|-----------|-----------|
| C | -2.464715 | -2.252868 | -1.486605 |
| H | -0.548735 | -1.367151 | -1.070591 |
| C | -3.805182 | -2.362519 | -1.108844 |
| H | -5.290731 | -1.768236 | 0.335787  |
| H | -2.096012 | -2.790740 | -2.354120 |
| H | -4.482937 | -2.990463 | -1.677108 |
| C | 0.307946  | 2.040824  | -0.862280 |
| H | 0.131103  | 1.629927  | -1.869612 |
| C | 0.093221  | 0.928885  | 0.142545  |
| C | 0.897956  | -0.088446 | 0.648405  |
| C | -2.015831 | 2.702991  | -0.356816 |
| H | -2.387490 | 2.087324  | -1.186561 |
| H | -2.656035 | 3.586556  | -0.293499 |
| C | -2.099836 | 1.900139  | 0.949142  |
| H | -1.768934 | 2.521917  | 1.789571  |
| H | -3.123898 | 1.586292  | 1.151396  |
| N | -0.659815 | 3.135792  | -0.679680 |
| C | 1.708176  | 2.648504  | -0.815460 |
| H | 1.929655  | 3.002950  | 0.197371  |
| H | 2.479224  | 1.932040  | -1.097339 |
| H | 1.752476  | 3.497801  | -1.502169 |
| C | 2.279729  | -0.479262 | 0.297957  |
| H | -0.322289 | 3.743460  | 0.065741  |
| C | 2.668943  | -0.589010 | -1.041806 |
| C | 3.961541  | -0.991912 | -1.369757 |
| C | 4.876761  | -1.289981 | -0.359590 |
| C | 4.491728  | -1.191445 | 0.977967  |
| C | 3.197245  | -0.793590 | 1.306099  |
| H | 1.953458  | -0.363890 | -1.829535 |
| H | 4.252417  | -1.076588 | -2.411977 |
| H | 5.884840  | -1.601645 | -0.614033 |
| H | 5.199935  | -1.425415 | 1.766506  |
| H | 2.889610  | -0.719618 | 2.344705  |

TS\_B\_E\_R1Ph\_R2Ph\_XNH\_Meax\_conf1-Hax  
 SCF Energy: -899.292763765  
 Num. Imaginary Frequencies: 1  
 Imaginary Frequency: -520.6853

|   |           |           |           |
|---|-----------|-----------|-----------|
| C | -1.039832 | -0.631304 | -0.450401 |
| N | -0.591752 | -1.801776 | -0.977812 |
| N | 0.730059  | -1.869604 | -0.813956 |
| C | -2.496687 | -0.510013 | -0.149591 |
| C | -3.047382 | -1.550080 | 0.612002  |
| C | -3.328993 | 0.535503  | -0.560619 |
| C | -4.394729 | -1.538387 | 0.963856  |
| H | -2.407152 | -2.368795 | 0.924593  |
| C | -4.677838 | 0.546594  | -0.208095 |
| H | -2.946915 | 1.354861  | -1.158973 |
| C | -5.215161 | -0.487161 | 0.556225  |
| H | -4.801920 | -2.352204 | 1.555255  |
| H | -5.307842 | 1.366397  | -0.537788 |
| H | -6.265619 | -0.475322 | 0.828495  |
| C | 0.225879  | 1.411558  | 0.836507  |
| H | 1.073538  | 1.321507  | 1.518623  |
| C | 0.100181  | 0.093545  | 0.098564  |
| C | 1.180618  | -0.792429 | -0.167410 |
| C | -0.429793 | 0.760499  | -1.690015 |
| H | -1.346266 | 0.576457  | -2.250621 |
| H | 0.418589  | 0.331287  | -2.218833 |
| C | -0.287837 | 2.236036  | -1.306829 |
| H | 0.109753  | 2.767065  | -2.177980 |

|   |           |           |           |
|---|-----------|-----------|-----------|
| H | -1.272283 | 2.662135  | -1.094576 |
| N | 0.576632  | 2.444440  | -0.158036 |
| C | -0.999031 | 1.816754  | 1.650667  |
| H | -0.752546 | 2.698774  | 2.245563  |
| H | -1.855239 | 2.059585  | 1.018423  |
| H | -1.299008 | 1.006931  | 2.321681  |
| C | 2.624013  | -0.583981 | 0.077128  |
| H | 1.546185  | 2.305060  | -0.438340 |
| C | 3.122702  | -0.323303 | 1.360371  |
| C | 4.488131  | -0.130782 | 1.563080  |
| C | 5.373488  | -0.204173 | 0.487483  |
| C | 4.888072  | -0.477180 | -0.791506 |
| C | 3.522212  | -0.664193 | -0.995407 |
| H | 2.443545  | -0.299667 | 2.208036  |
| H | 4.861350  | 0.064803  | 2.563410  |
| H | 6.436907  | -0.056420 | 0.646786  |
| H | 5.572549  | -0.542546 | -1.631459 |
| H | 3.139727  | -0.876346 | -1.989725 |

TS\_B\_E\_R1Ph\_R2Ph\_XNH\_Meax\_conf1-Heq  
 SCF Energy: -899.291148831  
 Num. Imaginary Frequencies: 1  
 Imaginary Frequency: -540.0290

|   |           |           |           |
|---|-----------|-----------|-----------|
| C | -0.993275 | -0.697382 | -0.468665 |
| N | -0.519825 | -1.877955 | -0.934865 |
| N | 0.807811  | -1.901627 | -0.762565 |
| C | -2.447257 | -0.562503 | -0.150451 |
| C | -2.855854 | -1.159069 | 1.050088  |
| C | -3.401693 | 0.067626  | -0.951361 |
| C | -4.186366 | -1.108278 | 1.453060  |
| H | -2.116910 | -1.661982 | 1.668174  |
| C | -4.736284 | 0.121313  | -0.545277 |
| H | -3.132363 | 0.524801  | -1.896965 |
| C | -5.131551 | -0.459911 | 0.656724  |
| H | -4.484771 | -1.574561 | 2.386510  |
| H | -5.466059 | 0.616600  | -1.177573 |
| H | -6.170042 | -0.415174 | 0.968596  |
| C | 0.159354  | 1.424920  | 0.749901  |
| H | 1.055161  | 1.432069  | 1.375748  |
| C | 0.122767  | 0.087549  | 0.043424  |
| C | 1.228398  | -0.785598 | -0.168091 |
| C | -0.423404 | 0.677980  | -1.756554 |
| H | -1.238671 | 0.316652  | -2.377428 |
| H | 0.530011  | 0.417296  | -2.208519 |
| C | -0.582986 | 2.132098  | -1.380688 |
| H | -0.355609 | 2.734259  | -2.267464 |
| H | -1.629755 | 2.328106  | -1.103593 |
| N | 0.371523  | 2.415697  | -0.323201 |
| C | -1.051666 | 1.709308  | 1.644148  |
| H | -0.889421 | 2.652372  | 2.173987  |
| H | -1.981370 | 1.786981  | 1.074560  |
| H | -1.179574 | 0.916653  | 2.387114  |
| C | 2.664166  | -0.534576 | 0.075597  |
| H | 0.260807  | 3.361064  | 0.035870  |
| C | 3.143372  | -0.179551 | 1.343145  |
| C | 4.503400  | 0.045605  | 1.547888  |
| C | 5.402998  | -0.088912 | 0.490181  |
| C | 4.936797  | -0.456277 | -0.772153 |
| C | 3.576321  | -0.676319 | -0.978126 |
| H | 2.453590  | -0.106886 | 2.179299  |
| H | 4.861563  | 0.315013  | 2.536556  |

|   |          |           |           |
|---|----------|-----------|-----------|
| H | 6.462314 | 0.084869  | 0.650876  |
| H | 5.632204 | -0.568841 | -1.598074 |
| H | 3.208912 | -0.960237 | -1.959997 |

TS\_B\_E\_R1Ph\_R2Ph\_XNH\_Meax\_conf1

SCF Energy: -899.292763765

Num. Imaginary Frequencies: 1

Imaginary Frequency: -520.6853

|   |           |           |           |
|---|-----------|-----------|-----------|
| C | -1.039832 | -0.631304 | -0.450401 |
| N | -0.591752 | -1.801776 | -0.977812 |
| N | 0.730059  | -1.869604 | -0.813956 |
| C | -2.496687 | -0.510013 | -0.149591 |
| C | -3.047382 | -1.550080 | 0.612002  |
| C | -3.328993 | 0.535503  | -0.560619 |
| C | -4.394729 | -1.538387 | 0.963856  |
| H | -2.407152 | -2.368795 | 0.924593  |
| C | -4.677838 | 0.546594  | -0.208095 |
| H | -2.946915 | 1.354861  | -1.158973 |
| C | -5.215161 | -0.487161 | 0.556225  |
| H | -4.801920 | -2.352204 | 1.555255  |
| H | -5.307842 | 1.366397  | -0.537788 |
| H | -6.265619 | -0.475322 | 0.828495  |
| C | 0.225879  | 1.411558  | 0.836507  |
| H | 1.073538  | 1.321507  | 1.518623  |
| C | 0.100181  | 0.093545  | 0.098564  |
| C | 1.180618  | -0.792429 | -0.167410 |
| C | -0.429793 | 0.760499  | -1.690015 |
| H | -1.346266 | 0.576457  | -2.250621 |
| H | 0.418589  | 0.331287  | -2.218833 |
| C | -0.287837 | 2.236036  | -1.306829 |
| H | 0.109753  | 2.767065  | -2.177980 |
| H | -1.272283 | 2.662135  | -1.094576 |
| N | 0.576632  | 2.444440  | -0.158036 |
| C | -0.999031 | 1.816754  | 1.650667  |
| H | -0.752546 | 2.698774  | 2.245563  |
| H | -1.855239 | 2.059585  | 1.018423  |
| H | -1.299008 | 1.006931  | 2.321681  |
| C | 2.624013  | -0.583981 | 0.077128  |
| H | 1.546185  | 2.305060  | -0.438340 |
| C | 3.122702  | -0.323303 | 1.360371  |
| C | 4.488131  | -0.130782 | 1.563080  |
| C | 5.373488  | -0.204173 | 0.487483  |
| C | 4.888072  | -0.477180 | -0.791506 |
| C | 3.522212  | -0.664193 | -0.995407 |
| H | 2.443545  | -0.299667 | 2.208036  |
| H | 4.861350  | 0.064803  | 2.563410  |
| H | 6.436907  | -0.056420 | 0.646786  |
| H | 5.572549  | -0.542546 | -1.631459 |
| H | 3.139727  | -0.876346 | -1.989725 |

TS\_B\_E\_R1Ph\_R2Ph\_XNH\_Meax

SCF Energy: -899.293985071

Num. Imaginary Frequencies: 1

Imaginary Frequency: -559.9267

|   |           |           |           |
|---|-----------|-----------|-----------|
| C | -0.979356 | -0.535456 | -0.637212 |
| N | -0.500527 | -1.595726 | -1.336540 |
| N | 0.826158  | -1.629025 | -1.199755 |
| C | -2.422187 | -0.530440 | -0.243178 |
| C | -2.753866 | -1.385844 | 0.816452  |

|   |           |           |           |
|---|-----------|-----------|-----------|
| C | -3.436727 | 0.201892  | -0.862499 |
| C | -4.066170 | -1.486454 | 1.266230  |
| H | -1.968975 | -1.970458 | 1.288792  |
| C | -4.753618 | 0.102547  | -0.409817 |
| H | -3.229147 | 0.856025  | -1.702165 |
| C | -5.071438 | -0.734411 | 0.656506  |
| H | -4.303624 | -2.151696 | 2.090135  |
| H | -5.530407 | 0.680200  | -0.900276 |
| H | -6.096294 | -0.807417 | 1.005887  |
| C | 0.153765  | 1.308279  | 0.986240  |
| H | 1.116538  | 1.262732  | 1.504164  |
| C | 0.140529  | 0.167286  | -0.020099 |
| C | 1.252101  | -0.626855 | -0.427106 |
| C | -0.537887 | 1.103596  | -1.597146 |
| H | -1.338333 | 0.832589  | -2.283165 |
| H | 0.411362  | 1.050126  | -2.126140 |
| C | -0.811700 | 2.410321  | -0.865098 |
| H | -0.699267 | 3.235518  | -1.575692 |
| H | -1.848183 | 2.422798  | -0.513237 |
| N | 0.081635  | 2.594942  | 0.265651  |
| C | -0.957501 | 1.229720  | 2.032081  |
| H | -0.788665 | 2.006739  | 2.780655  |
| H | -1.944377 | 1.385715  | 1.588245  |
| H | -0.959312 | 0.254197  | 2.526031  |
| C | 2.683187  | -0.475036 | -0.108627 |
| H | 1.003825  | 2.852799  | -0.075224 |
| C | 3.299865  | 0.779404  | -0.024478 |
| C | 4.657451  | 0.888338  | 0.273924  |
| C | 5.421724  | -0.257990 | 0.484066  |
| C | 4.819530  | -1.514327 | 0.390882  |
| C | 3.462730  | -1.622451 | 0.100964  |
| H | 2.727719  | 1.680400  | -0.222039 |
| H | 5.117573  | 1.869717  | 0.331647  |
| H | 6.478744  | -0.174430 | 0.715559  |
| H | 5.407883  | -2.412312 | 0.551941  |
| H | 2.989472  | -2.597284 | 0.036890  |

TS\_B\_E\_R1Ph\_R2Ph\_XNH\_Meeq

SCF Energy: -899.297646061

Num. Imaginary Frequencies: 1

Imaginary Frequency: -527.3962

|   |           |           |           |
|---|-----------|-----------|-----------|
| C | -1.125564 | -0.694053 | 0.304849  |
| N | -0.699604 | -1.908764 | 0.739735  |
| N | 0.628972  | -1.940900 | 0.651682  |
| C | -2.558890 | -0.499289 | -0.031752 |
| C | -2.939434 | -0.086729 | -1.312966 |
| C | -3.546453 | -0.809751 | 0.909887  |
| C | -4.289150 | 0.041292  | -1.637838 |
| H | -2.183071 | 0.108541  | -2.067275 |
| C | -4.894190 | -0.682229 | 0.584085  |
| H | -3.256955 | -1.166240 | 1.894876  |
| C | -5.267993 | -0.248572 | -0.688621 |
| H | -4.573592 | 0.359929  | -2.635435 |
| H | -5.652072 | -0.924643 | 1.321985  |
| H | -6.318417 | -0.147037 | -0.941814 |
| C | 0.026491  | 1.488473  | -0.712114 |
| H | -0.958602 | 1.636910  | -1.166784 |
| C | 0.029297  | 0.106654  | -0.076621 |
| C | 1.106923  | -0.785347 | 0.173425  |
| C | -0.811510 | 2.085819  | 1.378110  |
| H | -1.830597 | 2.292150  | 1.030603  |

|   |           |           |           |   |          |           |           |
|---|-----------|-----------|-----------|---|----------|-----------|-----------|
| H | -0.653780 | 2.656373  | 2.299346  | C | 3.315441 | -1.460308 | -0.754661 |
| C | -0.697825 | 0.603337  | 1.712498  | C | 4.693445 | -1.294568 | -0.883396 |
| H | 0.196149  | 0.296404  | 2.251654  | C | 5.338901 | -0.250070 | -0.221207 |
| H | -1.589916 | 0.246892  | 2.225585  | C | 4.601580 | 0.620187  | 0.582239  |
| N | 0.121411  | 2.504345  | 0.346755  | C | 3.224991 | 0.449583  | 0.714507  |
| C | 1.082607  | 1.688323  | -1.790867 | H | 2.807777 | -2.267365 | -1.274481 |
| H | 2.093353  | 1.663274  | -1.377299 | H | 5.262478 | -1.978416 | -1.505409 |
| H | 1.006648  | 0.907997  | -2.552428 | H | 6.411158 | -0.118226 | -0.325427 |
| H | 0.925047  | 2.659217  | -2.265646 | H | 5.098608 | 1.426164  | 1.112819  |
| C | 2.565867  | -0.584046 | 0.038206  | H | 2.662230 | 1.114075  | 1.365132  |
| H | 1.070897  | 2.518989  | 0.716209  |   |          |           |           |



R1Ph\_R2Me\_XNMs\_Me:

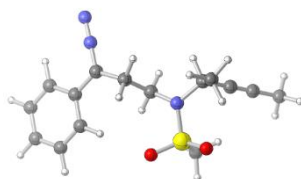

| FILE                        | SCF E       | SCF+ZPVE    | H           | TS         | G           |
|-----------------------------|-------------|-------------|-------------|------------|-------------|
| A_R1Ph_R2Me_XNMs_Me_conf14  | -812869.914 | -812666.559 | -812651.936 | 49.6968613 | -812701.632 |
| A_R1Ph_R2Me_XNMs_Me_conf16  | -812871.218 | -812667.565 | -812653.214 | 47.4208847 | -812700.634 |
| A_R1Ph_R2Me_XNMs_Me_conf2   | -812872.53  | -812668.552 | -812654.419 | 45.8251283 | -812700.244 |
| A_R1Ph_R2Me_XNMs_Me_conf27  | -812869.129 | -812665.711 | -812651.167 | 48.8365459 | -812700.004 |
| A_R1Ph_R2Me_XNMs_Me_conf20  | -812869.789 | -812666.127 | -812651.726 | 48.2573547 | -812699.983 |
| A_R1Ph_R2Me_XNMs_Me_conf1   | -812871.178 | -812667.544 | -812653.257 | 46.6917188 | -812699.948 |
| A_R1Ph_R2Me_XNMs_Me_conf4   | -812869.161 | -812665.675 | -812651.153 | 48.5842871 | -812699.737 |
| A_R1Ph_R2Me_XNMs_Me_conf11  | -812869.286 | -812665.72  | -812651.221 | 48.4368224 | -812699.658 |
| A_R1Ph_R2Me_XNMs_Me_conf24  | -812868.65  | -812665.052 | -812650.593 | 48.7129266 | -812699.306 |
| A_R1Ph_R2Me_XNMs_Me_conf9   | -812868.402 | -812664.869 | -812650.366 | 48.5491466 | -812698.915 |
| A_R1Ph_R2Me_XNMs_Me_conf23  | -812868.348 | -812664.619 | -812650.205 | 48.475728  | -812698.68  |
| A_R1Ph_R2Me_XNMs_Me_conf3   | -812870.217 | -812666.443 | -812652.217 | 46.2474422 | -812698.464 |
| A_R1Ph_R2Me_XNMs_Me_conf12  | -812867.475 | -812663.934 | -812649.392 | 48.9601653 | -812698.353 |
| A_R1Ph_R2Me_XNMs_Me_conf18  | -812869.031 | -812665.193 | -812650.864 | 47.4735955 | -812698.338 |
| A_R1Ph_R2Me_XNMs_Me_conf25  | -812868.338 | -812664.585 | -812650.194 | 48.074122  | -812698.268 |
| A_R1Ph_R2Me_XNMs_Me_conf6   | -812870.19  | -812666.498 | -812652.285 | 45.9669455 | -812698.252 |
| A_R1Ph_R2Me_XNMs_Me_conf15  | -812868.348 | -812664.582 | -812650.198 | 48.0000759 | -812698.199 |
| A_R1Ph_R2Me_XNMs_Me         | -812867.476 | -812663.931 | -812649.397 | 48.7857177 | -812698.183 |
| A_R1Ph_R2Me_XNMs_Me_conf8   | -812866.901 | -812663.522 | -812648.902 | 49.2563497 | -812698.159 |
| A_R1Ph_R2Me_XNMs_Me_conf5   | -812867.478 | -812663.895 | -812649.38  | 48.7141816 | -812698.095 |
| A_R1Ph_R2Me_XNMs_Me_conf17  | -812865.924 | -812662.645 | -812647.963 | 50.0526591 | -812698.015 |
| A_R1Ph_R2Me_XNMs_Me_conf7   | -812867.48  | -812663.887 | -812649.38  | 48.6294678 | -812698.01  |
| A_R1Ph_R2Me_XNMs_Me_conf10  | -812866.986 | -812663.53  | -812649.014 | 48.3596388 | -812697.374 |
| A_R1Ph_R2Me_XNMs_Me_conf13  | -812865.991 | -812662.771 | -812648.102 | 49.1509281 | -812697.252 |
| A_R1Ph_R2Me_XNMs_Me_conf22  | -812868.3   | -812664.697 | -812650.81  | 46.3798466 | -812697.19  |
| A_R1Ph_R2Me_XNMs_Me_conf21  | -812865.813 | -812662.369 | -812647.786 | 49.2061489 | -812696.992 |
| A_R1Ph_R2Me_XNMs_Me_conf19  | -812865.958 | -812662.79  | -812648.659 | 47.5495242 | -812696.208 |
| B_R1Ph_R2Me_XNMs_Meax_conf5 | -812920.887 | -812714.205 | -812701.554 | 42.4736007 | -812744.027 |
| B_R1Ph_R2Me_XNMs_Meax_conf2 | -812920.887 | -812714.202 | -812701.554 | 42.457913  | -812744.011 |
| B_R1Ph_R2Me_XNMs_Meax_conf3 | -812921.442 | -812714.547 | -812702     | 41.8661716 | -812743.866 |
| B_R1Ph_R2Me_XNMs_Meax       | -812921.442 | -812714.546 | -812701.999 | 41.8661716 | -812743.865 |
| B_R1Ph_R2Me_XNMs_Meax_conf1 | -812921.442 | -812714.546 | -812701.999 | 41.8655441 | -812743.864 |
| B_R1Ph_R2Me_XNMs_Meax_conf4 | -812921.442 | -812714.546 | -812701.999 | 41.8655441 | -812743.864 |
| B_R1Ph_R2Me_XNMs_Mee3_conf2 | -812918.747 | -812712.233 | -812699.439 | 42.9793733 | -812742.418 |
| B_R1Ph_R2Me_XNMs_Mee3_conf1 | -812918.747 | -812712.233 | -812699.439 | 42.9787457 | -812742.418 |

|                              |             |             |             |            |             |
|------------------------------|-------------|-------------|-------------|------------|-------------|
| B_R1Ph_R2Me_XNMs_Mee3_conf5  | -812918.217 | -812711.178 | -812698.673 | 42.2213419 | -812740.895 |
| B_R1Ph_R2Me_XNMs_Mee3_conf6  | -812918.557 | -812711.5   | -812699.044 | 41.7343946 | -812740.778 |
| B_R1Ph_R2Me_XNMs_Mee3_conf4  | -812917.28  | -812710.584 | -812697.908 | 42.4390877 | -812740.347 |
| B_R1Ph_R2Me_XNMs_Mee3_conf7  | -812917.153 | -812710.371 | -812697.713 | 42.359394  | -812740.073 |
| B_R1Ph_R2Me_XNMs_Mee3_conf3  | -812917.05  | -812710.673 | -812698.351 | 41.5373567 | -812739.888 |
| B_R1Ph_R2Me_XNMs_Meax_conf9  | -812916.336 | -812709.871 | -812697.143 | 42.6800513 | -812739.823 |
| B_R1Ph_R2Me_XNMs_Meax_conf6  | -812916.336 | -812709.869 | -812697.142 | 42.6775412 | -812739.819 |
| B_R1Ph_R2Me_XNMs_Meax_conf8  | -812916.336 | -812709.869 | -812697.142 | 42.6756587 | -812739.817 |
| B_R1Ph_R2Me_XNMs_Mee3_conf8  | -812916.368 | -812709.313 | -812696.793 | 42.0964675 | -812738.889 |
| B_R1Ph_R2Me_XNMs_Meec        | -812916.368 | -812709.311 | -812696.792 | 42.092075  | -812738.884 |
| B_R1Ph_R2Me_XNMs_Meax_conf7  | -812914.575 | -812708.081 | -812695.366 | 42.5689821 | -812737.935 |
| B_R1Ph_R2Me_XNMs_Mee3_conf9  | -812908.122 | -812701.441 | -812688.752 | 42.5187814 | -812731.271 |
| C_R1Ph_R2Me_XNMs_Mee3_conf3  | -812931.508 | -812724.602 | -812712.063 | 41.3032957 | -812753.366 |
| C_R1Ph_R2Me_XNMs_Mee3_conf5  | -812930.475 | -812723.727 | -812711.032 | 42.3267635 | -812753.358 |
| C_R1Ph_R2Me_XNMs_Mee3_conf7  | -812930.39  | -812723.663 | -812710.941 | 42.2878579 | -812753.229 |
| C_R1Ph_R2Me_XNMs_Mee3_conf6  | -812929.588 | -812722.786 | -812710.175 | 41.7450623 | -812751.92  |
| C_R1Ph_R2Me_XNMs_Mee3_conf4  | -812926.354 | -812719.856 | -812707.065 | 42.4001821 | -812749.465 |
| C_R1Ph_R2Me_XNMs_Mee3_conf2  | -812926.354 | -812719.855 | -812707.065 | 42.3982996 | -812749.464 |
| C_R1Ph_R2Me_XNMs_Meec        | -812926.401 | -812719.826 | -812707.125 | 42.1792988 | -812749.305 |
| C_R1Ph_R2Me_XNMs_Mee3_conf1  | -812926.401 | -812719.826 | -812707.126 | 42.1780438 | -812749.304 |
| C_R1Ph_R2Me_XNMs_Meax_conf6  | -812921.604 | -812714.864 | -812702.208 | 42.0261865 | -812744.234 |
| C_R1Ph_R2Me_XNMs_Meax_conf1  | -812921.604 | -812714.864 | -812702.209 | 42.0249315 | -812744.234 |
| C_R1Ph_R2Me_XNMs_Meax_conf7  | -812921.344 | -812714.526 | -812701.887 | 42.0738772 | -812743.961 |
| C_R1Ph_R2Me_XNMs_Meax        | -812921.344 | -812714.524 | -812701.887 | 42.0719947 | -812743.959 |
| C_R1Ph_R2Me_XNMs_Meax_conf5  | -812921.14  | -812714.139 | -812701.621 | 41.9985761 | -812743.62  |
| C_R1Ph_R2Me_XNMs_Meax_conf4  | -812920.307 | -812713.531 | -812700.838 | 42.4321851 | -812743.271 |
| C_R1Ph_R2Me_XNMs_Meax_conf2  | -812920.539 | -812713.72  | -812701.068 | 42.193104  | -812743.261 |
| C_R1Ph_R2Me_XNMs_Meax_conf3  | -812920.539 | -812713.722 | -812701.07  | 42.1887114 | -812743.259 |
| D_R1Ph_R2Me_XNMs_Mee3_conf14 | -812948.97  | -812741.756 | -812728.985 | 43.2987755 | -812772.284 |
| D_R1Ph_R2Me_XNMs_Mee3_conf3  | -812948.97  | -812741.756 | -812728.986 | 43.2975205 | -812772.283 |
| D_R1Ph_R2Me_XNMs_Meax_conf8  | -812948.97  | -812741.756 | -812728.985 | 43.2962655 | -812772.282 |
| D_R1Ph_R2Me_XNMs_Mee3_conf15 | -812948.97  | -812741.756 | -812728.986 | 43.2937555 | -812772.28  |
| D_R1Ph_R2Me_XNMs_Meax_conf11 | -812947.574 | -812740.308 | -812727.547 | 43.4669481 | -812771.014 |
| D_R1Ph_R2Me_XNMs_Meax        | -812947.574 | -812740.307 | -812727.546 | 43.4638105 | -812771.01  |
| D_R1Ph_R2Me_XNMs_Meax_conf5  | -812948.127 | -812740.761 | -812728.045 | 42.9404677 | -812770.986 |
| D_R1Ph_R2Me_XNMs_Meax_conf6  | -812948.127 | -812740.76  | -812728.045 | 42.9398402 | -812770.985 |
| D_R1Ph_R2Me_XNMs_Mee3_conf1  | -812948.127 | -812740.76  | -812728.045 | 42.9398402 | -812770.985 |
| D_R1Ph_R2Me_XNMs_Mee3_conf7  | -812948.127 | -812740.76  | -812728.045 | 42.9398402 | -812770.985 |
| D_R1Ph_R2Me_XNMs_Mee3_conf6  | -812948.127 | -812740.76  | -812728.045 | 42.9392127 | -812770.984 |
| D_R1Ph_R2Me_XNMs_Mee3_conf10 | -812948.127 | -812740.76  | -812728.045 | 42.9392127 | -812770.984 |
| D_R1Ph_R2Me_XNMs_Meax_conf1  | -812948.127 | -812740.76  | -812728.045 | 42.9392127 | -812770.984 |
| D_R1Ph_R2Me_XNMs_Meax_conf9  | -812948.149 | -812740.742 | -812728.077 | 42.7051517 | -812770.782 |
| D_R1Ph_R2Me_XNMs_Meax_conf10 | -812947.88  | -812740.488 | -812727.761 | 42.7616275 | -812770.522 |
| D_R1Ph_R2Me_XNMs_Mee3_conf5  | -812946.931 | -812739.781 | -812726.985 | 43.2479473 | -812770.233 |
| D_R1Ph_R2Me_XNMs_Meax_conf2  | -812946.931 | -812739.78  | -812726.984 | 43.2454372 | -812770.23  |

|                              |             |             |             |            |             |
|------------------------------|-------------|-------------|-------------|------------|-------------|
| D_R1Ph_R2Me_XNMs_Mee3_conf12 | -812946.931 | -812739.78  | -812726.984 | 43.2435547 | -812770.228 |
| D_R1Ph_R2Me_XNMs_Mee3_conf4  | -812946.425 | -812739.252 | -812726.434 | 43.5083637 | -812769.942 |
| D_R1Ph_R2Me_XNMs_Meax_conf4  | -812946.425 | -812739.251 | -812726.433 | 43.5077362 | -812769.941 |
| D_R1Ph_R2Me_XNMs_Meax_conf7  | -812946.745 | -812739.565 | -812726.73  | 43.2102967 | -812769.94  |
| D_R1Ph_R2Me_XNMs_Mee3_conf8  | -812946.745 | -812739.565 | -812726.73  | 43.2102967 | -812769.94  |
| D_R1Ph_R2Me_XNMs_Meax_conf3  | -812946.745 | -812739.565 | -812726.73  | 43.2096692 | -812769.94  |
| D_R1Ph_R2Me_XNMs_Mee3_conf2  | -812946.745 | -812739.565 | -812726.73  | 43.2096692 | -812769.94  |
| D_R1Ph_R2Me_XNMs_Mee3_conf9  | -812946.425 | -812739.251 | -812726.433 | 43.5039711 | -812769.937 |
| D_R1Ph_R2Me_XNMs_Mee3_conf11 | -812945.37  | -812738.076 | -812725.321 | 42.9461153 | -812768.268 |
| D_R1Ph_R2Me_XNMs_Mee3_conf13 | -812945.401 | -812737.902 | -812725.29  | 42.4177524 | -812767.708 |
| D_R1Ph_R2Me_XNMs_Meax_conf14 | -812943.77  | -812736.711 | -812723.825 | 43.7581124 | -812767.584 |
| D_R1Ph_R2Me_XNMs_Mee3_conf16 | -812943.77  | -812736.709 | -812723.825 | 43.7474448 | -812767.572 |
| D_R1Ph_R2Me_XNMs_Meax_conf13 | -812944.68  | -812736.984 | -812724.469 | 42.1416482 | -812766.611 |
| D_R1Ph_R2Me_XNMs_Meac        | -812943.695 | -812736.198 | -812723.562 | 42.6995041 | -812766.261 |
| D_R1Ph_R2Me_XNMs_Meax_conf12 | -812943.695 | -812736.196 | -812723.561 | 42.696994  | -812766.258 |
| D_R1Ph_R2Me_XNMs_Mee3_conf17 | -812943.695 | -812736.194 | -812723.559 | 42.6951115 | -812766.255 |
| E_R1Ph_R2Me_XNMs_Meax_conf9  | -812928.592 | -812721.763 | -812709.049 | 42.4899159 | -812751.538 |
| E_R1Ph_R2Me_XNMs_Meax_conf5  | -812927.697 | -812720.95  | -812708.169 | 42.7509598 | -812750.919 |
| E_R1Ph_R2Me_XNMs_Mee3_conf3  | -812927.289 | -812720.63  | -812707.876 | 42.9298    | -812750.805 |
| E_R1Ph_R2Me_XNMs_Meax_conf6  | -812927.333 | -812720.6   | -812707.821 | 42.8601465 | -812750.681 |
| E_R1Ph_R2Me_XNMs_Meax_conf4  | -812927.767 | -812720.871 | -812708.161 | 42.3920245 | -812750.553 |
| E_R1Ph_R2Me_XNMs_Meax_conf1  | -812925.742 | -812719.163 | -812706.283 | 43.9250299 | -812750.209 |
| E_R1Ph_R2Me_XNMs_Meax_conf3  | -812925.742 | -812719.161 | -812706.282 | 43.898047  | -812750.18  |
| E_R1Ph_R2Me_XNMs_Mee3_conf1  | -812926.093 | -812719.568 | -812706.679 | 43.0898149 | -812749.769 |
| E_R1Ph_R2Me_XNMs_Meax_conf8  | -812925.863 | -812719.028 | -812706.409 | 42.2715427 | -812748.681 |
| E_R1Ph_R2Me_XNMs_Mee3_conf2  | -812925.006 | -812718.538 | -812705.627 | 42.9894134 | -812748.617 |
| E_R1Ph_R2Me_XNMs_Meax_conf2  | -812925.257 | -812718.301 | -812705.654 | 42.3418237 | -812747.996 |
| TS_A_B_R1Ph_R2Me_XNMs_Meaxax | -812848.826 | -812645.057 | -812631.723 | 43.8484738 | -812675.572 |
| TS_A_B_R1Ph_R2Me_XNMs_Meaxec | -812848.841 | -812644.911 | -812631.721 | 43.3194833 | -812675.041 |
| TS_B_C_R1Ph_R2Me_XNMs_Meaxax | -812883.321 | -812677.474 | -812665.168 | 41.0290741 | -812706.197 |
| TS_B_C_R1Ph_R2Me_XNMs_Meaxec | -812888.517 | -812682.969 | -812670.516 | 41.6176779 | -812712.134 |
| TS_B_D_R1Ph_R2Me_XNMs_Meaxax | -812888.283 | -812683.013 | -812670.485 | 42.294133  | -812712.78  |
| TS_B_D_R1Ph_R2Me_XNMs_Meaxec | -812885.32  | -812680.331 | -812667.647 | 42.6831888 | -812710.33  |
| TS_B_E_R1Ph_R2Me_XNMs_Meaxax | -812887.414 | -812681.86  | -812669.398 | 42.1717687 | -812711.57  |
| TS_B_E_R1Ph_R2Me_XNMs_Meaxec | -812885.879 | -812680.001 | -812667.67  | 41.1470458 | -812708.817 |

A\_R1Ph\_R2Me\_XNMs\_Me\_conf14  
 SCF Energy: -1295.39083291  
 Num. Imaginary Frequencies: 0

|   |           |           |           |
|---|-----------|-----------|-----------|
| C | 2.223079  | 1.345079  | -0.286150 |
| N | 2.579401  | 2.573391  | -0.056414 |
| N | 2.912036  | 3.644814  | 0.142482  |
| C | 3.175041  | 0.278361  | 0.042642  |
| C | 2.830905  | -1.061278 | -0.210093 |
| C | 4.435258  | 0.553793  | 0.602730  |
| C | 3.726433  | -2.086357 | 0.087660  |
| H | 1.863669  | -1.313443 | -0.636148 |
| C | 5.321521  | -0.477132 | 0.895828  |
| H | 4.728259  | 1.579375  | 0.810084  |
| C | 4.974816  | -1.805093 | 0.640834  |
| H | 3.440172  | -3.113606 | -0.116528 |
| H | 6.289550  | -0.239775 | 1.326237  |
| H | 5.667956  | -2.607486 | 0.870760  |
| C | -2.486007 | 1.201192  | -0.484659 |
| H | -1.979921 | 2.132436  | -0.206941 |
| C | -3.550376 | 0.965797  | 0.508852  |
| C | -4.439812 | 0.787222  | 1.309059  |
| C | 0.849354  | 1.108137  | -0.856570 |
| H | 0.911114  | 0.376730  | -1.670055 |
| H | 0.460159  | 2.035461  | -1.288471 |
| C | -0.130781 | 0.576732  | 0.197176  |
| H | 0.311324  | -0.287722 | 0.700178  |
| H | -0.324495 | 1.330993  | 0.967310  |
| N | -1.404284 | 0.191418  | -0.423837 |
| C | -3.046218 | 1.389940  | -1.897626 |
| H | -2.219748 | 1.566435  | -2.590834 |
| H | -3.600500 | 0.507960  | -2.216033 |
| H | -3.711014 | 2.257251  | -1.905709 |
| C | -5.508466 | 0.554456  | 2.282298  |
| H | -6.468079 | 0.422957  | 1.777194  |
| H | -5.303632 | -0.346222 | 2.867196  |
| H | -5.593244 | 1.397314  | 2.972136  |
| S | -1.713415 | -1.424961 | -0.537874 |
| O | -2.901270 | -1.594538 | -1.369518 |
| O | -0.453512 | -2.053429 | -0.940034 |
| C | -2.096040 | -2.023057 | 1.098695  |
| H | -3.010903 | -1.533202 | 1.430430  |
| H | -2.231501 | -3.102091 | 1.013036  |
| H | -1.258591 | -1.794366 | 1.758900  |

B\_R1Ph\_R2Me\_XNMs\_Meax\_conf5  
 SCF Energy: -1295.47206414  
 Num. Imaginary Frequencies: 0

|   |          |           |           |
|---|----------|-----------|-----------|
| C | 0.909436 | 0.434321  | -0.829092 |
| N | 1.181874 | 1.662636  | -1.618537 |
| N | 0.582865 | 2.636250  | -1.115480 |
| C | 2.251372 | -0.118521 | -0.349277 |
| C | 2.983127 | 0.636645  | 0.575972  |
| C | 2.784548 | -1.324385 | -0.805051 |
| C | 4.213727 | 0.190500  | 1.045540  |
| H | 2.578120 | 1.580138  | 0.934871  |
| C | 4.017065 | -1.778475 | -0.328438 |
| H | 2.252121 | -1.931037 | -1.529481 |
| C | 4.733231 | -1.026247 | 0.597848  |
| H | 4.766276 | 0.789288  | 1.762622  |
| H | 4.413190 | -2.722807 | -0.688108 |

|   |           |           |           |
|---|-----------|-----------|-----------|
| H | 5.690028  | -1.380861 | 0.967490  |
| C | -0.707201 | -0.024150 | 1.167417  |
| H | -1.475015 | 0.525734  | 1.718790  |
| C | 0.011623  | 0.932714  | 0.263804  |
| C | -0.176976 | 2.241354  | 0.045439  |
| C | 0.061050  | -0.533410 | -1.678518 |
| H | 0.655615  | -0.995768 | -2.470149 |
| H | -0.733274 | 0.045759  | -2.162804 |
| C | -0.572340 | -1.598033 | -0.771963 |
| H | -1.196471 | -2.272293 | -1.357196 |
| H | 0.196180  | -2.200644 | -0.278854 |
| N | -1.402873 | -1.018871 | 0.299180  |
| C | 0.184014  | -0.748916 | 2.175389  |
| H | -0.432695 | -1.392776 | 2.806996  |
| H | 0.946873  | -1.358480 | 1.685372  |
| H | 0.695842  | -0.015132 | 2.803882  |
| C | -1.032462 | 3.259412  | 0.712065  |
| H | -1.779559 | 3.637950  | 0.008338  |
| H | -1.553901 | 2.831744  | 1.569680  |
| H | -0.428302 | 4.105751  | 1.051640  |
| S | -2.977308 | -0.610187 | -0.104441 |
| C | -3.893539 | -1.217963 | 1.293700  |
| O | -3.145713 | 0.843919  | -0.148093 |
| O | -3.338648 | -1.395131 | -1.284229 |
| H | -4.936759 | -0.946560 | 1.127261  |
| H | -3.765474 | -2.298441 | 1.337460  |
| H | -3.514104 | -0.738063 | 2.196663  |

B\_R1Ph\_R2Me\_XNMs\_Mee3\_conf2  
 SCF Energy: -1295.46865427  
 Num. Imaginary Frequencies: 0

|   |           |           |           |
|---|-----------|-----------|-----------|
| C | 1.274076  | -0.642325 | 0.749188  |
| N | 2.573238  | -1.326166 | 0.943293  |
| N | 3.450572  | -0.768212 | 0.250255  |
| C | 0.272513  | -1.662469 | 0.212725  |
| C | 0.220185  | -1.923082 | -1.161704 |
| C | -0.560164 | -2.385830 | 1.069740  |
| C | -0.660508 | -2.874786 | -1.670793 |
| H | 0.869143  | -1.374218 | -1.838888 |
| C | -1.447932 | -3.334373 | 0.559700  |
| H | -0.527281 | -2.220082 | 2.141932  |
| C | -1.504796 | -3.578486 | -0.811086 |
| H | -0.691256 | -3.061084 | -2.739680 |
| H | -2.093924 | -3.882181 | 1.238475  |
| H | -2.197487 | -4.314297 | -1.206628 |
| C | 0.586077  | 1.533362  | -0.464048 |
| H | 0.266325  | 1.489629  | -1.510389 |
| C | 1.608581  | 0.466153  | -0.195560 |
| C | 2.916829  | 0.362469  | -0.471151 |
| C | -0.451936 | 0.871433  | 1.784539  |
| H | -1.325044 | 0.277295  | 2.068991  |
| H | -0.459527 | 1.776047  | 2.401156  |
| C | 0.833480  | 0.059424  | 2.045423  |
| H | 1.649494  | 0.719197  | 2.355391  |
| H | 0.671481  | -0.652428 | 2.857198  |
| N | -0.594361 | 1.204423  | 0.356289  |
| C | 1.105636  | 2.939953  | -0.151638 |
| H | 1.981981  | 3.176179  | -0.759482 |
| H | 0.322535  | 3.672041  | -0.362336 |
| H | 1.389310  | 3.014159  | 0.902800  |
| C | 3.854089  | 1.165585  | -1.308228 |

|   |           |           |           |
|---|-----------|-----------|-----------|
| H | 4.464929  | 1.829854  | -0.688531 |
| H | 4.531409  | 0.496263  | -1.845085 |
| H | 3.313864  | 1.770112  | -2.038583 |
| S | -2.109450 | 1.517360  | -0.202864 |
| O | -2.880553 | 2.144001  | 0.871422  |
| O | -1.964654 | 2.212897  | -1.481918 |
| C | -2.835127 | -0.078135 | -0.515741 |
| H | -3.860208 | 0.096313  | -0.845516 |
| H | -2.245079 | -0.573481 | -1.287723 |
| H | -2.819980 | -0.655926 | 0.409633  |

C\_R1Ph\_R2Me\_XNMs\_Meax\_conf6

SCF Energy: -1295.47320737

Num. Imaginary Frequencies: 0

|   |           |           |           |
|---|-----------|-----------|-----------|
| C | 0.094974  | 0.392500  | 1.478407  |
| N | -0.273805 | -0.495912 | 2.325159  |
| N | -0.037754 | -1.791290 | 1.761696  |
| C | 2.113245  | 0.017249  | -0.033785 |
| C | 2.712602  | -0.470733 | -1.202627 |
| C | 2.914021  | 0.656144  | 0.916499  |
| C | 4.077234  | -0.312079 | -1.421107 |
| H | 2.108311  | -0.972510 | -1.954784 |
| C | 4.283844  | 0.816035  | 0.697752  |
| H | 2.477995  | 1.029390  | 1.838459  |
| C | 4.868761  | 0.334806  | -0.469912 |
| H | 4.522609  | -0.693546 | -2.334289 |
| H | 4.889293  | 1.317120  | 1.446152  |
| H | 5.933179  | 0.459727  | -0.640028 |
| C | -0.300037 | 0.360191  | -0.963740 |
| H | -0.534964 | -0.445144 | -1.662778 |
| C | 0.618877  | -0.197726 | 0.196397  |
| C | 0.398098  | -1.659449 | 0.558451  |
| C | -0.317143 | 1.820510  | 1.532924  |
| H | 0.499555  | 2.471933  | 1.208677  |
| H | -0.611680 | 2.104013  | 2.544257  |
| C | -1.530777 | 1.943433  | 0.558379  |
| H | -2.462181 | 1.946065  | 1.126371  |
| H | -1.484134 | 2.883060  | 0.000405  |
| N | -1.571227 | 0.809558  | -0.380811 |
| C | 0.311565  | 1.527309  | -1.744910 |
| H | 0.677268  | 2.319271  | -1.084572 |
| H | 1.148887  | 1.198706  | -2.359262 |
| H | -0.459922 | 1.941479  | -2.398056 |
| C | 0.695477  | -2.834875 | -0.309363 |
| H | 1.773283  | -2.939855 | -0.463711 |
| H | 0.316607  | -3.740468 | 0.165637  |
| H | 0.226164  | -2.722944 | -1.292229 |
| S | -2.974467 | -0.032321 | -0.571927 |
| O | -4.060323 | 0.945887  | -0.615935 |
| O | -2.767708 | -0.938705 | -1.700950 |
| C | -3.232880 | -1.017371 | 0.891072  |
| H | -4.219620 | -1.471254 | 0.787928  |
| H | -2.452323 | -1.775851 | 0.946458  |
| H | -3.200284 | -0.361674 | 1.762344  |

C\_R1Ph\_R2Me\_XNMs\_Mee3\_conf3

SCF Energy: -1295.48898918

Num. Imaginary Frequencies: 0

|   |           |           |          |
|---|-----------|-----------|----------|
| C | -1.209392 | -1.195632 | 1.221039 |
|---|-----------|-----------|----------|

|   |           |           |           |
|---|-----------|-----------|-----------|
| N | -2.327989 | -1.806091 | 1.371767  |
| N | -3.163864 | -1.518240 | 0.245517  |
| C | -0.931925 | 1.055670  | 0.043499  |
| C | -0.553778 | 1.822995  | -1.065238 |
| C | -1.165094 | 1.705086  | 1.261046  |
| C | -0.373020 | 3.199821  | -0.947113 |
| H | -0.383285 | 1.356694  | -2.030623 |
| C | -0.980375 | 3.082046  | 1.381334  |
| H | -1.492834 | 1.136840  | 2.127016  |
| C | -0.573180 | 3.832709  | 0.279715  |
| H | -0.068445 | 3.774994  | -1.815415 |
| H | -1.154471 | 3.564554  | 2.337615  |
| H | -0.420621 | 4.902915  | 0.373429  |
| C | 0.022620  | -1.141508 | -0.893794 |
| H | 0.262706  | -0.543127 | -1.772065 |
| C | -1.132309 | -0.449521 | -0.084594 |
| C | -2.518832 | -0.779935 | -0.587775 |
| C | 1.144695  | -1.892463 | 1.218443  |
| H | 2.101965  | -1.810792 | 1.735672  |
| H | 0.985187  | -2.953412 | 1.002128  |
| C | -0.009548 | -1.353781 | 2.090670  |
| H | -0.222541 | -2.039747 | 2.913238  |
| H | 0.278929  | -0.382195 | 2.508730  |
| N | 1.224486  | -1.164750 | -0.050533 |
| C | -0.338464 | -2.553527 | -1.355778 |
| H | 0.551310  | -3.033534 | -1.768569 |
| H | -0.729071 | -3.173593 | -0.543382 |
| H | -1.100706 | -2.508311 | -2.137218 |
| C | -3.100134 | -0.290414 | -1.869061 |
| H | -4.078357 | -0.743345 | -2.033016 |
| H | -3.206966 | 0.798722  | -1.843326 |
| H | -2.443657 | -0.532898 | -2.711879 |
| S | 2.526315  | -0.191023 | -0.345424 |
| O | 2.379605  | 0.300353  | -1.713906 |
| C | 2.452349  | 1.200347  | 0.770255  |
| O | 3.721258  | -0.947117 | 0.026417  |
| H | 2.391972  | 0.820436  | 1.791374  |
| H | 3.382544  | 1.753167  | 0.629567  |
| H | 1.588289  | 1.815334  | 0.520266  |

D\_R1Ph\_R2Me\_XNMs\_Meax\_conf8

SCF Energy: -1295.51681735

Num. Imaginary Frequencies: 0

|   |           |           |           |
|---|-----------|-----------|-----------|
| C | -0.396686 | 0.176245  | -0.265308 |
| N | -1.616065 | 0.607548  | 0.163658  |
| N | -1.561735 | 1.875925  | 0.633918  |
| C | -2.862766 | -0.069883 | 0.103008  |
| C | -4.004973 | 0.642280  | -0.267424 |
| C | -2.940732 | -1.426488 | 0.418077  |
| C | -5.229858 | -0.016189 | -0.329192 |
| H | -3.919357 | 1.697455  | -0.501157 |
| C | -4.169702 | -2.079065 | 0.335536  |
| H | -2.057677 | -1.962386 | 0.748234  |
| C | -5.315785 | -1.378250 | -0.036562 |
| H | -6.118686 | 0.536153  | -0.616456 |
| H | -4.229942 | -3.134541 | 0.579896  |
| H | -6.271606 | -1.888464 | -0.093109 |
| C | 1.943657  | 1.159645  | -0.410966 |
| H | 2.556682  | 1.424640  | 0.458195  |
| C | 0.484685  | 1.214174  | -0.050069 |
| C | -0.296181 | 2.256339  | 0.511839  |

|   |           |           |           |
|---|-----------|-----------|-----------|
| C | -0.054767 | -1.122125 | -0.924383 |
| H | -0.811504 | -1.401001 | -1.665461 |
| H | -0.002558 | -1.945569 | -0.203002 |
| C | 1.305641  | -0.942616 | -1.613461 |
| H | 1.731880  | -1.901172 | -1.905576 |
| H | 1.185240  | -0.339264 | -2.517514 |
| N | 2.291280  | -0.235109 | -0.779583 |
| C | 2.321152  | 2.111456  | -1.546532 |
| H | 3.393287  | 2.047829  | -1.745502 |
| H | 1.770467  | 1.868599  | -2.459377 |
| H | 2.073087  | 3.138745  | -1.266096 |
| C | 0.147807  | 3.618596  | 0.942576  |
| H | -0.604945 | 4.069497  | 1.591625  |
| H | 1.095044  | 3.566412  | 1.487296  |
| H | 0.295599  | 4.277061  | 0.080924  |
| S | 3.147925  | -1.099985 | 0.343276  |
| C | 2.170624  | -1.218013 | 1.834746  |
| O | 3.316095  | -2.446321 | -0.201049 |
| O | 4.328403  | -0.305818 | 0.679442  |
| H | 2.796212  | -1.715259 | 2.577555  |
| H | 1.911847  | -0.210915 | 2.164789  |
| H | 1.277084  | -1.806119 | 1.627920  |

D\_R1Ph\_R2Me\_XNMs\_Mee3\_conf14  
 SCF Energy: -1295.51681736  
 Num. Imaginary Frequencies: 0

|   |           |           |           |
|---|-----------|-----------|-----------|
| C | -0.396603 | 0.176206  | -0.265146 |
| N | -1.615961 | 0.607507  | 0.163855  |
| N | -1.561645 | 1.875911  | 0.634051  |
| C | -2.862676 | -0.069873 | 0.103111  |
| C | -2.940669 | -1.426508 | 0.418050  |
| C | -4.004857 | 0.642335  | -0.267312 |
| C | -4.169640 | -2.079065 | 0.335393  |
| H | -2.057625 | -1.962440 | 0.748184  |
| C | -5.229747 | -0.016117 | -0.329189 |
| H | -3.919218 | 1.697527  | -0.500955 |
| C | -5.315699 | -1.378203 | -0.036688 |
| H | -4.229901 | -3.134565 | 0.579647  |
| H | -6.118556 | 0.536260  | -0.616444 |
| H | -6.271522 | -1.888403 | -0.093326 |
| C | 1.943691  | 1.159634  | -0.411071 |
| H | 2.556827  | 1.424677  | 0.457998  |
| C | 0.484748  | 1.214151  | -0.050017 |
| C | -0.296102 | 2.256322  | 0.511920  |
| C | 1.305566  | -0.942631 | -1.613502 |
| H | 1.731794  | -1.901181 | -1.905654 |
| H | 1.185110  | -0.339267 | -2.517539 |
| C | -0.054790 | -1.122133 | -0.924328 |
| H | -0.811602 | -1.400890 | -1.665375 |
| H | -0.002588 | -1.945651 | -0.203028 |
| N | 2.291301  | -0.235108 | -0.779680 |
| C | 2.321006  | 2.111394  | -1.546739 |
| H | 3.393099  | 2.047729  | -1.745919 |
| H | 1.770139  | 1.868530  | -2.459472 |
| H | 2.073033  | 3.138701  | -1.266289 |
| C | 0.147892  | 3.618656  | 0.942430  |
| H | 0.295511  | 4.277017  | 0.080669  |
| H | -0.604828 | 4.069575  | 1.591504  |
| H | 1.095191  | 3.566640  | 1.487052  |
| S | 3.147817  | -1.100013 | 0.343298  |
| C | 2.170541  | -1.217691 | 1.834805  |

|   |          |           |           |
|---|----------|-----------|-----------|
| O | 3.315698 | -2.446444 | -0.200866 |
| O | 4.328463 | -0.306045 | 0.679345  |
| H | 1.276623 | -1.805192 | 1.627917  |
| H | 2.795884 | -1.715479 | 2.577458  |
| H | 1.912426 | -0.210508 | 2.165089  |

E\_R1Ph\_R2Me\_XNMs\_Meax\_conf9  
 SCF Energy: -1295.48434316  
 Num. Imaginary Frequencies: 0

|   |           |           |           |
|---|-----------|-----------|-----------|
| C | -1.669076 | 1.021010  | -0.090966 |
| N | -2.322945 | 2.058434  | -0.492546 |
| N | -1.484460 | 3.203441  | -0.451439 |
| C | -2.330224 | -0.294644 | 0.021264  |
| C | -3.708577 | -0.391120 | -0.231438 |
| C | -1.623559 | -1.451464 | 0.376700  |
| C | -4.359003 | -1.615194 | -0.134663 |
| H | -4.257550 | 0.503975  | -0.502442 |
| C | -2.280818 | -2.677790 | 0.474030  |
| H | -0.555969 | -1.401757 | 0.567480  |
| C | -3.647352 | -2.764443 | 0.219319  |
| H | -5.424236 | -1.674871 | -0.333618 |
| H | -1.719942 | -3.565273 | 0.749726  |
| H | -4.157539 | -3.719320 | 0.296577  |
| C | 0.890280  | 0.720368  | -0.573975 |
| H | 1.668003  | 1.480628  | -0.730762 |
| C | -0.241352 | 1.382560  | 0.276030  |
| C | -0.322898 | 2.860125  | -0.022115 |
| C | 0.131193  | 1.054820  | 1.754507  |
| H | -0.611565 | 0.376168  | 2.178341  |
| H | 0.160496  | 1.950144  | 2.378483  |
| C | 1.497960  | 0.370203  | 1.680739  |
| H | 2.311457  | 1.107912  | 1.710976  |
| H | 1.655008  | -0.364498 | 2.468907  |
| N | 1.435346  | -0.293781 | 0.360331  |
| C | 0.451030  | 0.195360  | -1.930485 |
| H | -0.073804 | 0.993841  | -2.464377 |
| H | 1.317033  | -0.088122 | -2.533075 |
| H | -0.227449 | -0.656513 | -1.835827 |
| C | 0.794697  | 3.831887  | 0.149747  |
| H | 1.274219  | 3.708230  | 1.125808  |
| H | 1.564124  | 3.683704  | -0.614823 |
| H | 0.412600  | 4.849543  | 0.063717  |
| S | 2.836710  | -1.088020 | -0.110257 |
| O | 3.569713  | -0.284477 | -1.090747 |
| O | 3.517404  | -1.495280 | 1.117647  |
| C | 2.222589  | -2.547561 | -0.916673 |
| H | 3.100123  | -3.114457 | -1.231458 |
| H | 1.631788  | -3.107348 | -0.192363 |
| H | 1.623980  | -2.256961 | -1.778890 |

E\_R1Ph\_R2Me\_XNMs\_Mee3\_conf3  
 SCF Energy: -1295.48226704  
 Num. Imaginary Frequencies: 0

|   |           |           |           |
|---|-----------|-----------|-----------|
| C | -1.631639 | 1.180612  | -0.090346 |
| N | -2.025407 | 2.328136  | 0.336440  |
| N | -0.928133 | 3.240202  | 0.319886  |
| C | -2.527902 | 0.004467  | -0.096650 |
| C | -2.736531 | -0.758484 | -1.252319 |
| C | -3.184302 | -0.349862 | 1.089168  |

|   |           |           |           |
|---|-----------|-----------|-----------|
| C | -3.585600 | -1.863145 | -1.217844 |
| H | -2.271681 | -0.470765 | -2.189516 |
| C | -4.026975 | -1.458477 | 1.121502  |
| H | -3.025120 | 0.248144  | 1.981415  |
| C | -4.226006 | -2.218786 | -0.030900 |
| H | -3.752298 | -2.440853 | -2.121201 |
| H | -4.527927 | -1.727494 | 2.045799  |
| H | -4.883426 | -3.081928 | -0.006125 |
| C | 0.587000  | 0.205241  | 0.579150  |
| H | 0.016571  | -0.736956 | 0.571286  |
| C | -0.151325 | 1.175144  | -0.388753 |
| C | 0.126881  | 2.628995  | -0.087434 |
| C | 1.826683  | 0.404472  | -1.535980 |
| H | 2.184236  | -0.396027 | -2.187935 |
| H | 2.468157  | 1.272147  | -1.702255 |
| C | 0.345029  | 0.708192  | -1.768074 |
| H | 0.179729  | 1.448949  | -2.553018 |
| H | -0.172224 | -0.214607 | -2.042131 |
| N | 1.895249  | 0.019335  | -0.102419 |
| C | 0.702232  | 0.713794  | 2.008694  |
| H | -0.287292 | 1.016614  | 2.367866  |
| H | 1.089617  | -0.066858 | 2.662117  |
| H | 1.372976  | 1.574952  | 2.061389  |
| C | 1.437288  | 3.322925  | -0.247876 |
| H | 1.386103  | 4.312235  | 0.208138  |
| H | 2.247567  | 2.747084  | 0.209673  |
| H | 1.673512  | 3.441464  | -1.311176 |
| S | 2.782903  | -1.333131 | 0.252912  |
| O | 4.049953  | -1.191582 | -0.459001 |
| O | 2.777083  | -1.488084 | 1.704179  |
| C | 1.921680  | -2.734818 | -0.443536 |
| H | 2.530967  | -3.611990 | -0.221460 |
| H | 0.944035  | -2.822742 | 0.030617  |
| H | 1.832734  | -2.599265 | -1.521657 |

TS\_A\_B\_R1Ph\_R2Me\_XNMs\_Meaxax  
 SCF Energy: -1295.35722753  
 Num. Imaginary Frequencies: 1  
 Imaginary Frequency: -477.3918

|   |           |           |           |
|---|-----------|-----------|-----------|
| C | 0.977379  | 0.241434  | -1.054588 |
| N | 1.102571  | 1.441384  | -1.646239 |
| N | 0.910507  | 2.571217  | -1.512960 |
| C | 2.261102  | -0.283844 | -0.506035 |
| C | 3.105227  | 0.570459  | 0.219747  |
| C | 2.626540  | -1.626505 | -0.657644 |
| C | 4.277525  | 0.088981  | 0.790455  |
| H | 2.824184  | 1.612187  | 0.351380  |
| C | 3.798977  | -2.109987 | -0.075992 |
| H | 2.003638  | -2.305543 | -1.231049 |
| C | 4.626301  | -1.256994 | 0.650789  |
| H | 4.917405  | 0.761356  | 1.353074  |
| H | 4.065895  | -3.154844 | -0.198993 |
| H | 5.537822  | -1.634320 | 1.102888  |
| C | -0.783891 | 0.051379  | 1.337983  |
| H | -1.553592 | 0.428492  | 2.014720  |
| C | -0.207835 | 1.226172  | 0.626293  |
| C | -0.127834 | 2.450396  | 0.442250  |
| C | -0.049978 | -0.684559 | -1.664139 |
| H | 0.398435  | -1.336436 | -2.425467 |
| H | -0.822601 | -0.087227 | -2.153711 |
| C | -0.716047 | -1.577060 | -0.605150 |

|   |           |           |           |
|---|-----------|-----------|-----------|
| H | -1.379015 | -2.277856 | -1.118807 |
| H | 0.023363  | -2.182857 | -0.074756 |
| N | -1.495576 | -0.870753 | 0.417461  |
| C | 0.228386  | -0.724953 | 2.180781  |
| H | -0.280423 | -1.539439 | 2.703071  |
| H | 1.046543  | -1.135817 | 1.587040  |
| H | 0.662922  | -0.046169 | 2.918648  |
| C | -0.294794 | 3.899922  | 0.645576  |
| H | -0.844973 | 4.339419  | -0.190937 |
| H | -0.841464 | 4.107241  | 1.570049  |
| H | 0.676773  | 4.400083  | 0.694118  |
| S | -3.055187 | -0.474363 | -0.015324 |
| C | -3.955977 | -1.978264 | 0.296896  |
| O | -3.531903 | 0.544983  | 0.918242  |
| O | -3.138499 | -0.207514 | -1.453801 |
| H | -4.987912 | -1.791090 | -0.002740 |
| H | -3.527324 | -2.782237 | -0.301482 |
| H | -3.886455 | -2.197290 | 1.361437  |

TS\_A\_B\_R1Ph\_R2Me\_XNMs\_Meaxec  
 SCF Energy: -1295.35725092  
 Num. Imaginary Frequencies: 1  
 Imaginary Frequency: -474.0086

|   |           |           |           |
|---|-----------|-----------|-----------|
| C | -1.062302 | 0.105780  | -1.091910 |
| N | -1.133685 | 1.260923  | -1.775492 |
| N | -0.861623 | 2.381432  | -1.742278 |
| C | -2.334540 | -0.283058 | -0.417817 |
| C | -3.081738 | 0.688163  | 0.267277  |
| C | -2.791311 | -1.606420 | -0.422667 |
| C | -4.252926 | 0.341751  | 0.931011  |
| H | -2.732319 | 1.717040  | 0.284060  |
| C | -3.962114 | -1.953499 | 0.252159  |
| H | -2.248517 | -2.375082 | -0.963087 |
| C | -4.695863 | -0.983283 | 0.930230  |
| H | -4.818906 | 1.104863  | 1.455710  |
| H | -4.301502 | -2.984259 | 0.238259  |
| H | -5.607418 | -1.254245 | 1.453019  |
| C | 0.593533  | -0.111149 | 1.249223  |
| H | -0.305617 | -0.677060 | 1.525101  |
| C | 0.182521  | 1.098602  | 0.484496  |
| C | 0.209040  | 2.312720  | 0.236995  |
| C | 0.521430  | -1.800669 | -0.577491 |
| H | -0.236776 | -2.319977 | 0.015346  |
| H | 1.142748  | -2.559364 | -1.050044 |
| C | -0.134018 | -0.941149 | -1.668490 |
| H | 0.643790  | -0.442346 | -2.255623 |
| H | -0.664434 | -1.612773 | -2.355928 |
| N | 1.344889  | -1.070325 | 0.394314  |
| C | 1.314716  | 0.261803  | 2.544468  |
| H | 2.175080  | 0.908429  | 2.361801  |
| H | 0.606479  | 0.802836  | 3.176001  |
| H | 1.655865  | -0.635765 | 3.064120  |
| C | 0.507584  | 3.750477  | 0.343905  |
| H | 1.143132  | 4.065527  | -0.489482 |
| H | -0.408707 | 4.345183  | 0.293853  |
| H | 1.023500  | 3.979115  | 1.281384  |
| S | 2.943797  | -0.805617 | 0.015351  |
| O | 3.715213  | -0.810781 | 1.256067  |
| O | 3.281528  | -1.783664 | -1.020136 |
| C | 3.131199  | 0.821143  | -0.696286 |
| H | 2.894887  | 1.568614  | 0.060356  |

H 4.177934 0.886949 -0.998441  
H 2.467767 0.916277 -1.555904

TS\_B\_C\_R1Ph\_R2Me\_XNMs\_Meaxax  
SCF Energy: -1295.41219868  
Num. Imaginary Frequencies: 1  
Imaginary Frequency: -570.2854

C 0.474230 0.193524 -1.158978  
N 0.660622 1.322146 -1.909483  
N 0.668621 2.364010 -1.083896  
C 1.969814 -0.151339 -0.214939  
C 3.032429 0.761681 -0.126072  
C 2.236082 -1.513675 -0.069971  
C 4.324573 0.311481 0.093861  
H 2.852340 1.826123 -0.233294  
C 3.539662 -1.958714 0.164807  
H 1.457044 -2.256081 -0.166596  
C 4.588671 -1.053621 0.250422  
H 5.130738 1.035026 0.156576  
H 3.719969 -3.023696 0.267760  
H 5.600185 -1.399086 0.435080  
C -0.543802 -0.205587 1.212268  
H -1.081387 0.549086 1.790018  
C 0.311942 0.577787 0.234839  
C 0.439160 1.989864 0.182199  
C -0.182682 -1.039238 -1.724698  
H 0.537011 -1.733674 -2.166851  
H -0.837010 -0.682026 -2.521606  
C -1.038281 -1.779276 -0.660319  
H -1.874183 -2.273168 -1.159937  
H -0.474752 -2.575178 -0.168907  
N -1.570188 -0.934946 0.424454  
C 0.126737 -1.131501 2.224336  
H -0.606354 -1.403553 2.986123  
H 0.517196 -2.048158 1.783292  
H 0.958252 -0.605687 2.701936  
C 0.444455 2.949313 1.321574  
H 0.374293 3.971575 0.946074  
H -0.395818 2.766877 1.999350  
H 1.368170 2.855971 1.906466  
S -2.938228 -0.050802 0.006418  
O -3.092322 1.006334 1.004793  
O -2.895280 0.317714 -1.409643  
C -4.246874 -1.234141 0.230324  
H -5.169425 -0.722874 -0.047930  
H -4.075467 -2.087973 -0.424692  
H -4.258430 -1.530877 1.277806

TS\_B\_C\_R1Ph\_R2Me\_XNMs\_Meaxec  
SCF Energy: -1295.42047973  
Num. Imaginary Frequencies: 1  
Imaginary Frequency: -549.7020

C -1.053678 -0.651026 1.291758  
N -2.111792 -1.395643 1.731741  
N -2.549615 -2.124671 0.712893  
C -1.640513 0.649680 0.180600  
C -0.842645 1.786124 0.057987  
C -3.007478 0.720908 -0.114816  
C -1.414980 2.993781 -0.355298

H 0.215526 1.758211 0.284137  
C -3.565054 1.925769 -0.511935  
H -3.636176 -0.159702 -0.028534  
C -2.771236 3.072212 -0.639151  
H -0.780587 3.869315 -0.446153  
H -4.627066 1.969294 -0.730298  
H -3.212888 4.010246 -0.958311  
C 0.564882 -0.802315 -0.765598  
H 0.478223 -0.068217 -1.571249  
C -0.779642 -1.006623 -0.096398  
C -1.792854 -1.957065 -0.382741  
C 1.361872 -0.655346 1.649574  
H 2.193669 -0.230846 2.213791  
H 1.427329 -1.749431 1.705583  
C 0.026392 -0.171965 2.226980  
H -0.148483 -0.618741 3.208312  
H 0.036395 0.914205 2.341557  
N 1.474997 -0.221433 0.249184  
C 1.106404 -2.115474 -1.333417  
H 2.063321 -1.929278 -1.826455  
H 1.245489 -2.859900 -0.544021  
H 0.427429 -2.522883 -2.083667  
C -2.152383 -2.616314 -1.676258  
H -1.975416 -1.944106 -2.521002  
H -1.577540 -3.532218 -1.846056  
H -3.210954 -2.883989 -1.661369  
S 2.821892 0.600381 -0.222442  
O 3.078084 1.629490 0.784071  
C 4.195940 -0.534128 -0.158265  
O 2.601635 0.990108 -1.613621  
H 4.034272 -1.325394 -0.888916  
H 5.091028 0.040912 -0.399621  
H 4.263085 -0.937421 0.852893

TS\_B\_D\_R1Ph\_R2Me\_XNMs\_Meaxax  
SCF Energy: -1295.42010689  
Num. Imaginary Frequencies: 1  
Imaginary Frequency: -595.7093

C 0.639584 -0.034547 -0.816602  
N 1.518390 0.625970 -1.720068  
N 1.414440 1.935934 -1.514048  
C 2.381100 -0.225729 -0.405504  
C 2.851215 0.471265 0.708165  
C 3.051467 -1.355314 -0.874190  
C 3.979270 0.006614 1.374543  
H 2.339619 1.363433 1.055711  
C 4.176339 -1.815552 -0.190750  
H 2.724970 -1.848103 -1.783376  
C 4.642765 -1.142650 0.936667  
H 4.336130 0.543766 2.247460  
H 4.697742 -2.692605 -0.560362  
H 5.520386 -1.500813 1.463988  
C -1.085353 0.675552 0.951067  
H -1.871778 1.435775 0.895994  
C -0.054411 0.966470 -0.098812  
C 0.453219 2.162433 -0.580119  
C -0.017739 -1.378126 -1.011656  
H 0.689536 -2.176390 -1.237283  
H -0.717022 -1.301011 -1.852450  
C -0.779638 -1.710143 0.276065  
H -1.342866 -2.635600 0.165996



|   |           |           |           |
|---|-----------|-----------|-----------|
| H | -0.076614 | -1.841173 | 1.105079  |
| N | -1.715214 | -0.645193 | 0.684798  |
| C | -0.499420 | 0.691424  | 2.364881  |
| H | -1.280891 | 0.480479  | 3.099270  |
| H | 0.298093  | -0.049528 | 2.471573  |
| H | -0.072564 | 1.677045  | 2.572774  |
| C | 0.087515  | 3.556256  | -0.186048 |
| H | 0.650071  | 3.867335  | 0.700203  |
| H | 0.320427  | 4.248515  | -0.996961 |
| H | -0.977497 | 3.628281  | 0.048908  |
| S | -3.154423 | -0.575227 | -0.165559 |
| C | -4.331095 | -0.191094 | 1.111461  |
| O | -3.151865 | 0.534236  | -1.122279 |
| O | -3.420924 | -1.924365 | -0.664230 |
| H | -5.299693 | -0.085898 | 0.621126  |
| H | -4.334053 | -1.013353 | 1.825308  |
| H | -4.043124 | 0.746360  | 1.588286  |

TS\_B\_D\_R1Ph\_R2Me\_XNMs\_Meaxec  
 SCF Energy: -1295.41538451  
 Num. Imaginary Frequencies: 1  
 Imaginary Frequency: -592.8032

|   |           |           |           |
|---|-----------|-----------|-----------|
| C | -0.888985 | 0.917537  | -0.954030 |
| N | -2.150033 | 1.558975  | -0.816664 |
| N | -2.040265 | 2.462942  | 0.152335  |
| C | -2.140667 | -0.131172 | -0.221153 |
| C | -2.852091 | -0.982324 | -1.066316 |
| C | -2.017224 | -0.412613 | 1.139529  |
| C | -3.399803 | -2.155495 | -0.548428 |
| H | -3.008919 | -0.718077 | -2.106200 |
| C | -2.579098 | -1.579966 | 1.644157  |
| H | -1.479920 | 0.266726  | 1.794294  |
| C | -3.262196 | -2.463202 | 0.803667  |
| H | -3.953356 | -2.816752 | -1.207112 |
| H | -2.471965 | -1.804292 | 2.700746  |
| H | -3.692609 | -3.374688 | 1.204137  |
| C | 1.461298  | 1.195441  | -0.015458 |
| H | 1.786678  | 1.133974  | 1.029992  |
| C | 0.004993  | 1.536331  | -0.059982 |
| C | -0.749220 | 2.504030  | 0.582449  |
| C | 0.747696  | -0.767306 | -1.597716 |
| H | 0.196649  | -1.583273 | -1.109014 |
| H | 1.327265  | -1.196854 | -2.415398 |
| C | -0.277785 | 0.226812  | -2.140885 |
| H | 0.201802  | 0.979537  | -2.774546 |
| H | -0.999542 | -0.313944 | -2.752518 |
| N | 1.690994  | -0.140242 | -0.636751 |
| C | 2.325521  | 2.253210  | -0.707987 |
| H | 2.054192  | 2.335845  | -1.764184 |
| H | 2.175795  | 3.227337  | -0.232753 |
| H | 3.379038  | 1.975058  | -0.631124 |
| C | -0.316713 | 3.507381  | 1.601449  |
| H | 0.000778  | 4.433601  | 1.112318  |
| H | -1.143297 | 3.745368  | 2.273313  |
| H | 0.525199  | 3.132530  | 2.188868  |
| S | 2.570291  | -1.212165 | 0.257892  |
| O | 3.654418  | -0.467692 | 0.895397  |
| C | 1.492394  | -1.809981 | 1.550492  |
| O | 2.883513  | -2.338392 | -0.618683 |
| H | 2.058699  | -2.542111 | 2.127640  |
| H | 1.203884  | -0.965987 | 2.178506  |

|   |          |           |          |
|---|----------|-----------|----------|
| H | 0.617939 | -2.274484 | 1.091876 |
|---|----------|-----------|----------|

TS\_B\_E\_R1Ph\_R2Me\_XNMs\_Meaxax  
 SCF Energy: -1295.41872194  
 Num. Imaginary Frequencies: 1  
 Imaginary Frequency: -573.7342

|   |           |           |           |
|---|-----------|-----------|-----------|
| C | -1.304620 | 1.009832  | 0.185845  |
| N | -1.454798 | 2.274603  | 0.648170  |
| N | -0.355936 | 2.976846  | 0.351031  |
| C | -2.515705 | 0.145115  | 0.111891  |
| C | -3.028385 | -0.248770 | -1.127921 |
| C | -3.232033 | -0.167799 | 1.272952  |
| C | -4.209963 | -0.983774 | -1.203230 |
| H | -2.515960 | 0.041290  | -2.038158 |
| C | -4.412484 | -0.903656 | 1.198721  |
| H | -2.882424 | 0.183482  | 2.239692  |
| C | -4.898708 | -1.322793 | -0.039431 |
| H | -4.595814 | -1.281689 | -2.172787 |
| H | -4.955300 | -1.141838 | 2.107662  |
| H | -5.817830 | -1.896911 | -0.097774 |
| C | 0.758053  | -0.189659 | -1.191203 |
| H | 1.548237  | 0.301573  | -1.762619 |
| C | 0.016058  | 0.904956  | -0.443358 |
| C | 0.527562  | 2.222672  | -0.299774 |
| C | -0.031157 | 0.139889  | 1.379052  |
| H | -0.860444 | 0.009815  | 2.070235  |
| H | 0.703263  | 0.832948  | 1.781529  |
| C | 0.513652  | -1.207433 | 0.955795  |
| H | 1.020563  | -1.666956 | 1.809676  |
| H | -0.304093 | -1.874375 | 0.663650  |
| N | 1.415742  | -1.071677 | -0.185889 |
| C | -0.045736 | -1.060176 | -2.150382 |
| H | 0.642728  | -1.740341 | -2.656202 |
| H | -0.805386 | -1.651216 | -1.634321 |
| H | -0.535191 | -0.438557 | -2.903800 |
| C | 1.867319  | 2.746876  | -0.710501 |
| H | 2.089076  | 2.523799  | -1.758203 |
| H | 1.877895  | 3.830137  | -0.577016 |
| H | 2.669218  | 2.314882  | -0.102869 |
| S | 3.012413  | -0.714824 | 0.201621  |
| O | 3.085848  | 0.088091  | 1.425799  |
| C | 3.676294  | -2.324712 | 0.553355  |
| O | 3.635739  | -0.196471 | -1.013981 |
| H | 4.720622  | -2.170069 | 0.827975  |
| H | 3.126085  | -2.763191 | 1.385732  |
| H | 3.587520  | -2.930372 | -0.346938 |

TS\_B\_E\_R1Ph\_R2Me\_XNMs\_Meaxec  
 SCF Energy: -1295.41627568  
 Num. Imaginary Frequencies: 1  
 Imaginary Frequency: -555.2604

|   |           |           |           |
|---|-----------|-----------|-----------|
| C | -1.360701 | 0.987181  | -0.271830 |
| N | -1.487957 | 2.213765  | -0.830181 |
| N | -0.358654 | 2.893951  | -0.607571 |
| C | -2.557198 | 0.134540  | -0.063550 |
| C | -2.867580 | -0.360547 | 1.207447  |
| C | -3.426700 | -0.120101 | -1.130370 |
| C | -4.018991 | -1.122154 | 1.402742  |
| H | -2.228565 | -0.126007 | 2.054014  |

|   |           |           |           |   |          |           |           |
|---|-----------|-----------|-----------|---|----------|-----------|-----------|
| C | -4.576874 | -0.879449 | -0.933629 | N | 1.300144 | -1.150374 | 0.203463  |
| H | -3.206808 | 0.292247  | -2.111592 | C | 1.192728 | 0.124536  | 2.444122  |
| C | -4.870956 | -1.388843 | 0.332171  | H | 1.994681 | 0.846589  | 2.315732  |
| H | -4.252577 | -1.498442 | 2.393401  | H | 0.424530 | 0.555197  | 3.092270  |
| H | -5.244945 | -1.071151 | -1.767038 | H | 1.601807 | -0.764351 | 2.928481  |
| H | -5.766485 | -1.982576 | 0.484658  | C | 1.854740 | 2.736572  | 0.462087  |
| C | 0.524467  | -0.271636 | 1.134047  | H | 2.668809 | 2.036864  | 0.259676  |
| H | -0.310328 | -0.929634 | 1.395079  | H | 2.022172 | 3.643395  | -0.122423 |
| C | -0.037542 | 0.885733  | 0.336558  | H | 1.895236 | 3.004161  | 1.522688  |
| C | 0.518257  | 2.169913  | 0.092786  | S | 2.888507 | -0.796486 | -0.225243 |
| C | 0.412302  | -1.333806 | -0.950374 | C | 3.521447 | -2.417577 | -0.590540 |
| H | -0.396761 | -2.000843 | -0.636286 | O | 2.928623 | -0.000842 | -1.455904 |
| H | 0.931608  | -1.811616 | -1.785935 | O | 3.577092 | -0.283136 | 0.954435  |
| C | -0.153630 | -0.010647 | -1.437098 | H | 4.559452 | -2.271072 | -0.892846 |
| H | 0.562108  | 0.654130  | -1.913293 | H | 3.453978 | -3.017800 | 0.315313  |
| H | -1.016063 | -0.188276 | -2.077817 | H | 2.948959 | -2.858885 | -1.405828 |

R1Ph\_R2Ph\_XNMs\_Me:

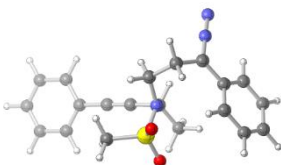

| FILE                        | SCF E       | SCF+ZPVE    | H           | TS         | G           |
|-----------------------------|-------------|-------------|-------------|------------|-------------|
| A_R1Ph_R2Ph_XNMs_Me_conf7   | -933148.109 | -932910.496 | -932894.449 | 52.1366178 | -932946.586 |
| A_R1Ph_R2Ph_XNMs_Me_conf19  | -933146.726 | -932909.266 | -932893.058 | 53.5001957 | -932946.559 |
| A_R1Ph_R2Ph_XNMs_Me_conf3   | -933149.673 | -932912.081 | -932896.645 | 49.2883527 | -932945.933 |
| A_R1Ph_R2Ph_XNMs_Me_conf6   | -933145.25  | -932907.949 | -932891.659 | 53.9413348 | -932945.6   |
| A_R1Ph_R2Ph_XNMs_Me_conf5   | -933145.546 | -932908.167 | -932891.911 | 53.5754968 | -932945.486 |
| A_R1Ph_R2Ph_XNMs_Me_conf9   | -933144.156 | -932906.917 | -932890.564 | 54.6686182 | -932945.232 |
| A_R1Ph_R2Ph_XNMs_Me_conf16  | -933146.195 | -932908.538 | -932892.442 | 52.649293  | -932945.091 |
| A_R1Ph_R2Ph_XNMs_Me_conf11  | -933145.547 | -932908.147 | -932891.914 | 53.1274551 | -932945.042 |
| A_R1Ph_R2Ph_XNMs_Me_conf4   | -933146.89  | -932909.076 | -932893.092 | 51.8724364 | -932944.964 |
| A_R1Ph_R2Ph_XNMs_Me_conf1   | -933148.044 | -932910.344 | -932894.48  | 50.3369209 | -932944.817 |
| A_R1Ph_R2Ph_XNMs_Me         | -933144.574 | -932907.144 | -932890.874 | 53.6733883 | -932944.548 |
| A_R1Ph_R2Ph_XNMs_Me_conf8   | -933145.869 | -932908.107 | -932892.049 | 52.1579531 | -932944.207 |
| A_R1Ph_R2Ph_XNMs_Me_conf10  | -933145.869 | -932908.107 | -932892.049 | 52.1554431 | -932944.204 |
| A_R1Ph_R2Ph_XNMs_Me_conf13  | -933145.906 | -932908.458 | -932892.811 | 51.3070504 | -932944.118 |
| A_R1Ph_R2Ph_XNMs_Me_conf2   | -933144.166 | -932906.806 | -932890.508 | 53.5096084 | -932944.018 |
| A_R1Ph_R2Ph_XNMs_Me_conf12  | -933143.808 | -932906.499 | -932890.207 | 53.7725348 | -932943.979 |
| A_R1Ph_R2Ph_XNMs_Me_conf14  | -933143.991 | -932906.439 | -932890.286 | 52.7816975 | -932943.068 |
| A_R1Ph_R2Ph_XNMs_Me_conf15  | -933146.851 | -932909.209 | -932893.869 | 48.8804716 | -932942.749 |
| A_R1Ph_R2Ph_XNMs_Me_conf18  | -933140.142 | -932902.959 | -932886.596 | 54.1320977 | -932940.729 |
| B_R1Ph_R2Ph_XNMs_Meax_conf1 | -933199     | -932958.507 | -932944.006 | 46.9904133 | -932990.997 |
| B_R1Ph_R2Ph_XNMs_Meax       | -933199     | -932958.507 | -932944.006 | 46.9866482 | -932990.992 |
| B_R1Ph_R2Ph_XNMs_Meax_Ph    | -933199     | -932958.507 | -932944.006 | 46.9866482 | -932990.992 |

|                              |             |             |             |            |             |
|------------------------------|-------------|-------------|-------------|------------|-------------|
| B_R1Ph_R2Ph_XNMs_Meax_conf4  | -933199     | -932958.505 | -932944.005 | 46.9759806 | -932990.981 |
| B_R1Ph_R2Ph_XNMs_Meax_conf8  | -933199     | -932958.504 | -932944.004 | 46.9747256 | -932990.979 |
| B_R1Ph_R2Ph_XNMs_Meax_conf5  | -933197.749 | -932957.327 | -932942.779 | 47.3869992 | -932990.166 |
| B_R1Ph_R2Ph_XNMs_Meax_conf6  | -933197.47  | -932956.994 | -932942.444 | 47.5212862 | -932989.965 |
| B_R1Ph_R2Ph_XNMs_Meax_conf3  | -933196.085 | -932955.584 | -932940.982 | 47.5106186 | -932988.493 |
| B_R1Ph_R2Ph_XNMs_Mee3_conf3  | -933196.121 | -932955.796 | -932941.187 | 47.0588118 | -932988.246 |
| B_R1Ph_R2Ph_XNMs_Mee3_conf1  | -933196.121 | -932955.795 | -932941.187 | 47.0575568 | -932988.245 |
| B_R1Ph_R2Ph_XNMs_Meax_conf7  | -933195.806 | -932955.331 | -932940.771 | 47.1899613 | -932987.961 |
| B_R1Ph_R2Ph_XNMs_Meax_conf2  | -933195.806 | -932955.331 | -932940.772 | 47.1880787 | -932987.96  |
| B_R1Ph_R2Ph_XNMs_Mee3_conf2  | -933194.501 | -932954.216 | -932939.54  | 47.7340119 | -932987.274 |
| B_R1Ph_R2Ph_XNMs_Mee3_conf4  | -933191.513 | -932951.016 | -932936.519 | 47.5099911 | -932984.029 |
| B_R1Ph_R2Ph_XNMs_Meec        | -933191.513 | -932951.01  | -932936.515 | 47.4936758 | -932984.009 |
| B_R1Ph_R2Ph_XNMs_Meax_conf9  | -933190.082 | -932949.734 | -932935.176 | 47.2181992 | -932982.394 |
| C_R1Ph_R2Ph_XNMs_Mee3_conf5  | -933207.749 | -932967.14  | -932952.588 | 46.6804236 | -932999.269 |
| C_R1Ph_R2Ph_XNMs_Mee3_conf3  | -933205.049 | -932964.462 | -932949.946 | 46.6509307 | -932996.597 |
| C_R1Ph_R2Ph_XNMs_Mee3_conf1  | -933202.974 | -932962.778 | -932948.023 | 47.9498751 | -932995.973 |
| C_R1Ph_R2Ph_XNMs_Meec        | -933202.974 | -932962.777 | -932948.022 | 47.9467376 | -932995.969 |
| C_R1Ph_R2Ph_XNMs_Mee3_Ph     | -933202.974 | -932962.777 | -932948.022 | 47.9467376 | -932995.969 |
| C_R1Ph_R2Ph_XNMs_Mee3_conf4  | -933202.974 | -932962.777 | -932948.022 | 47.9467376 | -932995.969 |
| C_R1Ph_R2Ph_XNMs_Mee3_conf2  | -933202.974 | -932962.776 | -932948.022 | 47.9436001 | -932995.965 |
| C_R1Ph_R2Ph_XNMs_Meax_conf5  | -933197.378 | -932956.599 | -932942.142 | 46.7494497 | -932988.891 |
| C_R1Ph_R2Ph_XNMs_Meax        | -933197.378 | -932956.598 | -932942.142 | 46.7450571 | -932988.887 |
| C_R1Ph_R2Ph_XNMs_Meax_Ph     | -933197.378 | -932956.598 | -932942.142 | 46.7450571 | -932988.887 |
| C_R1Ph_R2Ph_XNMs_Meax_conf2  | -933196.867 | -932956.441 | -932941.819 | 46.9113471 | -932988.73  |
| C_R1Ph_R2Ph_XNMs_Meax_conf4  | -933196.866 | -932956.44  | -932941.818 | 46.9113471 | -932988.73  |
| C_R1Ph_R2Ph_XNMs_Meax_conf3  | -933195.525 | -932955.125 | -932940.463 | 47.2382795 | -932987.701 |
| C_R1Ph_R2Ph_XNMs_Meax_conf1  | -933195.151 | -932954.625 | -932940.046 | 47.1083851 | -932987.154 |
| C_R1Ph_R2Ph_XNMs_Meax_conf6  | -933195.151 | -932954.624 | -932940.045 | 47.10211   | -932987.147 |
| D_R1Ph_R2Ph_XNMs_Mee3_conf4  | -933226.037 | -932984.897 | -932970.29  | 47.7616223 | -933018.051 |
| D_R1Ph_R2Ph_XNMs_Mee3_conf2  | -933226.037 | -932984.896 | -932970.289 | 47.7591123 | -933018.048 |
| D_R1Ph_R2Ph_XNMs_Meax_conf2  | -933226.037 | -932984.896 | -932970.289 | 47.7584848 | -933018.048 |
| D_R1Ph_R2Ph_XNMs_Mee3_conf1  | -933225.263 | -932984.285 | -932969.639 | 47.9774856 | -933017.616 |
| D_R1Ph_R2Ph_XNMs_Mee3_conf6  | -933225.263 | -932984.282 | -932969.637 | 47.9724655 | -933017.61  |
| D_R1Ph_R2Ph_XNMs_Meax_conf3  | -933225.008 | -932983.934 | -932969.284 | 47.7421695 | -933017.026 |
| D_R1Ph_R2Ph_XNMs_Mee3_conf8  | -933225.008 | -932983.933 | -932969.284 | 47.739032  | -933017.023 |
| D_R1Ph_R2Ph_XNMs_Meax_conf1  | -933224.791 | -932983.714 | -932969.067 | 47.9109696 | -933016.978 |
| D_R1Ph_R2Ph_XNMs_Meax_Ph     | -933224.81  | -932983.688 | -932969.076 | 47.8287658 | -933016.905 |
| D_R1Ph_R2Ph_XNMs_Mee3_conf7  | -933223.294 | -932982.328 | -932967.618 | 48.6363704 | -933016.255 |
| D_R1Ph_R2Ph_XNMs_Meax_conf4  | -933223.294 | -932982.328 | -932967.618 | 48.6338604 | -933016.252 |
| D_R1Ph_R2Ph_XNMs_Meax_conf6  | -933223.294 | -932982.327 | -932967.618 | 48.6326054 | -933016.251 |
| D_R1Ph_R2Ph_XNMs_Mee3_conf3  | -933223.294 | -932982.327 | -932967.618 | 48.6300953 | -933016.248 |
| D_R1Ph_R2Ph_XNMs_Meax_conf8  | -933223.294 | -932982.326 | -932967.618 | 48.6282128 | -933016.246 |
| D_R1Ph_R2Ph_XNMs_Mee3_conf5  | -933224.237 | -932982.999 | -932968.415 | 47.8250008 | -933016.24  |
| D_R1Ph_R2Ph_XNMs_Meax_conf10 | -933223.568 | -932982.454 | -932967.777 | 47.9172447 | -933015.694 |
| D_R1Ph_R2Ph_XNMs_Meax_conf5  | -933223.568 | -932982.455 | -932967.777 | 47.9166171 | -933015.694 |

|                               |             |             |             |            |             |
|-------------------------------|-------------|-------------|-------------|------------|-------------|
| D_R1Ph_R2Ph_XNMs_Mee3_conf11  | -933222.049 | -932981.136 | -932966.448 | 48.2165666 | -933014.664 |
| D_R1Ph_R2Ph_XNMs_Mee3_conf15  | -933222.049 | -932981.136 | -932966.448 | 48.2102915 | -933014.658 |
| D_R1Ph_R2Ph_XNMs_Meax_conf11  | -933222.46  | -932981.218 | -932966.693 | 47.2683999 | -933013.962 |
| D_R1Ph_R2Ph_XNMs_Mee3_conf13  | -933222.46  | -932981.217 | -932966.692 | 47.2690275 | -933013.961 |
| D_R1Ph_R2Ph_XNMs_Meax_conf9   | -933222.46  | -932981.217 | -932966.692 | 47.2683999 | -933013.96  |
| D_R1Ph_R2Ph_XNMs_Mee3_conf9   | -933222.46  | -932981.217 | -932966.692 | 47.2683999 | -933013.96  |
| D_R1Ph_R2Ph_XNMs_Mee3_conf12  | -933222.46  | -932981.216 | -932966.692 | 47.2677724 | -933013.96  |
| D_R1Ph_R2Ph_XNMs_Mee3_conf10  | -933222.46  | -932981.216 | -932966.692 | 47.2677724 | -933013.96  |
| D_R1Ph_R2Ph_XNMs_Meax_conf12  | -933221.551 | -932980.399 | -932965.855 | 47.5231688 | -933013.378 |
| D_R1Ph_R2Ph_XNMs_Mee3_conf14  | -933221.551 | -932980.398 | -932965.855 | 47.5175212 | -933013.372 |
| D_R1Ph_R2Ph_XNMs_Mee3_Ph      | -933220.988 | -932979.855 | -932965.264 | 47.6078825 | -933012.872 |
| D_R1Ph_R2Ph_XNMs_Meax_conf13  | -933220.988 | -932979.854 | -932965.264 | 47.60851   | -933012.872 |
| D_R1Ph_R2Ph_XNMs_Meax_conf7   | -933220.988 | -932979.854 | -932965.264 | 47.6022349 | -933012.866 |
| E_R1Ph_R2Ph_XNMs_Meax_conf5   | -933204.158 | -932963.587 | -932948.921 | 47.6248253 | -932996.546 |
| E_R1Ph_R2Ph_XNMs_Mee3_Ph      | -933204.158 | -932963.587 | -932948.921 | 47.6229428 | -932996.544 |
| E_R1Ph_R2Ph_XNMs_Mee3_conf4   | -933204.158 | -932963.586 | -932948.921 | 47.6229428 | -932996.544 |
| E_R1Ph_R2Ph_XNMs_Meax_conf8   | -933202.348 | -932961.776 | -932947.043 | 48.7643823 | -932995.808 |
| E_R1Ph_R2Ph_XNMs_Mee3_conf5   | -933200.863 | -932960.562 | -932945.772 | 48.5554217 | -932994.328 |
| E_R1Ph_R2Ph_XNMs_Meax_conf6   | -933200.863 | -932960.562 | -932945.772 | 48.5478916 | -932994.32  |
| E_R1Ph_R2Ph_XNMs_Mee3_conf3   | -933201.728 | -932961.262 | -932946.559 | 47.6649859 | -932994.224 |
| E_R1Ph_R2Ph_XNMs_Meax_conf4   | -933201.728 | -932961.261 | -932946.559 | 47.6643584 | -932994.223 |
| E_R1Ph_R2Ph_XNMs_Mee3_conf6   | -933200.893 | -932960.388 | -932945.665 | 48.2335094 | -932993.899 |
| E_R1Ph_R2Ph_XNMs_Meax_conf7   | -933200.893 | -932960.388 | -932945.665 | 48.2328819 | -932993.898 |
| E_R1Ph_R2Ph_XNMs_Meax_conf3   | -933200.597 | -932960.433 | -932945.671 | 47.5187762 | -932993.19  |
| E_R1Ph_R2Ph_XNMs_Meax_Ph      | -933200.614 | -932960.08  | -932945.454 | 47.3851167 | -932992.84  |
| E_R1Ph_R2Ph_XNMs_Mee3_conf1   | -933199.158 | -932959.224 | -932944.276 | 48.5271838 | -932992.804 |
| E_R1Ph_R2Ph_XNMs_Mee3_conf2   | -933199.157 | -932959.222 | -932944.275 | 48.5265563 | -932992.802 |
| E_R1Ph_R2Ph_XNMs_Meax_conf2   | -933199.157 | -932959.222 | -932944.276 | 48.5215362 | -932992.798 |
| E_R1Ph_R2Ph_XNMs_Meax_conf1   | -933199.229 | -932959.148 | -932944.323 | 47.7465621 | -932992.07  |
| E_R1Ph_R2Ph_XNMs_Mee3_conf7   | -933199.5   | -932958.876 | -932944.856 | 45.3657915 | -932990.222 |
| TS_A_B_R1Ph_R2Ph_XNMs_Meax_Ph | -933127.117 | -932889.672 | -932874.434 | 49.0787645 | -932923.512 |
| TS_A_B_R1Ph_R2Ph_XNMs_Mee3_Ph | -933126.866 | -932889.212 | -932874.134 | 48.4010544 | -932922.535 |
| TS_B_C_R1Ph_R2Ph_XNMs_Meax_Ph | -933162.418 | -932922.956 | -932908.722 | 45.9569053 | -932954.679 |
| TS_B_C_R1Ph_R2Ph_XNMs_Mee3_Ph | -933168.111 | -932928.959 | -932914.586 | 46.3905143 | -932960.977 |
| TS_B_D_R1Ph_R2Ph_XNMs_Meax_Ph | -933164.344 | -932925.332 | -932910.927 | 46.9891583 | -932957.916 |
| TS_B_D_R1Ph_R2Ph_XNMs_Mee3_Ph | -933166.198 | -932927.029 | -932912.758 | 45.9525128 | -932958.711 |
| TS_B_E_R1Ph_R2Ph_XNMs_Mee3_Ph | -933160.455 | -932921.233 | -932906.856 | 46.5988474 | -932953.455 |

## A\_R1Ph\_R2Ph\_XNMs\_Me\_conf7

SCF Energy: -1487.06636366

Num. Imaginary Frequencies: 0

|   |           |           |           |
|---|-----------|-----------|-----------|
| C | -2.722164 | -1.399449 | 1.124728  |
| N | -2.665391 | -2.697886 | 1.160581  |
| N | -2.627834 | -3.836953 | 1.188627  |
| C | -3.397346 | -0.782196 | -0.024942 |
| C | -3.629462 | 0.603624  | -0.047302 |
| C | -3.809610 | -1.545906 | -1.130891 |
| C | -4.246251 | 1.200388  | -1.142789 |
| H | -3.302020 | 1.226681  | 0.778290  |
| C | -4.424758 | -0.941207 | -2.223689 |
| H | -3.638450 | -2.618973 | -1.148319 |
| C | -4.646066 | 0.436028  | -2.239646 |
| H | -4.404654 | 2.274469  | -1.140042 |
| H | -4.726679 | -1.552061 | -3.068893 |
| H | -5.119822 | 0.906706  | -3.094754 |
| C | 0.006391  | -0.289930 | -0.587408 |
| H | -0.418295 | -1.290035 | -0.442615 |
| C | 1.477350  | -0.415888 | -0.555377 |
| C | 2.685683  | -0.497499 | -0.520651 |
| C | -2.001347 | -0.659820 | 2.226806  |
| H | -1.984454 | -1.272561 | 3.133610  |
| H | -2.548815 | 0.254502  | 2.469496  |
| C | -0.561050 | -0.294938 | 1.853082  |
| H | -0.113330 | 0.283482  | 2.666565  |
| H | 0.047378  | -1.196537 | 1.728574  |
| N | -0.506364 | 0.459567  | 0.584401  |
| C | -0.494214 | 0.203787  | -1.948689 |
| H | -0.011204 | 1.132866  | -2.246173 |
| H | -0.268283 | -0.569905 | -2.686576 |
| H | -1.575377 | 0.358065  | -1.907283 |
| C | 4.120363  | -0.570710 | -0.477913 |
| S | -0.318643 | 2.096247  | 0.741198  |
| O | -0.556043 | 2.717860  | -0.557016 |
| O | -1.161143 | 2.473998  | 1.877153  |
| C | 1.375990  | 2.422948  | 1.197708  |
| H | 1.437999  | 3.490957  | 1.411515  |
| H | 1.621944  | 1.838533  | 2.085165  |
| H | 2.016213  | 2.150439  | 0.358886  |
| C | 4.757409  | -1.663746 | 0.129166  |
| C | 6.147235  | -1.725339 | 0.169781  |
| C | 6.912144  | -0.701457 | -0.390797 |
| C | 6.282973  | 0.387628  | -0.995310 |
| C | 4.893538  | 0.456137  | -1.041374 |
| H | 4.157203  | -2.456768 | 0.563358  |
| H | 6.633921  | -2.573786 | 0.639805  |
| H | 7.995663  | -0.752436 | -0.357244 |
| H | 6.875134  | 1.184782  | -1.432909 |
| H | 4.397991  | 1.298931  | -1.512940 |

## B\_R1Ph\_R2Ph\_XNMs\_Meox\_conf1

SCF Energy: -1487.14746380

Num. Imaginary Frequencies: 0

|   |           |          |           |
|---|-----------|----------|-----------|
| C | -1.352309 | 0.224156 | 0.977090  |
| N | -1.032979 | 1.189187 | 2.059584  |
| N | 0.059737  | 1.746898 | 1.834132  |
| C | -2.678665 | 0.650555 | 0.343829  |
| C | -2.714410 | 1.862394 | -0.357390 |

|   |           |           |           |
|---|-----------|-----------|-----------|
| C | -3.849046 | -0.100545 | 0.453354  |
| C | -3.892117 | 2.308440  | -0.946872 |
| H | -1.809026 | 2.458565  | -0.445879 |
| C | -5.031126 | 0.342742  | -0.144853 |
| H | -3.862799 | -1.038846 | 0.996968  |
| C | -5.056593 | 1.544079  | -0.846861 |
| H | -3.901415 | 3.250133  | -1.486286 |
| H | -5.931168 | -0.257139 | -0.056204 |
| H | -5.975843 | 1.886049  | -1.311314 |
| C | 0.048717  | -0.639955 | -1.052458 |
| H | 1.072404  | -0.544988 | -1.425447 |
| C | -0.172463 | 0.346933  | 0.058184  |
| C | 0.642579  | 1.268714  | 0.601794  |
| C | -1.323668 | -1.202158 | 1.558613  |
| H | -2.201036 | -1.393805 | 2.180492  |
| H | -0.448494 | -1.283905 | 2.211357  |
| C | -1.225758 | -2.228781 | 0.422073  |
| H | -1.146295 | -3.239899 | 0.821440  |
| H | -2.122906 | -2.195350 | -0.204313 |
| N | -0.076730 | -2.000020 | -0.465586 |
| C | -0.906674 | -0.487171 | -2.237212 |
| H | -0.632938 | -1.208250 | -3.010191 |
| H | -1.945691 | -0.655744 | -1.943468 |
| H | -0.834543 | 0.524815  | -2.646063 |
| C | 1.961230  | 1.764109  | 0.190204  |
| S | 1.339811  | -2.824839 | -0.200669 |
| C | 2.293502  | -1.948065 | 1.028481  |
| O | 0.969258  | -4.125528 | 0.351653  |
| O | 2.097271  | -2.756361 | -1.448358 |
| H | 3.232103  | -2.493679 | 1.138508  |
| H | 2.483694  | -0.934719 | 0.668623  |
| H | 1.740911  | -1.941421 | 1.967914  |
| C | 2.291460  | 1.882164  | -1.166828 |
| C | 3.562245  | 2.307381  | -1.546434 |
| C | 4.511225  | 2.628512  | -0.575803 |
| C | 4.183197  | 2.529980  | 0.777146  |
| C | 2.915070  | 2.102019  | 1.160926  |
| H | 1.543543  | 1.668742  | -1.925589 |
| H | 3.806994  | 2.397825  | -2.599709 |
| H | 5.500278  | 2.962282  | -0.872640 |
| H | 4.916870  | 2.785508  | 1.534891  |
| H | 2.657584  | 2.020887  | 2.212444  |

## B\_R1Ph\_R2Ph\_XNMs\_Mee3\_conf3

SCF Energy: -1487.14287560

Num. Imaginary Frequencies: 0

|   |           |          |           |
|---|-----------|----------|-----------|
| C | 0.239294  | 1.177482 | 1.015977  |
| N | -0.640305 | 2.312601 | 1.372762  |
| N | -1.809649 | 2.075962 | 1.006642  |
| C | 1.338285  | 1.696217 | 0.090423  |
| C | 2.570008  | 2.122923 | 0.591802  |
| C | 1.091809  | 1.801249 | -1.283561 |
| C | 3.549125  | 2.621075 | -0.268996 |
| H | 2.780697  | 2.073009 | 1.655352  |
| C | 2.066370  | 2.304509 | -2.142165 |
| H | 0.133550  | 1.483333 | -1.686060 |
| C | 3.302980  | 2.708869 | -1.637772 |
| H | 4.504189  | 2.941362 | 0.135214  |
| H | 1.860840  | 2.375212 | -3.205570 |
| H | 4.066194  | 3.093886 | -2.306285 |

|   |           |           |           |   |           |           |           |
|---|-----------|-----------|-----------|---|-----------|-----------|-----------|
| C | -0.214365 | -1.201864 | 0.123049  | N | 2.146027  | -0.447010 | -0.631985 |
| H | -0.208156 | -1.410661 | -0.951392 | C | 0.377045  | -0.756840 | -2.294204 |
| C | -0.698119 | 0.198604  | 0.382834  | H | 0.903810  | -0.182600 | -3.059297 |
| C | -1.914245 | 0.775416  | 0.385730  | H | 0.691494  | -1.798239 | -2.377788 |
| C | 1.572024  | -0.767409 | 1.901906  | H | -0.695140 | -0.716693 | -2.496261 |
| H | 2.635183  | -0.513504 | 1.865687  | C | -1.655645 | 1.696071  | 0.354812  |
| H | 1.449401  | -1.550514 | 2.657210  | S | 3.211115  | 0.809080  | -0.462332 |
| C | 0.754223  | 0.481151  | 2.288127  | O | 4.550018  | 0.224632  | -0.477393 |
| H | -0.118318 | 0.201131  | 2.886146  | O | 2.839700  | 1.803925  | -1.466202 |
| H | 1.358025  | 1.154689  | 2.899380  | C | 2.959440  | 1.549497  | 1.139913  |
| N | 1.190242  | -1.254984 | 0.565864  | H | 3.678375  | 2.366220  | 1.222440  |
| C | -1.062521 | -2.257218 | 0.842494  | H | 1.937590  | 1.929918  | 1.193711  |
| H | -0.672493 | -3.251383 | 0.611921  | H | 3.135814  | 0.793253  | 1.905606  |
| H | -1.021249 | -2.100419 | 1.924646  | C | -2.158150 | 1.522348  | -0.940402 |
| H | -2.107233 | -2.202608 | 0.528655  | C | -2.972941 | 2.493324  | -1.518885 |
| C | -3.229884 | 0.328747  | -0.089305 | C | -3.293669 | 3.647656  | -0.807592 |
| S | 2.288051  | -2.167794 | -0.253236 | C | -2.796788 | 3.828479  | 0.485874  |
| O | 3.060968  | -2.945439 | 0.715474  | C | -1.981820 | 2.862782  | 1.064014  |
| O | 1.564001  | -2.862567 | -1.317899 | H | -1.930232 | 0.619483  | -1.496838 |
| C | 3.400421  | -0.999333 | -1.006319 | H | -3.356238 | 2.344725  | -2.522913 |
| H | 4.166596  | -1.577538 | -1.524732 | H | -3.927543 | 4.405075  | -1.257392 |
| H | 2.826387  | -0.383255 | -1.699391 | H | -3.043445 | 4.726998  | 1.042130  |
| H | 3.845256  | -0.384587 | -0.222501 | H | -1.586683 | 2.999387  | 2.064834  |
| C | -3.334570 | -0.546682 | -1.178608 |   |           |           |           |
| C | -4.582713 | -0.976033 | -1.620760 |   |           |           |           |
| C | -5.741613 | -0.528435 | -0.984869 |   |           |           |           |
| C | -5.645660 | 0.355009  | 0.090568  |   |           |           |           |
| C | -4.397856 | 0.785277  | 0.535741  |   |           |           |           |
| H | -2.436213 | -0.879502 | -1.691702 |   |           |           |           |
| H | -4.650920 | -1.652940 | -2.466250 |   |           |           |           |
| H | -6.714864 | -0.861983 | -1.330457 |   |           |           |           |
| H | -6.544361 | 0.709571  | 0.585079  |   |           |           |           |
| H | -4.321043 | 1.473092  | 1.371585  |   |           |           |           |

C\_R1Ph\_R2Ph\_XNMs\_Meax\_conf5  
 SCF Energy: -1487.14487774  
 Num. Imaginary Frequencies: 0

|   |           |           |           |
|---|-----------|-----------|-----------|
| C | 0.688312  | -0.979786 | 1.450331  |
| N | 0.562977  | -0.227531 | 2.482323  |
| N | -0.365006 | 0.807150  | 2.189502  |
| C | -1.247671 | -1.640324 | 0.062891  |
| C | -2.587394 | -1.454439 | 0.424865  |
| C | -0.871060 | -2.892247 | -0.443000 |
| C | -3.523487 | -2.475299 | 0.257401  |
| H | -2.920768 | -0.510855 | 0.842111  |
| C | -1.803961 | -3.911043 | -0.612977 |
| H | 0.159884  | -3.090885 | -0.711112 |
| C | -3.139030 | -3.705562 | -0.267170 |
| H | -4.555812 | -2.300360 | 0.542726  |
| H | -1.482086 | -4.867213 | -1.012690 |
| H | -3.867831 | -4.498478 | -0.399565 |
| C | 0.732366  | -0.152087 | -0.934037 |
| H | 0.658549  | 0.933168  | -1.042265 |
| C | -0.193593 | -0.545918 | 0.298528  |
| C | -0.777538 | 0.687896  | 0.973161  |
| C | 1.754525  | -2.008070 | 1.297260  |
| H | 1.341515  | -3.020997 | 1.331443  |
| H | 2.451889  | -1.905391 | 2.131758  |
| C | 2.459131  | -1.762528 | -0.066944 |
| H | 3.541196  | -1.842980 | 0.028679  |
| H | 2.153652  | -2.508984 | -0.805159 |

C\_R1Ph\_R2Ph\_XNMs\_Mee3\_conf5  
 SCF Energy: -1487.16140591  
 Num. Imaginary Frequencies: 0

|   |           |           |           |
|---|-----------|-----------|-----------|
| C | 0.244097  | 0.141745  | 2.168732  |
| N | -0.628252 | -0.266156 | 3.016869  |
| N | -1.816012 | -0.618435 | 2.313830  |
| C | -0.322887 | 1.505399  | 0.151454  |
| C | 0.338342  | 1.876871  | -1.020582 |
| C | -1.093333 | 2.459014  | 0.828369  |
| C | 0.220547  | 3.180061  | -1.508874 |
| H | 0.950136  | 1.168051  | -1.567963 |
| C | -1.208354 | 3.757562  | 0.341567  |
| H | -1.612633 | 2.180426  | 1.743362  |
| C | -0.549921 | 4.122912  | -0.833471 |
| H | 0.739527  | 3.452853  | -2.422346 |
| H | -1.812585 | 4.481609  | 0.878686  |
| H | -0.637301 | 5.134329  | -1.217058 |
| C | 0.664513  | -0.915809 | -0.010799 |
| H | 0.483512  | -0.830821 | -1.084092 |
| C | -0.254762 | 0.094689  | 0.745629  |
| C | -1.637352 | -0.452872 | 1.046262  |
| C | 2.536735  | -0.477562 | 1.614236  |
| H | 3.571908  | -0.135656 | 1.619565  |
| H | 2.496599  | -1.489704 | 2.036858  |
| C | 1.664532  | 0.474982  | 2.451402  |
| H | 1.884454  | 0.363218  | 3.514655  |
| H | 1.870149  | 1.505842  | 2.142602  |
| N | 2.054371  | -0.472636 | 0.225235  |
| C | 0.407222  | -2.360467 | 0.425168  |
| H | 0.411802  | -2.471882 | 1.513907  |
| H | -0.564753 | -2.694595 | 0.053808  |
| H | 1.168947  | -3.023294 | 0.009223  |
| C | -2.678769 | -0.767730 | 0.056185  |
| S | 3.185494  | -0.631356 | -0.975371 |
| O | 4.272937  | 0.289036  | -0.655972 |
| C | 3.858276  | -2.281118 | -0.891028 |
| O | 2.470499  | -0.493172 | -2.243057 |

|   |           |           |           |
|---|-----------|-----------|-----------|
| H | 4.691146  | -2.315108 | -1.594798 |
| H | 4.211051  | -2.459902 | 0.125884  |
| H | 3.084807  | -2.992531 | -1.177943 |
| C | -2.493096 | -0.481125 | -1.302200 |
| C | -3.481380 | -0.804547 | -2.230808 |
| C | -4.660904 | -1.415987 | -1.811760 |
| C | -4.851897 | -1.705333 | -0.457804 |
| C | -3.868866 | -1.385775 | 0.470676  |
| H | -1.587345 | 0.011733  | -1.640821 |
| H | -3.327619 | -0.574807 | -3.280032 |
| H | -5.429901 | -1.667497 | -2.535177 |
| H | -5.768592 | -2.183768 | -0.128409 |
| H | -4.005888 | -1.612587 | 1.522593  |

D\_R1Ph\_R2Ph\_XNMs\_Meax\_conf3  
 SCF Energy: -1487.18890977  
 Num. Imaginary Frequencies: 0

|   |           |           |           |
|---|-----------|-----------|-----------|
| C | 0.671852  | -0.797912 | -0.047790 |
| N | 1.924478  | -0.266375 | -0.111466 |
| N | 1.896679  | 1.079420  | -0.154331 |
| C | 3.171246  | -0.948048 | -0.097945 |
| C | 4.231253  | -0.409236 | 0.632842  |
| C | 3.327777  | -2.133691 | -0.815641 |
| C | 5.454746  | -1.072692 | 0.648080  |
| H | 4.085396  | 0.517485  | 1.176322  |
| C | 4.552963  | -2.797288 | -0.778972 |
| H | 2.511324  | -2.521448 | -1.415129 |
| C | 5.617862  | -2.270503 | -0.049863 |
| H | 6.280877  | -0.655801 | 1.214836  |
| H | 4.675946  | -3.719661 | -1.336980 |
| H | 6.571907  | -2.786731 | -0.029759 |
| C | -1.703409 | 0.102159  | 0.077443  |
| H | -2.208320 | 0.534444  | -0.789064 |
| C | -0.211644 | 0.259411  | -0.062839 |
| C | 0.610417  | 1.419289  | -0.127217 |
| C | 0.295147  | -2.232857 | 0.127583  |
| H | 1.009735  | -2.755786 | 0.770961  |
| H | 0.257725  | -2.754781 | -0.834430 |
| C | -1.096500 | -2.252157 | 0.762193  |
| H | -1.509941 | -3.260965 | 0.722435  |
| H | -1.036585 | -1.936639 | 1.812305  |
| N | -1.981786 | -1.353778 | 0.006903  |
| C | -2.234482 | 0.765405  | 1.352783  |
| H | -1.864449 | 1.791647  | 1.421590  |
| H | -3.326846 | 0.806840  | 1.343279  |
| H | -1.897574 | 0.222743  | 2.241623  |
| C | 0.229834  | 2.845301  | -0.159917 |
| S | -3.526741 | -1.864052 | -0.267575 |
| C | -4.341188 | -2.042930 | 1.311442  |
| O | -4.192357 | -0.799766 | -1.016028 |
| O | -3.444075 | -3.207143 | -0.839452 |
| H | -5.328348 | -2.460656 | 1.108897  |
| H | -3.756828 | -2.730993 | 1.923978  |
| H | -4.423482 | -1.065777 | 1.784394  |
| C | -0.937893 | 3.267518  | -0.806853 |
| C | -1.285478 | 4.616893  | -0.830758 |
| C | -0.467685 | 5.562370  | -0.212684 |
| C | 0.702108  | 5.150320  | 0.427574  |
| C | 1.047723  | 3.801721  | 0.456275  |
| H | -1.569689 | 2.544289  | -1.313280 |
| H | -2.192065 | 4.928960  | -1.339539 |

|   |           |          |           |
|---|-----------|----------|-----------|
| H | -0.738808 | 6.613166 | -0.231010 |
| H | 1.343651  | 5.880463 | 0.911060  |
| H | 1.952191  | 3.476005 | 0.960403  |

D\_R1Ph\_R2Ph\_XNMs\_Meax\_conf5  
 SCF Energy: -1487.18661435  
 Num. Imaginary Frequencies: 0

|   |           |           |           |
|---|-----------|-----------|-----------|
| C | 0.692114  | -0.784837 | 0.062273  |
| N | 1.931825  | -0.228702 | 0.008596  |
| N | 1.878755  | 1.115118  | -0.054664 |
| C | 3.193246  | -0.890900 | -0.042959 |
| C | 3.548943  | -1.790463 | 0.960622  |
| C | 4.062494  | -0.608021 | -1.095548 |
| C | 4.783337  | -2.434353 | 0.892251  |
| H | 2.877390  | -1.964961 | 1.795184  |
| C | 5.300486  | -1.243830 | -1.145654 |
| H | 3.761301  | 0.103360  | -1.857167 |
| C | 5.659276  | -2.162537 | -0.158254 |
| H | 5.065024  | -3.135962 | 1.670484  |
| H | 5.982027  | -1.026607 | -1.961510 |
| H | 6.622214  | -2.660491 | -0.204178 |
| C | -1.704256 | 0.062560  | 0.120154  |
| H | -2.191312 | 0.549952  | -0.726246 |
| C | -0.212893 | 0.254446  | 0.036041  |
| C | 0.584989  | 1.430184  | -0.029372 |
| C | 0.336514  | -2.235143 | 0.094676  |
| H | 1.012090  | -2.816201 | 0.726072  |
| H | 0.374962  | -2.657529 | -0.915574 |
| C | -1.087844 | -2.334489 | 0.643788  |
| H | -1.475585 | -3.342628 | 0.490005  |
| H | -1.089110 | -2.117619 | 1.720556  |
| N | -1.956795 | -1.387741 | -0.070088 |
| C | -2.281157 | 0.625518  | 1.423179  |
| H | -1.934148 | 1.652617  | 1.566197  |
| H | -3.373760 | 0.645324  | 1.390383  |
| H | -1.951161 | 0.033352  | 2.282615  |
| C | 0.179726  | 2.850458  | -0.041488 |
| S | -3.487133 | -1.891522 | -0.429027 |
| C | -4.340841 | -2.211597 | 1.106336  |
| O | -4.147746 | -0.775594 | -1.103000 |
| O | -3.371566 | -3.180261 | -1.109716 |
| H | -5.320871 | -2.610981 | 0.841535  |
| H | -3.770883 | -2.950791 | 1.670824  |
| H | -4.439214 | -1.280253 | 1.661596  |
| C | -1.000812 | 3.264882  | -0.670090 |
| C | -1.367742 | 4.609517  | -0.672527 |
| C | -0.557394 | 5.558791  | -0.050853 |
| C | 0.624620  | 5.154965  | 0.571868  |
| C | 0.989572  | 3.811235  | 0.579224  |
| H | -1.627811 | 2.541529  | -1.181433 |
| H | -2.283962 | 4.914753  | -1.168077 |
| H | -0.843691 | 6.605717  | -0.052626 |
| H | 1.260896  | 5.887616  | 1.058554  |
| H | 1.903461  | 3.491942  | 1.070048  |

D\_R1Ph\_R2Ph\_XNMs\_Mee3\_conf4  
 SCF Energy: -1487.19054926  
 Num. Imaginary Frequencies: 0

|   |          |           |          |
|---|----------|-----------|----------|
| C | 0.741130 | -0.542344 | 0.293113 |
|---|----------|-----------|----------|

|   |           |           |           |   |           |           |           |
|---|-----------|-----------|-----------|---|-----------|-----------|-----------|
| N | 1.697262  | 0.374057  | -0.027260 | H | -4.900403 | 1.234148  | 1.357780  |
| N | 1.173967  | 1.598888  | -0.226450 | H | -5.935630 | -2.237952 | -0.954887 |
| C | 3.103558  | 0.183367  | -0.110701 | H | -6.625541 | -0.192144 | 0.278313  |
| C | 3.618486  | -0.957691 | -0.724806 | C | -0.205640 | 0.555513  | -0.606020 |
| C | 3.952031  | 1.154861  | 0.421792  | H | -1.245880 | 0.879790  | -0.740407 |
| C | 4.999457  | -1.137244 | -0.783196 | C | -0.222604 | -0.735772 | 0.274504  |
| H | 2.949968  | -1.684669 | -1.173248 | C | 0.825762  | -1.778463 | -0.084356 |
| C | 5.329712  | 0.972413  | 0.342494  | C | 0.032044  | 1.300740  | 1.660094  |
| H | 3.525011  | 2.035458  | 0.888553  | H | -0.927329 | 1.795972  | 1.851204  |
| C | 5.857062  | -0.175143 | -0.252020 | H | 0.765262  | 1.701889  | 2.359867  |
| H | 5.402283  | -2.024561 | -1.260290 | C | -0.089755 | -0.228581 | 1.743316  |
| H | 5.992725  | 1.725800  | 0.755059  | H | 0.805750  | -0.657203 | 2.196782  |
| H | 6.931546  | -0.315598 | -0.305366 | H | -0.941580 | -0.530376 | 2.354968  |
| C | -1.764007 | -0.521849 | 0.701000  | N | 0.487510  | 1.526822  | 0.270935  |
| H | -2.531157 | -0.389890 | -0.067541 | C | 0.423409  | 0.375466  | -1.978384 |
| C | -0.466770 | 0.124730  | 0.284681  | H | 1.497619  | 0.183205  | -1.905653 |
| C | -0.137283 | 1.469340  | -0.041598 | H | -0.047489 | -0.478344 | -2.475852 |
| C | -0.301871 | -2.405591 | 1.478782  | H | 0.248025  | 1.255635  | -2.601165 |
| H | -0.330103 | -3.486893 | 1.605073  | C | 2.292593  | -1.701574 | 0.069766  |
| H | -0.303474 | -1.951250 | 2.473541  | S | 0.522032  | 3.125419  | -0.228929 |
| C | 0.949858  | -1.963718 | 0.708677  | O | -0.565686 | 3.377025  | -1.175535 |
| H | 1.832726  | -2.057628 | 1.349749  | O | 0.609935  | 3.938825  | 0.982543  |
| H | 1.115111  | -2.621042 | -0.152579 | C | 2.067736  | 3.255341  | -1.096473 |
| N | -1.554184 | -1.983766 | 0.833052  | H | 2.144557  | 4.290603  | -1.432605 |
| C | -2.316208 | 0.053892  | 2.005899  | H | 2.866651  | 3.008995  | -0.397568 |
| H | -2.473021 | 1.130637  | 1.895293  | H | 2.058949  | 2.574559  | -1.946562 |
| H | -3.268189 | -0.423020 | 2.249276  | C | 2.950969  | -0.514561 | 0.417741  |
| H | -1.613334 | -0.103558 | 2.828514  | C | 4.339091  | -0.489484 | 0.551211  |
| C | -1.021421 | 2.643539  | -0.174753 | C | 5.086514  | -1.645674 | 0.341950  |
| S | -2.182632 | -2.926209 | -0.376343 | C | 4.437860  | -2.834268 | -0.003092 |
| C | -1.388739 | -2.476482 | -1.912623 | C | 3.055376  | -2.864085 | -0.136396 |
| O | -1.824499 | -4.308035 | -0.062319 | H | 2.384630  | 0.397651  | 0.569921  |
| O | -3.591139 | -2.558446 | -0.510310 | H | 4.833528  | 0.438780  | 0.819623  |
| H | -1.893251 | -3.037845 | -2.700448 | H | 6.166461  | -1.624588 | 0.448129  |
| H | -1.510641 | -1.403568 | -2.069498 | H | 5.012671  | -3.740376 | -0.165522 |
| H | -0.335437 | -2.749465 | -1.859629 | H | 2.548404  | -3.785628 | -0.399774 |
| C | -2.314919 | 2.517160  | -0.695391 |   |           |           |           |
| C | -3.143041 | 3.632015  | -0.811319 |   |           |           |           |
| C | -2.686240 | 4.888150  | -0.413452 |   |           |           |           |
| C | -1.394886 | 5.023535  | 0.098475  |   |           |           |           |
| C | -0.568742 | 3.909230  | 0.220075  |   |           |           |           |
| H | -2.671604 | 1.549390  | -1.035443 |   |           |           |           |
| H | -4.142291 | 3.519100  | -1.219732 |   |           |           |           |
| H | -3.331394 | 5.756293  | -0.503095 |   |           |           |           |
| H | -1.033070 | 5.998262  | 0.410545  |   |           |           |           |
| H | 0.432496  | 4.007966  | 0.627635  |   |           |           |           |

TS\_A\_B\_R1Ph\_R2Ph\_XNMs\_Meax\_Ph

SCF Energy: -1487.03290964

Num. Imaginary Frequencies: 1

Imaginary Frequency: -444.3280

|   |           |           |           |
|---|-----------|-----------|-----------|
| C | 1.291604  | -0.586589 | 1.092455  |
| N | 0.392027  | -1.243893 | 1.841779  |
| N | -0.683703 | -1.644824 | 1.902391  |
| C | 2.296128  | -1.488022 | 0.455192  |
| C | 1.868439  | -2.670288 | -0.167576 |
| C | 3.655928  | -1.158955 | 0.424347  |
| C | 2.779139  | -3.495619 | -0.816647 |
| H | 0.812239  | -2.927812 | -0.157572 |
| C | 4.566715  | -1.984272 | -0.235787 |
| H | 4.017191  | -0.260718 | 0.914773  |
| C | 4.132821  | -3.151878 | -0.859397 |
| H | 2.432878  | -4.404555 | -1.298216 |
| H | 5.617643  | -1.713790 | -0.254903 |
| H | 4.842374  | -3.792898 | -1.372438 |
| C | 0.317106  | 0.915581  | -1.271168 |
| H | -0.471900 | 1.359581  | -1.882150 |
| C | -0.334843 | -0.107137 | -0.405497 |
| C | -1.350018 | -0.736230 | -0.063856 |
| C | 1.674213  | 0.790229  | 1.589303  |
| H | 2.551740  | 0.746917  | 2.247348  |

E\_R1Ph\_R2Ph\_XNMs\_Mee3\_Ph

SCF Energy: -1487.15568235

Num. Imaginary Frequencies: 0

|   |           |           |           |
|---|-----------|-----------|-----------|
| C | -1.448628 | -1.564989 | -0.056244 |
| N | -1.124549 | -2.727367 | -0.514310 |
| N | 0.274859  | -2.862450 | -0.520038 |
| C | -2.862905 | -1.159417 | 0.045100  |
| C | -3.262571 | -0.007173 | 0.734329  |
| C | -3.845642 | -1.958441 | -0.562840 |
| C | -4.610325 | 0.338224  | 0.818945  |
| H | -2.531639 | 0.631943  | 1.215110  |
| C | -5.188369 | -1.612401 | -0.477431 |
| H | -3.539445 | -2.847563 | -1.102882 |
| C | -5.576384 | -0.462323 | 0.214596  |



|   |           |           |           |
|---|-----------|-----------|-----------|
| H | 0.845747  | 1.202173  | 2.170007  |
| C | 1.990389  | 1.752736  | 0.433597  |
| H | 2.332789  | 2.697881  | 0.862306  |
| H | 2.810922  | 1.377025  | -0.183420 |
| N | 0.874248  | 2.036163  | -0.475690 |
| C | 1.376219  | 0.357829  | -2.221367 |
| H | 1.759962  | 1.165788  | -2.849653 |
| H | 2.208597  | -0.115961 | -1.699234 |
| H | 0.910951  | -0.397757 | -2.858993 |
| C | -2.728831 | -1.167394 | -0.094866 |
| S | -0.191858 | 3.213864  | 0.036873  |
| C | 0.599878  | 4.722850  | -0.477651 |
| O | -1.427753 | 3.059778  | -0.728714 |
| O | -0.265641 | 3.235412  | 1.499794  |
| H | -0.036359 | 5.540690  | -0.136921 |
| H | 1.582447  | 4.785448  | -0.009846 |
| H | 0.678867  | 4.708224  | -1.563745 |
| C | -3.086562 | -2.508738 | 0.106589  |
| C | -4.420937 | -2.899967 | 0.034767  |
| C | -5.418245 | -1.956657 | -0.217619 |
| C | -5.071916 | -0.617629 | -0.404882 |
| C | -3.737461 | -0.223379 | -0.350935 |
| H | -2.310510 | -3.237328 | 0.321194  |
| H | -4.683965 | -3.942505 | 0.184806  |
| H | -6.458632 | -2.262434 | -0.264279 |
| H | -5.842749 | 0.122089  | -0.598038 |
| H | -3.459974 | 0.815644  | -0.503019 |

TS\_A\_B\_R1Ph\_R2Ph\_XNMs\_Mee3\_Ph  
 SCF Energy: -1487.03251084  
 Num. Imaginary Frequencies: 1  
 Imaginary Frequency: -441.7213

|   |           |           |           |
|---|-----------|-----------|-----------|
| C | 1.427410  | -0.582114 | -1.090073 |
| N | 0.552927  | -1.176589 | -1.920169 |
| N | -0.536050 | -1.523813 | -2.049462 |
| C | 2.293599  | -1.541300 | -0.342230 |
| C | 1.728095  | -2.699107 | 0.214813  |
| C | 3.659230  | -1.298122 | -0.153885 |
| C | 2.510479  | -3.587830 | 0.942870  |
| H | 0.667683  | -2.895834 | 0.081021  |
| C | 4.440144  | -2.187116 | 0.585148  |
| H | 4.130502  | -0.424648 | -0.592156 |
| C | 3.870342  | -3.332445 | 1.135427  |
| H | 2.058074  | -4.478753 | 1.366421  |
| H | 5.497371  | -1.983591 | 0.721378  |
| H | 4.479578  | -4.024275 | 1.707914  |
| C | 0.526649  | 0.857449  | 1.210062  |
| H | 1.425428  | 0.341559  | 1.571697  |
| C | -0.219550 | -0.067990 | 0.312464  |
| C | -1.245268 | -0.669555 | -0.049496 |
| C | 2.243711  | 1.705364  | -0.376123 |
| H | 2.989679  | 1.279193  | 0.300550  |
| H | 2.649183  | 2.638663  | -0.762902 |
| C | 1.965778  | 0.755534  | -1.550100 |
| H | 1.242367  | 1.215831  | -2.230153 |
| H | 2.896435  | 0.635390  | -2.119068 |
| N | 1.082795  | 2.019863  | 0.465758  |
| C | -0.305327 | 1.238374  | 2.434141  |
| H | -1.261382 | 1.684929  | 2.156562  |
| H | -0.501281 | 0.325742  | 3.001630  |
| H | 0.240813  | 1.948303  | 3.058521  |

|   |           |           |           |
|---|-----------|-----------|-----------|
| C | -2.622915 | -1.111552 | -0.003130 |
| S | 0.108855  | 3.287649  | -0.002056 |
| O | -0.487037 | 3.869380  | 1.197502  |
| O | 0.938738  | 4.137232  | -0.856679 |
| C | -1.238764 | 2.674094  | -0.999320 |
| H | -1.865715 | 2.025170  | -0.389277 |
| H | -1.790567 | 3.558463  | -1.322724 |
| H | -0.836926 | 2.131131  | -1.854550 |
| C | -3.012736 | -2.367245 | -0.493994 |
| C | -4.338669 | -2.782091 | -0.401866 |
| C | -5.301352 | -1.944949 | 0.163222  |
| C | -4.927070 | -0.691762 | 0.649107  |
| C | -3.598943 | -0.280816 | 0.574679  |
| H | -2.268816 | -3.014245 | -0.946466 |
| H | -4.622158 | -3.759636 | -0.779110 |
| H | -6.335832 | -2.267192 | 0.225679  |
| H | -5.668052 | -0.035108 | 1.094028  |
| H | -3.308447 | 0.686473  | 0.974131  |

TS\_A\_B\_R1Ph\_R2Ph\_XNMs\_Mee3\_rot  
 SCF Energy: -1295.35606568  
 Num. Imaginary Frequencies: 1  
 Imaginary Frequency: -481.9082

|   |           |           |           |
|---|-----------|-----------|-----------|
| C | -1.089446 | 0.102802  | -1.091672 |
| N | -1.230527 | 1.255399  | -1.770631 |
| N | -1.017823 | 2.388930  | -1.725692 |
| C | -2.332128 | -0.343039 | -0.397420 |
| C | -3.108957 | 0.591969  | 0.305213  |
| C | -2.733229 | -1.684563 | -0.400853 |
| C | -4.252599 | 0.193100  | 0.987403  |
| H | -2.803490 | 1.634746  | 0.320735  |
| C | -3.876491 | -2.084376 | 0.291976  |
| H | -2.168550 | -2.426420 | -0.956148 |
| C | -4.639054 | -1.149551 | 0.987740  |
| H | -4.841586 | 0.929413  | 1.525016  |
| H | -4.172570 | -3.128479 | 0.277476  |
| H | -5.529482 | -1.461183 | 1.524161  |
| C | 0.613836  | -0.038356 | 1.205296  |
| H | -0.260213 | -0.637376 | 1.493004  |
| C | 0.142169  | 1.159232  | 0.463556  |
| C | 0.085369  | 2.372619  | 0.220051  |
| C | 0.573433  | -1.742333 | -0.613371 |
| H | -0.150763 | -2.292077 | -0.006127 |
| H | 1.214787  | -2.473727 | -1.104156 |
| C | -0.128206 | -0.901154 | -1.690440 |
| H | 0.632971  | -0.364423 | -2.264980 |
| H | -0.639011 | -1.584166 | -2.382096 |
| N | 1.383239  | -0.967047 | 0.333922  |
| C | 1.355883  | 0.322988  | 2.491667  |
| H | 2.232004  | 0.941375  | 2.286462  |
| H | 0.679229  | 0.893045  | 3.131998  |
| H | 1.653501  | -0.585253 | 3.023959  |
| C | 0.293514  | 3.825557  | 0.336859  |
| H | 0.879894  | 4.191140  | -0.510937 |
| H | -0.660773 | 4.360011  | 0.326509  |
| H | 0.825243  | 4.075003  | 1.259872  |
| S | 2.928606  | -0.561779 | -0.151298 |
| O | 3.161011  | 0.871703  | 0.009715  |
| O | 3.145186  | -1.169530 | -1.465960 |
| C | 3.979999  | -1.413220 | 1.005652  |
| H | 5.007919  | -1.215058 | 0.698412  |

|   |          |           |          |
|---|----------|-----------|----------|
| H | 3.792925 | -1.019150 | 2.003965 |
| H | 3.751905 | -2.477355 | 0.950477 |

TS\_B\_C\_R1Ph\_R2Ph\_XNMs\_Meax\_Ph

SCF Energy: -1487.08916590

Num. Imaginary Frequencies: 1

Imaginary Frequency: -549.9396

|   |           |           |           |
|---|-----------|-----------|-----------|
| C | 0.276346  | 1.210556  | -1.182815 |
| N | -0.144528 | 0.694770  | -2.383230 |
| N | -0.792839 | -0.430593 | -2.141636 |
| C | -1.120180 | 1.848646  | -0.258141 |
| C | -2.452006 | 1.625061  | -0.644544 |
| C | -0.813735 | 2.988136  | 0.489635  |
| C | -3.440716 | 2.531195  | -0.296337 |
| H | -2.717408 | 0.741043  | -1.215006 |
| C | -1.818446 | 3.888985  | 0.848162  |
| H | 0.202681  | 3.217655  | 0.777199  |
| C | -3.133566 | 3.667257  | 0.460581  |
| H | -4.462974 | 2.340229  | -0.605539 |
| H | -1.553959 | 4.769578  | 1.424105  |
| H | -3.914482 | 4.365758  | 0.741446  |
| C | 0.714591  | 0.120594  | 1.144669  |
| H | 0.686467  | -0.952725 | 1.347709  |
| C | -0.118432 | 0.304578  | -0.114654 |
| C | -0.790065 | -0.726622 | -0.829727 |
| C | 1.513994  | 2.065175  | -1.093847 |
| H | 1.294229  | 3.133276  | -1.169954 |
| H | 2.121704  | 1.786901  | -1.956057 |
| C | 2.315453  | 1.785002  | 0.207042  |
| H | 3.379194  | 1.925426  | 0.004755  |
| H | 2.066255  | 2.499595  | 0.994572  |
| N | 2.120441  | 0.447958  | 0.796559  |
| C | 0.311975  | 0.828375  | 2.437812  |
| H | 0.842245  | 0.357359  | 3.267553  |
| H | 0.551553  | 1.891196  | 2.443045  |
| H | -0.763960 | 0.731272  | 2.603753  |
| C | -1.471549 | -1.902170 | -0.288756 |
| S | 2.980010  | -0.778827 | 0.027381  |
| O | 2.394576  | -2.048432 | 0.453298  |
| O | 3.092500  | -0.500255 | -1.405355 |
| C | 4.595915  | -0.627208 | 0.754369  |
| H | 5.217578  | -1.383480 | 0.273280  |
| H | 4.989450  | 0.369052  | 0.554662  |
| H | 4.502664  | -0.811952 | 1.823313  |
| C | -1.955303 | -1.899058 | 1.026596  |
| C | -2.604077 | -3.018932 | 1.545331  |
| C | -2.783064 | -4.151376 | 0.753290  |
| C | -2.311270 | -4.158329 | -0.562497 |
| C | -1.659111 | -3.045440 | -1.081170 |
| H | -1.846882 | -1.007598 | 1.638704  |
| H | -2.975943 | -3.001210 | 2.564911  |
| H | -3.288474 | -5.023604 | 1.155377  |
| H | -2.447560 | -5.038715 | -1.182741 |
| H | -1.281189 | -3.049805 | -2.098569 |

TS\_B\_C\_R1Ph\_R2Ph\_XNMs\_Mee3\_Ph.0

SCF Energy: -1487.09823779

Num. Imaginary Frequencies: 1

Imaginary Frequency: -526.2467

|   |           |           |           |
|---|-----------|-----------|-----------|
| C | 0.163669  | 0.899107  | 1.698854  |
| N | -0.865578 | 1.149474  | 2.574089  |
| N | -1.950716 | 0.559564  | 2.112373  |
| C | -0.073674 | 1.809453  | 0.173029  |
| C | 1.067532  | 2.101517  | -0.575954 |
| C | -1.231926 | 2.582269  | 0.008275  |
| C | 1.049899  | 3.168244  | -1.479227 |
| H | 1.975267  | 1.522366  | -0.467146 |
| C | -1.231756 | 3.645758  | -0.879785 |
| H | -2.130197 | 2.358068  | 0.574928  |
| C | -0.090850 | 3.944357  | -1.634186 |
| H | 1.944717  | 3.381988  | -2.054301 |
| H | -2.132408 | 4.240375  | -0.991192 |
| H | -0.100847 | 4.772307  | -2.335064 |
| C | 0.575249  | -0.917746 | -0.141101 |
| H | 0.555179  | -0.666483 | -1.204608 |
| C | -0.325662 | 0.015714  | 0.647306  |
| C | -1.697444 | -0.132799 | 0.984118  |
| C | 2.201138  | -0.456522 | 1.754878  |
| H | 3.277418  | -0.458360 | 1.933424  |
| H | 1.751277  | -1.267075 | 2.341914  |
| C | 1.598443  | 0.893044  | 2.161848  |
| H | 1.604801  | 0.999725  | 3.248864  |
| H | 2.181698  | 1.711546  | 1.734826  |
| N | 1.961303  | -0.685404 | 0.323095  |
| C | 0.151067  | -2.376668 | 0.056147  |
| H | 0.772750  | -3.020455 | -0.570413 |
| H | 0.263553  | -2.675477 | 1.102315  |
| H | -0.888652 | -2.528317 | -0.237690 |
| C | -2.778584 | -0.736008 | 0.199563  |
| S | 3.235059  | -1.078327 | -0.646045 |
| O | 4.320668  | -0.153353 | -0.325490 |
| C | 3.790420  | -2.706655 | -0.178013 |
| O | 2.713389  | -1.135627 | -2.009741 |
| H | 3.001776  | -3.424882 | -0.397809 |
| H | 4.682742  | -2.916456 | -0.769489 |
| H | 4.031981  | -2.696561 | 0.885610  |
| C | -2.687516 | -0.786440 | -1.198278 |
| C | -3.719119 | -1.340637 | -1.953715 |
| C | -4.855868 | -1.843479 | -1.321637 |
| C | -4.957958 | -1.784960 | 0.070396  |
| C | -3.928365 | -1.234904 | 0.827886  |
| H | -1.812695 | -0.374970 | -1.696866 |
| H | -3.636701 | -1.372488 | -3.035485 |
| H | -5.659539 | -2.275814 | -1.909046 |
| H | -5.841705 | -2.173946 | 0.566383  |
| H | -4.001060 | -1.191335 | 1.910088  |

TS\_B\_C\_R1Ph\_R2Ph\_XNMs\_Mee3\_Ph

SCF Energy: -1487.09823779

Num. Imaginary Frequencies: 1

Imaginary Frequency: -526.2468

|   |           |          |           |
|---|-----------|----------|-----------|
| C | 0.163669  | 0.899107 | 1.698854  |
| N | -0.865578 | 1.149474 | 2.574089  |
| N | -1.950716 | 0.559564 | 2.112373  |
| C | -0.073674 | 1.809453 | 0.173029  |
| C | 1.067532  | 2.101517 | -0.575954 |
| C | -1.231926 | 2.582269 | 0.008275  |
| C | 1.049899  | 3.168244 | -1.479227 |
| H | 1.975267  | 1.522366 | -0.467146 |
| C | -1.231756 | 3.645758 | -0.879785 |

|   |           |           |           |
|---|-----------|-----------|-----------|
| H | -2.130197 | 2.358068  | 0.574928  |
| C | -0.090850 | 3.944357  | -1.634186 |
| H | 1.944717  | 3.381988  | -2.054301 |
| H | -2.132408 | 4.240375  | -0.991192 |
| H | -0.100847 | 4.772307  | -2.335064 |
| C | 0.575249  | -0.917746 | -0.141101 |
| H | 0.555179  | -0.666483 | -1.204608 |
| C | -0.325662 | 0.015714  | 0.647306  |
| C | -1.697444 | -0.132799 | 0.984118  |
| C | 2.201138  | -0.456522 | 1.754878  |
| H | 3.277418  | -0.458360 | 1.933424  |
| H | 1.751277  | -1.267075 | 2.341914  |
| C | 1.598443  | 0.893044  | 2.161848  |
| H | 1.604801  | 0.999725  | 3.248864  |
| H | 2.181698  | 1.711546  | 1.734826  |
| N | 1.961303  | -0.685404 | 0.323095  |
| C | 0.151067  | -2.376668 | 0.056147  |
| H | 0.772750  | -3.020455 | -0.570413 |
| H | 0.263553  | -2.675477 | 1.102315  |
| H | -0.888652 | -2.528317 | -0.237690 |
| C | -2.778584 | -0.736008 | 0.199563  |
| S | 3.235059  | -1.078327 | -0.646045 |
| O | 4.320668  | -0.153353 | -0.325490 |
| C | 3.790420  | -2.706655 | -0.178013 |
| O | 2.713389  | -1.135627 | -2.009741 |
| H | 3.001776  | -3.424882 | -0.397809 |
| H | 4.682742  | -2.916456 | -0.769489 |
| H | 4.031981  | -2.696561 | 0.885610  |
| C | -2.687516 | -0.786440 | -1.198278 |
| C | -3.719119 | -1.340637 | -1.953715 |
| C | -4.855868 | -1.843479 | -1.321637 |
| C | -4.957958 | -1.784960 | 0.070396  |
| C | -3.928365 | -1.234904 | 0.827886  |
| H | -1.812695 | -0.374970 | -1.696866 |
| H | -3.636701 | -1.372488 | -3.035485 |
| H | -5.659539 | -2.275814 | -1.909046 |
| H | -5.841705 | -2.173946 | 0.566383  |
| H | -4.001060 | -1.191335 | 1.910088  |

TS\_B\_D\_R1Ph\_R2Ph\_XNMs\_Meax\_Ph  
 SCF Energy: -1487.09223534  
 Num. Imaginary Frequencies: 1  
 Imaginary Frequency: -601.8990

|   |           |           |           |
|---|-----------|-----------|-----------|
| C | -1.124783 | 0.347617  | -0.750696 |
| N | -1.446066 | -0.682389 | -1.673072 |
| N | -0.598623 | -1.687000 | -1.488055 |
| C | -2.665144 | -0.526451 | -0.381511 |
| C | -2.653960 | -1.394490 | 0.710419  |
| C | -3.859166 | 0.018333  | -0.851519 |
| C | -3.850106 | -1.684856 | 1.356708  |
| H | -1.723405 | -1.835668 | 1.054607  |
| C | -5.049585 | -0.273972 | -0.187029 |
| H | -3.868552 | 0.630581  | -1.746460 |
| C | -5.051515 | -1.120358 | 0.919903  |
| H | -3.839614 | -2.351965 | 2.212687  |
| H | -5.978774 | 0.148130  | -0.555913 |
| H | -5.979939 | -1.349927 | 1.431643  |
| C | 0.659806  | 0.791372  | 1.024558  |
| H | 1.734152  | 0.581450  | 1.049040  |
| C | 0.013747  | -0.072437 | -0.021534 |
| C | 0.312855  | -1.327782 | -0.541754 |

|   |           |           |           |
|---|-----------|-----------|-----------|
| C | -1.358671 | 1.820645  | -0.980435 |
| H | -2.402840 | 2.063234  | -1.179664 |
| H | -0.773970 | 2.115958  | -1.859879 |
| C | -0.875785 | 2.595209  | 0.249196  |
| H | -0.895554 | 3.667240  | 0.058405  |
| H | -1.528895 | 2.396970  | 1.103831  |
| N | 0.488827  | 2.224467  | 0.666438  |
| C | 0.078217  | 0.562745  | 2.423891  |
| H | 0.579676  | 1.211053  | 3.146607  |
| H | -0.994769 | 0.771366  | 2.443828  |
| H | 0.209163  | -0.478444 | 2.728729  |
| C | 1.444354  | -2.229760 | -0.251581 |
| S | 1.733946  | 2.869241  | -0.249613 |
| C | 2.946917  | 3.270222  | 0.987876  |
| O | 2.313344  | 1.859287  | -1.137623 |
| O | 1.230468  | 4.110888  | -0.836768 |
| H | 3.814899  | 3.662262  | 0.456244  |
| H | 2.516479  | 4.018039  | 1.652027  |
| H | 3.212990  | 2.362966  | 1.531083  |
| C | 2.087715  | -2.233043 | 0.991630  |
| C | 3.163790  | -3.086686 | 1.229616  |
| C | 3.609507  | -3.946810 | 0.227707  |
| C | 2.970809  | -3.952544 | -1.013685 |
| C | 1.895718  | -3.102063 | -1.252268 |
| H | 1.738895  | -1.587481 | 1.790074  |
| H | 3.648604  | -3.081724 | 2.200583  |
| H | 4.448135  | -4.610508 | 0.412686  |
| H | 3.313538  | -4.619201 | -1.798613 |
| H | 1.398875  | -3.098485 | -2.216734 |

TS\_B\_D\_R1Ph\_R2Ph\_XNMs\_Mee3\_Ph  
 SCF Energy: -1487.09518987  
 Num. Imaginary Frequencies: 1  
 Imaginary Frequency: -568.8536

|   |           |           |           |
|---|-----------|-----------|-----------|
| C | 0.495975  | -0.597632 | -1.243485 |
| N | -0.168924 | -1.785589 | -1.668469 |
| N | -1.416762 | -1.741508 | -1.240109 |
| C | 1.019262  | -2.048911 | -0.329113 |
| C | 2.195771  | -2.658576 | -0.759180 |
| C | 0.540171  | -2.238366 | 0.965205  |
| C | 2.936841  | -3.417485 | 0.146582  |
| H | 2.523099  | -2.558456 | -1.788554 |
| C | 1.286562  | -3.002018 | 1.855455  |
| H | -0.396825 | -1.788559 | 1.280536  |
| C | 2.492655  | -3.585023 | 1.456603  |
| H | 3.855792  | -3.889296 | -0.185614 |
| H | 0.923777  | -3.136483 | 2.869335  |
| H | 3.070497  | -4.176422 | 2.158536  |
| C | -0.204365 | 1.634998  | -0.149640 |
| H | -0.231899 | 1.705827  | 0.944203  |
| C | -0.474195 | 0.220538  | -0.599376 |
| C | -1.635724 | -0.542256 | -0.627195 |
| C | 1.565158  | 1.539926  | -1.901515 |
| H | 2.507739  | 2.016167  | -2.168335 |
| H | 0.800394  | 1.897269  | -2.596368 |
| C | 1.682225  | 0.013583  | -1.965404 |
| H | 1.690727  | -0.323272 | -3.006038 |
| H | 2.630158  | -0.296008 | -1.517489 |
| N | 1.164595  | 2.010823  | -0.570147 |
| C | -1.203018 | 2.650080  | -0.713298 |
| H | -1.164137 | 2.662622  | -1.805756 |

|   |           |           |           |
|---|-----------|-----------|-----------|
| H | -2.221969 | 2.397748  | -0.413361 |
| H | -0.955383 | 3.644323  | -0.335935 |
| C | -2.976037 | -0.247290 | -0.084623 |
| S | 2.310886  | 2.165385  | 0.614101  |
| O | 1.750788  | 3.059842  | 1.625326  |
| C | 2.529896  | 0.580050  | 1.408053  |
| O | 3.558055  | 2.519559  | -0.059653 |
| H | 3.235535  | 0.737167  | 2.225533  |
| H | 1.565624  | 0.250330  | 1.798587  |
| H | 2.926804  | -0.138084 | 0.688819  |
| C | -3.122800 | 0.432439  | 1.130061  |
| C | -4.391809 | 0.695771  | 1.640747  |
| C | -5.525271 | 0.281256  | 0.941055  |
| C | -5.384872 | -0.404145 | -0.266545 |
| C | -4.116664 | -0.671838 | -0.776094 |
| H | -2.242442 | 0.744037  | 1.686321  |
| H | -4.494615 | 1.220106  | 2.585296  |
| H | -6.514305 | 0.488432  | 1.337088  |
| H | -6.264518 | -0.729847 | -0.812476 |
| H | -3.999904 | -1.205648 | -1.714004 |

TS\_B\_E\_R1Ph\_R2Ph\_XNMs\_Meec  
 SCF Energy: -1487.08603765  
 Num. Imaginary Frequencies: 1  
 Imaginary Frequency: -565.0357

|   |           |           |           |
|---|-----------|-----------|-----------|
| C | 1.578332  | -1.106318 | -0.481903 |
| N | 1.330806  | -2.215807 | -1.221255 |
| N | 0.027711  | -2.480300 | -1.154981 |
| C | 2.973759  | -0.797229 | -0.076407 |
| C | 3.320029  | -0.721725 | 1.277073  |
| C | 3.971735  | -0.664732 | -1.048154 |
| C | 4.641818  | -0.484601 | 1.651447  |
| H | 2.565167  | -0.879028 | 2.042172  |
| C | 5.291584  | -0.428419 | -0.672791 |
| H | 3.717075  | -0.763668 | -2.099985 |
| C | 5.627477  | -0.329074 | 0.677986  |
| H | 4.900569  | -0.431188 | 2.703901  |
| H | 6.057951  | -0.326636 | -1.434255 |
| H | 6.655912  | -0.143134 | 0.970234  |
| C | 0.161953  | 0.510394  | 1.082423  |
| H | 1.129920  | 0.624119  | 1.579314  |
| C | 0.318605  | -0.614936 | 0.071251  |
| C | -0.612904 | -1.579565 | -0.399542 |
| C | 1.057076  | 1.754693  | -0.715339 |
| H | 2.047216  | 1.851879  | -0.257217 |
| H | 0.932486  | 2.577742  | -1.424028 |
| C | 0.953673  | 0.449197  | -1.476586 |
| H | 0.026949  | 0.311592  | -2.028931 |
| H | 1.814319  | 0.303651  | -2.126542 |
| N | 0.056006  | 1.809558  | 0.352426  |
| C | -0.856180 | 0.226564  | 2.179653  |
| H | -1.856689 | 0.037791  | 1.797711  |
| H | -0.509967 | -0.656189 | 2.724444  |
| H | -0.896627 | 1.071846  | 2.868880  |
| C | -2.070260 | -1.707706 | -0.178088 |
| S | -1.383490 | 2.543522  | -0.087421 |
| C | -0.973808 | 4.265571  | 0.086569  |
| O | -1.665017 | 2.293349  | -1.505225 |
| O | -2.402069 | 2.206017  | 0.898997  |
| H | -1.861864 | 4.819896  | -0.220562 |
| H | -0.733509 | 4.450482  | 1.132395  |

|   |           |           |           |
|---|-----------|-----------|-----------|
| H | -0.132826 | 4.505814  | -0.563545 |
| C | -2.567467 | -2.873900 | 0.416553  |
| C | -3.935315 | -3.027145 | 0.632753  |
| C | -4.820199 | -2.015006 | 0.258060  |
| C | -4.331288 | -0.856745 | -0.345640 |
| C | -2.963576 | -0.706194 | -0.570118 |
| H | -1.873116 | -3.653983 | 0.714764  |
| H | -4.309574 | -3.933499 | 1.098497  |
| H | -5.885372 | -2.130904 | 0.432160  |
| H | -5.014346 | -0.069492 | -0.649321 |
| H | -2.593069 | 0.188736  | -1.060071 |

TS\_B\_E\_R1Ph\_R2Ph\_XNMs\_Mee3\_Ph  
 SCF Energy: -1487.08603765  
 Num. Imaginary Frequencies: 1  
 Imaginary Frequency: -565.0357

|   |           |           |           |
|---|-----------|-----------|-----------|
| C | 1.578332  | -1.106318 | -0.481903 |
| N | 1.330806  | -2.215807 | -1.221255 |
| N | 0.027711  | -2.480300 | -1.154981 |
| C | 2.973759  | -0.797229 | -0.076407 |
| C | 3.320029  | -0.721725 | 1.277073  |
| C | 3.971735  | -0.664732 | -1.048154 |
| C | 4.641818  | -0.484601 | 1.651447  |
| H | 2.565167  | -0.879028 | 2.042172  |
| C | 5.291584  | -0.428419 | -0.672791 |
| H | 3.717075  | -0.763668 | -2.099985 |
| C | 5.627477  | -0.329074 | 0.677986  |
| H | 4.900569  | -0.431188 | 2.703901  |
| H | 6.057951  | -0.326636 | -1.434255 |
| H | 6.655912  | -0.143134 | 0.970234  |
| C | 0.161953  | 0.510394  | 1.082423  |
| H | 1.129920  | 0.624119  | 1.579314  |
| C | 0.318605  | -0.614936 | 0.071251  |
| C | -0.612904 | -1.579565 | -0.399542 |
| C | 1.057076  | 1.754693  | -0.715339 |
| H | 2.047216  | 1.851879  | -0.257217 |
| H | 0.932486  | 2.577742  | -1.424028 |
| C | 0.953673  | 0.449197  | -1.476586 |
| H | 0.026949  | 0.311592  | -2.028931 |
| H | 1.814319  | 0.303651  | -2.126542 |
| N | 0.056006  | 1.809558  | 0.352426  |
| C | -0.856180 | 0.226564  | 2.179653  |
| H | -1.856689 | 0.037791  | 1.797711  |
| H | -0.509967 | -0.656189 | 2.724444  |
| H | -0.896627 | 1.071846  | 2.868880  |
| C | -2.070260 | -1.707706 | -0.178088 |
| S | -1.383490 | 2.543522  | -0.087421 |
| C | -0.973808 | 4.265571  | 0.086569  |
| O | -1.665017 | 2.293349  | -1.505225 |
| O | -2.402069 | 2.206017  | 0.898997  |
| H | -1.861864 | 4.819896  | -0.220562 |
| H | -0.733509 | 4.450482  | 1.132395  |
| H | -0.132826 | 4.505814  | -0.563545 |
| C | -2.567467 | -2.873900 | 0.416553  |
| C | -3.935315 | -3.027145 | 0.632753  |
| C | -4.820199 | -2.015006 | 0.258060  |
| C | -4.331288 | -0.856745 | -0.345640 |
| C | -2.963576 | -0.706194 | -0.570118 |
| H | -1.873116 | -3.653983 | 0.714764  |
| H | -4.309574 | -3.933499 | 1.098497  |
| H | -5.885372 | -2.130904 | 0.432160  |

|   |           |           |           |
|---|-----------|-----------|-----------|
| H | -5.014346 | -0.069492 | -0.649321 |
| H | -2.593069 | 0.188736  | -1.060071 |

Set 4 of Cartesians:

Ph\_nochain\_HPh:

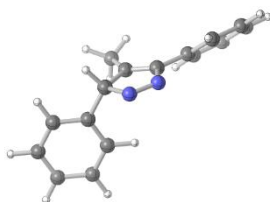

| FILE                  | SCF E       | SCF+ZPVE    | H           | TS         | G           |
|-----------------------|-------------|-------------|-------------|------------|-------------|
| B_Ph_nochain_HPh      | -456404.193 | -456240.149 | -456230.41  | 37.1222006 | -456267.532 |
| TS_B_C_Ph_nochain_HPh | -456374.775 | -456211.501 | -456202.207 | 35.1649988 | -456237.372 |
| TS_B_D_Ph_nochain_HPh | -456369.386 | -456206.553 | -456197.122 | 35.8646718 | -456232.987 |
| TS_B_E_Ph_nochain_HPh | -456383.525 | -456221.602 | -456212.011 | 36.4934362 | -456248.504 |

B\_Ph\_nochain\_HPh

SCF Energy: -727.326473058

Num. Imaginary Frequencies: 0

|   |           |           |           |
|---|-----------|-----------|-----------|
| C | 1.191098  | 1.046906  | 0.625715  |
| N | 0.656984  | 1.995351  | -0.374051 |
| N | -0.539646 | 1.728376  | -0.609192 |
| C | 2.437133  | 0.345656  | 0.126076  |
| C | 3.640435  | 0.435662  | 0.824878  |
| C | 2.373917  | -0.417338 | -1.044641 |
| C | 4.775090  | -0.231608 | 0.359044  |
| H | 3.693041  | 1.028656  | 1.733833  |
| C | 3.505578  | -1.078796 | -1.512023 |
| H | 1.434843  | -0.489414 | -1.589416 |
| C | 4.709477  | -0.987750 | -0.808963 |
| H | 5.707741  | -0.156623 | 0.909094  |
| H | 3.450263  | -1.665402 | -2.423536 |
| H | 5.591542  | -1.504918 | -1.172915 |
| C | 0.109120  | -0.978732 | 1.900259  |
| H | 0.560435  | -1.863564 | 1.435492  |
| C | 0.035464  | 0.142174  | 0.920424  |
| C | -0.977004 | 0.581862  | 0.146244  |
| H | 1.443939  | 1.651859  | 1.508462  |
| H | -0.881367 | -1.253740 | 2.268880  |
| C | -2.357900 | 0.109962  | -0.022661 |
| C | -2.674013 | -1.251234 | 0.086940  |
| C | -3.990244 | -1.683451 | -0.060985 |
| C | -5.004300 | -0.764080 | -0.329194 |
| C | -4.694656 | 0.590893  | -0.455483 |
| C | -3.380694 | 1.026407  | -0.305796 |
| H | -1.884995 | -1.976081 | 0.262587  |
| H | -4.221366 | -2.740682 | 0.022300  |
| H | -6.028838 | -1.102345 | -0.447081 |
| H | -5.478470 | 1.310281  | -0.670569 |
| H | -3.138485 | 2.079903  | -0.403819 |
| H | 0.739340  | -0.703208 | 2.750383  |

Imaginary Frequency: -541.4483

|   |           |           |           |
|---|-----------|-----------|-----------|
| C | 1.330299  | 1.914886  | 0.246373  |
| N | 0.759301  | 2.437357  | -0.878013 |
| N | -0.420341 | 1.856119  | -1.040341 |
| C | 1.877976  | 0.250319  | 0.017002  |
| C | 2.941151  | -0.104860 | 0.850160  |
| C | 1.666918  | -0.429220 | -1.187369 |
| C | 3.796374  | -1.141238 | 0.476254  |
| H | 3.116986  | 0.428295  | 1.779219  |
| C | 2.526545  | -1.456018 | -1.551148 |
| H | 0.835860  | -0.155924 | -1.831127 |
| C | 3.592843  | -1.819924 | -0.721490 |
| H | 4.624552  | -1.406814 | 1.124864  |
| H | 2.357867  | -1.982459 | -2.484760 |
| H | 4.256373  | -2.627708 | -1.011278 |
| C | 0.378126  | 0.499459  | 2.300473  |
| H | 0.615604  | -0.562079 | 2.398624  |
| C | 0.415539  | 0.965916  | 0.868894  |
| C | -0.675646 | 0.989462  | -0.047582 |
| H | 2.168923  | 2.413402  | 0.714094  |
| H | -0.630450 | 0.662770  | 2.689225  |
| C | -1.898002 | 0.180529  | -0.020944 |
| C | -1.903312 | -1.088228 | 0.574603  |
| C | -3.066234 | -1.857188 | 0.590795  |
| C | -4.235378 | -1.371254 | 0.007816  |
| C | -4.235061 | -0.111435 | -0.596444 |
| C | -3.077642 | 0.659860  | -0.611066 |
| H | -0.989994 | -1.485027 | 1.008256  |
| H | -3.054799 | -2.839324 | 1.052918  |
| H | -5.140980 | -1.969298 | 0.021263  |
| H | -5.142495 | 0.272080  | -1.052484 |
| H | -3.074775 | 1.642128  | -1.072945 |
| H | 1.077636  | 1.069227  | 2.914652  |

TS\_B\_D\_Ph\_nochain\_HPh

SCF Energy: -727.271005283

Num. Imaginary Frequencies: 1

Imaginary Frequency: -590.2225

TS\_B\_C\_Ph\_nochain\_HPh

SCF Energy: -727.279592708

Num. Imaginary Frequencies: 1

|   |           |           |           |
|---|-----------|-----------|-----------|
| C | -1.107814 | -1.501646 | 0.206086  |
| N | -0.994739 | -1.036767 | -1.136787 |
| N | 0.191465  | -0.473281 | -1.294550 |
| C | -2.119197 | -0.036440 | -0.139844 |
| C | -3.460183 | -0.235739 | -0.461193 |
| C | -1.675736 | 1.188303  | 0.355597  |
| C | -4.374381 | 0.793978  | -0.236223 |
| H | -3.791382 | -1.164784 | -0.908787 |
| C | -2.596429 | 2.207934  | 0.567053  |
| H | -0.624980 | 1.345229  | 0.576983  |
| C | -3.950864 | 2.015487  | 0.281194  |
| H | -5.418271 | 0.637500  | -0.488371 |
| H | -2.251299 | 3.157794  | 0.962668  |
| H | -4.663610 | 2.815585  | 0.450030  |
| H | 0.404300  | -1.505793 | 1.846088  |
| C | 0.133323  | -1.239340 | 0.834956  |
| C | 0.899034  | -0.616420 | -0.136721 |
| C | -2.038982 | -2.619933 | 0.601280  |
| H | -1.445493 | -3.508853 | 0.823990  |
| H | -2.725602 | -2.865506 | -0.207728 |
| C | 2.289300  | -0.130374 | -0.050490 |
| C | 2.944544  | -0.059519 | 1.184972  |
| C | 4.259087  | 0.393834  | 1.261334  |
| C | 4.933625  | 0.782916  | 0.103494  |
| C | 4.285510  | 0.716936  | -1.130505 |
| C | 2.970638  | 0.264740  | -1.208717 |
| H | 2.424020  | -0.351943 | 2.092146  |
| H | 4.755532  | 0.446397  | 2.225072  |
| H | 5.958074  | 1.136584  | 0.163165  |
| H | 4.805411  | 1.018226  | -2.034478 |
| H | 2.461278  | 0.211145  | -2.165067 |
| H | -2.613914 | -2.349541 | 1.490018  |

TS\_B\_E\_Ph\_nochain\_HPh  
SCF Energy: -727.293536730

Num. Imaginary Frequencies: 1  
Imaginary Frequency: -996.3448

|   |           |           |           |
|---|-----------|-----------|-----------|
| C | 1.121680  | -0.476512 | -0.181818 |
| N | 0.652851  | -1.762414 | -0.071297 |
| N | -0.658309 | -1.728294 | -0.007594 |
| C | 2.564568  | -0.154349 | -0.052755 |
| C | 2.996972  | 0.833614  | 0.836329  |
| C | 3.502963  | -0.879020 | -0.794970 |
| C | 4.358381  | 1.101108  | 0.974379  |
| H | 2.273164  | 1.382078  | 1.431572  |
| C | 4.862002  | -0.613545 | -0.651226 |
| H | 3.160307  | -1.649177 | -1.479583 |
| C | 5.291307  | 0.379769  | 0.230743  |
| H | 4.688557  | 1.867588  | 1.667962  |
| H | 5.585969  | -1.178439 | -1.229520 |
| H | 6.350804  | 0.588351  | 0.339678  |
| C | 0.006579  | 1.933520  | -0.134224 |
| H | 0.933749  | 2.307536  | -0.573550 |
| C | -0.034266 | 0.436011  | -0.157354 |
| C | -1.116075 | -0.457030 | -0.064001 |
| H | 0.657024  | -0.068583 | -1.260170 |
| H | -0.035221 | 2.274514  | 0.904797  |
| C | -2.560975 | -0.166116 | -0.020458 |
| C | -3.374140 | -0.857077 | 0.886986  |
| C | -4.743054 | -0.606088 | 0.939644  |
| C | -5.315835 | 0.340963  | 0.089645  |
| C | -4.513390 | 1.027599  | -0.821269 |
| C | -3.144387 | 0.773050  | -0.879692 |
| H | -2.922313 | -1.588438 | 1.550188  |
| H | -5.362484 | -1.146969 | 1.648179  |
| H | -6.382119 | 0.538701  | 0.133381  |
| H | -4.954405 | 1.754556  | -1.495971 |
| H | -2.533162 | 1.285459  | -1.616737 |
| H | -0.835631 | 2.372398  | -0.667740 |

Ph\_nochain\_MePh:

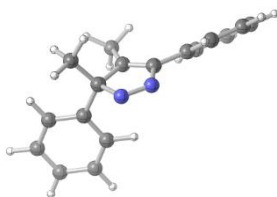

| FILE                   | SCF E       | SCF+ZPVE    | H           | TS         | G           |
|------------------------|-------------|-------------|-------------|------------|-------------|
| B_Ph_nochain_MePh      | -481064.829 | -480882.994 | -480872.43  | 38.4418528 | -480910.872 |
| TS_B_C_Ph_nochain_MePh | -481036.747 | -480856.11  | -480845.741 | 37.4315627 | -480883.172 |
| TS_B_D_Ph_nochain_MePh | -481030.949 | -480850.51  | -480840.099 | 37.6022453 | -480877.701 |
| TS_B_E_Ph_nochain_MePh | -481032.186 | -480851.366 | -480840.997 | 37.6894691 | -480878.687 |

B\_Ph\_nochain\_MePh  
 SCF Energy: -766.625704449  
 Num. Imaginary Frequencies: 0

|   |           |           |           |
|---|-----------|-----------|-----------|
| C | -1.160136 | -1.130205 | 0.061931  |
| N | -0.623386 | -1.483761 | -1.278209 |
| N | 0.573803  | -1.146036 | -1.366300 |
| C | -2.326755 | -0.158120 | -0.105681 |
| C | -3.577985 | -0.383712 | 0.467567  |
| C | -2.118535 | 1.014478  | -0.843140 |
| C | -4.606870 | 0.548421  | 0.306163  |
| H | -3.767788 | -1.283734 | 1.042338  |
| C | -3.142949 | 1.940351  | -1.008360 |
| H | -1.144974 | 1.199985  | -1.291802 |
| C | -4.393997 | 1.709381  | -0.431012 |
| H | -5.575235 | 0.359161  | 0.758578  |
| H | -2.966953 | 2.841590  | -1.587064 |
| H | -5.194763 | 2.430992  | -0.557377 |
| C | -0.042645 | 0.062291  | 2.124046  |
| H | -0.525719 | 1.046930  | 2.134040  |
| C | 0.013538  | -0.471437 | 0.734877  |
| C | 1.020569  | -0.496022 | -0.159734 |
| C | -1.533499 | -2.456053 | 0.737092  |
| H | -0.656414 | -3.106799 | 0.770324  |
| H | -2.324756 | -2.956195 | 0.174628  |
| H | 0.955053  | 0.164478  | 2.555501  |
| C | 2.403352  | -0.003631 | -0.093015 |
| C | 2.721578  | 1.159584  | 0.621242  |
| C | 4.039116  | 1.608013  | 0.687601  |
| C | 5.052263  | 0.906671  | 0.034046  |
| C | 4.740441  | -0.243162 | -0.692982 |
| C | 3.425205  | -0.695374 | -0.758852 |
| H | 1.932886  | 1.728527  | 1.104193  |
| H | 4.272019  | 2.512180  | 1.241108  |
| H | 6.077773  | 1.258571  | 0.083942  |
| H | 5.523516  | -0.789333 | -1.209413 |
| H | 3.181126  | -1.589410 | -1.324070 |
| H | -1.877068 | -2.283121 | 1.759664  |
| H | -0.637772 | -0.594087 | 2.766242  |

Num. Imaginary Frequencies: 1  
 Imaginary Frequency: -539.6025

|   |           |           |           |
|---|-----------|-----------|-----------|
| C | -1.356531 | -1.660571 | -0.047796 |
| N | -0.807239 | -2.032644 | -1.249527 |
| N | 0.421284  | -1.552311 | -1.319286 |
| C | -1.727261 | 0.090265  | -0.065930 |
| C | -2.691608 | 0.531603  | 0.841128  |
| C | -1.468199 | 0.831780  | -1.225165 |
| C | -3.407732 | 1.702628  | 0.580754  |
| H | -2.894757 | -0.013925 | 1.755412  |
| C | -2.184983 | 1.991806  | -1.475015 |
| H | -0.712725 | 0.497628  | -1.929944 |
| C | -3.161032 | 2.434658  | -0.574188 |
| H | -4.156646 | 2.033318  | 1.292833  |
| H | -1.978984 | 2.557139  | -2.377967 |
| H | -3.715902 | 3.344923  | -0.775107 |
| C | -0.299818 | -0.656425 | 2.185018  |
| H | -0.446094 | 0.395319  | 2.440688  |
| C | -0.354986 | -0.903986 | 0.702365  |
| C | 0.743640  | -0.881958 | -0.200911 |
| C | -2.530695 | -2.445733 | 0.465053  |
| H | -2.234877 | -3.494875 | 0.536505  |
| H | -3.370711 | -2.364275 | -0.228114 |
| H | 0.684956  | -0.962274 | 2.547832  |
| C | 2.030891  | -0.196548 | -0.051048 |
| C | 2.138987  | 0.963177  | 0.728763  |
| C | 3.364261  | 1.615256  | 0.861560  |
| C | 4.494965  | 1.121279  | 0.213150  |
| C | 4.393061  | -0.028607 | -0.573899 |
| C | 3.172941  | -0.683624 | -0.705350 |
| H | 1.257644  | 1.370937  | 1.215284  |
| H | 3.431552  | 2.514474  | 1.465923  |
| H | 5.448870  | 1.628505  | 0.316981  |
| H | 5.269733  | -0.418125 | -1.082103 |
| H | 3.091519  | -1.581298 | -1.310182 |
| H | -1.054102 | -1.246529 | 2.710358  |
| H | -2.853200 | -2.116264 | 1.452350  |

TS\_B\_C\_Ph\_nochain\_MePh  
 SCF Energy: -766.580952230

TS\_B\_D\_Ph\_nochain\_MePh  
 SCF Energy: -766.571712855  
 Num. Imaginary Frequencies: 1



Imaginary Frequency: -599.1046

|   |           |           |           |
|---|-----------|-----------|-----------|
| C | 1.129301  | 1.416036  | -0.074411 |
| N | 1.021084  | 0.824088  | -1.366540 |
| N | -0.166679 | 0.245666  | -1.467228 |
| C | 2.135501  | -0.072961 | -0.294246 |
| C | 3.476621  | 0.092722  | -0.639261 |
| C | 1.702084  | -1.237567 | 0.340451  |
| C | 4.395501  | -0.902738 | -0.307507 |
| H | 3.801743  | 0.969057  | -1.186782 |
| C | 2.628098  | -2.225000 | 0.656592  |
| H | 0.653637  | -1.373585 | 0.586581  |
| C | 3.980057  | -2.062174 | 0.343004  |
| H | 5.437615  | -0.771167 | -0.580642 |
| H | 2.288505  | -3.125739 | 1.157925  |
| H | 4.696793  | -2.836288 | 0.595245  |
| C | -0.447830 | 1.690776  | 1.965077  |
| H | -0.154717 | 0.959681  | 2.729083  |
| C | -0.105352 | 1.209084  | 0.593494  |
| C | -0.864969 | 0.490429  | -0.323755 |
| C | 2.058169  | 2.565687  | 0.215034  |
| H | 1.464040  | 3.470915  | 0.364713  |
| H | 2.735677  | 2.742713  | -0.619199 |
| H | -1.521492 | 1.867497  | 2.066065  |
| C | -2.250753 | 0.000854  | -0.195110 |
| C | -2.740633 | -0.461028 | 1.032602  |
| C | -4.050388 | -0.926599 | 1.138757  |
| C | -4.882700 | -0.935136 | 0.020054  |
| C | -4.397813 | -0.483378 | -1.208840 |
| C | -3.089227 | -0.021000 | -1.317403 |
| H | -2.090232 | -0.478236 | 1.902206  |
| H | -4.417557 | -1.288039 | 2.094104  |
| H | -5.903060 | -1.295783 | 0.103430  |
| H | -5.041101 | -0.490738 | -2.083127 |
| H | -2.705297 | 0.331003  | -2.269743 |
| H | 2.644105  | 2.378622  | 1.118620  |
| H | 0.076492  | 2.623752  | 2.190699  |

SCF Energy: -766.573683105

Num. Imaginary Frequencies: 1

Imaginary Frequency: -623.2538

|   |           |           |           |
|---|-----------|-----------|-----------|
| C | -1.084332 | -0.445747 | 0.188748  |
| N | -0.650712 | -1.731908 | -0.015732 |
| N | 0.666454  | -1.711917 | -0.118776 |
| C | -2.515210 | -0.127000 | -0.048285 |
| C | -2.890173 | 0.885236  | -0.935610 |
| C | -3.502719 | -0.896033 | 0.577827  |
| C | -4.240279 | 1.136736  | -1.180680 |
| H | -2.131632 | 1.465151  | -1.451956 |
| C | -4.849188 | -0.645683 | 0.329803  |
| H | -3.208177 | -1.695707 | 1.252367  |
| C | -5.220582 | 0.375536  | -0.546942 |
| H | -4.523069 | 1.923273  | -1.872842 |
| H | -5.608670 | -1.247059 | 0.818964  |
| H | -6.270518 | 0.572218  | -0.738876 |
| C | 0.074349  | 1.937112  | 0.080019  |
| H | -0.880818 | 2.361527  | 0.395349  |
| C | 0.065634  | 0.441908  | 0.182879  |
| C | 1.142810  | -0.458971 | -0.009787 |
| C | -0.627232 | -0.030223 | 1.958446  |
| H | -0.037288 | -0.887477 | 2.269150  |
| H | -1.667020 | -0.088560 | 2.277923  |
| H | 0.251187  | 2.221299  | -0.961924 |
| C | 2.585587  | -0.176369 | -0.095262 |
| C | 3.377826  | -0.884603 | -1.009793 |
| C | 4.746322  | -0.643212 | -1.095658 |
| C | 5.344503  | 0.313410  | -0.273617 |
| C | 4.565265  | 1.018922  | 0.642594  |
| C | 3.196125  | 0.773277  | 0.734273  |
| H | 2.907429  | -1.622114 | -1.652748 |
| H | 5.346539  | -1.198261 | -1.809940 |
| H | 6.410551  | 0.504492  | -0.344417 |
| H | 5.024061  | 1.754903  | 1.295465  |
| H | 2.606986  | 1.304703  | 1.475955  |
| H | 0.867154  | 2.380644  | 0.684495  |
| H | -0.209139 | 0.911960  | 2.310858  |

TS\_B\_E\_Ph\_nochain\_MePh

Ph\_nochain\_EtPh:

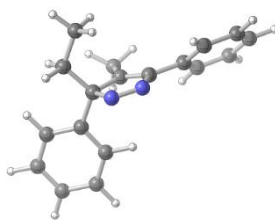

| FILE                   | SCF E       | SCF+ZPVE   | H           | TS         | G           |
|------------------------|-------------|------------|-------------|------------|-------------|
| B_Ph_nochain_EtPh      | -505723.357 | 505523.667 | -505512.199 | 40.4611781 | -505552.66  |
| TS_B_C_Ph_nochain_EtPh | -505695.083 | 505496.455 | -505485.236 | 39.384372  | -505524.621 |
| TS_B_D_Ph_nochain_EtPh | -505688.945 | -505490.42 | -505479.199 | 39.3542515 | -505518.553 |
| TS_B_E_Ph_nochain_EtPh | -505690.246 | 505491.318 | -505480.179 | 39.4352002 | -505519.615 |

|                               |           |           |           |                                |                 |                 |           |
|-------------------------------|-----------|-----------|-----------|--------------------------------|-----------------|-----------------|-----------|
| <b>B_Ph_nochain_5tPh</b>      |           |           | H         | <b>-0.318574</b>               | <b>3.029267</b> | <b>1.188966</b> |           |
| SCF Energy: -805.921574443    |           |           |           |                                |                 |                 |           |
| Num. Imaginary Frequencies: 0 |           |           |           |                                |                 |                 |           |
| C                             | 1.156020  | 0.912620  | -0.119405 | TS_B_C_Ph_nochain_5tPh         |                 |                 |           |
| N                             | 0.634126  | 1.051846  | -1.503654 | SCF Energy: -805.876516979     |                 |                 |           |
| N                             | -0.564170 | 0.710206  | -1.550369 | Num. Imaginary Frequencies: 1  |                 |                 |           |
| C                             | 2.307941  | -0.095660 | -0.140824 | Imaginary Frequency: -535.8415 |                 |                 |           |
| C                             | 3.596615  | 0.218594  | 0.291348  | C                              | -1.415784       | -1.240722       | -0.267918 |
| C                             | 2.049192  | -1.389434 | -0.612369 | N                              | -0.888327       | -1.551697       | -1.495798 |
| C                             | 4.607944  | -0.745616 | 0.258381  | N                              | 0.393031        | -1.228449       | -1.500131 |
| H                             | 3.832611  | 1.211895  | 0.656167  | C                              | -1.560810       | 0.538277        | -0.100637 |
| C                             | 3.055600  | -2.348244 | -0.650049 | C                              | -2.460063       | 1.021905        | 0.850700  |
| H                             | 1.048302  | -1.644806 | -0.953551 | C                              | -1.196782       | 1.344446        | -1.186815 |
| C                             | 4.342425  | -2.028431 | -0.210669 | C                              | -3.007232       | 2.299625        | 0.706767  |
| H                             | 5.604805  | -0.485095 | 0.599959  | H                              | -2.738764       | 0.429750        | 1.714540  |
| H                             | 2.837262  | -3.344538 | -1.021374 | C                              | -1.745477       | 2.610118        | -1.321319 |
| H                             | 5.129659  | -2.775119 | -0.236520 | H                              | -0.490981       | 0.978296        | -1.926122 |
| C                             | 0.003752  | 0.107513  | 2.100551  | C                              | -2.656678       | 3.096349        | -0.375952 |
| H                             | 0.518801  | -0.839633 | 2.301724  | H                              | -3.706568       | 2.661490        | 1.453264  |
| C                             | -0.029184 | 0.381601  | 0.637750  | H                              | -1.458957       | 3.223772        | -2.169085 |
| C                             | -1.028148 | 0.268436  | -0.258164 | H                              | -3.080404       | 4.088851        | -0.486407 |
| C                             | 1.568033  | 2.321630  | 0.355450  | C                              | -0.302360       | -0.633662       | 2.071925  |
| C                             | 0.409476  | 3.314257  | 0.423807  | H                              | -0.300164       | 0.391832        | 2.447763  |
| H                             | 2.342218  | 2.688504  | -0.325810 | C                              | -0.346377       | -0.700934       | 0.569538  |
| H                             | -1.001902 | 0.050458  | 2.521781  | C                              | 0.769619        | -0.725404       | -0.313225 |
| C                             | -2.415980 | -0.194835 | -0.124645 | C                              | -2.671595       | -1.953117       | 0.160880  |
| C                             | -2.746982 | -1.234903 | 0.754553  | C                              | -2.377190       | -3.434208       | 0.418182  |
| C                             | -4.068895 | -1.656349 | 0.882495  | H                              | -3.416602       | -1.838982       | -0.632673 |
| C                             | -5.073472 | -1.051740 | 0.127054  | H                              | 0.614734        | -1.123447       | 2.410072  |
| C                             | -4.748947 | -0.026700 | -0.762857 | C                              | 2.128142        | -0.227680       | -0.077723 |
| C                             | -3.429243 | 0.398641  | -0.890732 | C                              | 2.362494        | 0.813906        | 0.830577  |
| H                             | -1.964207 | -1.731899 | 1.319870  | C                              | 3.655729        | 1.289445        | 1.043969  |
| H                             | -4.311784 | -2.465283 | 1.564218  | C                              | 4.729768        | 0.735378        | 0.349422  |
| H                             | -6.102443 | -1.382927 | 0.224843  | C                              | 4.502963        | -0.296685       | -0.564662 |
| H                             | -5.525590 | 0.442902  | -1.358241 | C                              | 3.214505        | -0.775824       | -0.777172 |
| H                             | -3.175155 | 1.195809  | -1.582470 | H                              | 1.528533        | 1.270430        | 1.355784  |
| H                             | 2.026380  | 2.222742  | 1.345281  | H                              | 3.821053        | 2.099244        | 1.747724  |
| H                             | 0.560031  | 0.892561  | 2.623811  | H                              | 5.736493        | 1.105281        | 0.515802  |
| H                             | 0.787395  | 4.308440  | 0.673377  | H                              | 5.334982        | -0.731940       | -1.109498 |
| H                             | -0.114390 | 3.384090  | -0.533936 | H                              | 3.035344        | -1.581933       | -1.481639 |

|   |           |           |           |
|---|-----------|-----------|-----------|
| H | -1.151817 | -1.160231 | 2.514145  |
| H | -3.085829 | -1.500166 | 1.063080  |
| H | -3.282244 | -3.948499 | 0.750658  |
| H | -2.014392 | -3.919884 | -0.490267 |
| H | -1.614579 | -3.550120 | 1.195143  |

TS\_B\_D\_Ph\_nochain\_5tPh  
 SCF Energy: -805.866734798  
 Num. Imaginary Frequencies: 1  
 Imaginary Frequency: -599.8172

|   |           |           |           |
|---|-----------|-----------|-----------|
| C | 1.118441  | 1.136362  | -0.016304 |
| N | 0.990484  | 0.584774  | -1.323253 |
| N | -0.225684 | 0.068493  | -1.448612 |
| C | 2.054051  | -0.396236 | -0.281830 |
| C | 3.386233  | -0.324567 | -0.689801 |
| C | 1.575576  | -1.527109 | 0.382977  |
| C | 4.252879  | -1.374544 | -0.388287 |
| H | 3.738596  | 0.517041  | -1.274204 |
| C | 2.448385  | -2.571872 | 0.665496  |
| H | 0.534262  | -1.591969 | 0.682062  |
| C | 3.792811  | -2.499464 | 0.292512  |
| H | 5.286957  | -1.314942 | -0.712346 |
| H | 2.073680  | -3.444416 | 1.191092  |
| H | 4.468490  | -3.316677 | 0.521127  |
| C | -0.455184 | 1.395160  | 2.034297  |
| H | -0.251662 | 0.592399  | 2.754494  |
| C | -0.128062 | 0.966248  | 0.640570  |
| C | -0.917267 | 0.313930  | -0.302731 |
| C | 2.070797  | 2.266659  | 0.287656  |
| C | 1.420011  | 3.618184  | -0.026710 |
| H | 2.982561  | 2.162226  | -0.299515 |
| H | -1.509856 | 1.667184  | 2.127437  |
| C | -2.326000 | -0.112313 | -0.196420 |
| C | -2.850895 | -0.578666 | 1.015014  |
| C | -4.182361 | -0.983924 | 1.097002  |
| C | -5.002177 | -0.926306 | -0.029295 |
| C | -4.483086 | -0.469304 | -1.242139 |
| C | -3.152917 | -0.067734 | -1.326746 |
| H | -2.212918 | -0.647772 | 1.890944  |
| H | -4.576381 | -1.349781 | 2.039885  |
| H | -6.039338 | -1.239710 | 0.035642  |
| H | -5.116384 | -0.425280 | -2.122614 |
| H | -2.742433 | 0.287719  | -2.266562 |
| H | 2.358213  | 2.207754  | 1.343022  |
| H | 0.148260  | 2.256582  | 2.332388  |
| H | 2.126522  | 4.430893  | 0.159531  |
| H | 1.119018  | 3.659189  | -1.077504 |
| H | 0.531399  | 3.789658  | 0.586603  |

TS\_B\_E\_Ph\_nochain\_EtPh  
 SCF Energy: -805.868809365  
 Num. Imaginary Frequencies: 1  
 Imaginary Frequency: -491.8366

|   |           |           |           |
|---|-----------|-----------|-----------|
| C | -0.976662 | 0.393970  | -0.207512 |
| N | -0.535259 | 1.575462  | -0.735947 |
| N | 0.785025  | 1.603826  | -0.660016 |
| C | -2.403264 | 0.255300  | 0.165832  |
| C | -2.929803 | -0.927033 | 0.702267  |
| C | -3.257078 | 1.353037  | -0.012825 |

|   |           |           |           |
|---|-----------|-----------|-----------|
| C | -4.274492 | -1.007808 | 1.058081  |
| H | -2.302761 | -1.802958 | 0.827201  |
| C | -4.601053 | 1.268914  | 0.340223  |
| H | -2.851538 | 2.270484  | -0.423534 |
| C | -5.115302 | 0.089634  | 0.879772  |
| H | -4.663904 | -1.933034 | 1.470618  |
| H | -5.247157 | 2.129152  | 0.196419  |
| H | -6.162491 | 0.025940  | 1.157711  |
| C | 0.211063  | -1.526255 | 1.209336  |
| H | -0.067541 | -2.475751 | 0.740511  |
| C | 0.168796  | -0.364258 | 0.260302  |
| C | 1.251416  | 0.484346  | -0.078268 |
| C | -0.441715 | -0.931537 | -1.613638 |
| H | 0.172648  | -0.243993 | -2.188737 |
| C | -1.774482 | -1.241077 | -2.249587 |
| H | -0.470230 | -1.352275 | 2.046435  |
| C | 2.693557  | 0.252520  | 0.096763  |
| C | 3.548399  | 1.328139  | 0.376875  |
| C | 4.917408  | 1.123345  | 0.523284  |
| C | 5.454751  | -0.159431 | 0.398522  |
| C | 4.613150  | -1.234663 | 0.116188  |
| C | 3.242704  | -1.029973 | -0.037564 |
| H | 3.126042  | 2.322823  | 0.480027  |
| H | 5.566811  | 1.965489  | 0.741690  |
| H | 6.521786  | -0.318384 | 0.517623  |
| H | 5.023179  | -2.233768 | 0.006165  |
| H | 2.599637  | -1.870939 | -0.283990 |
| H | 1.219835  | -1.635023 | 1.610865  |
| H | 0.094909  | -1.850361 | -1.379281 |
| H | -1.538325 | -1.766862 | -3.183176 |
| H | -2.390938 | -1.908461 | -1.645767 |
| H | -2.342683 | -0.340116 | -2.487338 |
